# Supplementary material
Source: PubMed Central journal article supplement (PMC3168874)

### Afghanistan Data, and estimated NMR

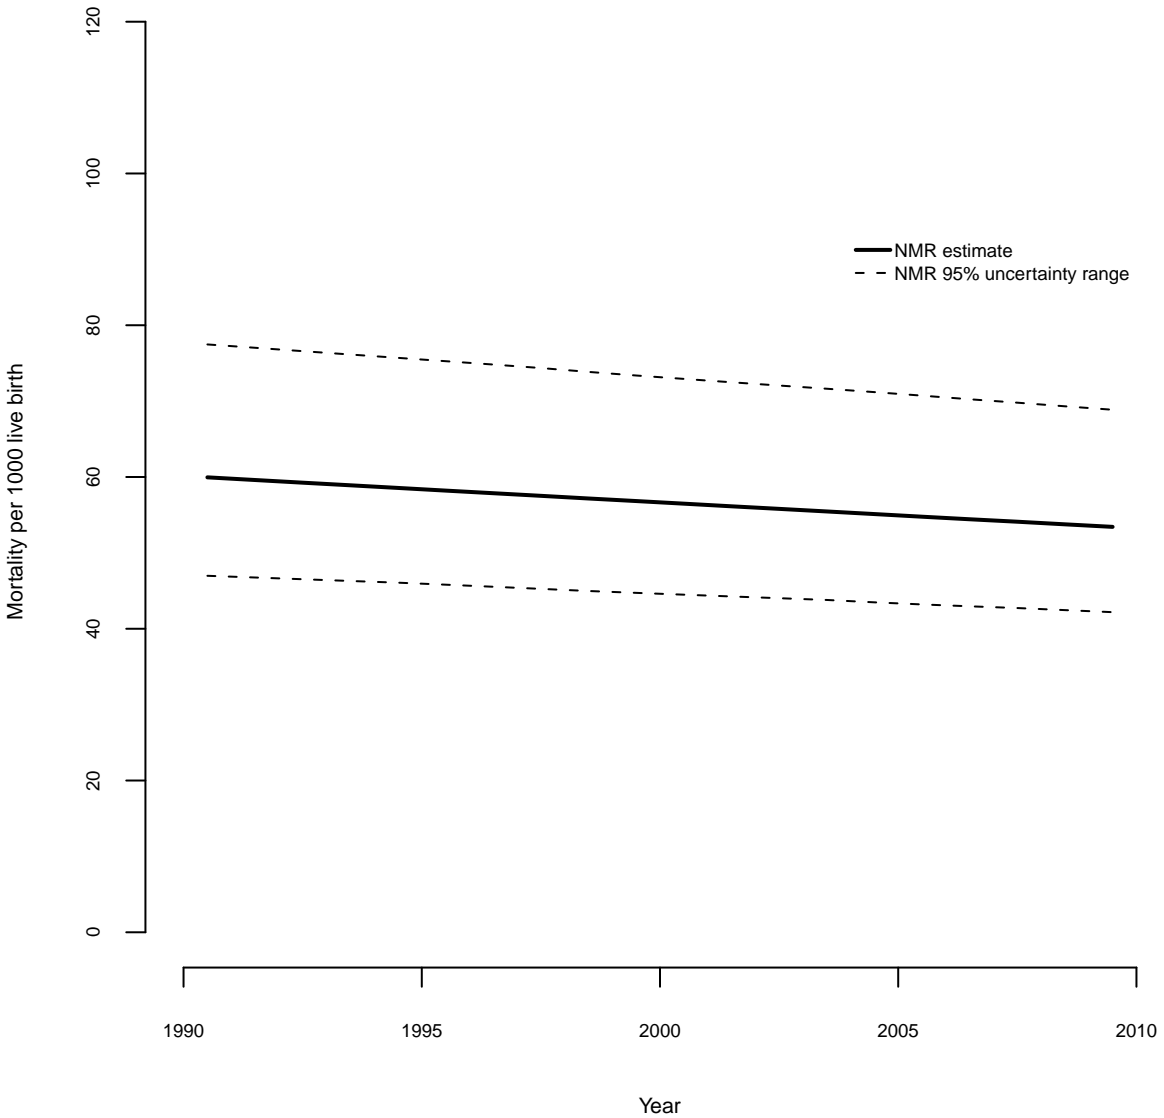

### Afghanistan NMR and U5MR

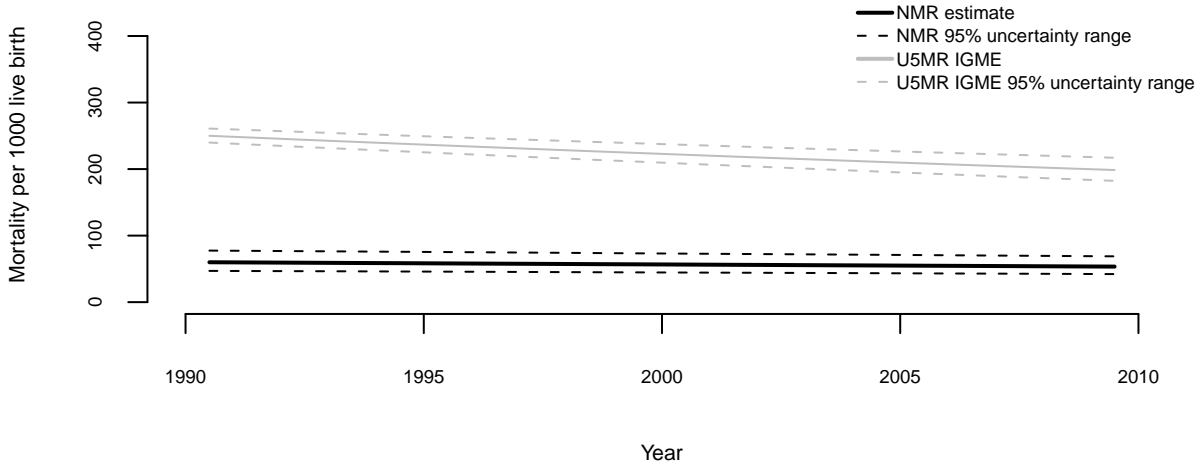

### Afghanistan NMR as percentage of U5MR

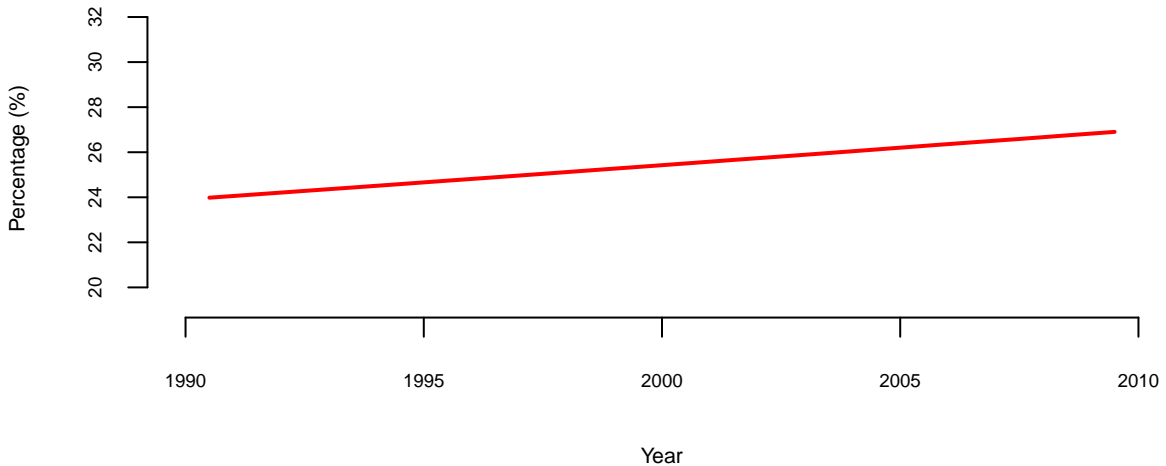

Albania  
Data, and estimated NMR

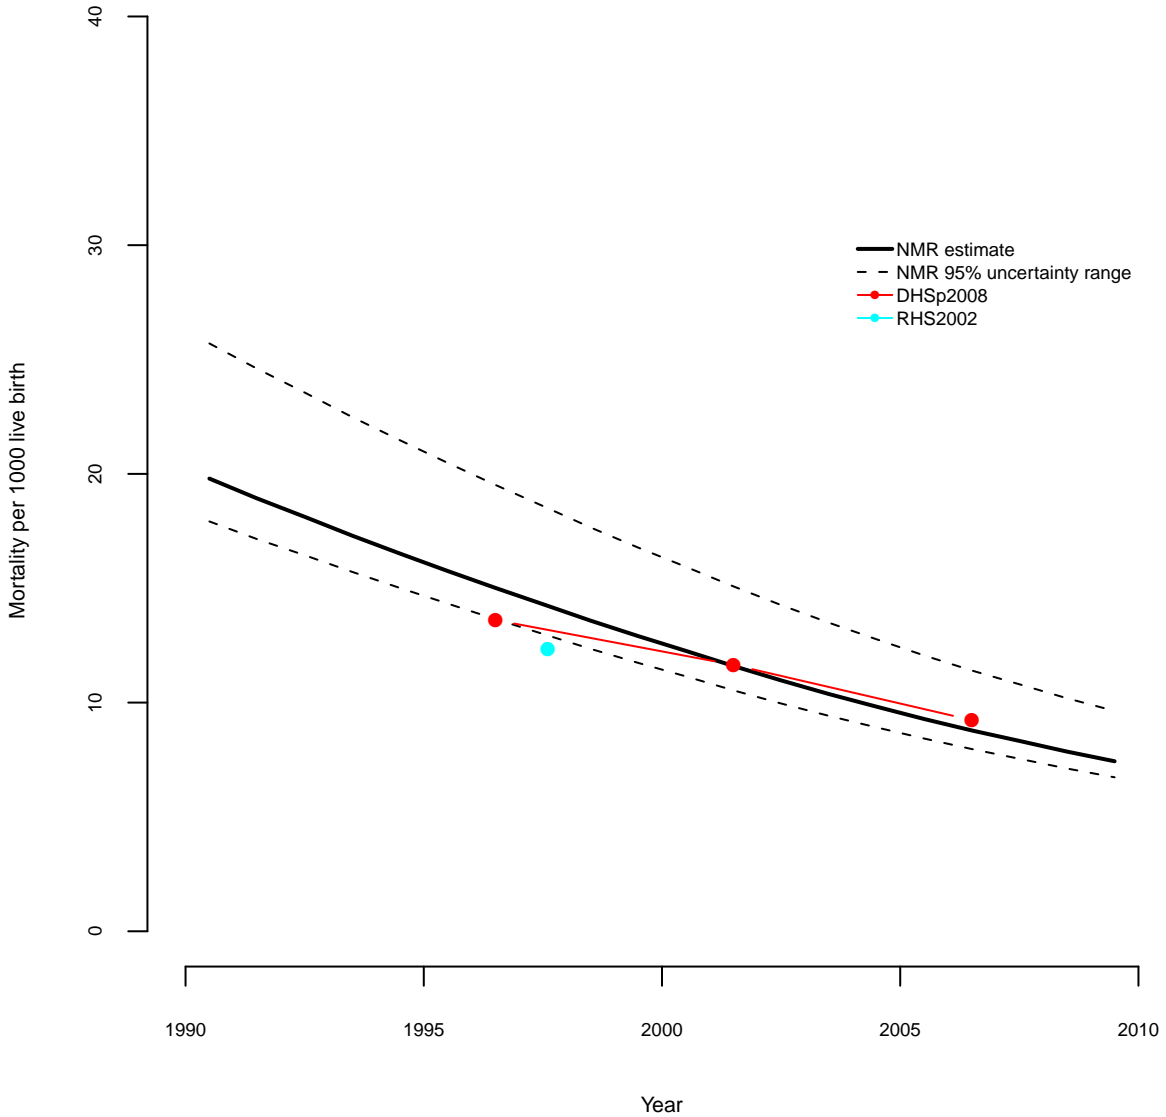

### Albania NMR and U5MR

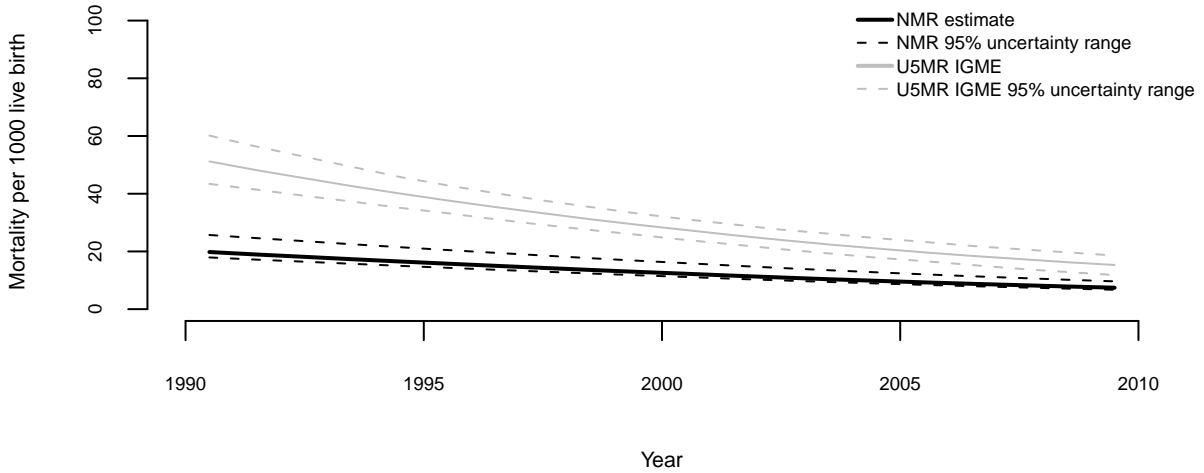

### Albania NMR as percentage of U5MR

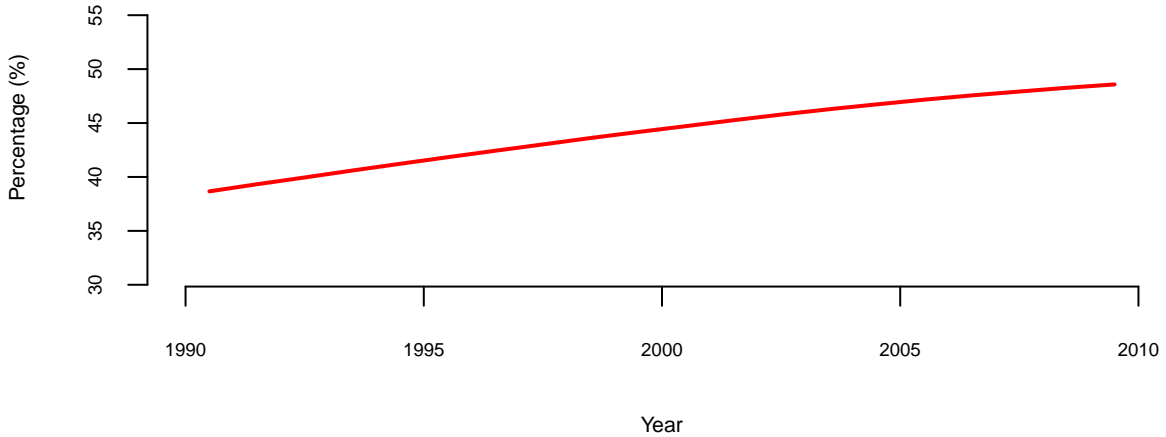

**Algeria**  
**Data, and estimated NMR**

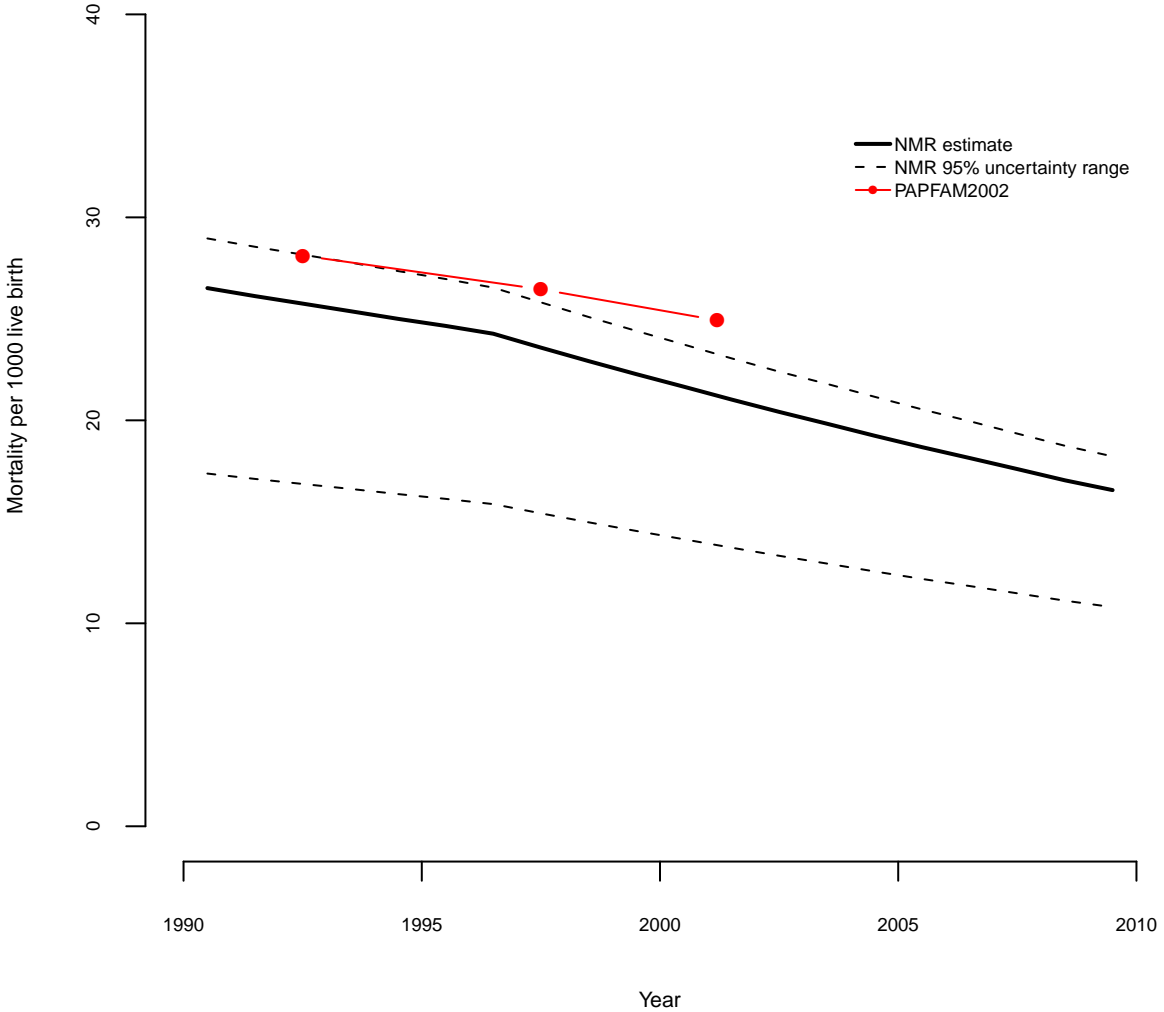

### Algeria NMR and U5MR

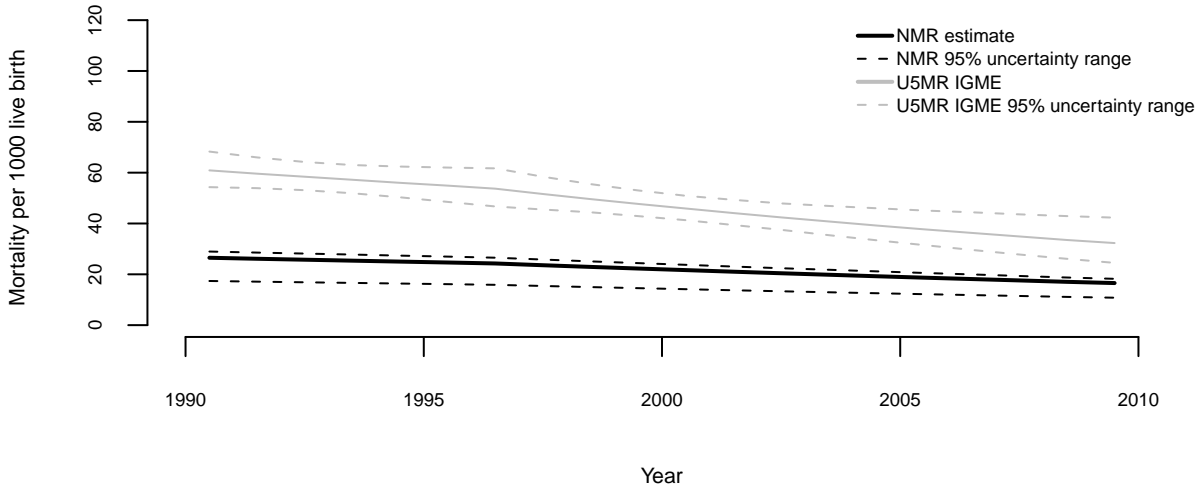

### Algeria NMR as percentage of U5MR

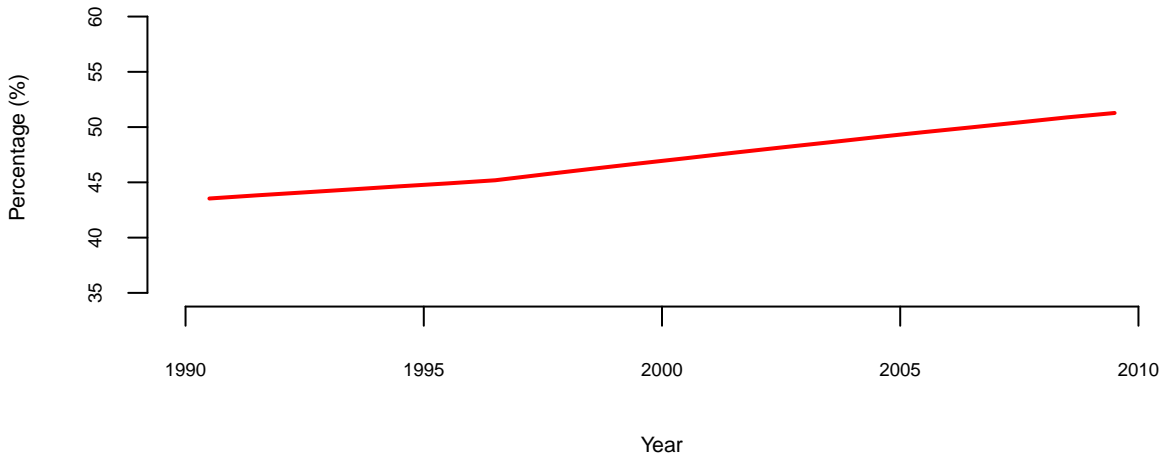

**Andorra**  
**Data, and estimated NMR**

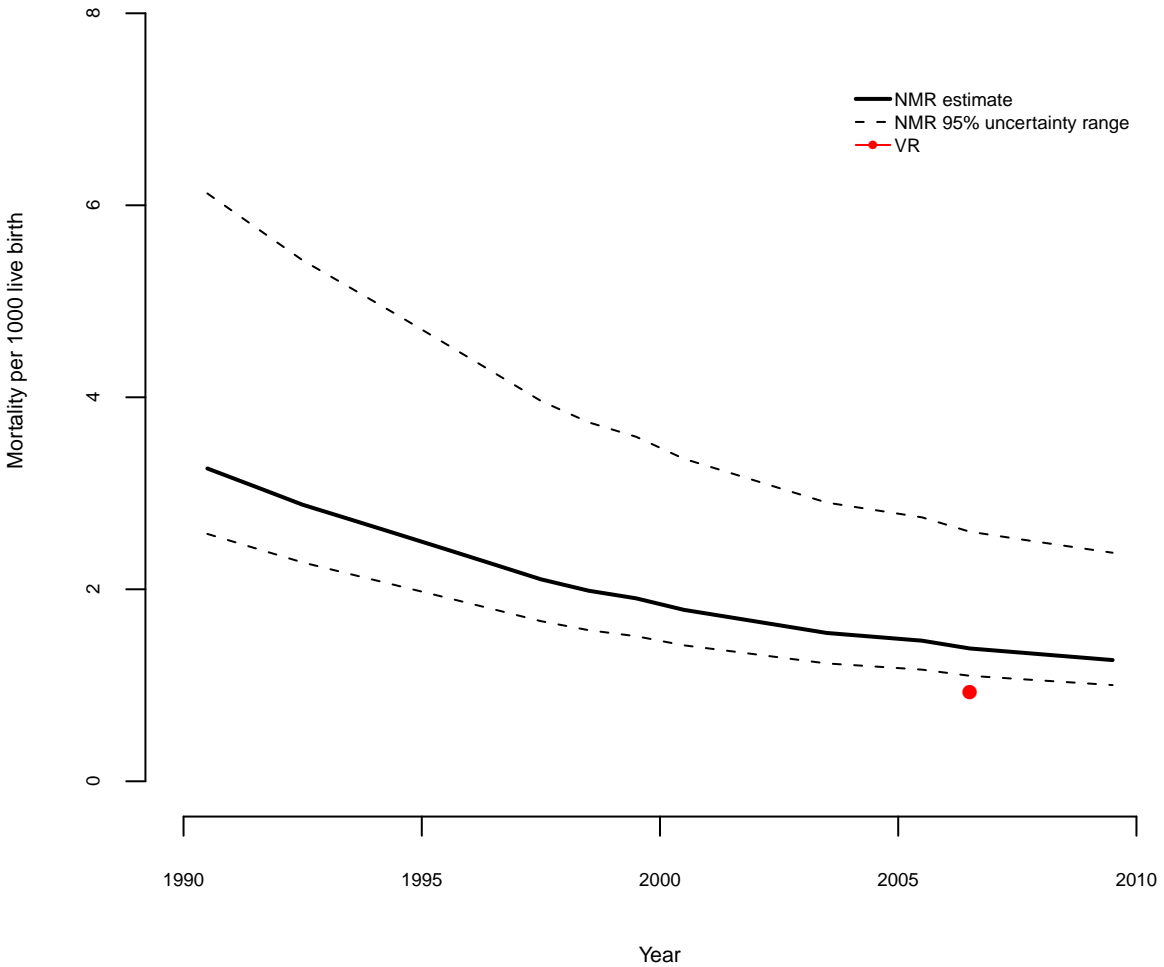

### Andorra NMR and U5MR

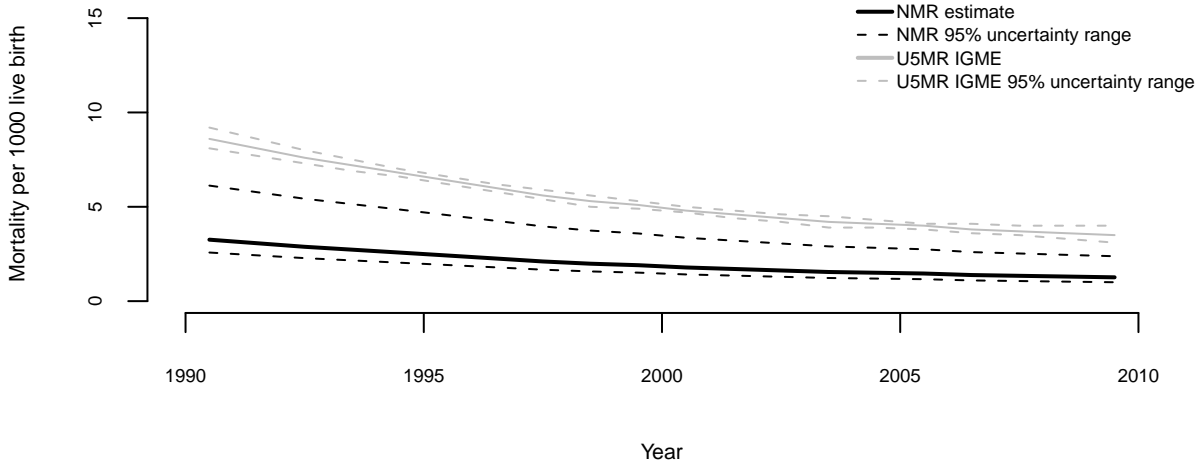

### Andorra NMR as percentage of U5MR

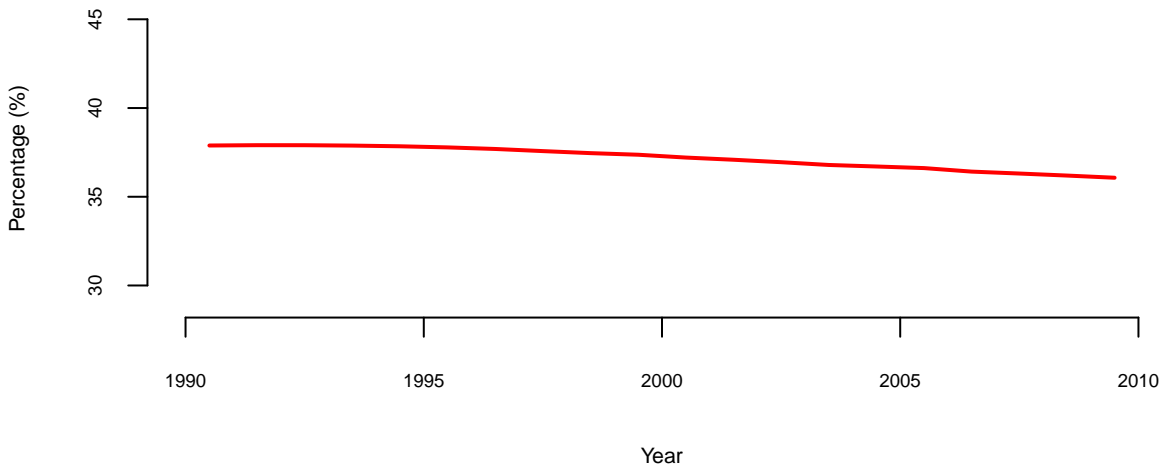



# Angola

## Data, and estimated NMR

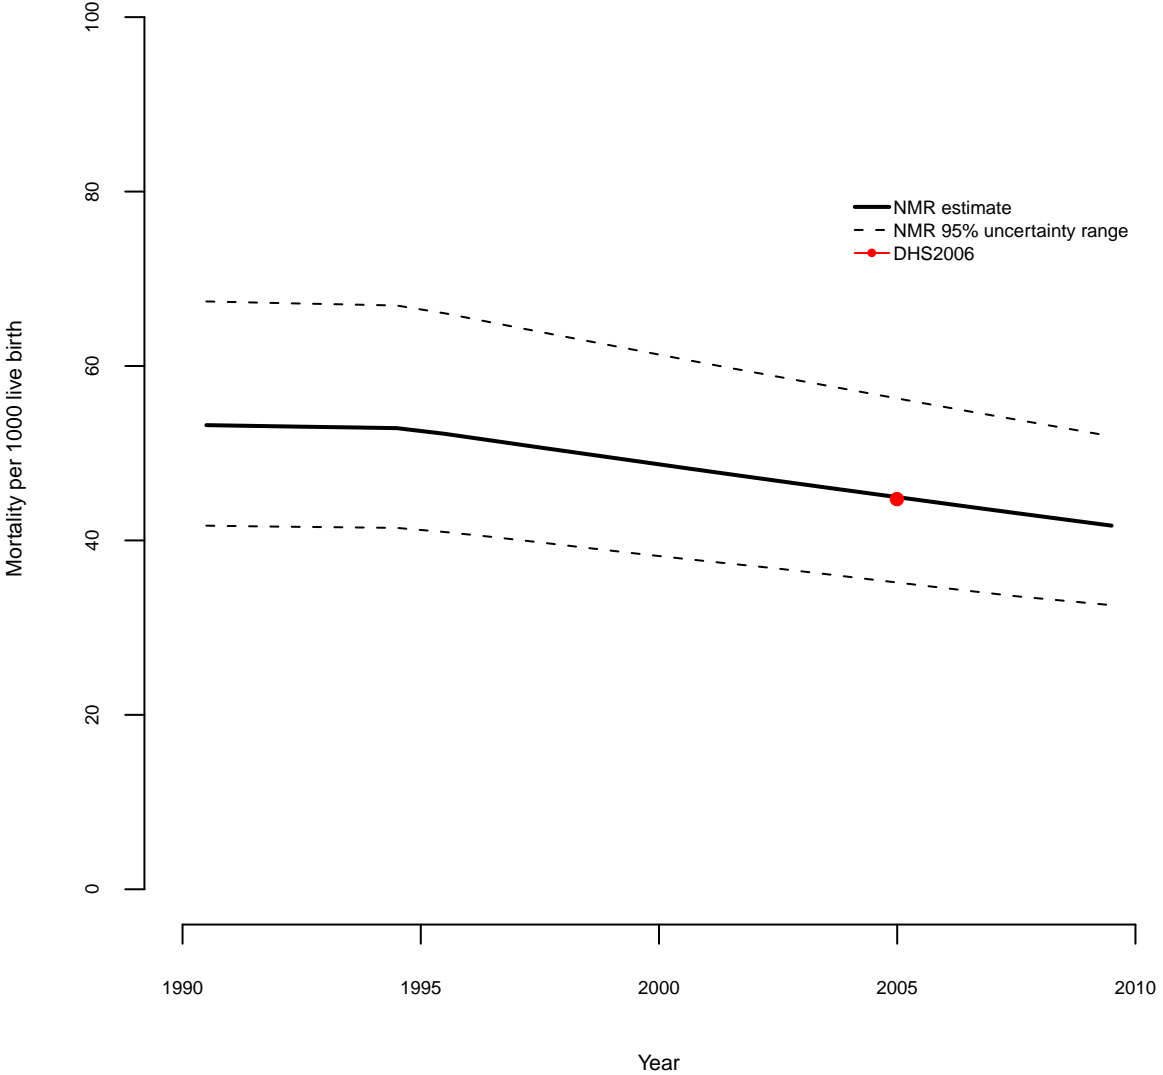

### Angola NMR and U5MR

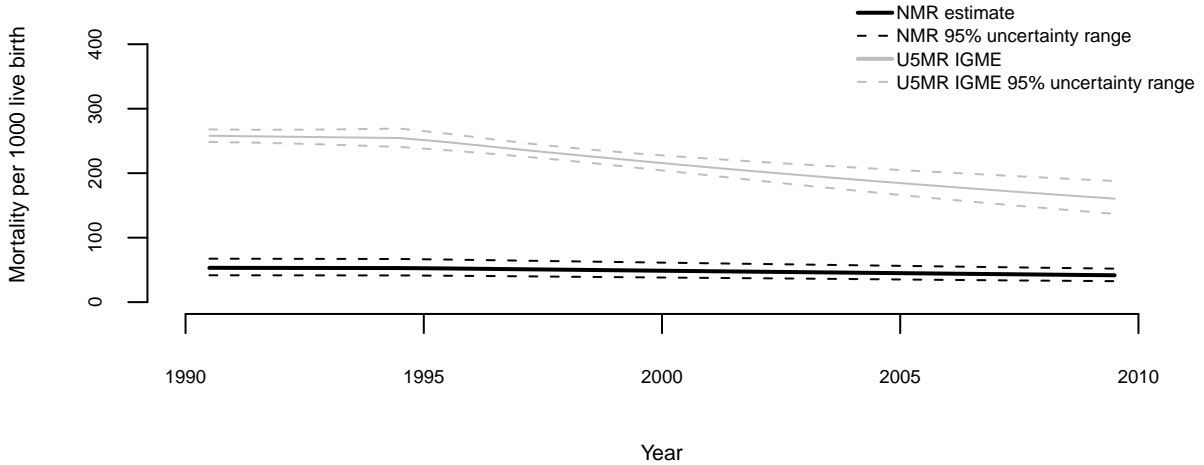

### Angola NMR as percentage of U5MR

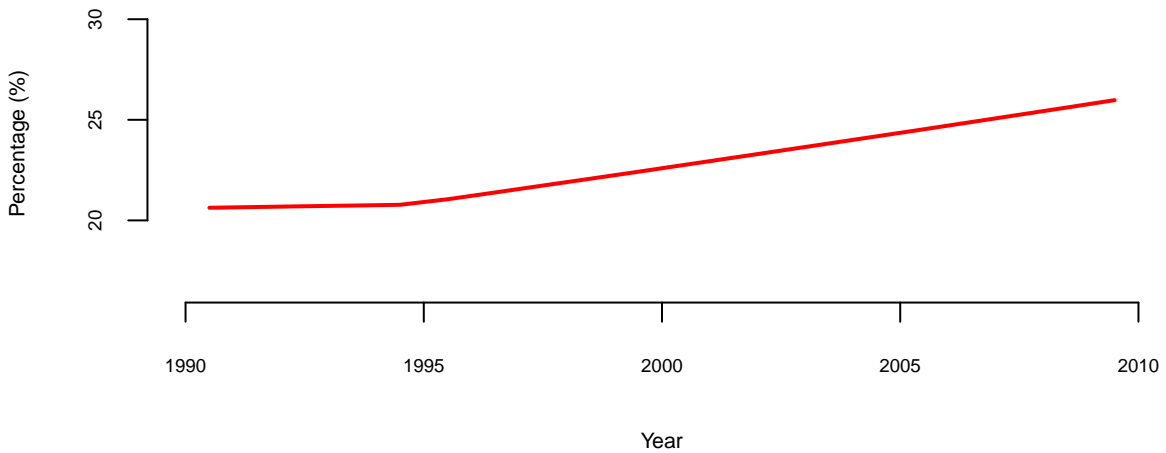

### Antigua and Barbuda Data, and estimated NMR

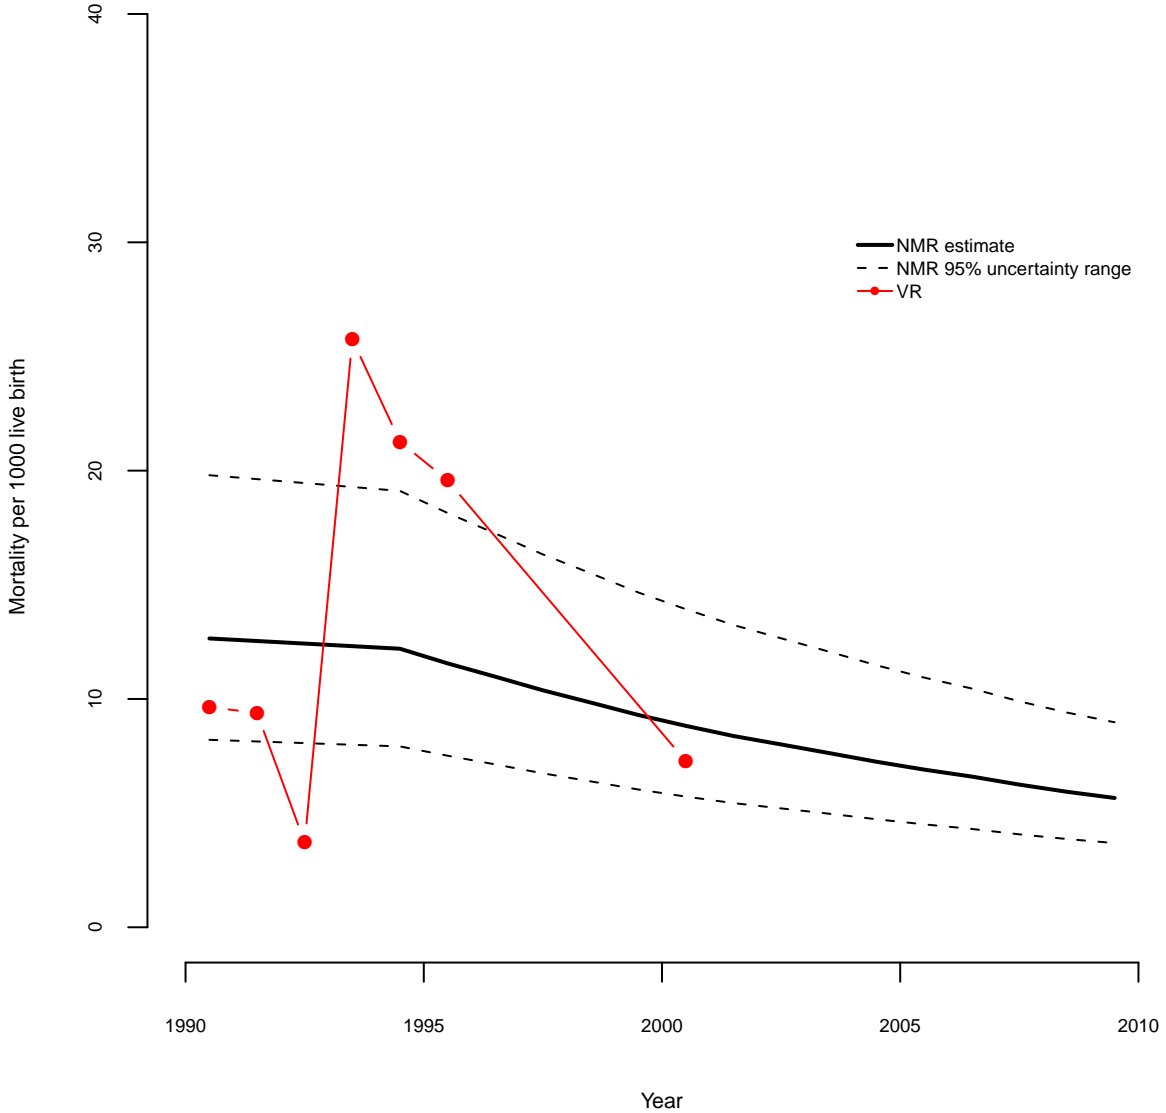

### Antigua and Barbuda NMR and U5MR

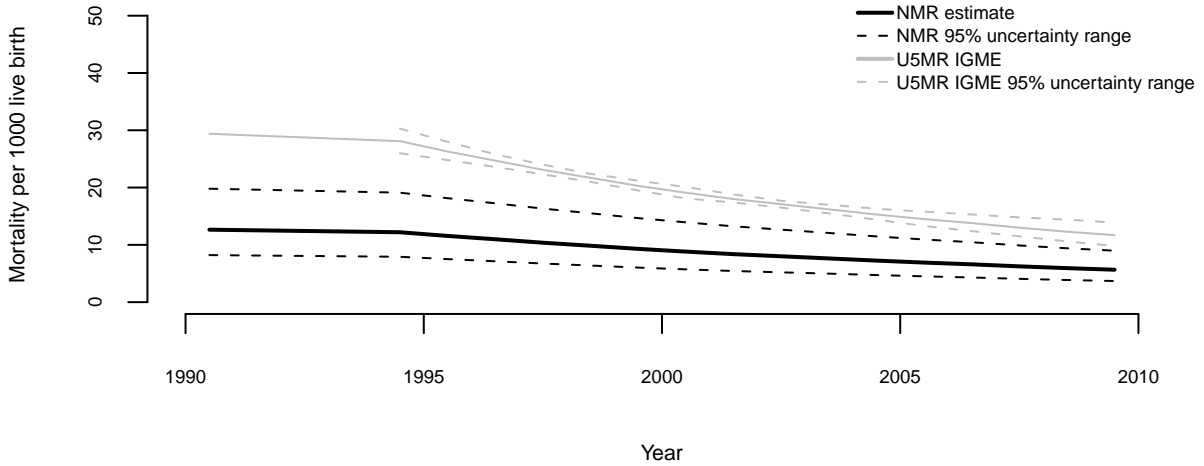

### Antigua and Barbuda NMR as percentage of U5MR

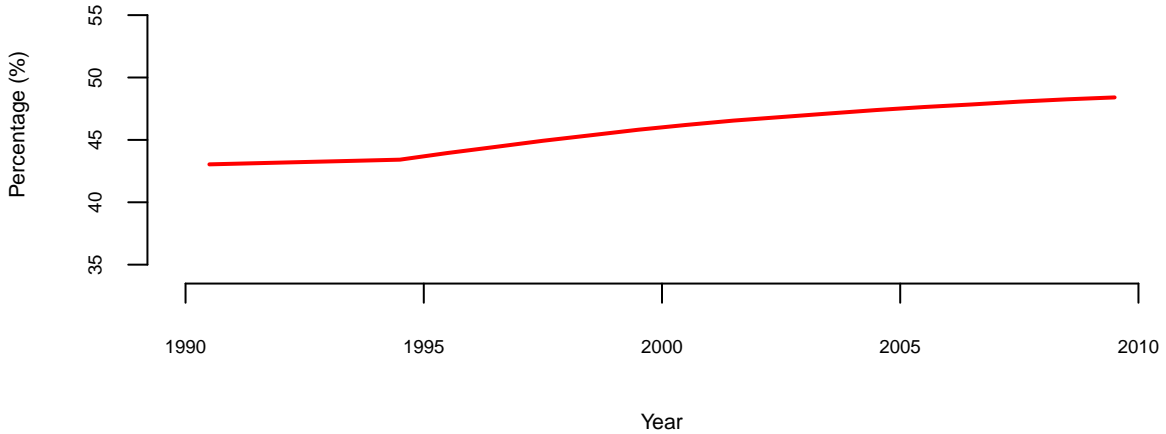

# Argentina

## Data, and estimated NMR

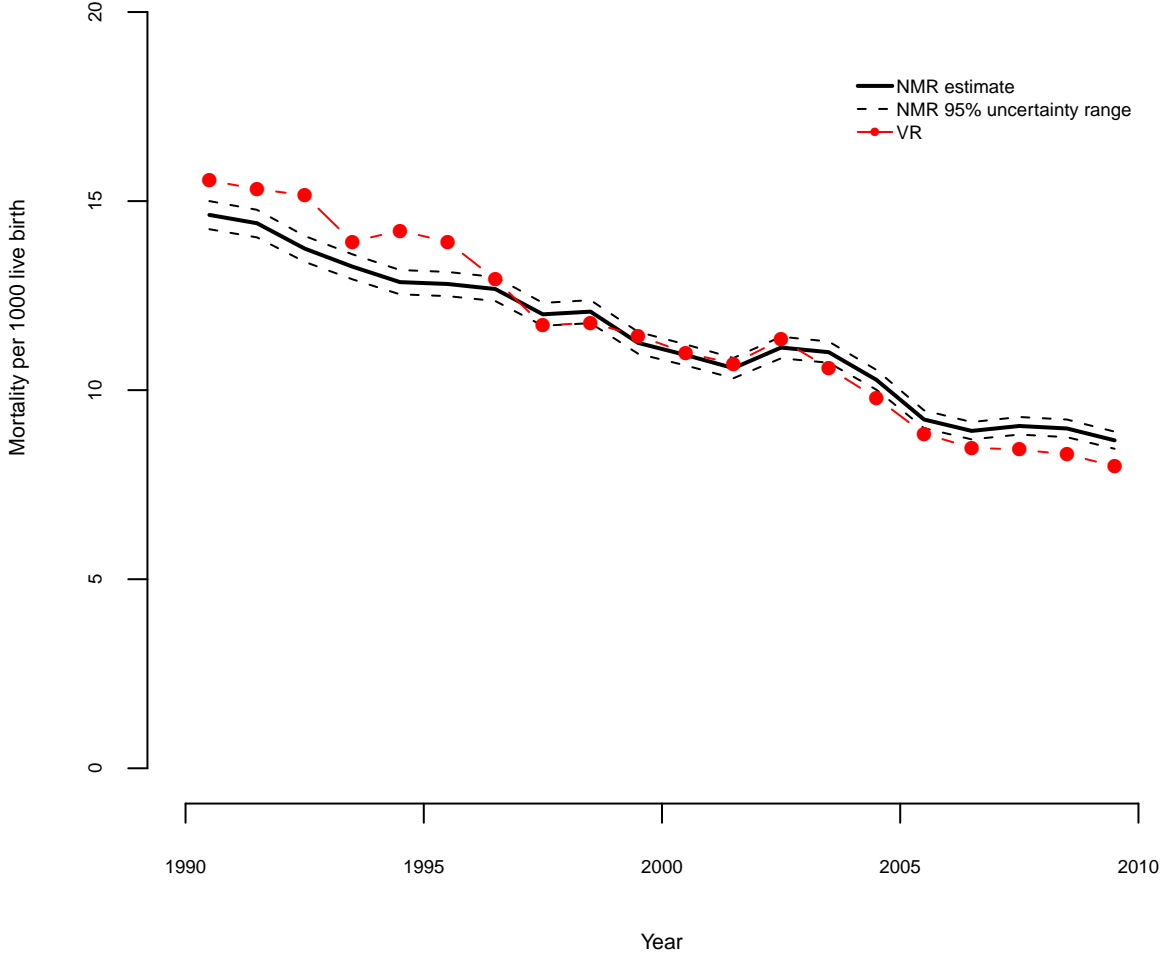

### Argentina NMR and U5MR

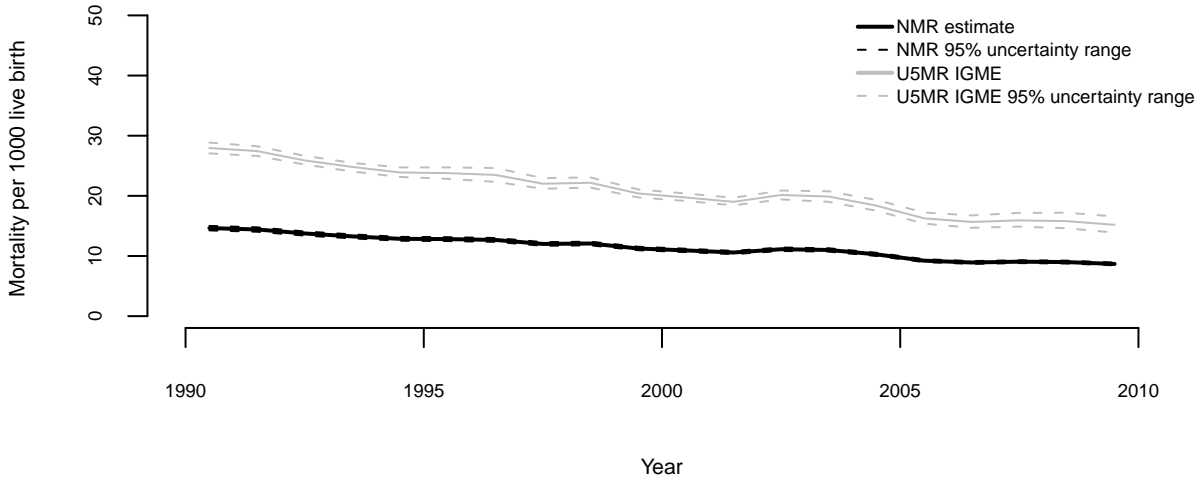

### Argentina NMR as percentage of U5MR

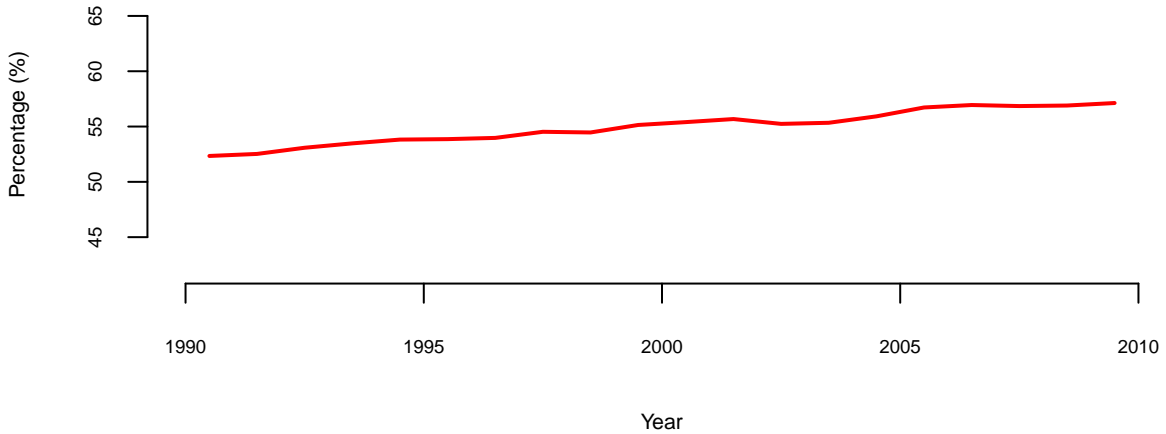

### Armenia Data, and estimated NMR

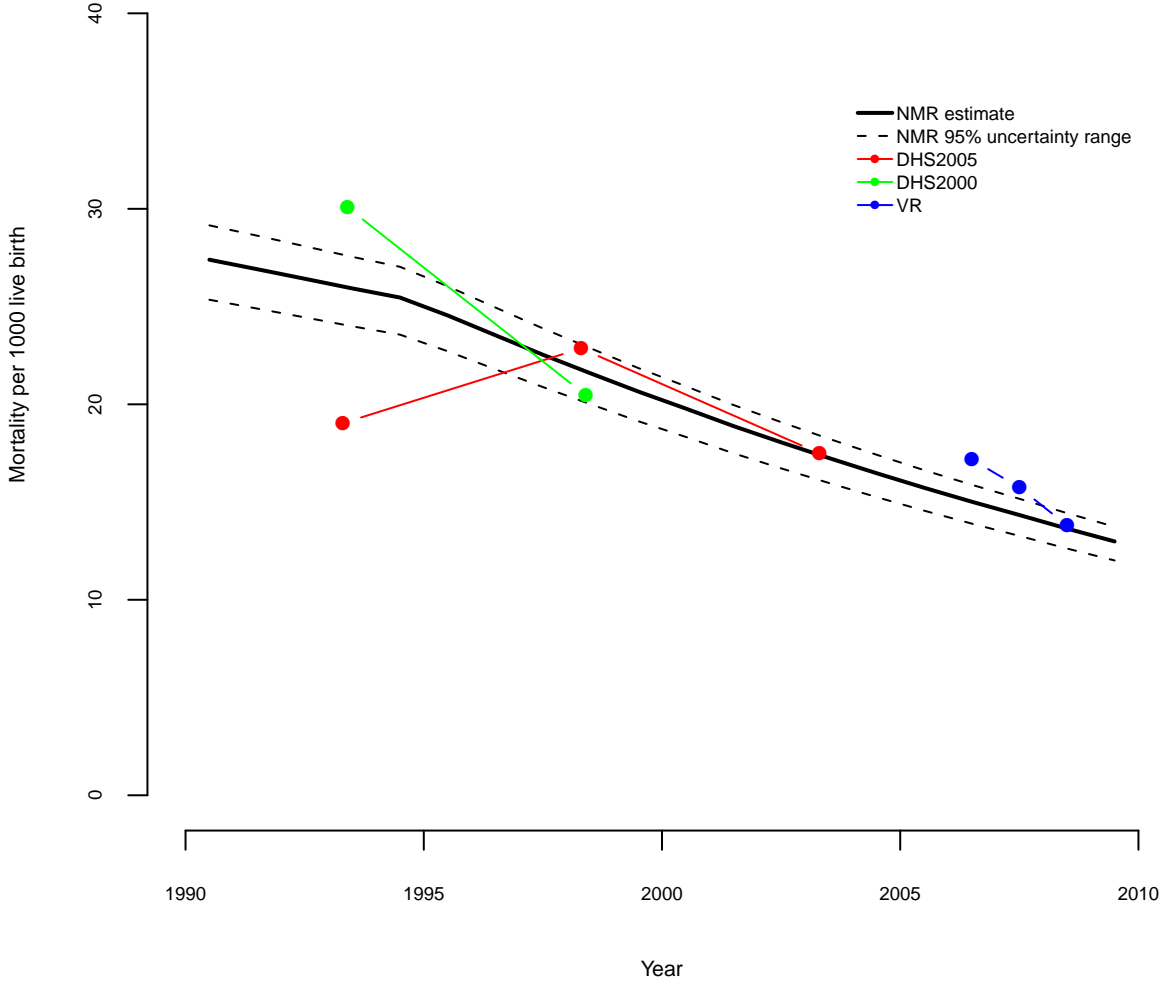

### Armenia NMR and U5MR

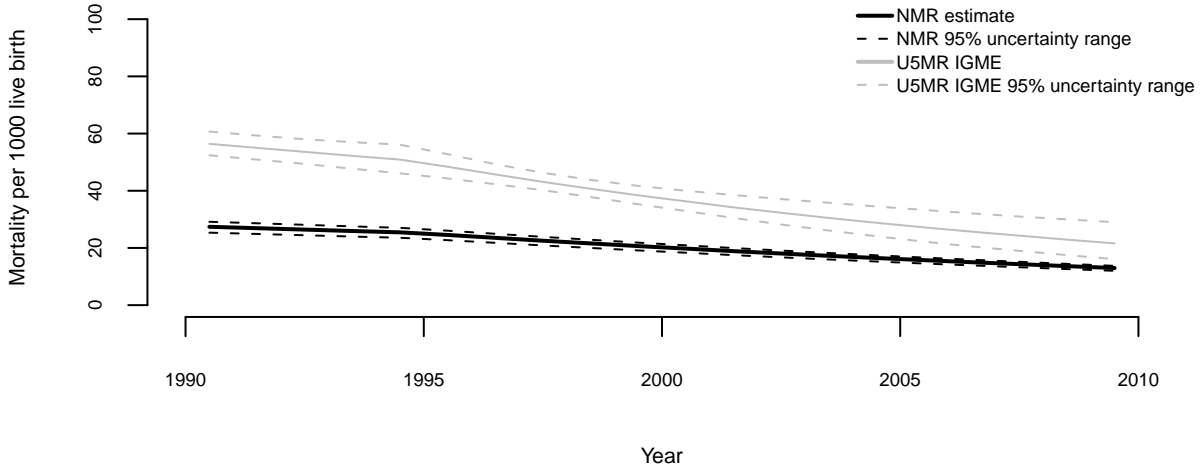

### Armenia NMR as percentage of U5MR

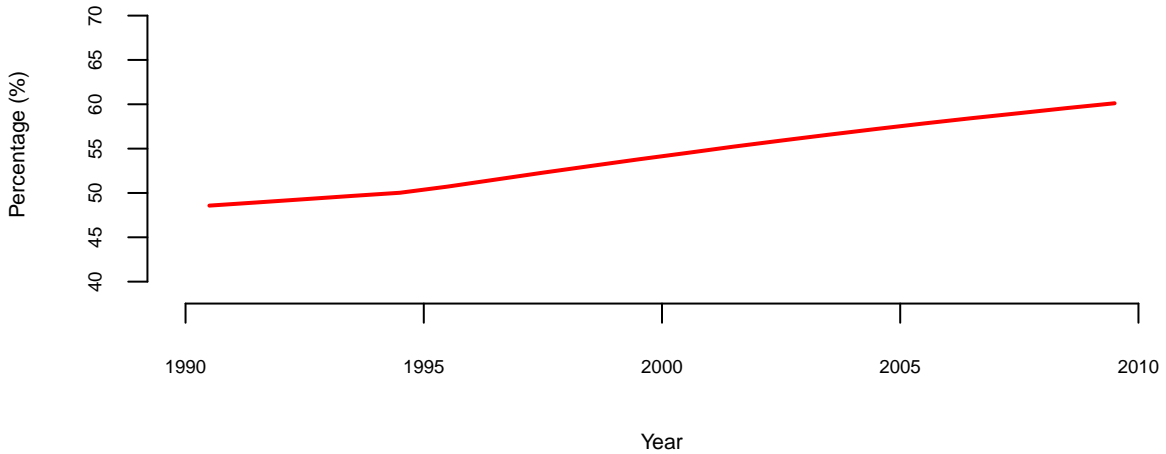



Australia  
Data, and estimated NMR

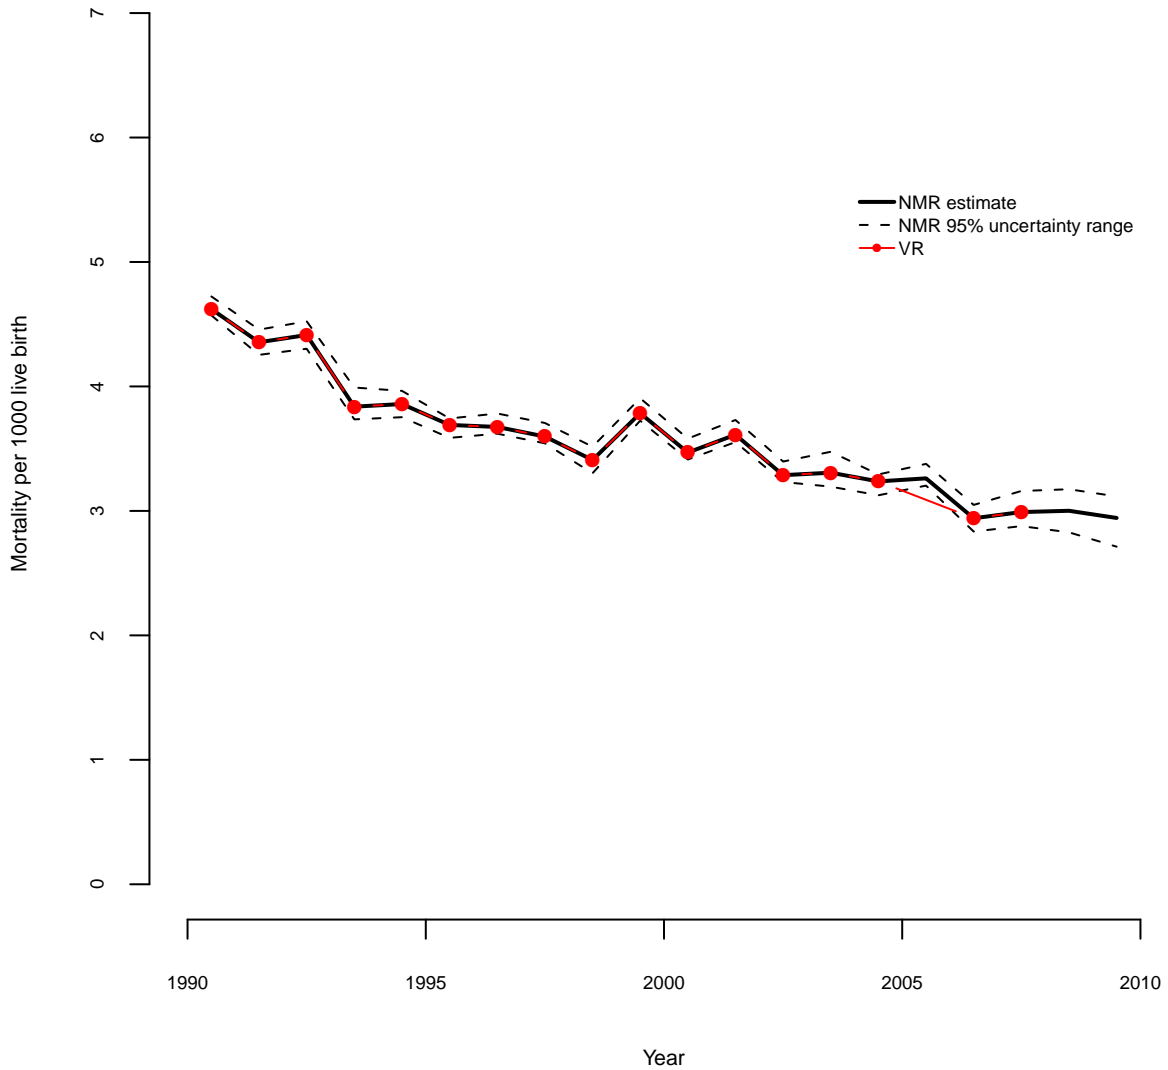

### Australia NMR and U5MR

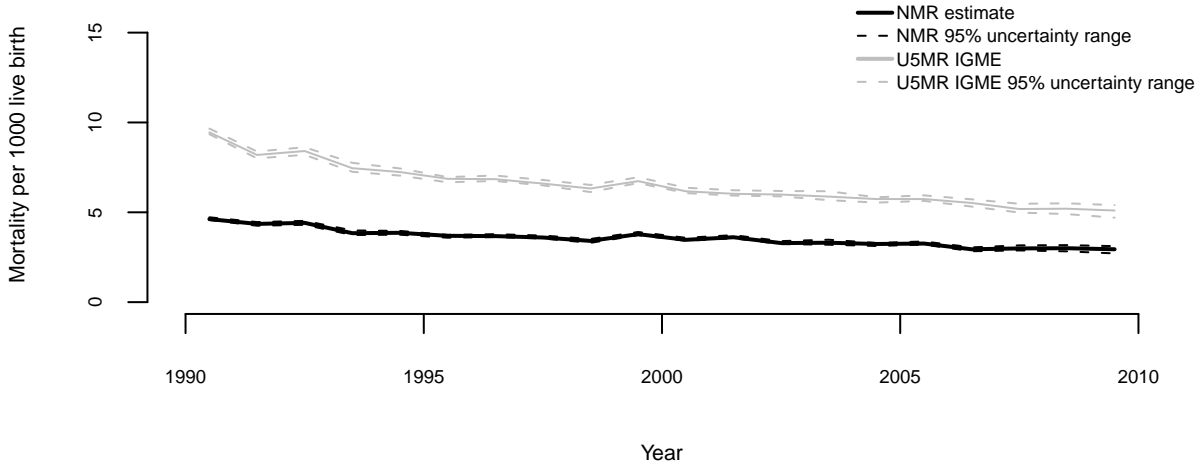

### Australia NMR as percentage of U5MR

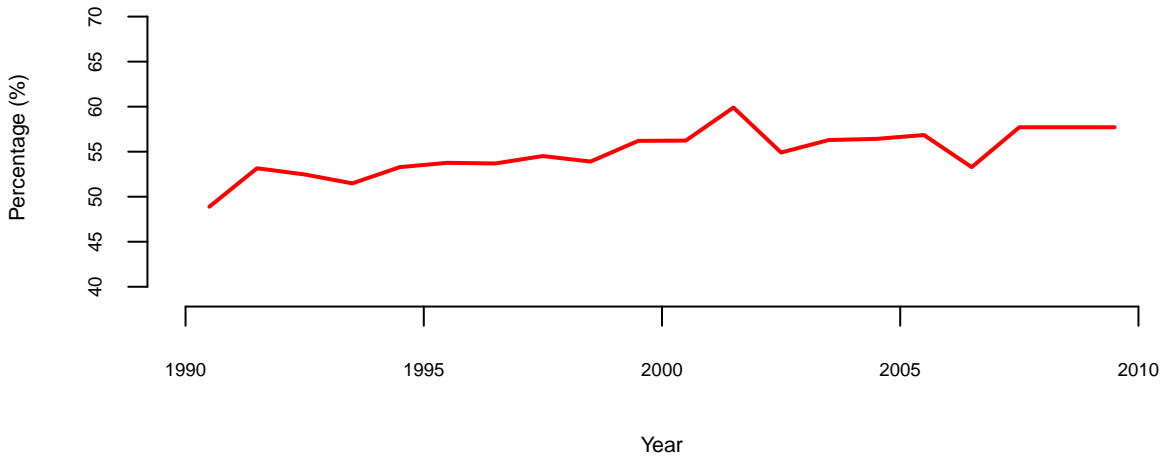

Austria  
Data, and estimated NMR

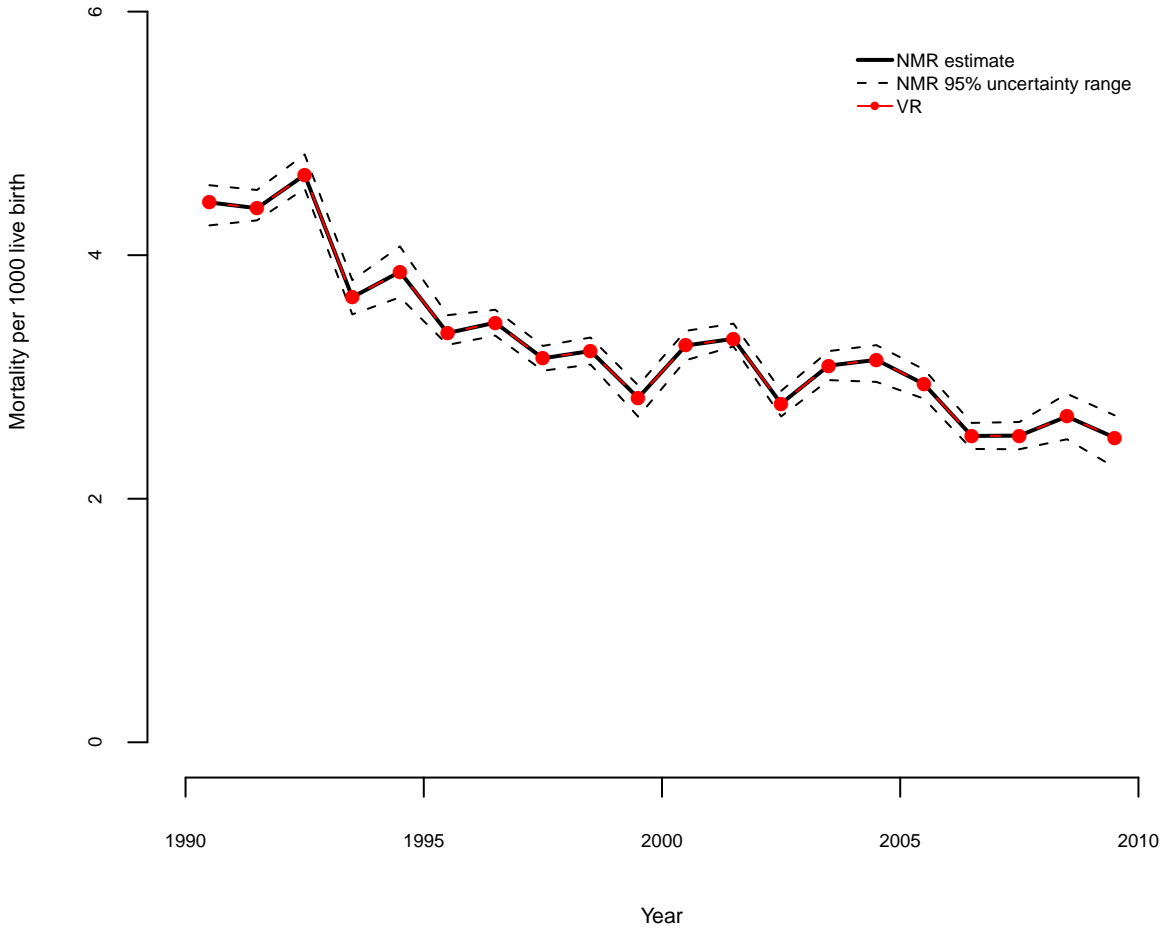

### Austria NMR and U5MR

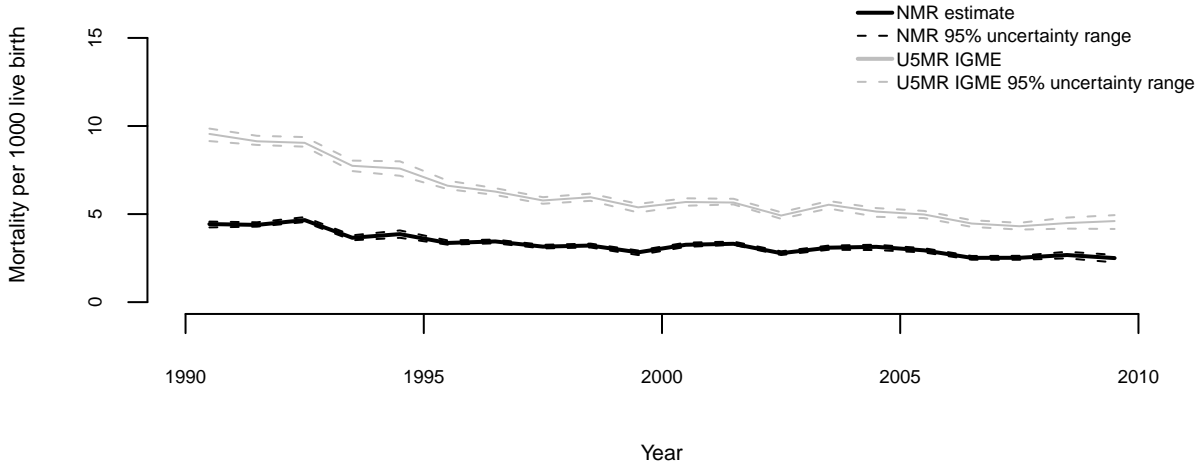

### Austria NMR as percentage of U5MR

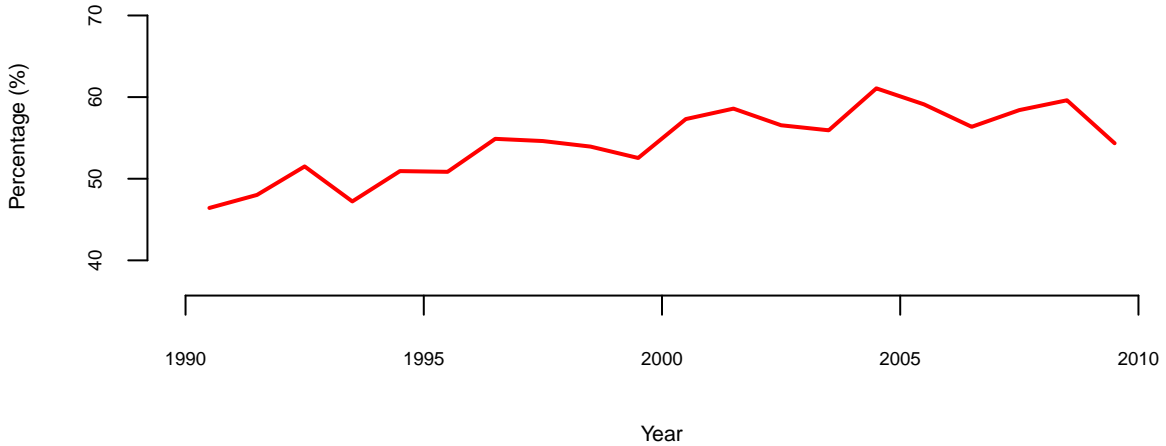

### Azerbaijan Data, and estimated NMR

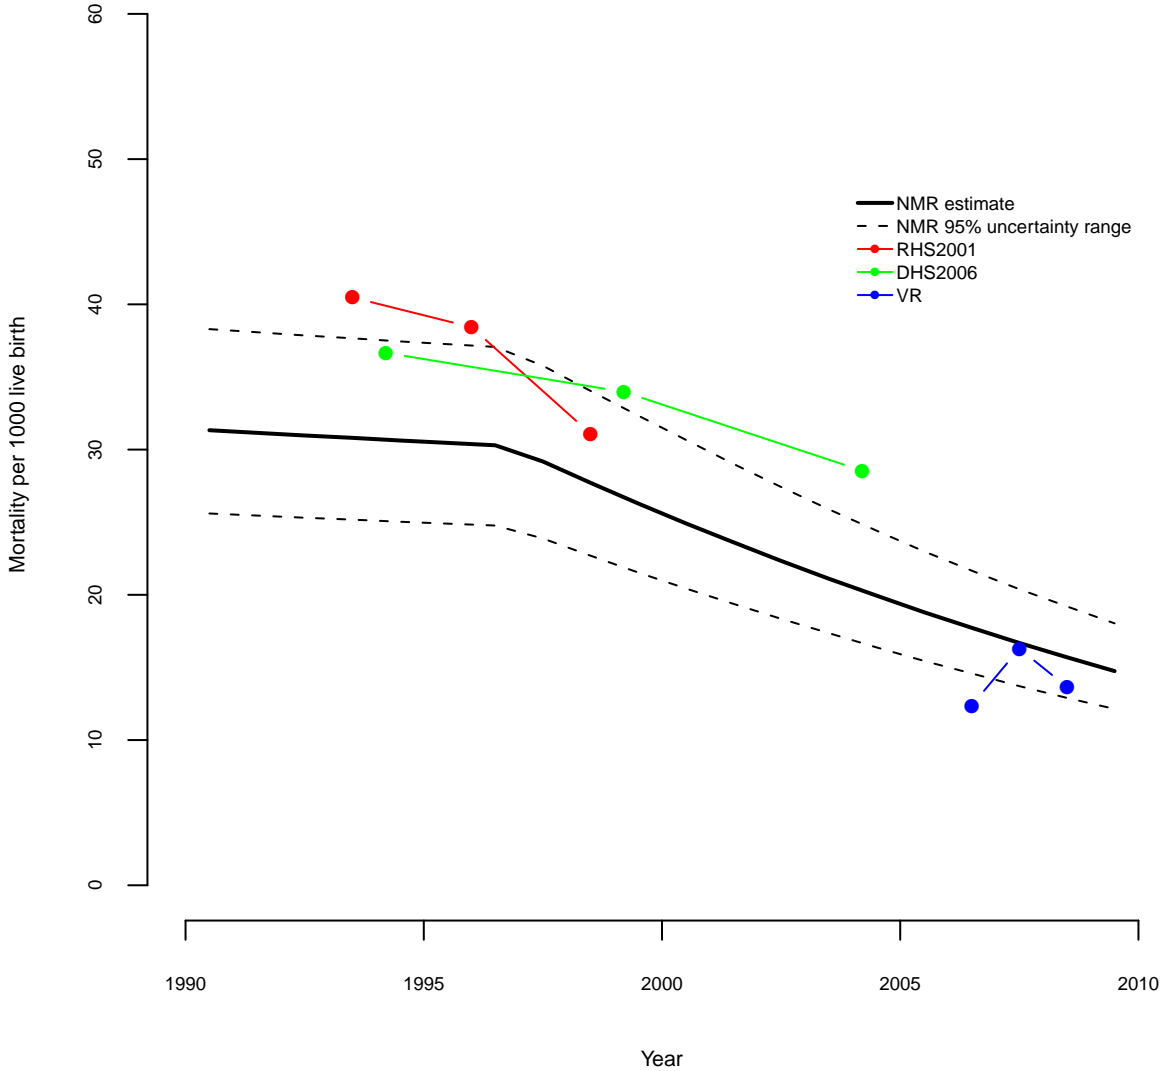

### Azerbaijan NMR and U5MR

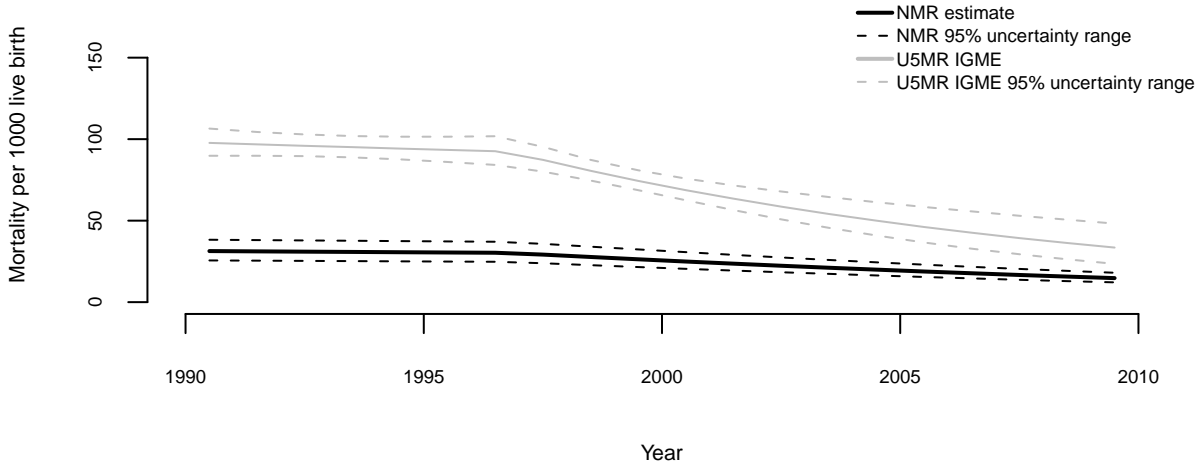

### Azerbaijan NMR as percentage of U5MR

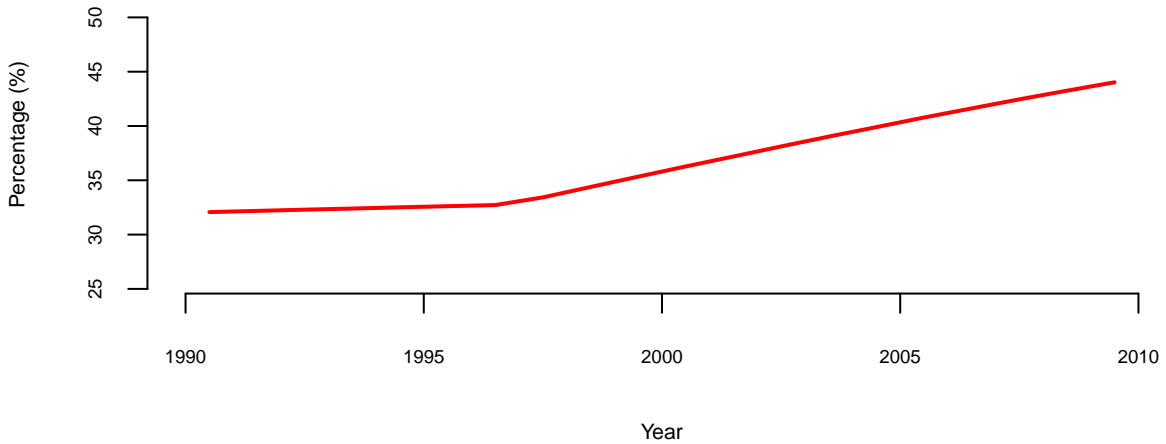

**Bahamas**  
**Data, and estimated NMR**

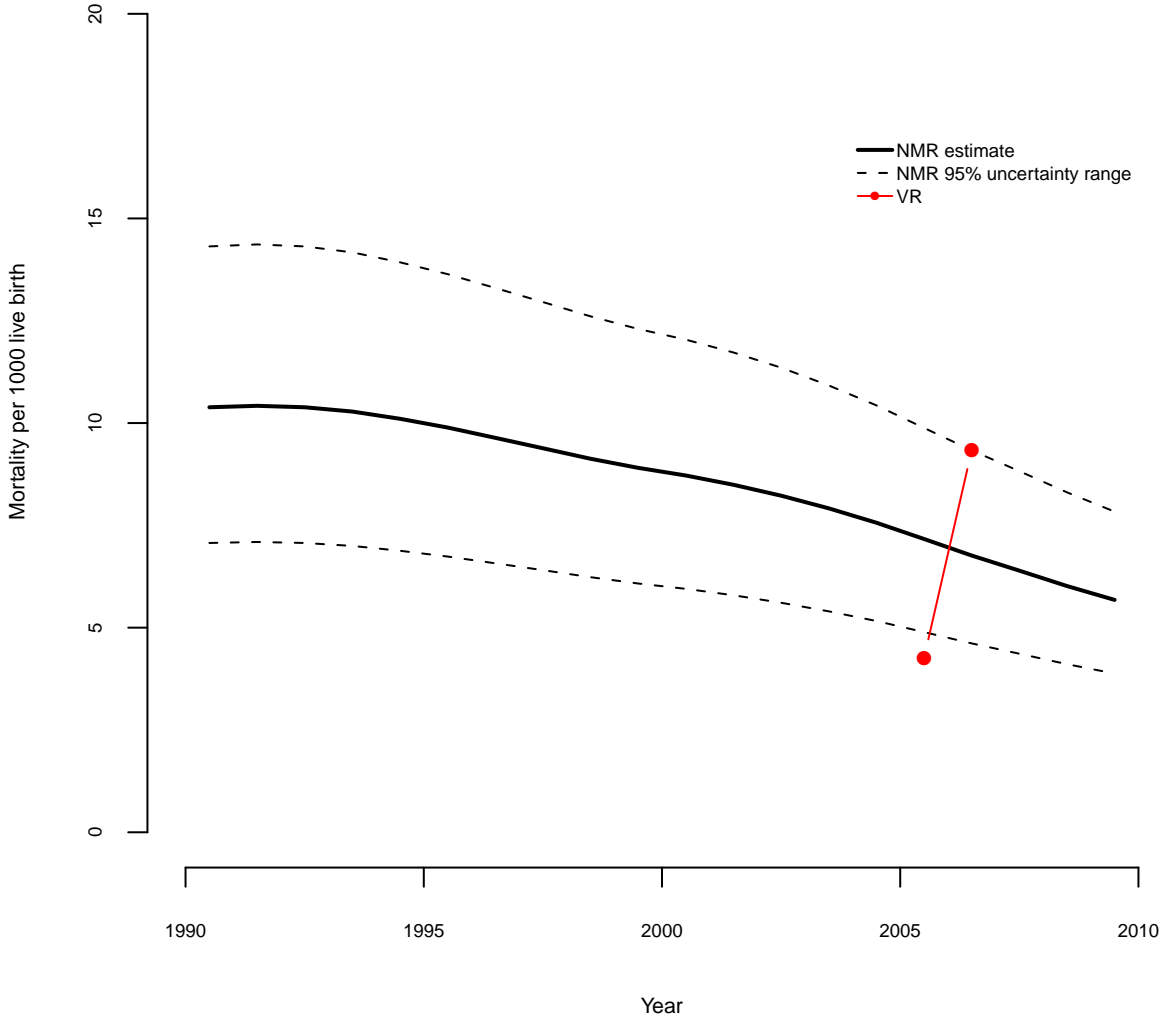

### Bahamas NMR and U5MR

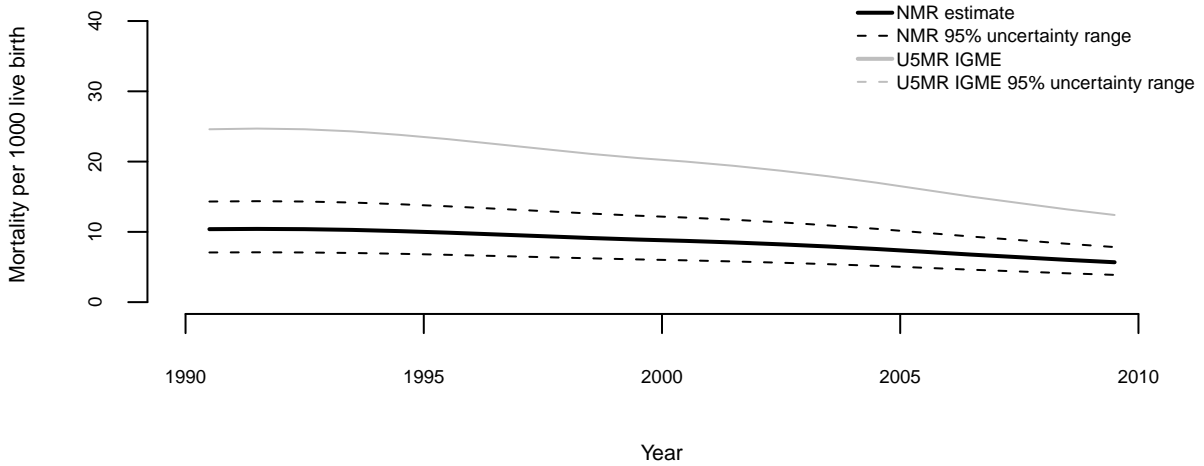

### Bahamas NMR as percentage of U5MR

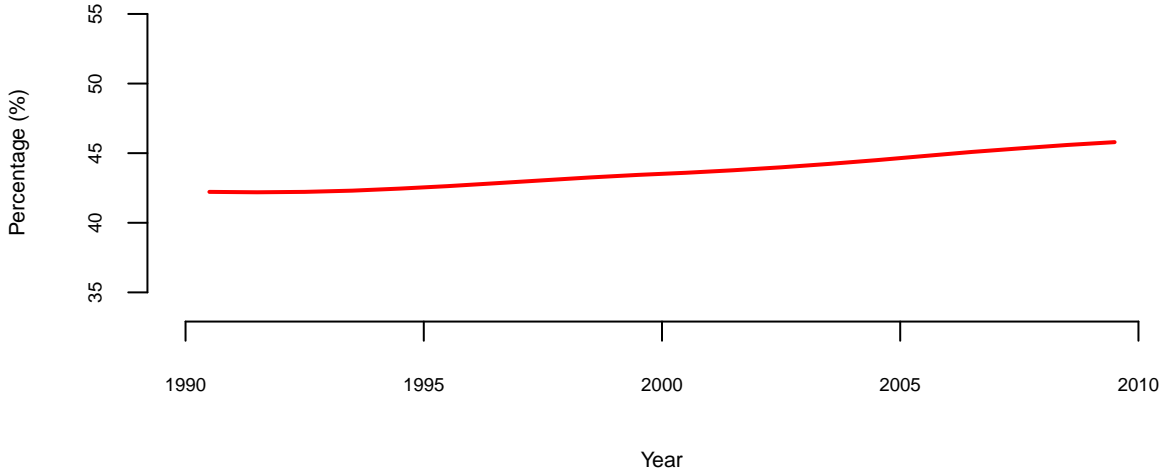



### Bahrain Data, and estimated NMR

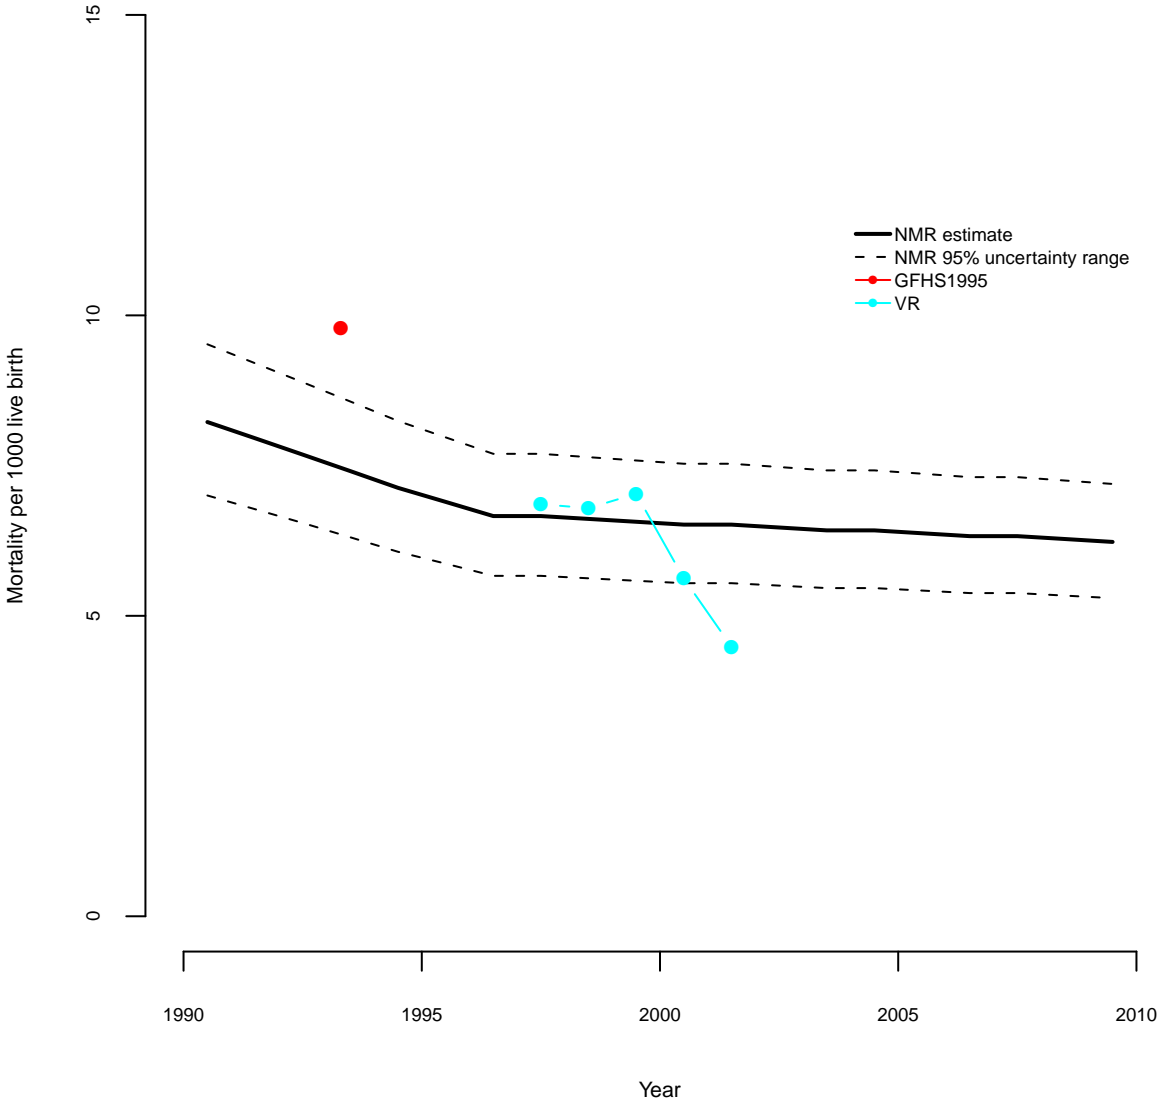

### Bahrain NMR and U5MR

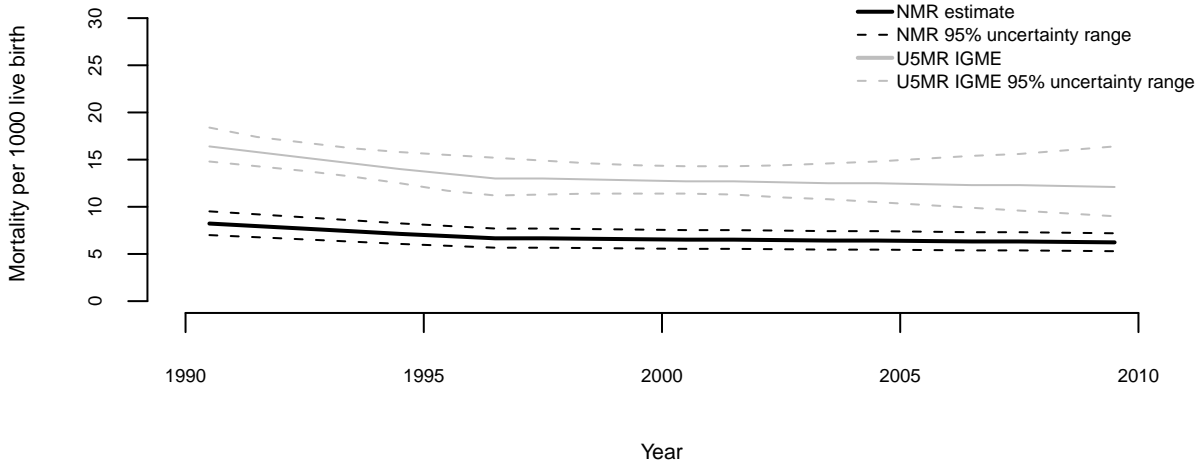

### Bahrain NMR as percentage of U5MR

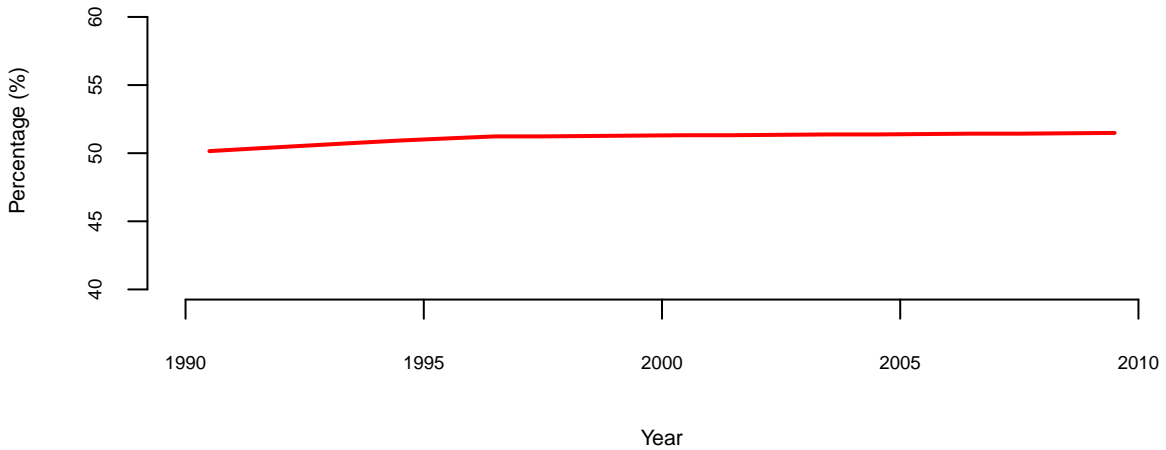

### Bangladesh Data, and estimated NMR

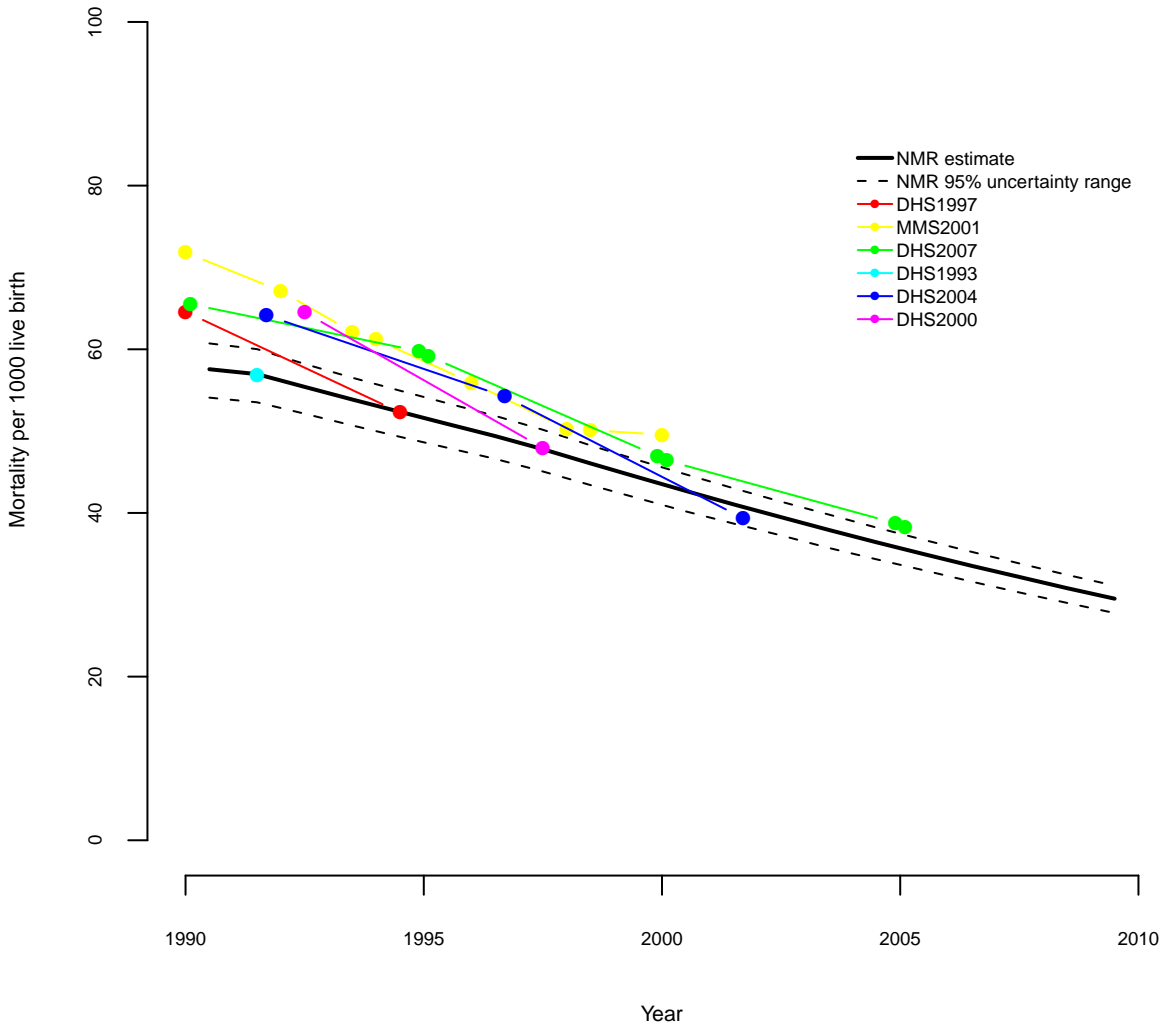

### Bangladesh NMR and U5MR

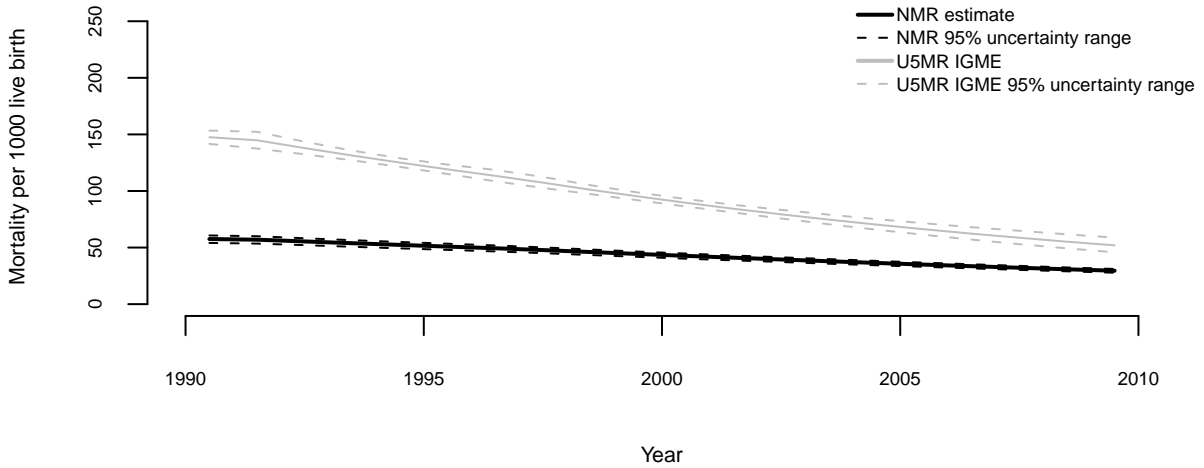

### Bangladesh NMR as percentage of U5MR

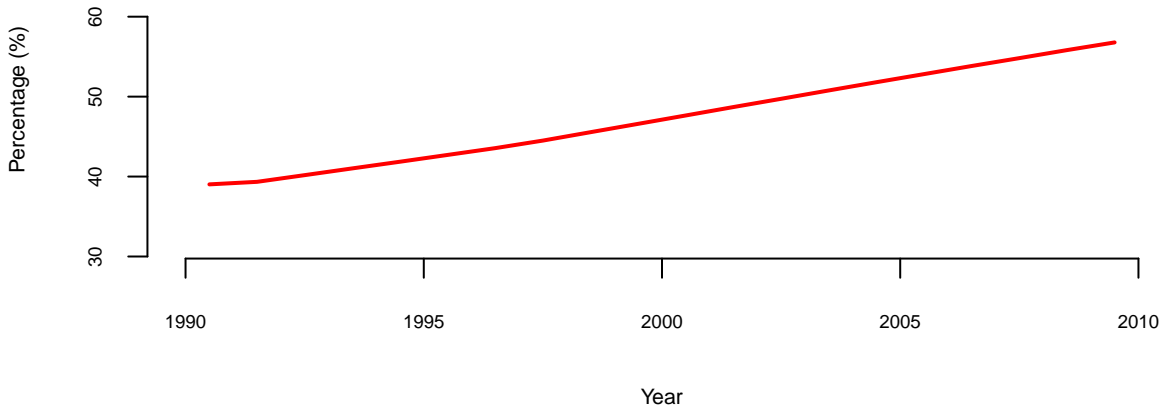

**Barbados**  
**Data, and estimated NMR**

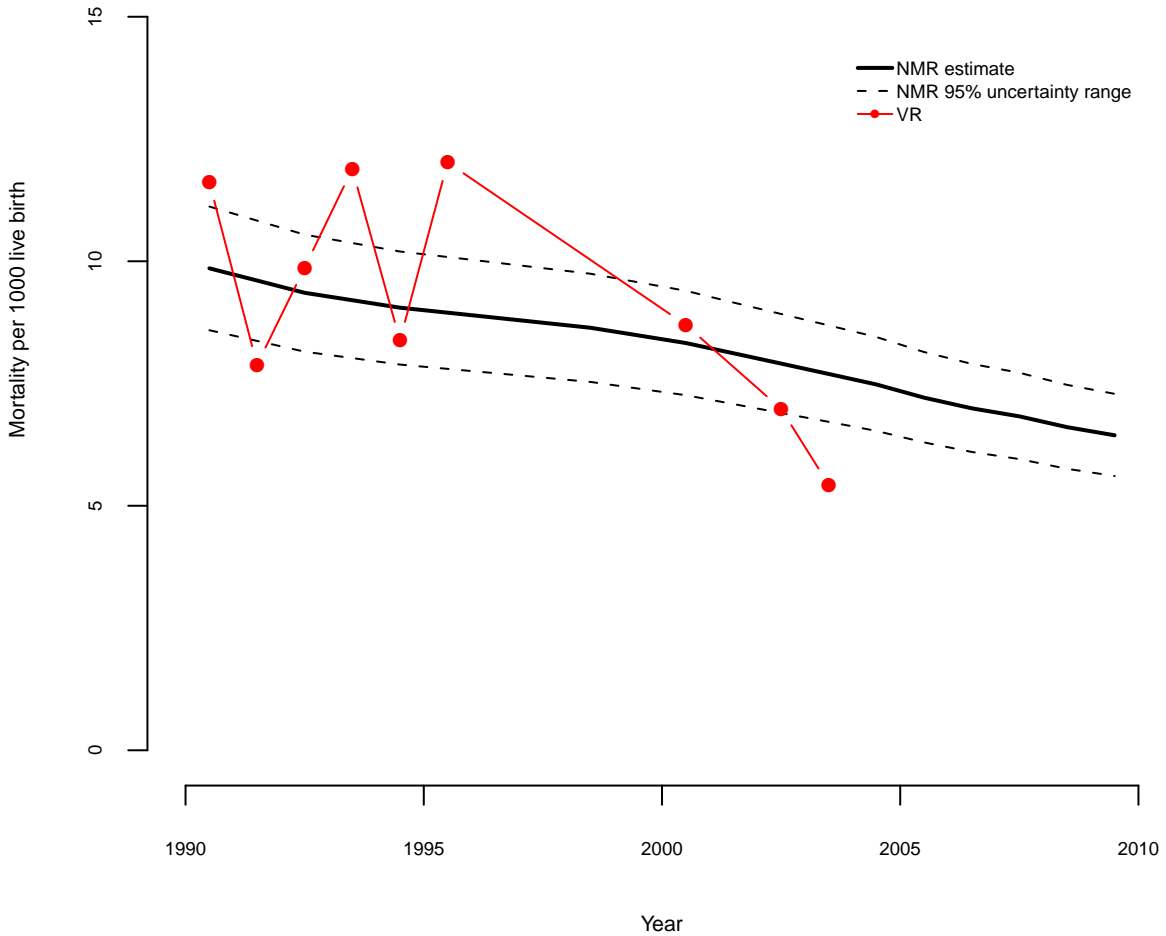

### Barbados NMR and U5MR

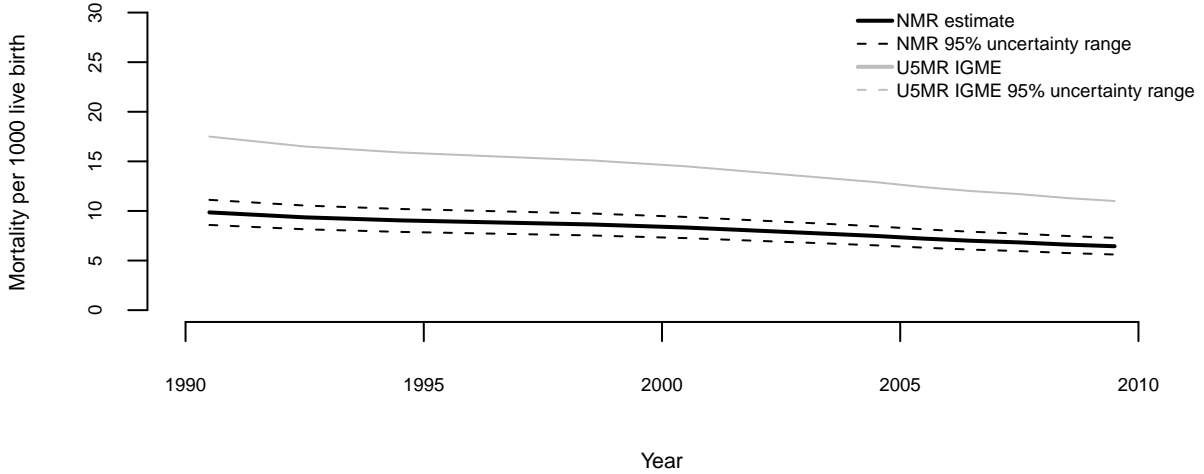

### Barbados NMR as percentage of U5MR

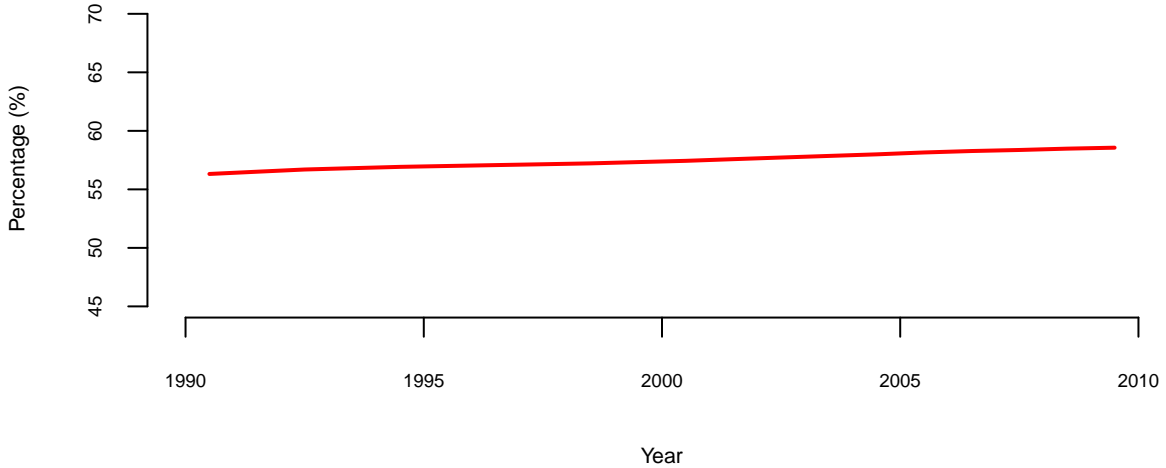

**Belarus**  
**Data, and estimated NMR**

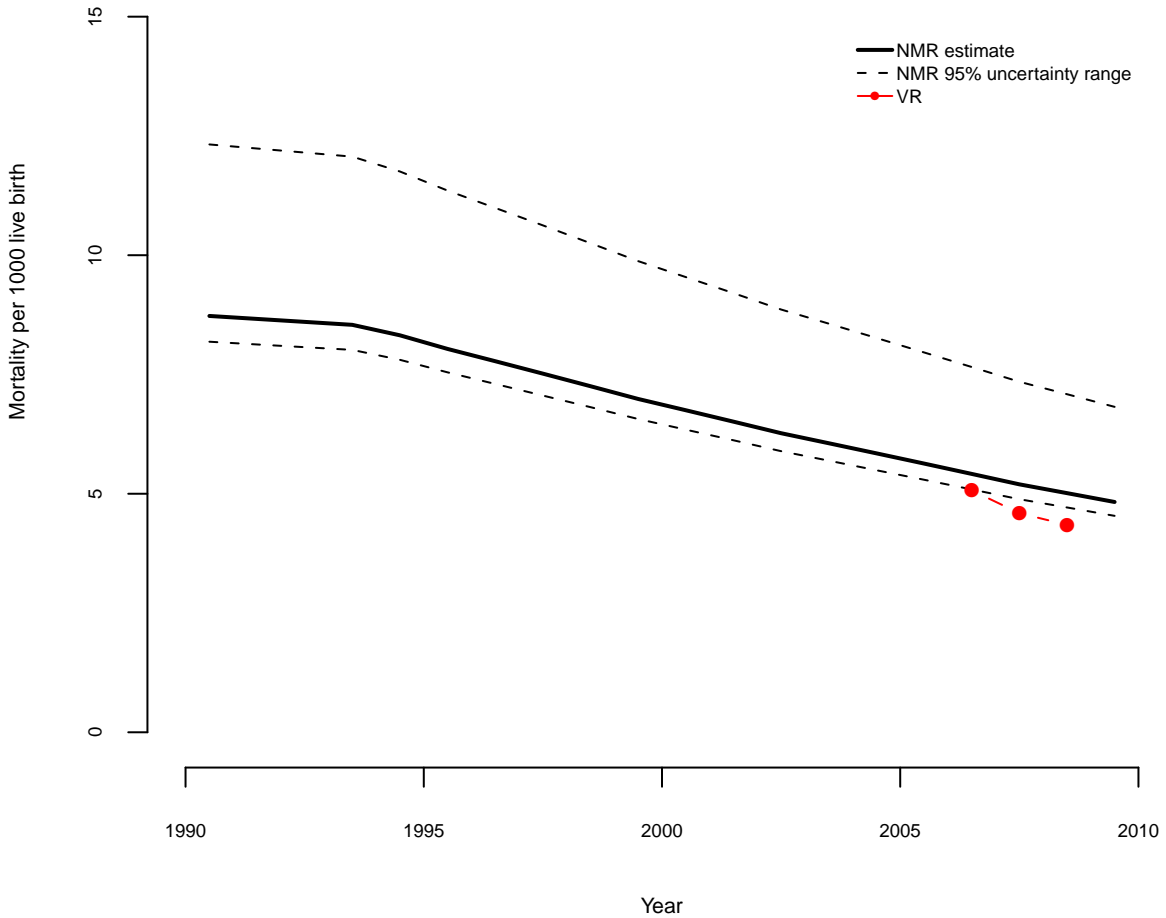

### Belarus NMR and U5MR

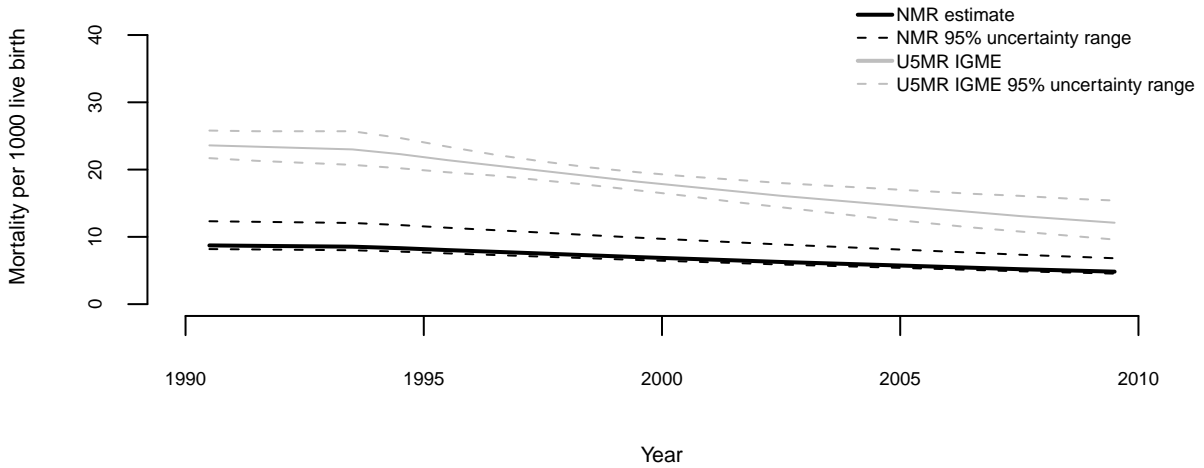

### Belarus NMR as percentage of U5MR

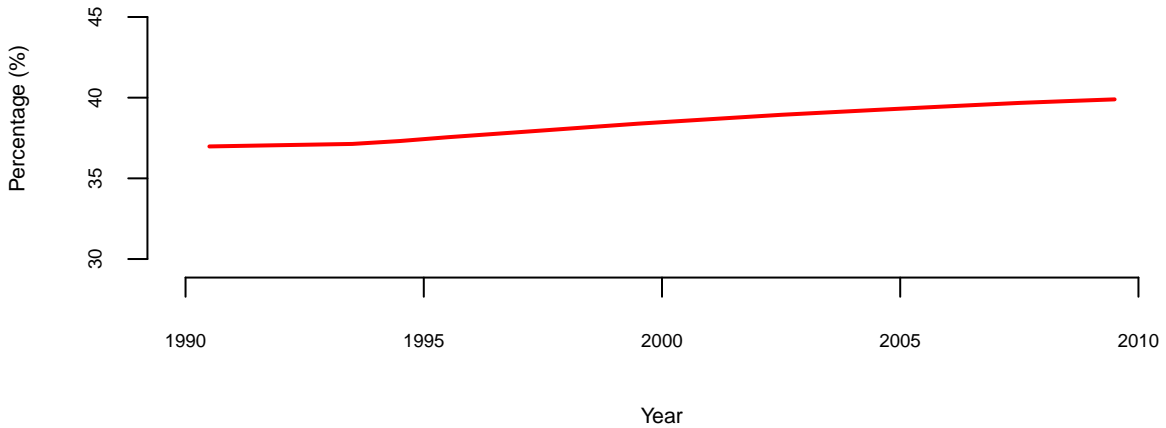



### Belgium Data, and estimated NMR

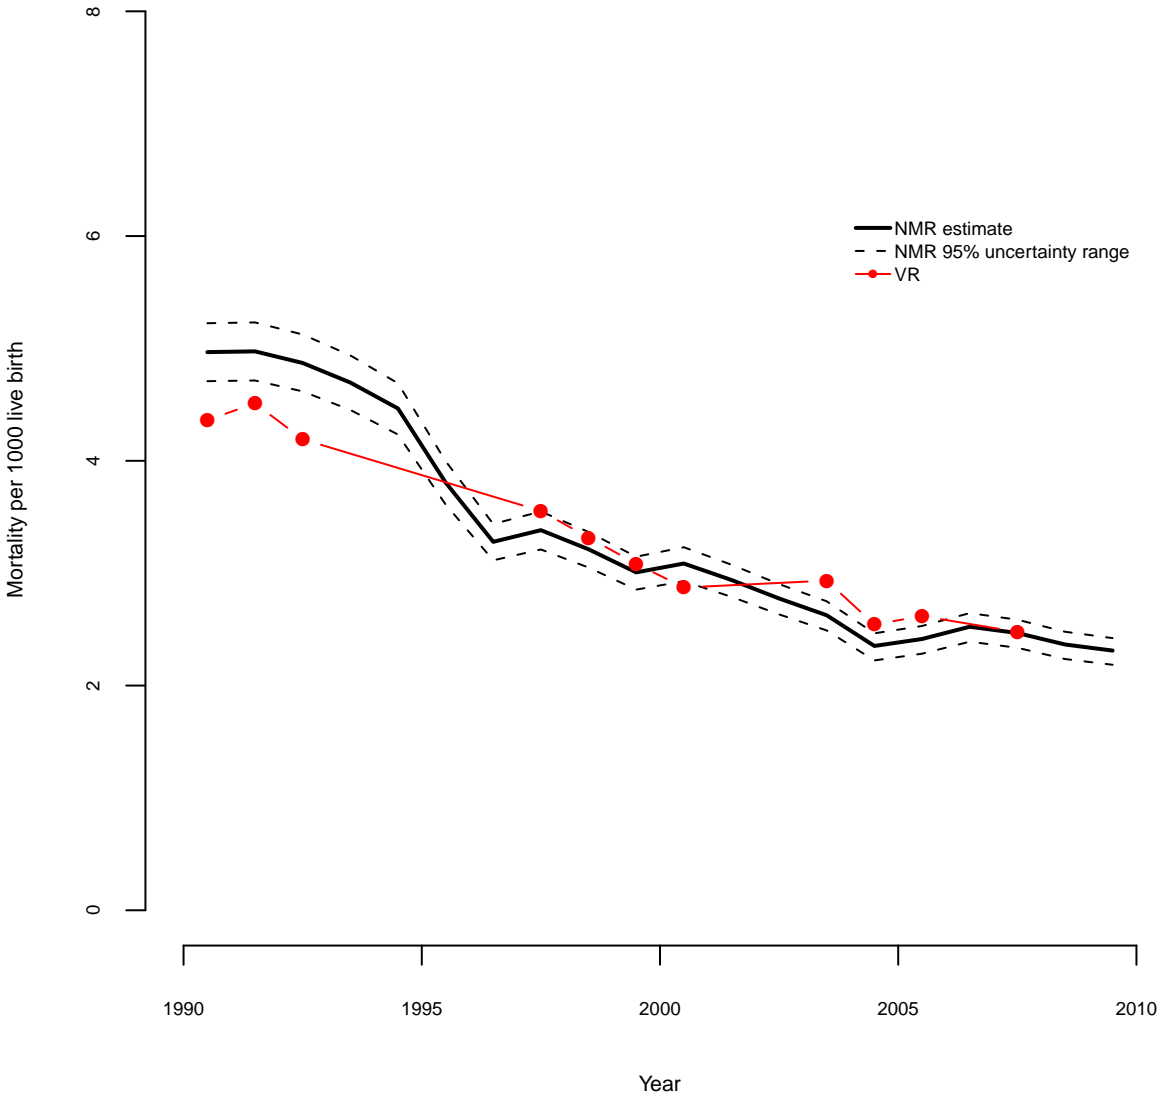

### Belgium NMR and U5MR

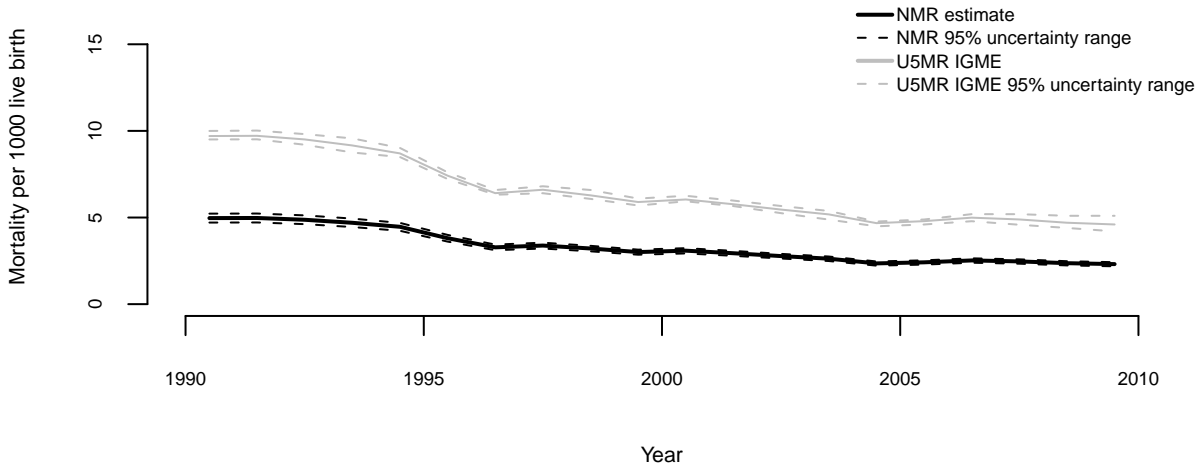

### Belgium NMR as percentage of U5MR

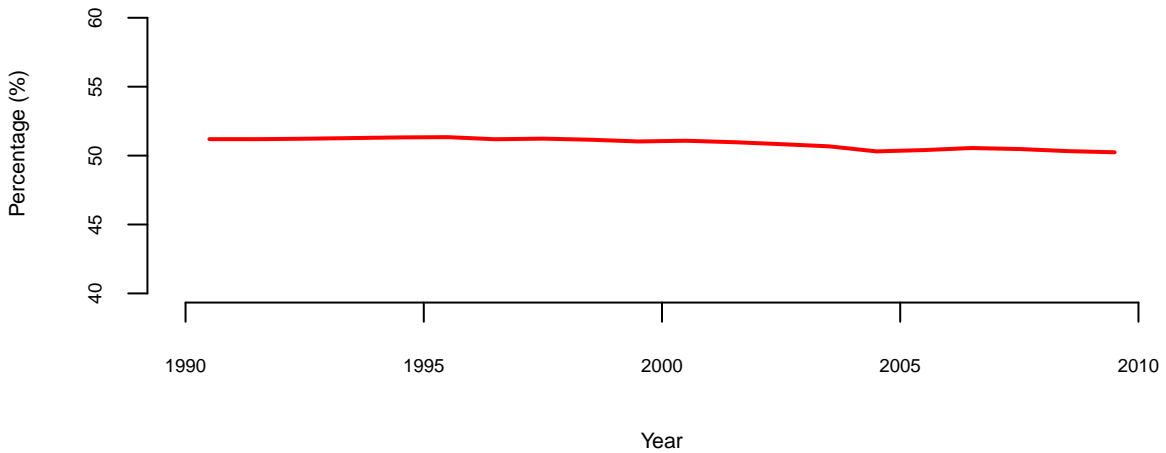

**Belize**  
**Data, and estimated NMR**

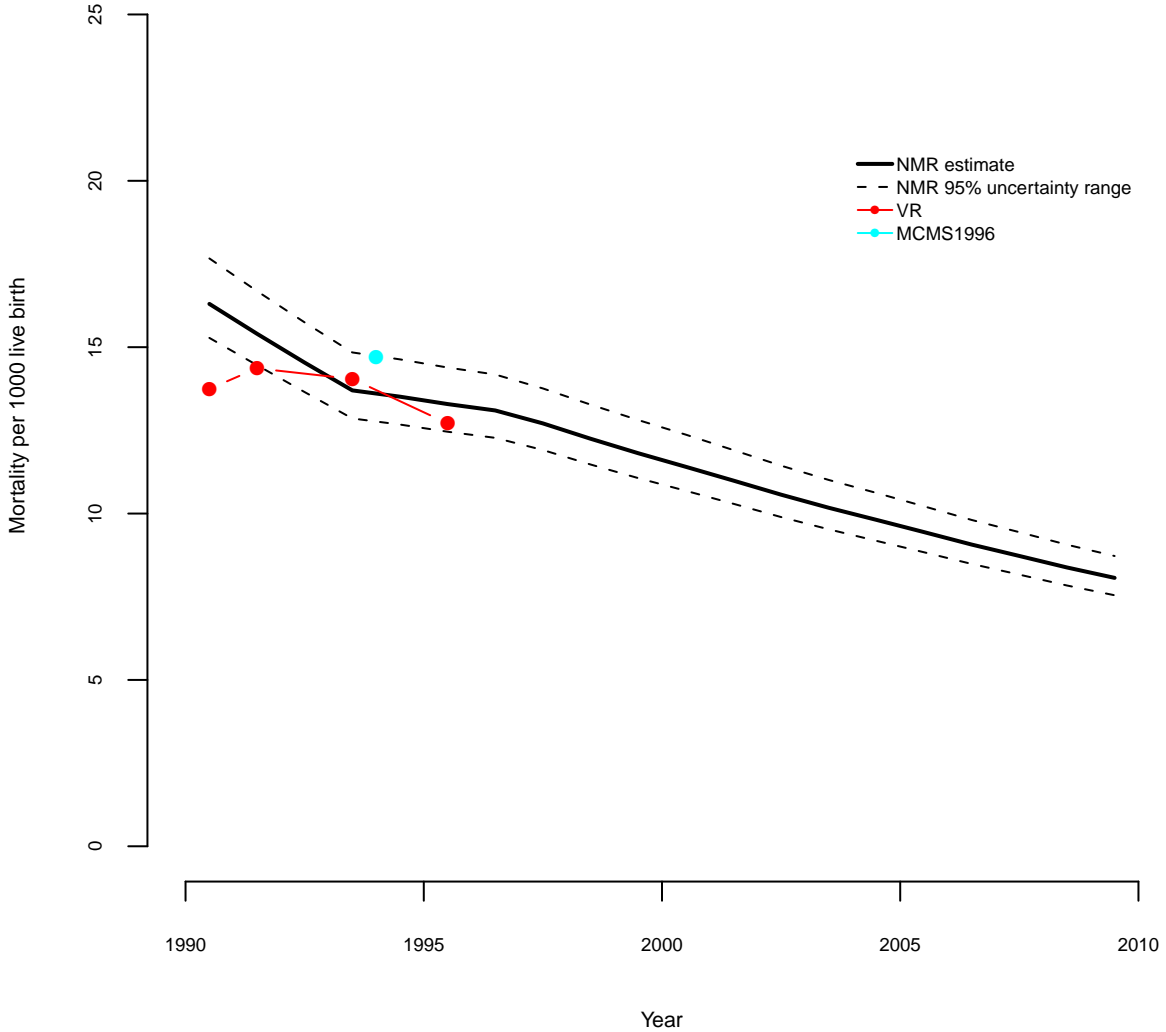

### Belize NMR and U5MR

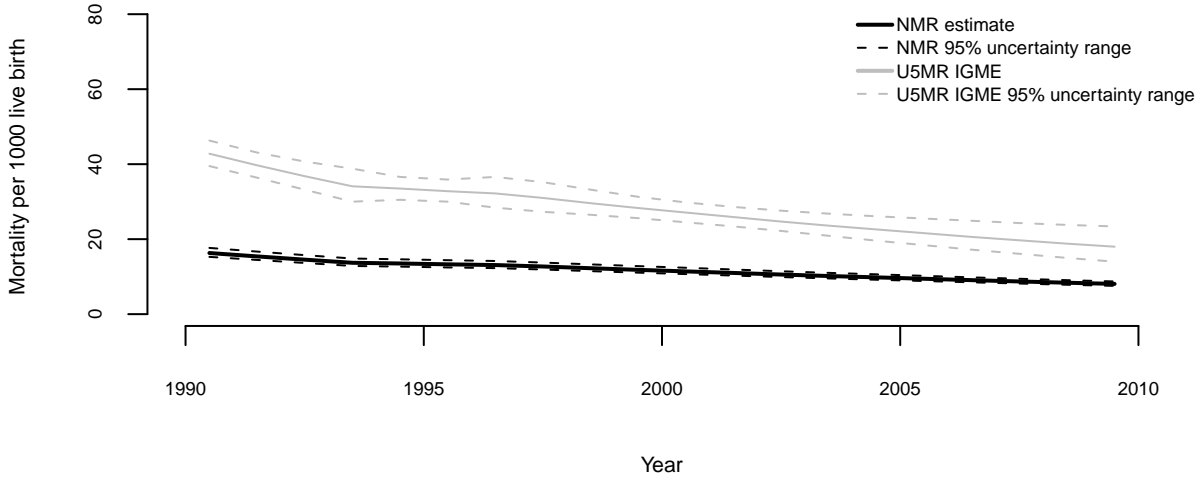

### Belize NMR as percentage of U5MR

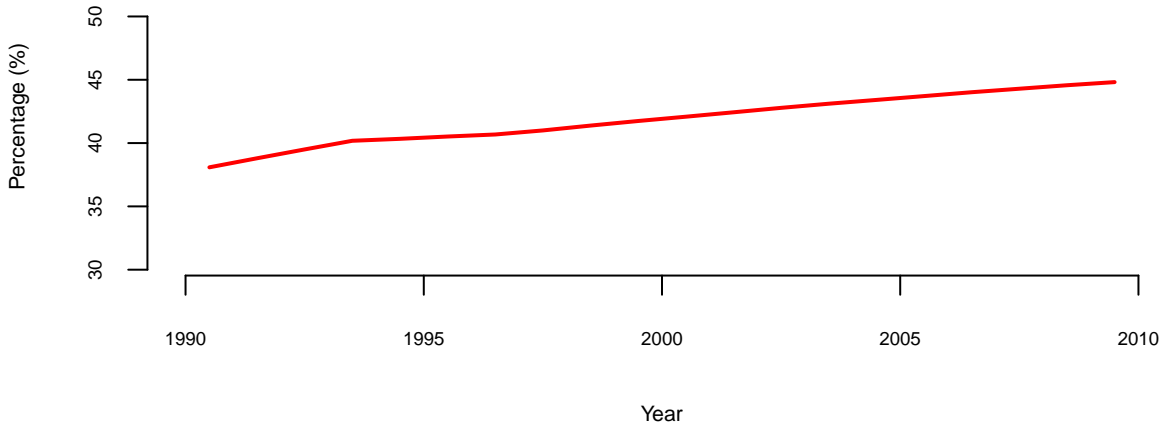

### Benin Data, and estimated NMR

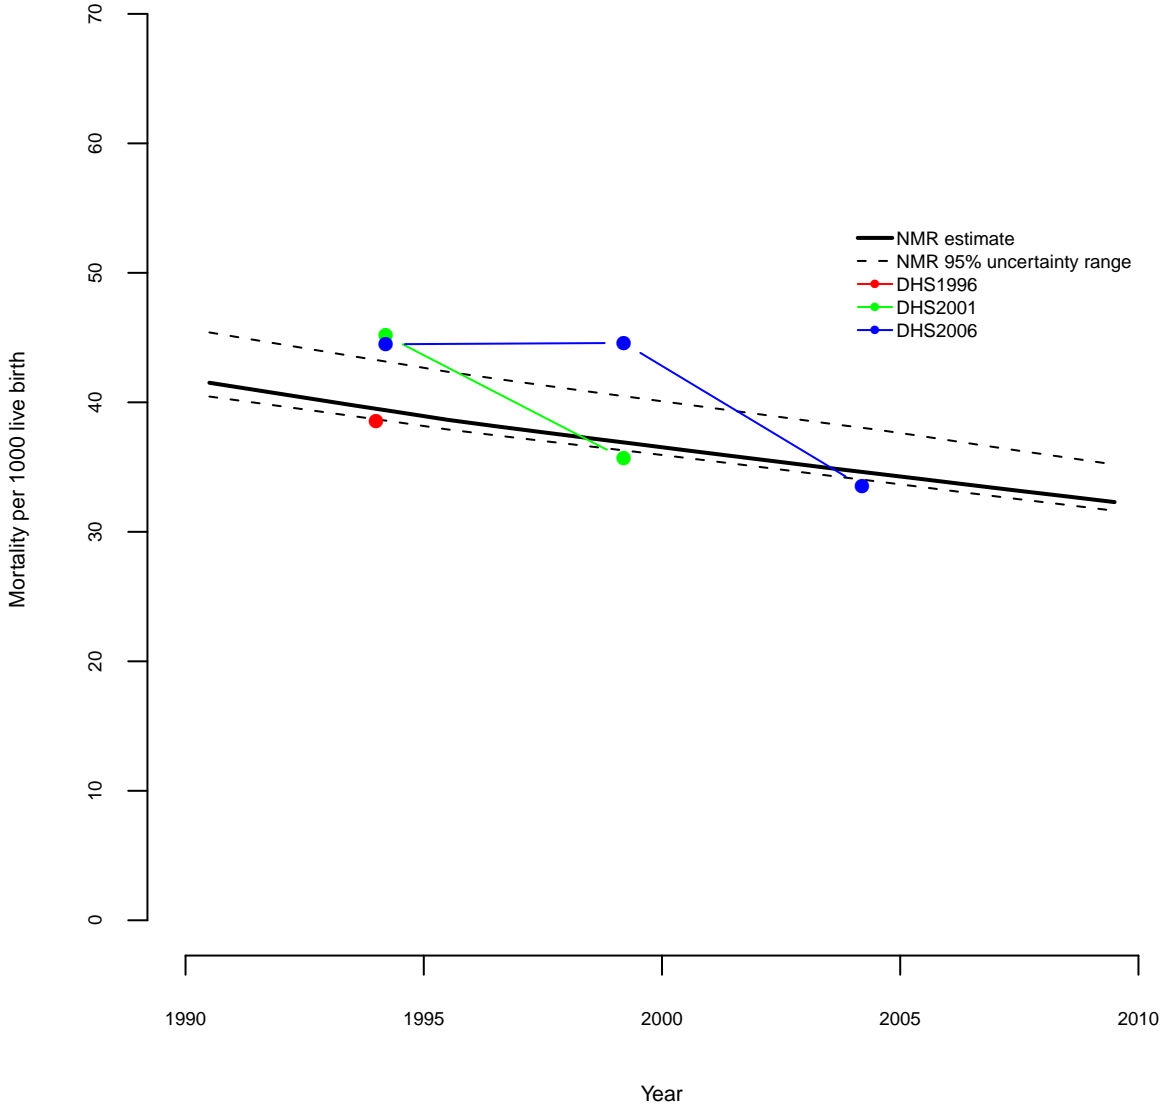

### Benin NMR and U5MR

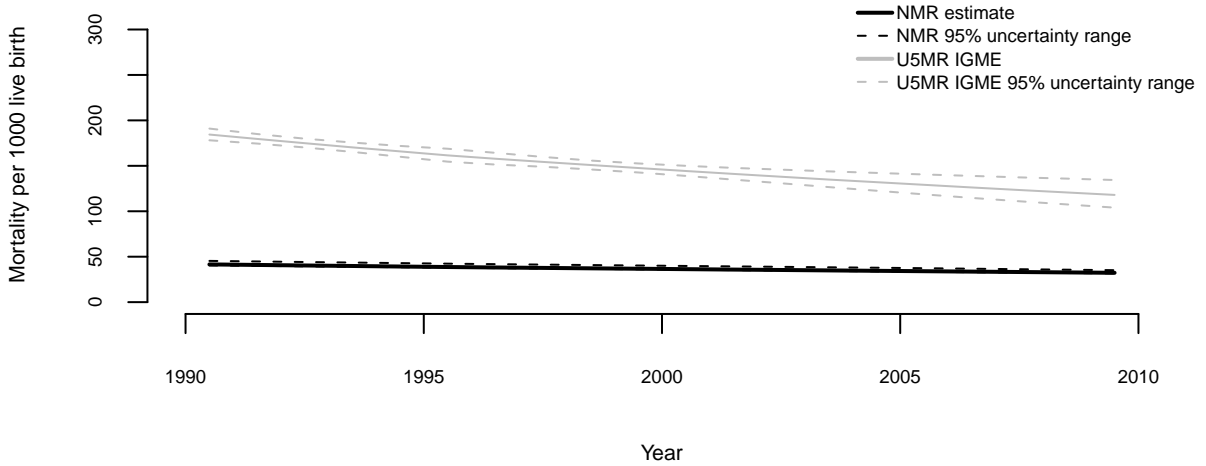

### Benin NMR as percentage of U5MR

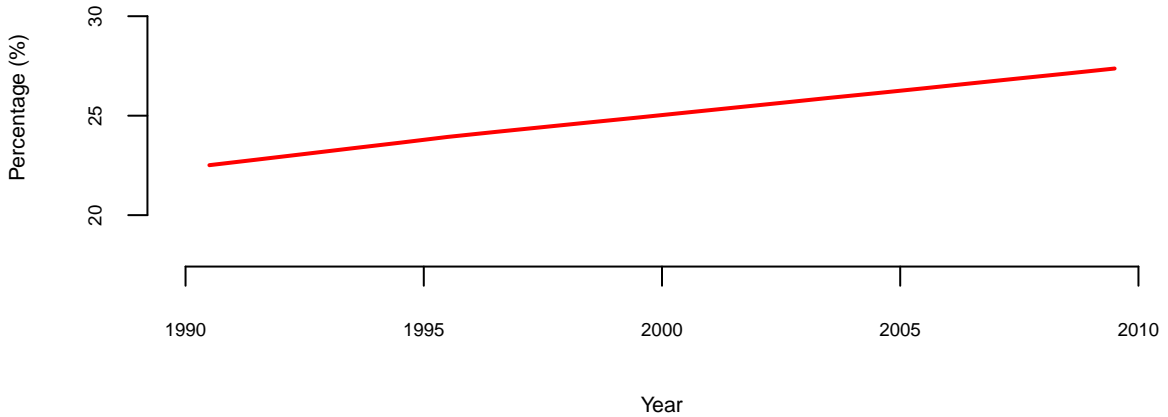

**Bhutan**  
**Data, and estimated NMR**

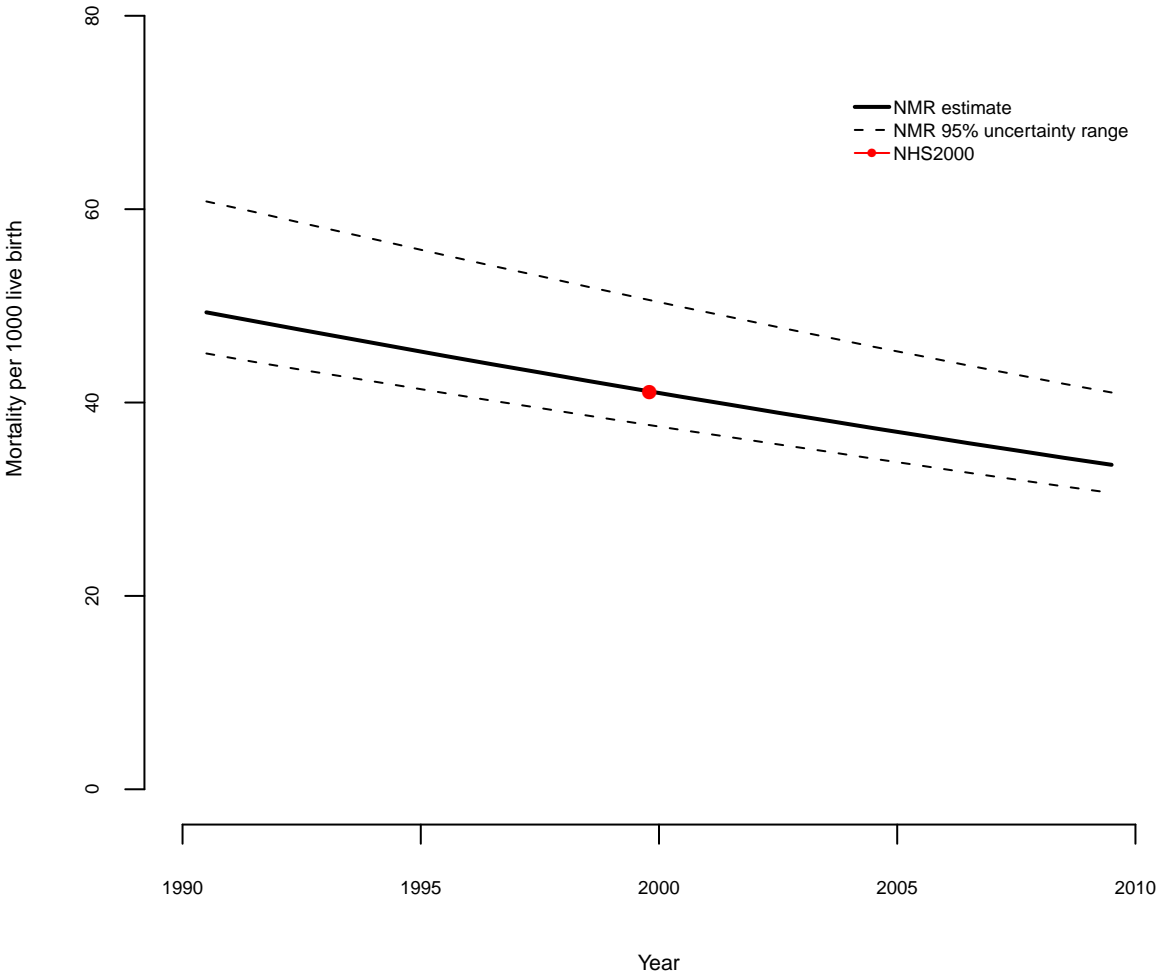

### Bhutan NMR and U5MR

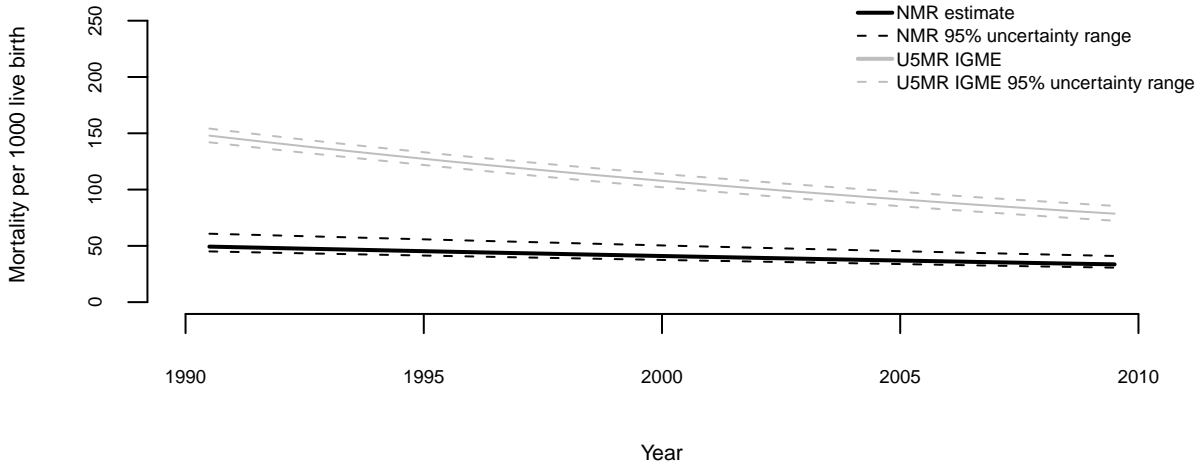

### Bhutan NMR as percentage of U5MR

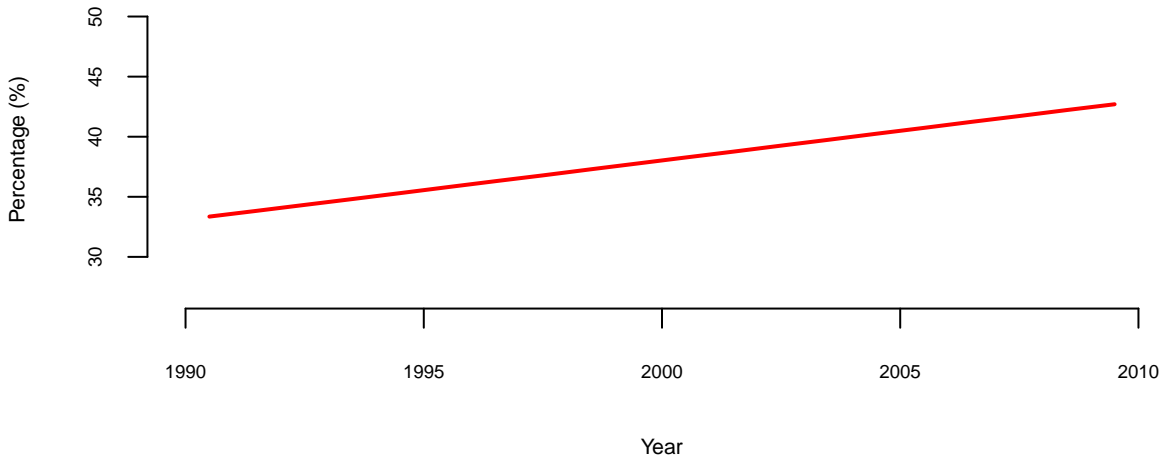



**Bolivia**  
**Data, and estimated NMR**

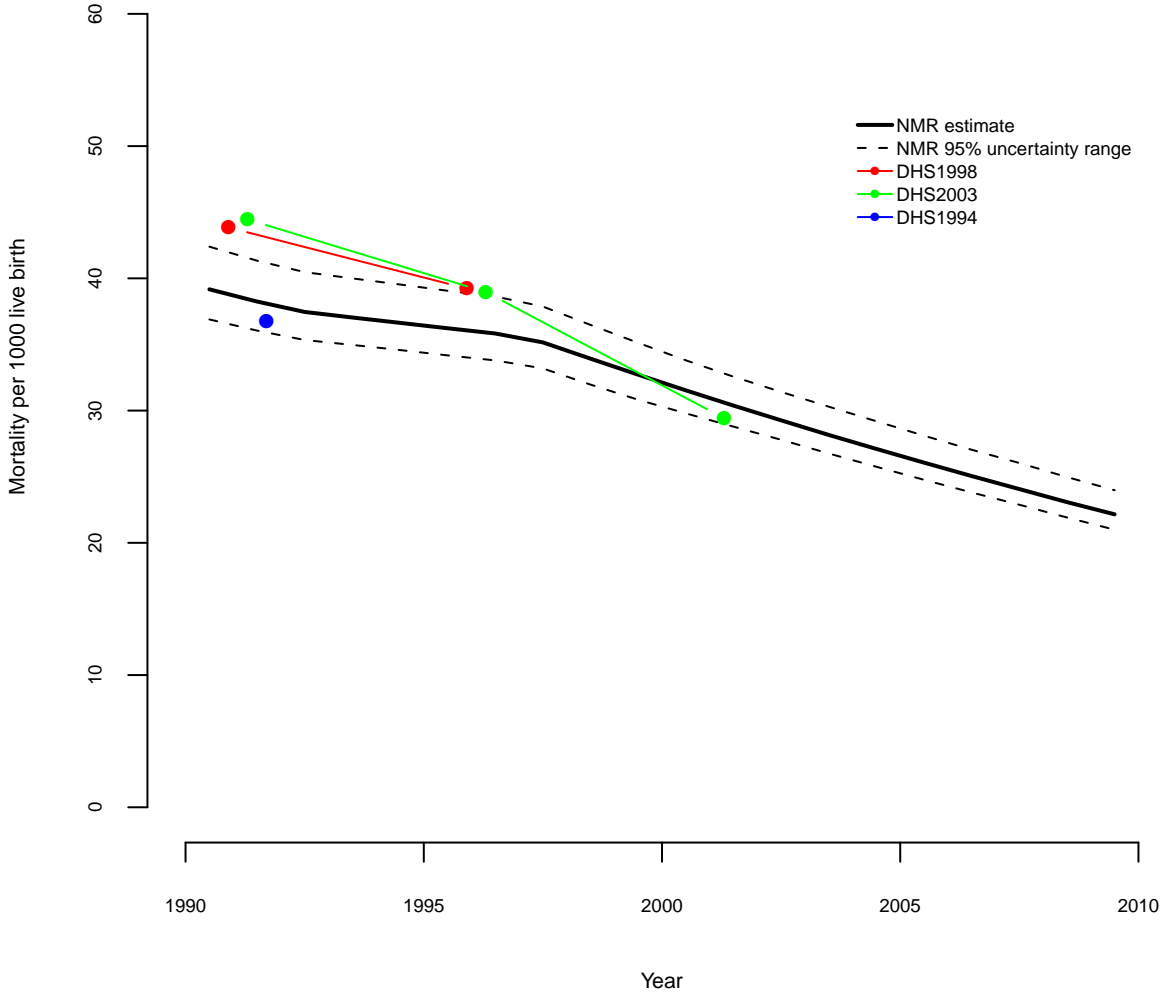

### Bolivia NMR and U5MR

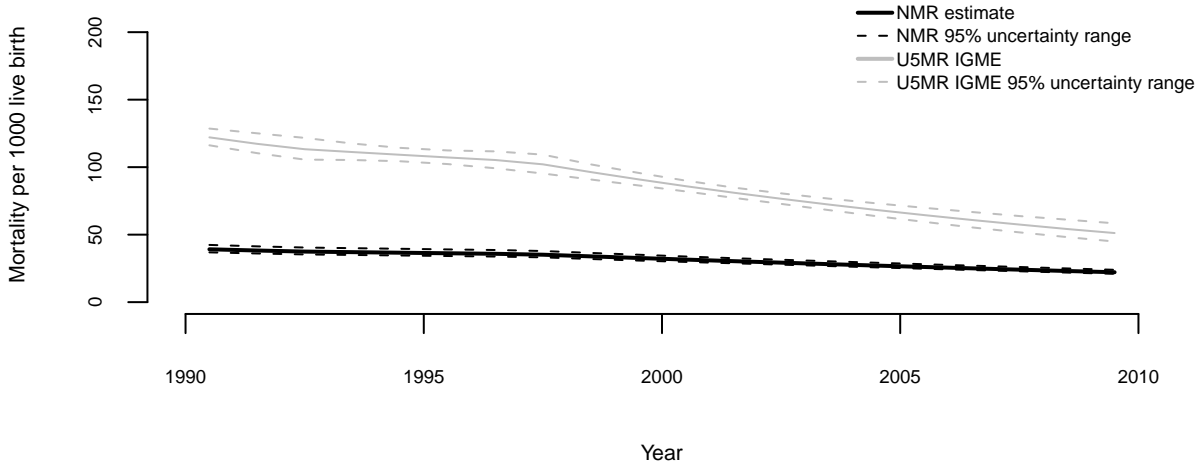

### Bolivia NMR as percentage of U5MR

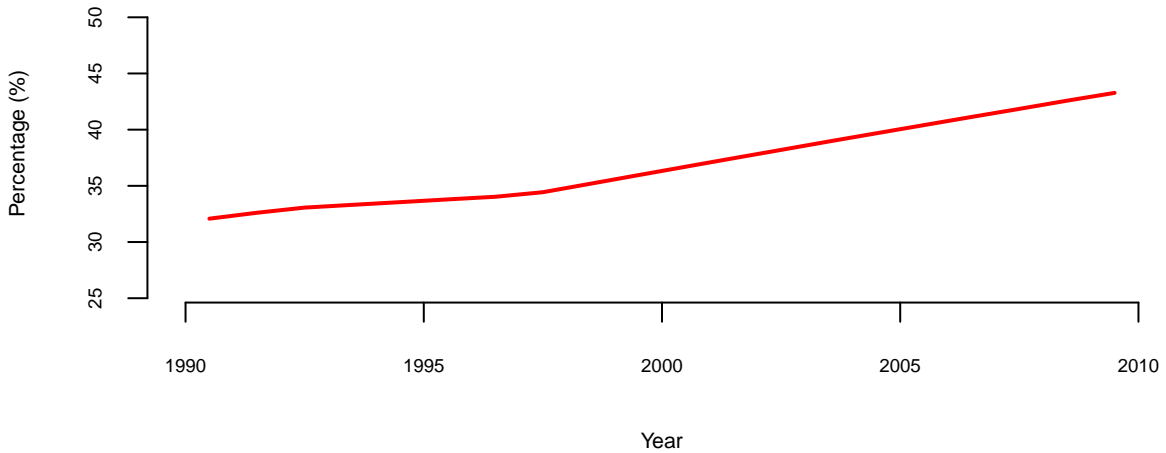

### Bosnia and Herzegovina Data, and estimated NMR

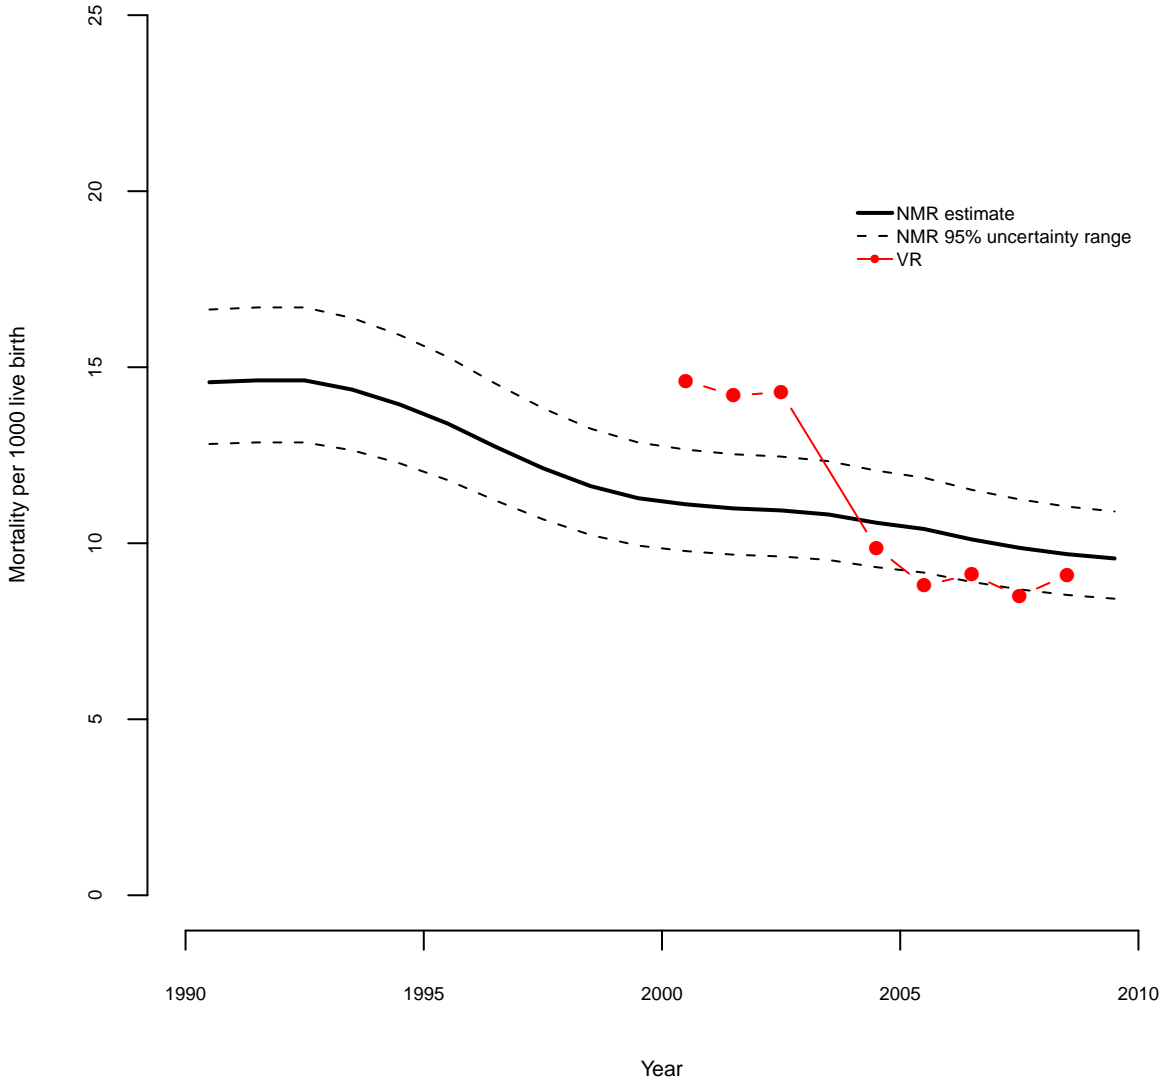

### Bosnia and Herzegovina NMR and U5MR

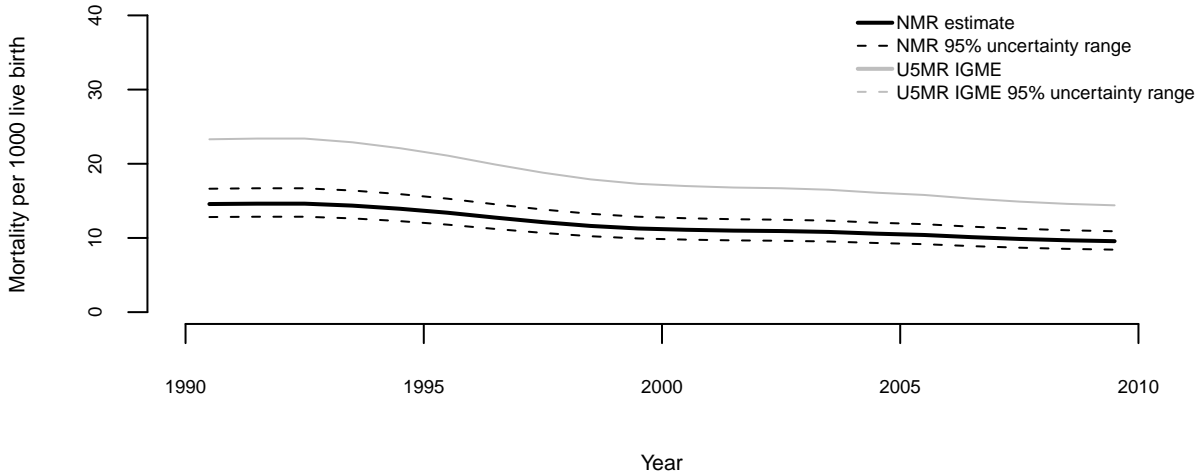

### Bosnia and Herzegovina NMR as percentage of U5MR

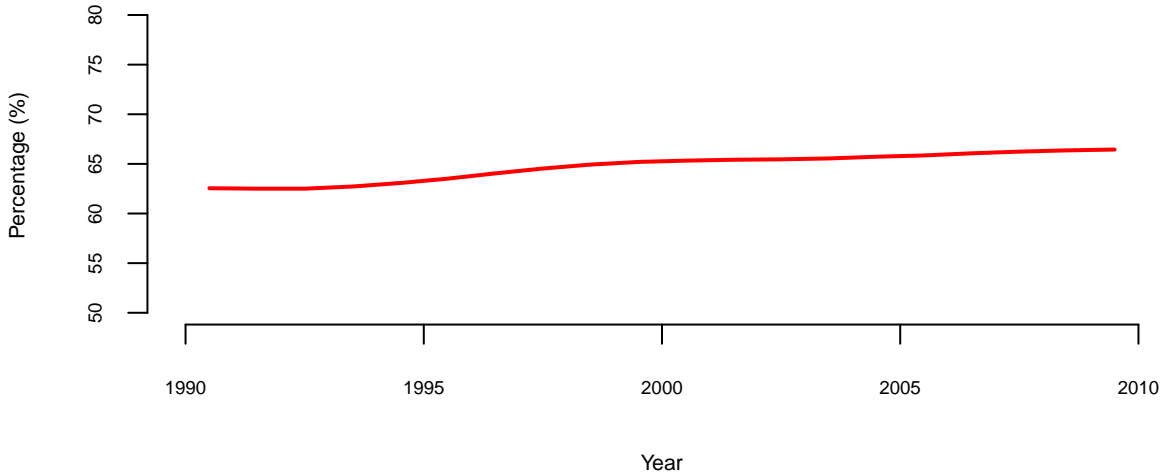

**Botswana**  
**Data, and estimated NMR**

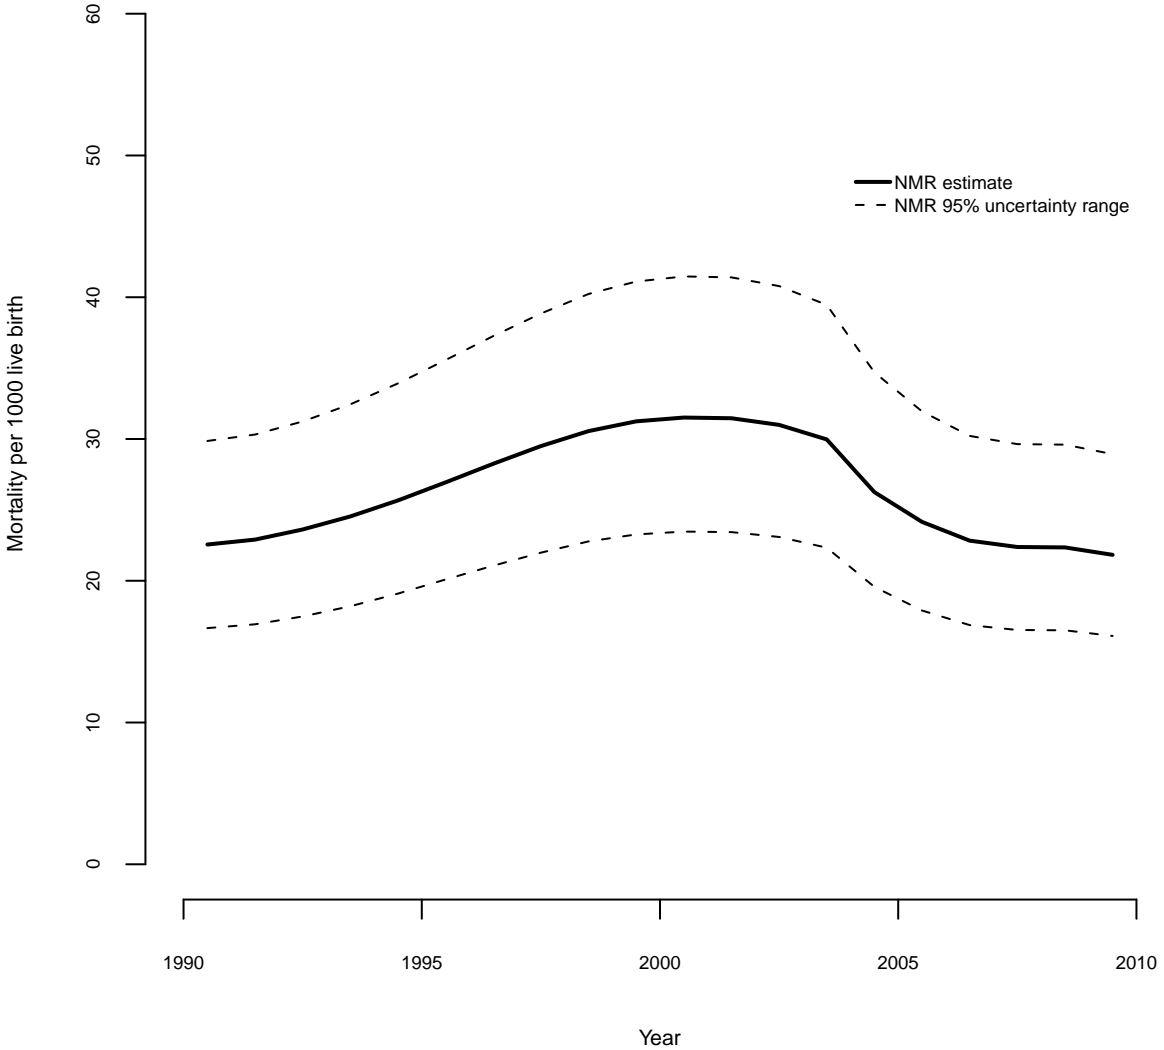

### Botswana NMR and U5MR

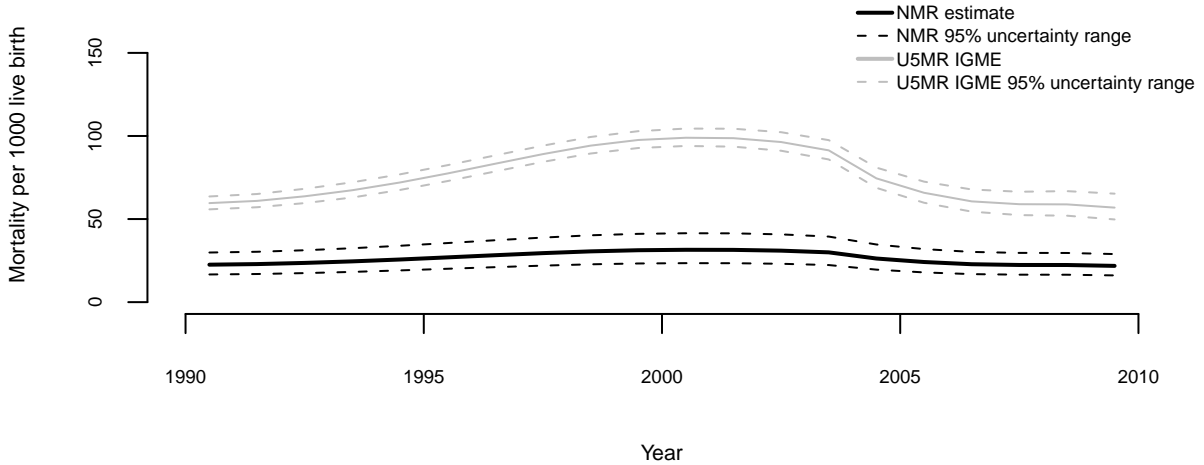

### Botswana NMR as percentage of U5MR

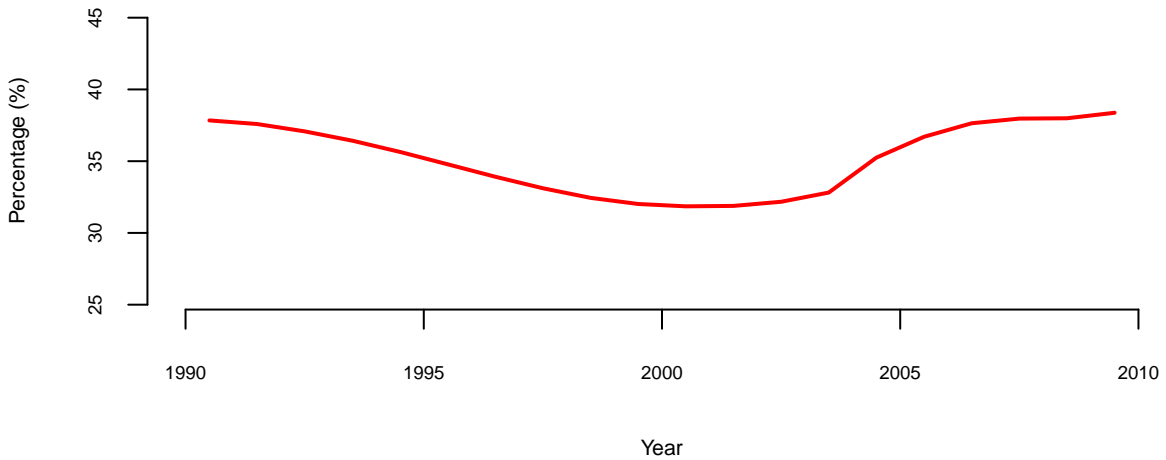

# Brazil

## Data, and estimated NMR

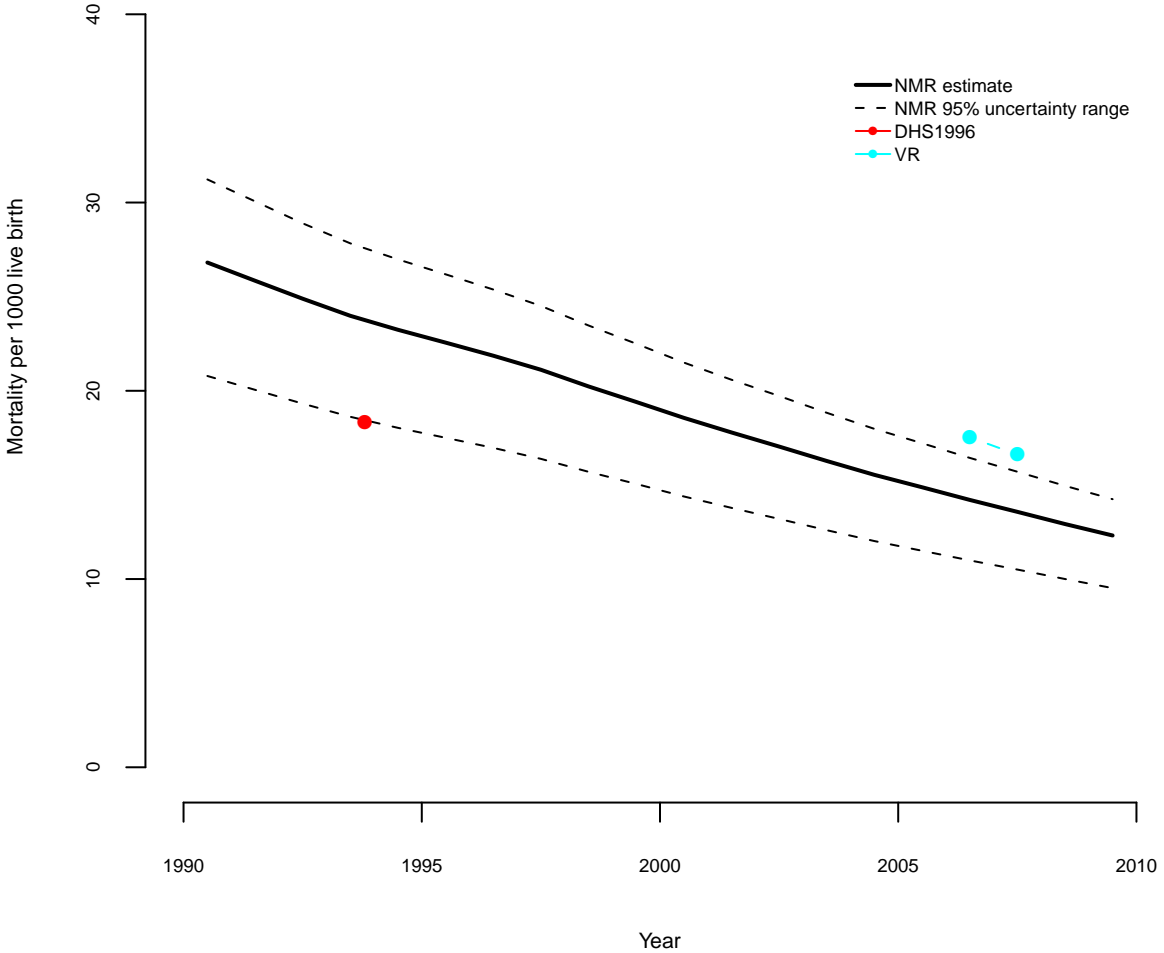

### Brazil NMR and U5MR

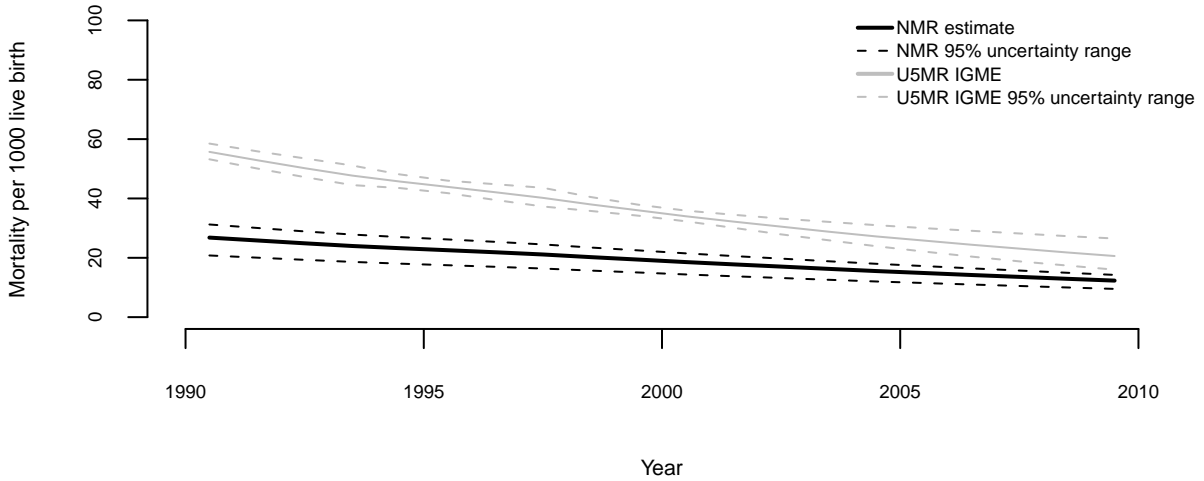

### Brazil NMR as percentage of U5MR

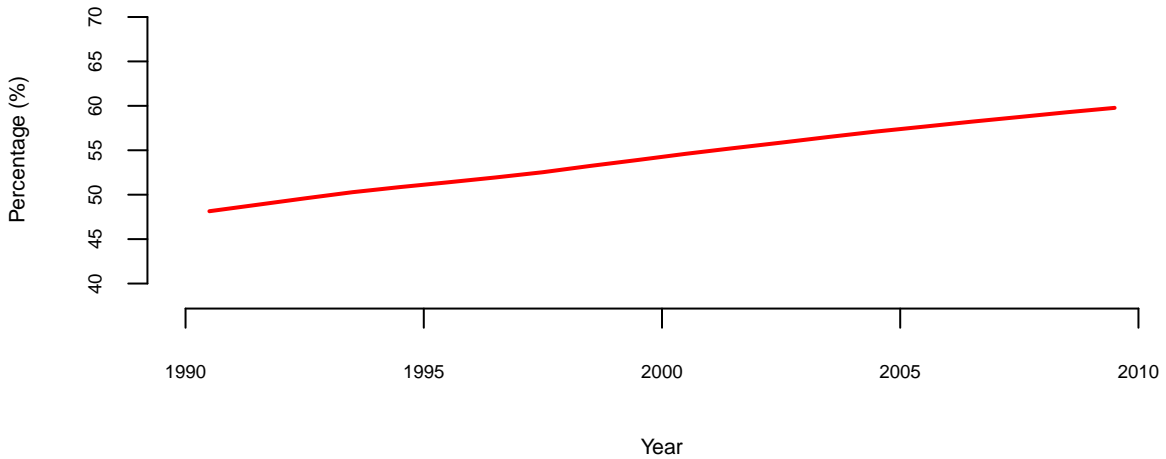



**Brunei Darussalam**  
**Data, and estimated NMR**

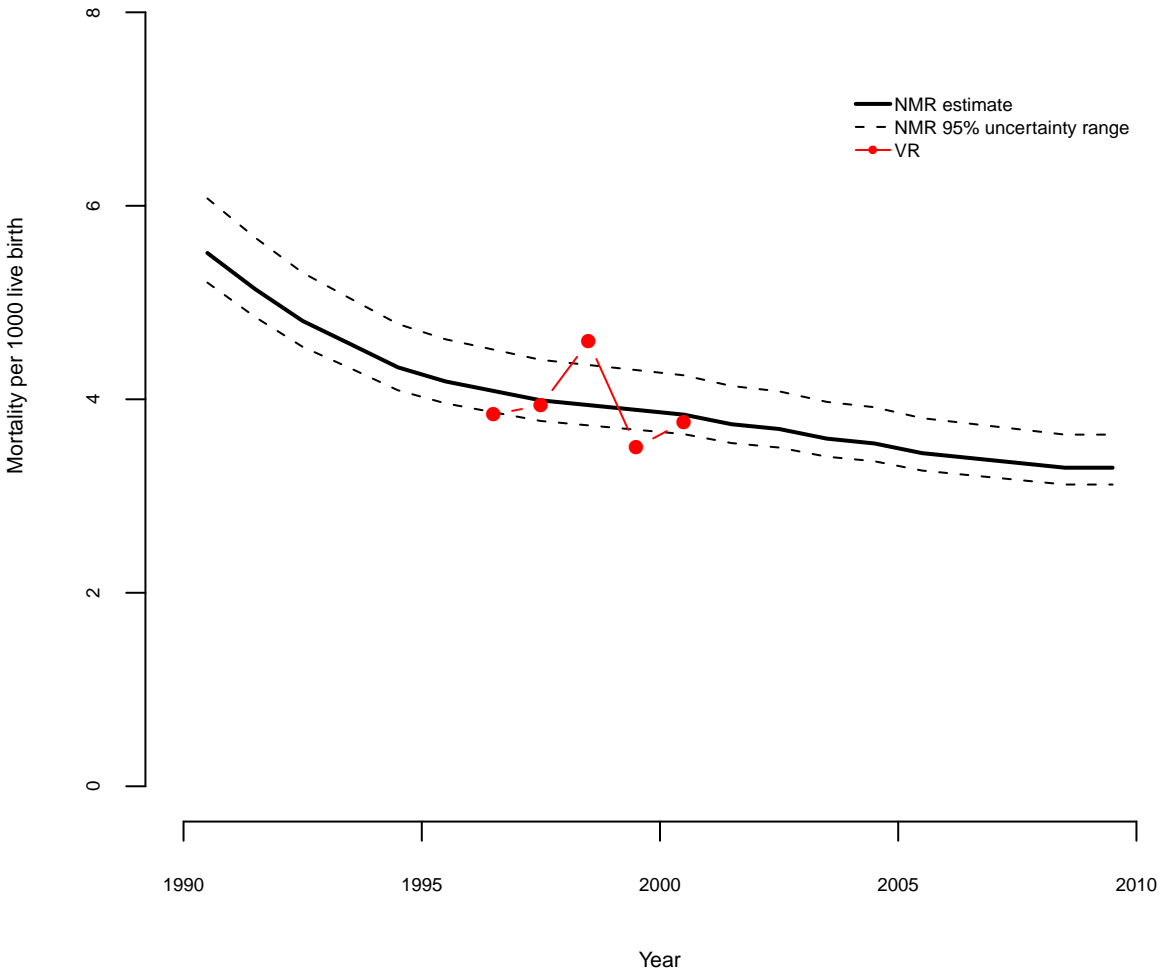

### Brunei Darussalam NMR and U5MR

- NMR estimate
- - NMR 95% uncertainty range
- U5MR IGME
- - U5MR IGME 95% uncertainty range

Mortality per 1000 live birth

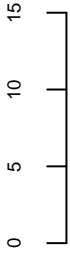

1990 1995 2000 2005 2010

Year

### Brunei Darussalam NMR as percentage of U5MR

Percentage (%)

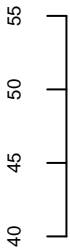

1990 1995 2000 2005 2010

Year

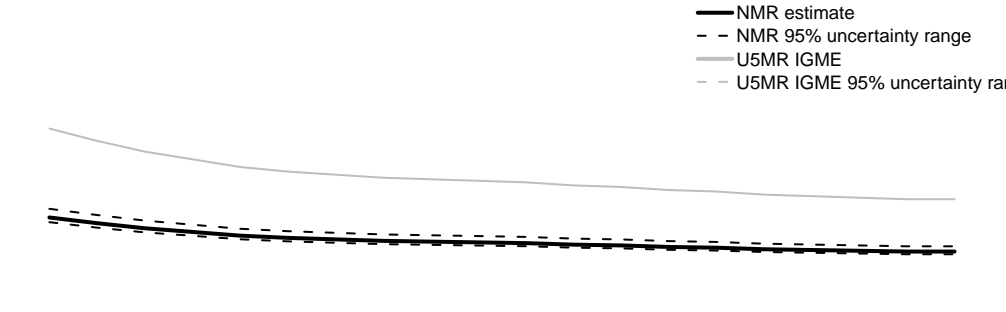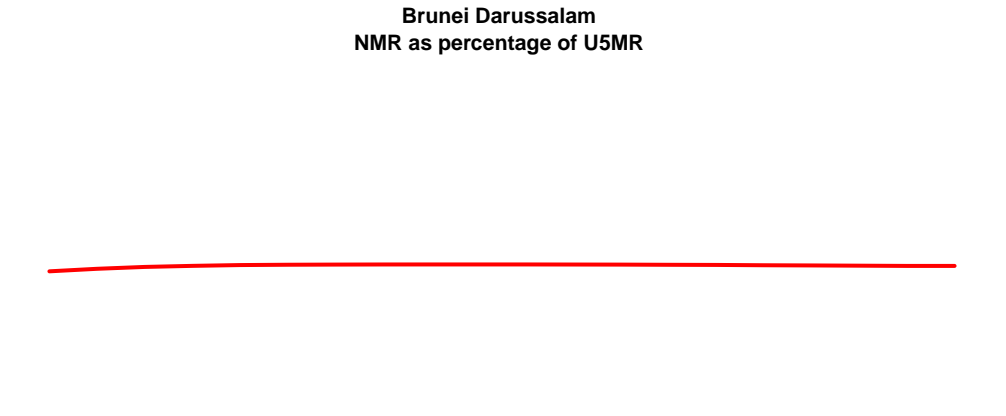

# Bulgaria

## Data, and estimated NMR

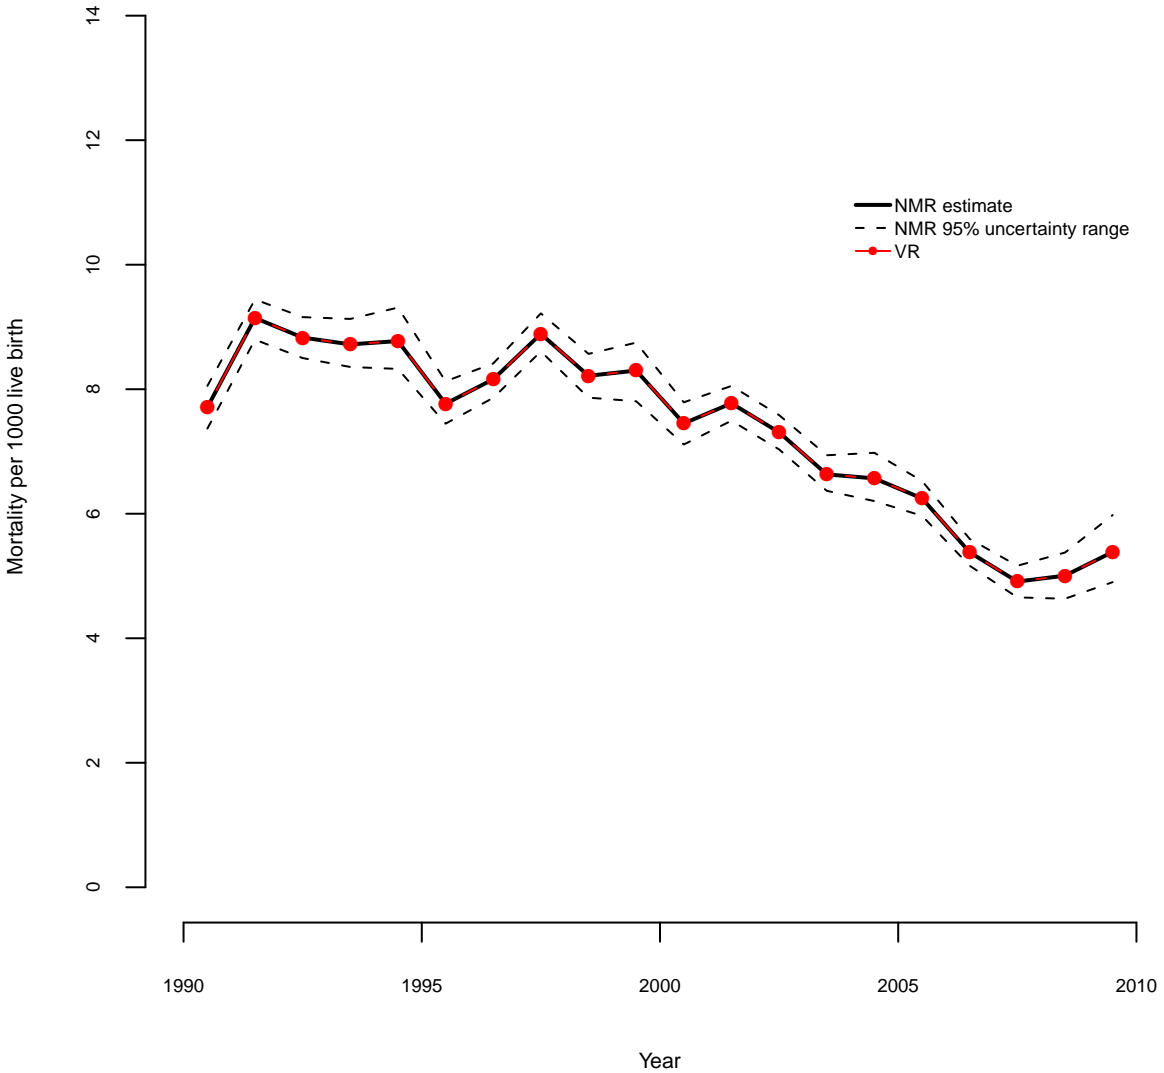

### Bulgaria NMR and U5MR

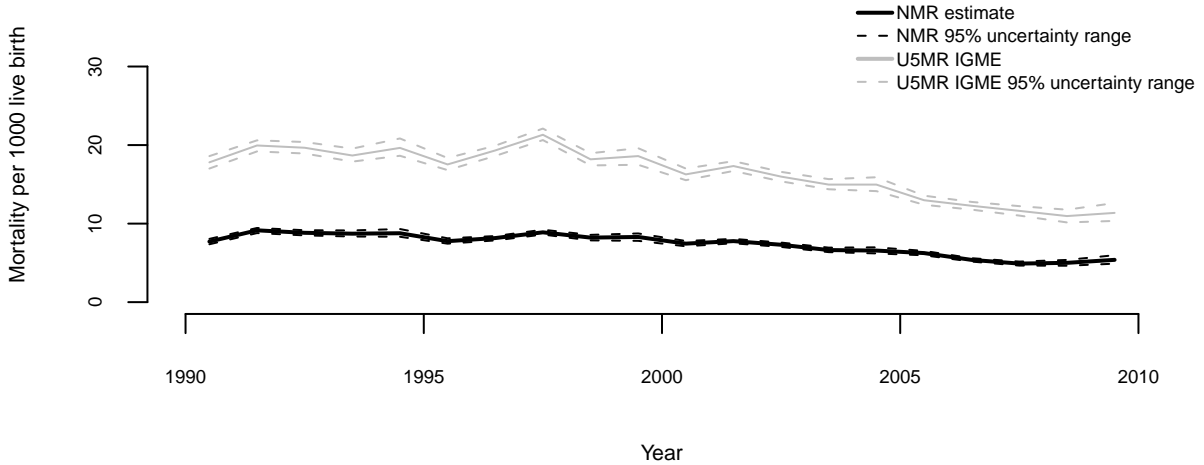

### Bulgaria NMR as percentage of U5MR

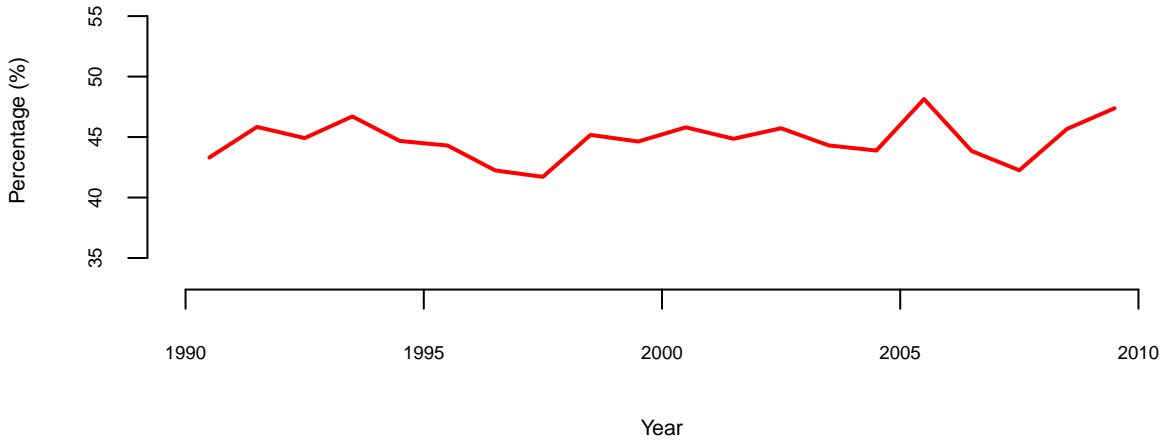

### Burkina Faso Data, and estimated NMR

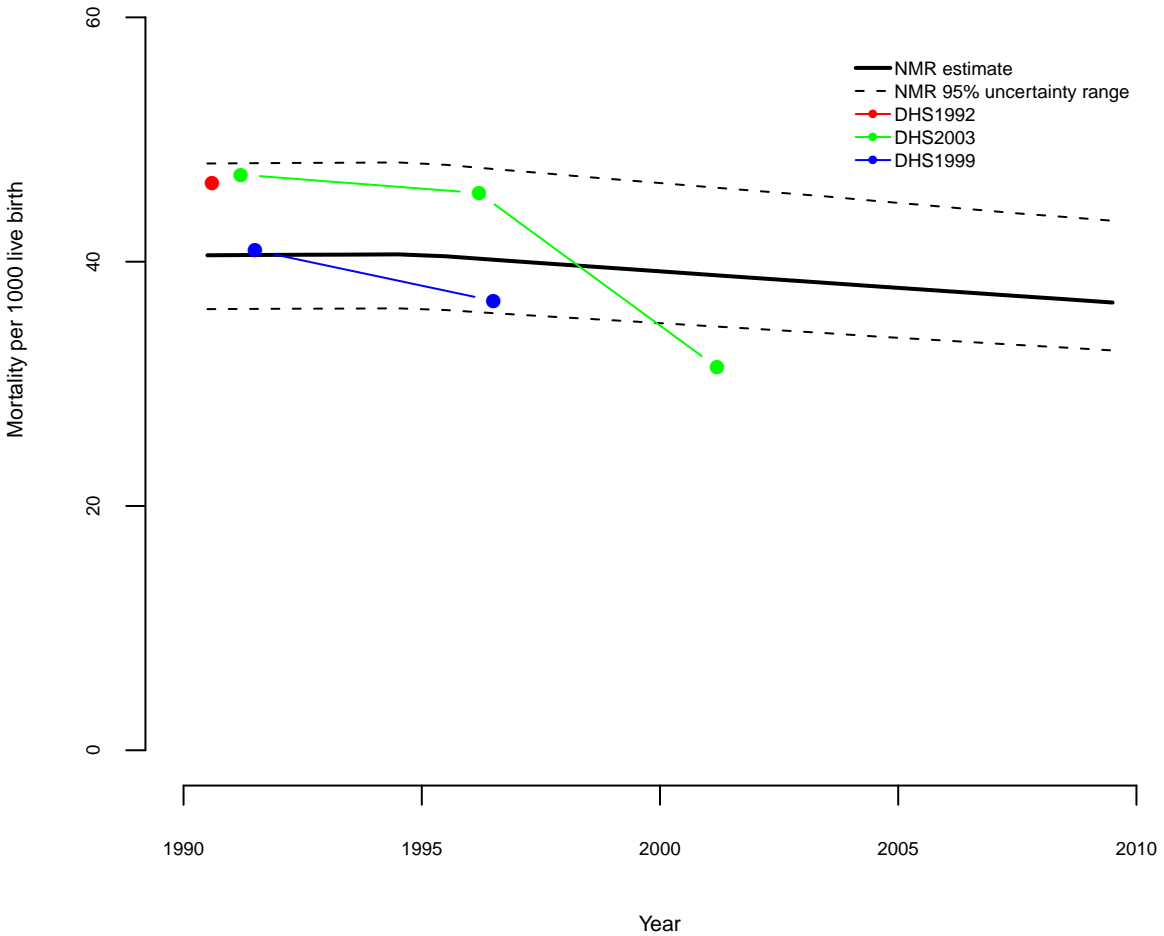

### Burkina Faso NMR and U5MR

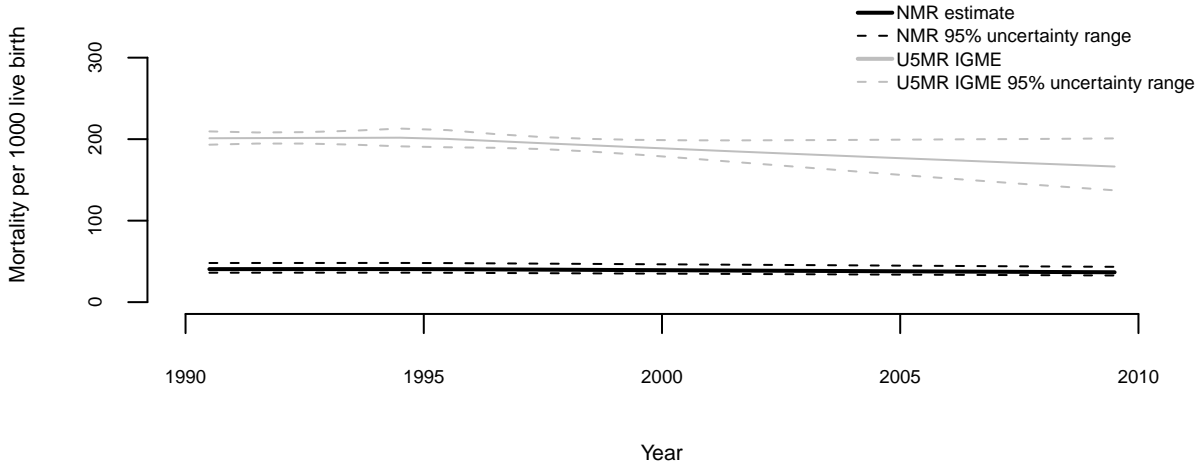

### Burkina Faso NMR as percentage of U5MR

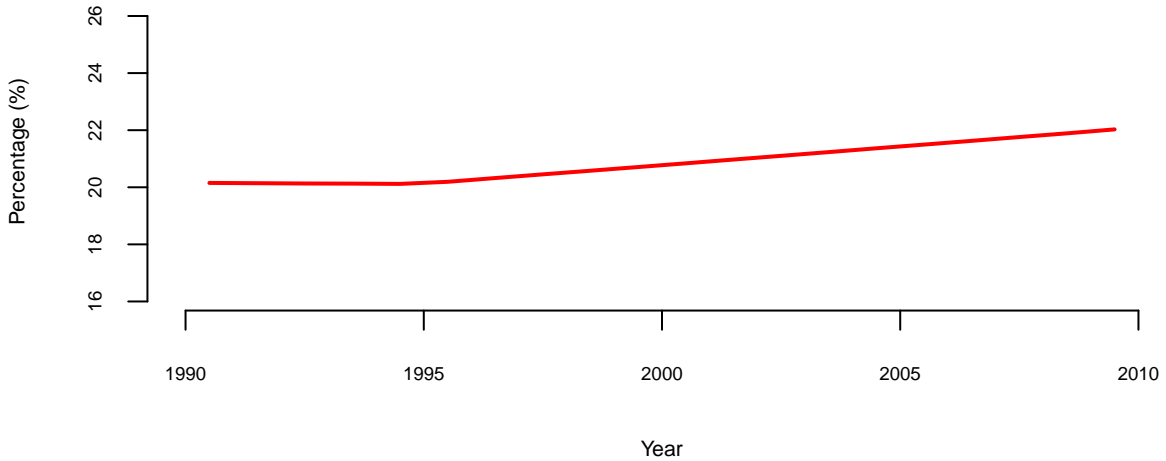

**Burundi**  
**Data, and estimated NMR**

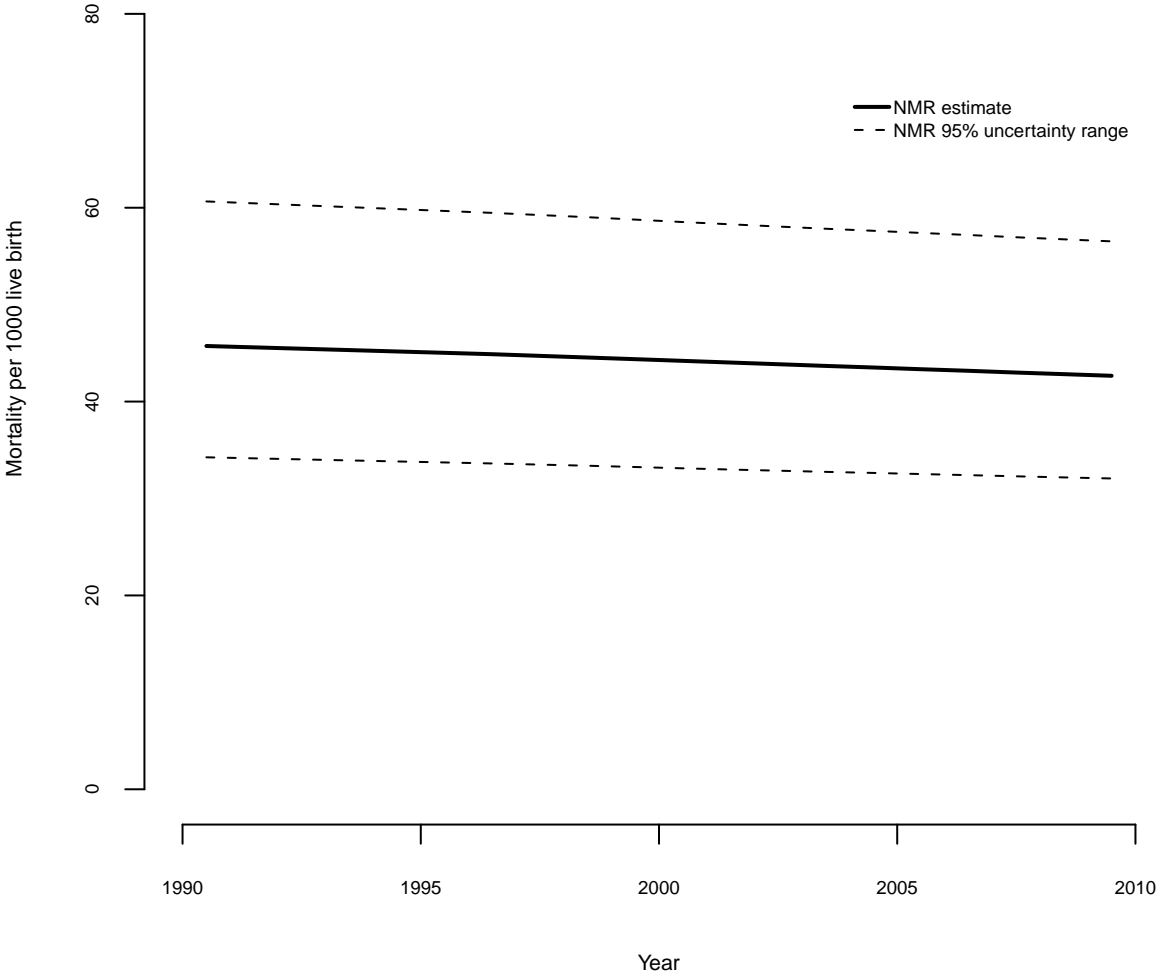

### Burundi NMR and U5MR

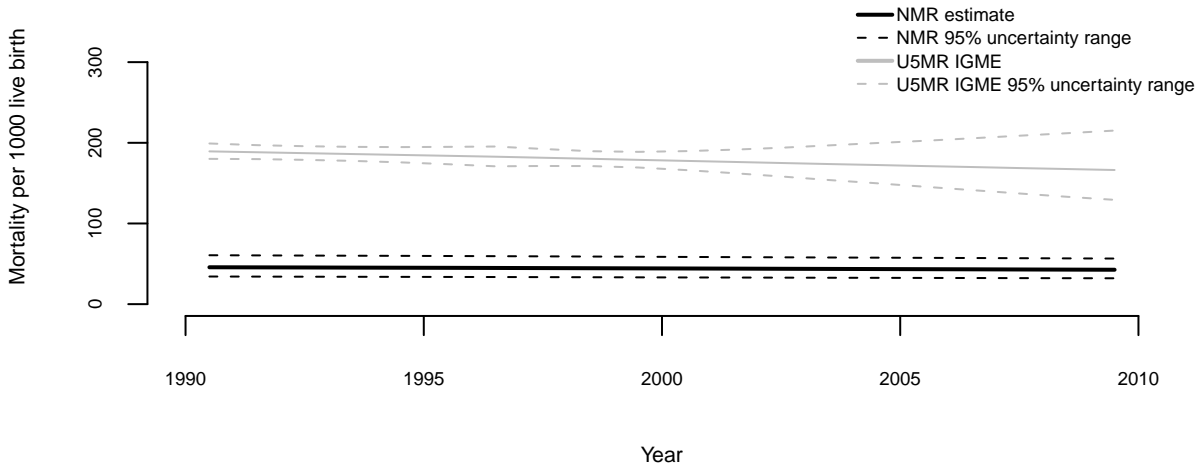

### Burundi NMR as percentage of U5MR

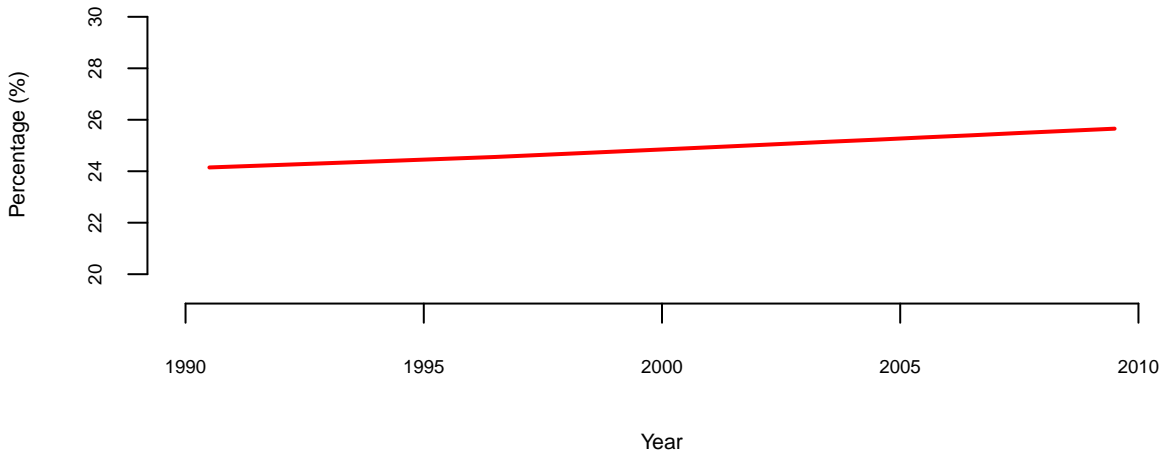



### Cambodia Data, and estimated NMR

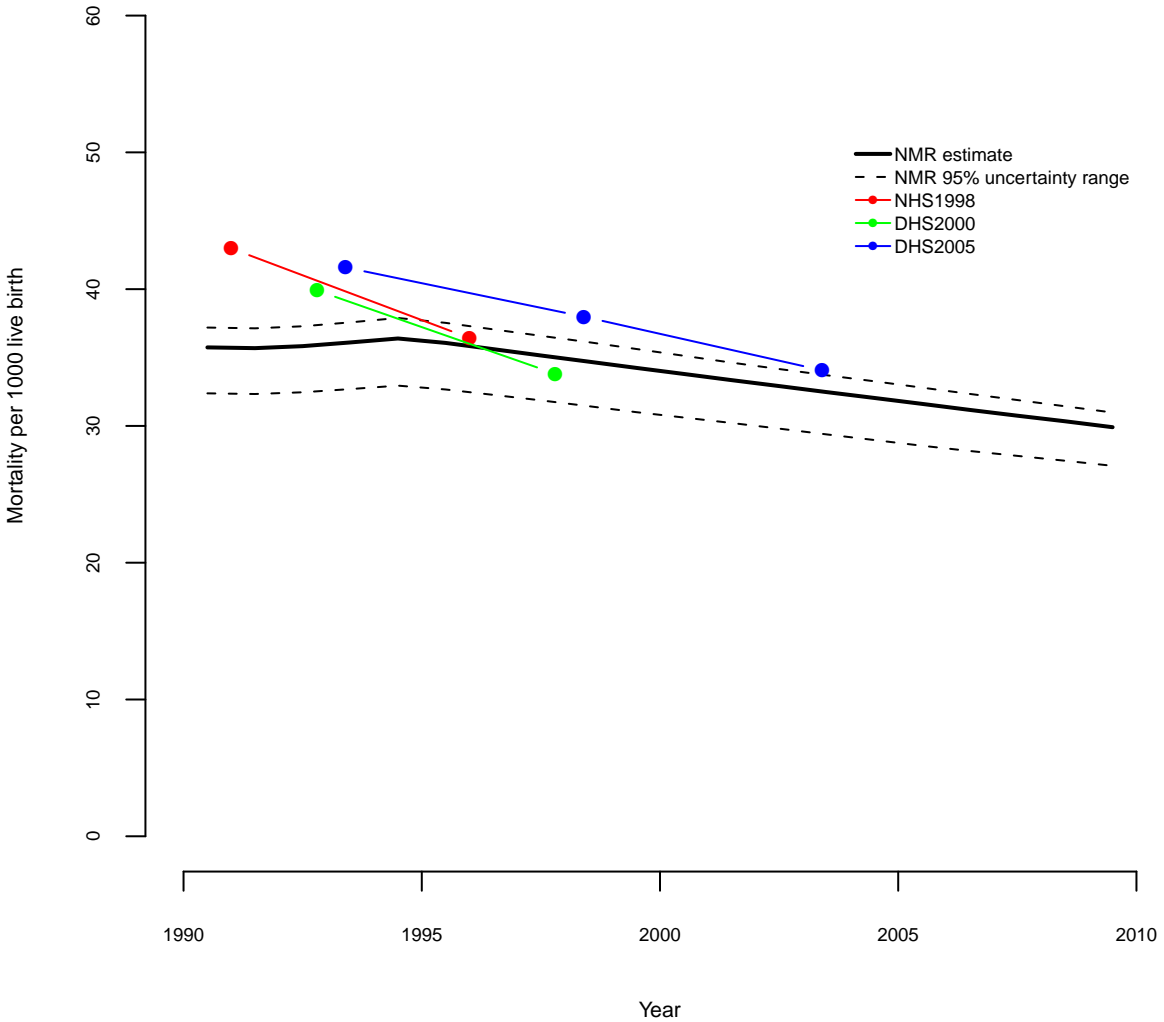

### Cambodia NMR and U5MR

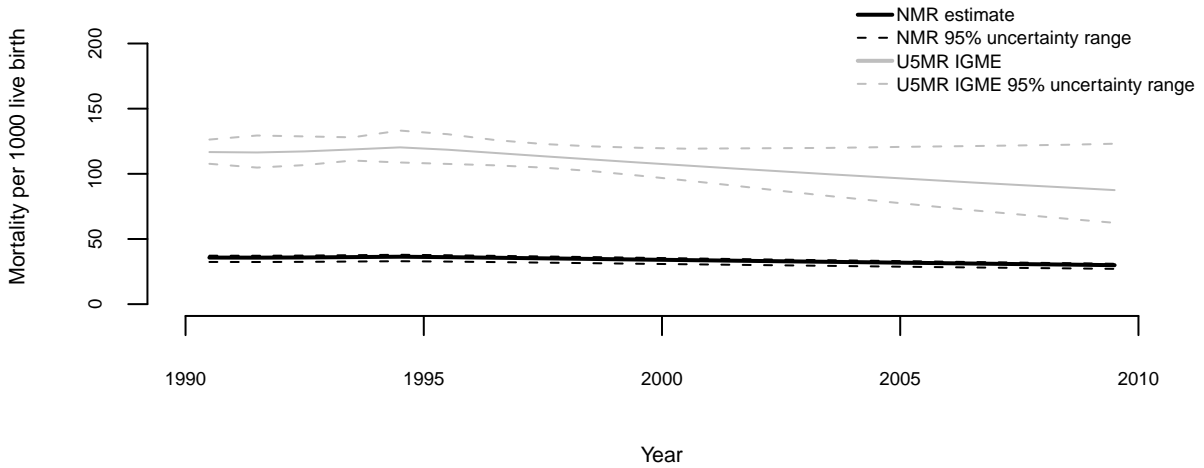

### Cambodia NMR as percentage of U5MR

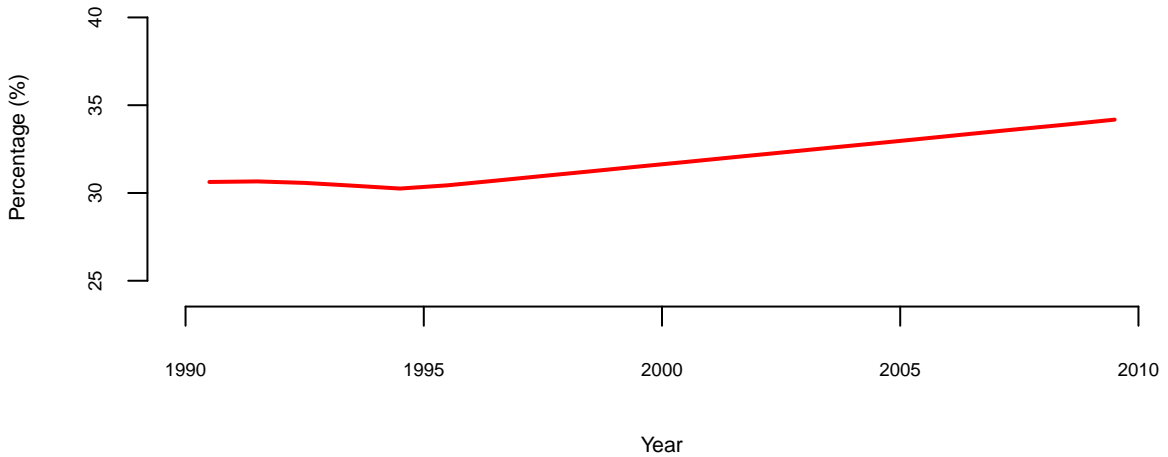

### Cameroon Data, and estimated NMR

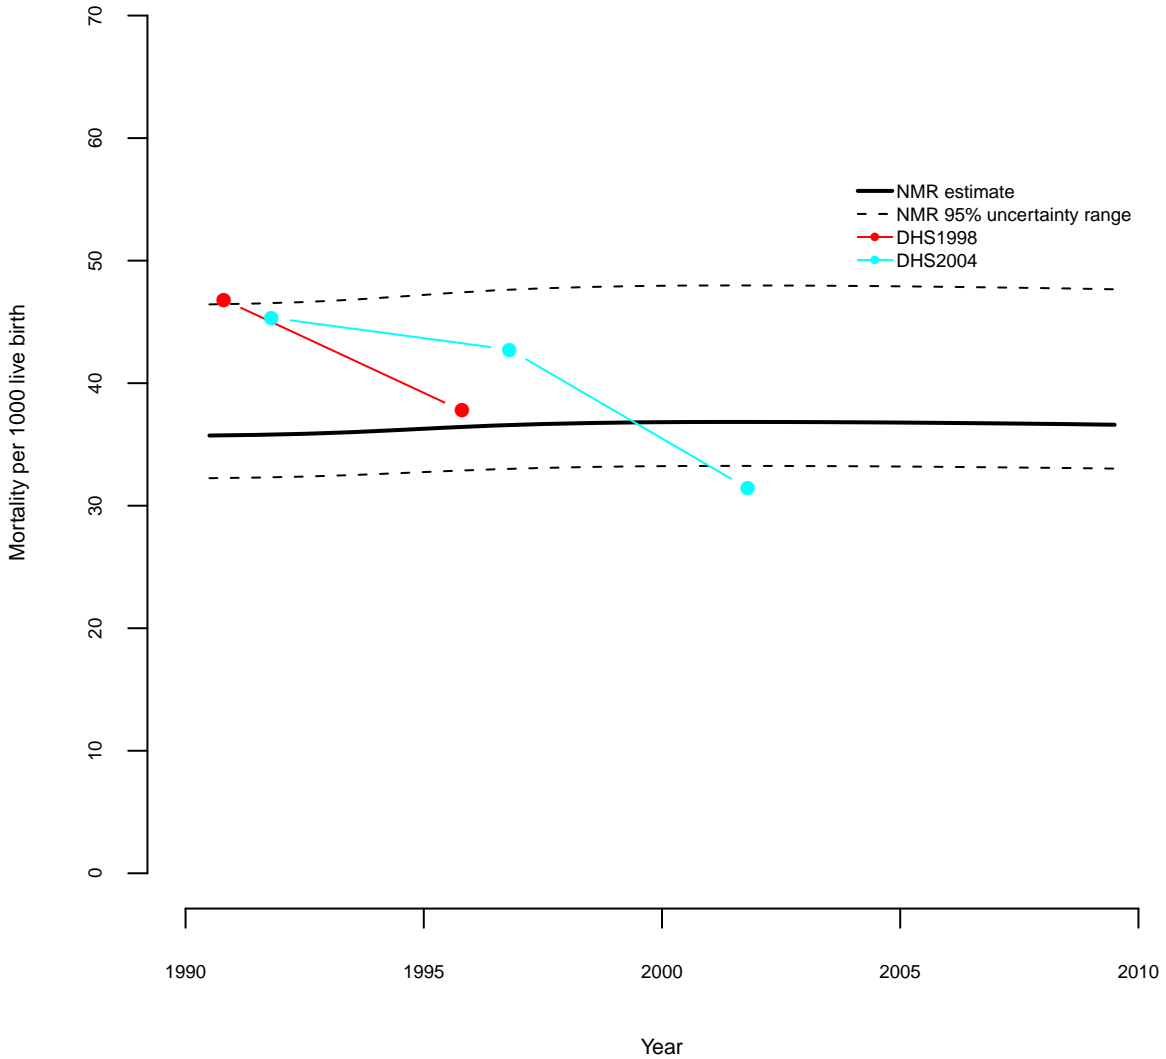

### Cameroon NMR and U5MR

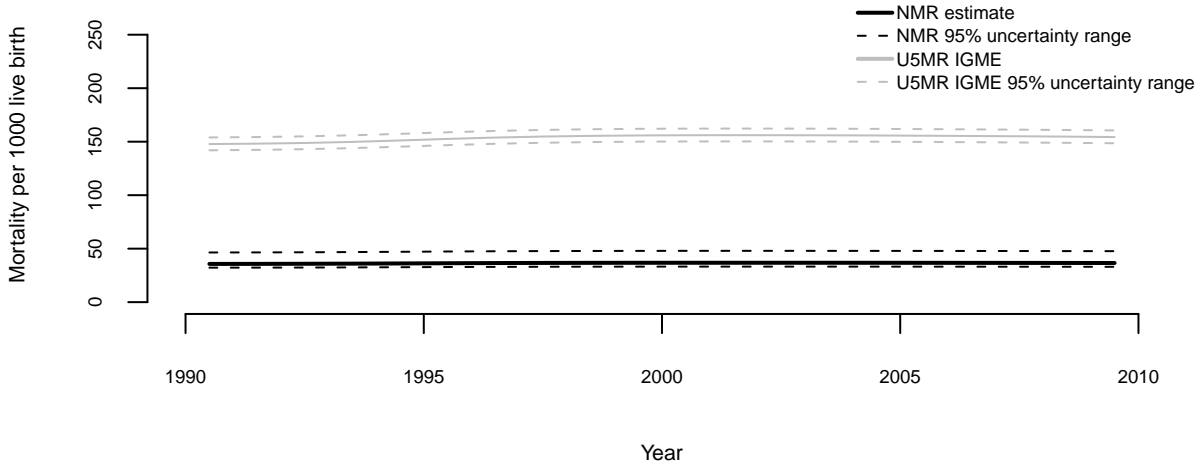

### Cameroon NMR as percentage of U5MR

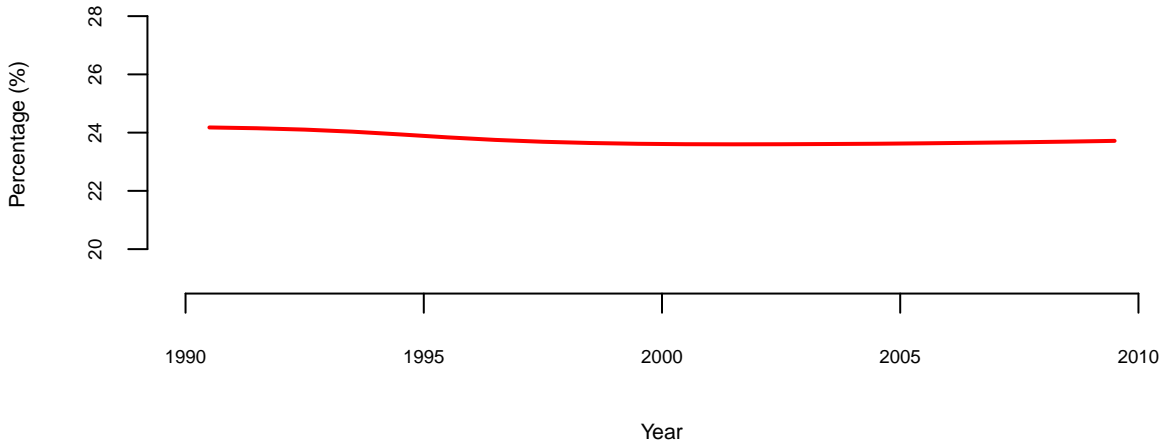

Canada  
Data, and estimated NMR

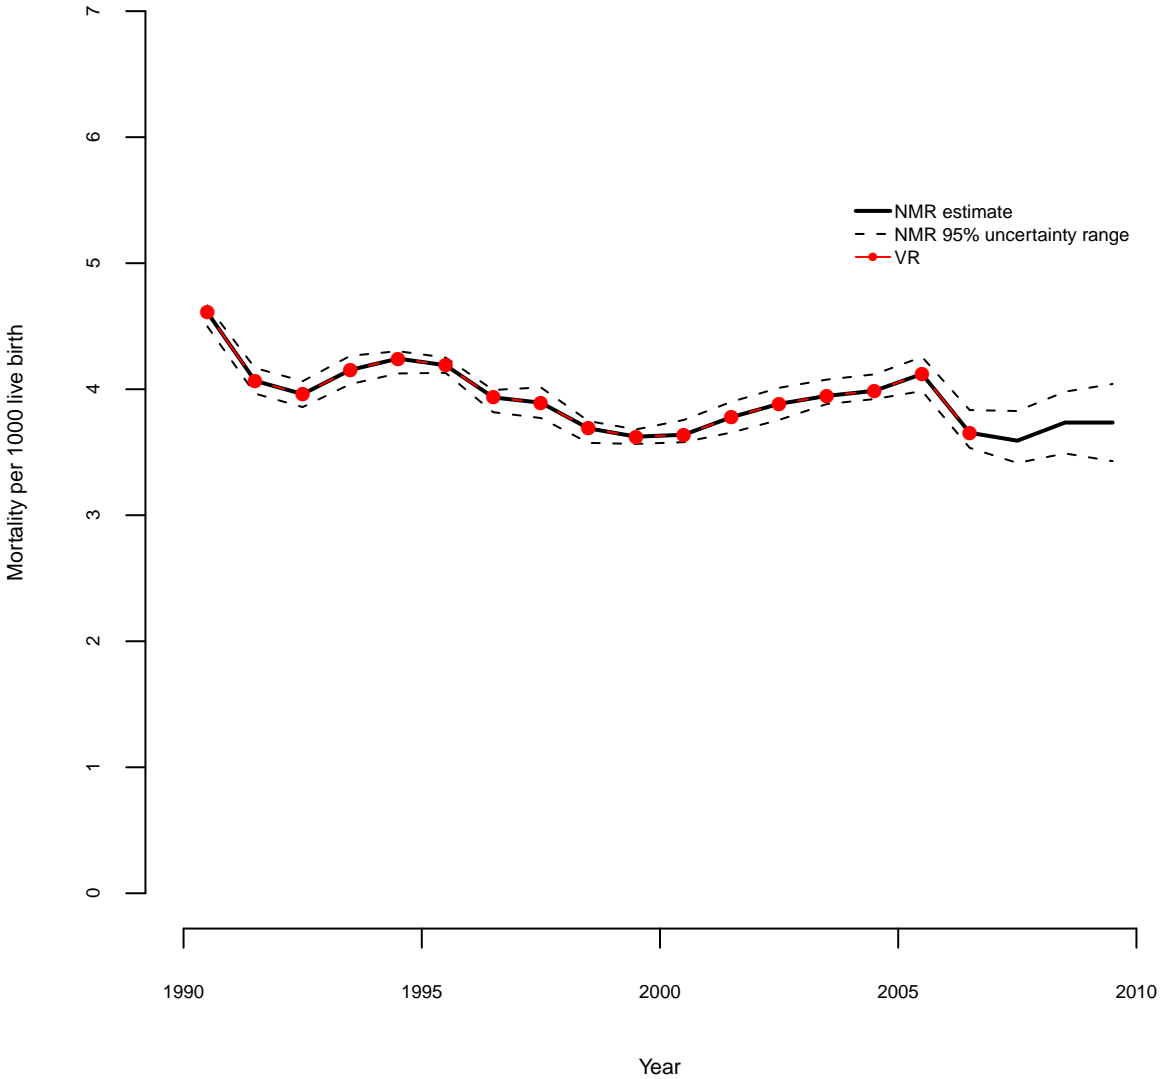

### Canada NMR and U5MR

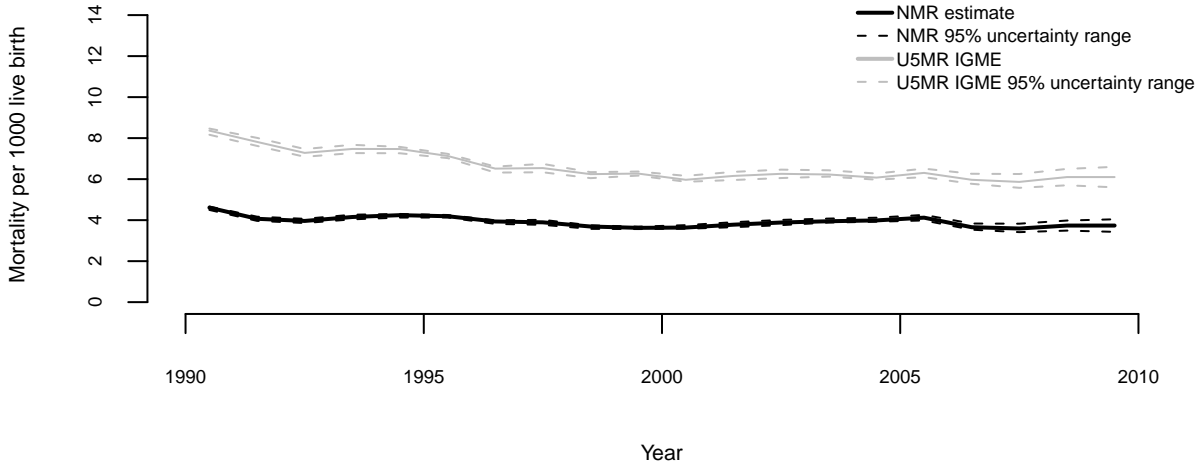

### Canada NMR as percentage of U5MR

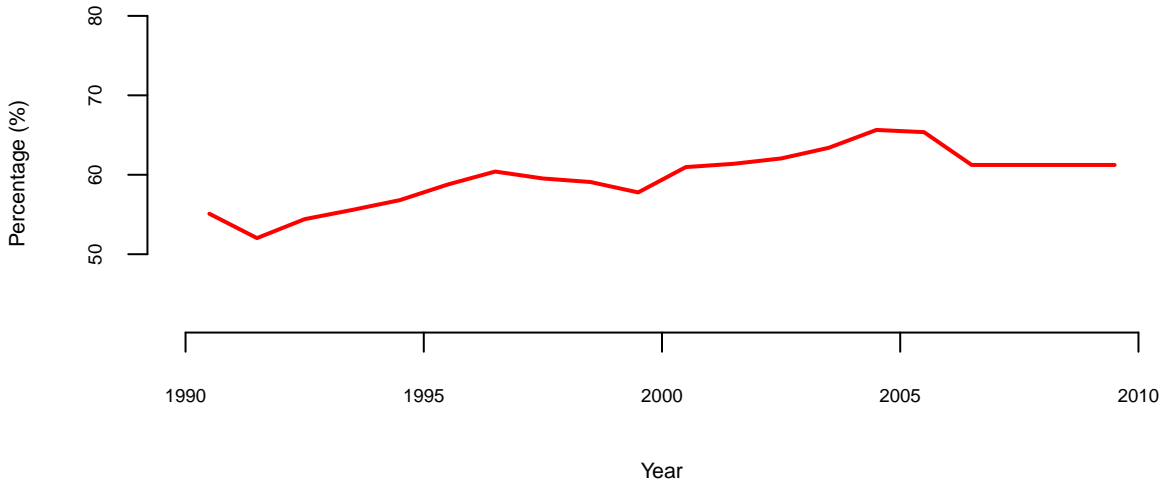

**Cape Verde**  
**Data, and estimated NMR**

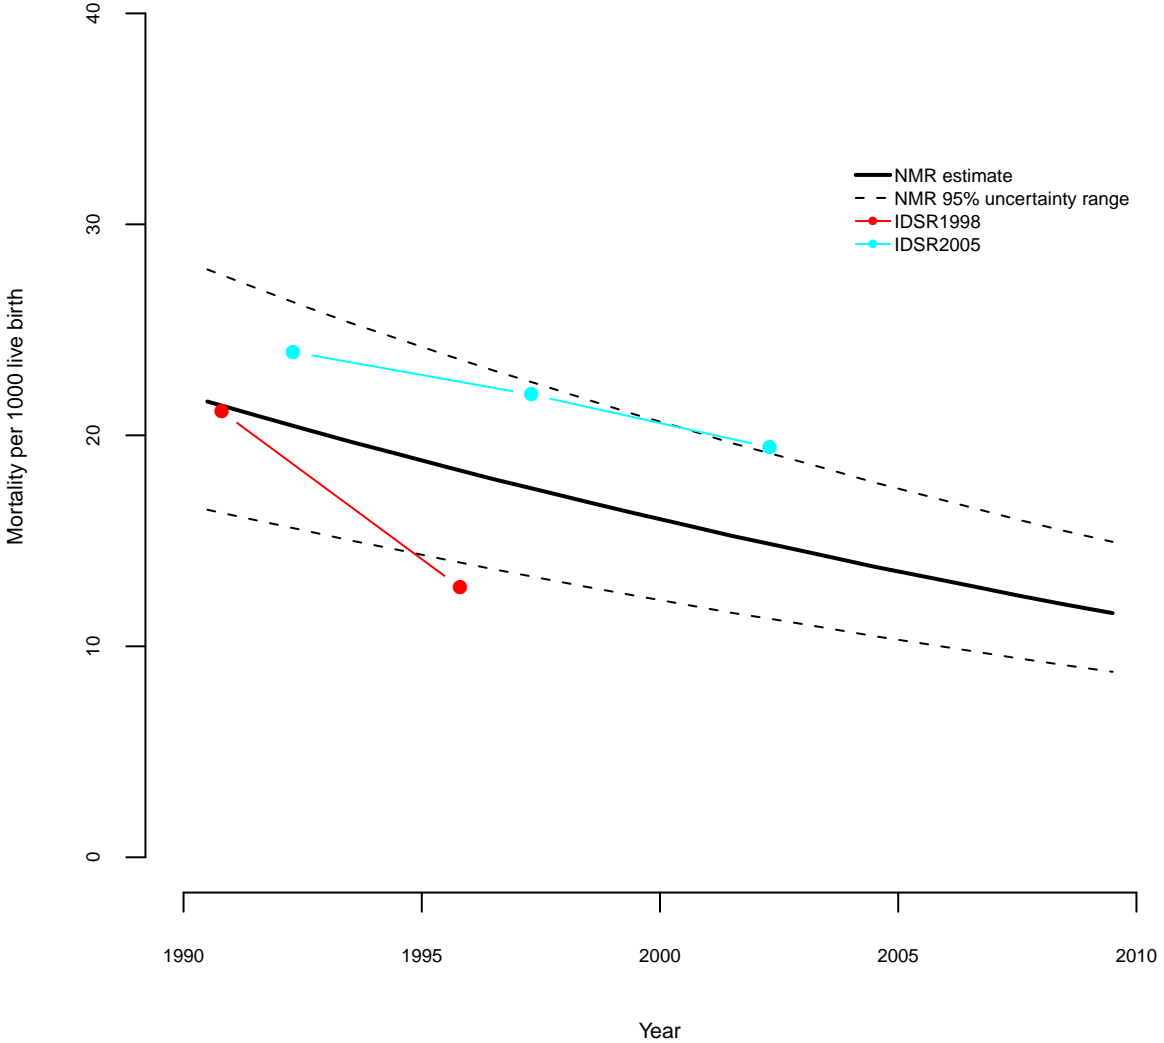

### Cape Verde NMR and U5MR

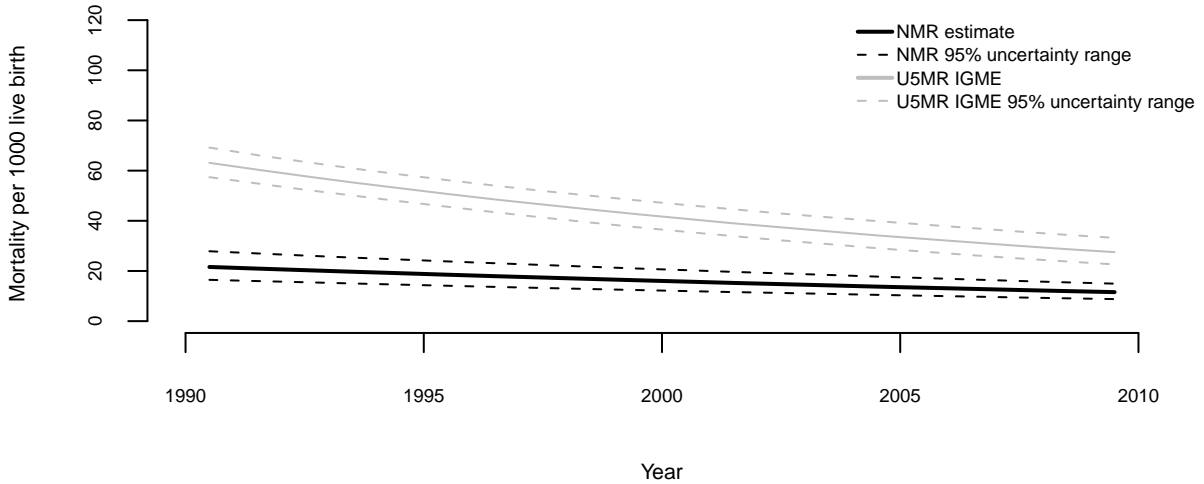

### Cape Verde NMR as percentage of U5MR

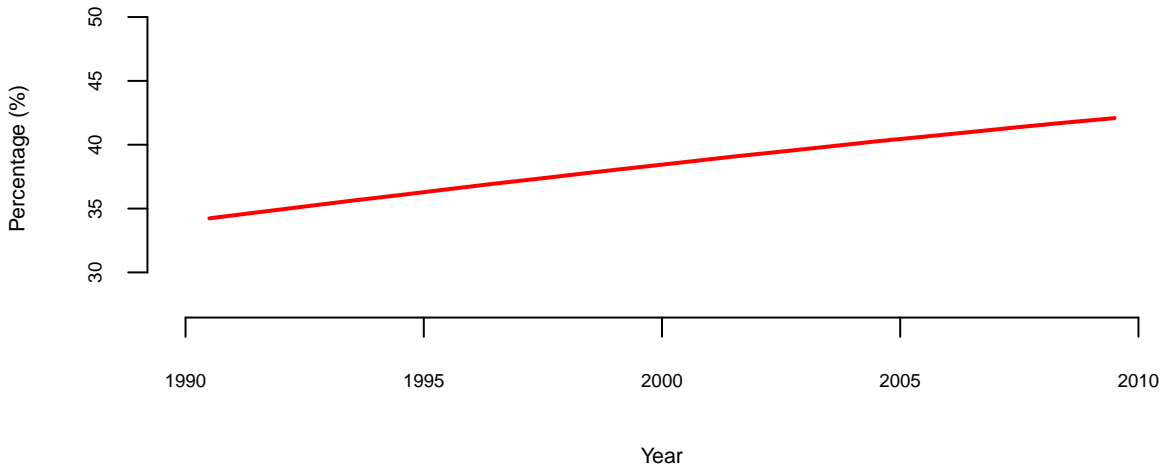



### Central African Republic Data, and estimated NMR

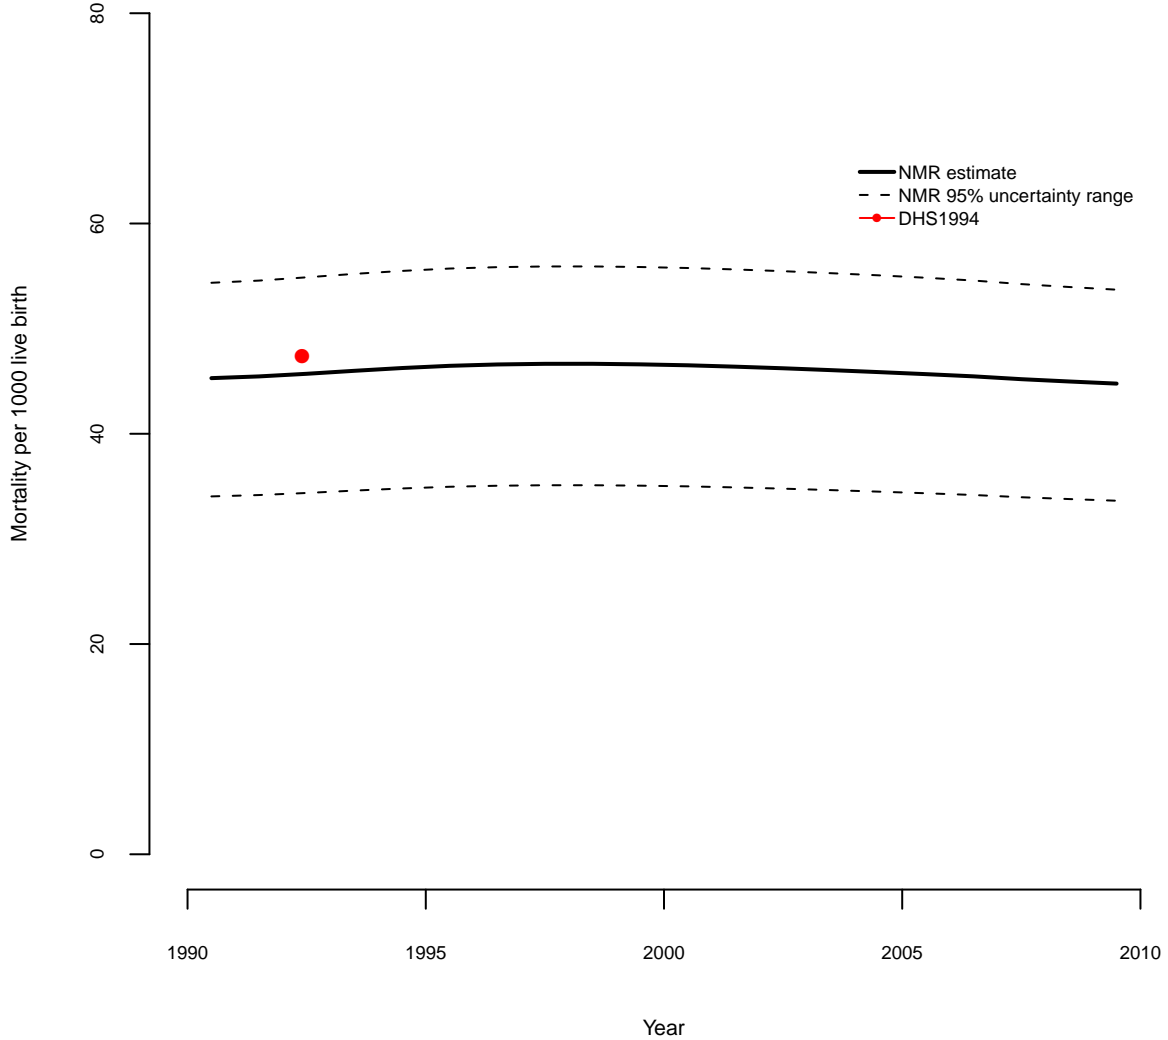

### Central African Republic NMR and U5MR

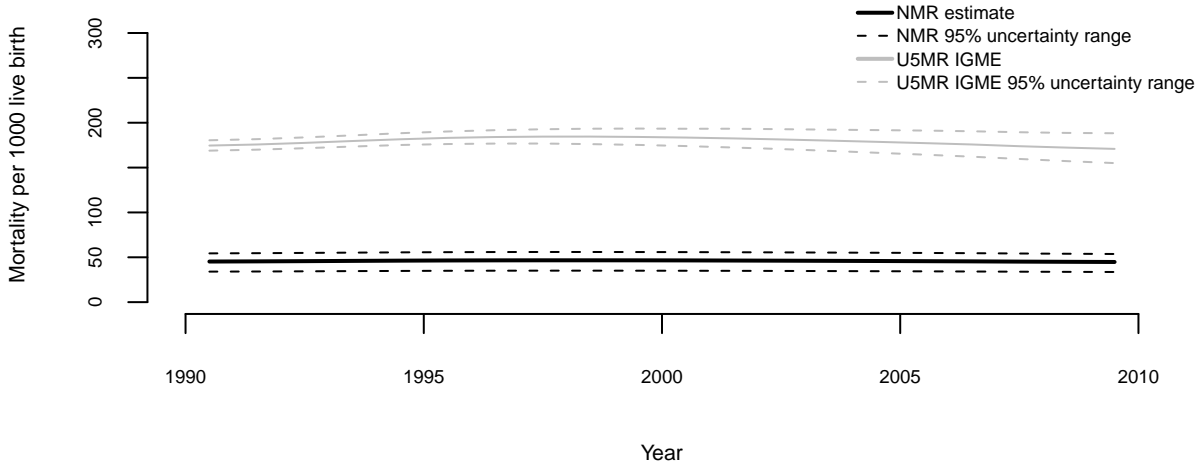

### Central African Republic NMR as percentage of U5MR

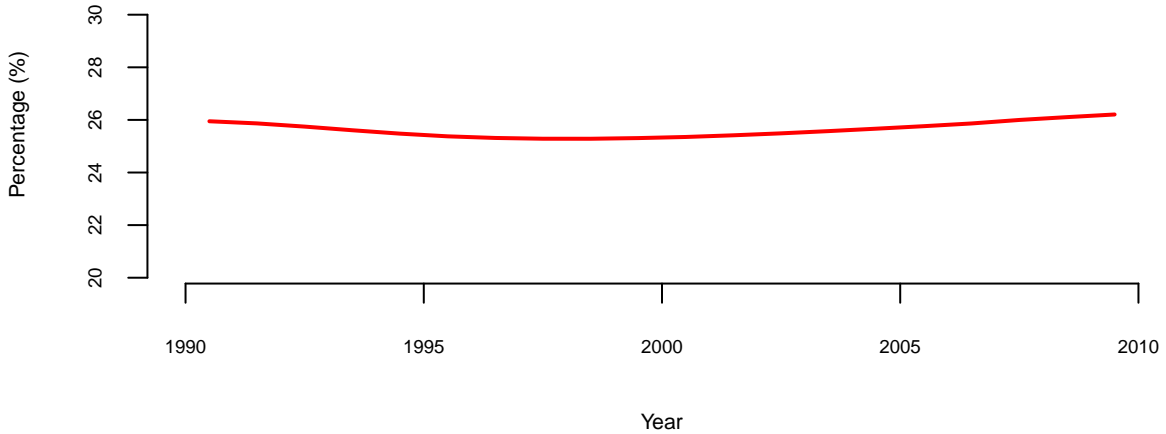

Chad  
Data, and estimated NMR

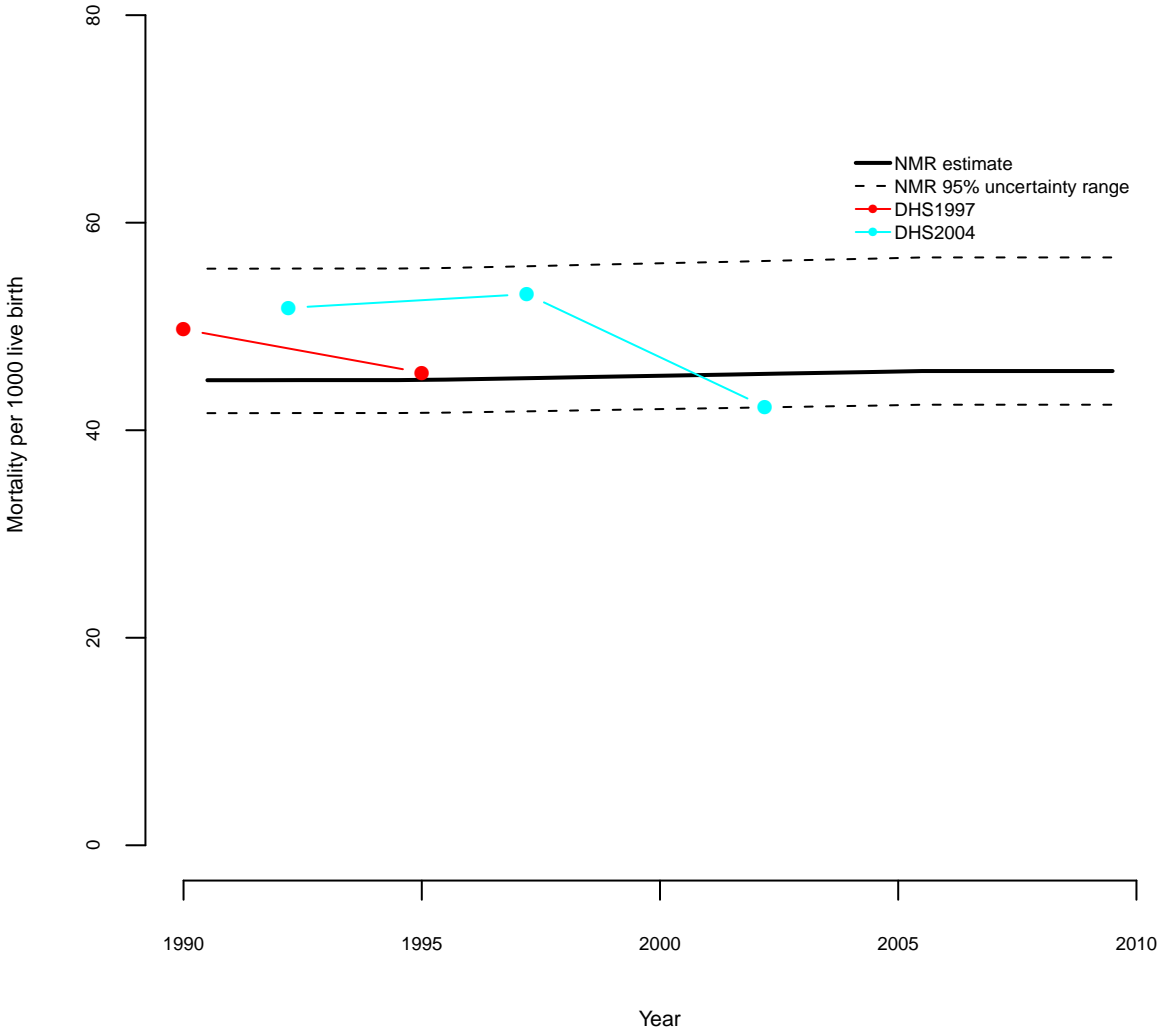

### Chad NMR and U5MR

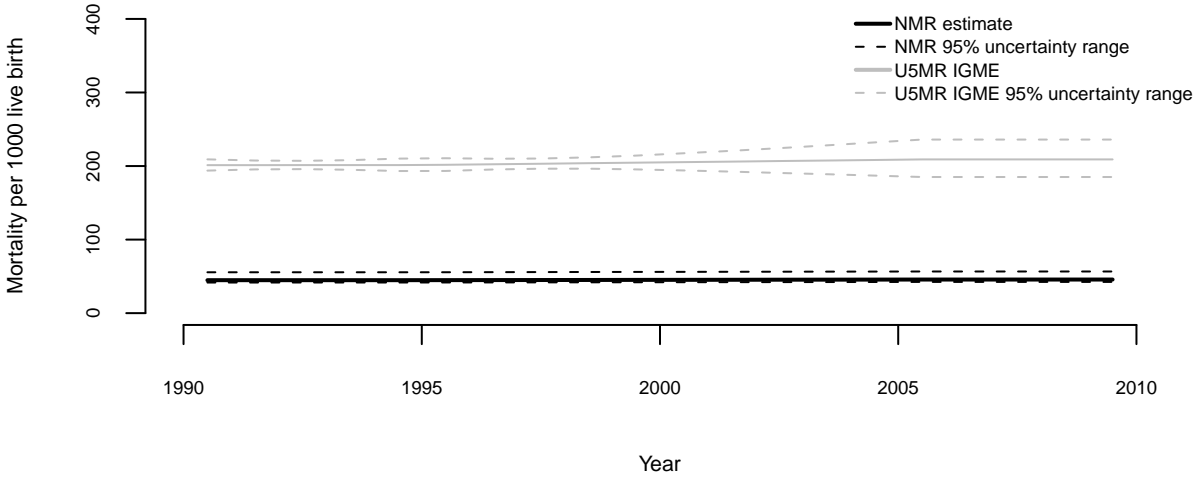

### Chad NMR as percentage of U5MR

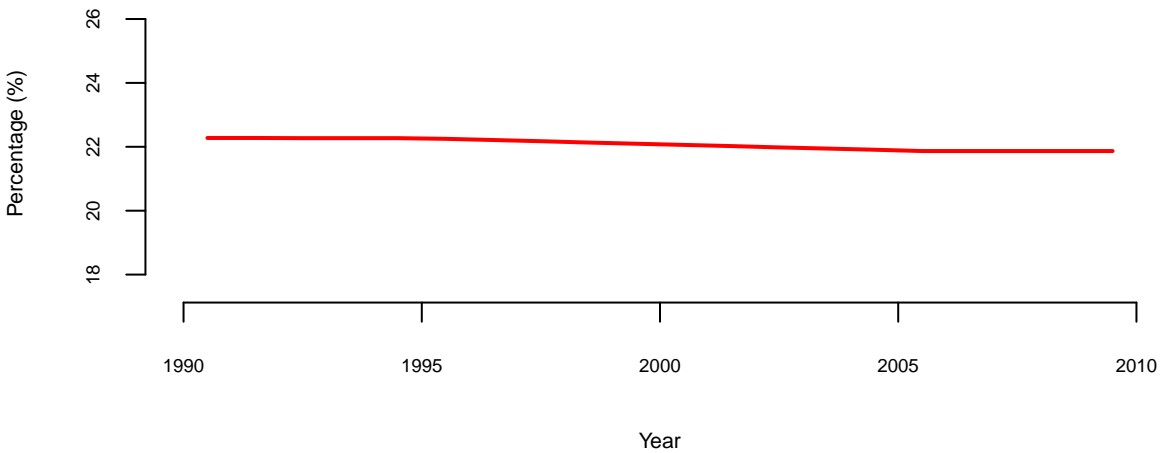

# Chile

## Data, and estimated NMR

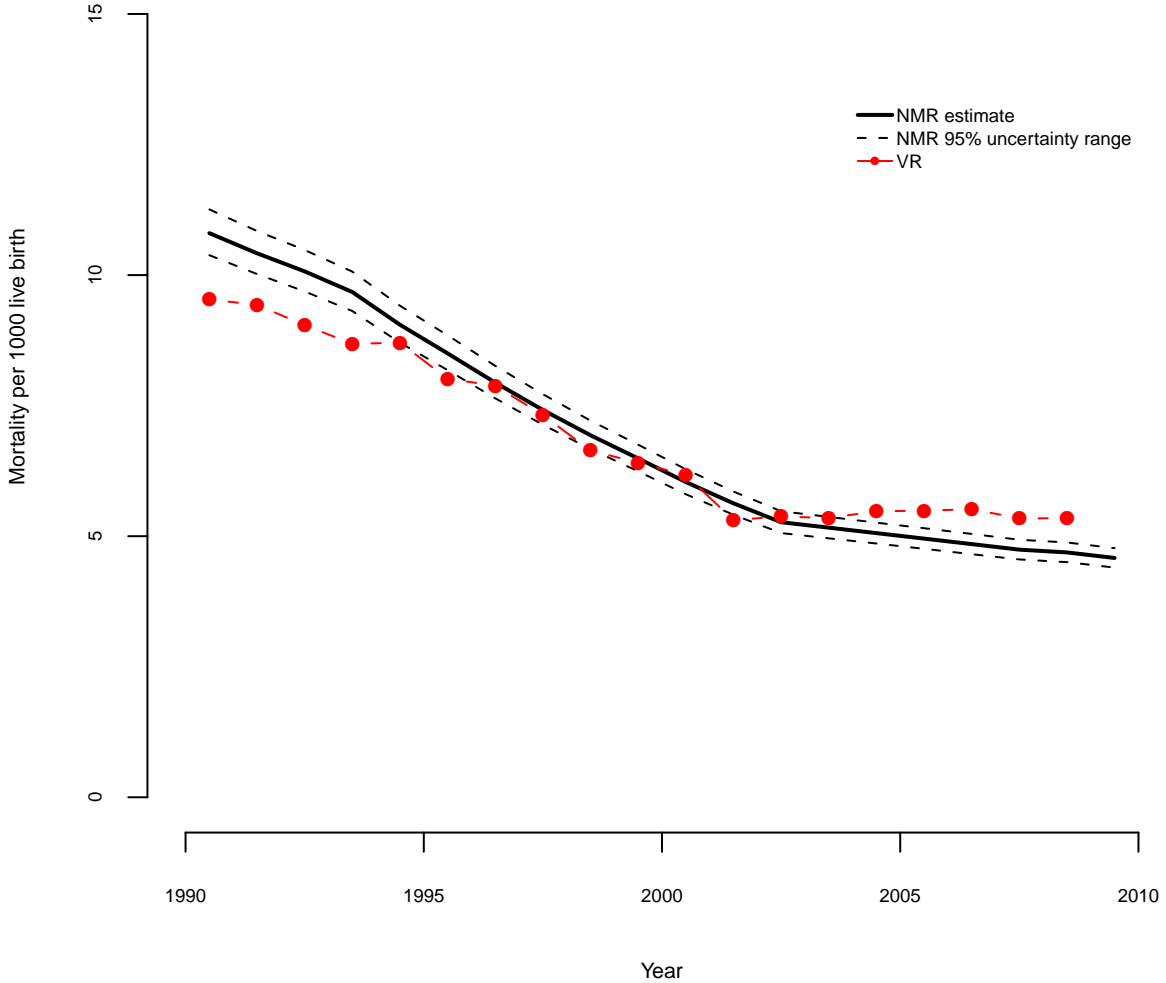

### Chile NMR and U5MR

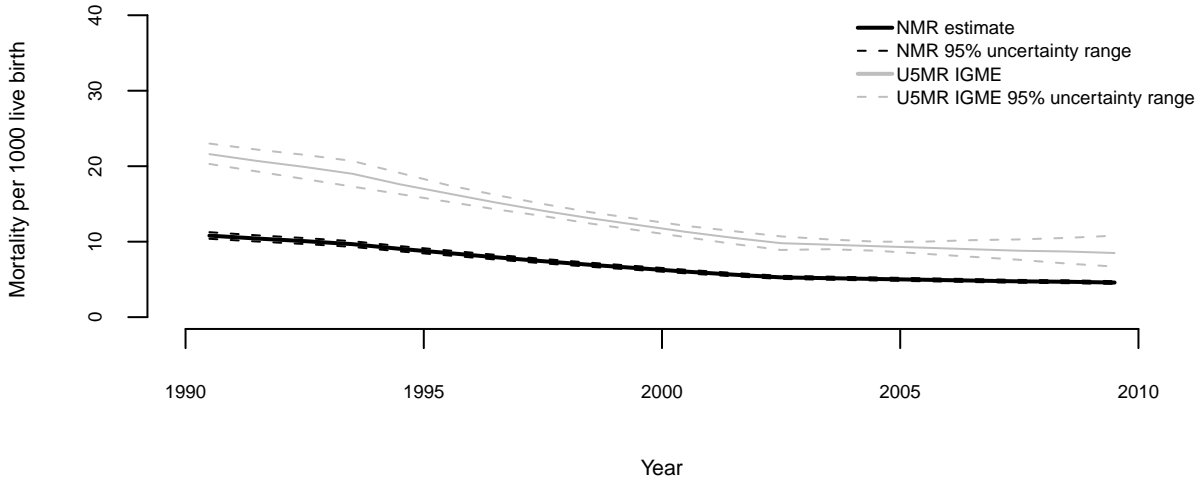

### Chile NMR as percentage of U5MR

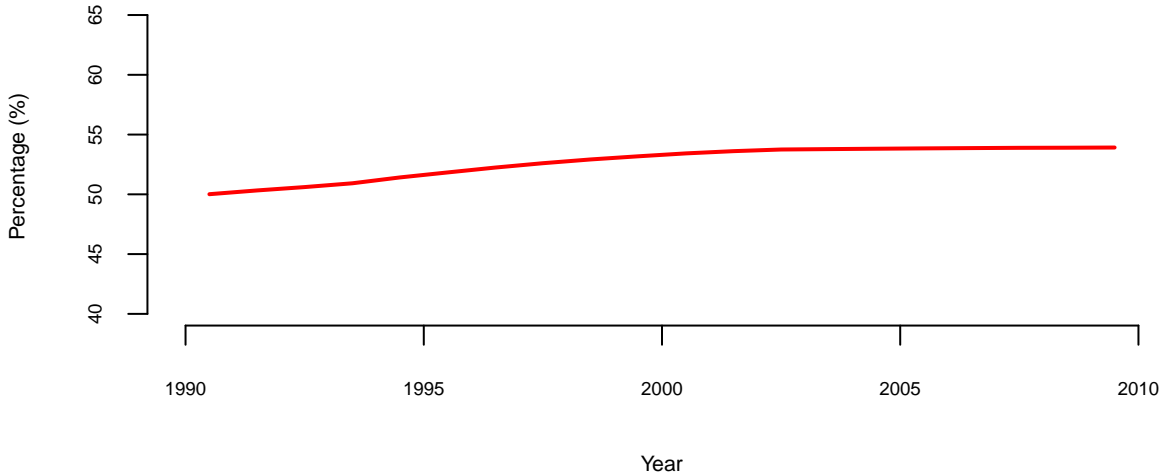

China  
Data, and estimated NMR

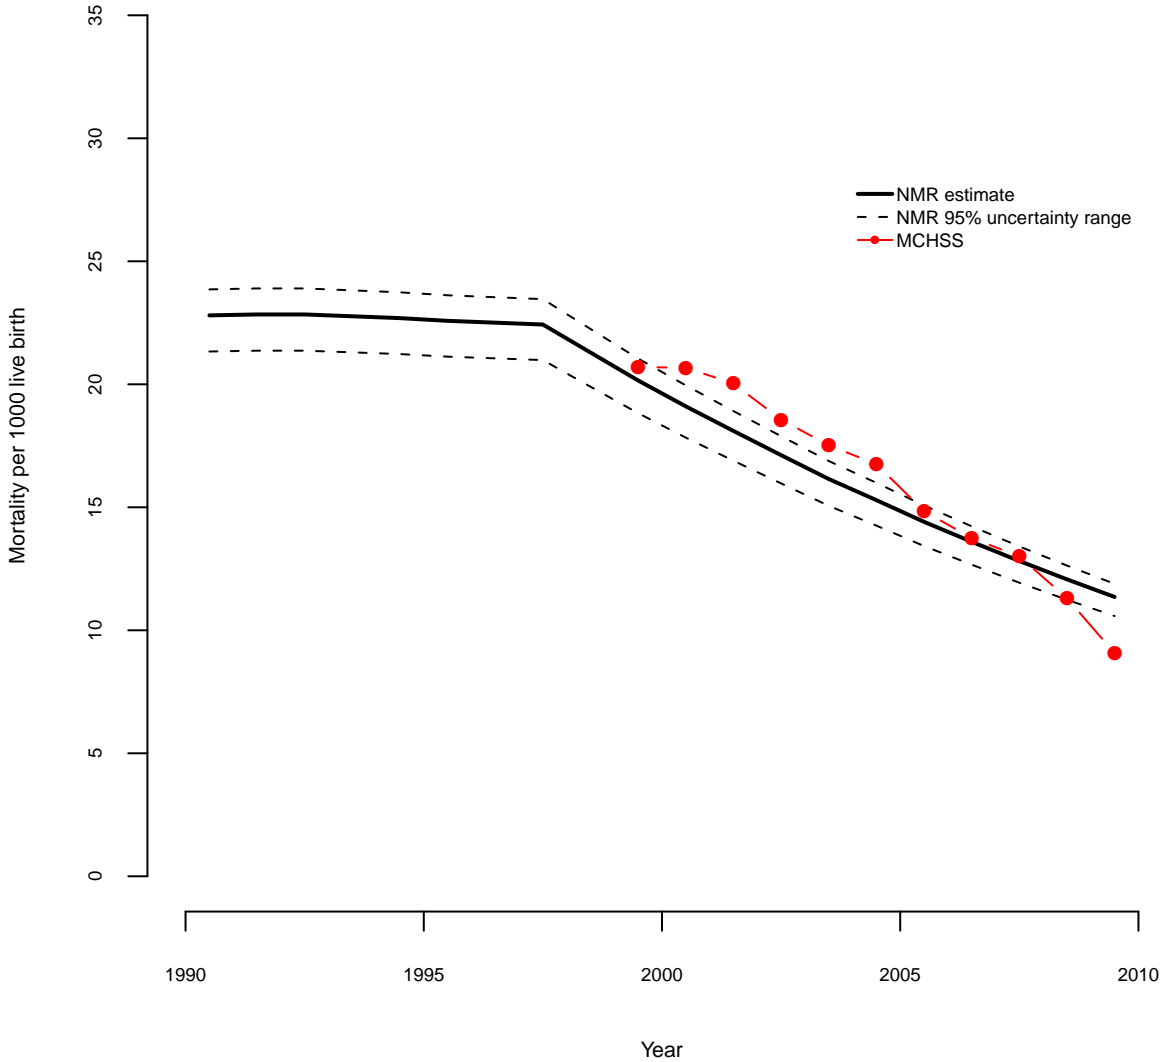

### China NMR and U5MR

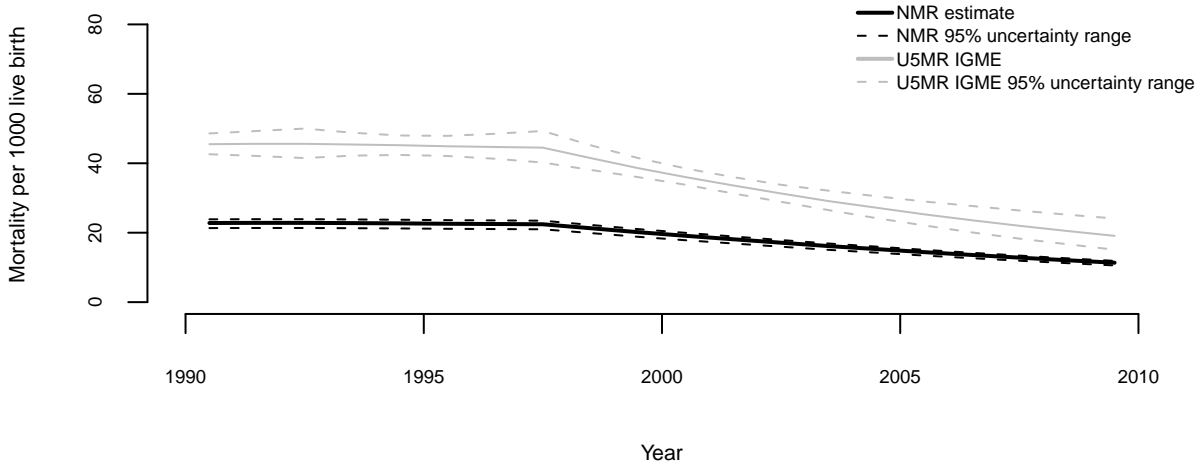

### China NMR as percentage of U5MR

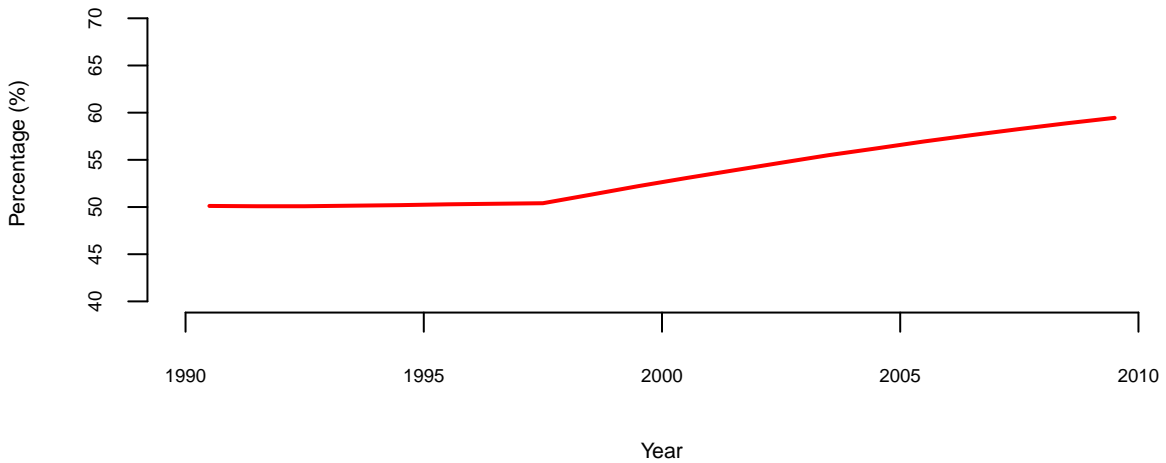



Colombia  
Data, and estimated NMR

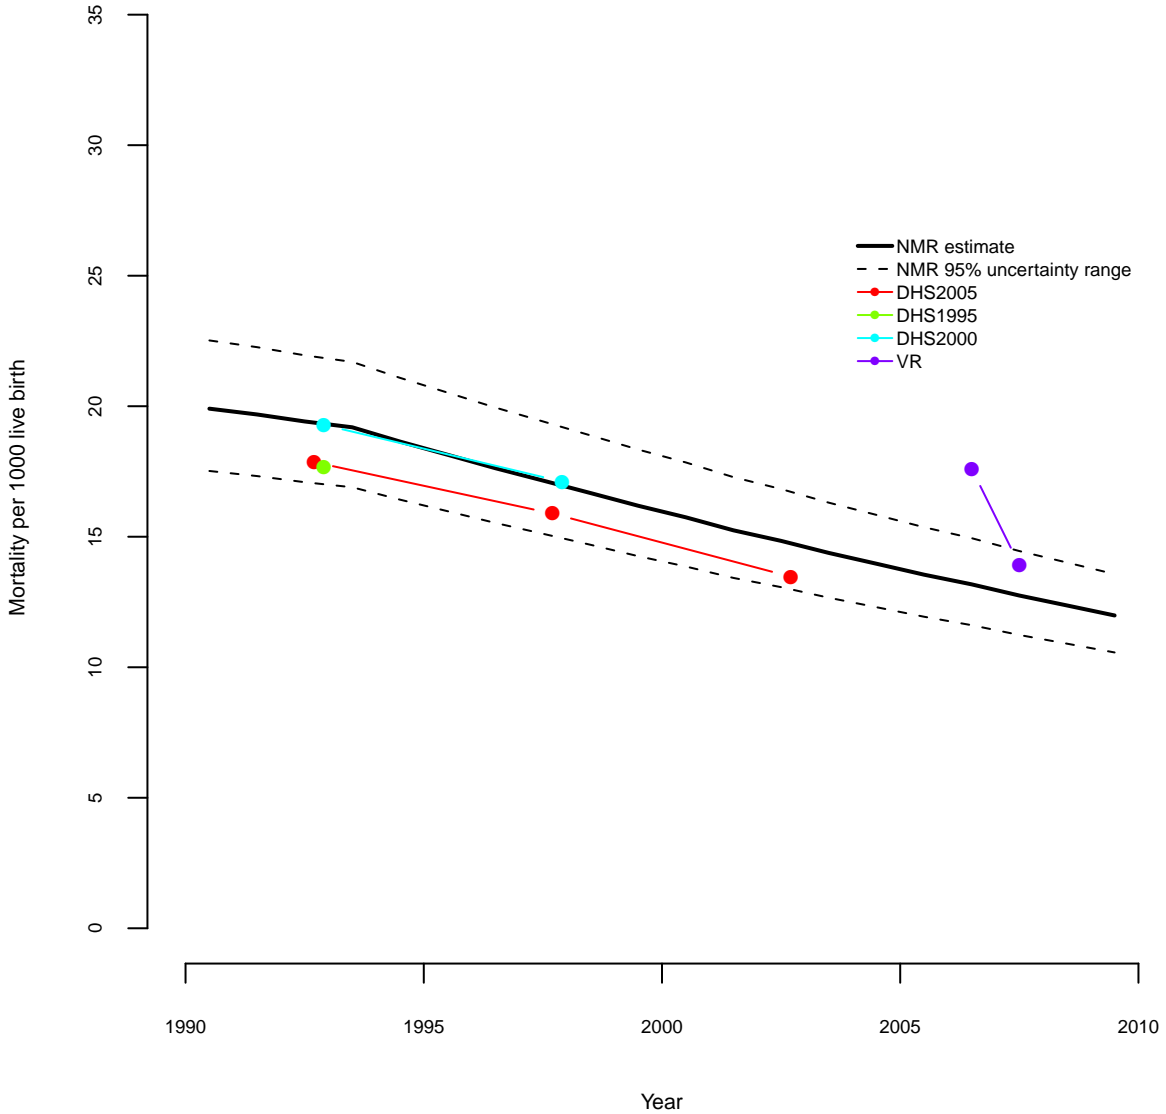

### Colombia NMR and U5MR

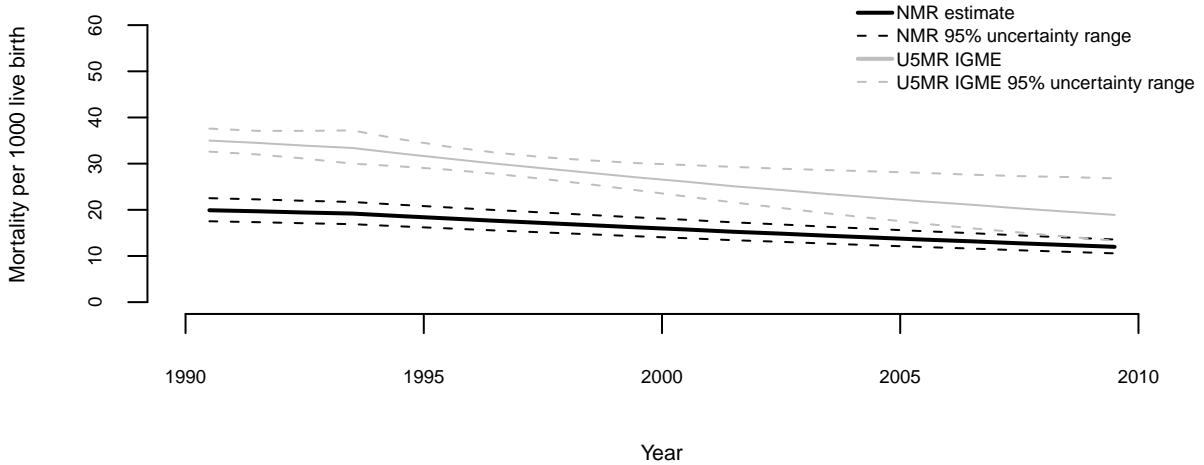

### Colombia NMR as percentage of U5MR

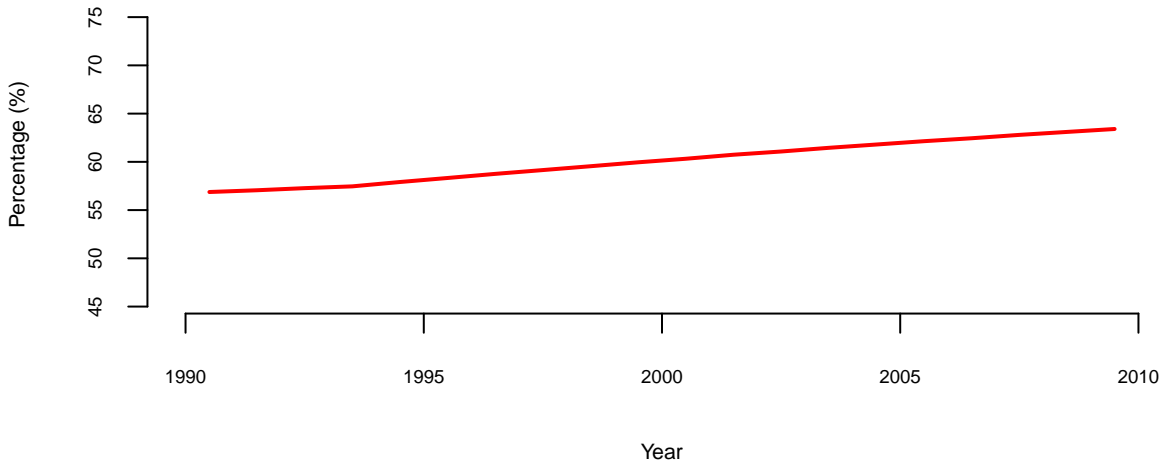

**Comoros**  
**Data, and estimated NMR**

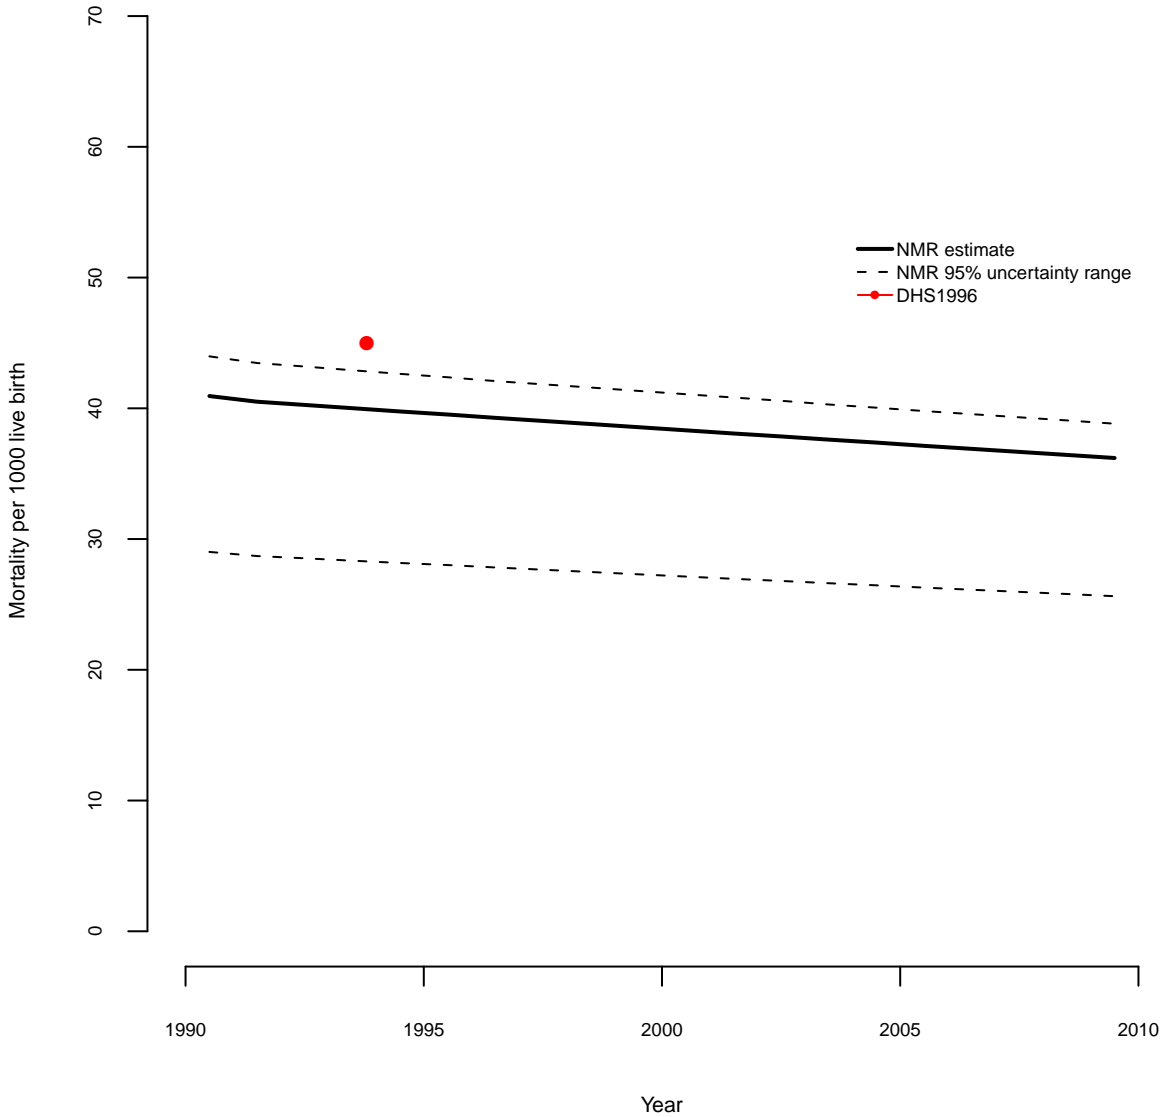

### Comoros NMR and U5MR

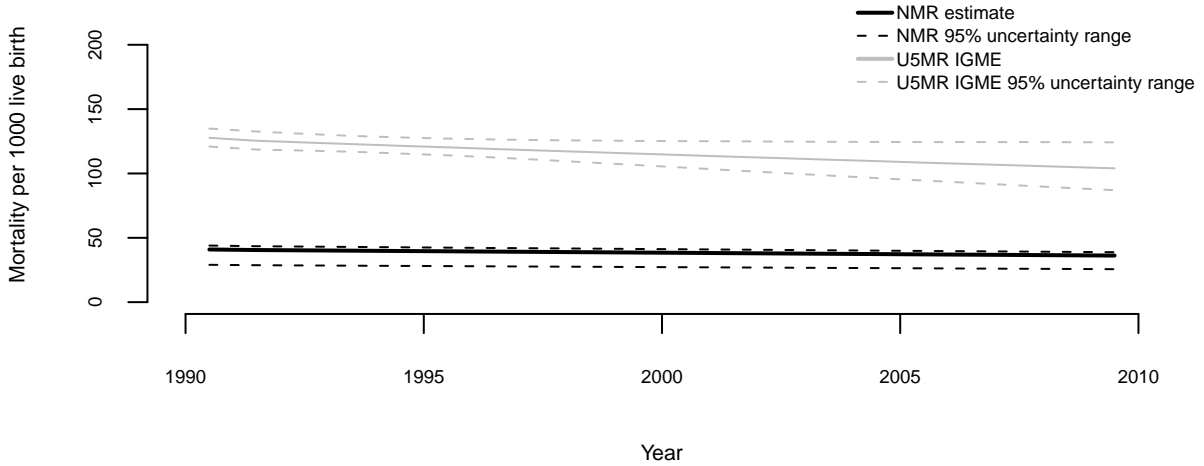

### Comoros NMR as percentage of U5MR

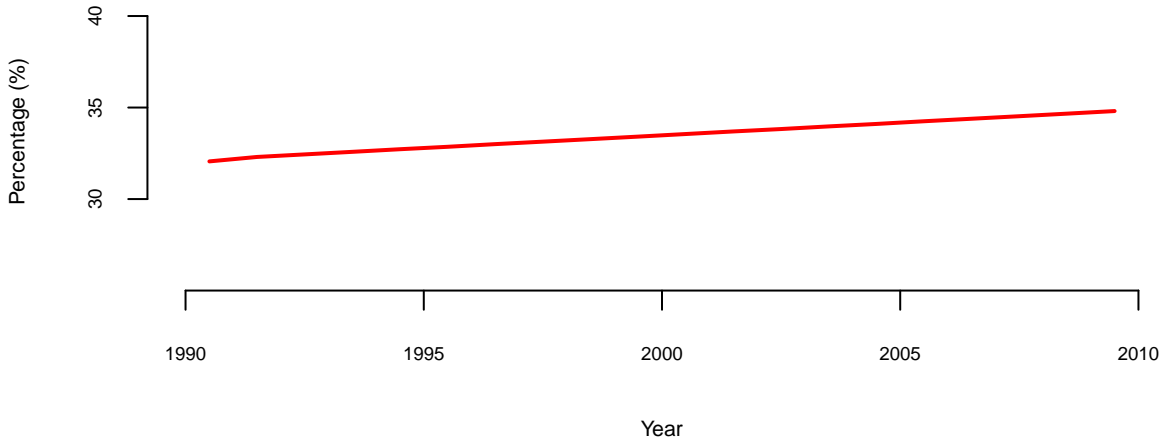

### Congo Data, and estimated NMR

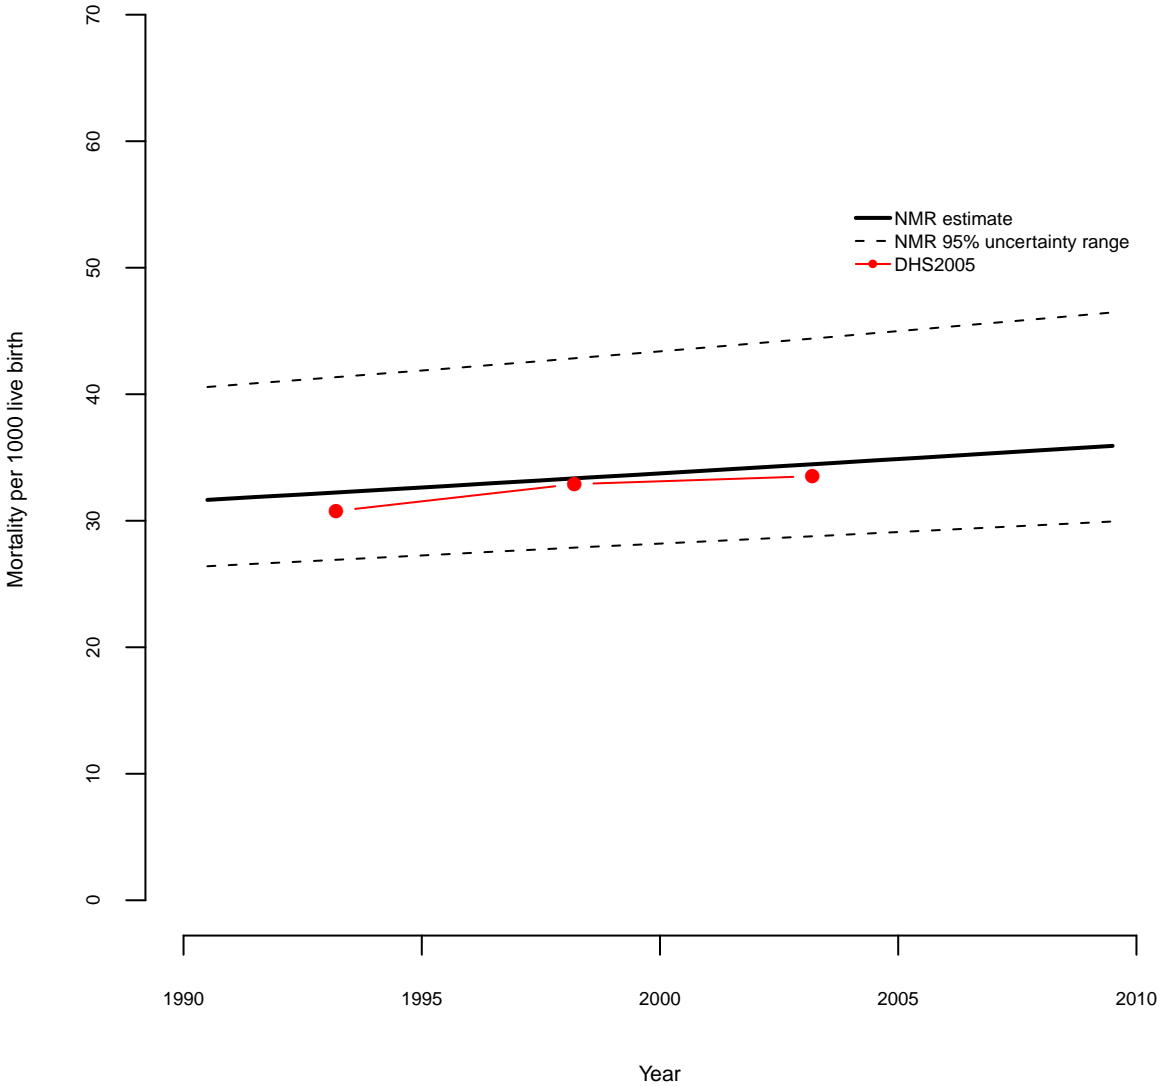

### Congo NMR and U5MR

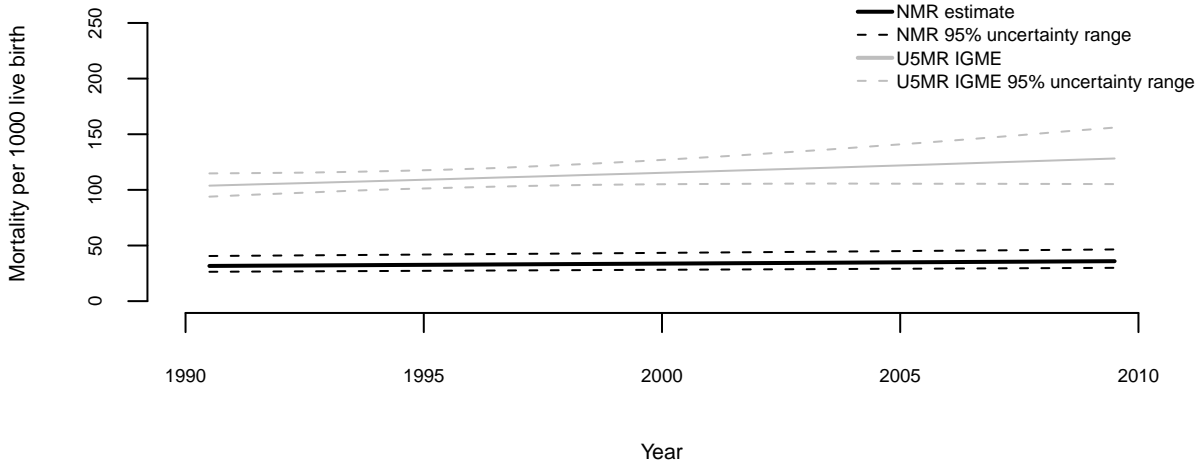

### Congo NMR as percentage of U5MR

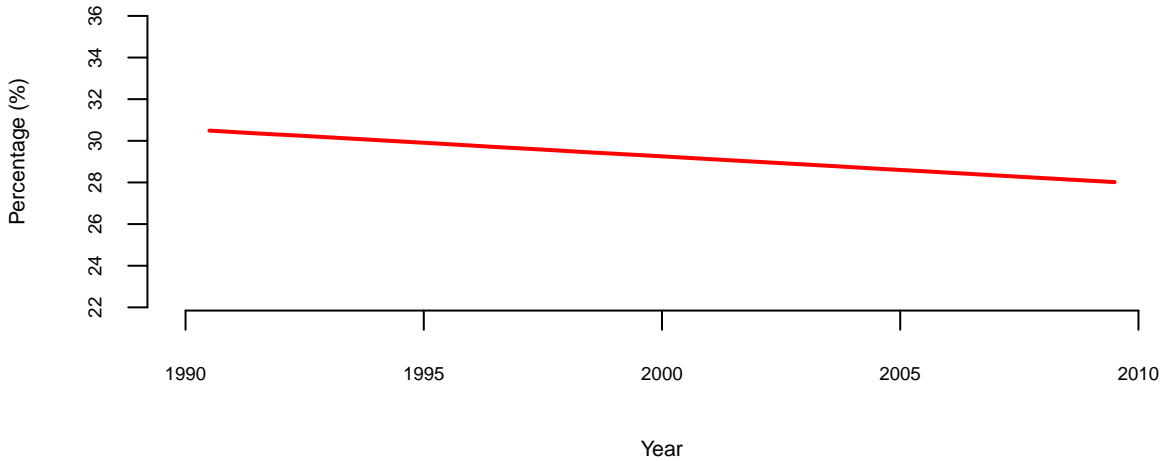

**Cook Islands**  
**Data, and estimated NMR**

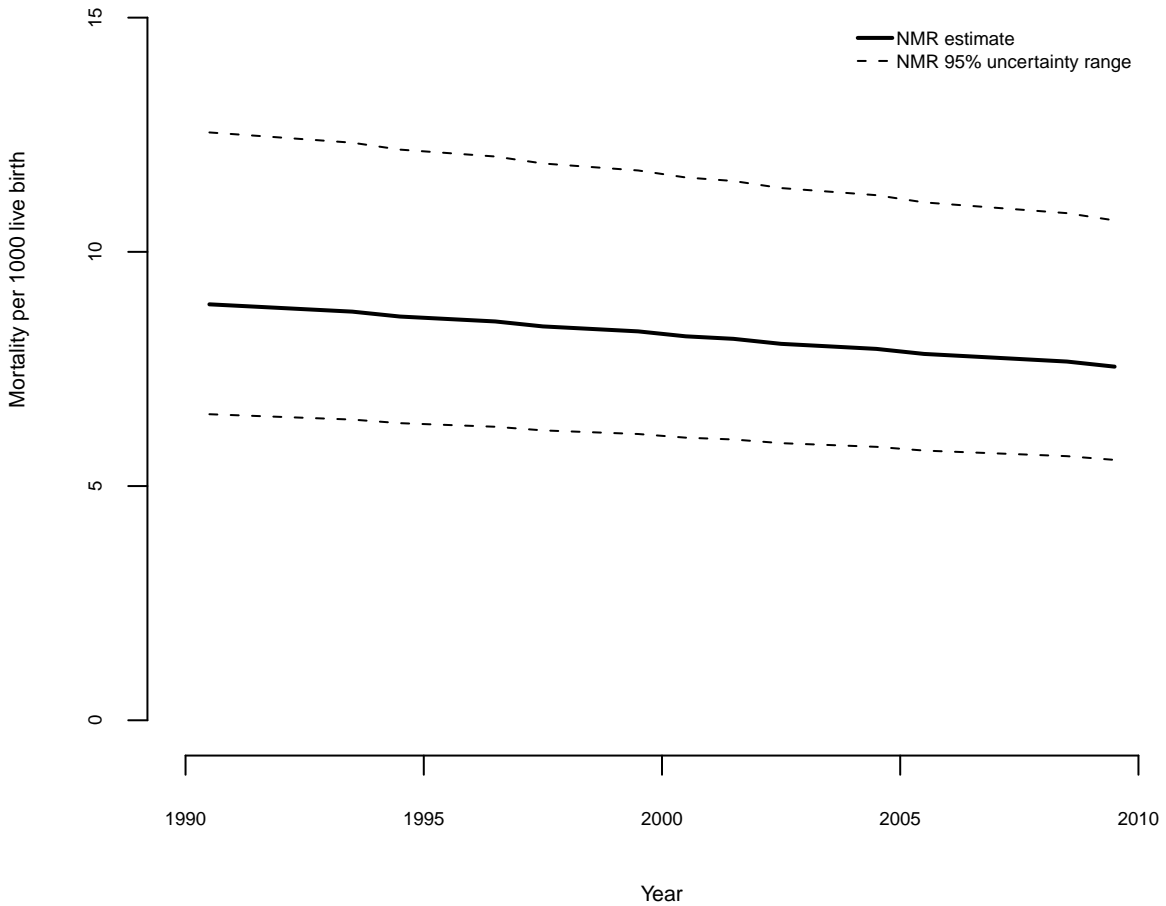

### Cook Islands NMR and U5MR

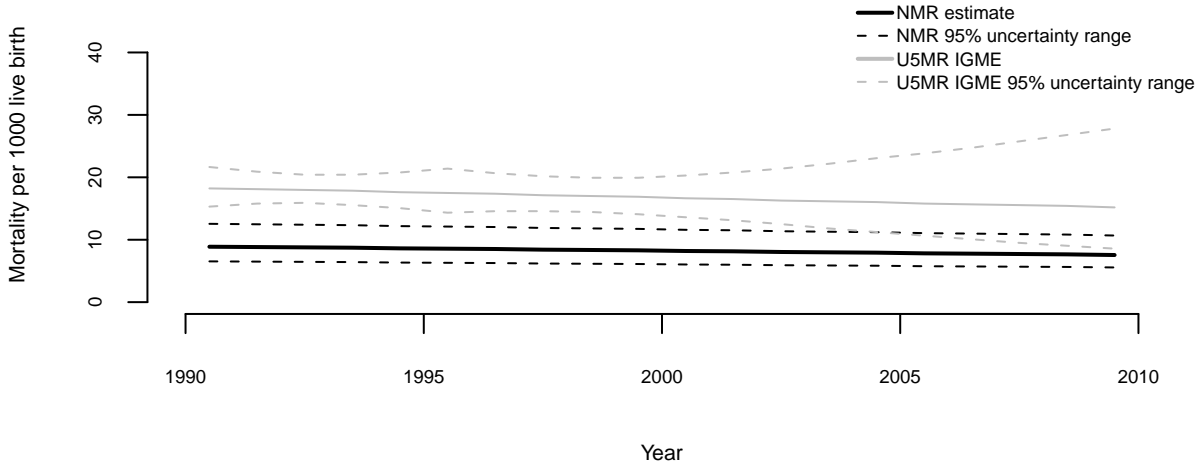

### Cook Islands NMR as percentage of U5MR

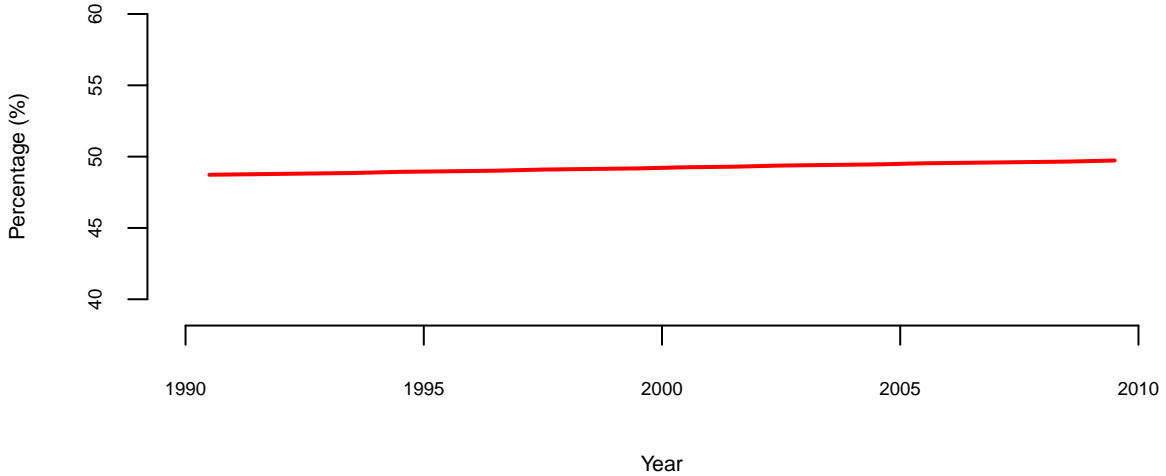



### Costa Rica Data, and estimated NMR

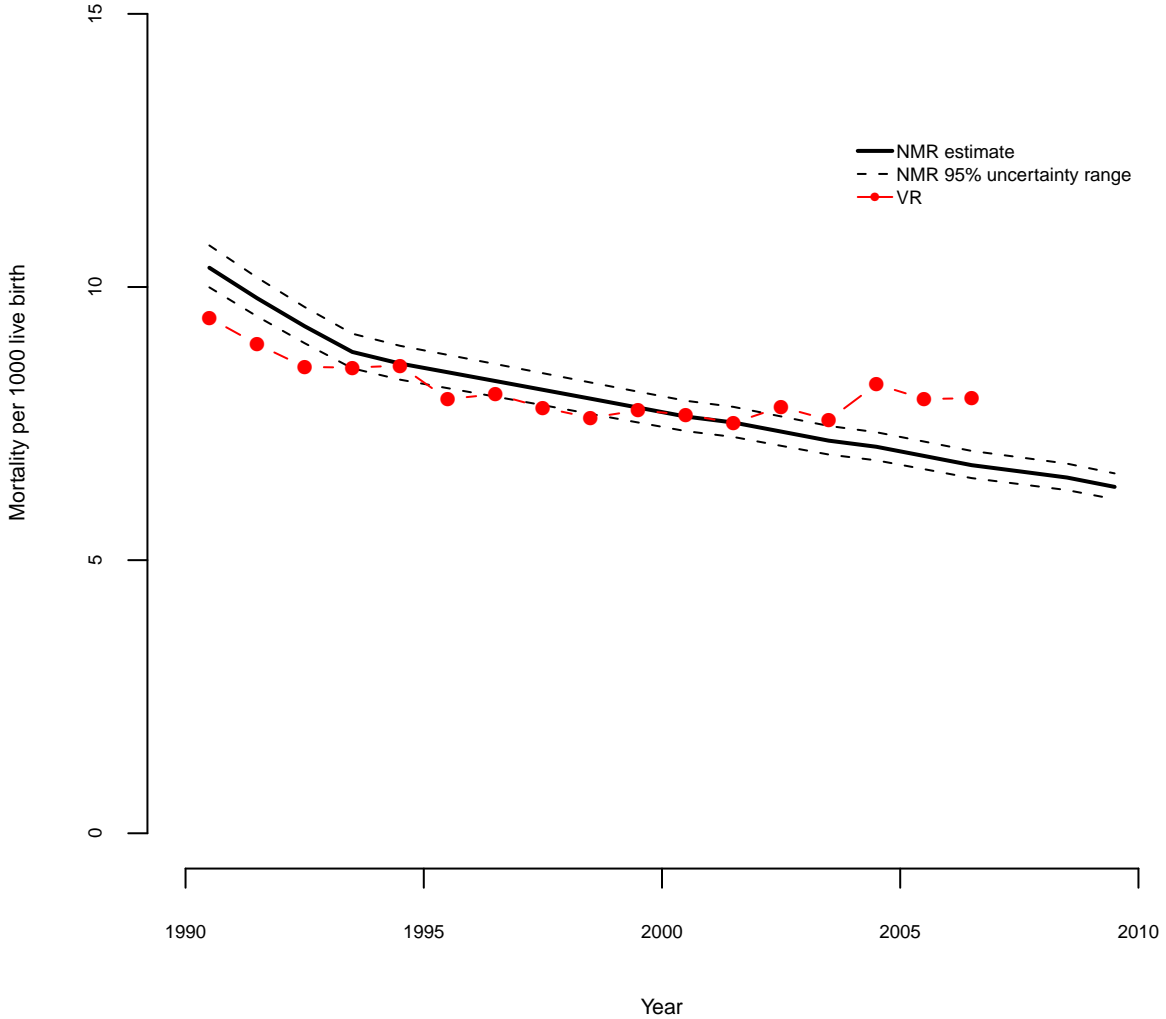

### Costa Rica NMR and U5MR

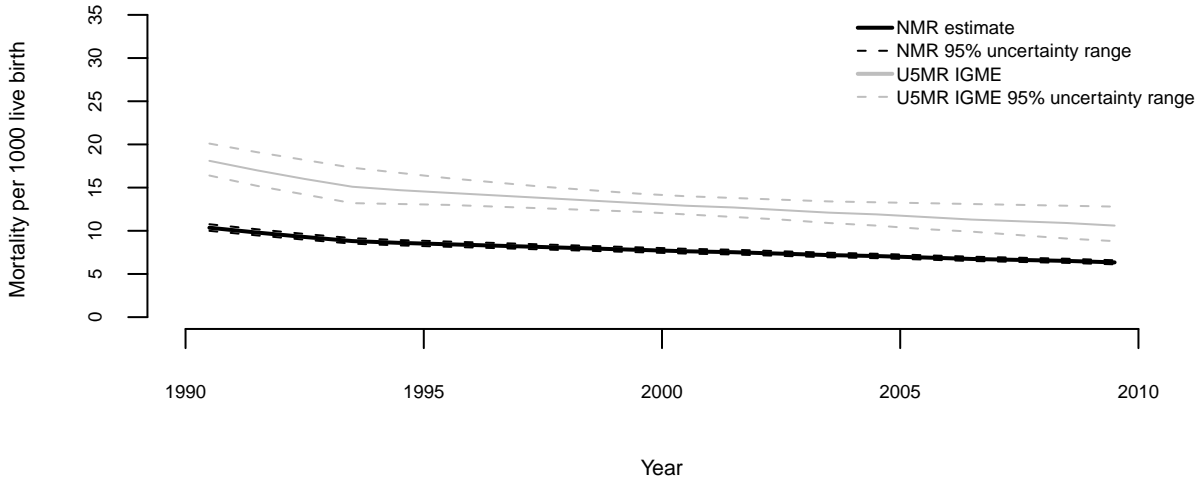

### Costa Rica NMR as percentage of U5MR

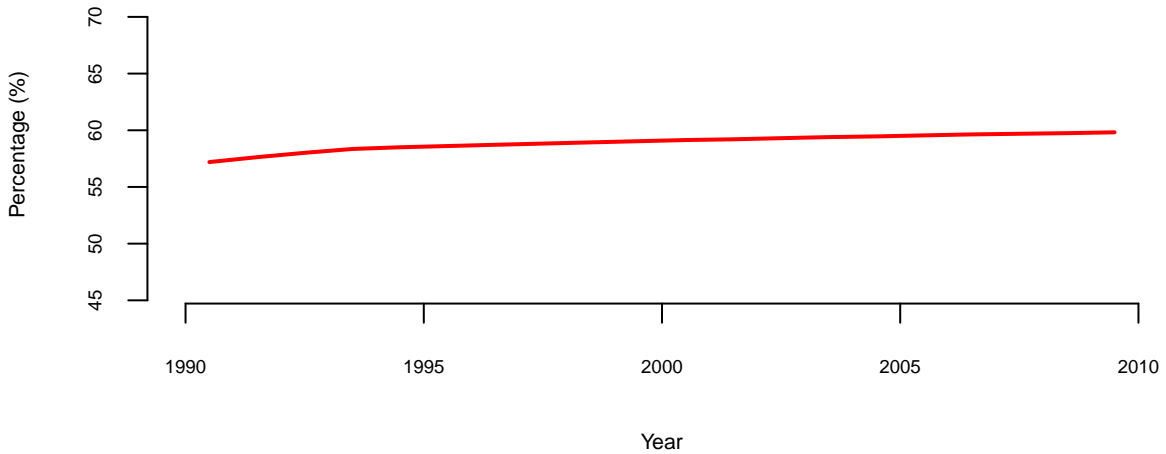

**Cote d'Ivoire**  
**Data, and estimated NMR**

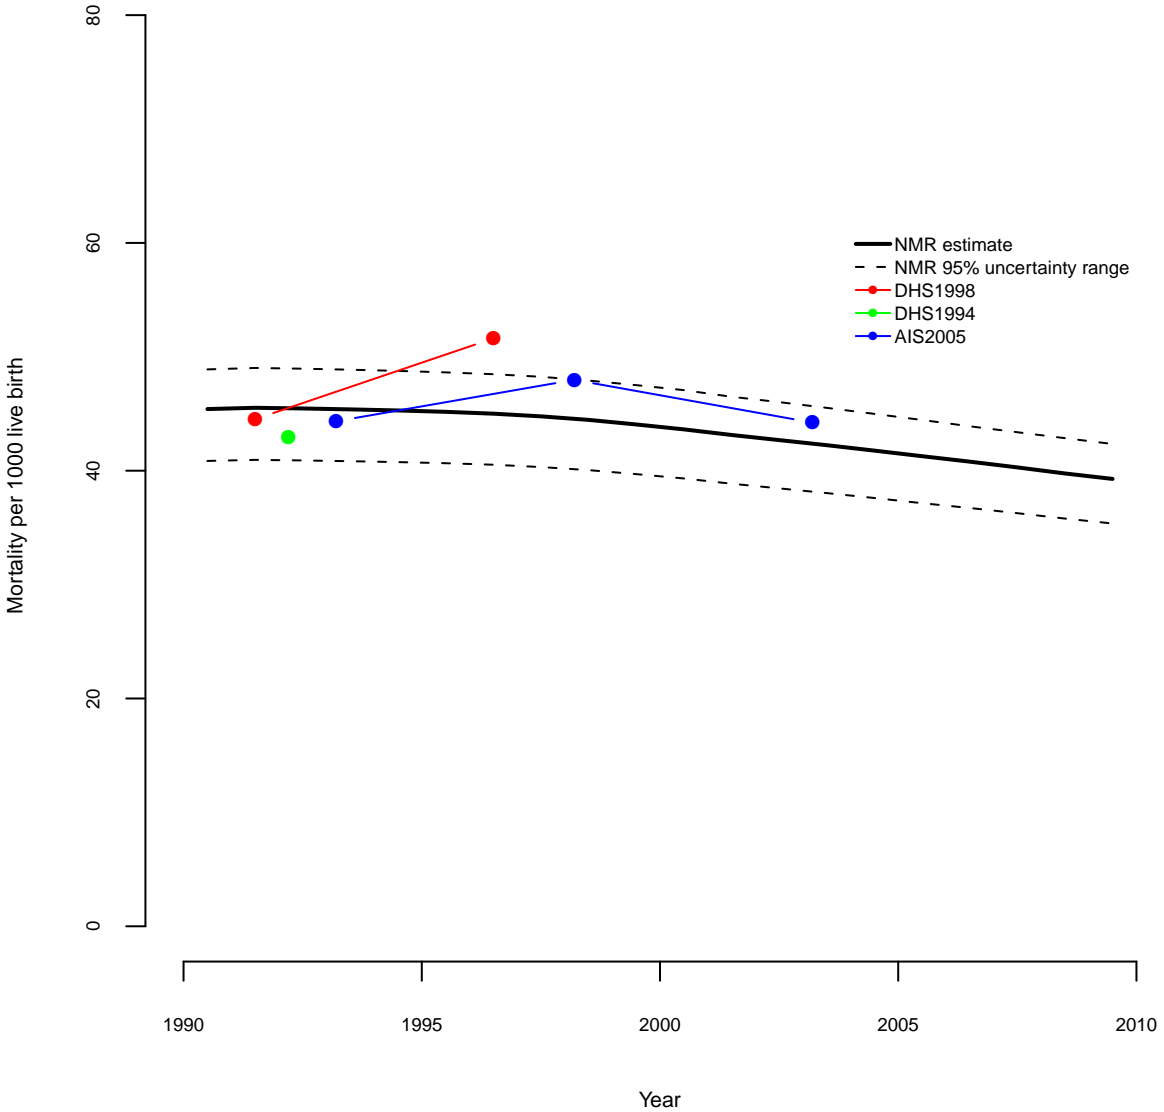

### Cote d'Ivoire NMR and U5MR

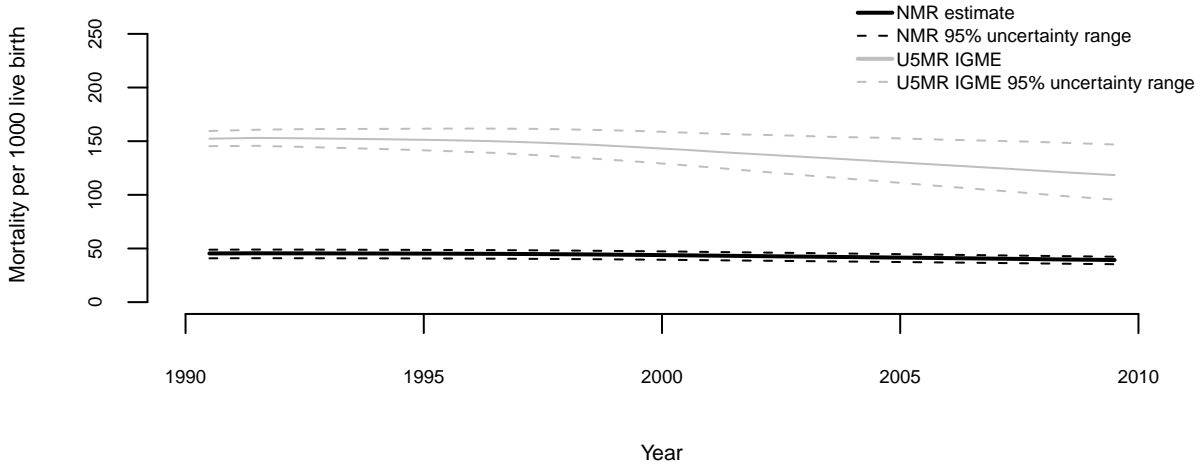

### Cote d'Ivoire NMR as percentage of U5MR

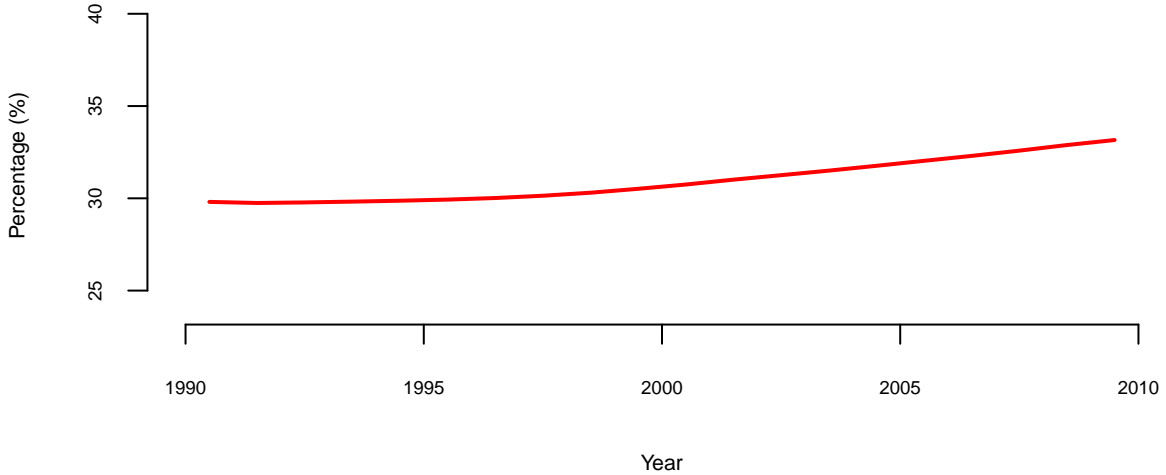

### Croatia Data, and estimated NMR

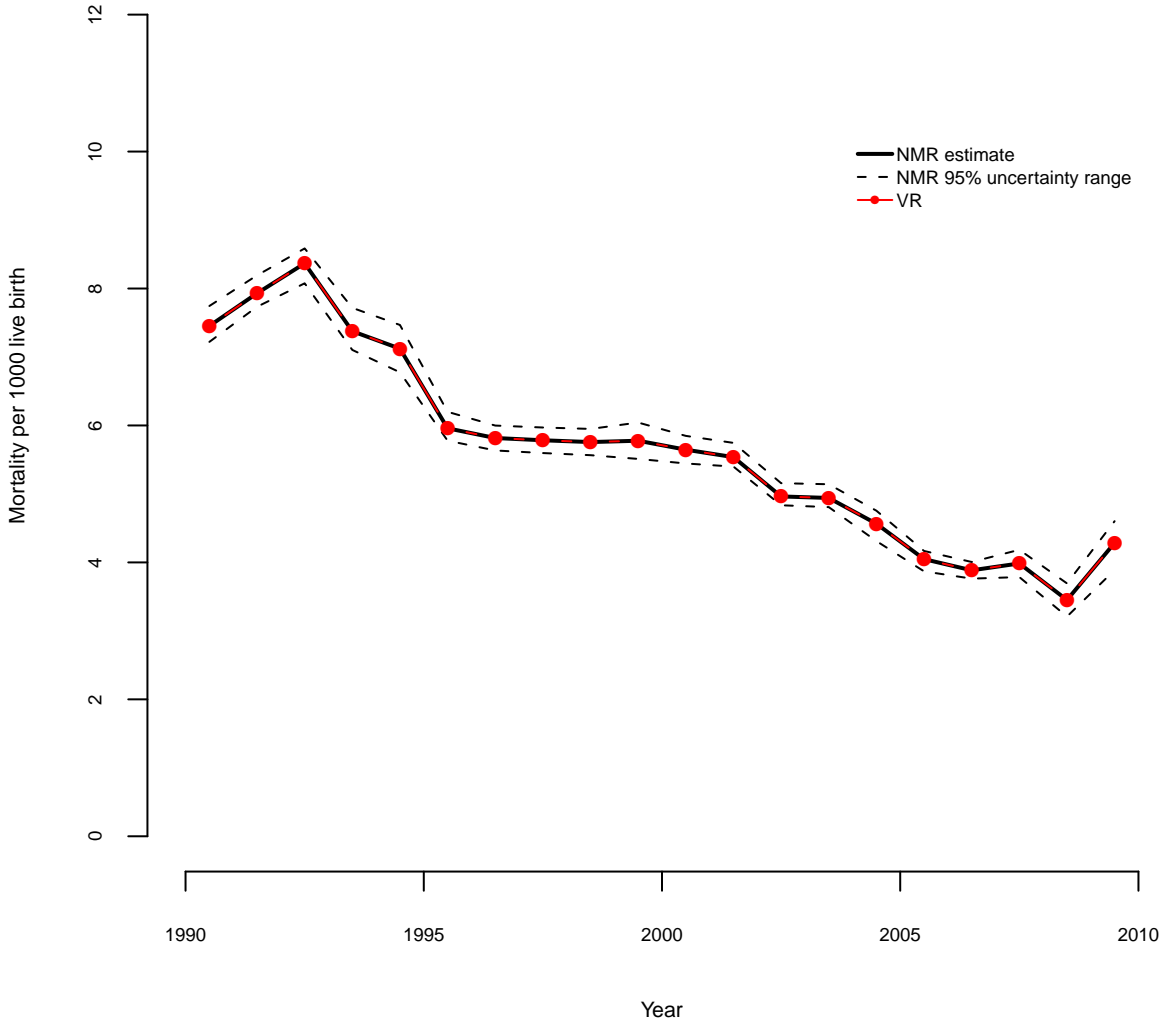

### Croatia NMR and U5MR

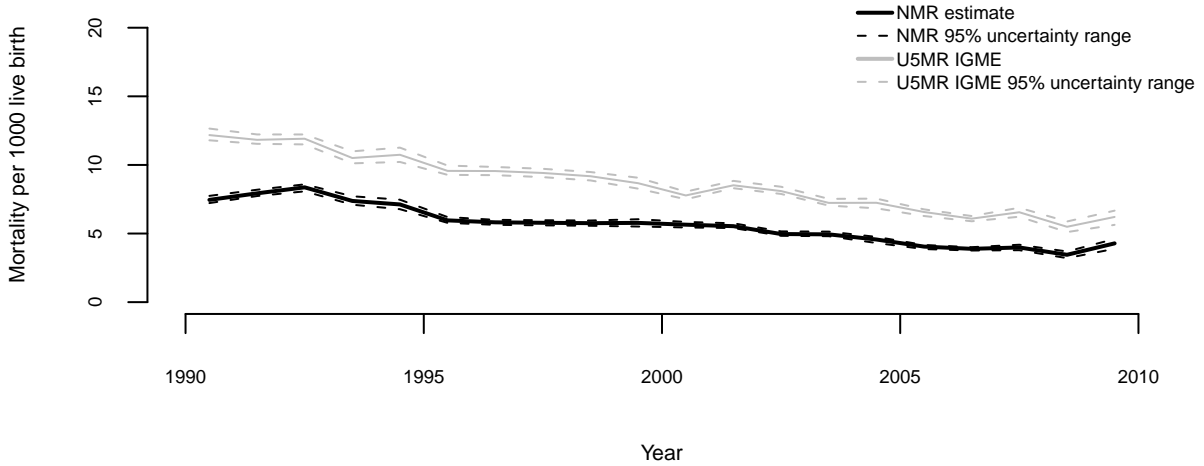

### Croatia NMR as percentage of U5MR

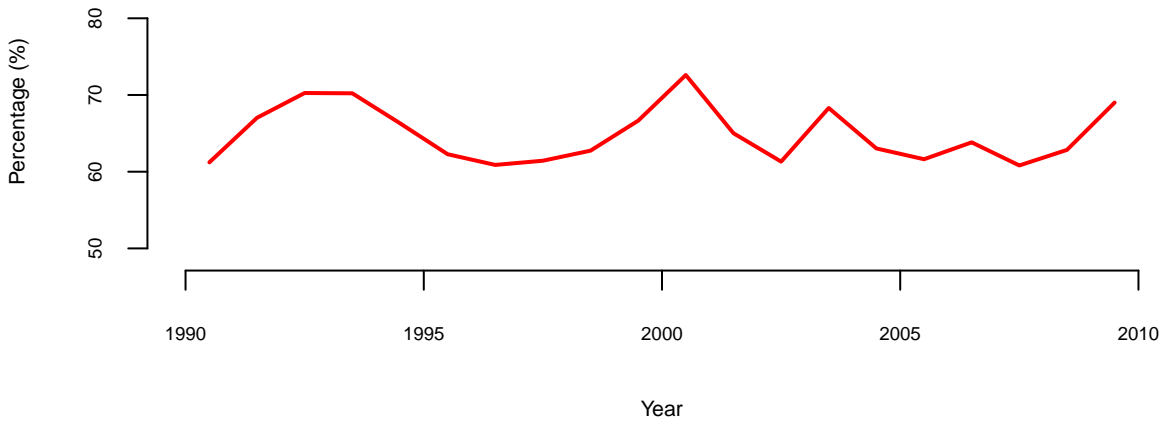

### Cuba Data, and estimated NMR

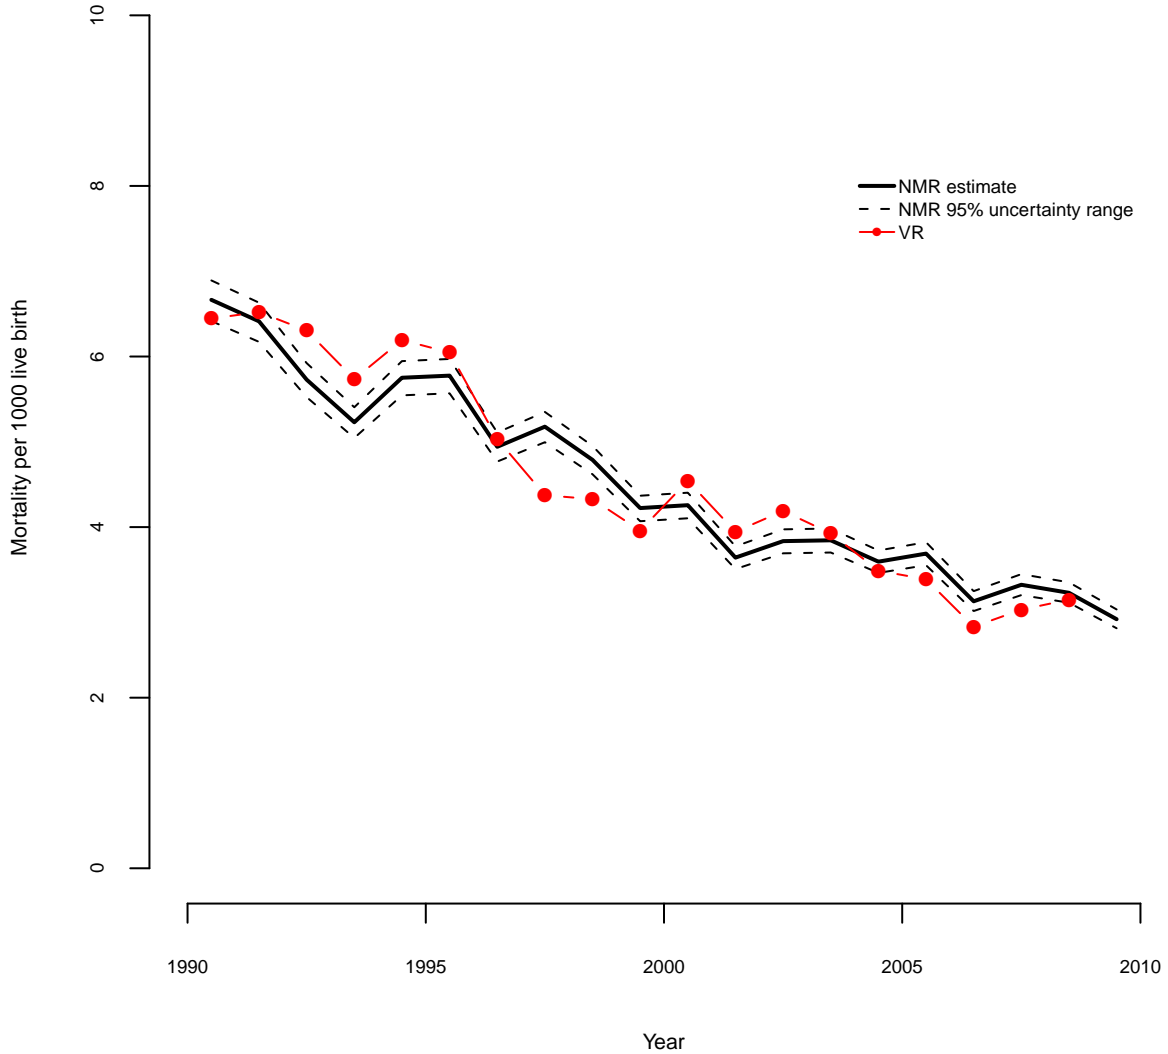

### Cuba NMR and U5MR

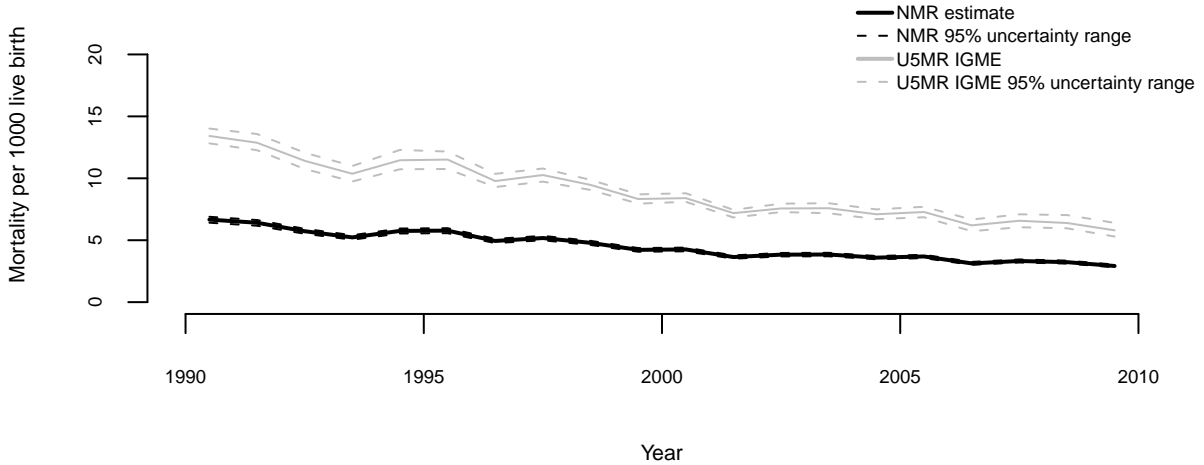

### Cuba NMR as percentage of U5MR

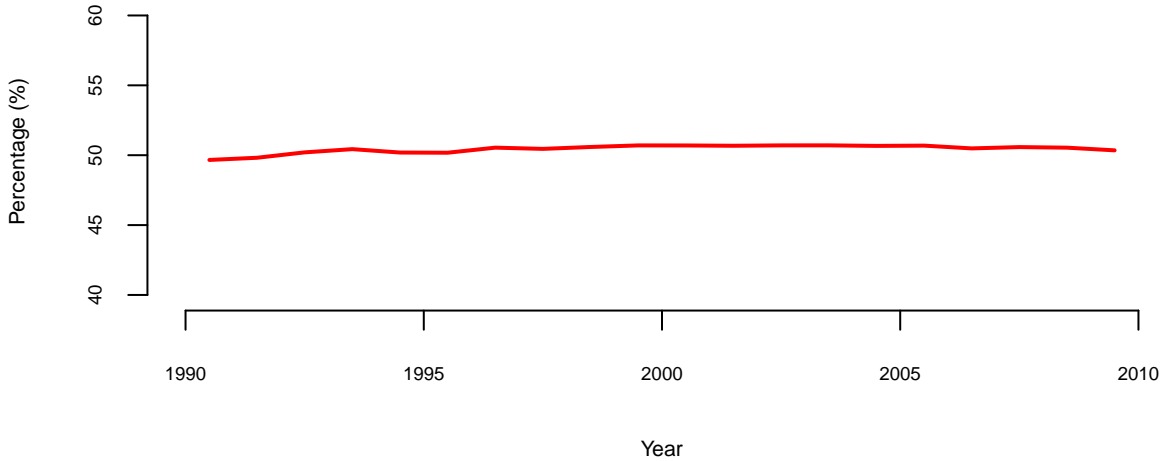



# Cyprus

## Data, and estimated NMR

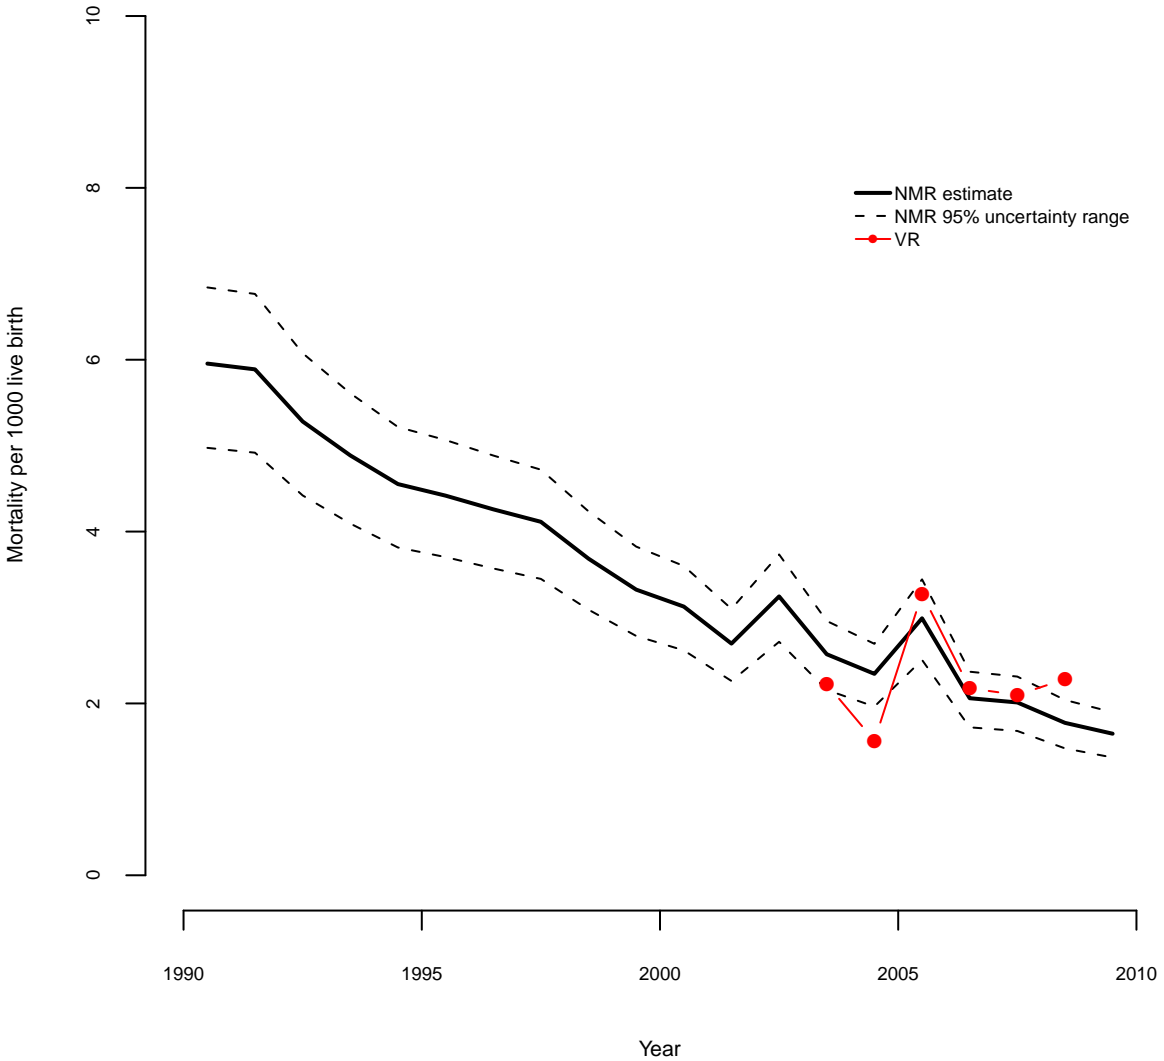

### Cyprus NMR and U5MR

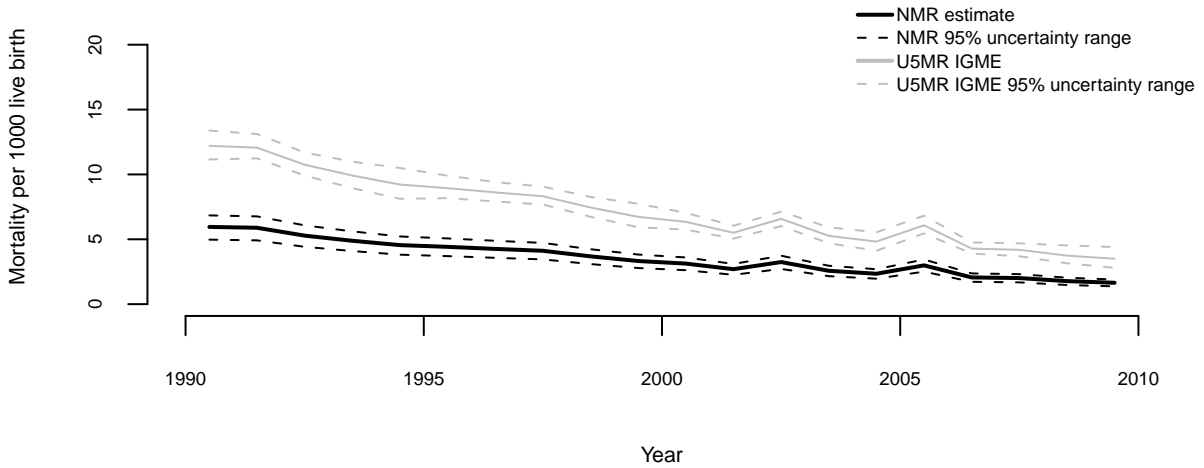

### Cyprus NMR as percentage of U5MR

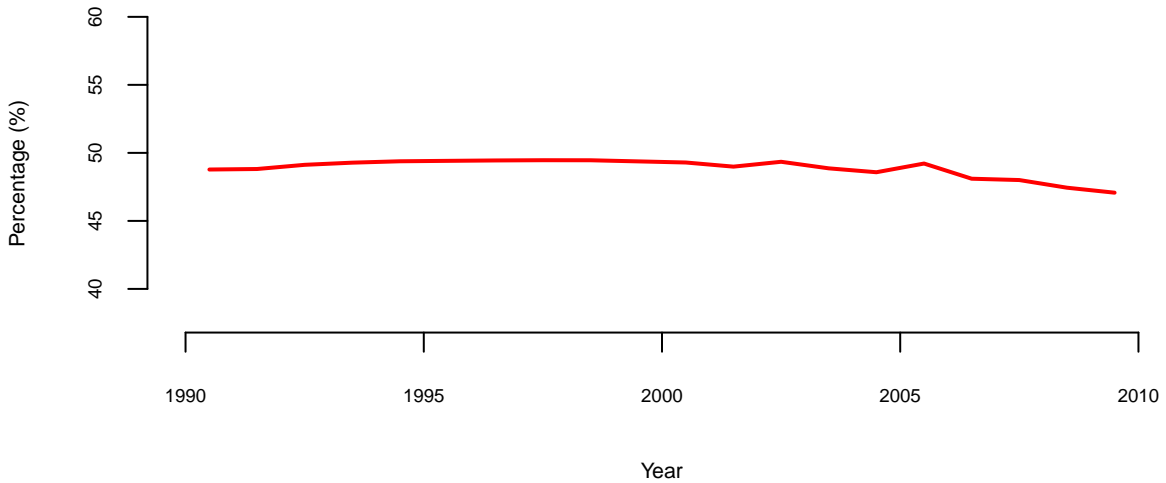

### Czech Republic Data, and estimated NMR

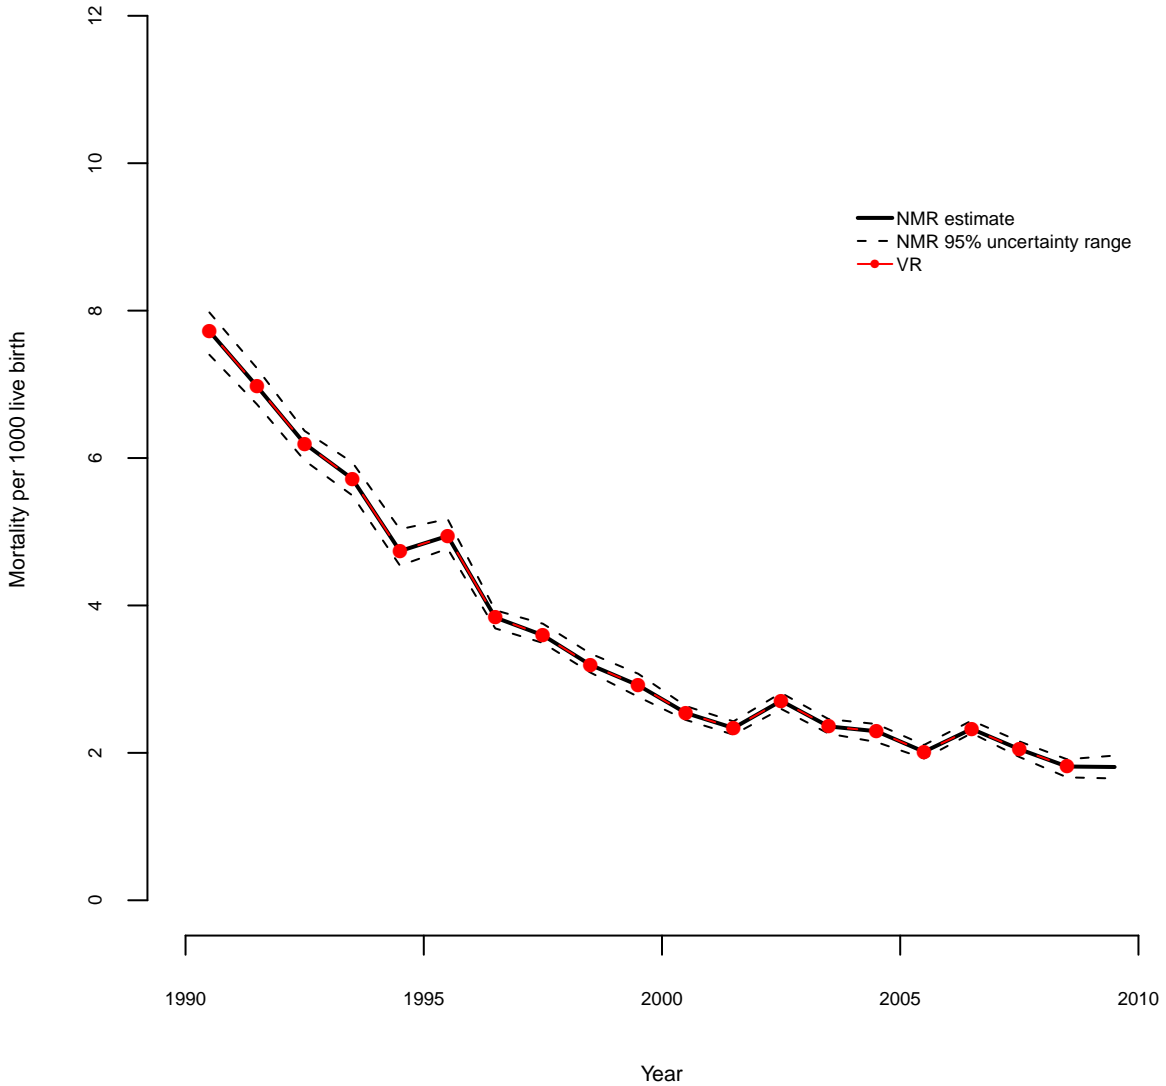

### Czech Republic NMR and U5MR

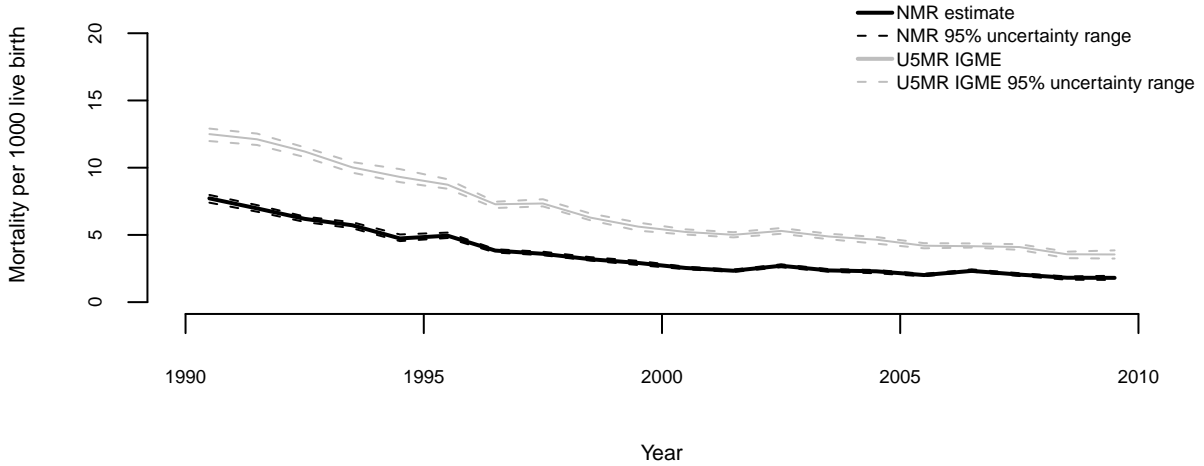

### Czech Republic NMR as percentage of U5MR

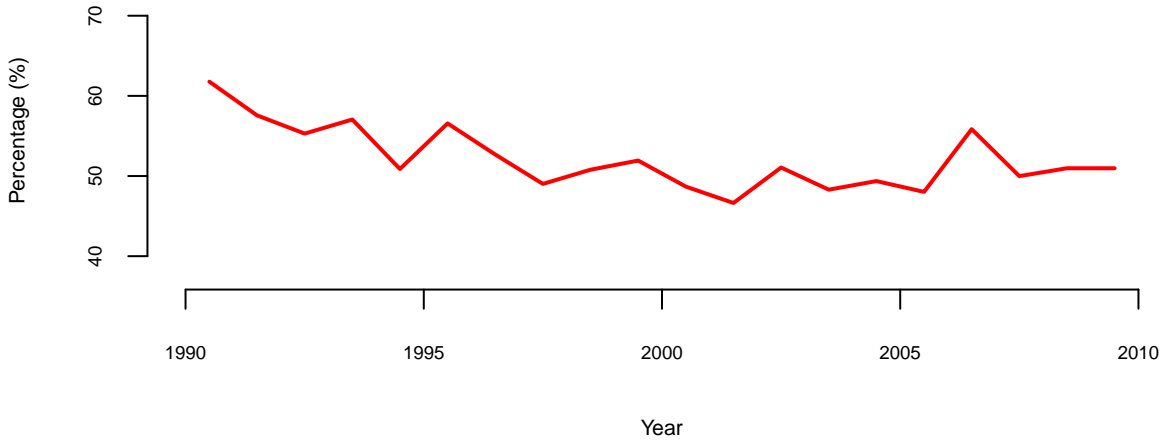

Democratic People's Republic of Korea  
Data, and estimated NMR

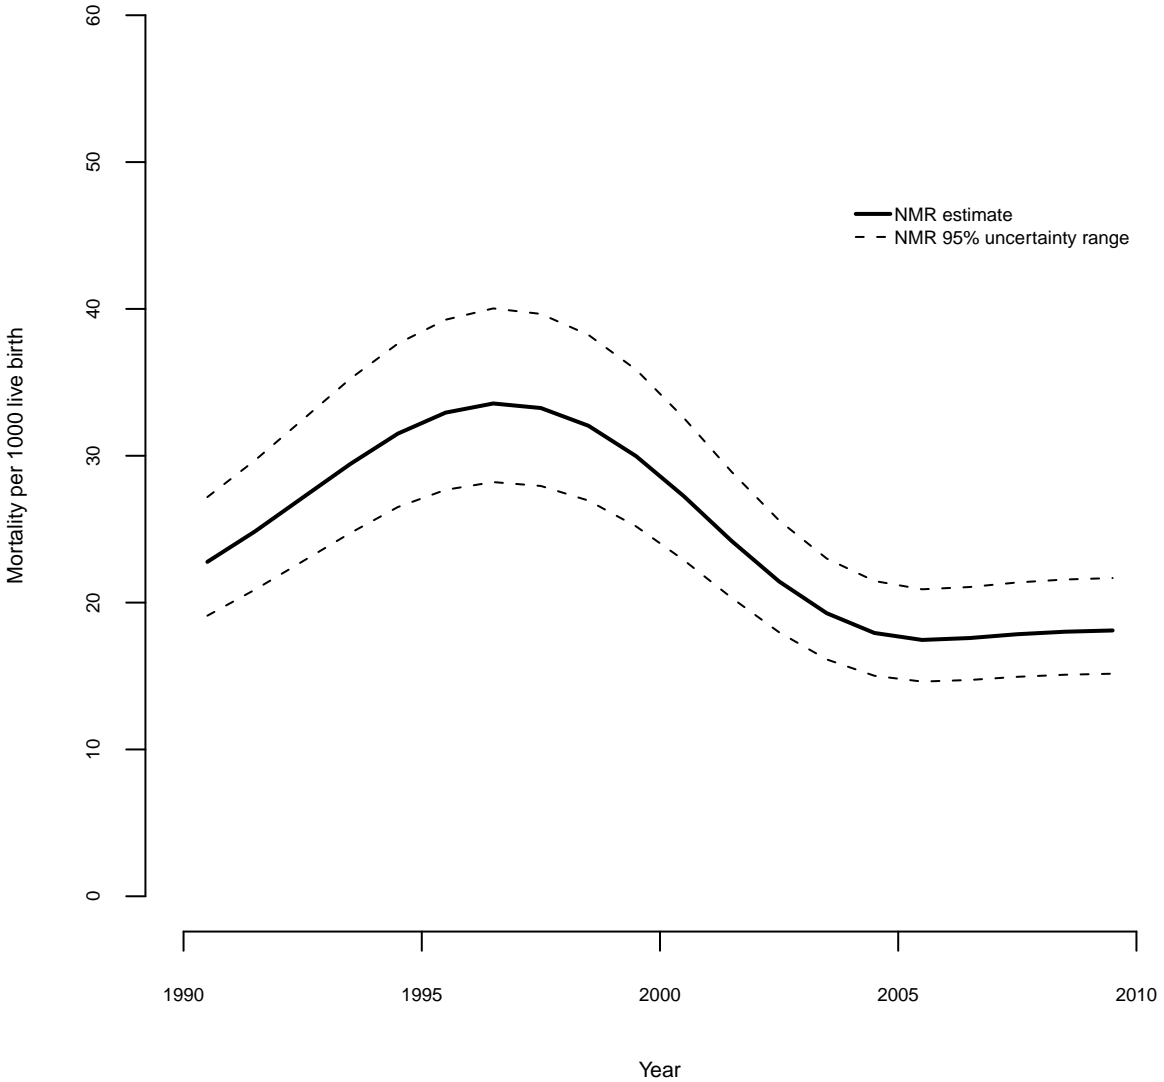

### Democratic People's Republic of Korea NMR and U5MR

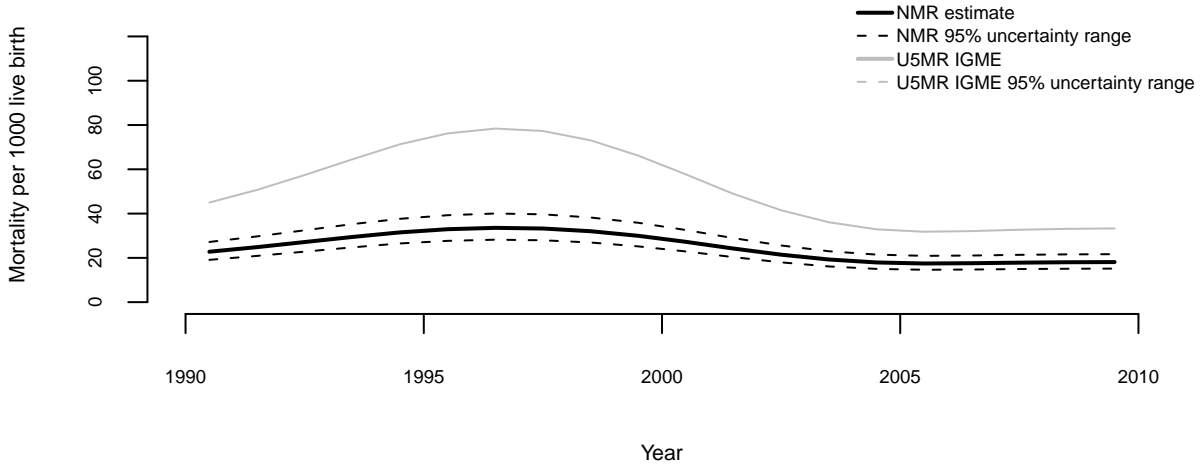

### Democratic People's Republic of Korea NMR as percentage of U5MR

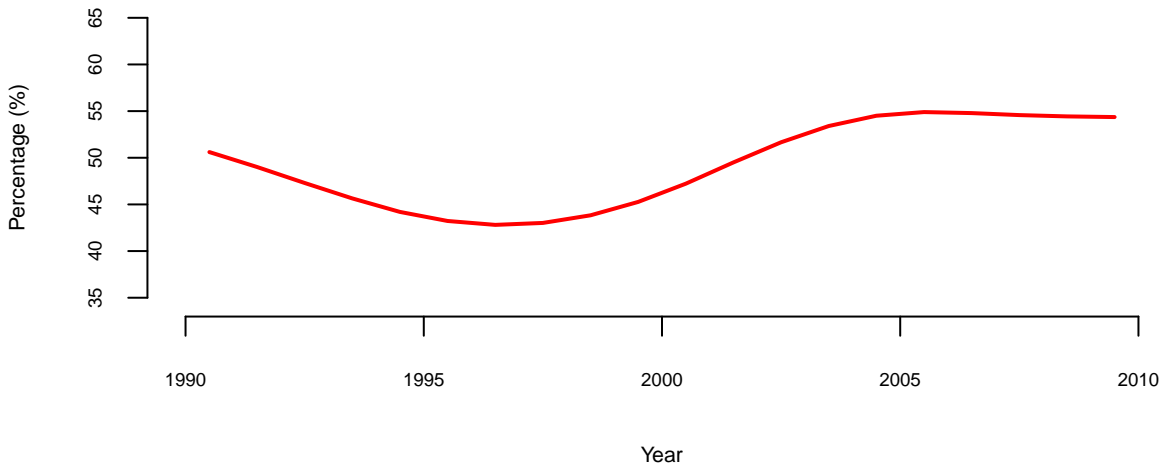

Democratic Republic of the Congo  
Data, and estimated NMR

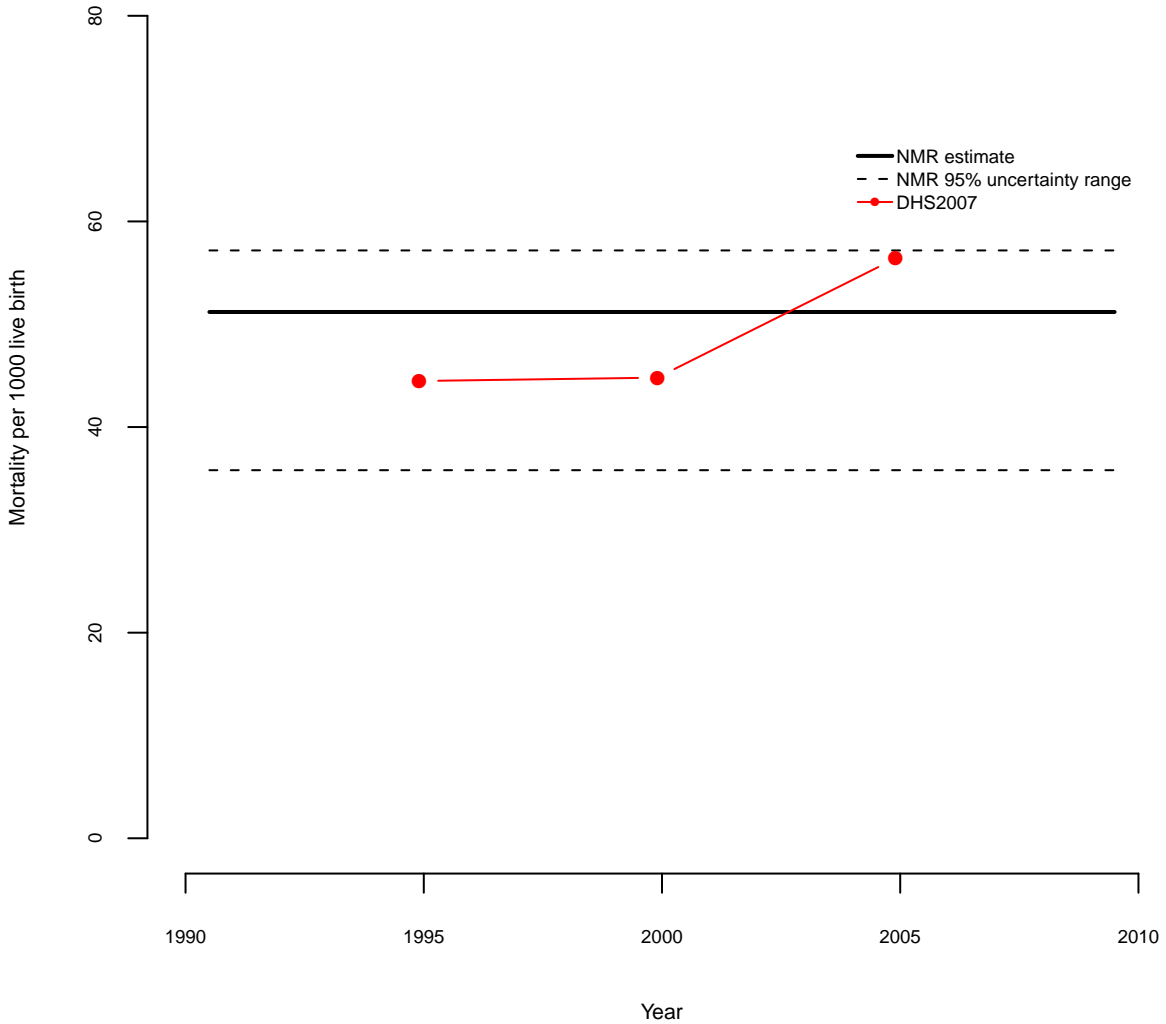

### Democratic Republic of the Congo NMR and U5MR

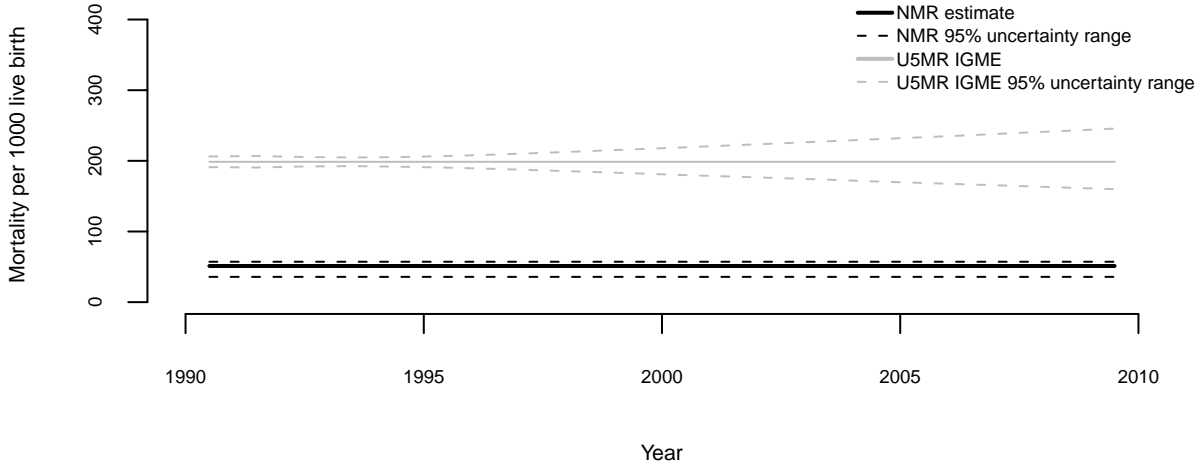

### Democratic Republic of the Congo NMR as percentage of U5MR

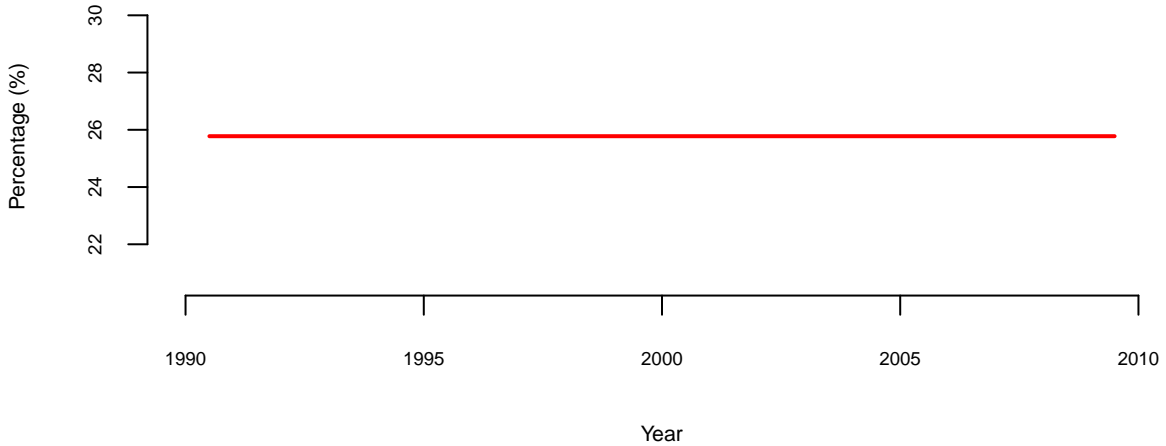



Denmark  
Data, and estimated NMR

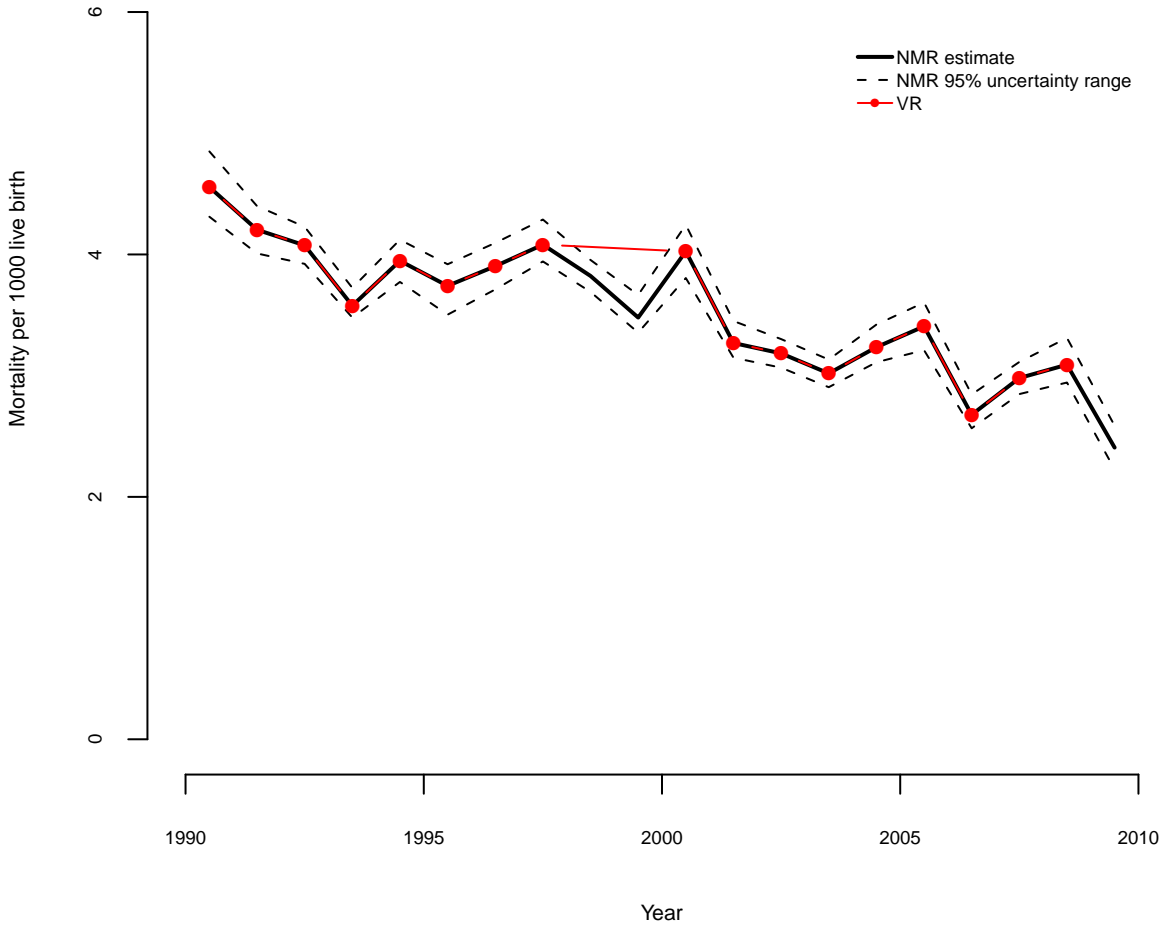

### Denmark NMR and U5MR

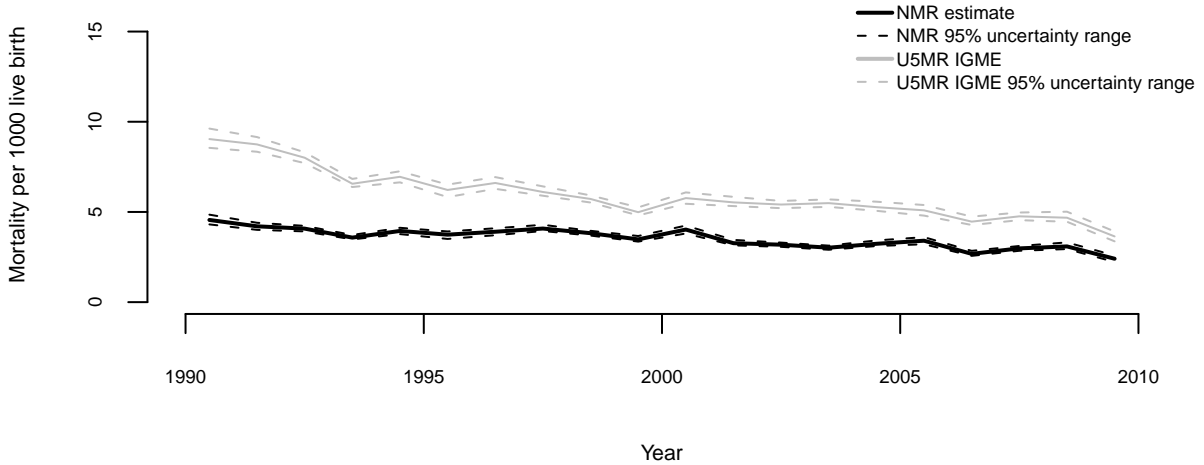

### Denmark NMR as percentage of U5MR

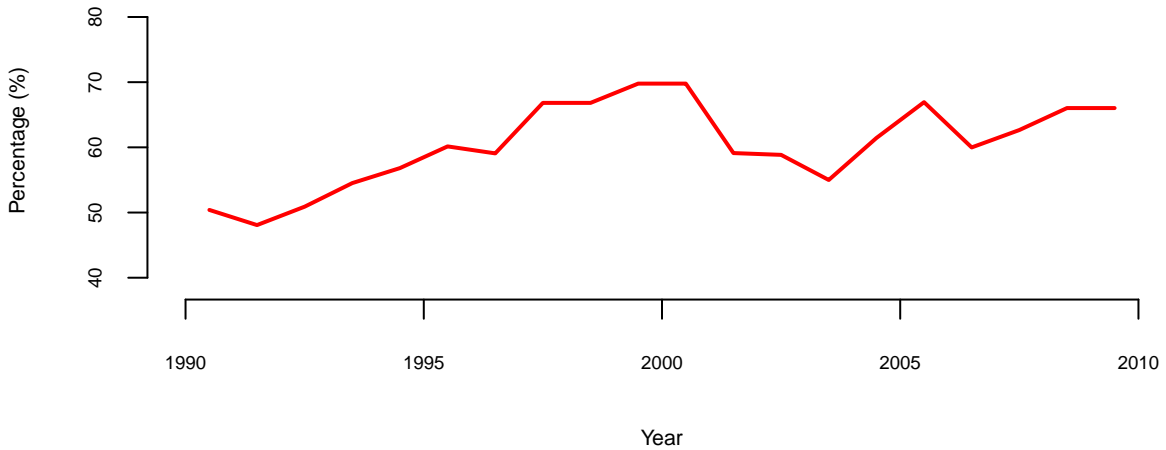

### Djibouti Data, and estimated NMR

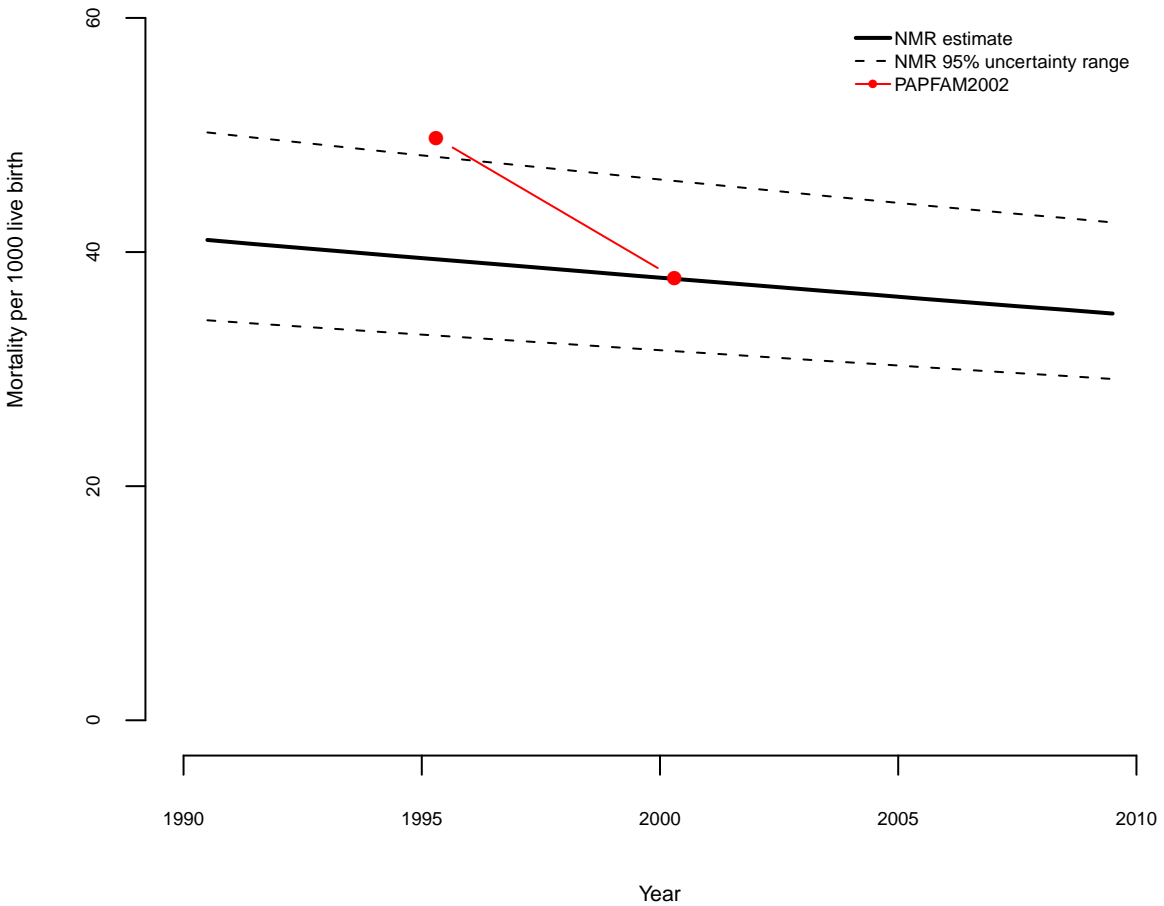

### Djibouti NMR and U5MR

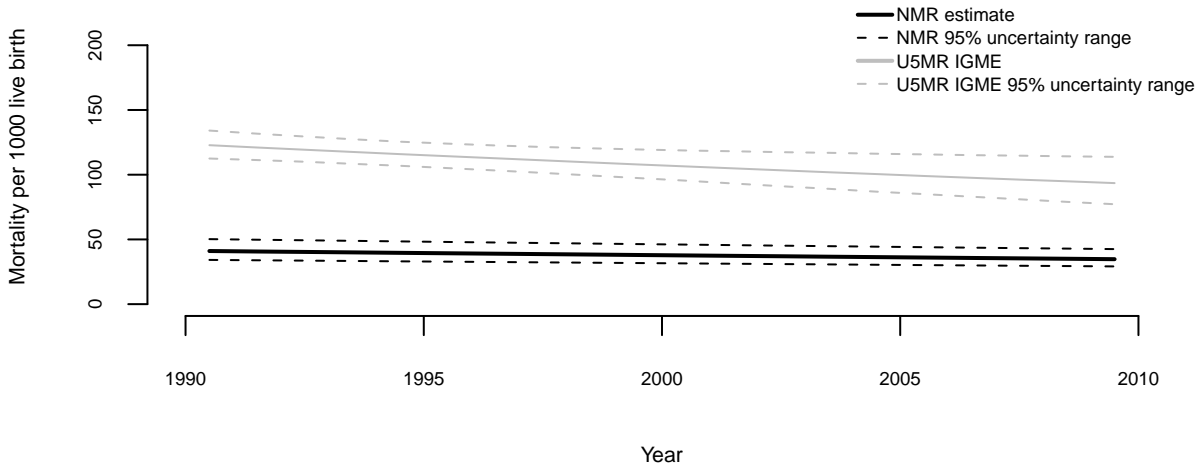

### Djibouti NMR as percentage of U5MR

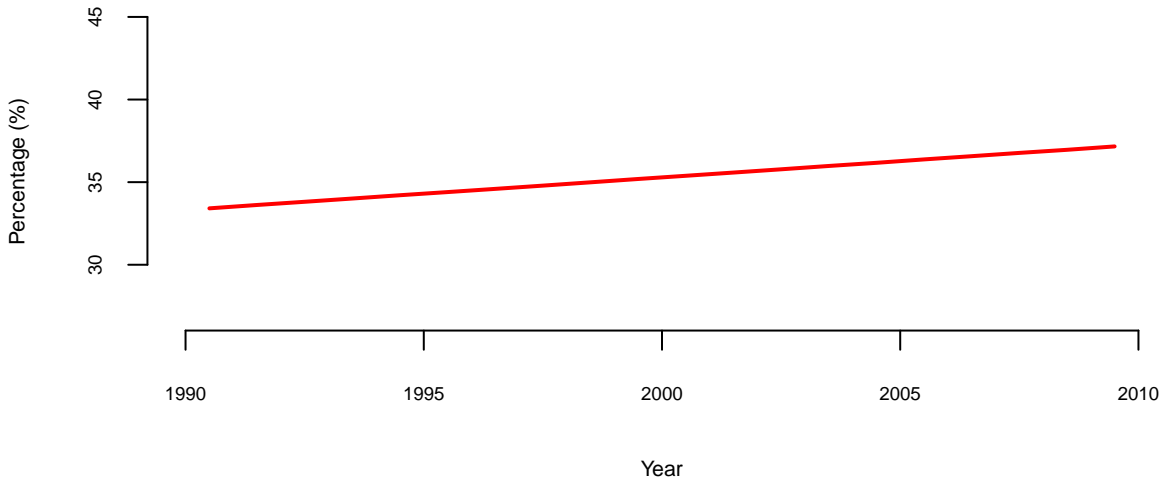

### Dominica Data, and estimated NMR

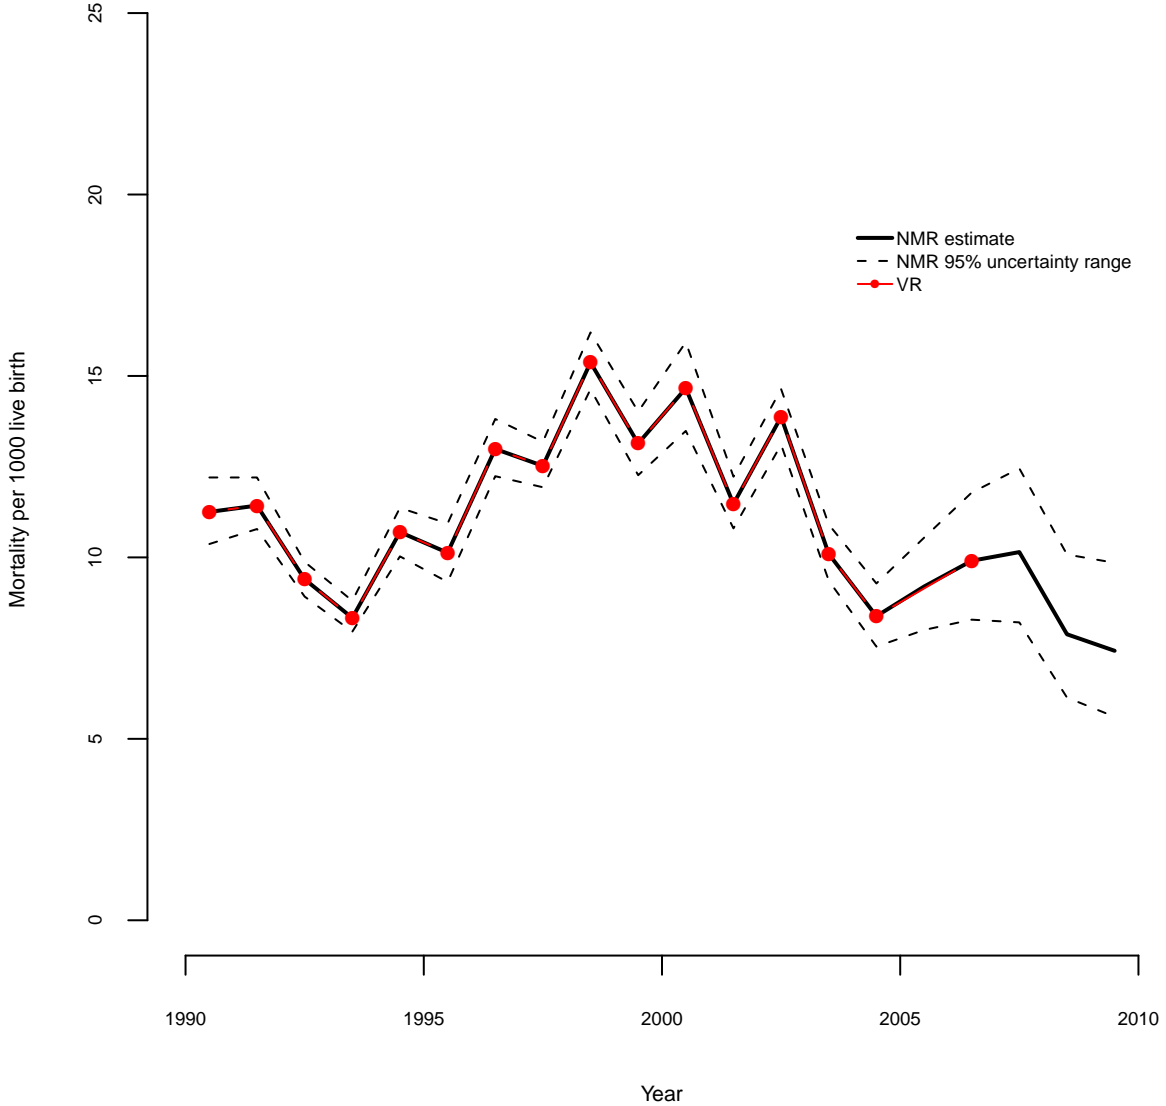

### Dominica NMR and U5MR

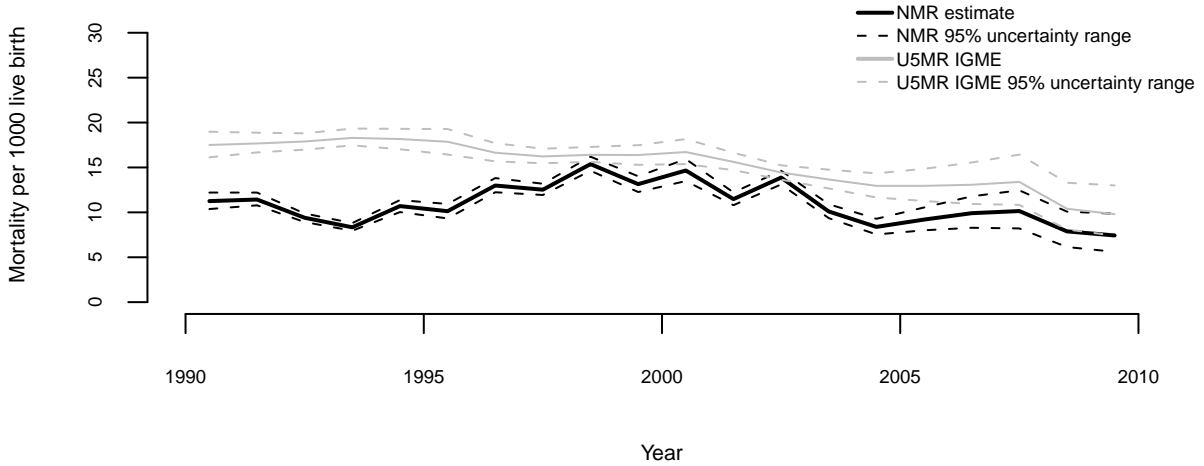

### Dominica NMR as percentage of U5MR

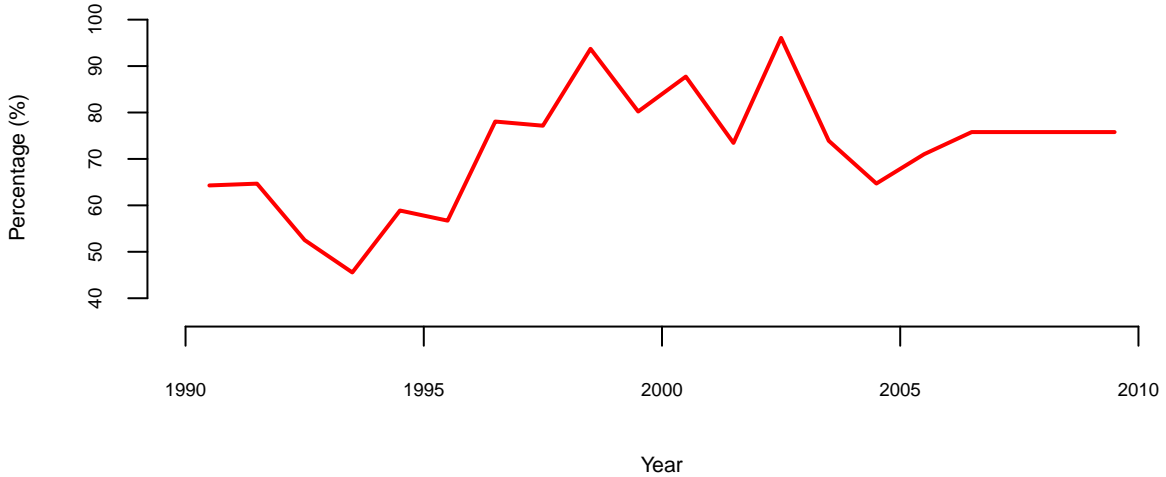

### Dominican Republic Data, and estimated NMR

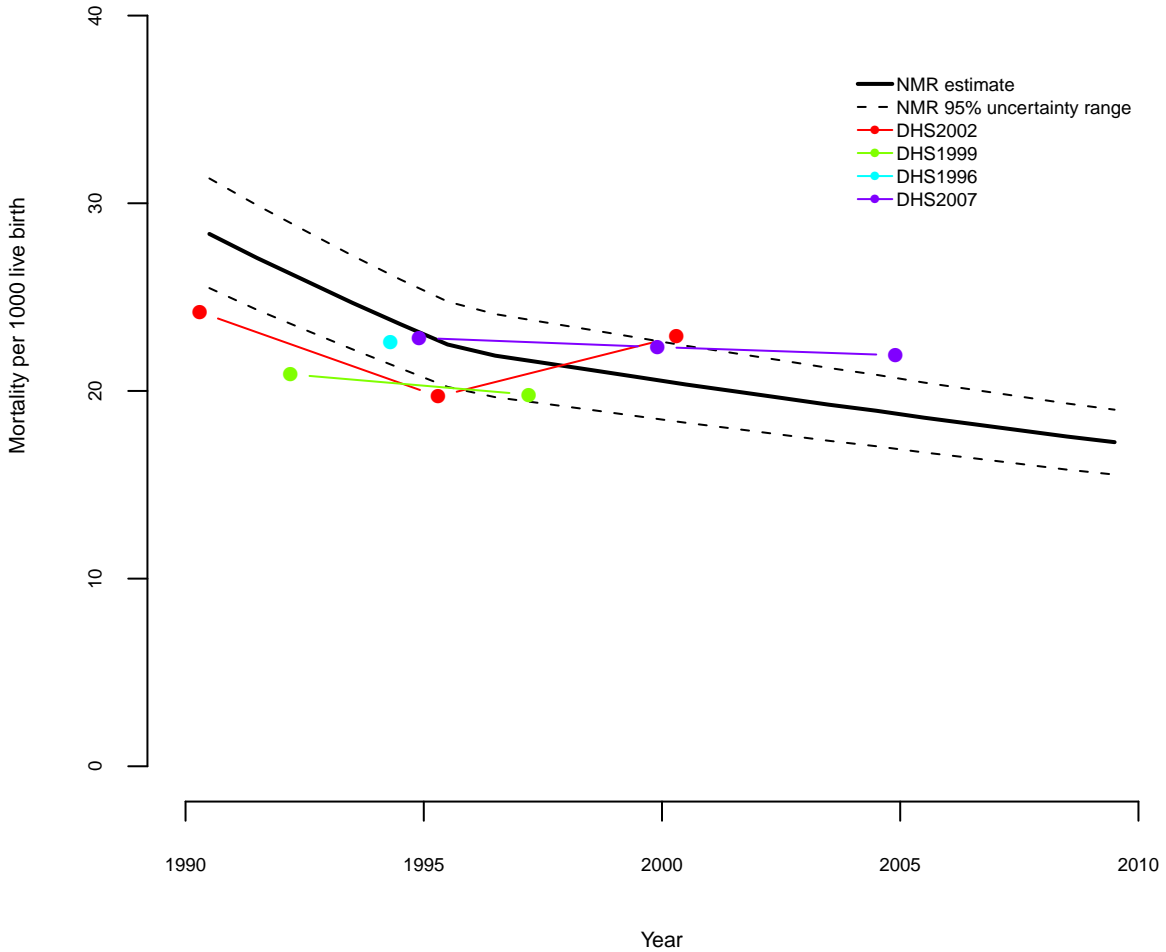

### Dominican Republic NMR and U5MR

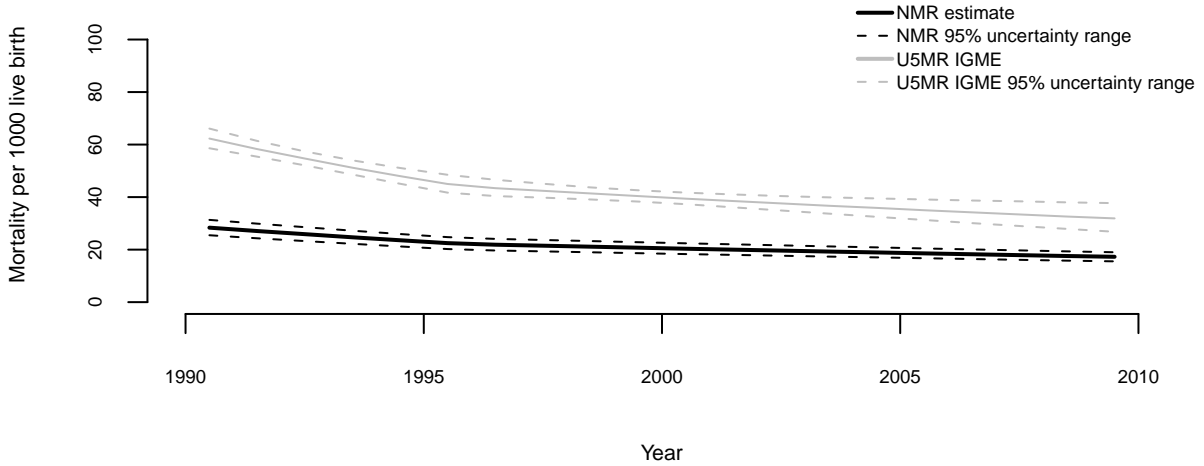

### Dominican Republic NMR as percentage of U5MR

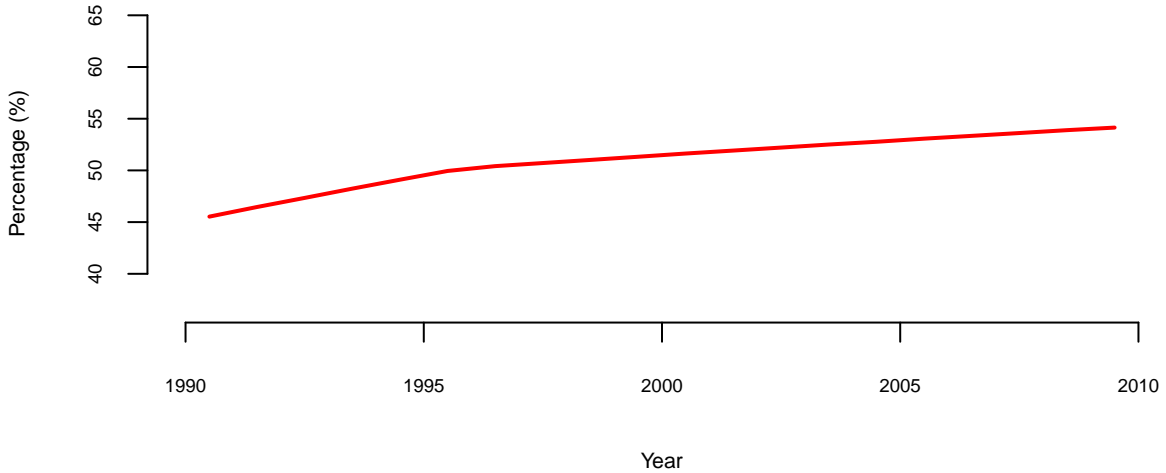



### Ecuador Data, and estimated NMR

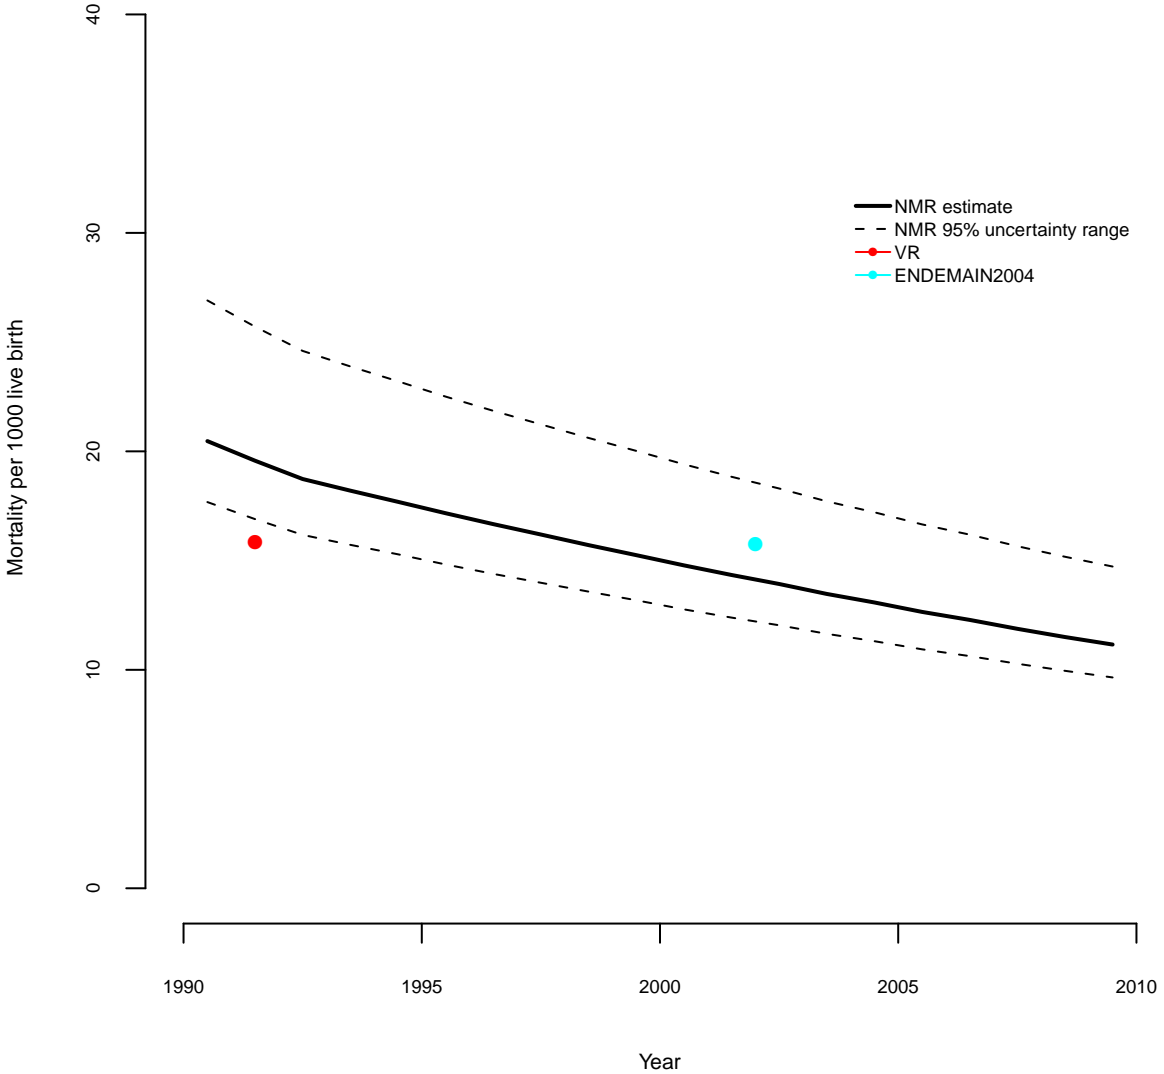

### Ecuador NMR and U5MR

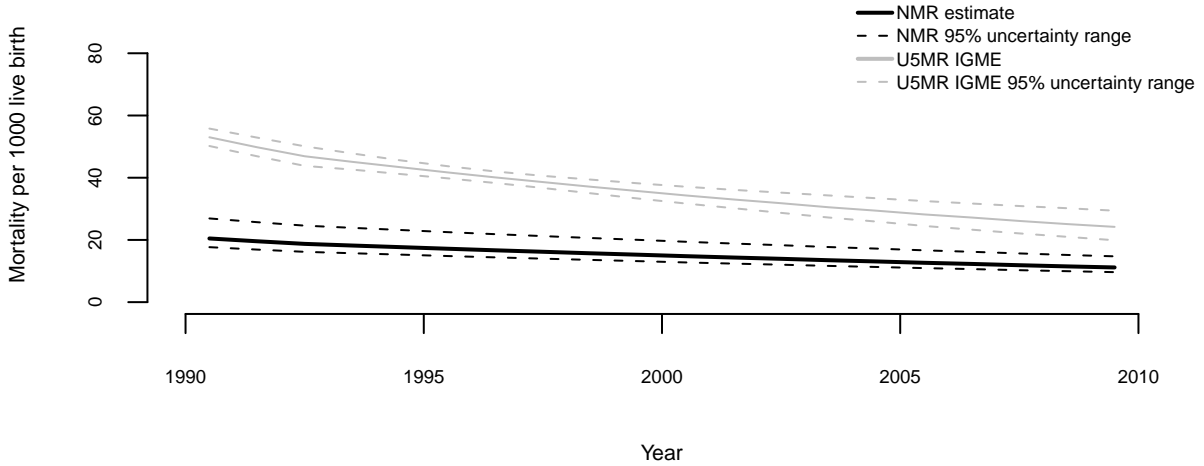

### Ecuador NMR as percentage of U5MR

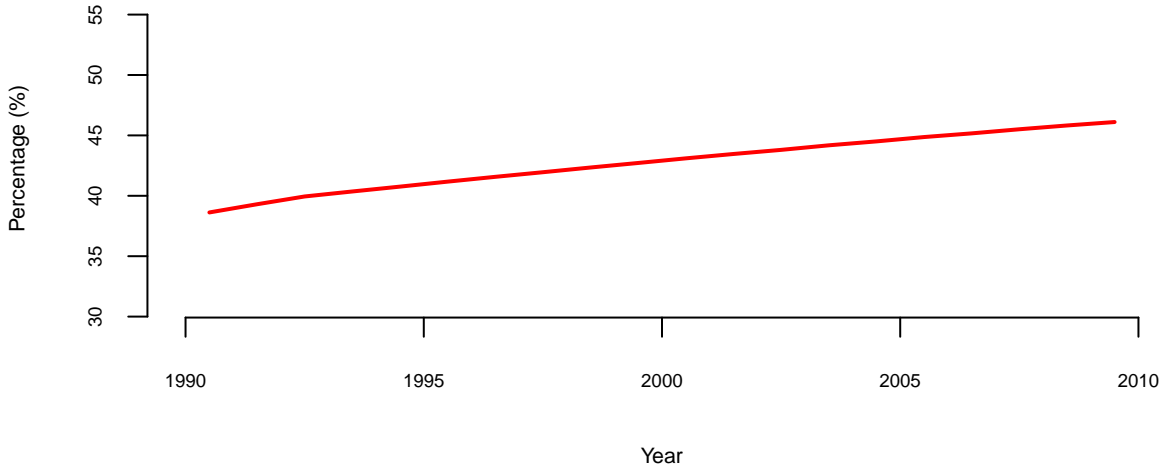

# Egypt

## Data, and estimated NMR

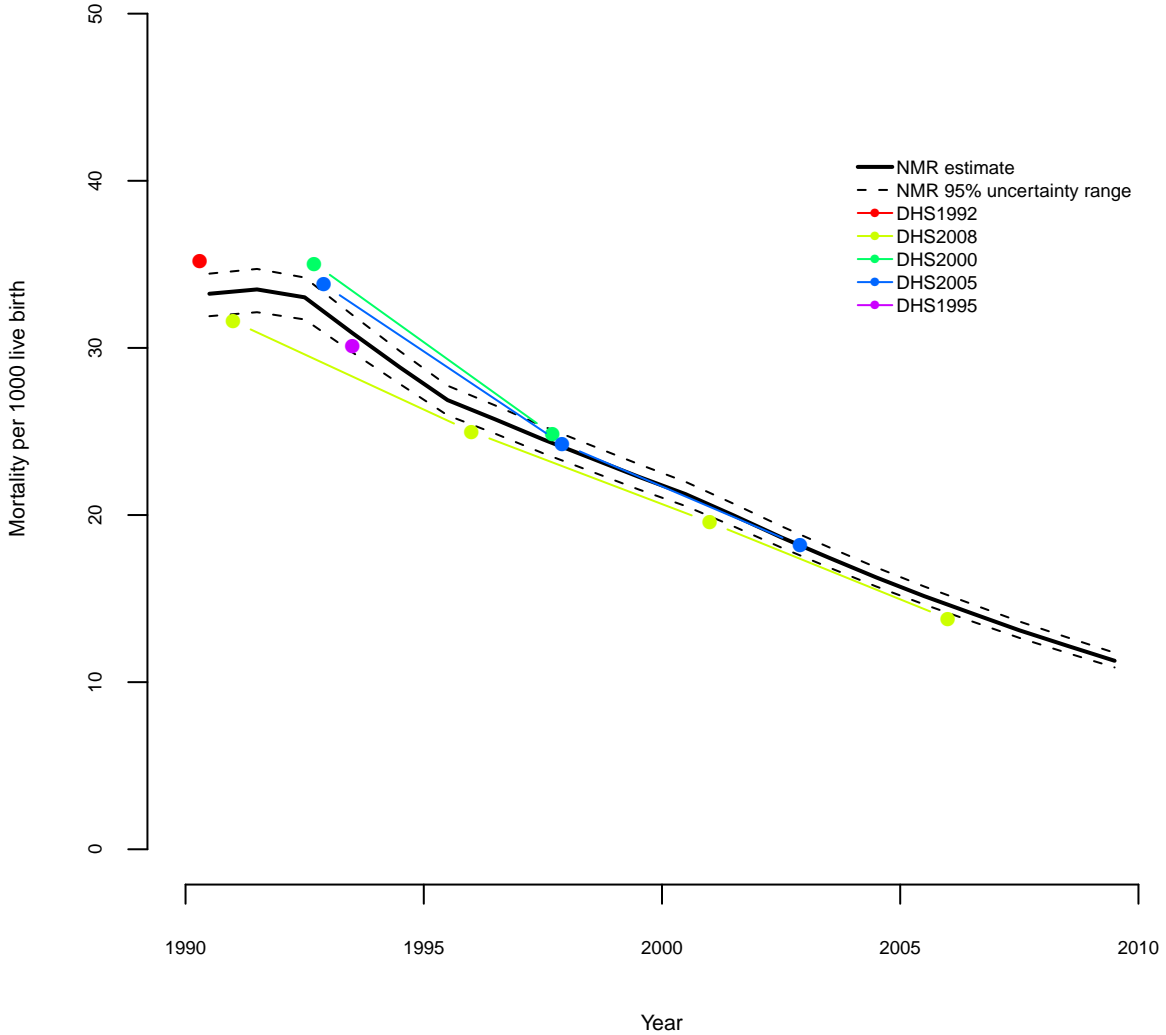

### Egypt NMR and U5MR

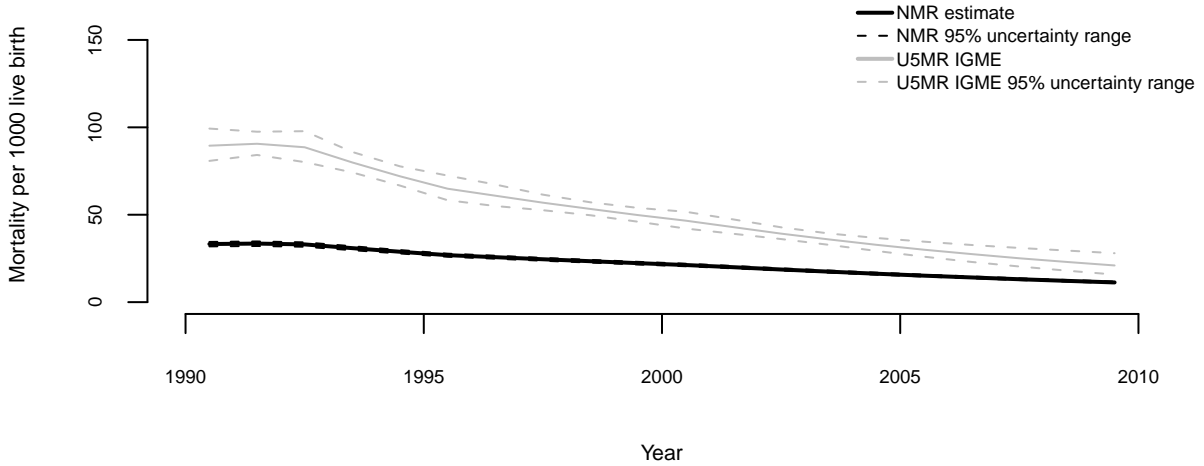

### Egypt NMR as percentage of U5MR

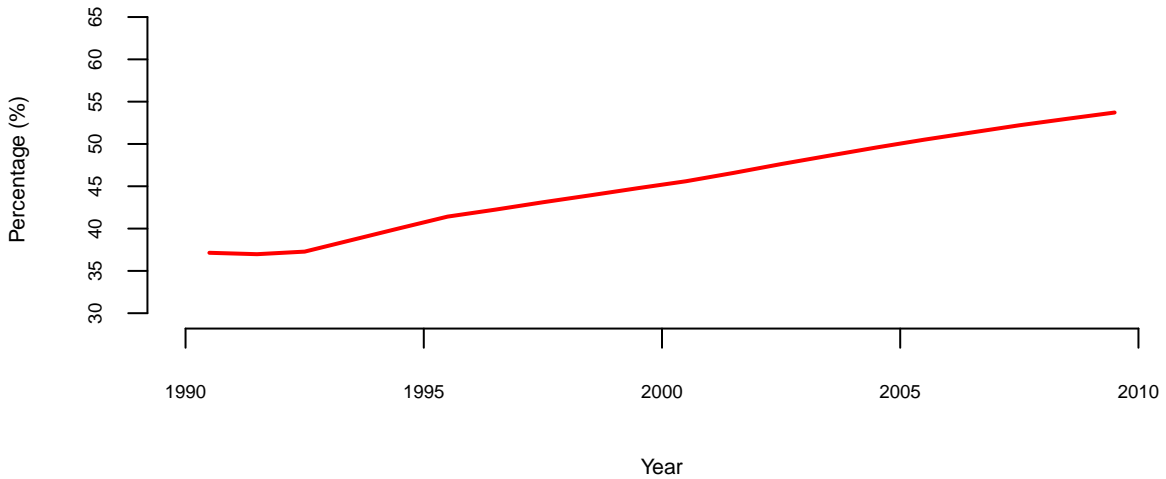

**EI Salvador**  
**Data, and estimated NMR**

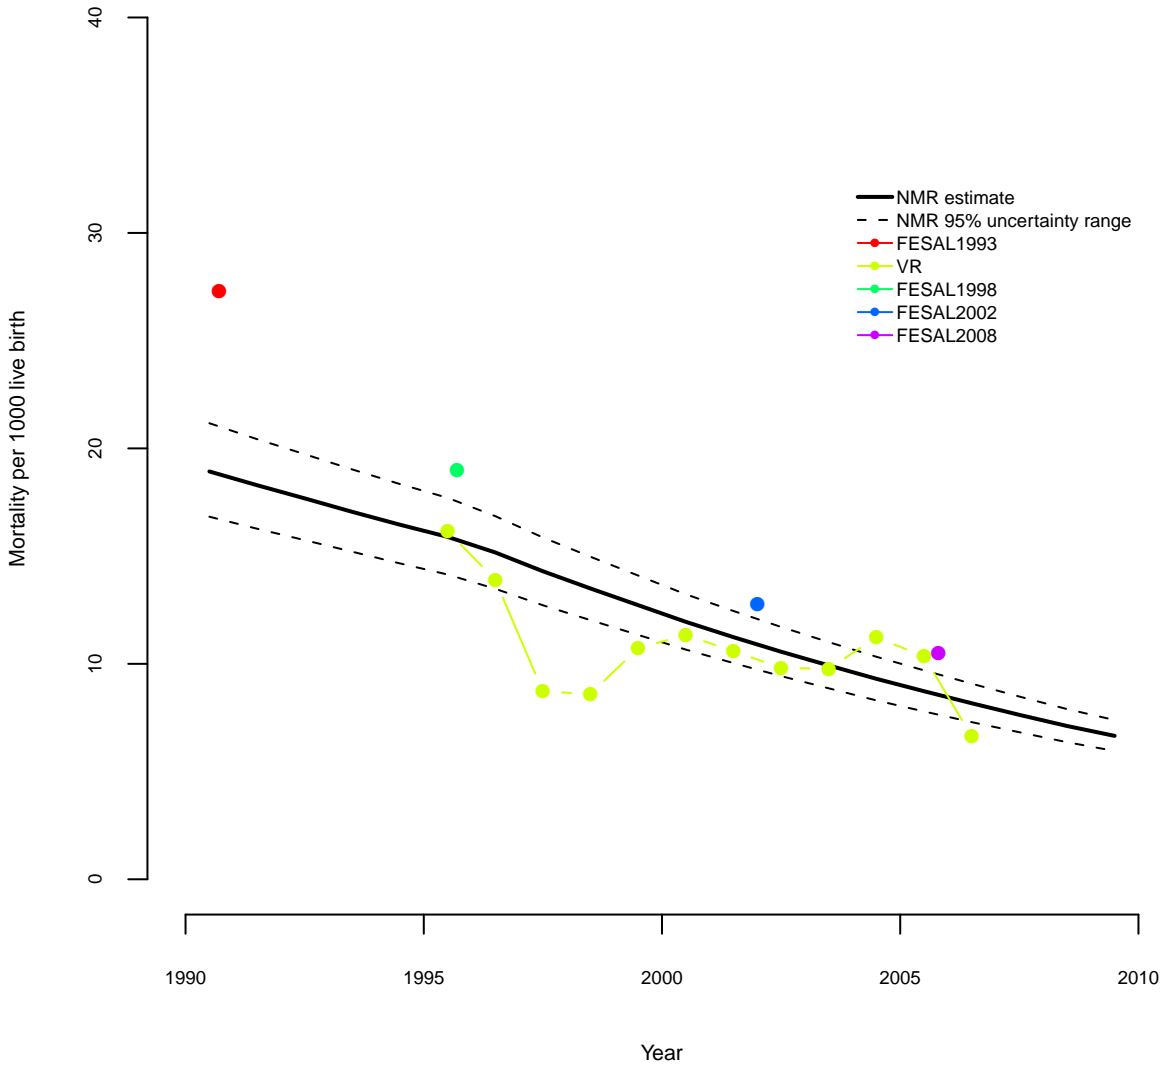

### EI Salvador NMR and U5MR

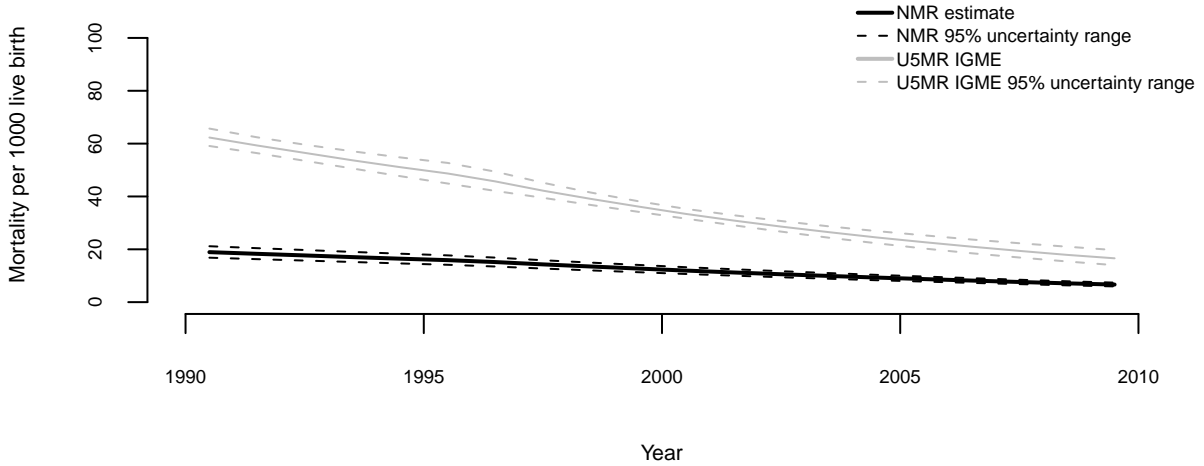

### EI Salvador NMR as percentage of U5MR

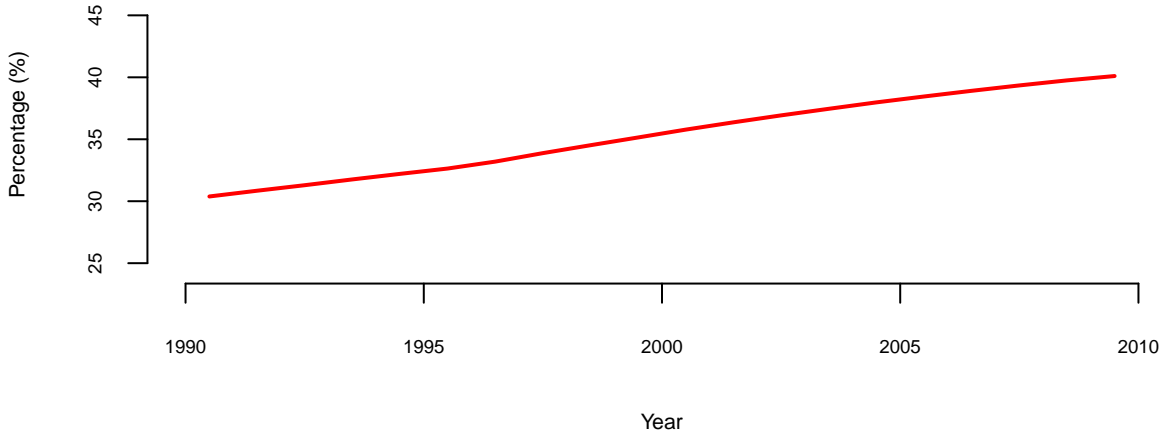

**Equatorial Guinea  
Data, and estimated NMR**

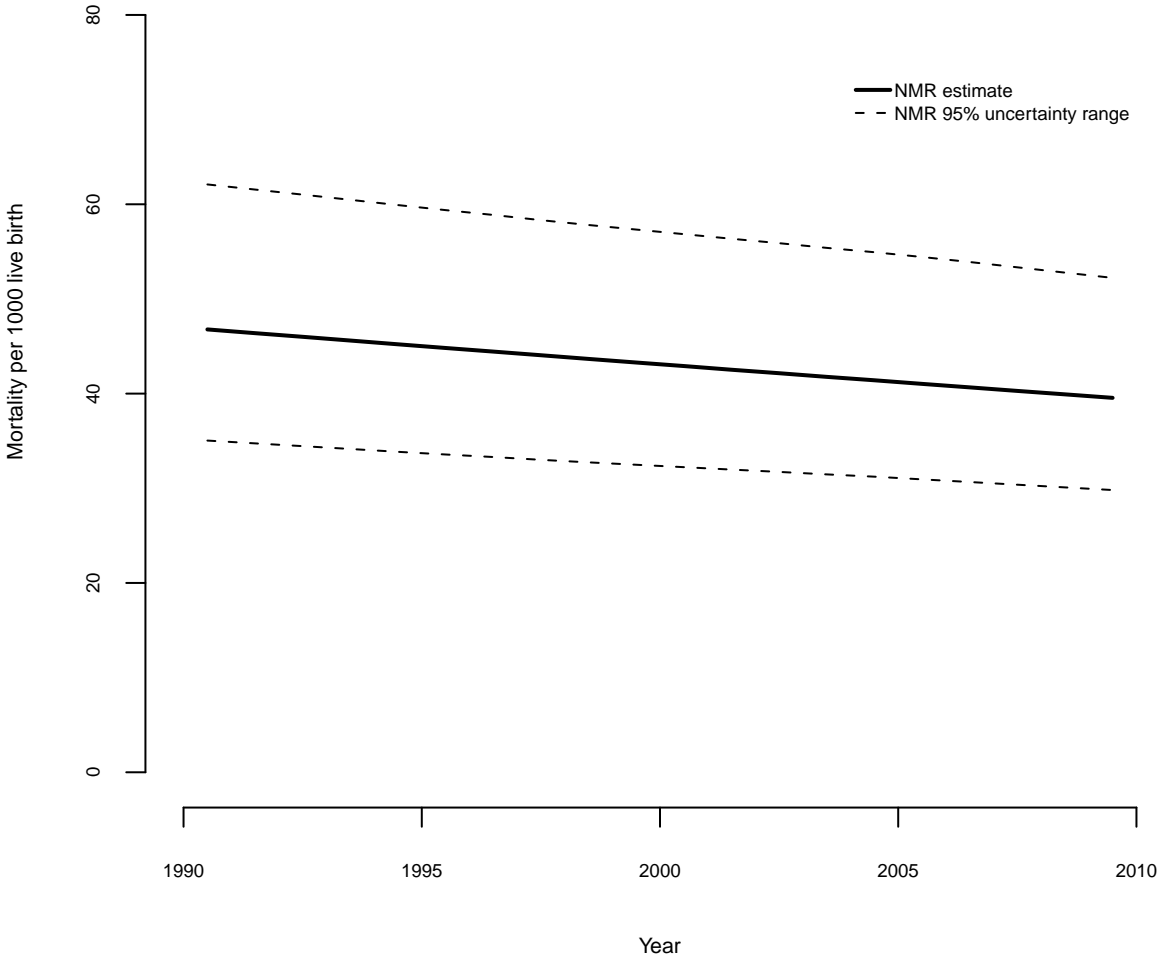

### Equatorial Guinea NMR and U5MR

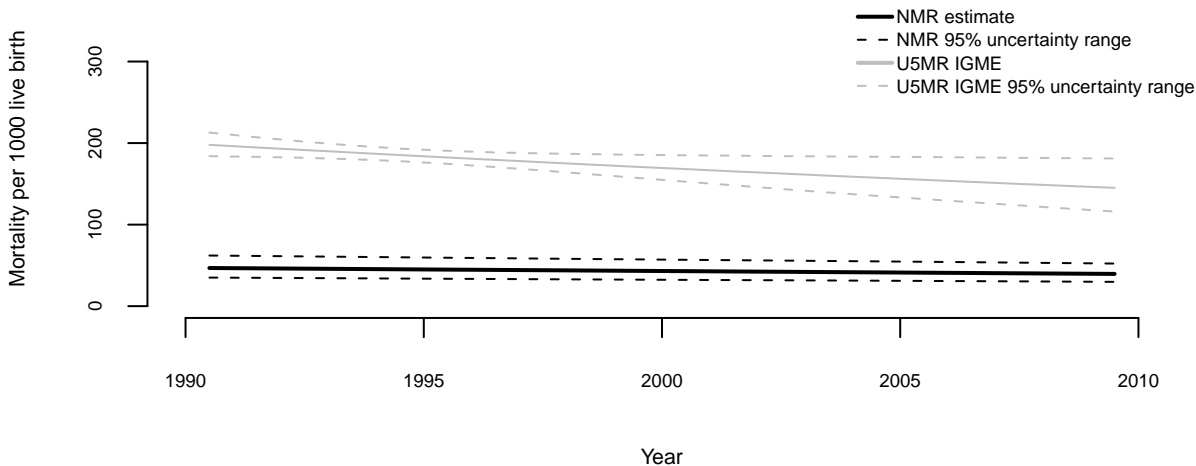

### Equatorial Guinea NMR as percentage of U5MR

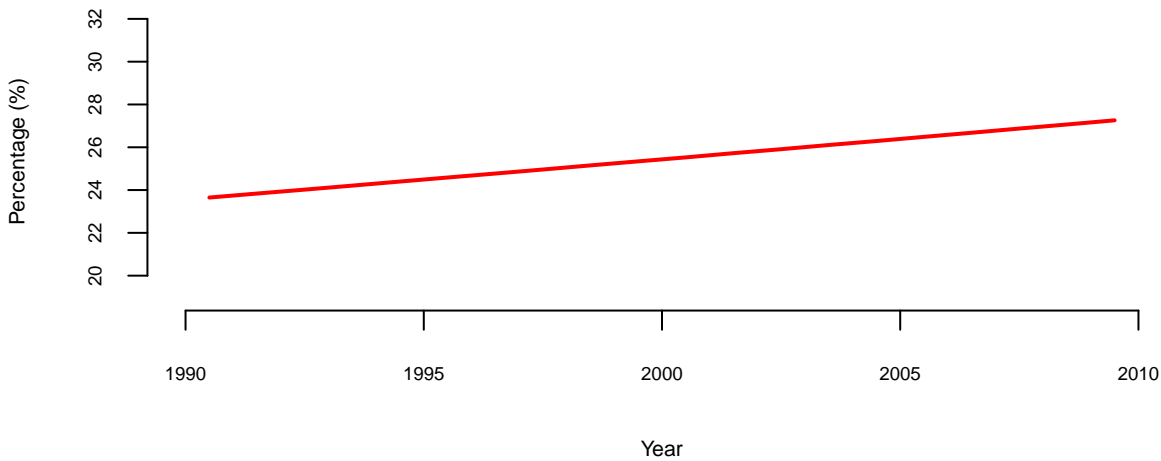



# Eritrea

## Data, and estimated NMR

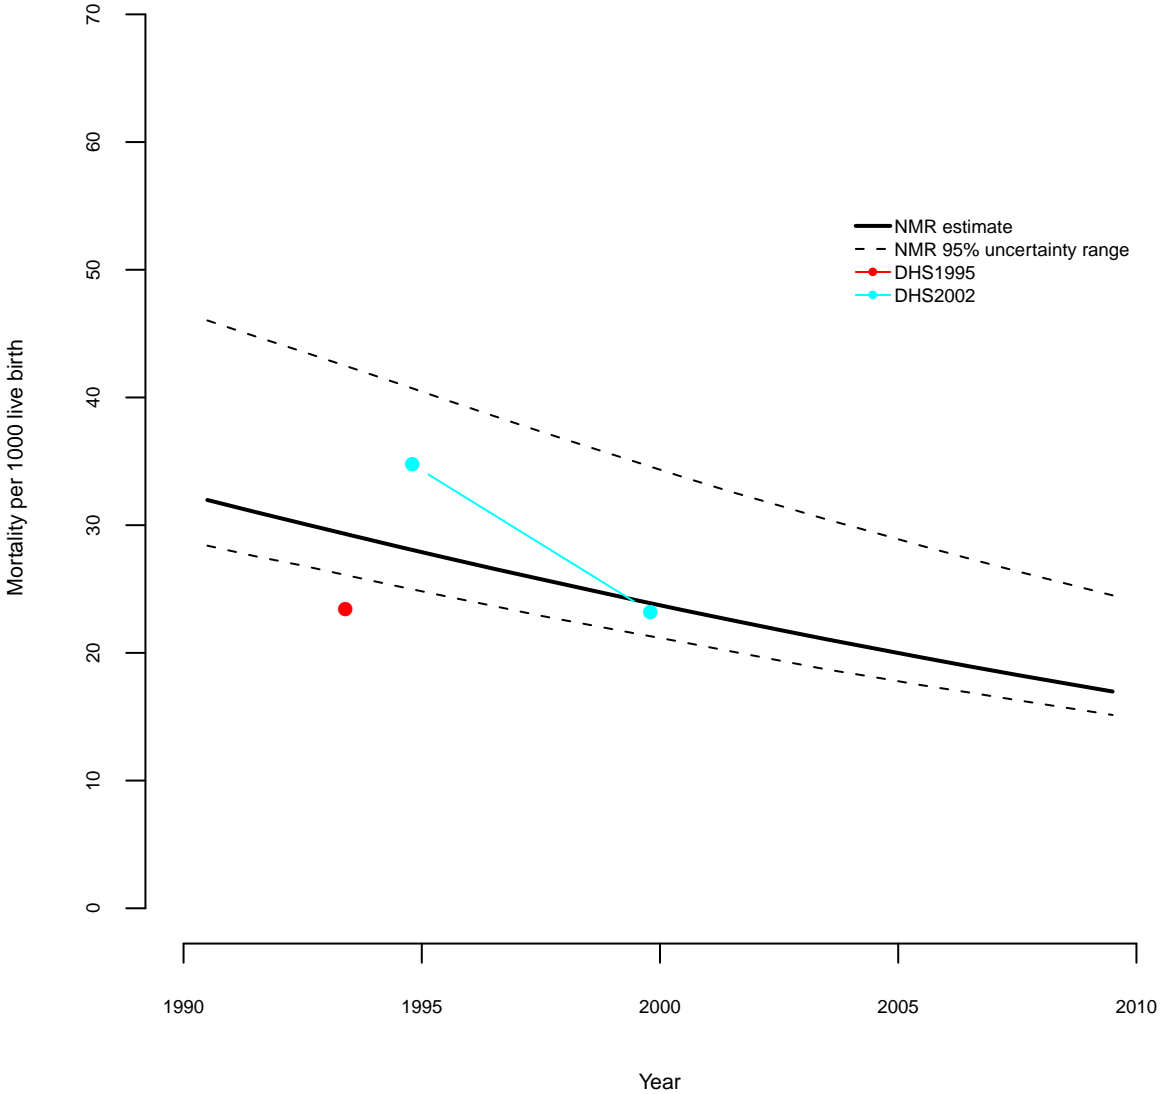

### Eritrea NMR and U5MR

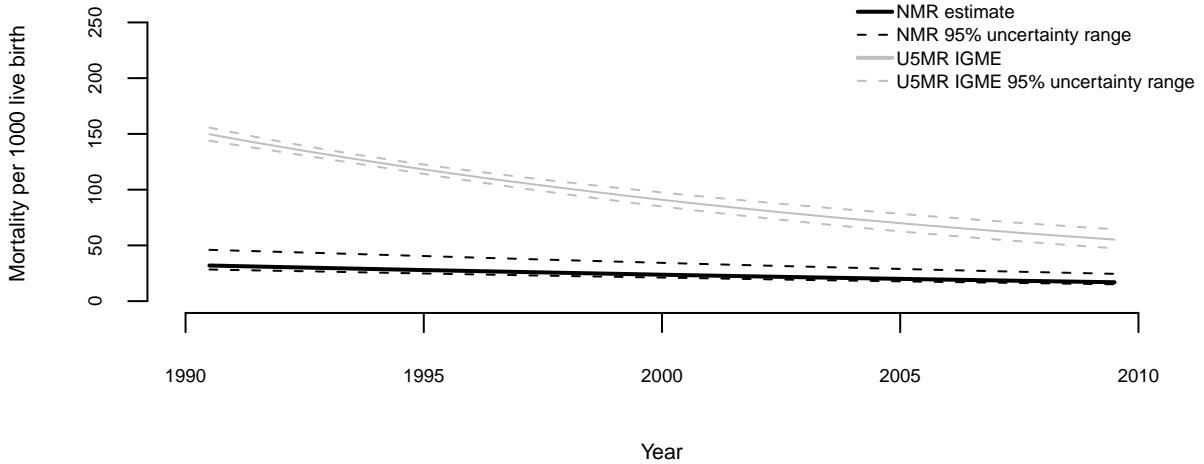

### Eritrea NMR as percentage of U5MR

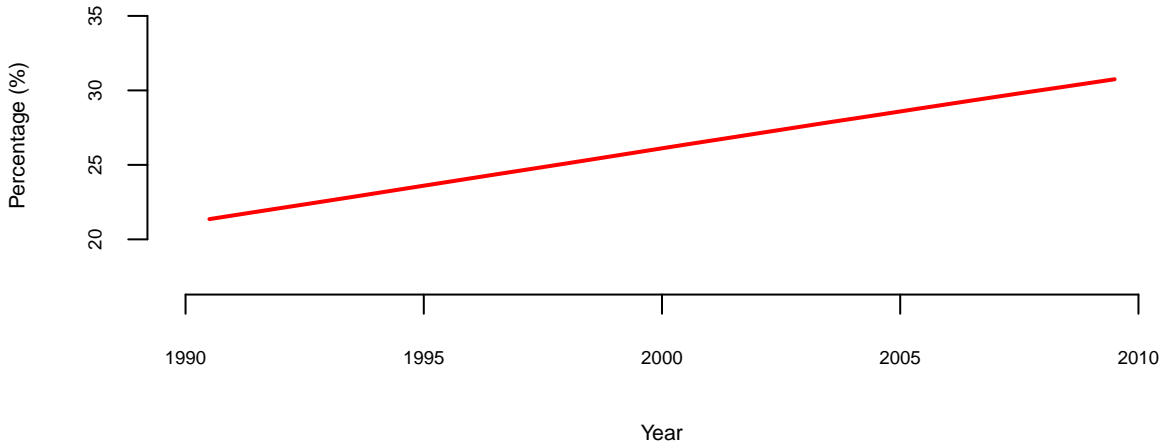

### Estonia Data, and estimated NMR

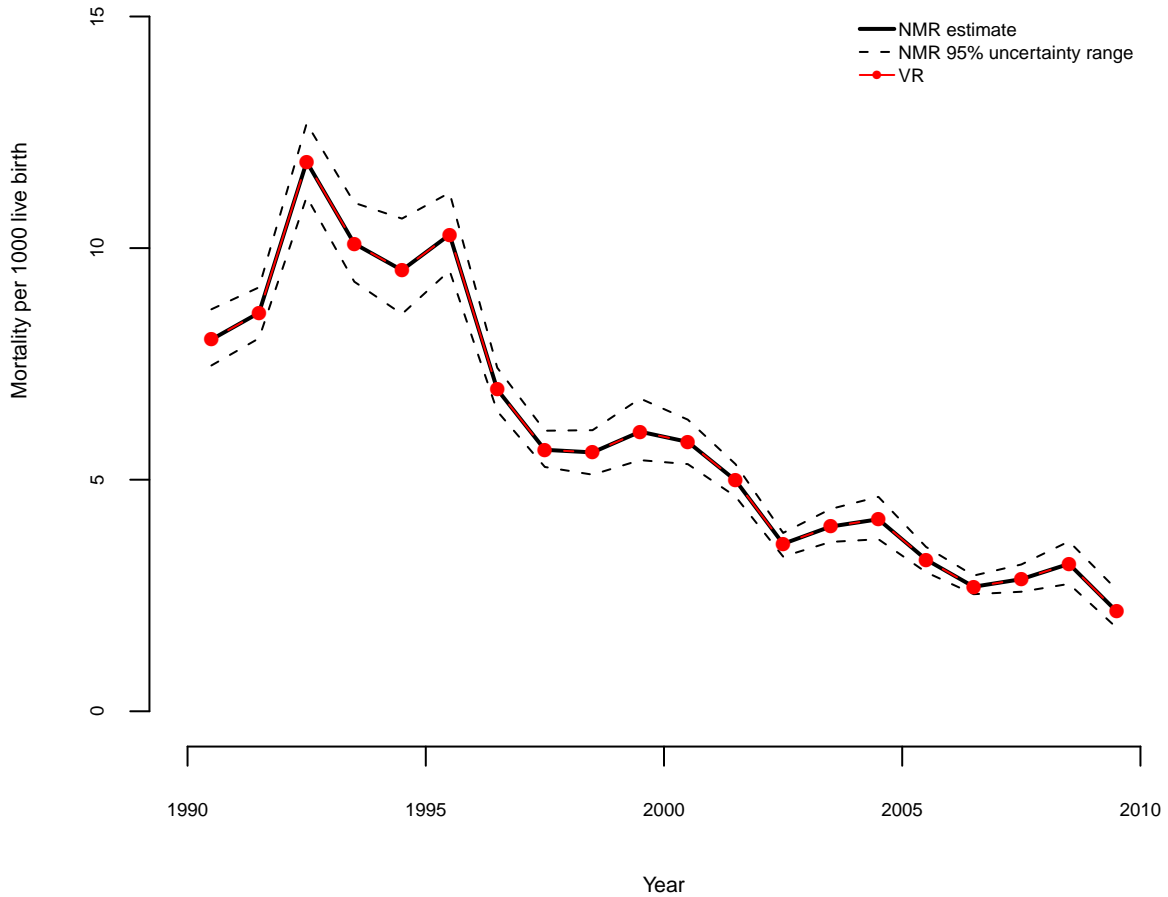

### Estonia NMR and U5MR

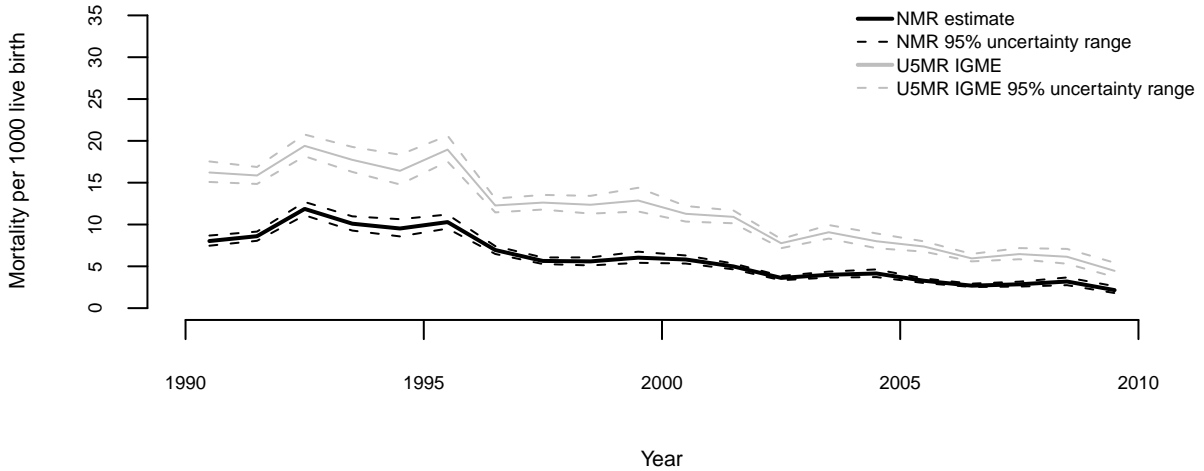

### Estonia NMR as percentage of U5MR

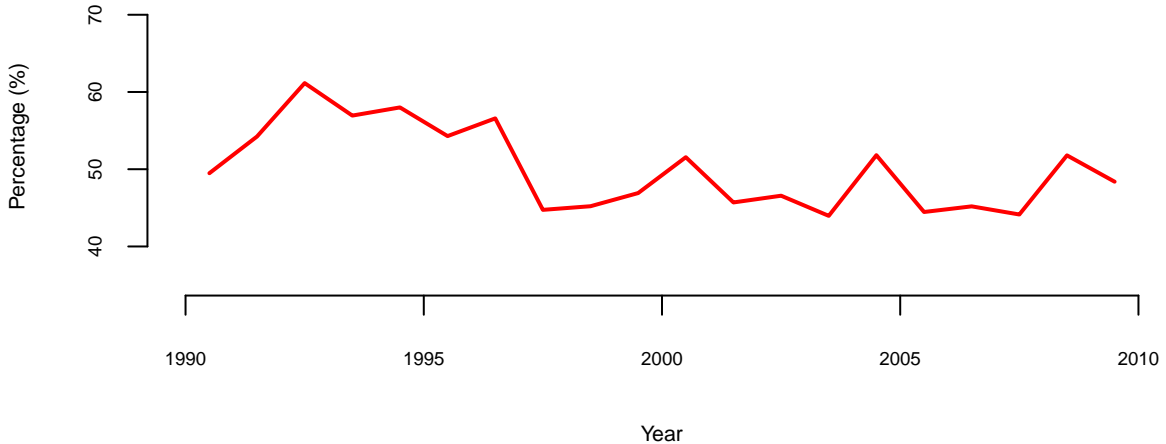

### Ethiopia Data, and estimated NMR

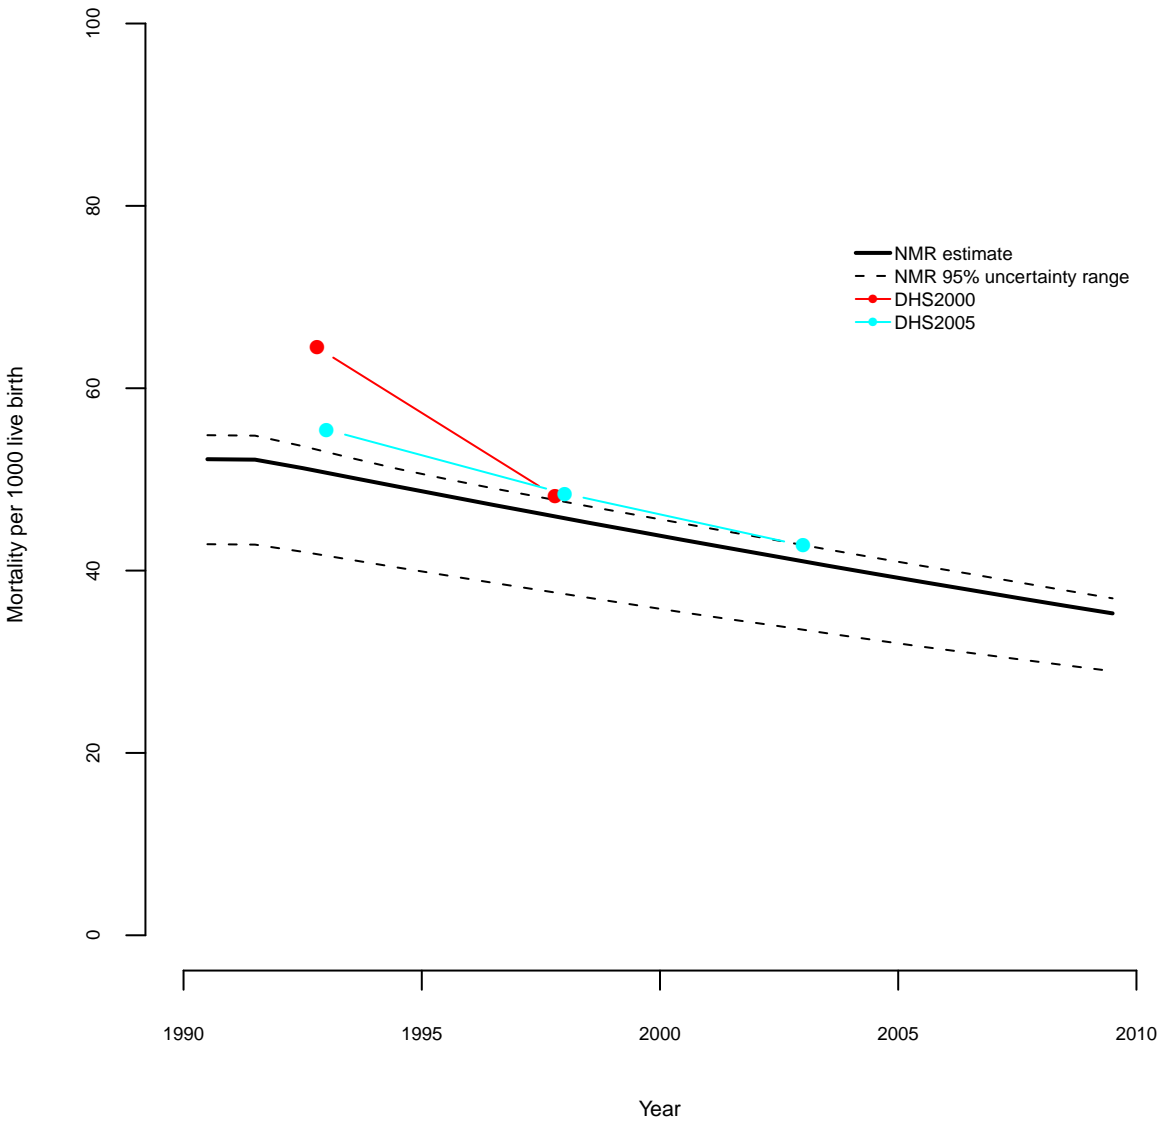

### Ethiopia NMR and U5MR

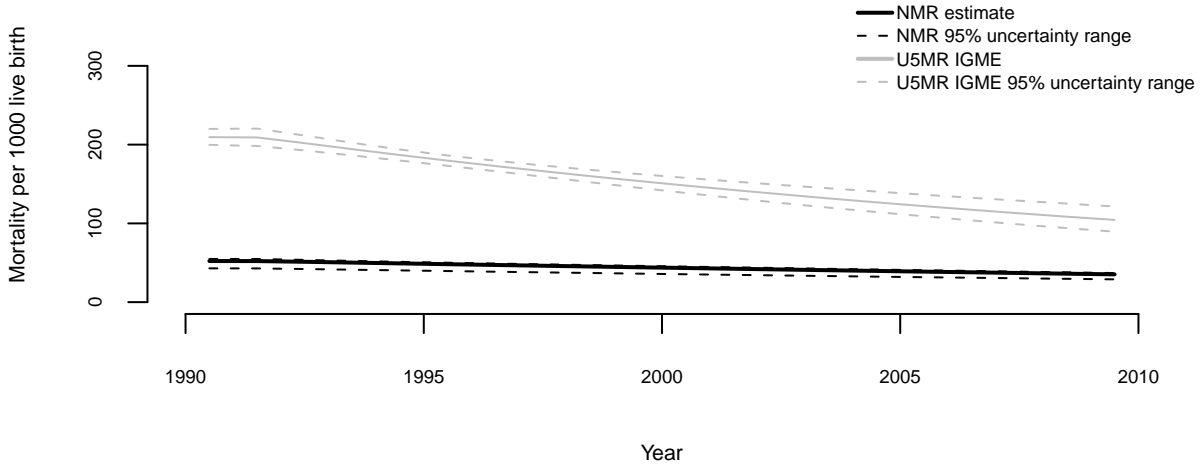

### Ethiopia NMR as percentage of U5MR

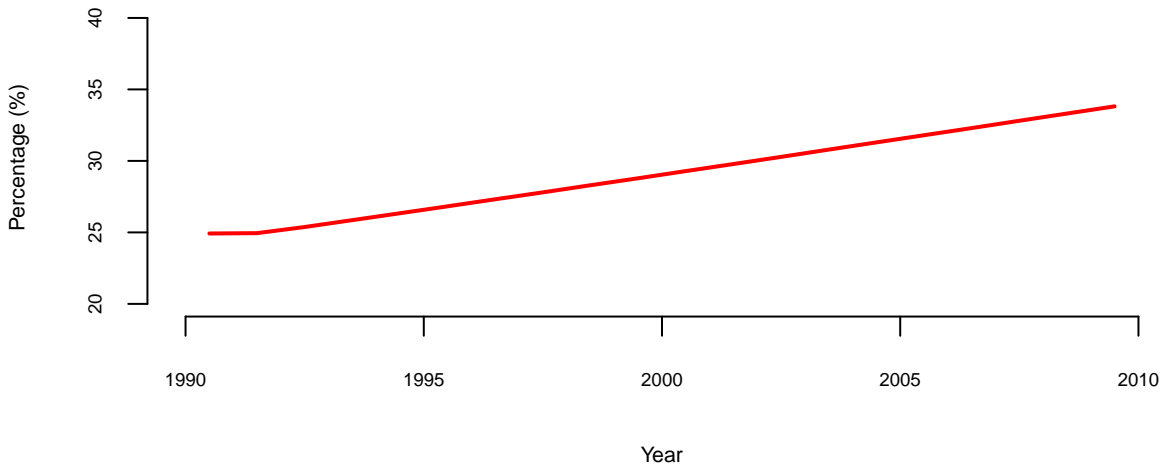

Fiji  
Data, and estimated NMR

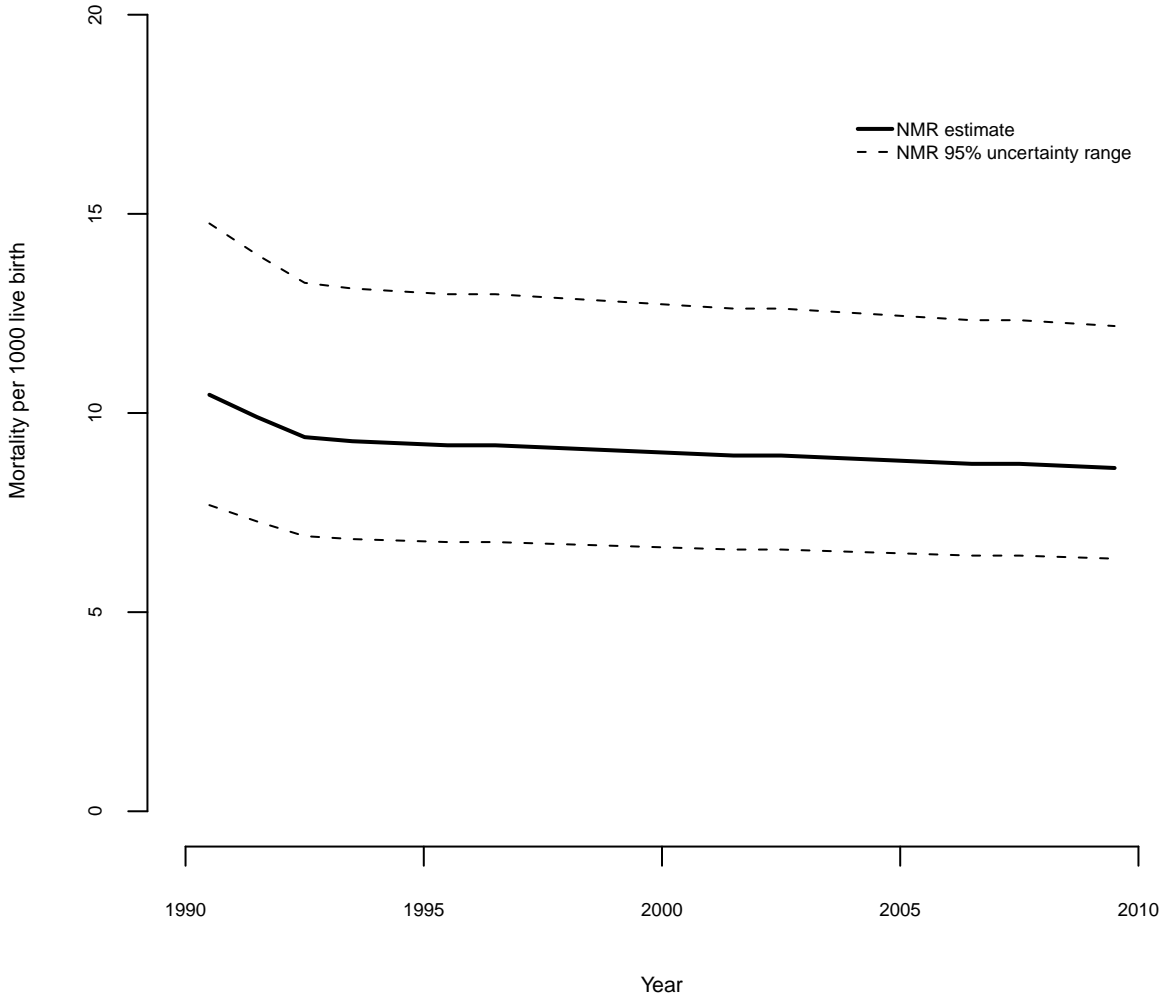

### Fiji NMR and U5MR

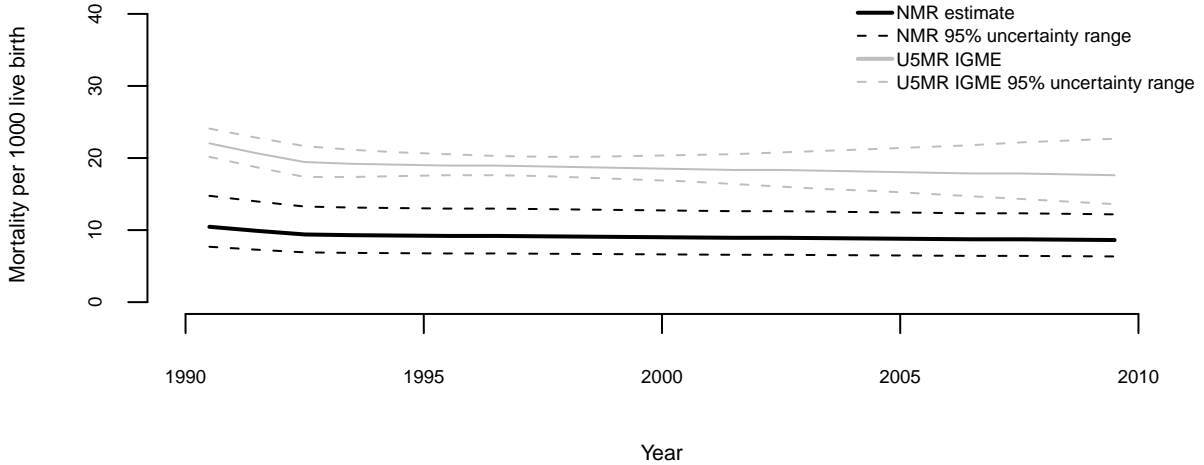

### Fiji NMR as percentage of U5MR

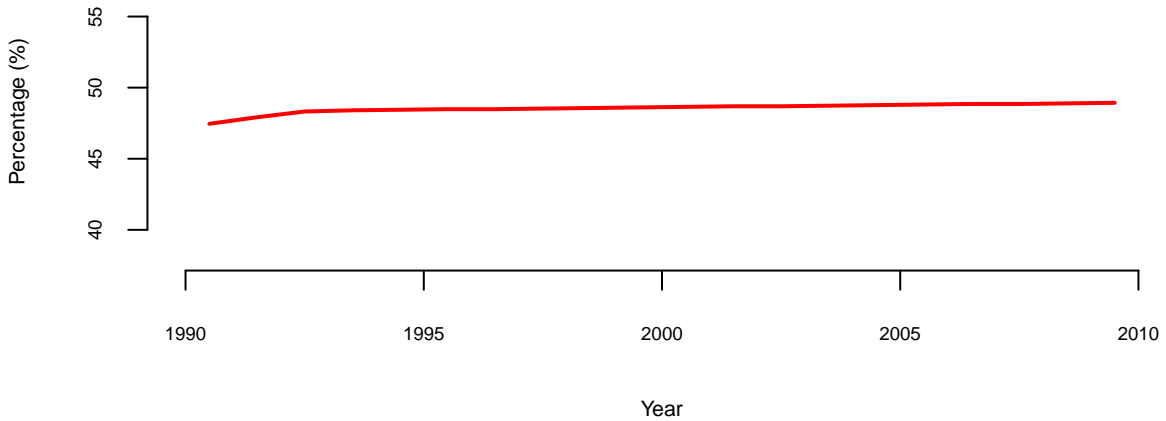



Finland  
Data, and estimated NMR

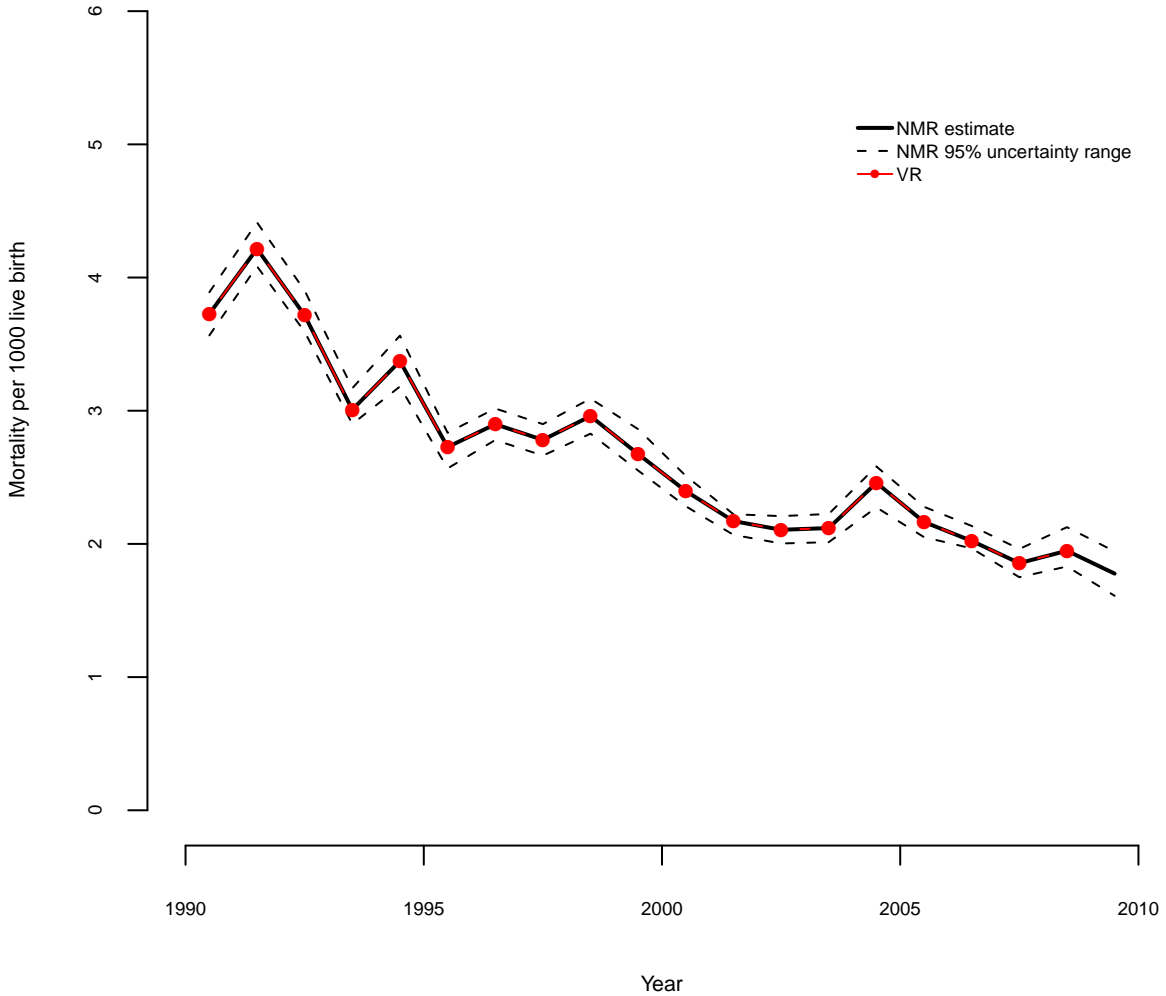

### Finland NMR and U5MR

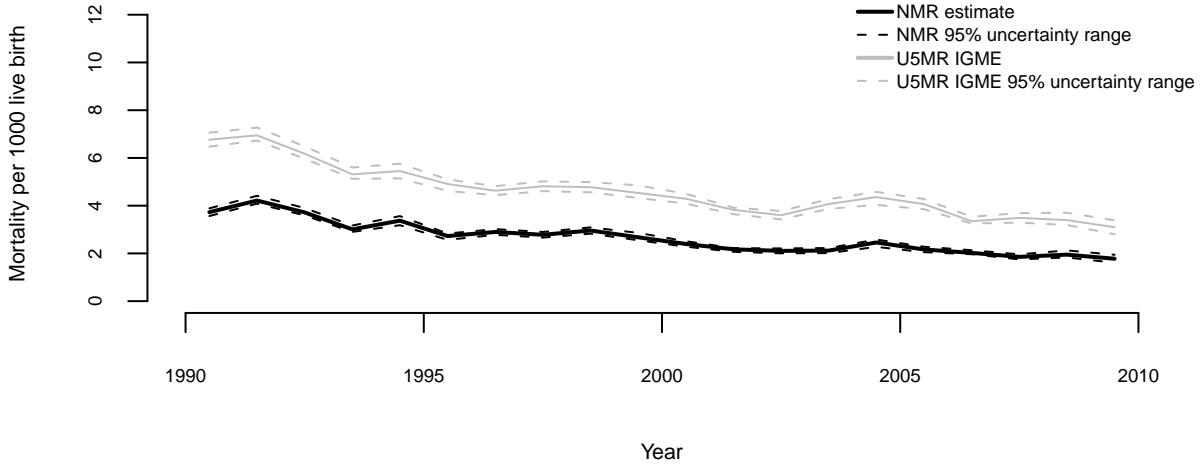

### Finland NMR as percentage of U5MR

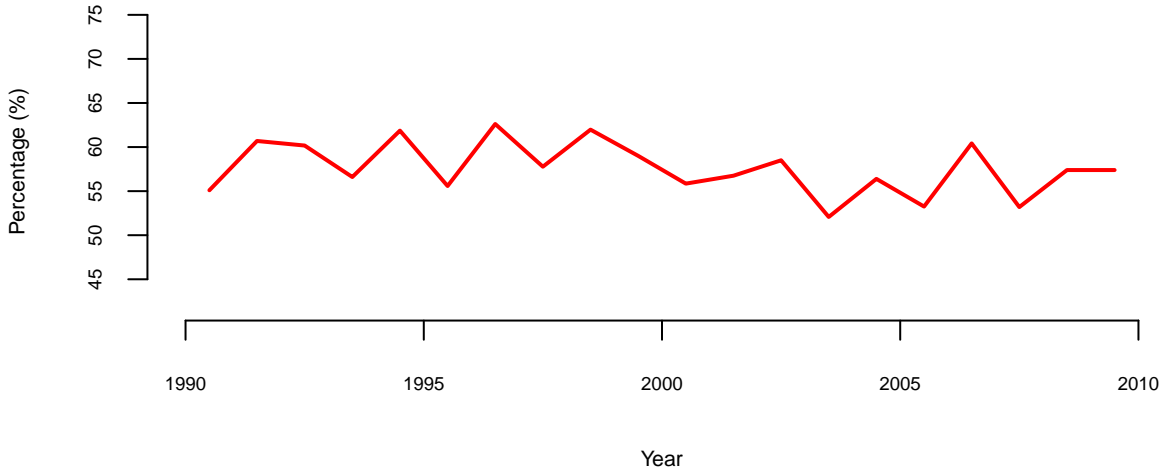

France  
Data, and estimated NMR

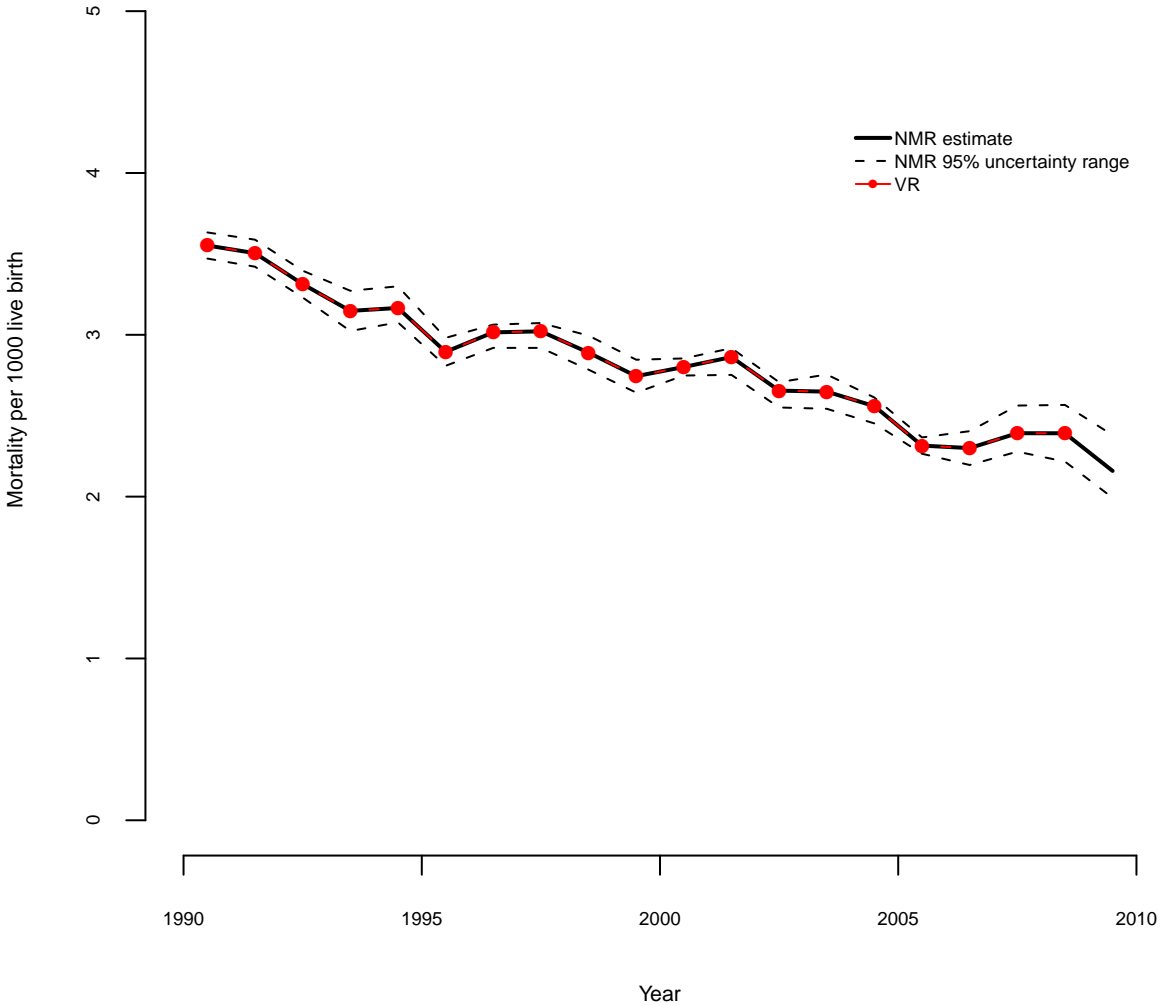

### France NMR and U5MR

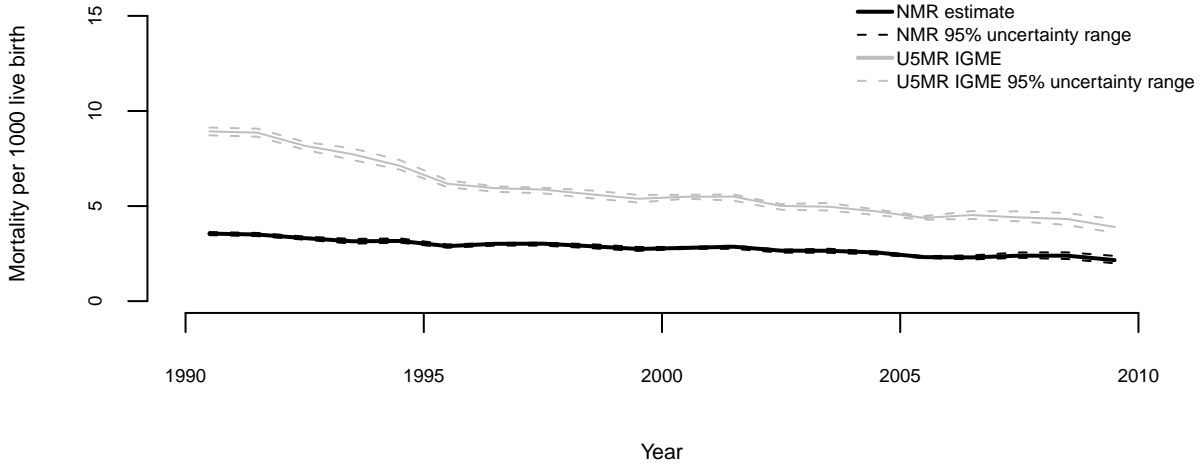

### France NMR as percentage of U5MR

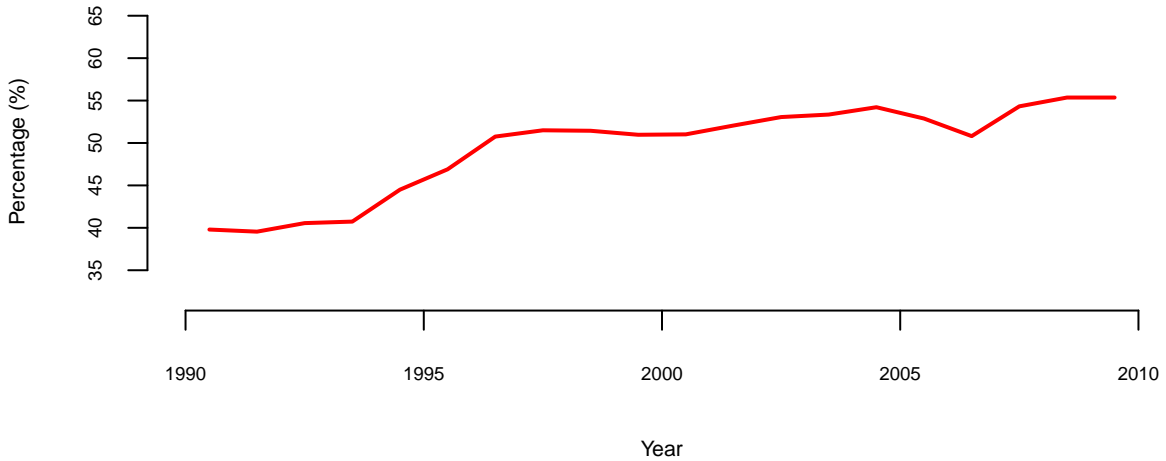

**Gabon**  
**Data, and estimated NMR**

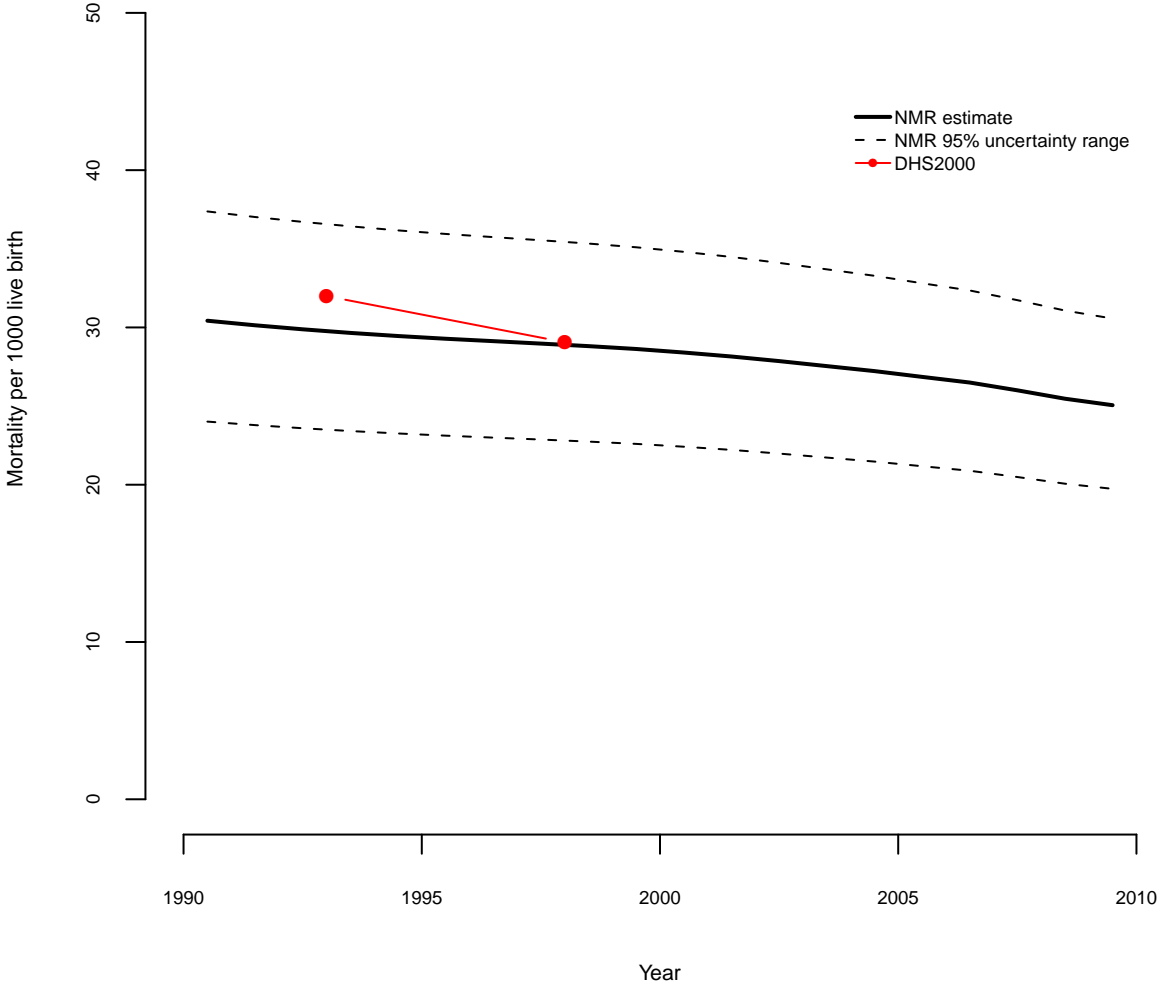

### Gabon NMR and U5MR

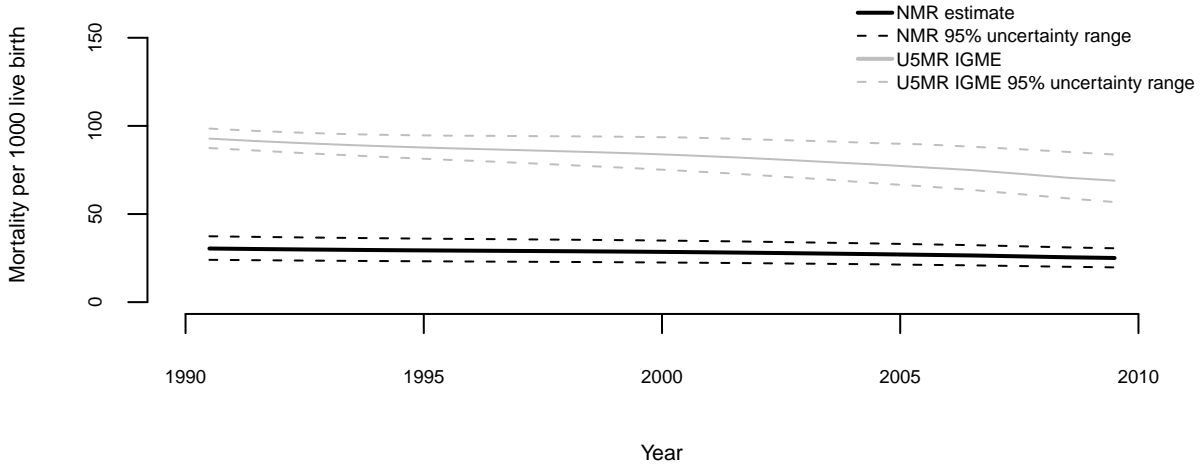

### Gabon NMR as percentage of U5MR

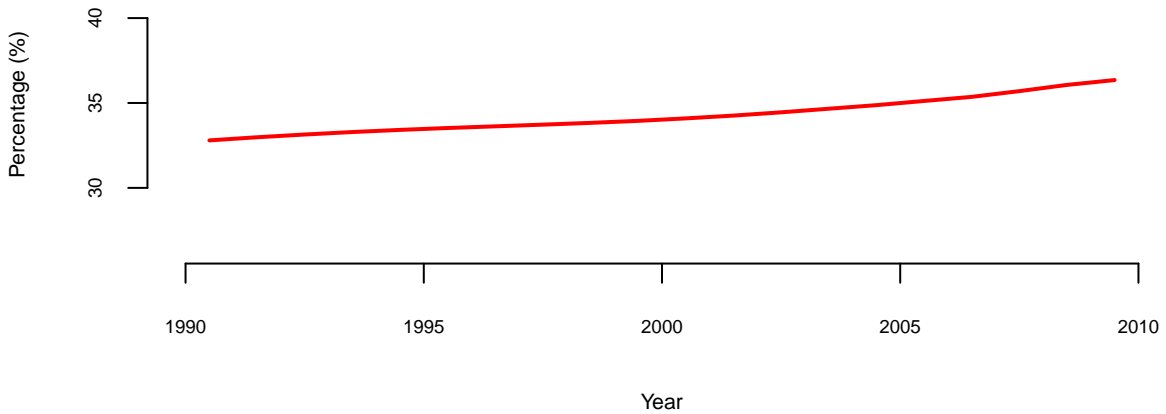

**Gambia**  
**Data, and estimated NMR**

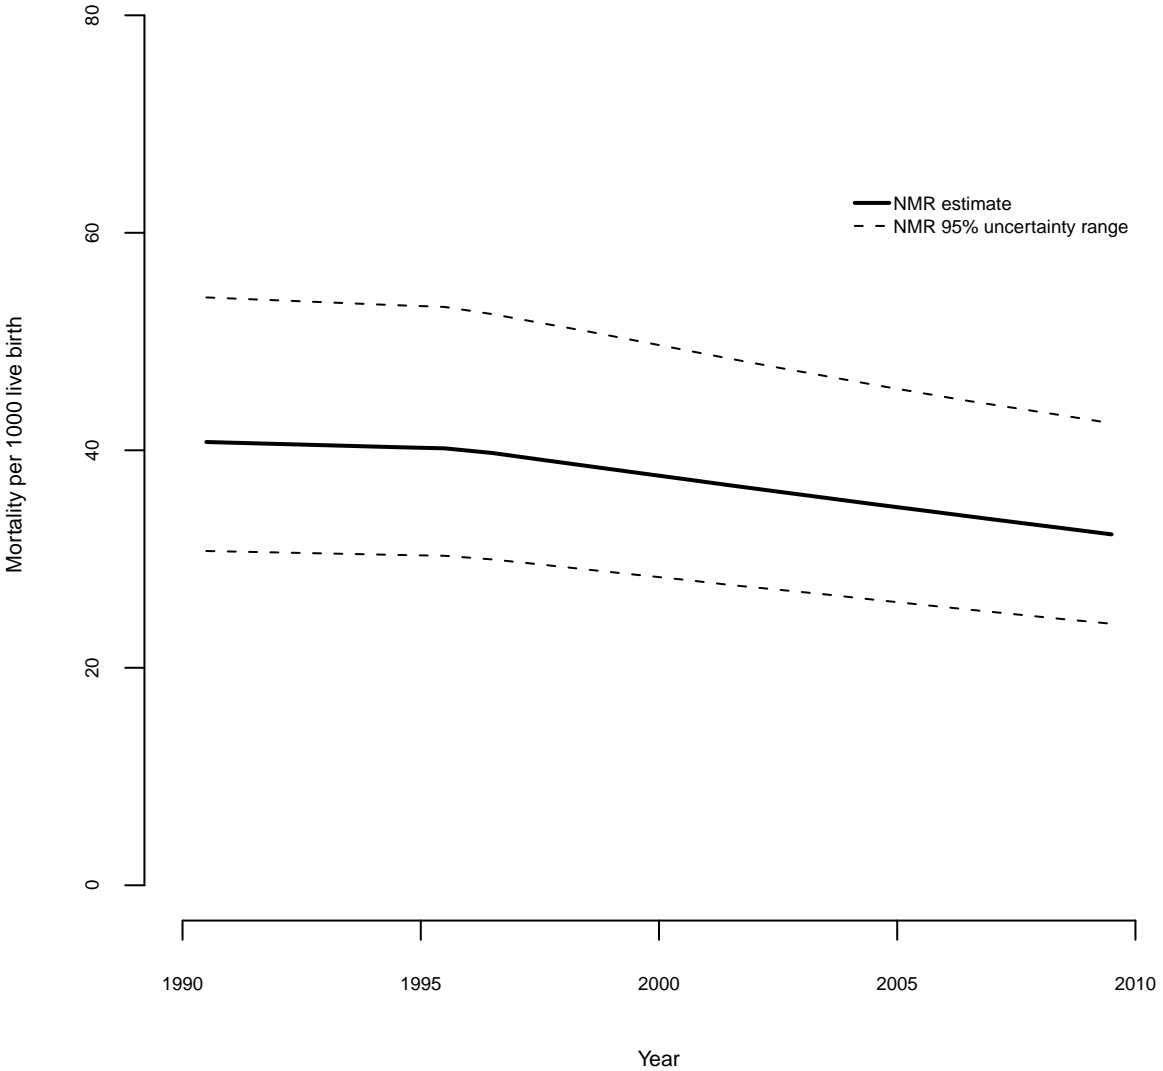

### Gambia NMR and U5MR

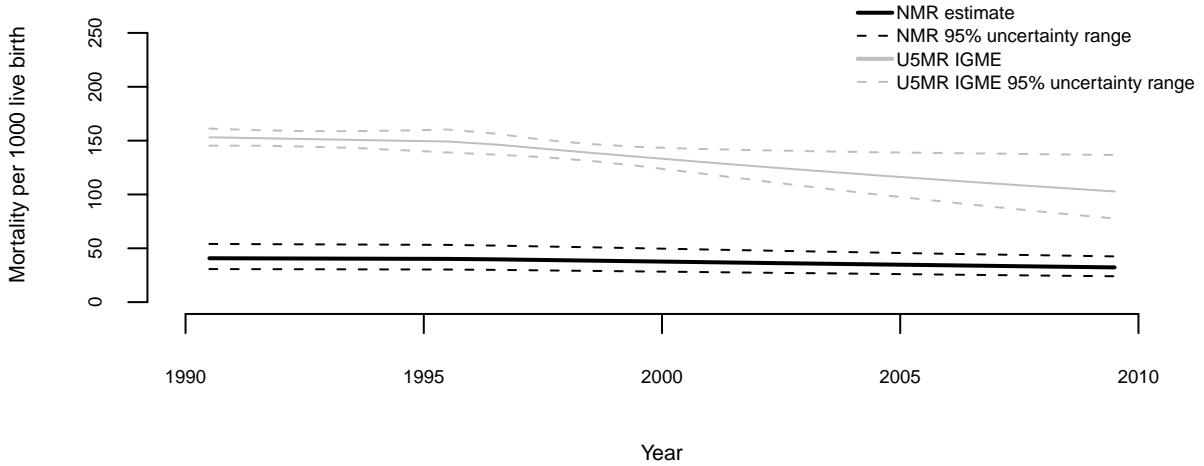

### Gambia NMR as percentage of U5MR

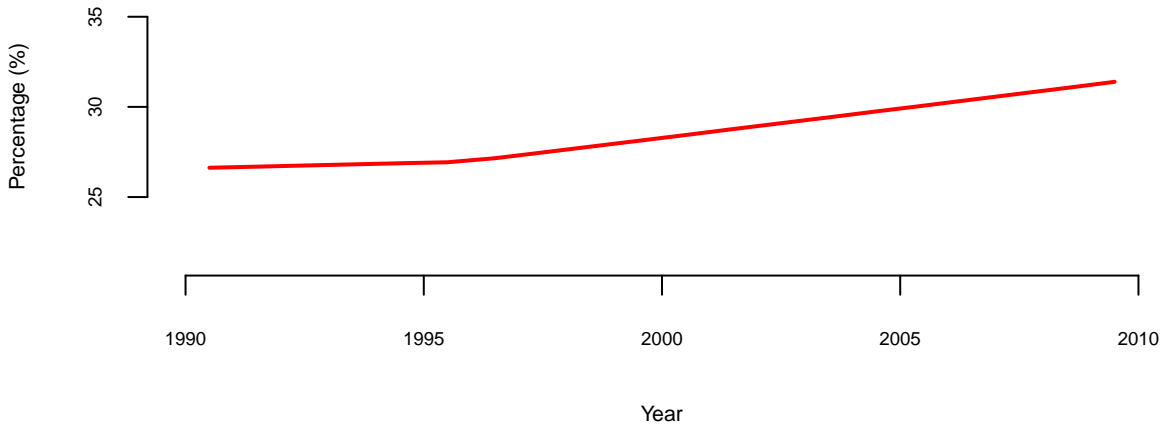



# Georgia

## Data, and estimated NMR

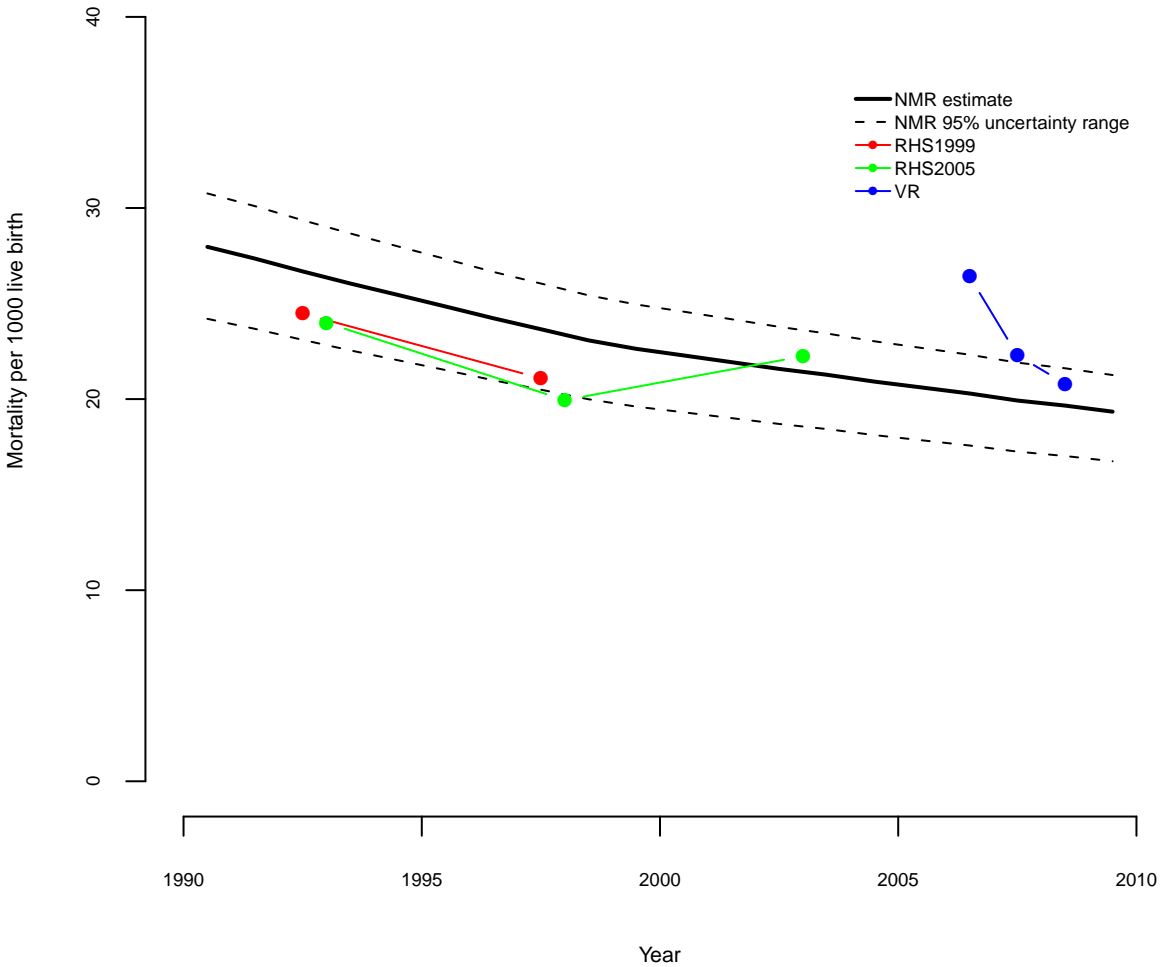

### Georgia NMR and U5MR

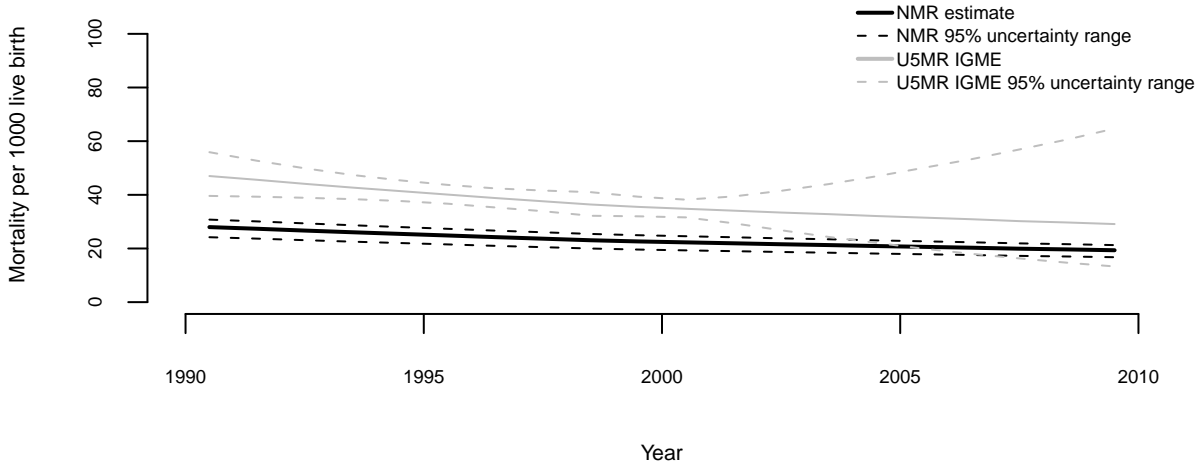

### Georgia NMR as percentage of U5MR

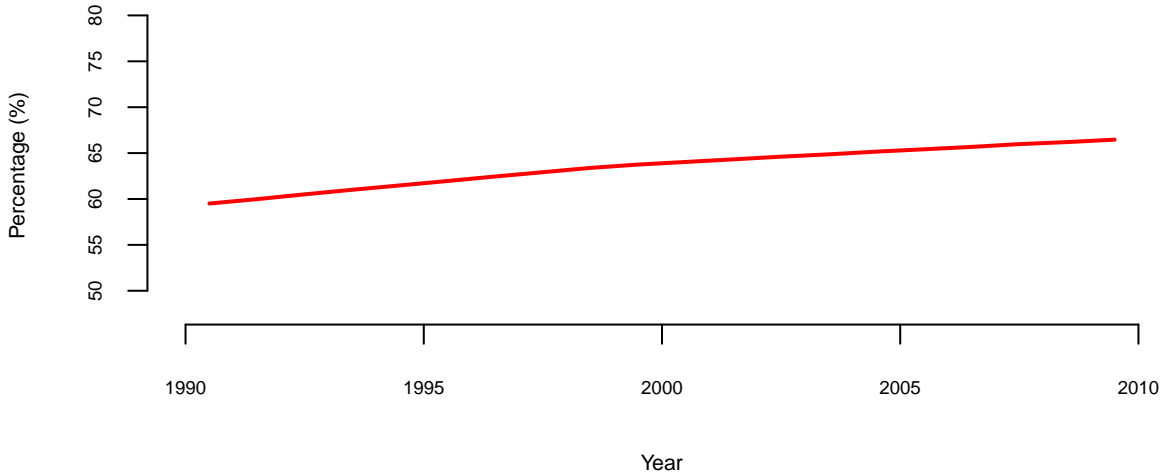

Germany  
Data, and estimated NMR

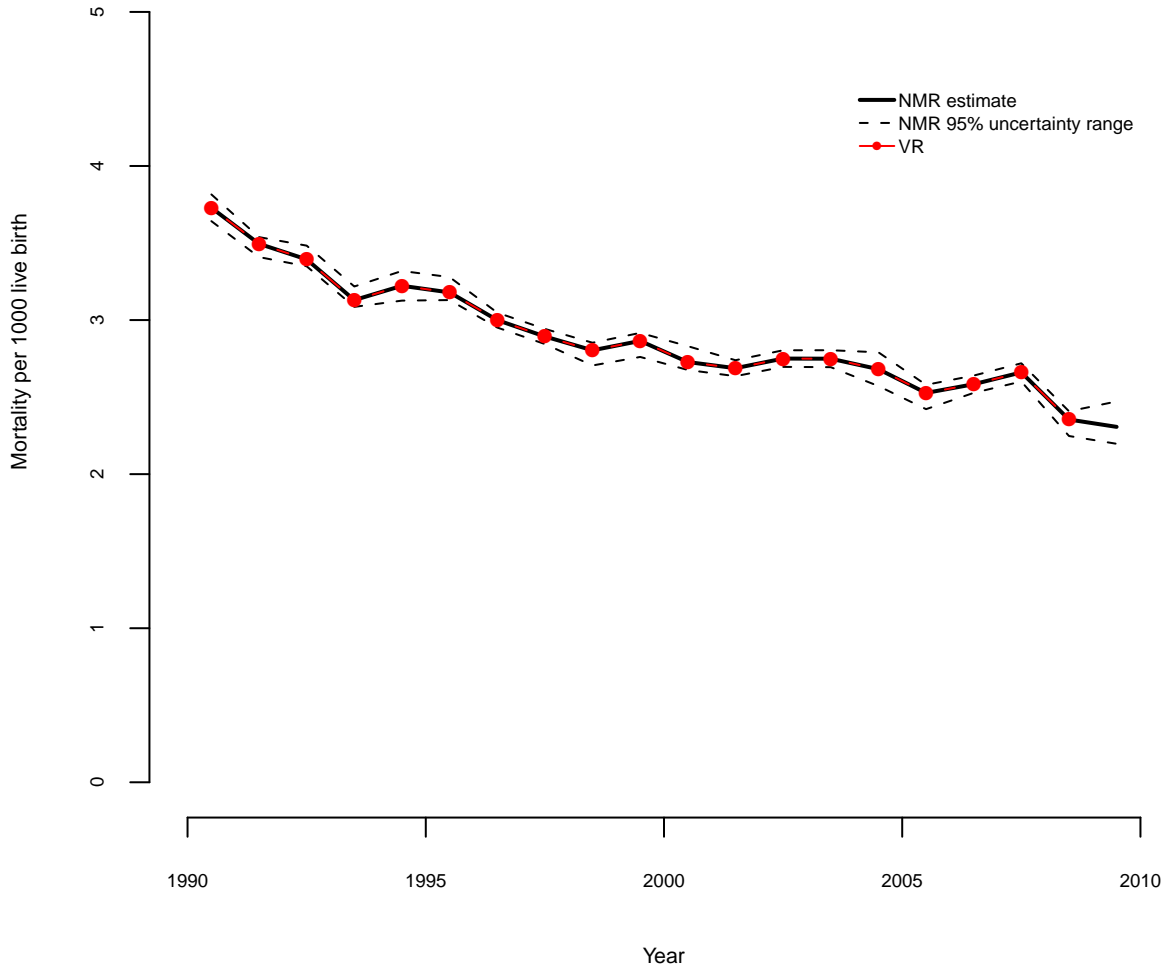

### Germany NMR and U5MR

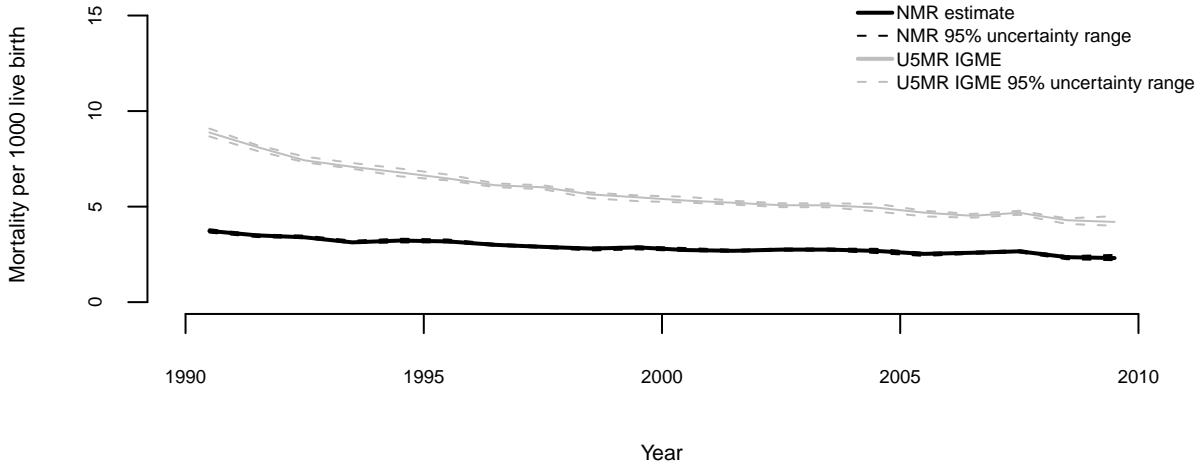

### Germany NMR as percentage of U5MR

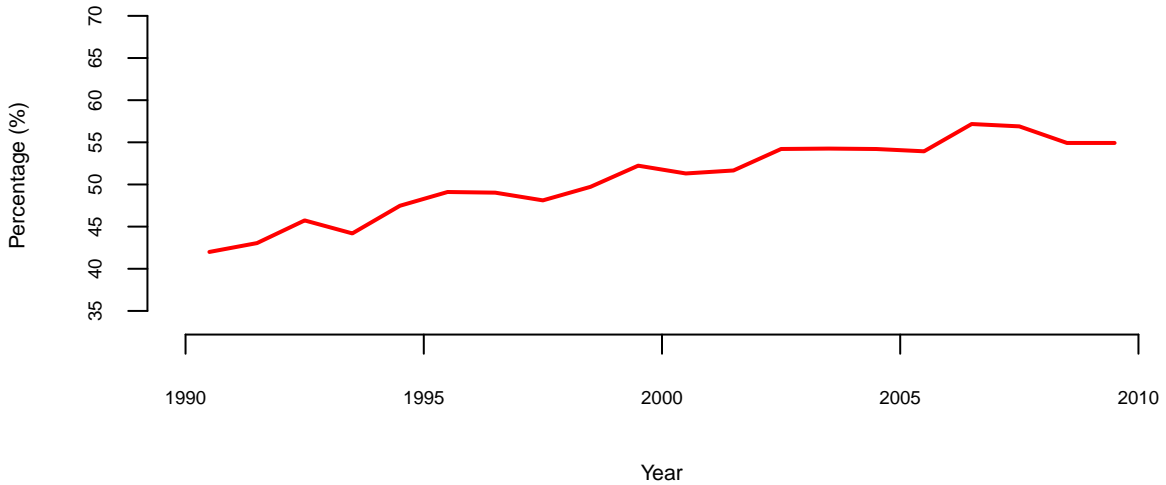

# Ghana

## Data, and estimated NMR

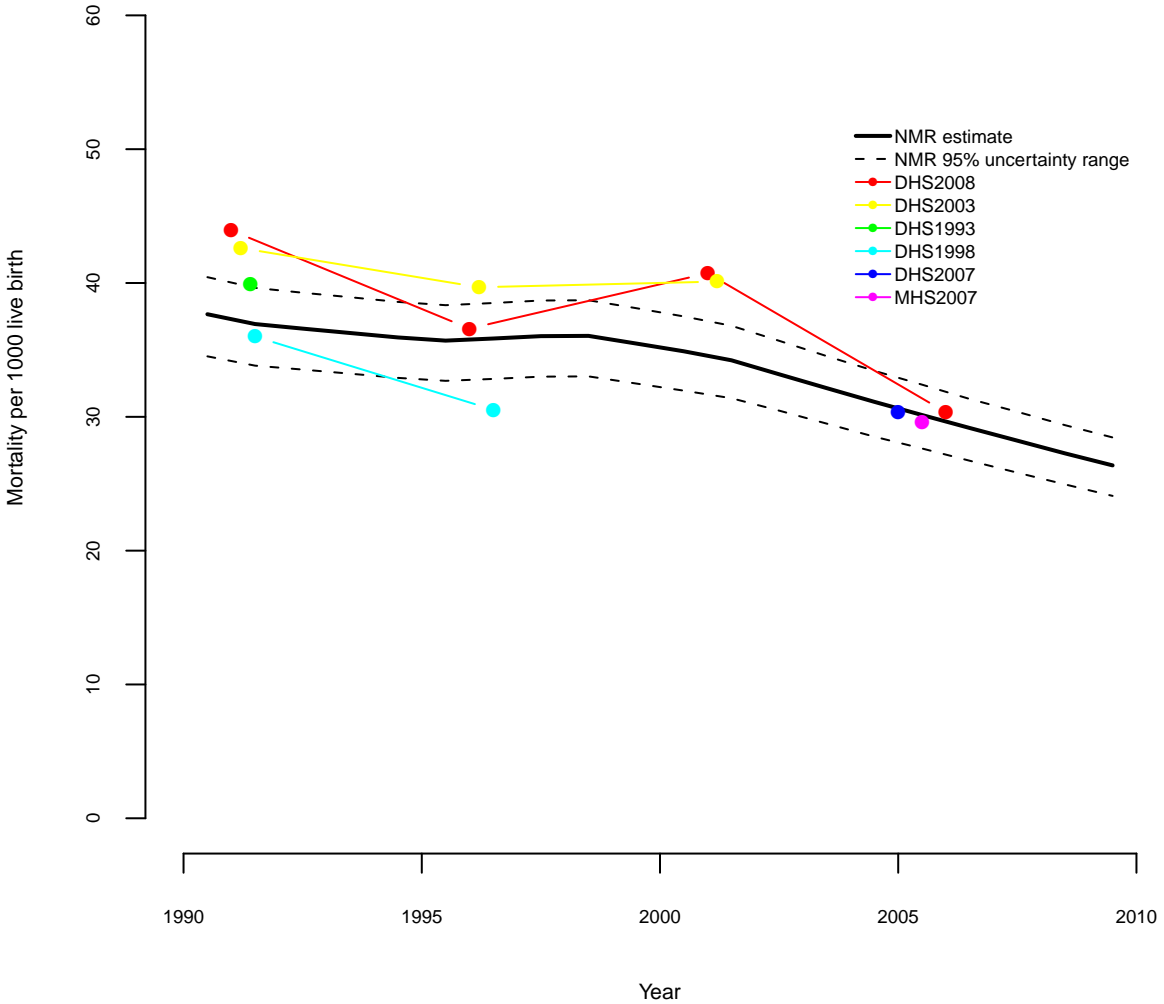

### Ghana NMR and U5MR

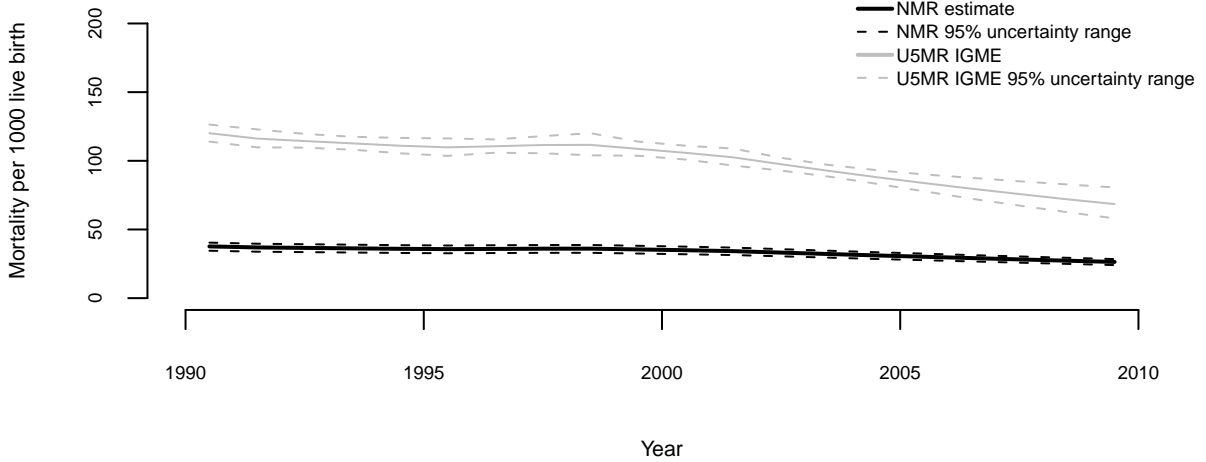

### Ghana NMR as percentage of U5MR

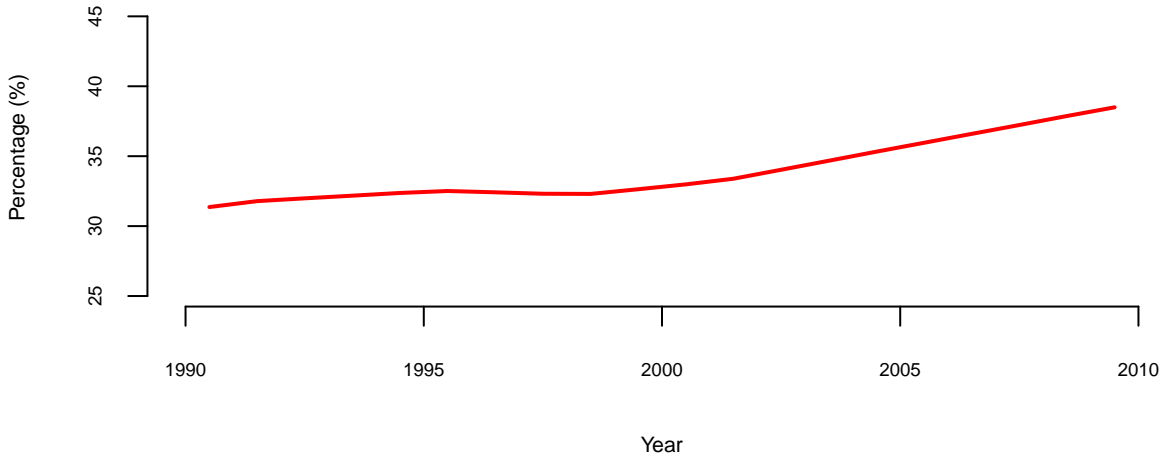

Greece  
Data, and estimated NMR

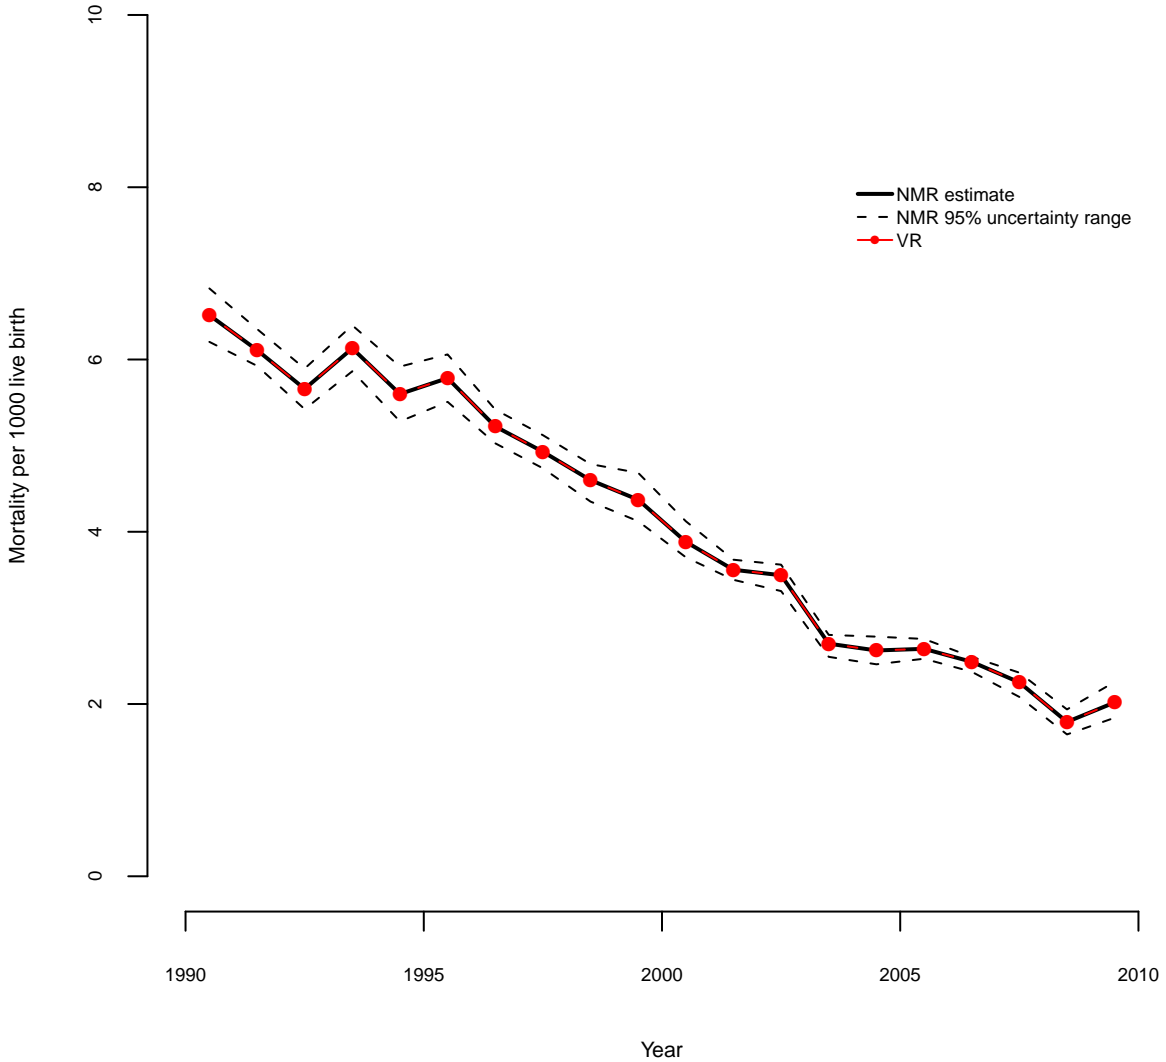

### Greece NMR and U5MR

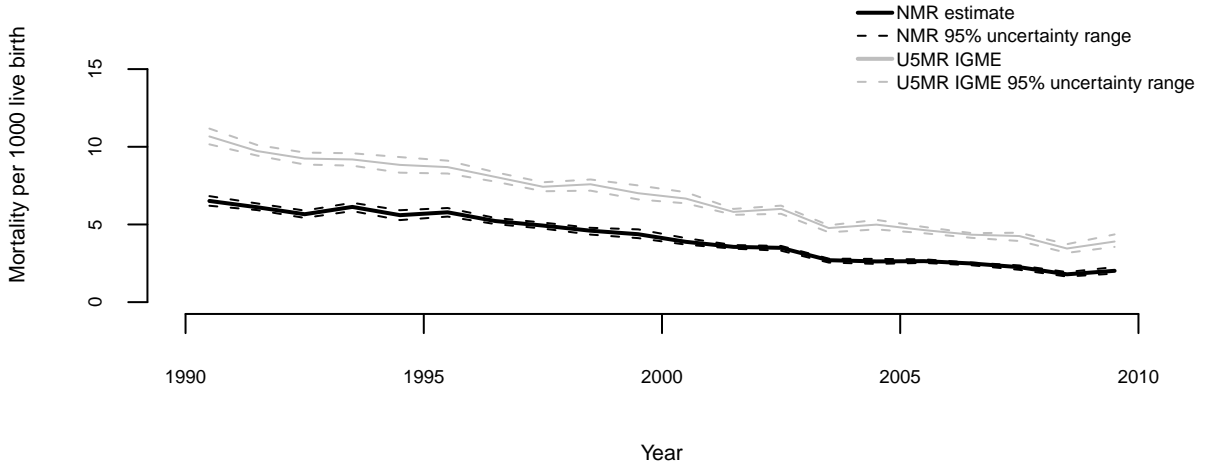

### Greece NMR as percentage of U5MR

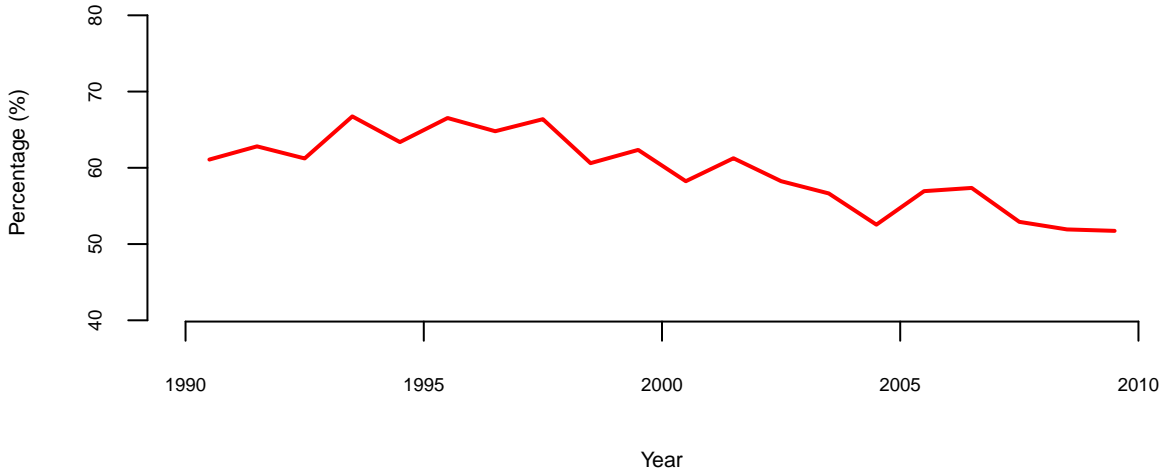



### Grenada Data, and estimated NMR

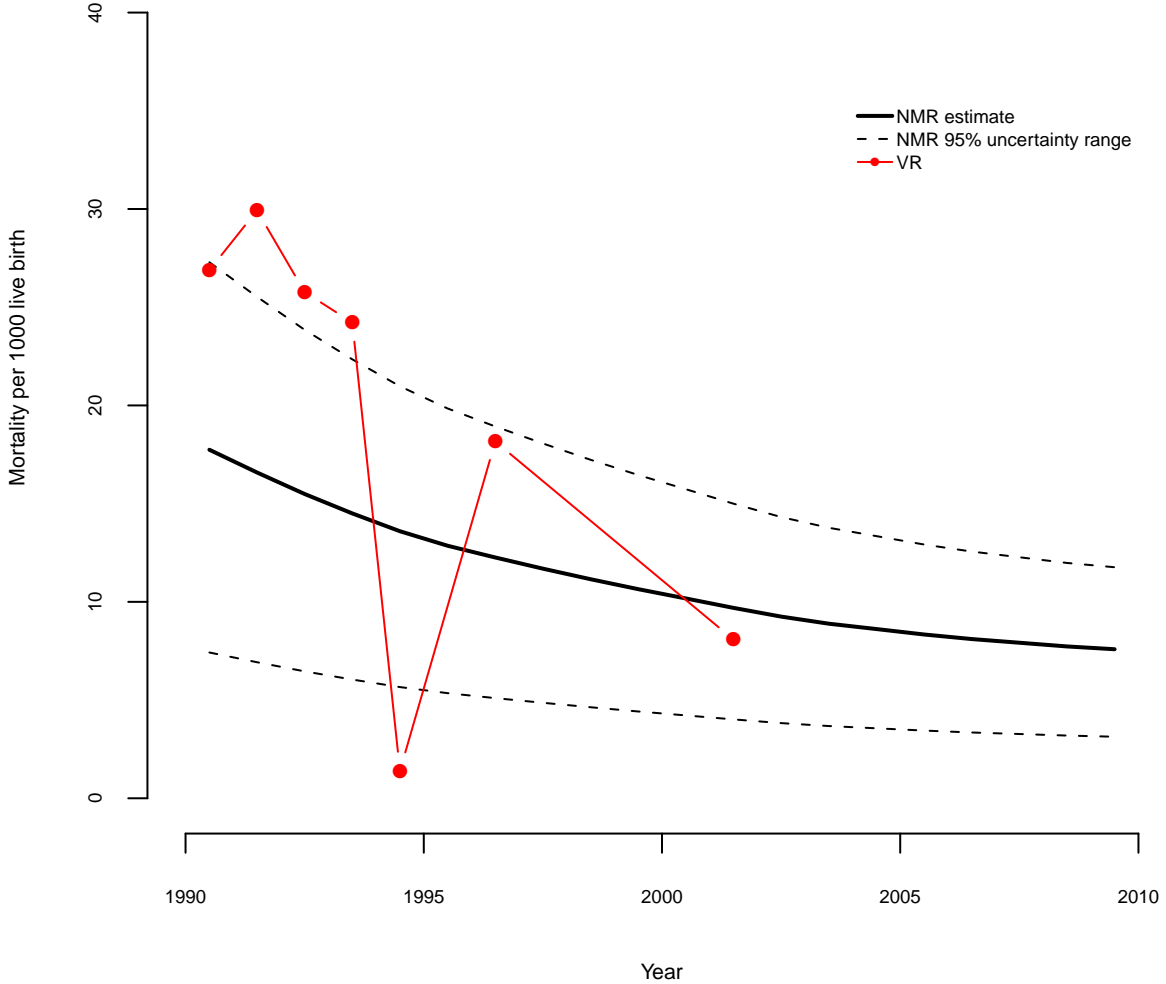

### Grenada NMR and U5MR

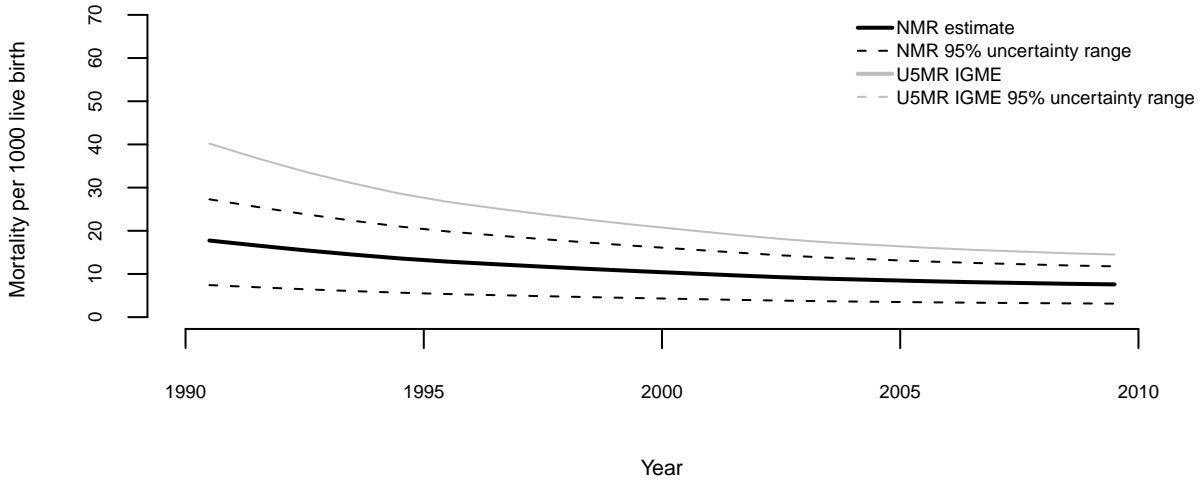

### Grenada NMR as percentage of U5MR

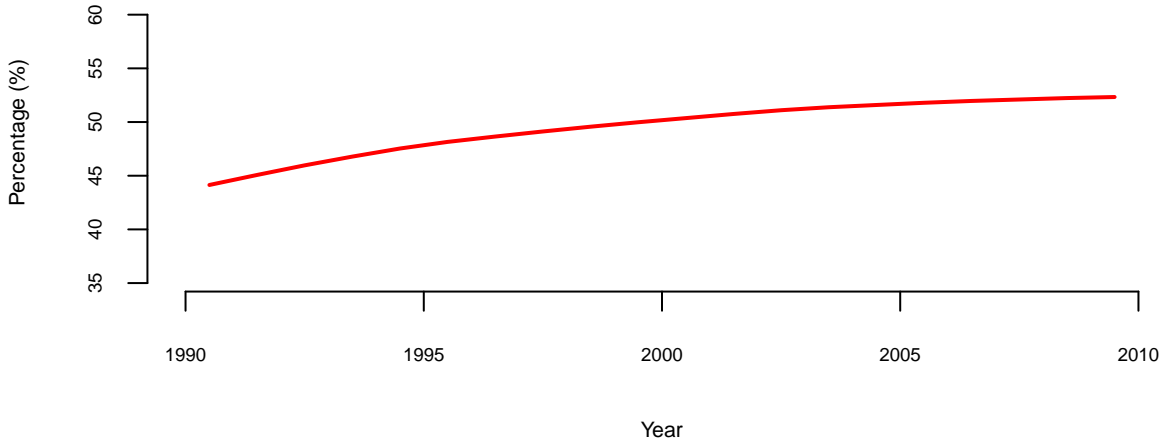

# Guatemala

## Data, and estimated NMR

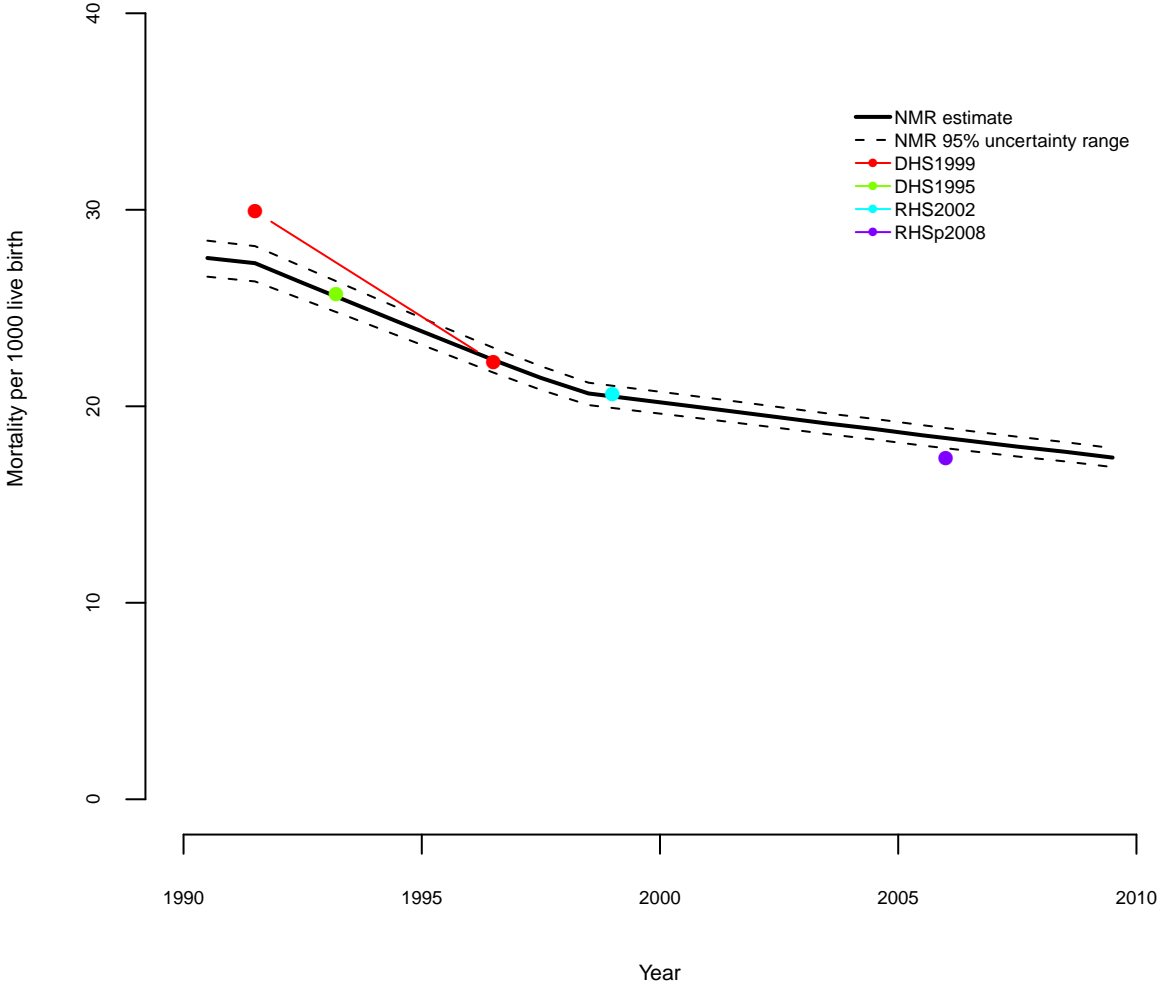

### Guatemala NMR and U5MR

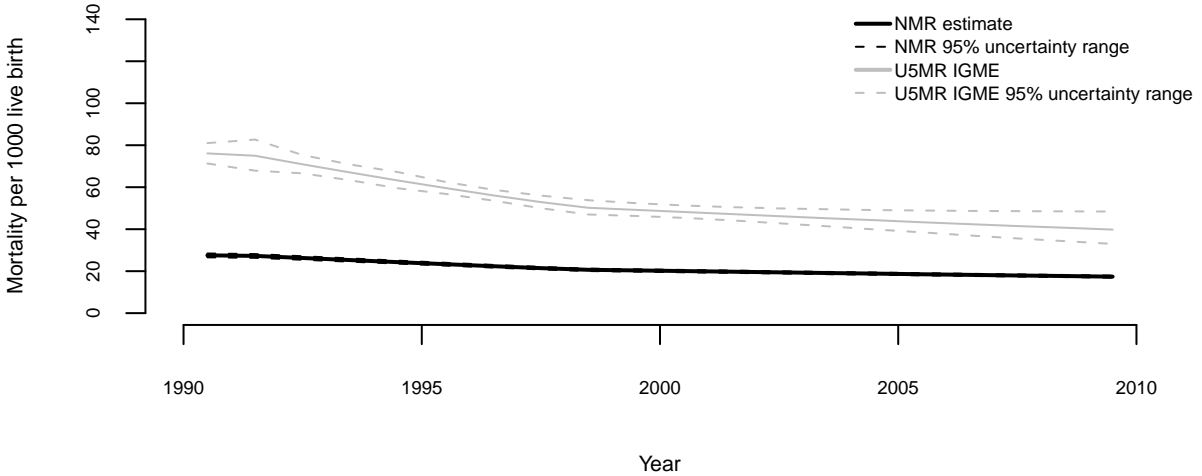

### Guatemala NMR as percentage of U5MR

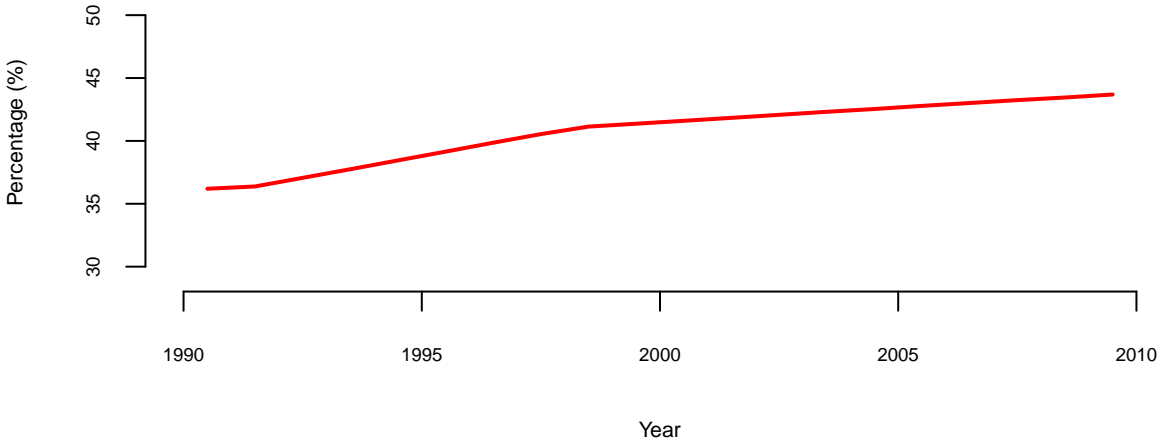

# Guinea

## Data, and estimated NMR

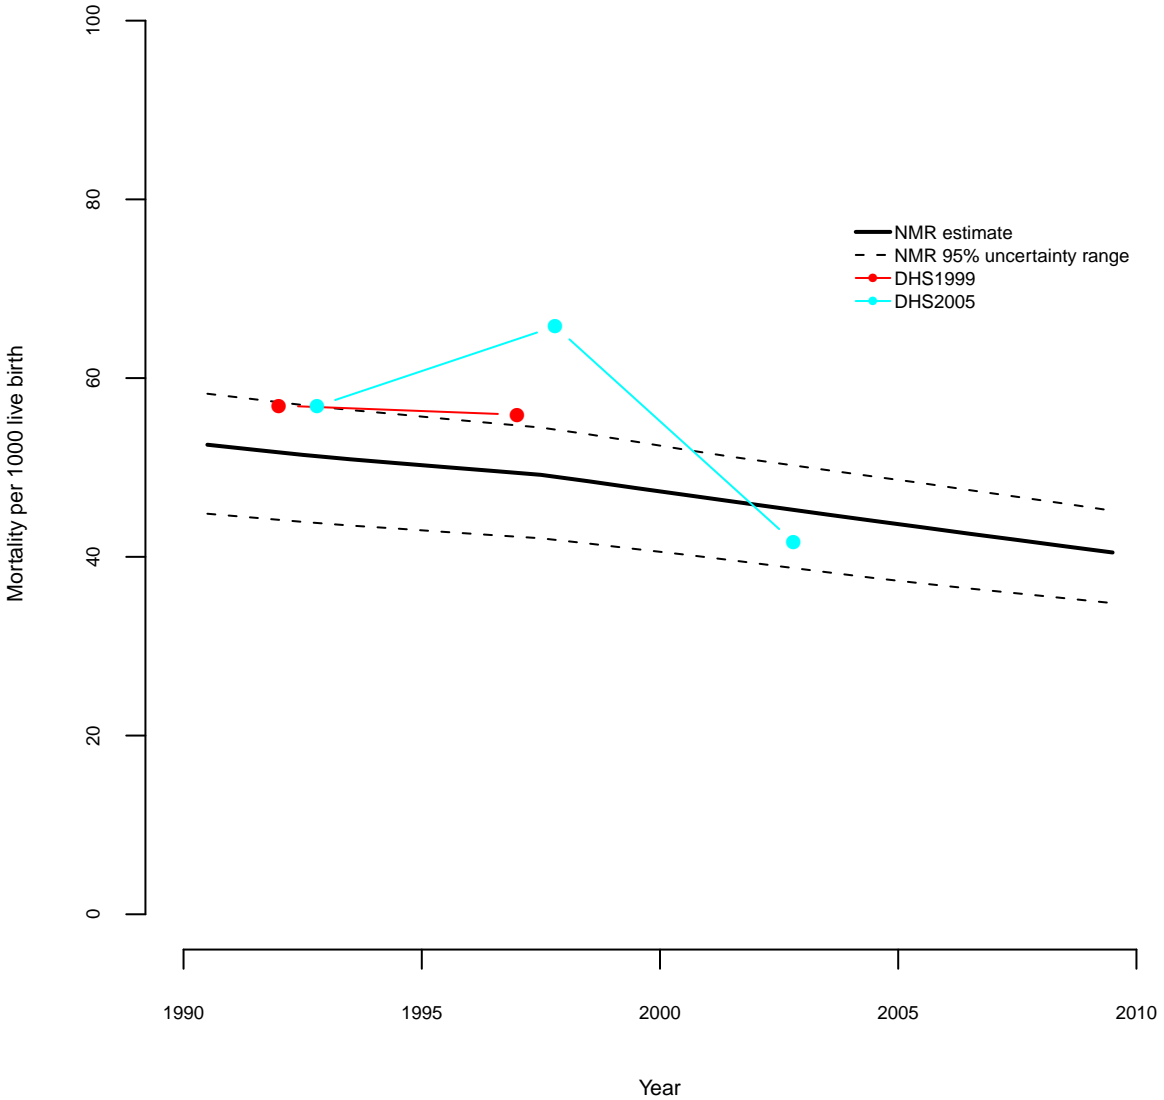

### Guinea NMR and U5MR

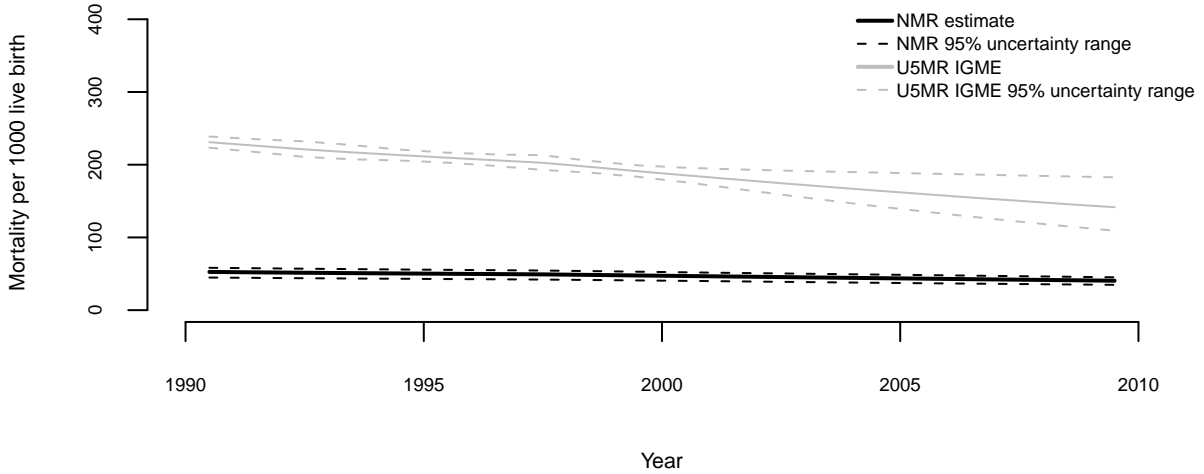

### Guinea NMR as percentage of U5MR

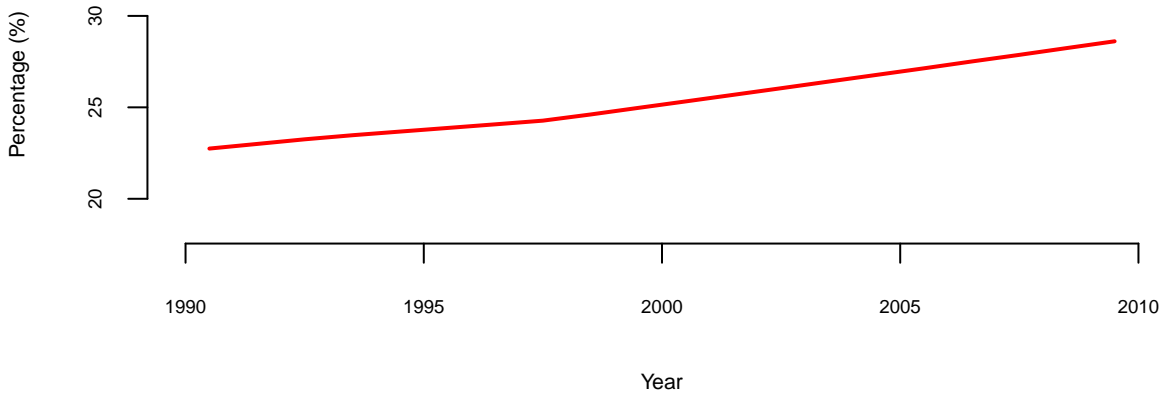

**Guinea-Bissau**  
**Data, and estimated NMR**

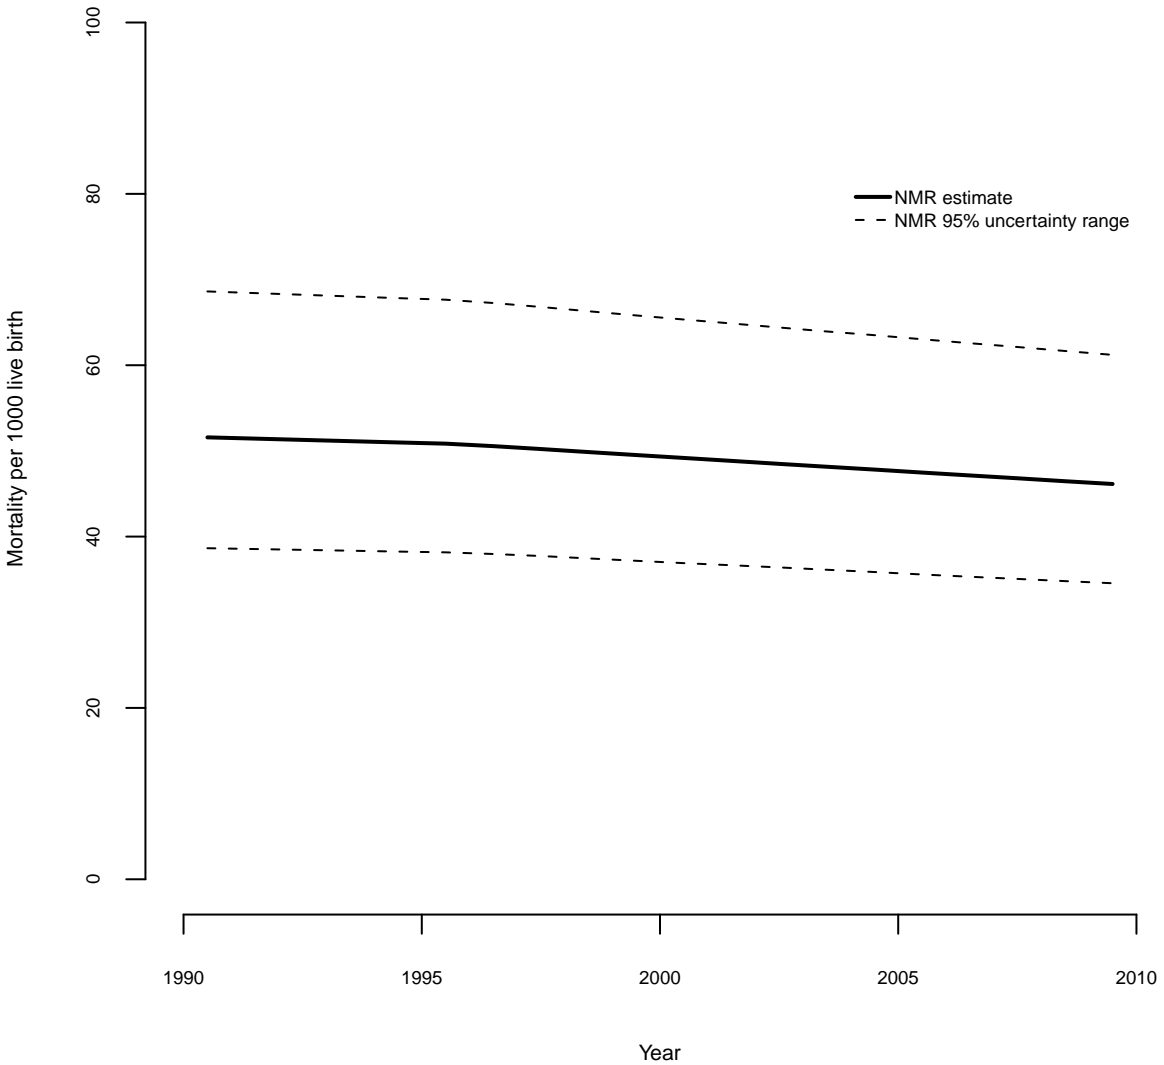

### Guinea-Bissau NMR and U5MR

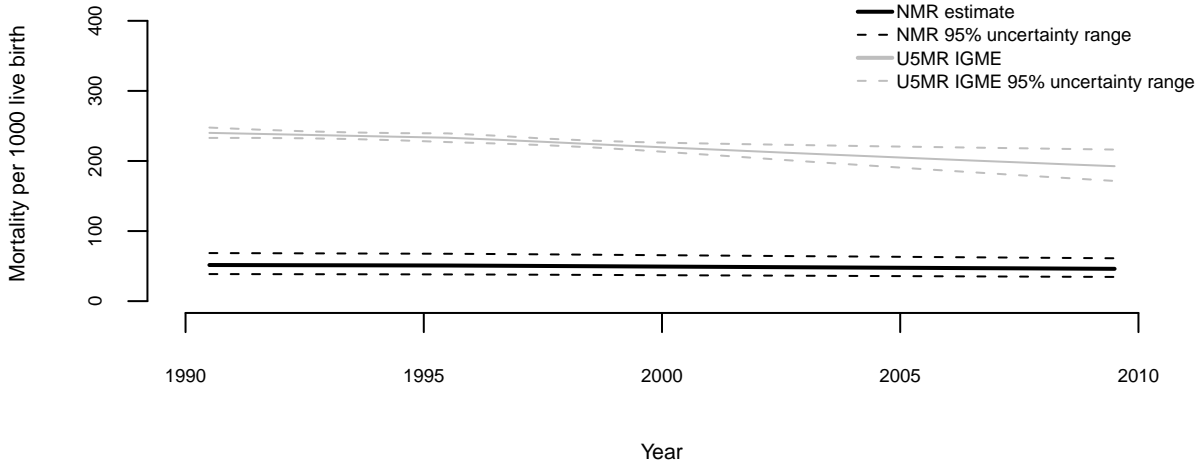

### Guinea-Bissau NMR as percentage of U5MR

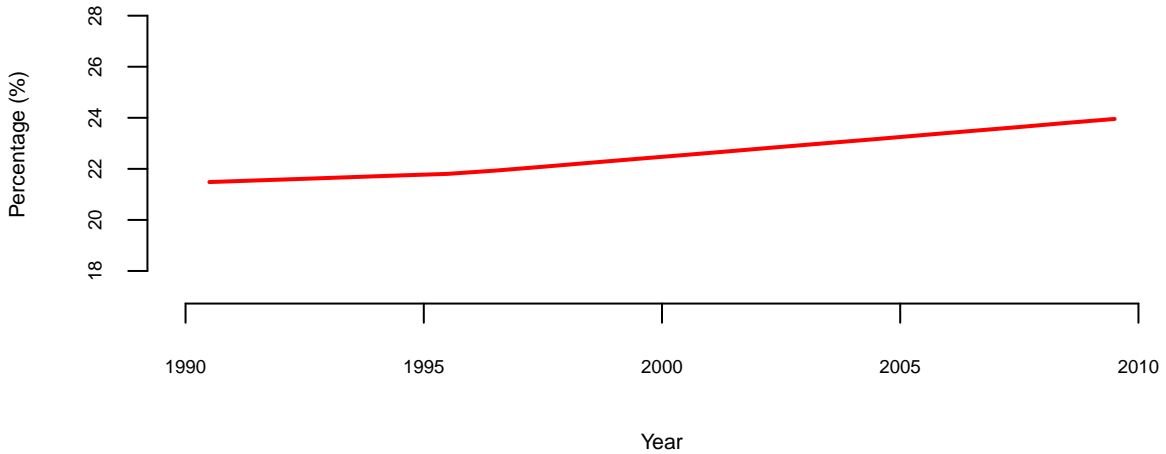



**Guyana**  
**Data, and estimated NMR**

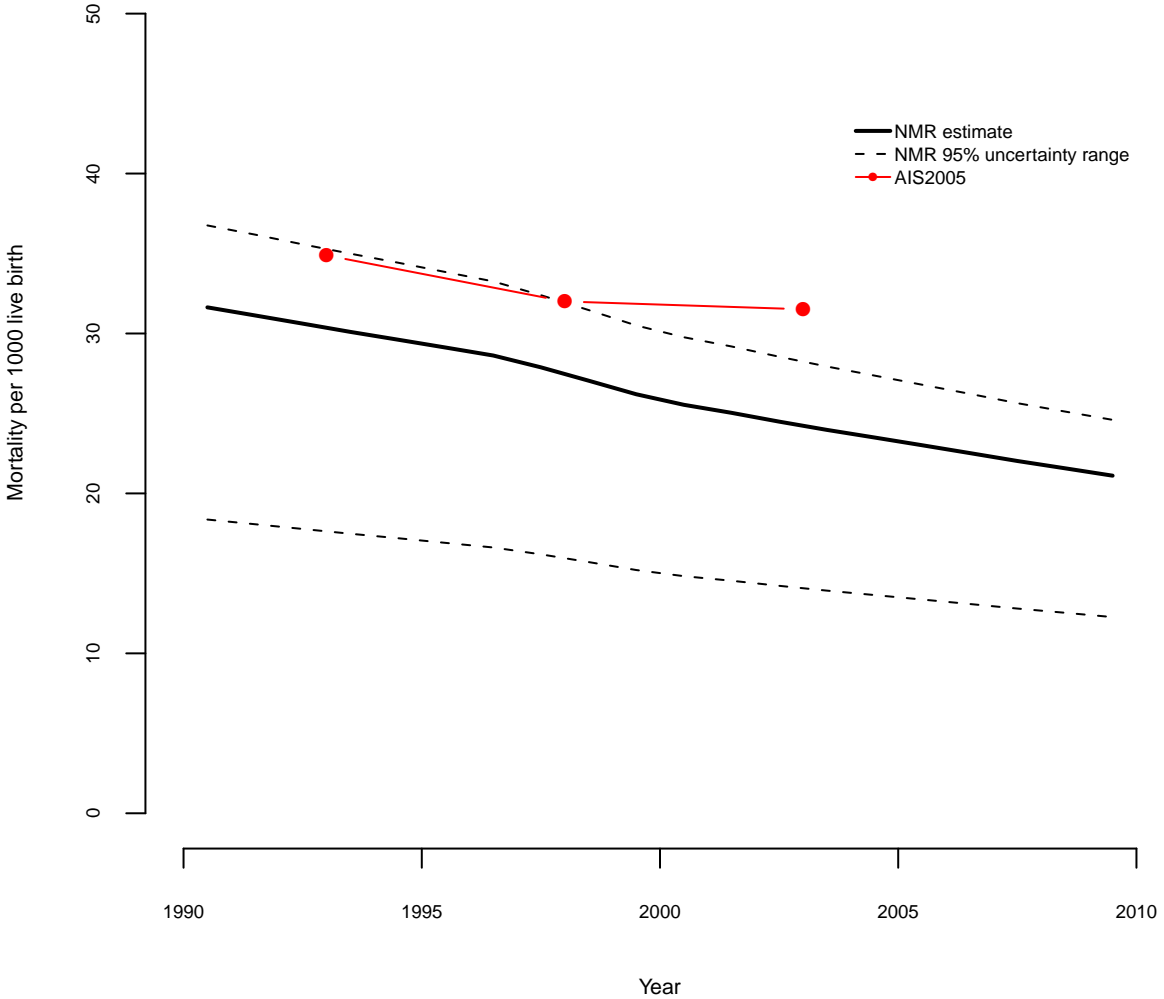

### Guyana NMR and U5MR

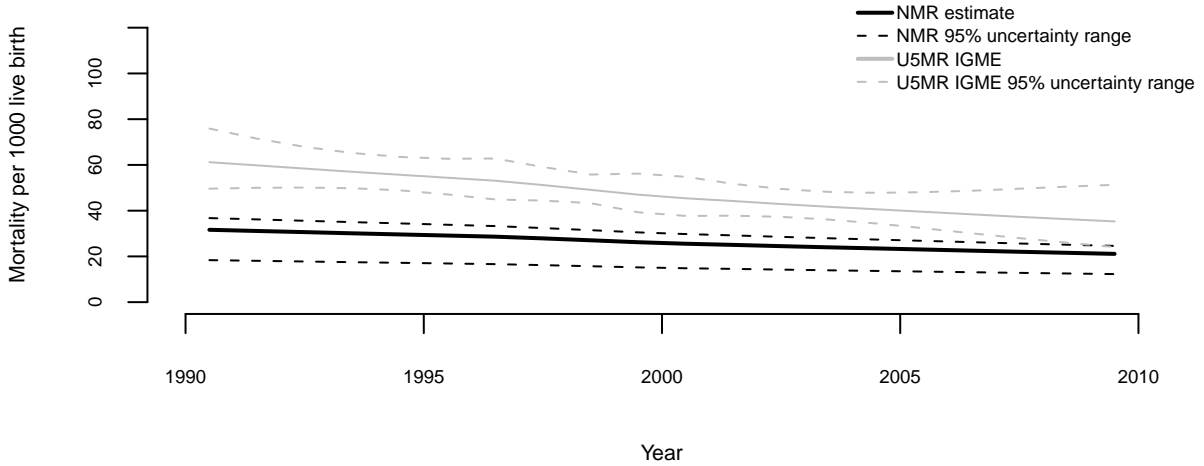

### Guyana NMR as percentage of U5MR

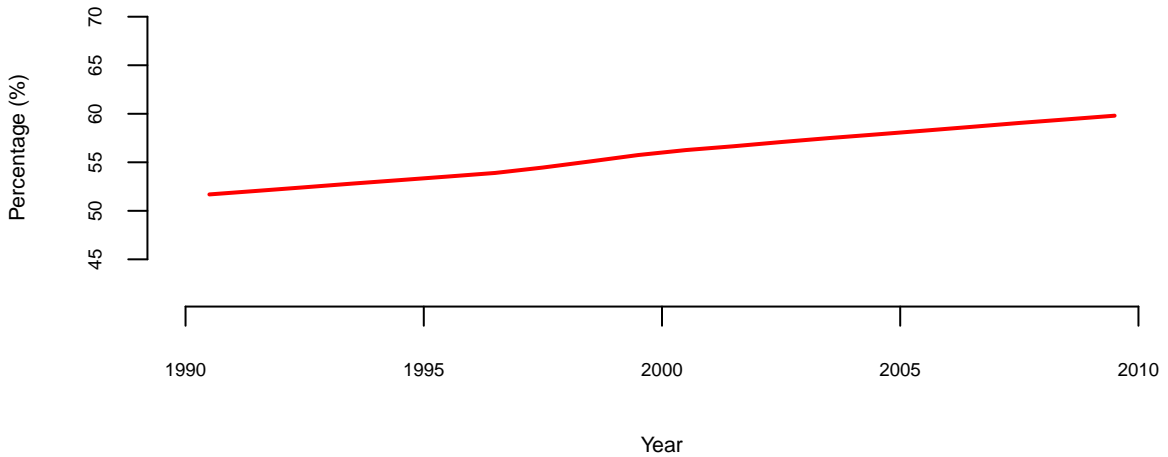

# Haiti

## Data, and estimated NMR

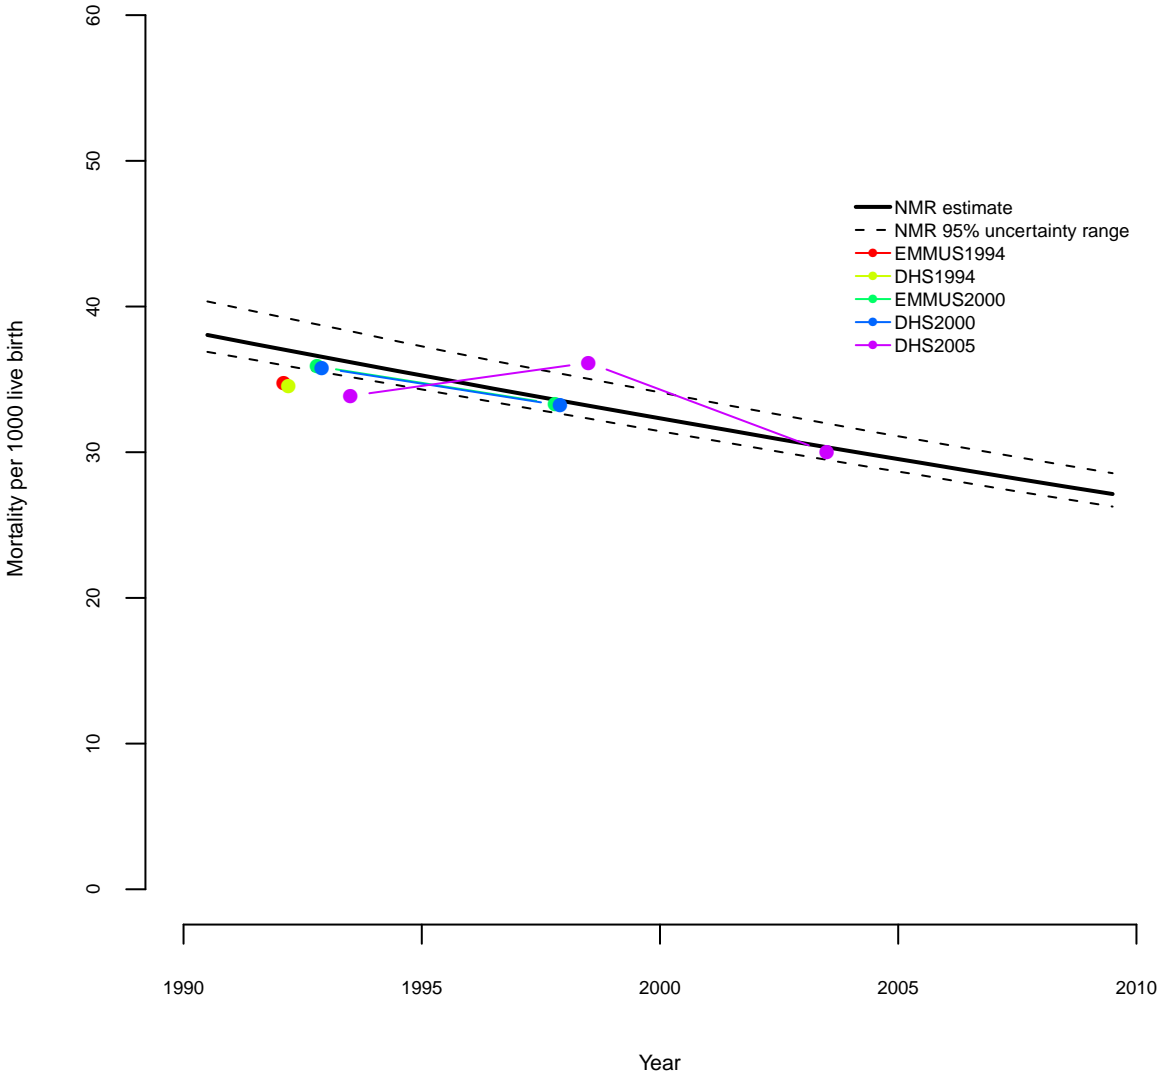

### Haiti NMR and U5MR

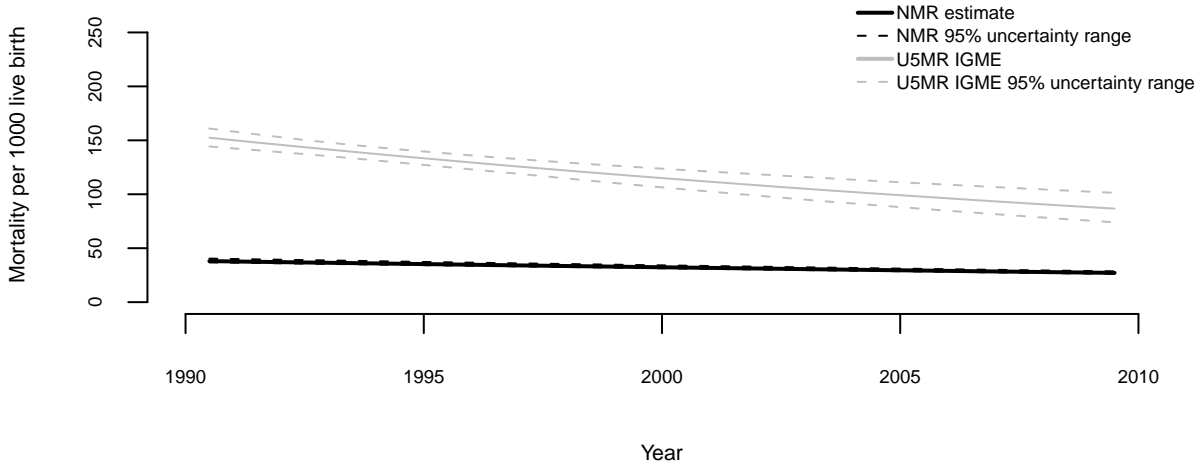

### Haiti NMR as percentage of U5MR

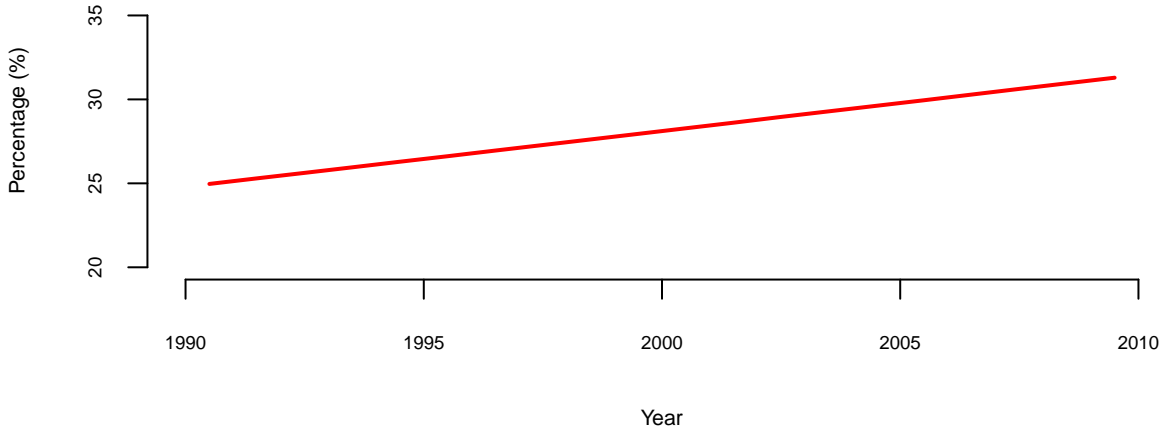

### Honduras Data, and estimated NMR

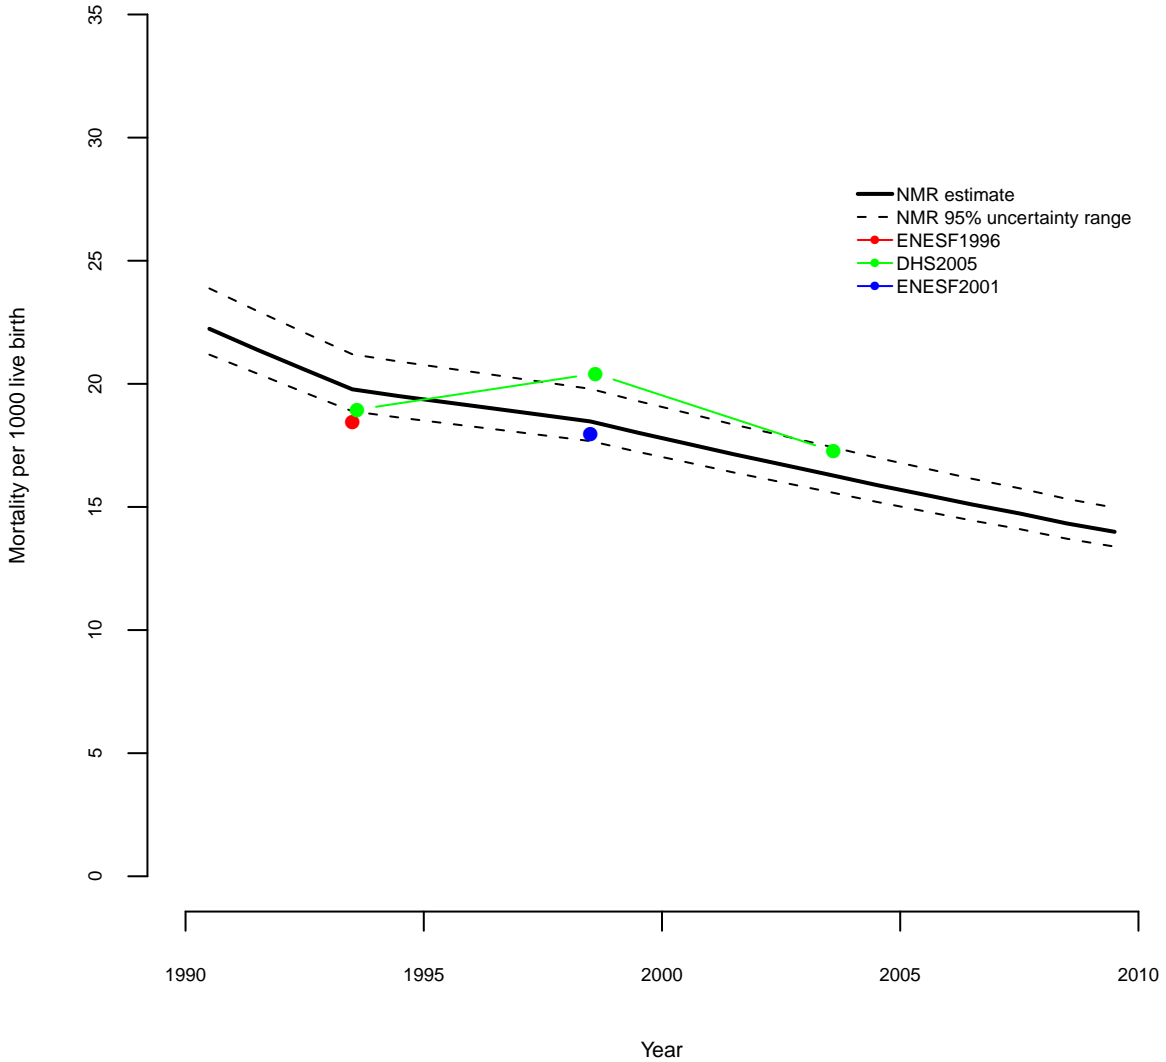

### Honduras NMR and U5MR

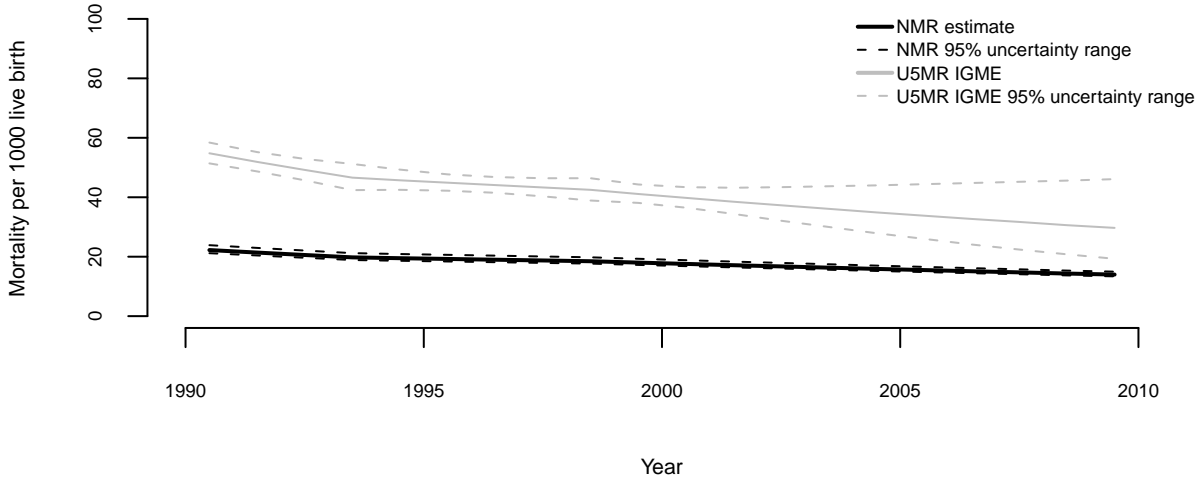

### Honduras NMR as percentage of U5MR

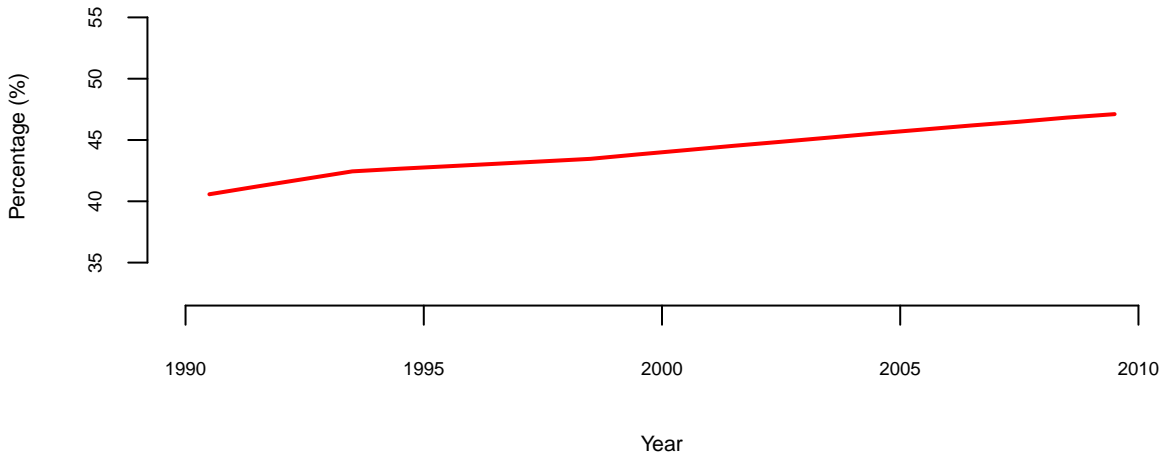

# Hungary

## Data, and estimated NMR

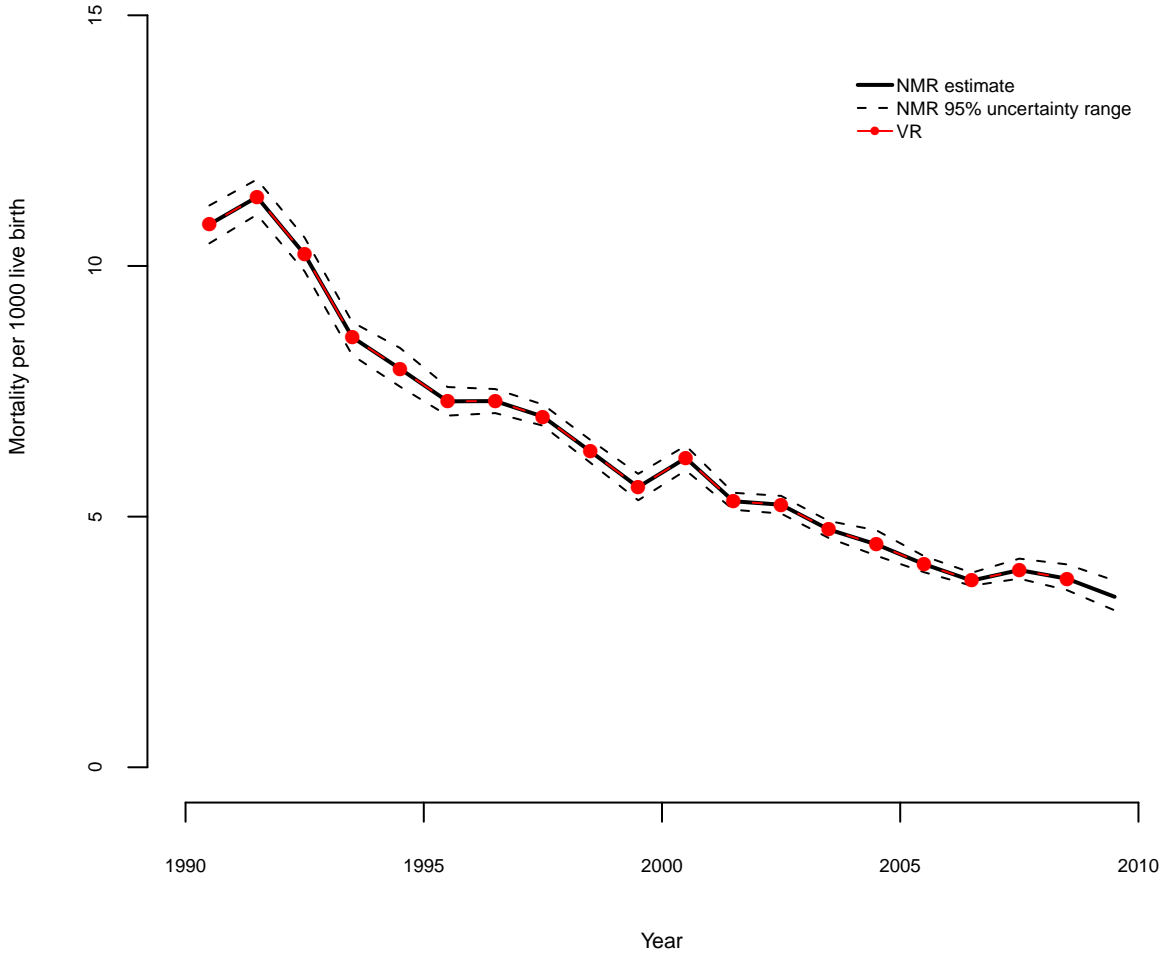

### Hungary NMR and U5MR

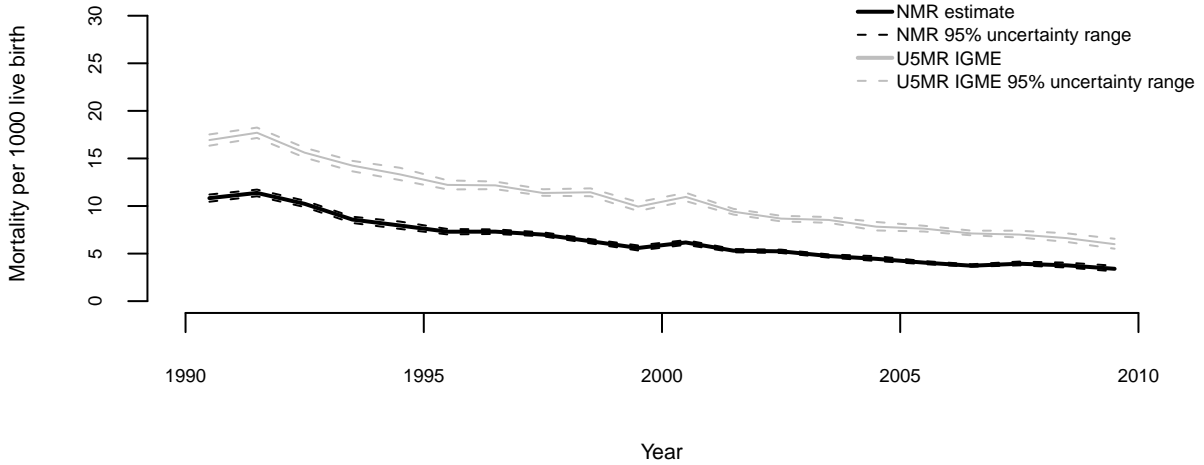

### Hungary NMR as percentage of U5MR

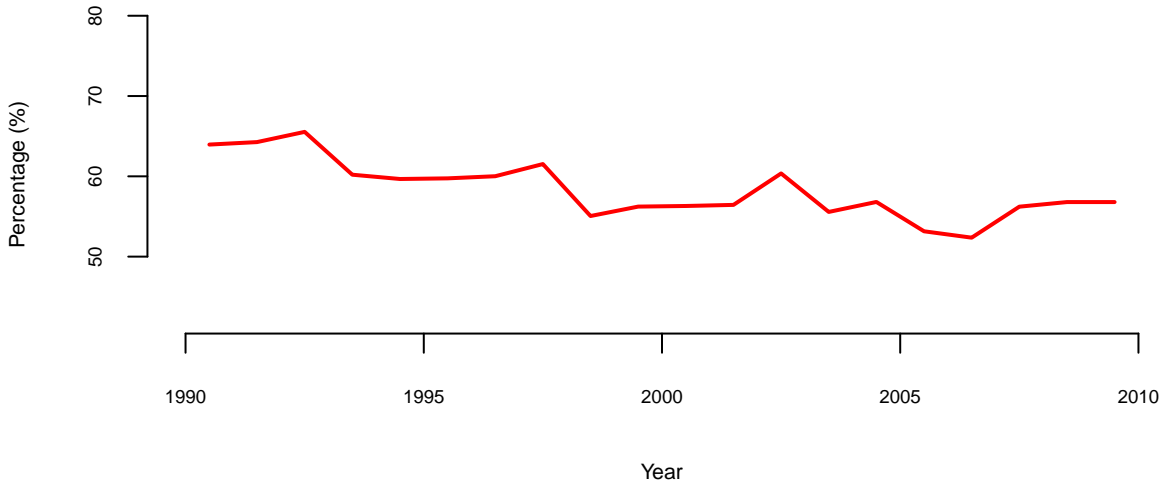



Iceland  
Data, and estimated NMR

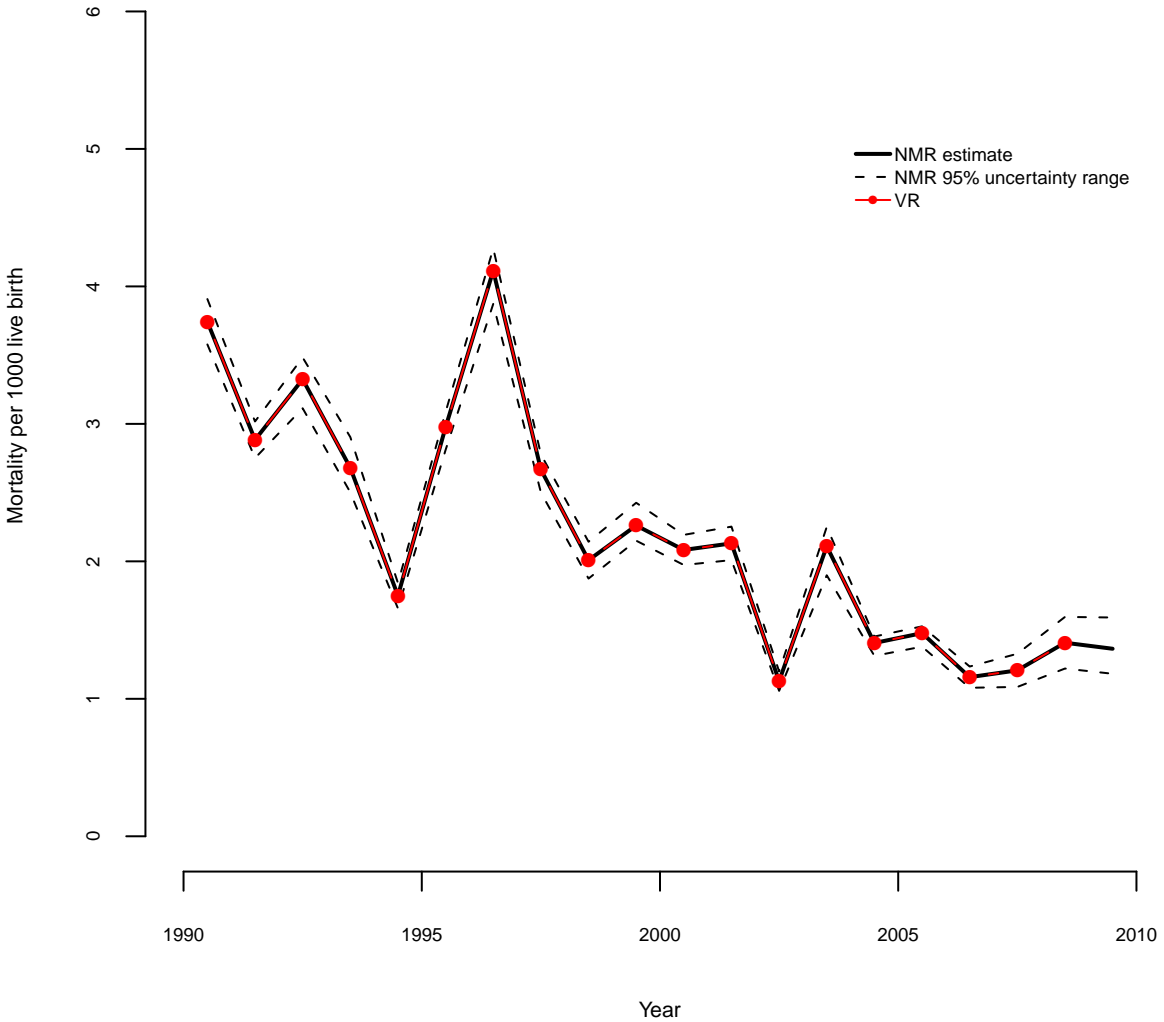

### Iceland NMR and U5MR

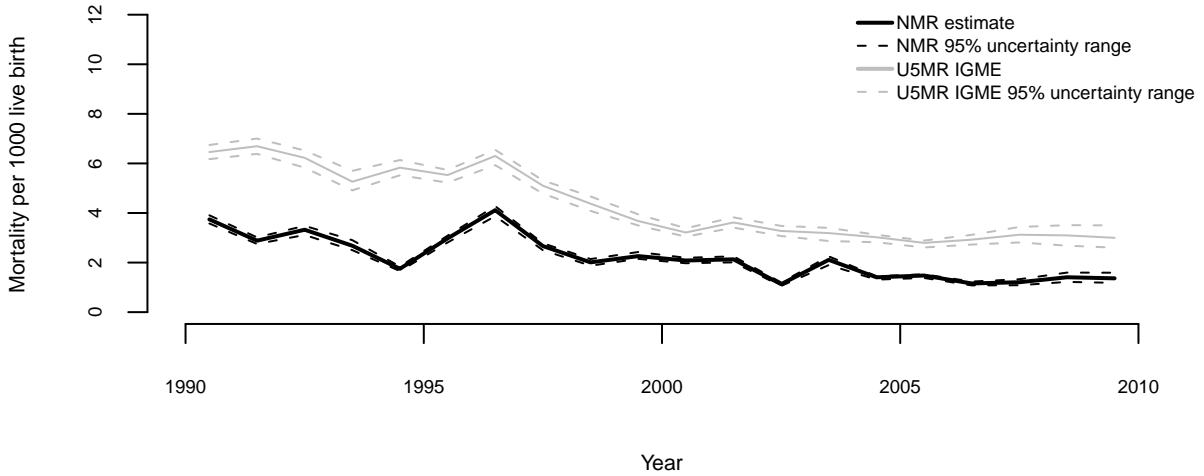

### Iceland NMR as percentage of U5MR

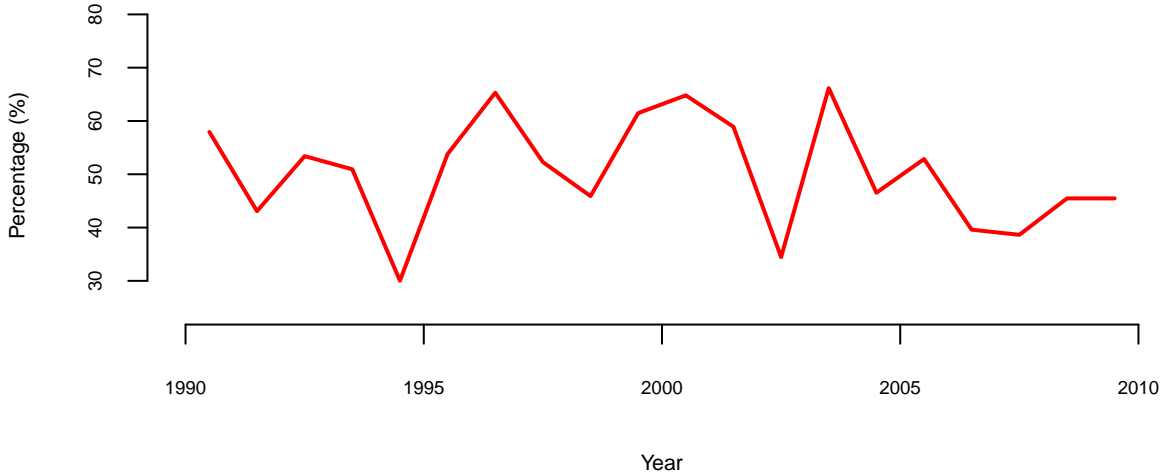

# India

## Data, and estimated NMR

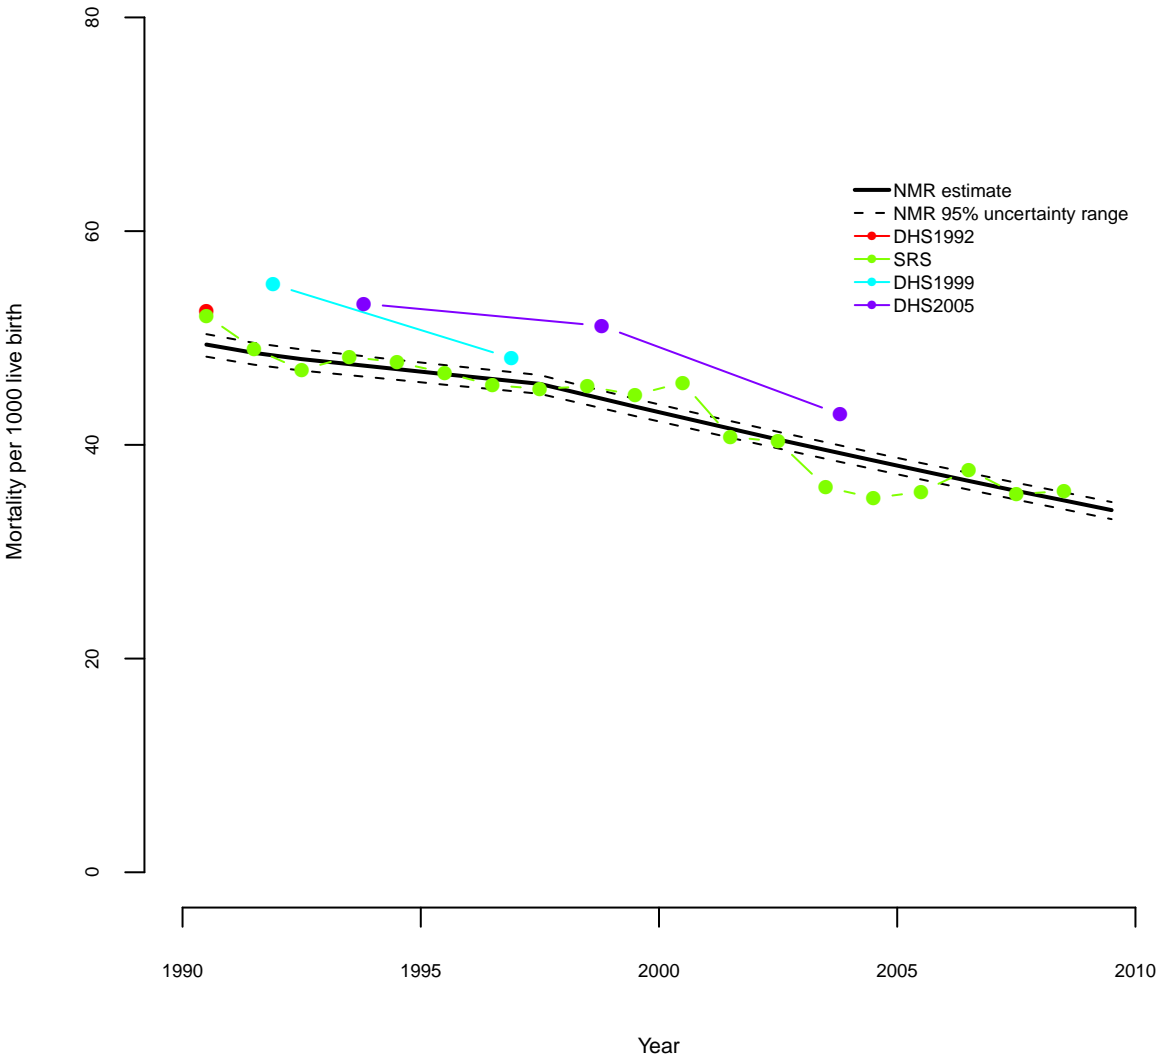

### India NMR and U5MR

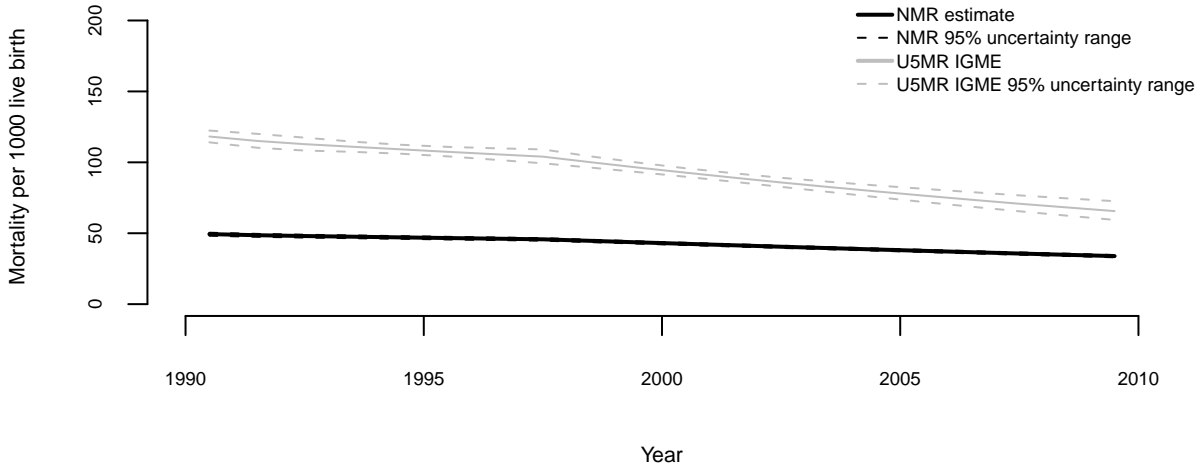

### India NMR as percentage of U5MR

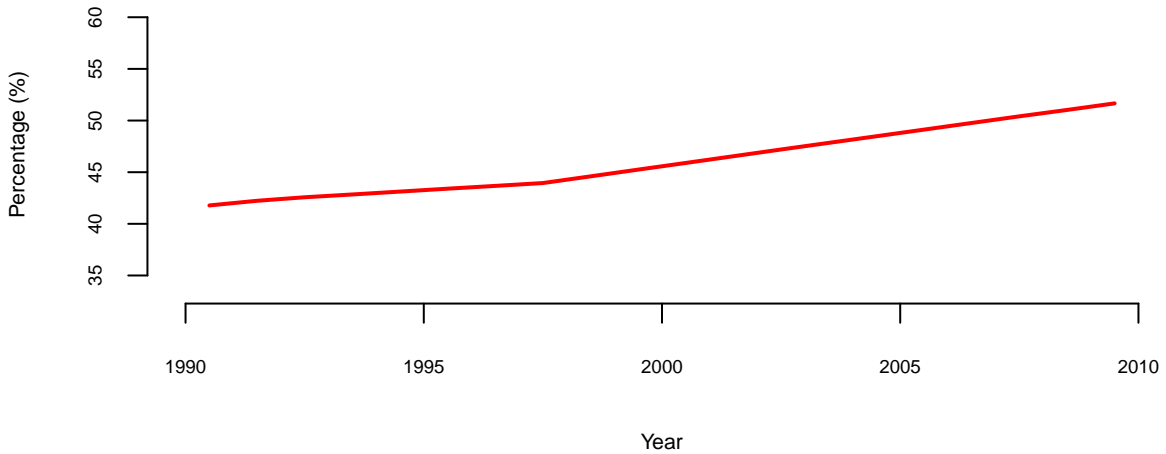

Indonesia  
Data, and estimated NMR

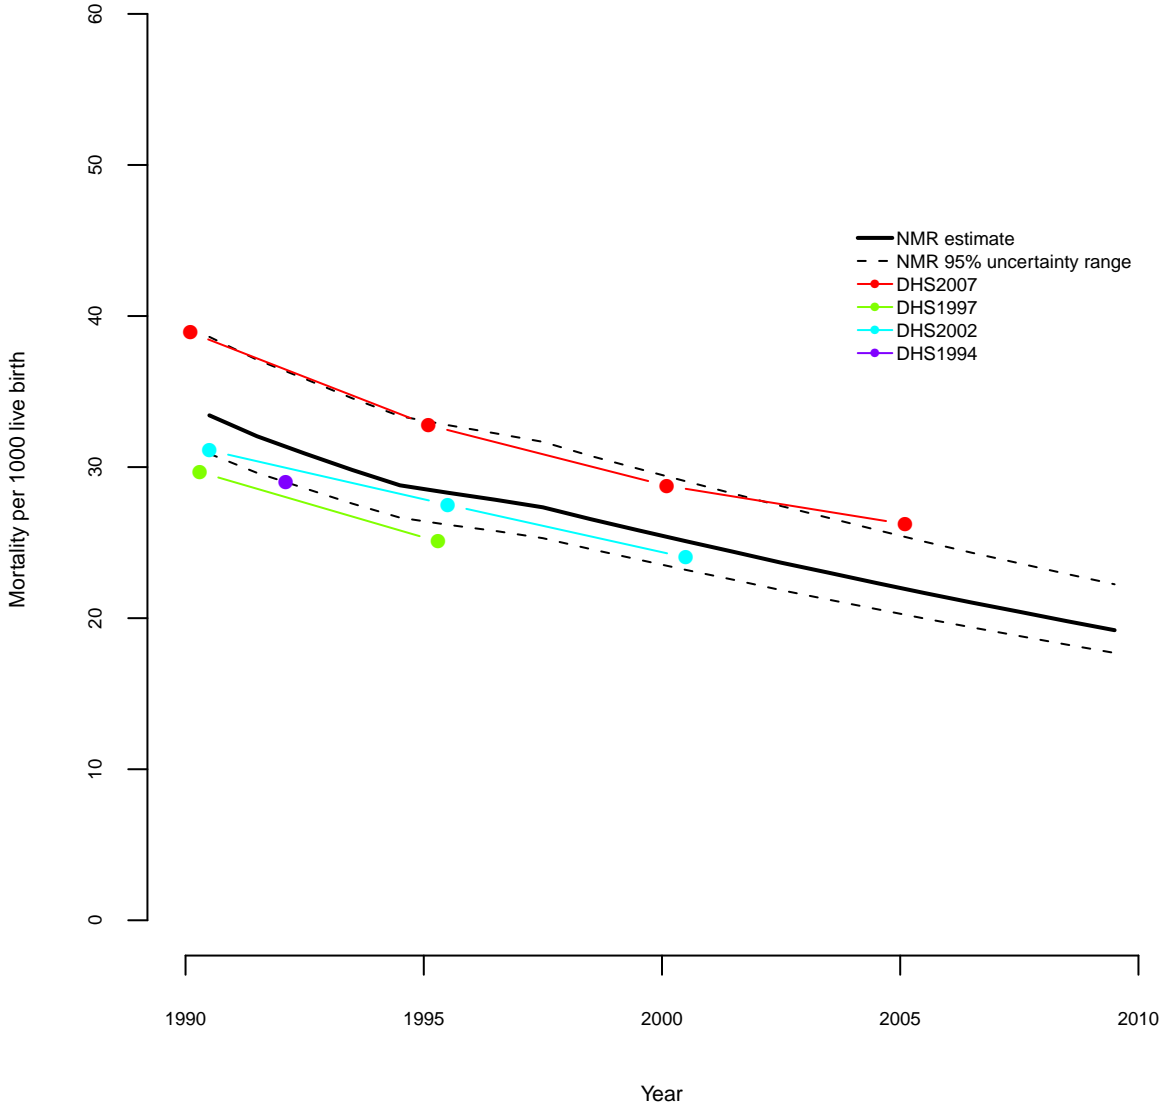

### Indonesia NMR and U5MR

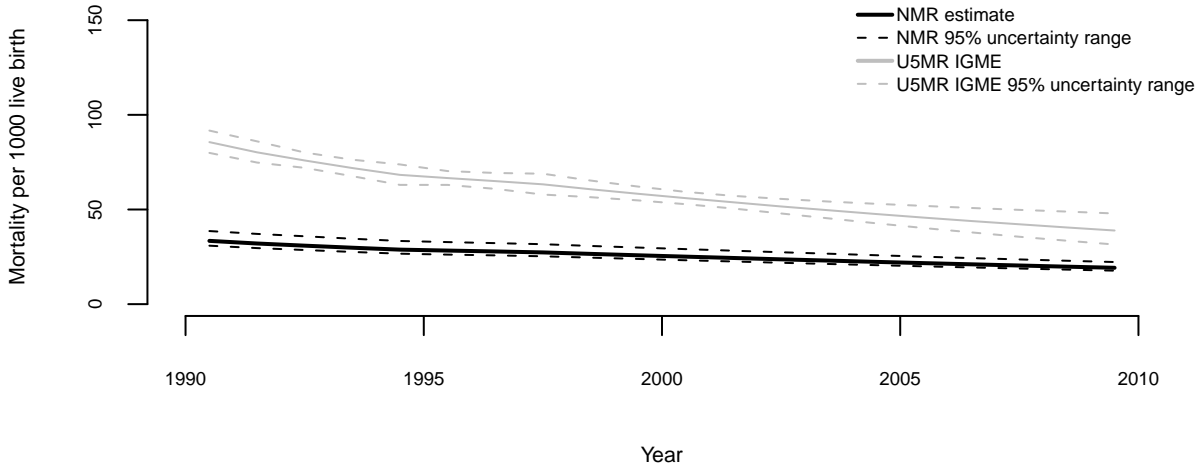

### Indonesia NMR as percentage of U5MR

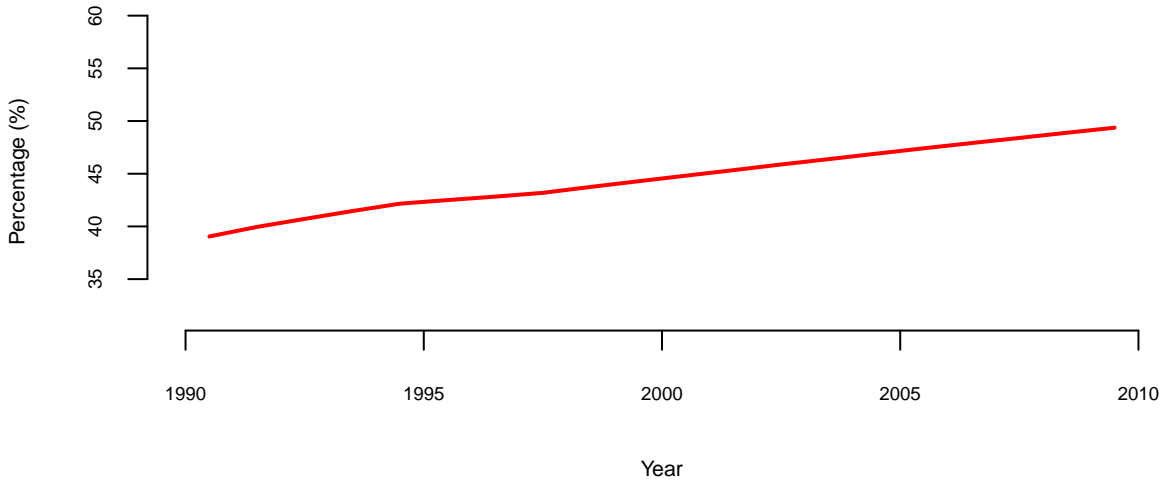

Iran (Islamic Republic of)  
Data, and estimated NMR

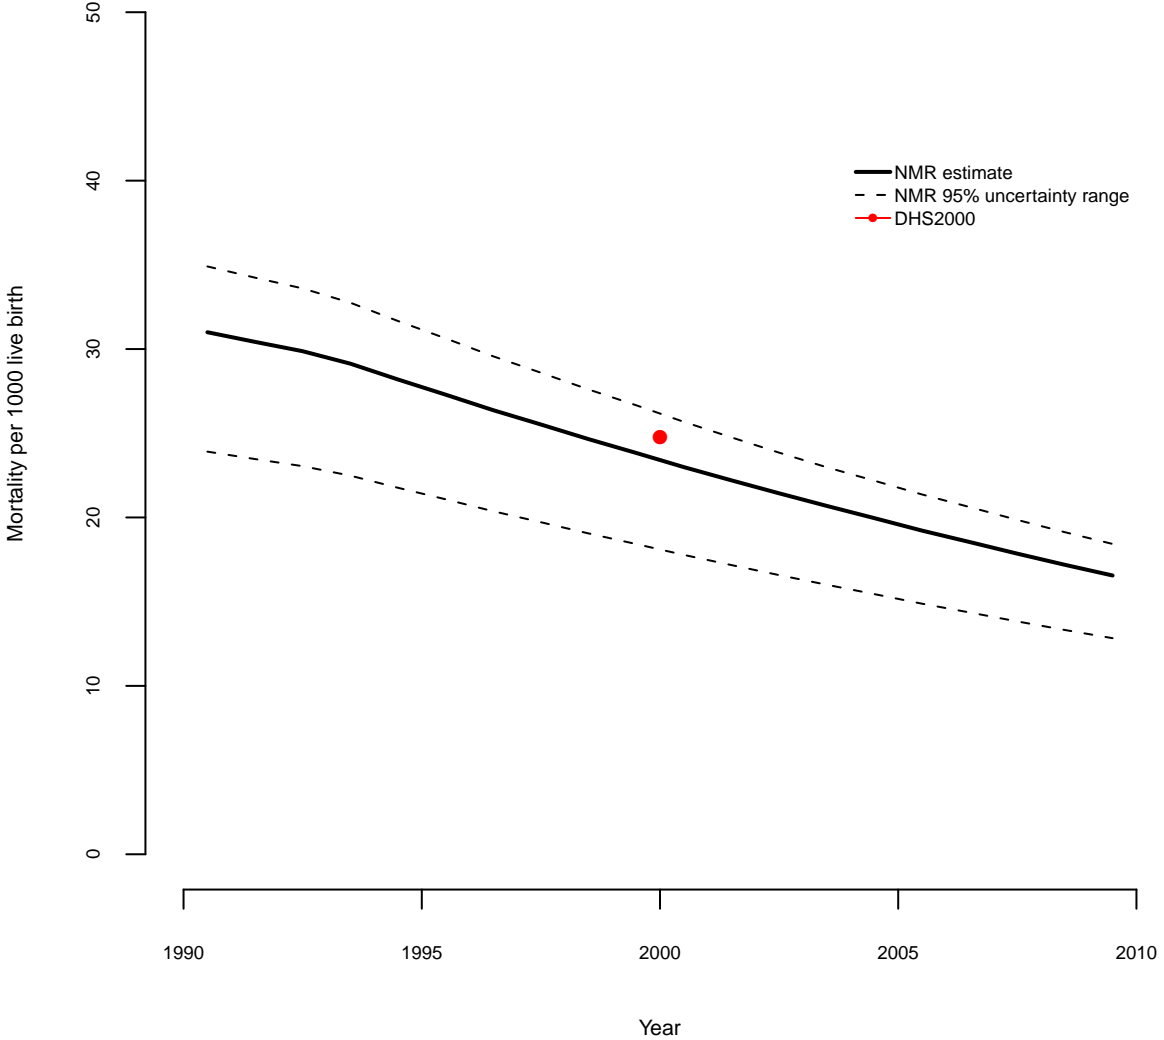

### Iran (Islamic Republic of) NMR and U5MR

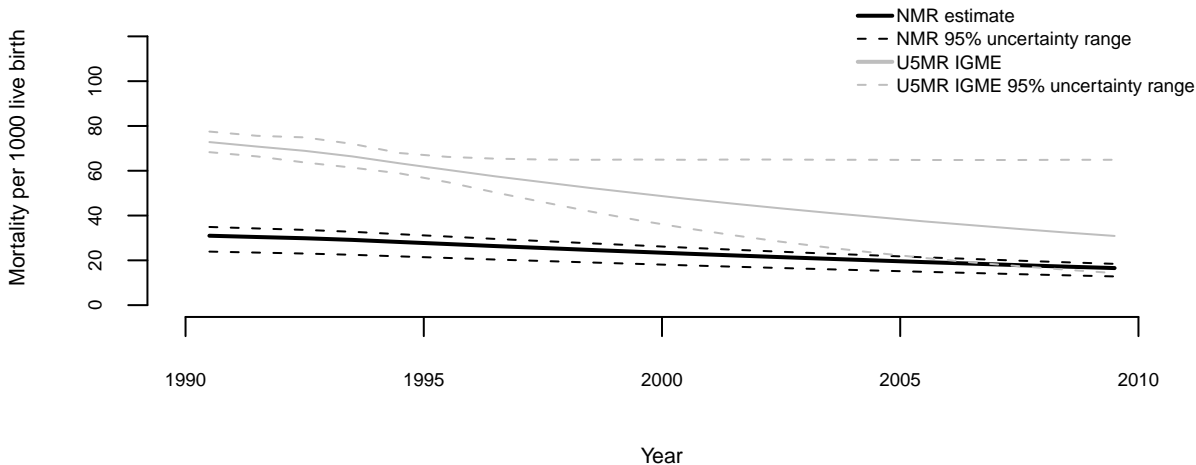

### Iran (Islamic Republic of) NMR as percentage of U5MR

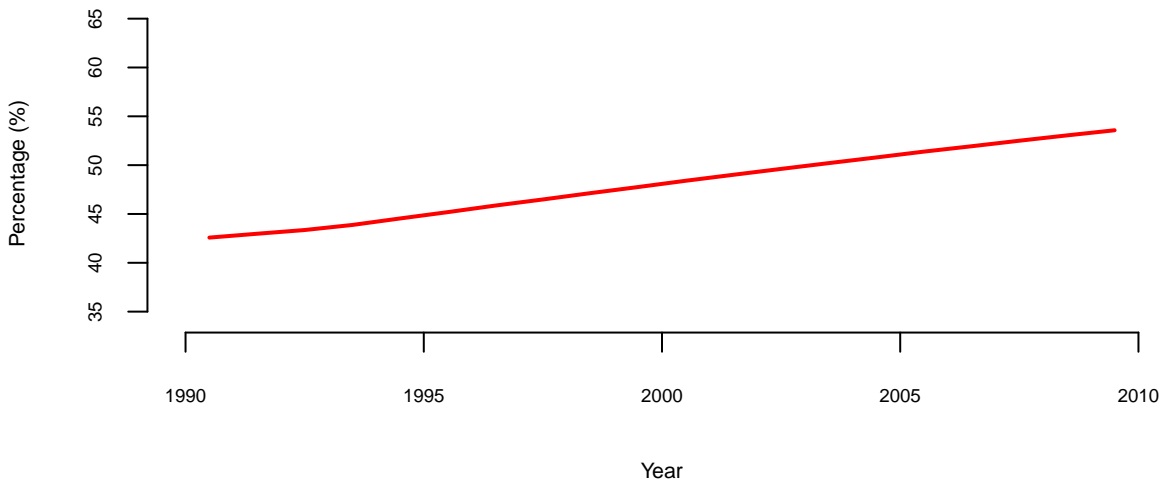



Iraq  
Data, and estimated NMR

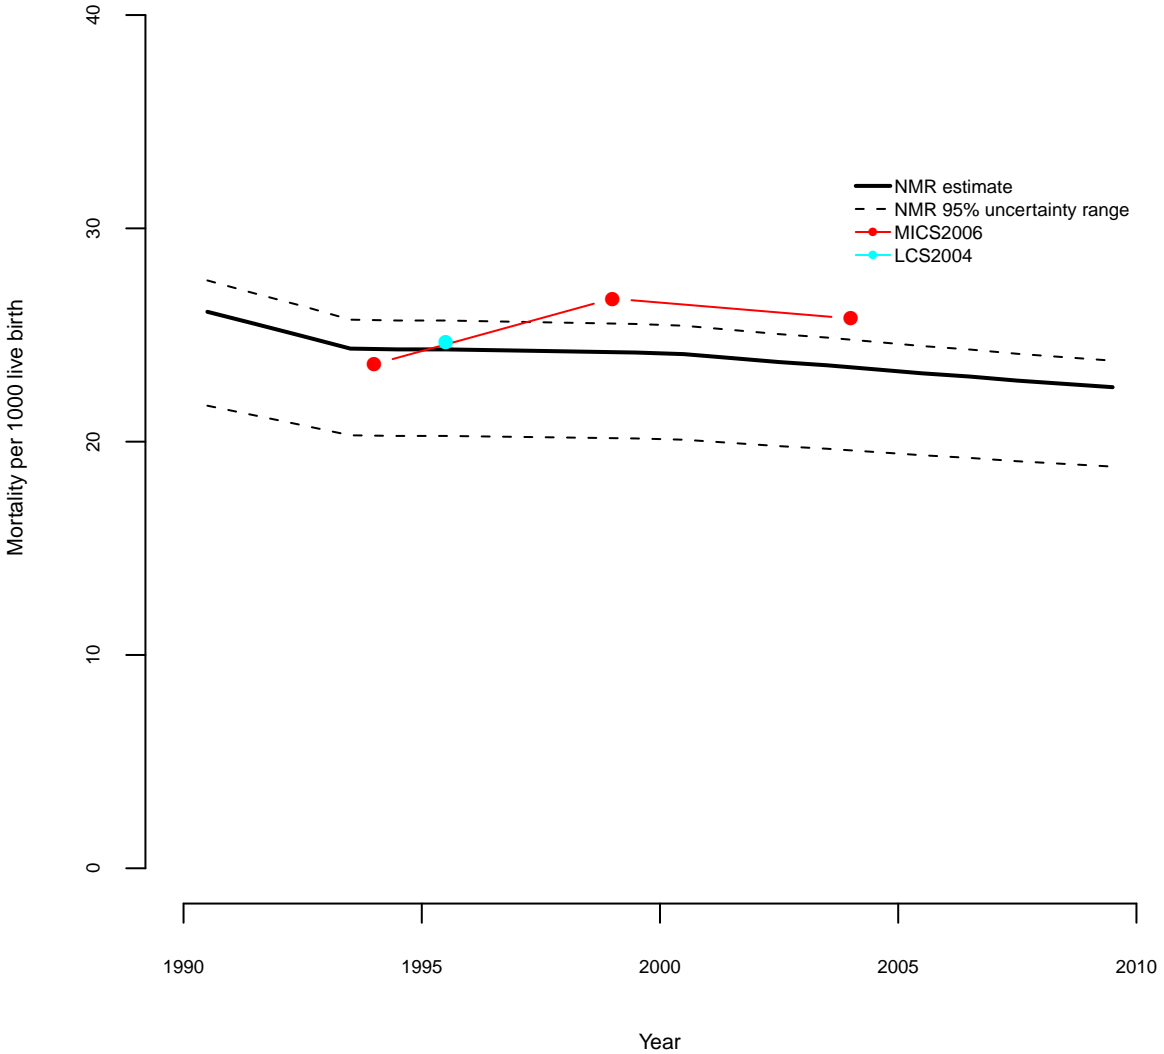

### Iraq NMR and U5MR

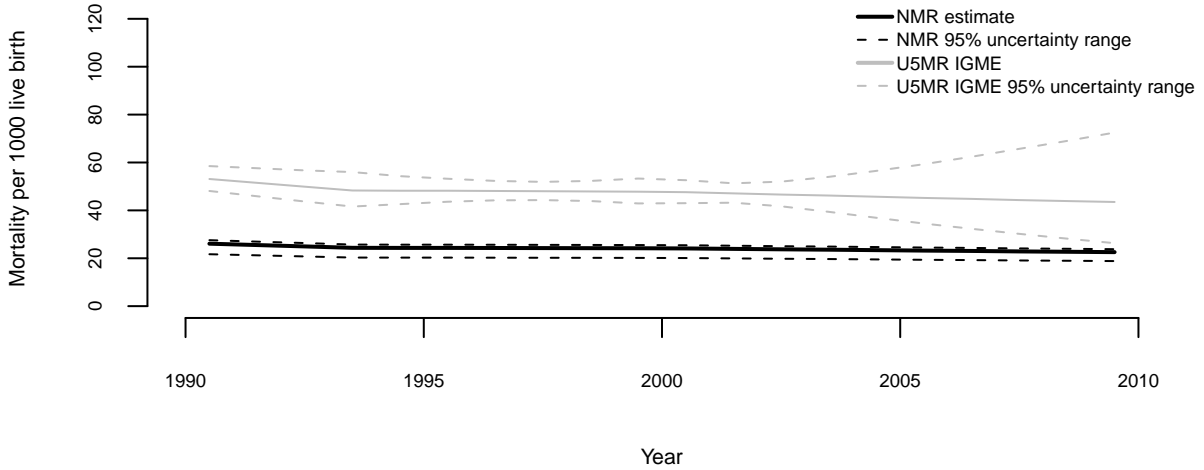

### Iraq NMR as percentage of U5MR

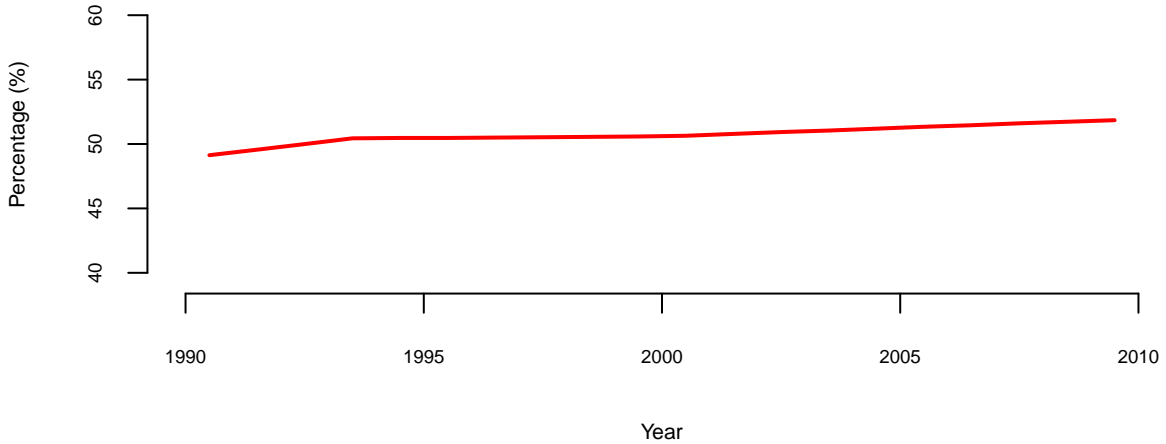

### Ireland Data, and estimated NMR

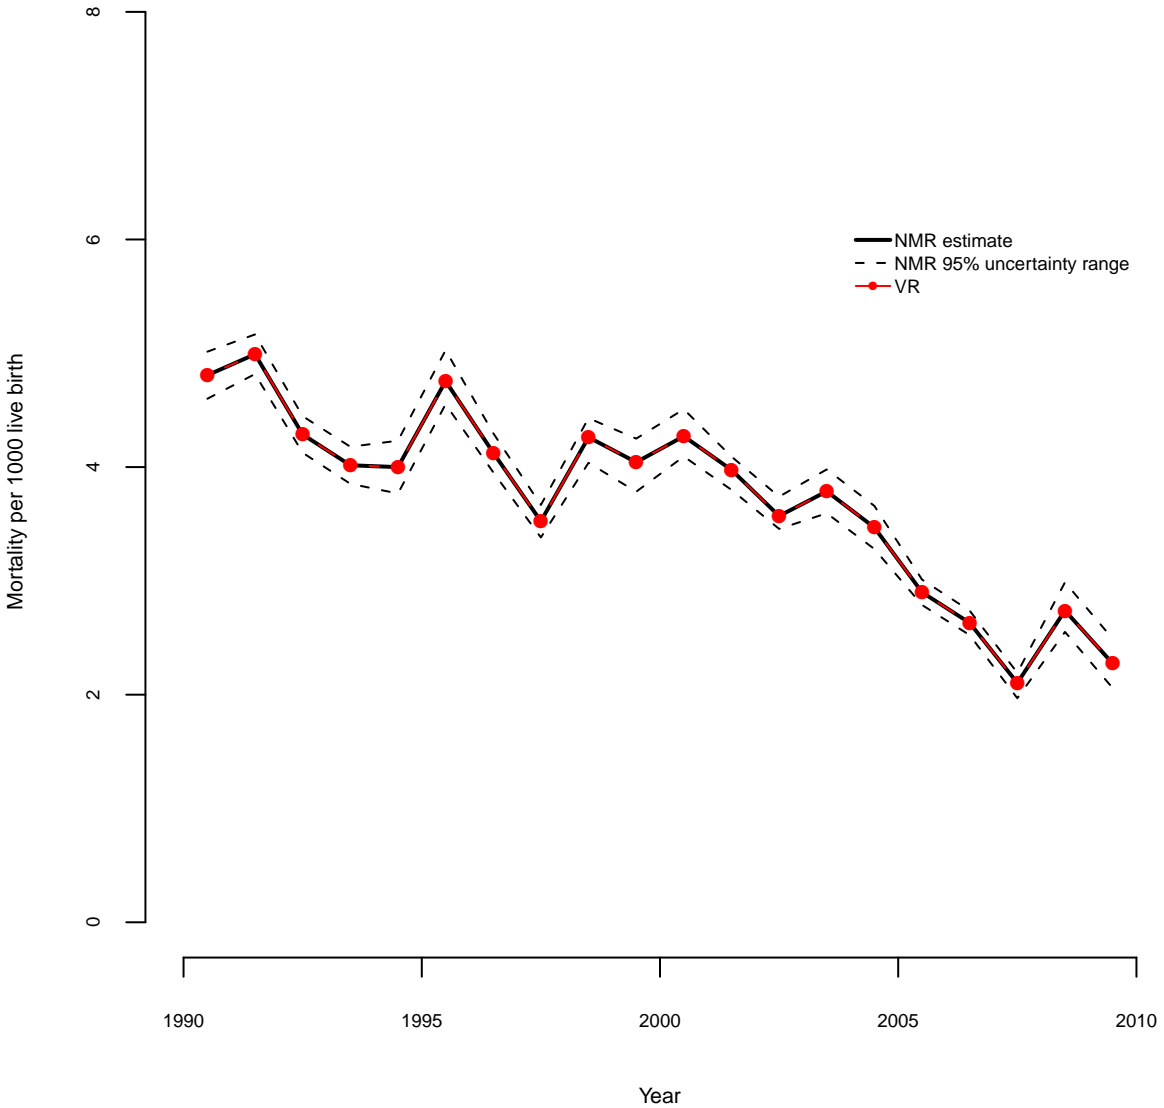

### Ireland NMR and U5MR

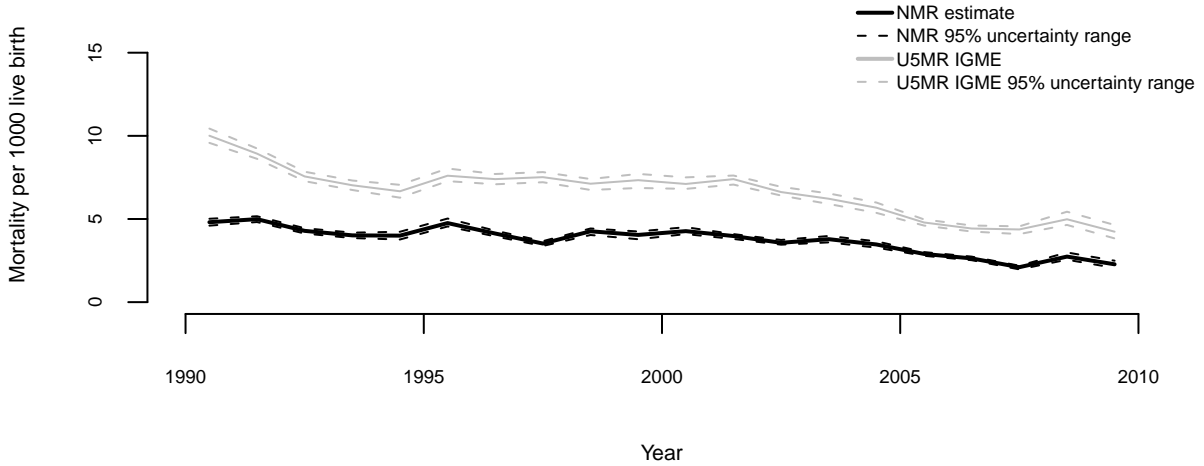

### Ireland NMR as percentage of U5MR

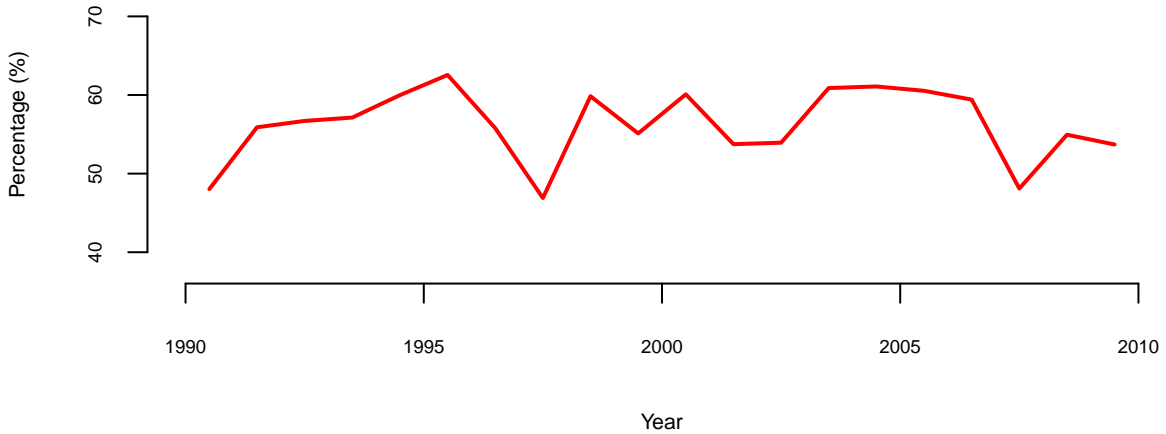

Israel  
Data, and estimated NMR

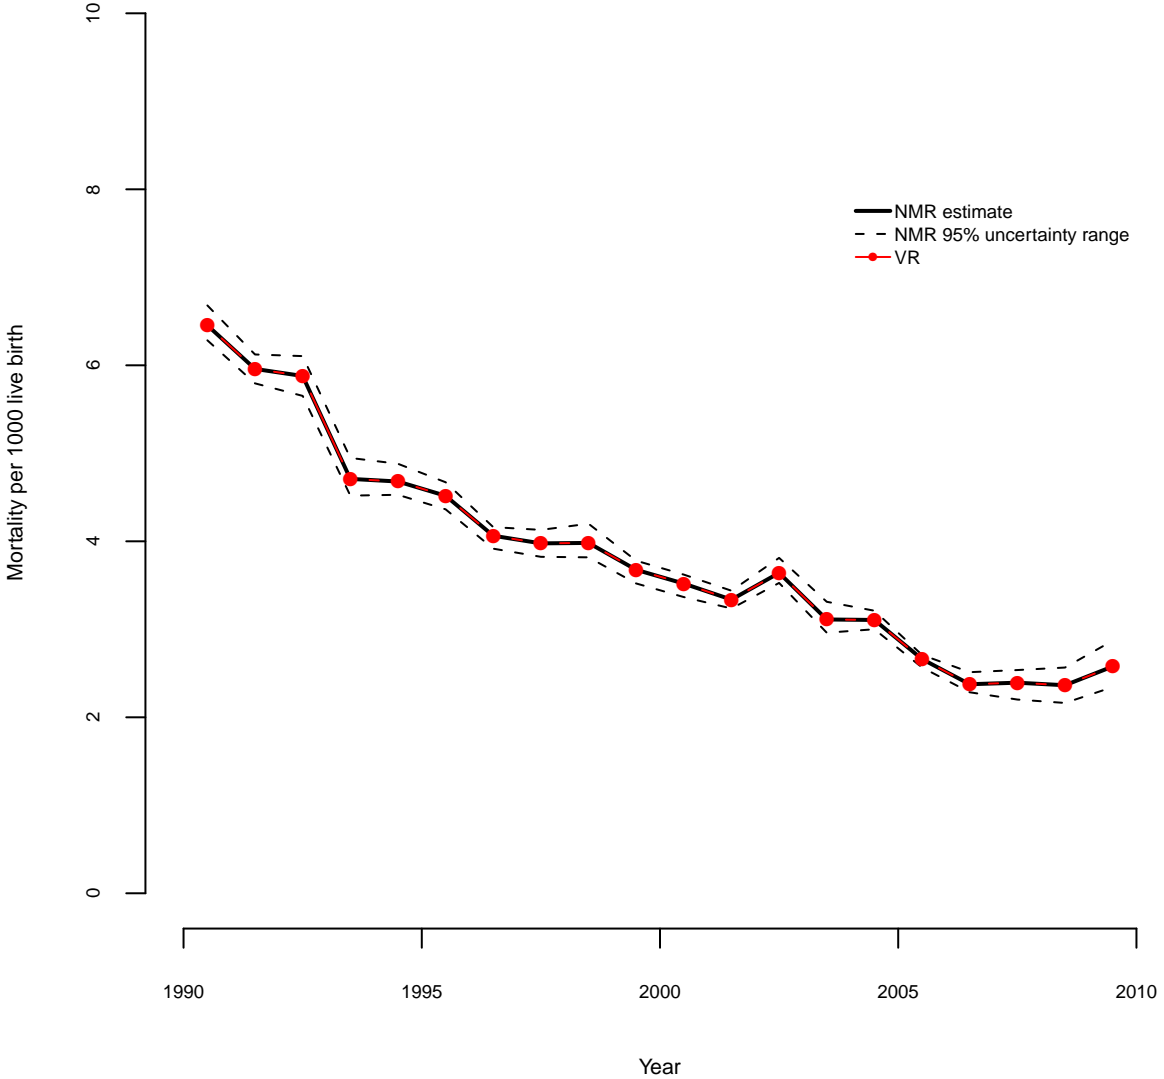

### Israel NMR and U5MR

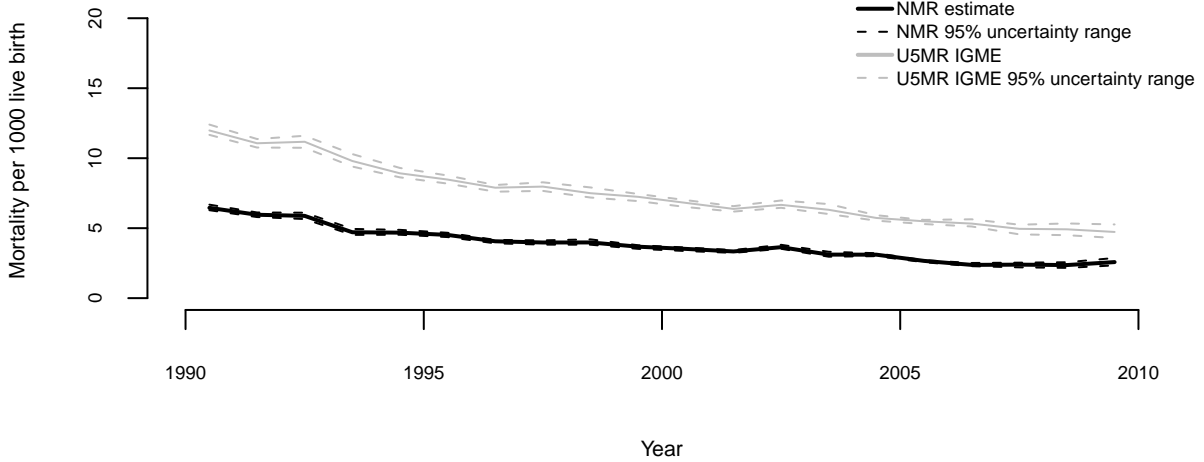

### Israel NMR as percentage of U5MR

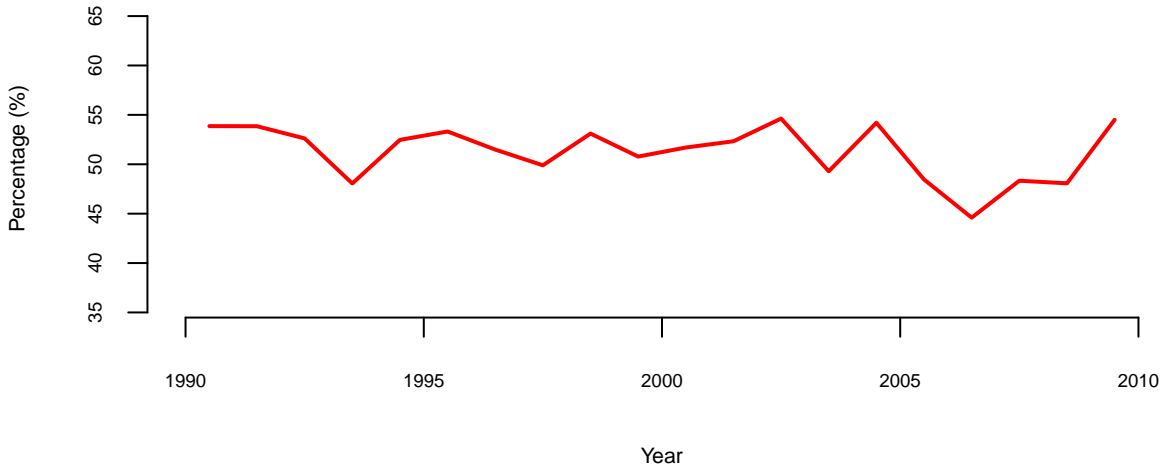

Italy  
Data, and estimated NMR

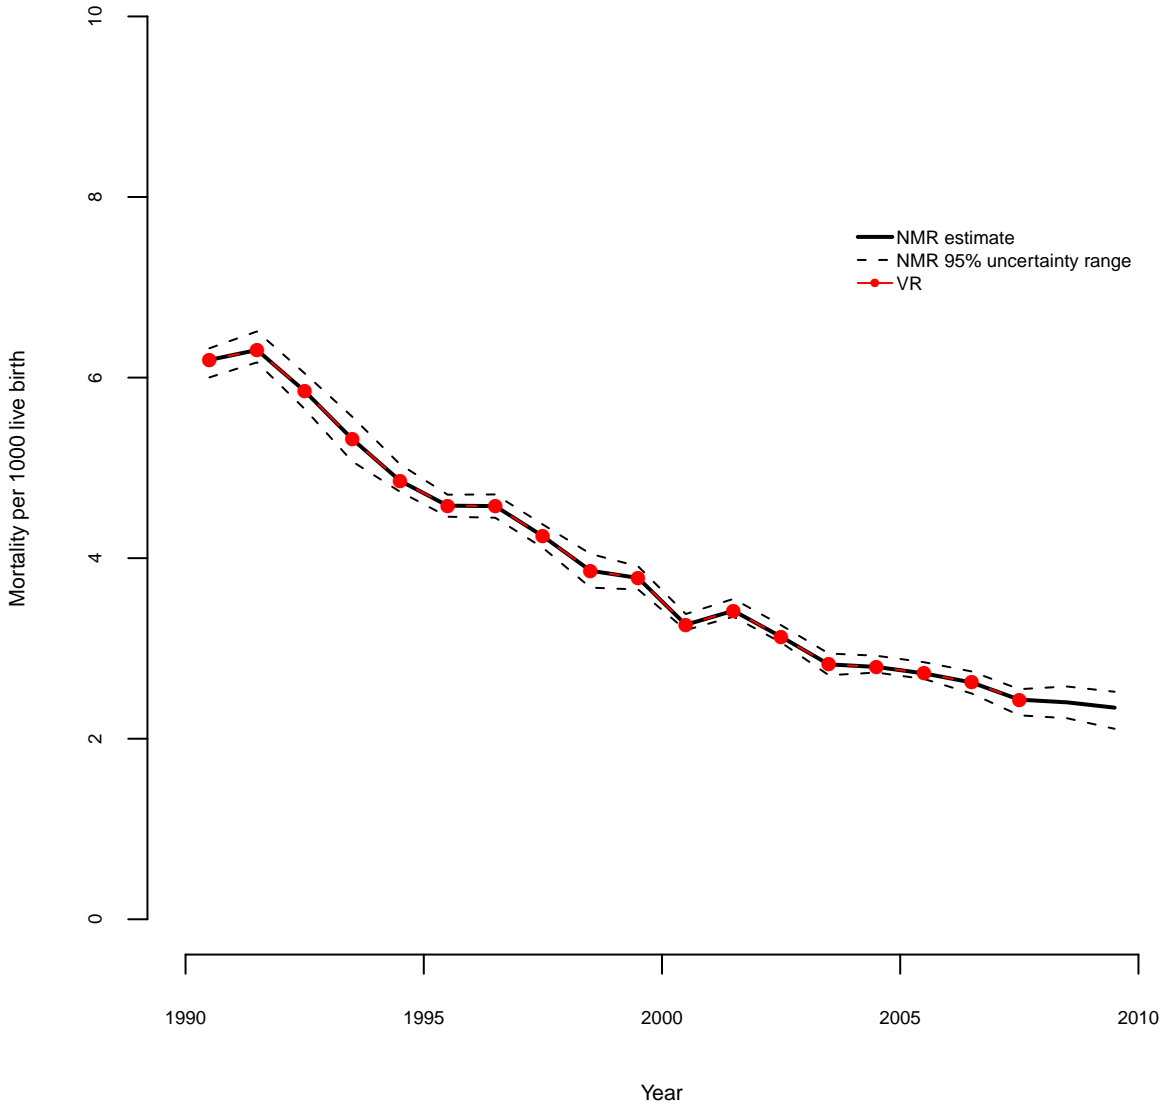

### Italy NMR and U5MR

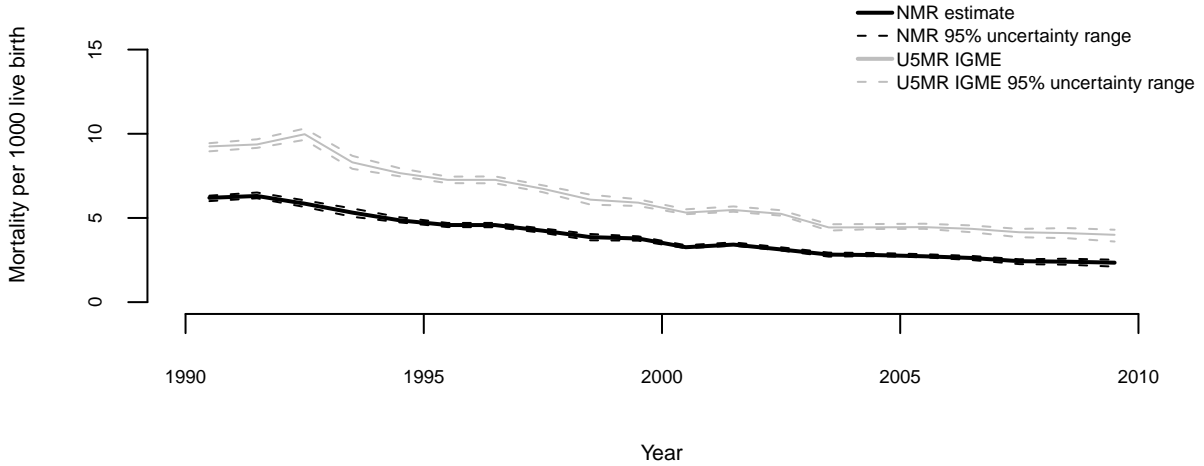

### Italy NMR as percentage of U5MR

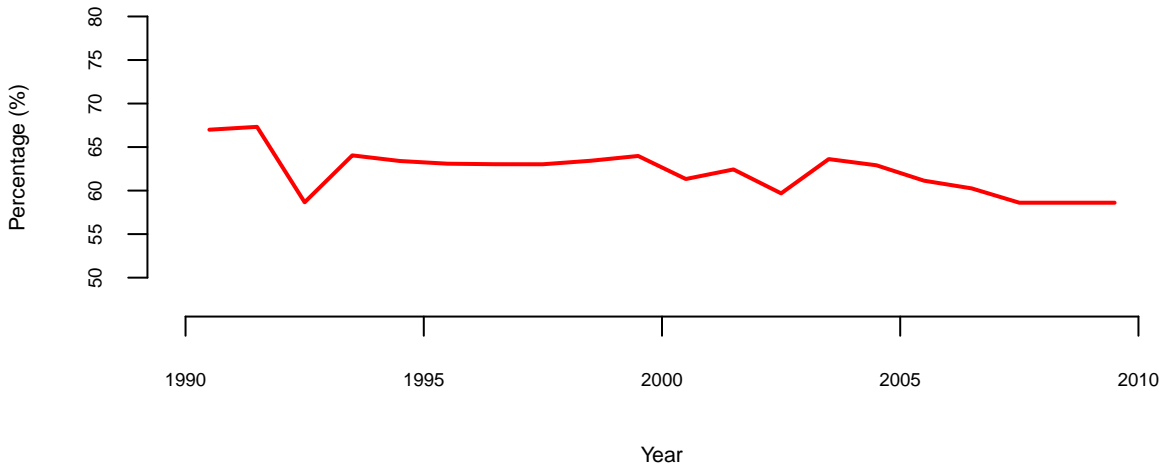



**Jamaica**  
**Data, and estimated NMR**

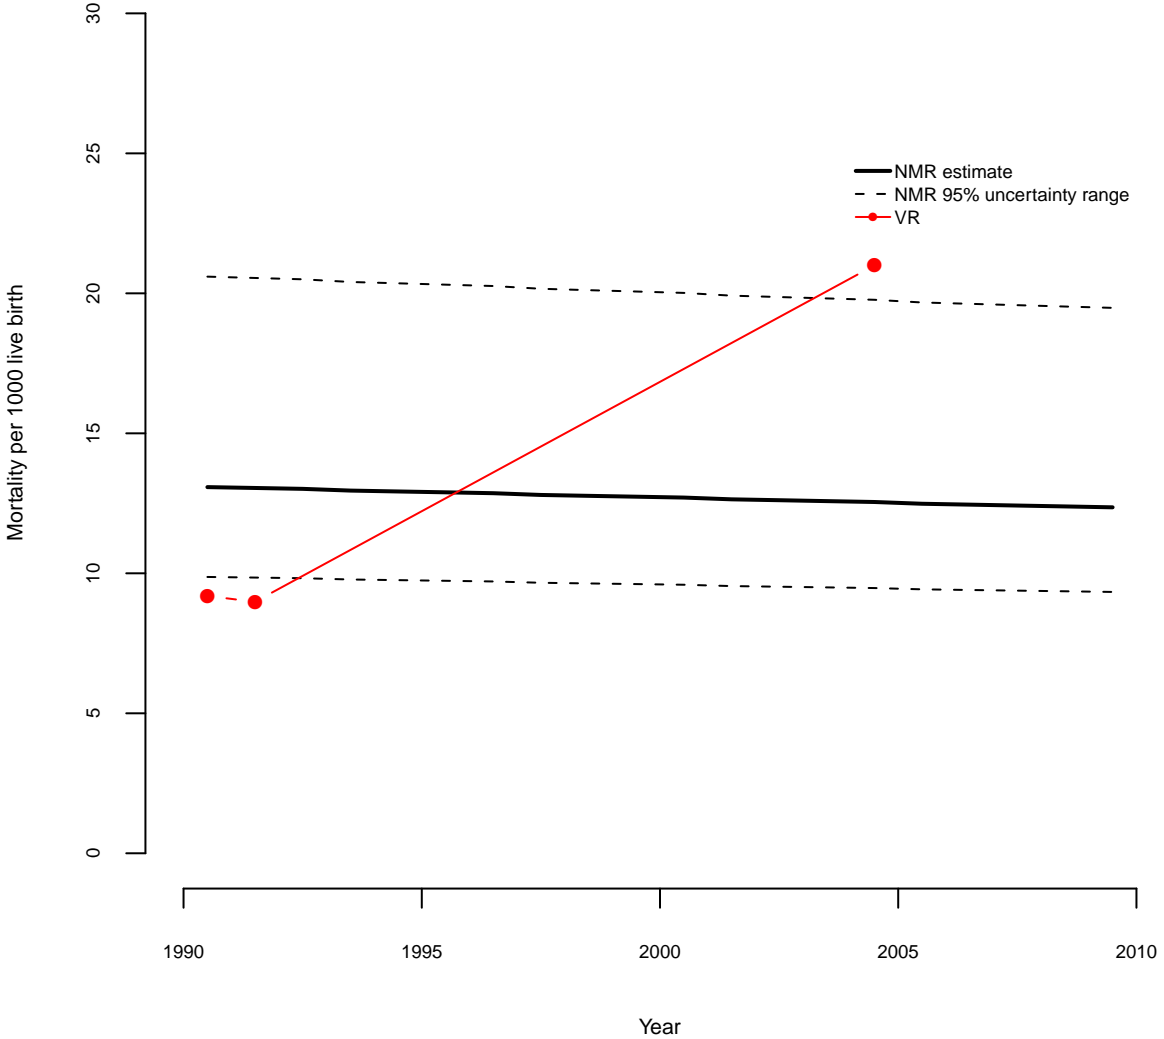

### Jamaica NMR and U5MR

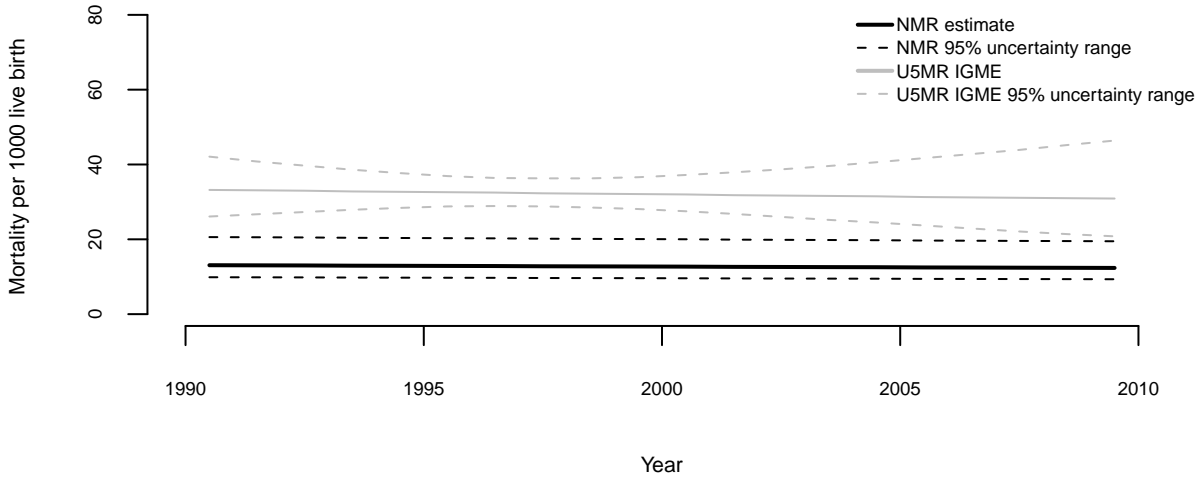

### Jamaica NMR as percentage of U5MR

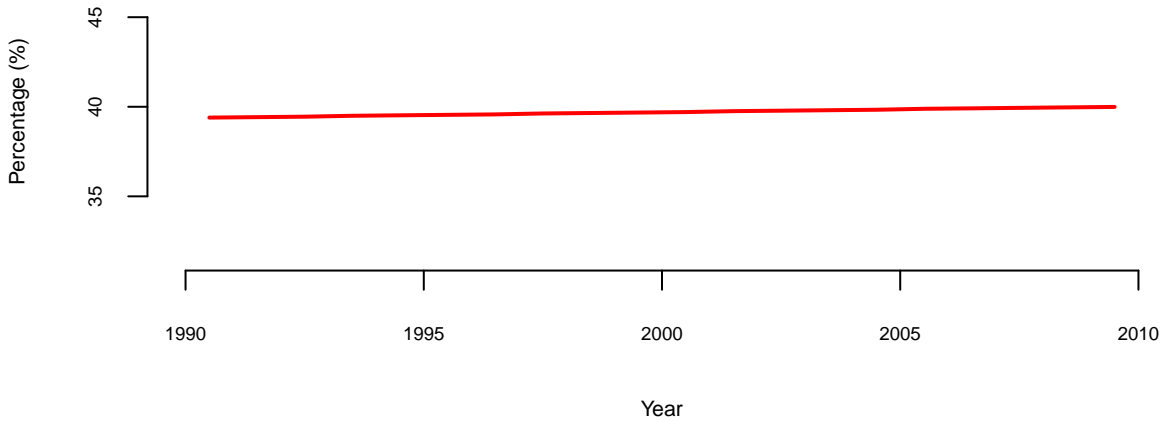

# Japan

## Data, and estimated NMR

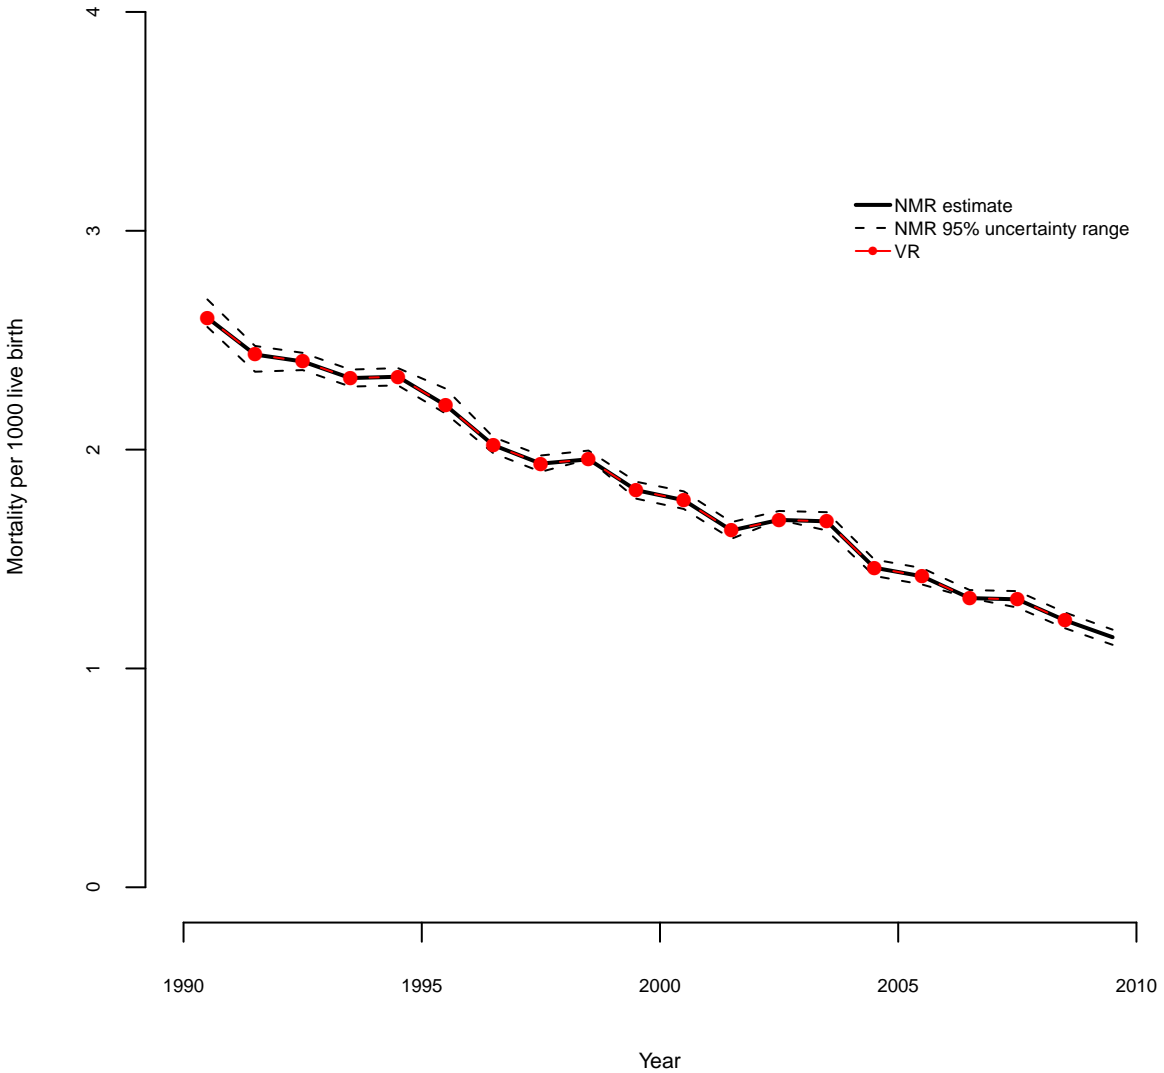

### Japan NMR and U5MR

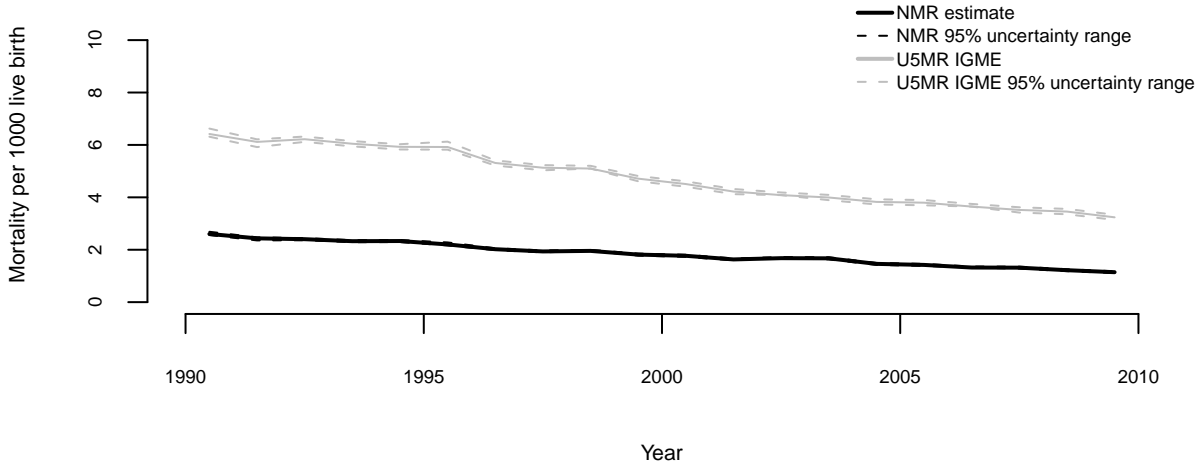

### Japan NMR as percentage of U5MR

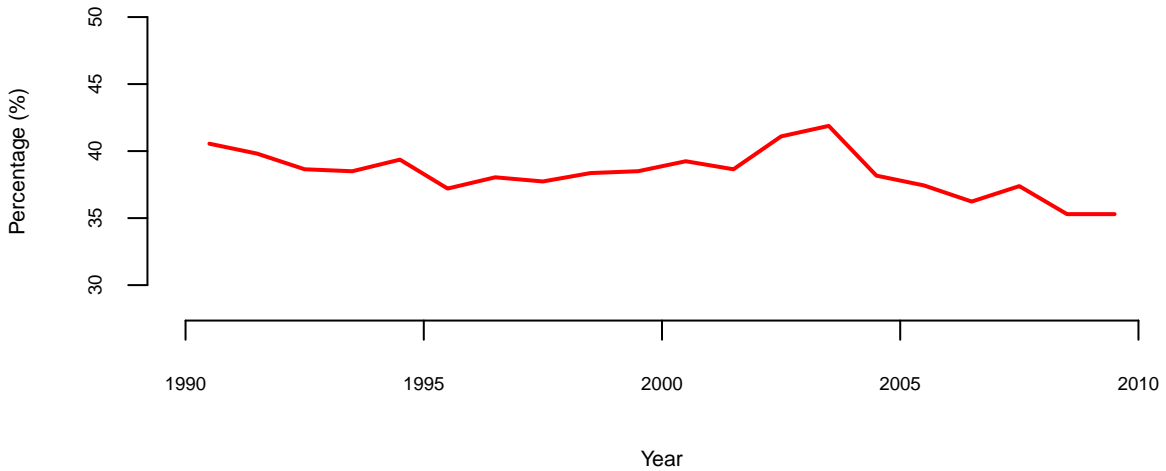

**Jordan**  
**Data, and estimated NMR**

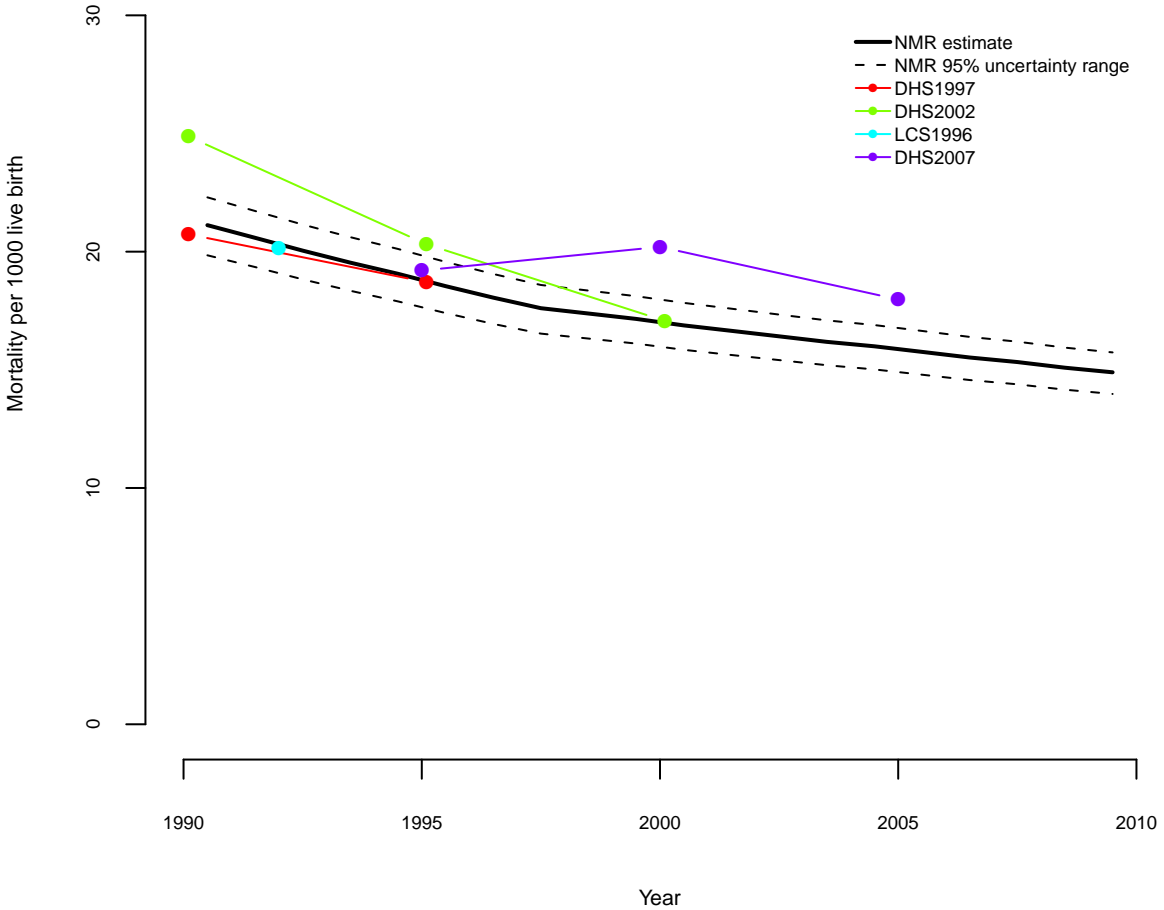

### Jordan NMR and U5MR

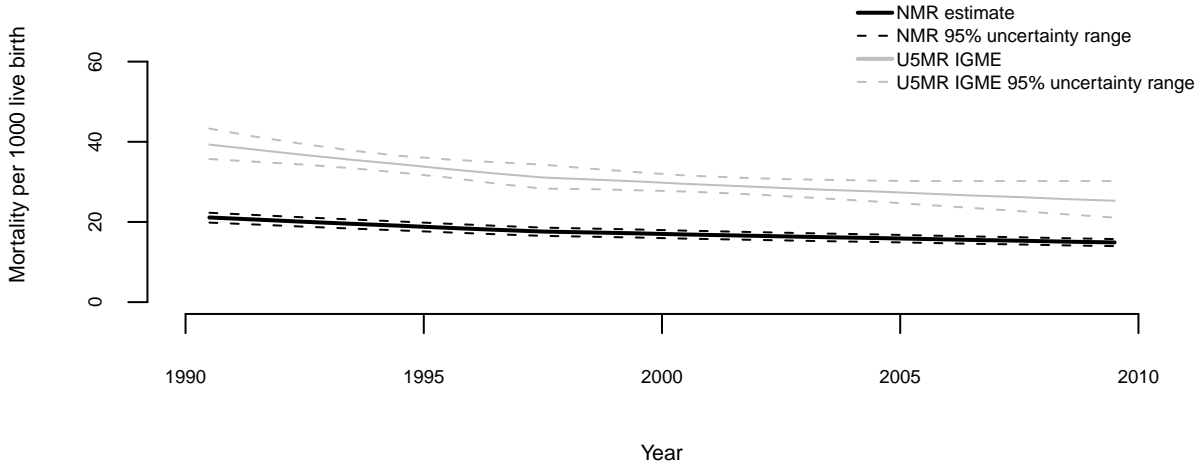

### Jordan NMR as percentage of U5MR

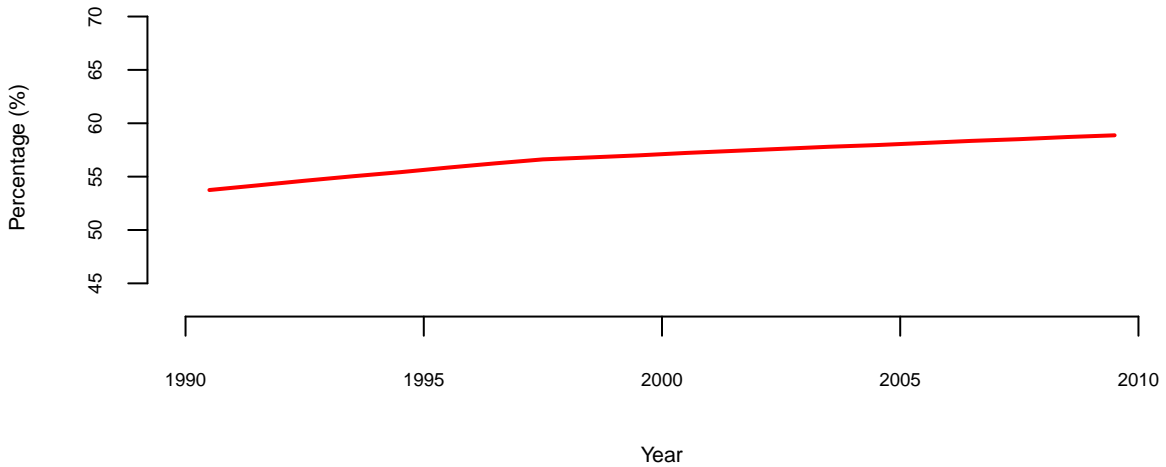

### Kazakhstan Data, and estimated NMR

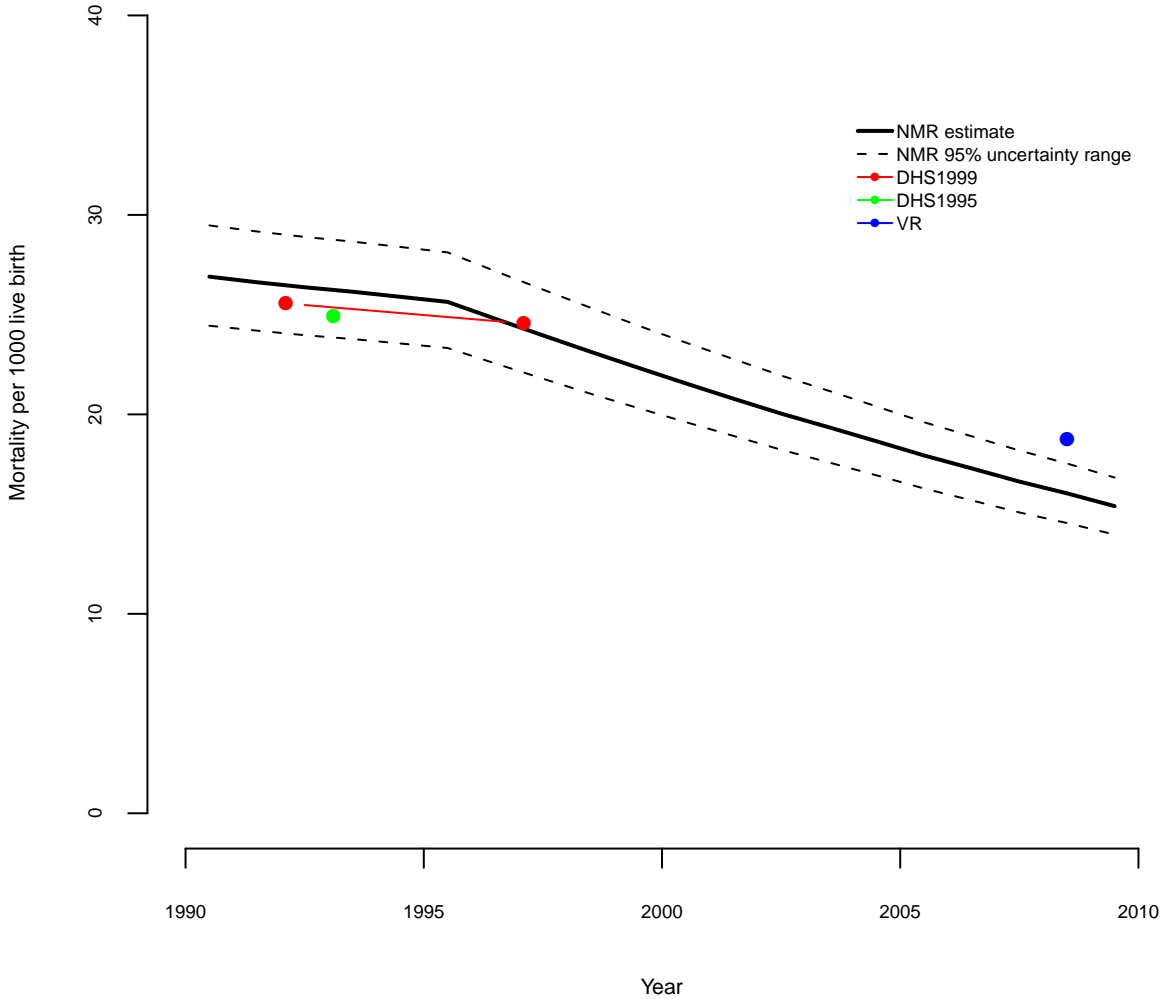

### Kazakhstan NMR and U5MR

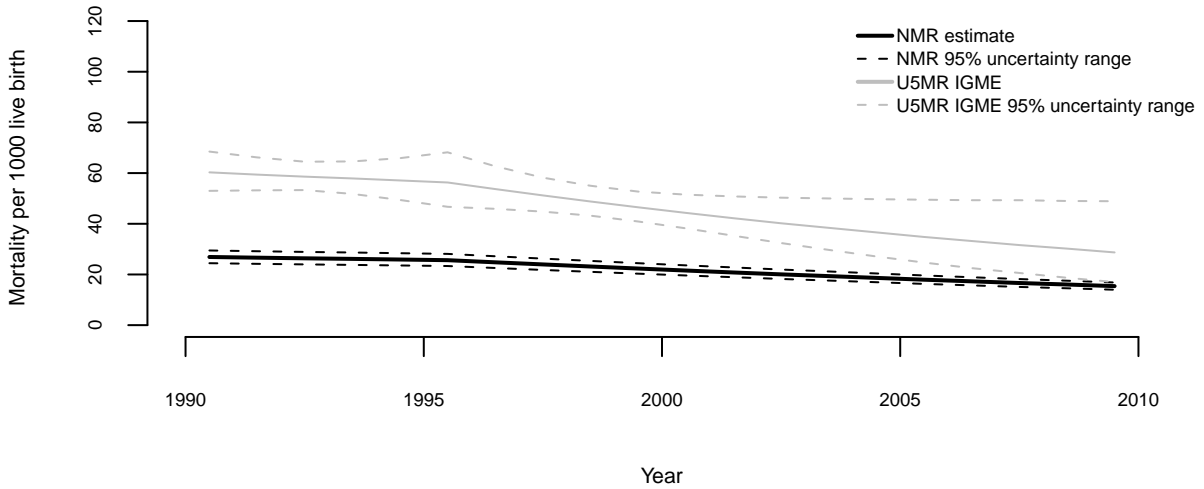

### Kazakhstan NMR as percentage of U5MR

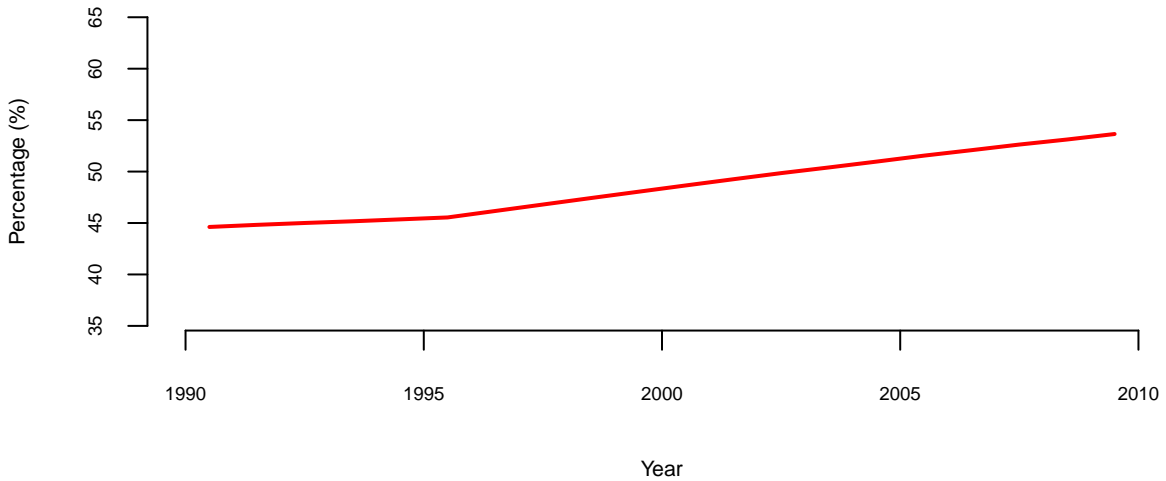



# Kenya Data, and estimated NMR

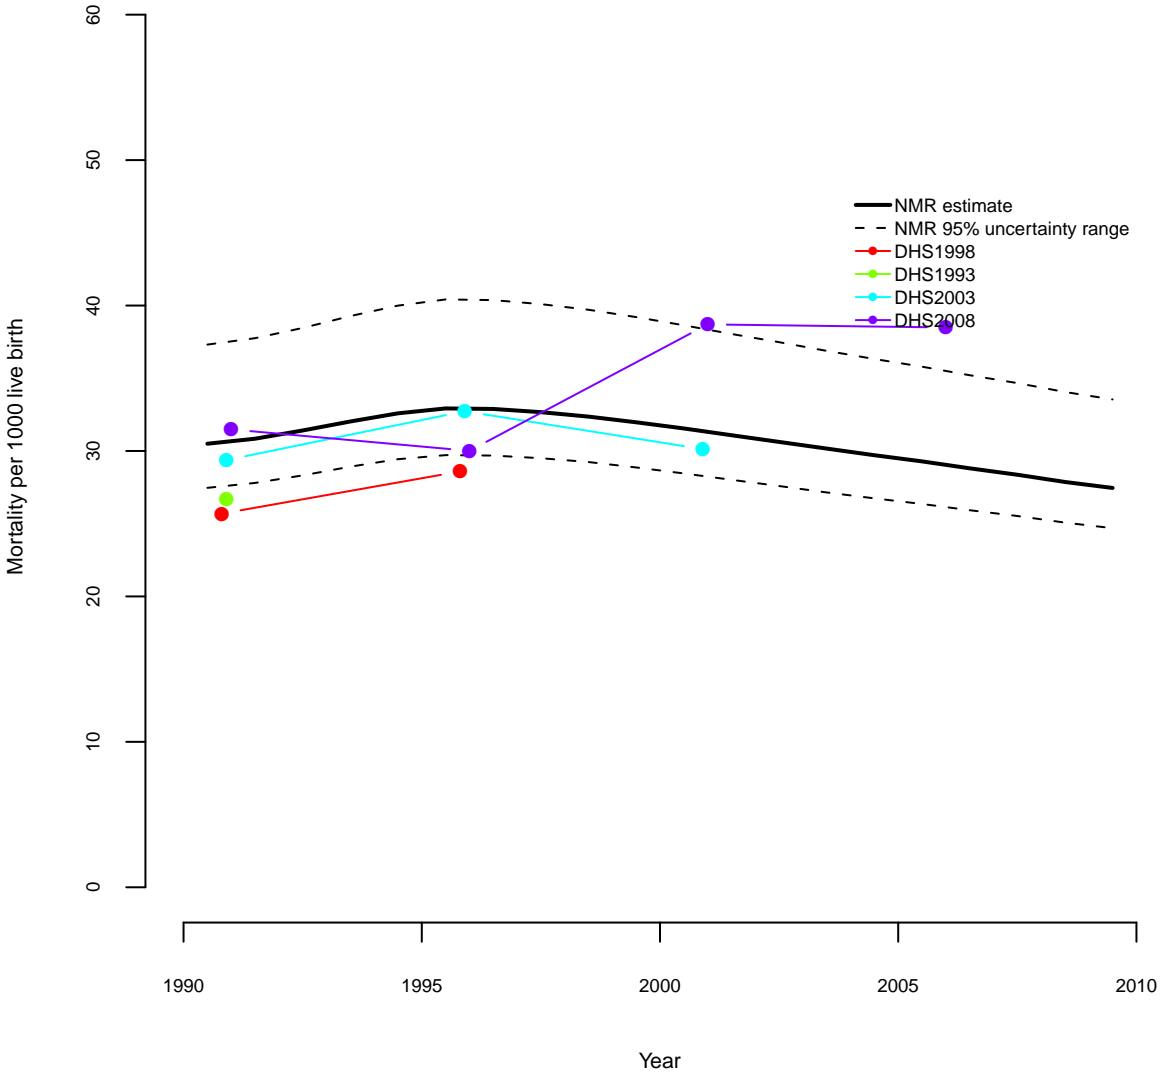

### Kenya NMR and U5MR

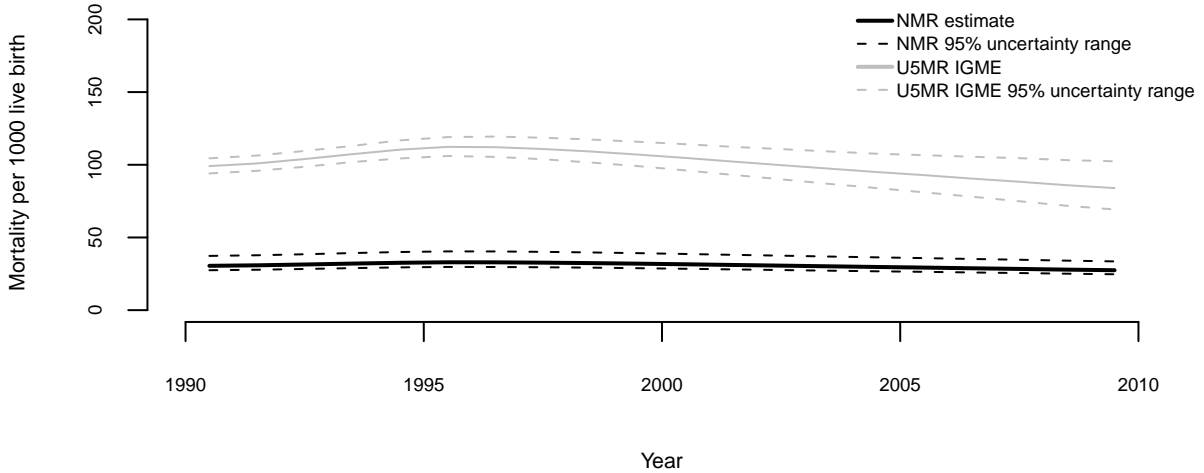

### Kenya NMR as percentage of U5MR

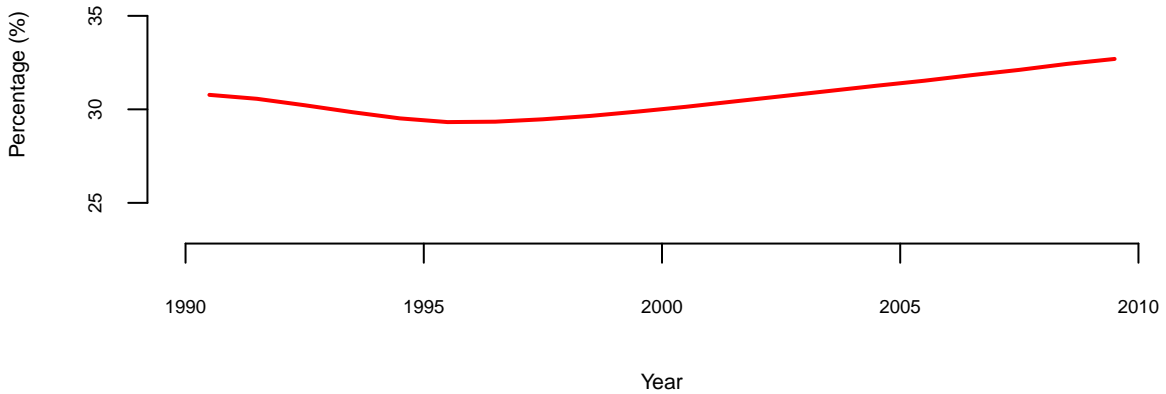

**Kiribati**  
**Data, and estimated NMR**

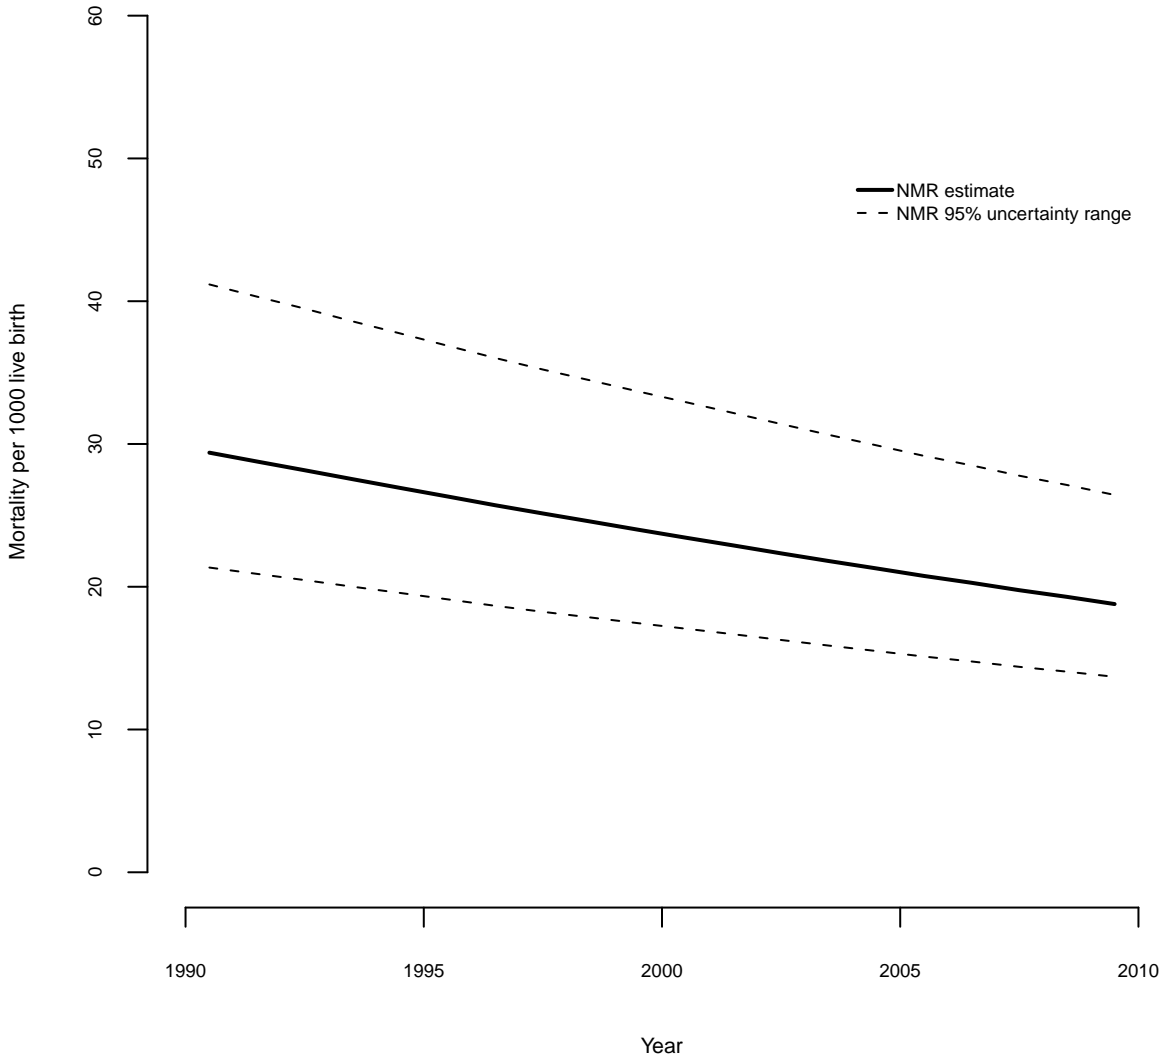

### Kiribati NMR and U5MR

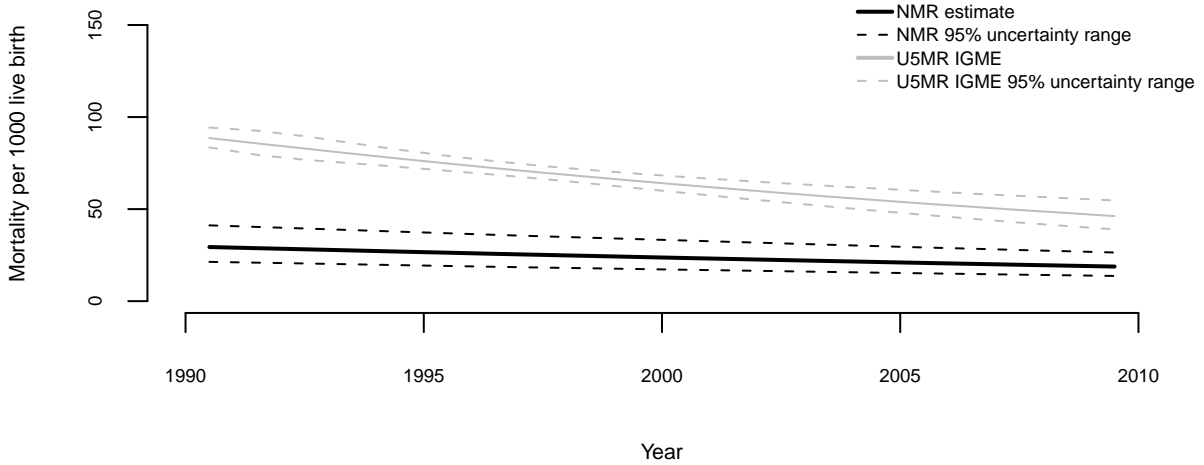

### Kiribati NMR as percentage of U5MR

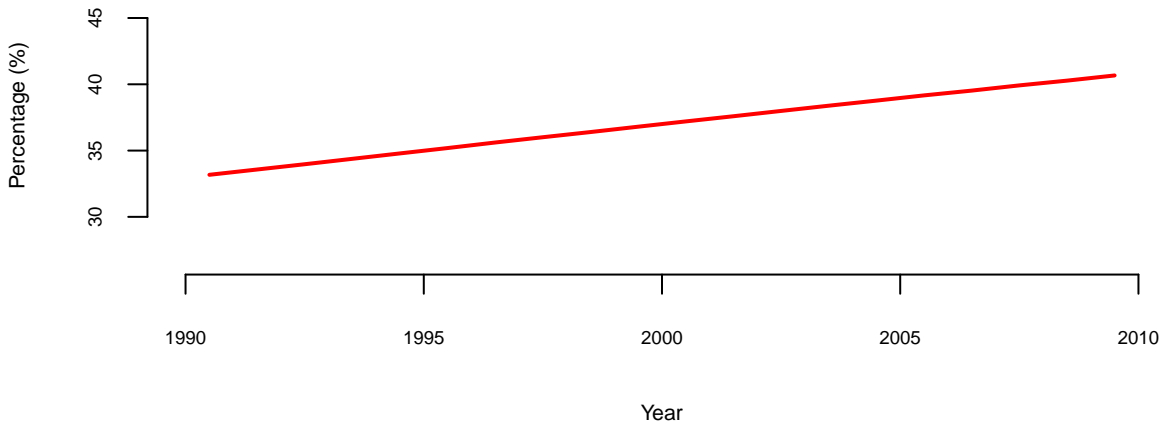

### Kuwait Data, and estimated NMR

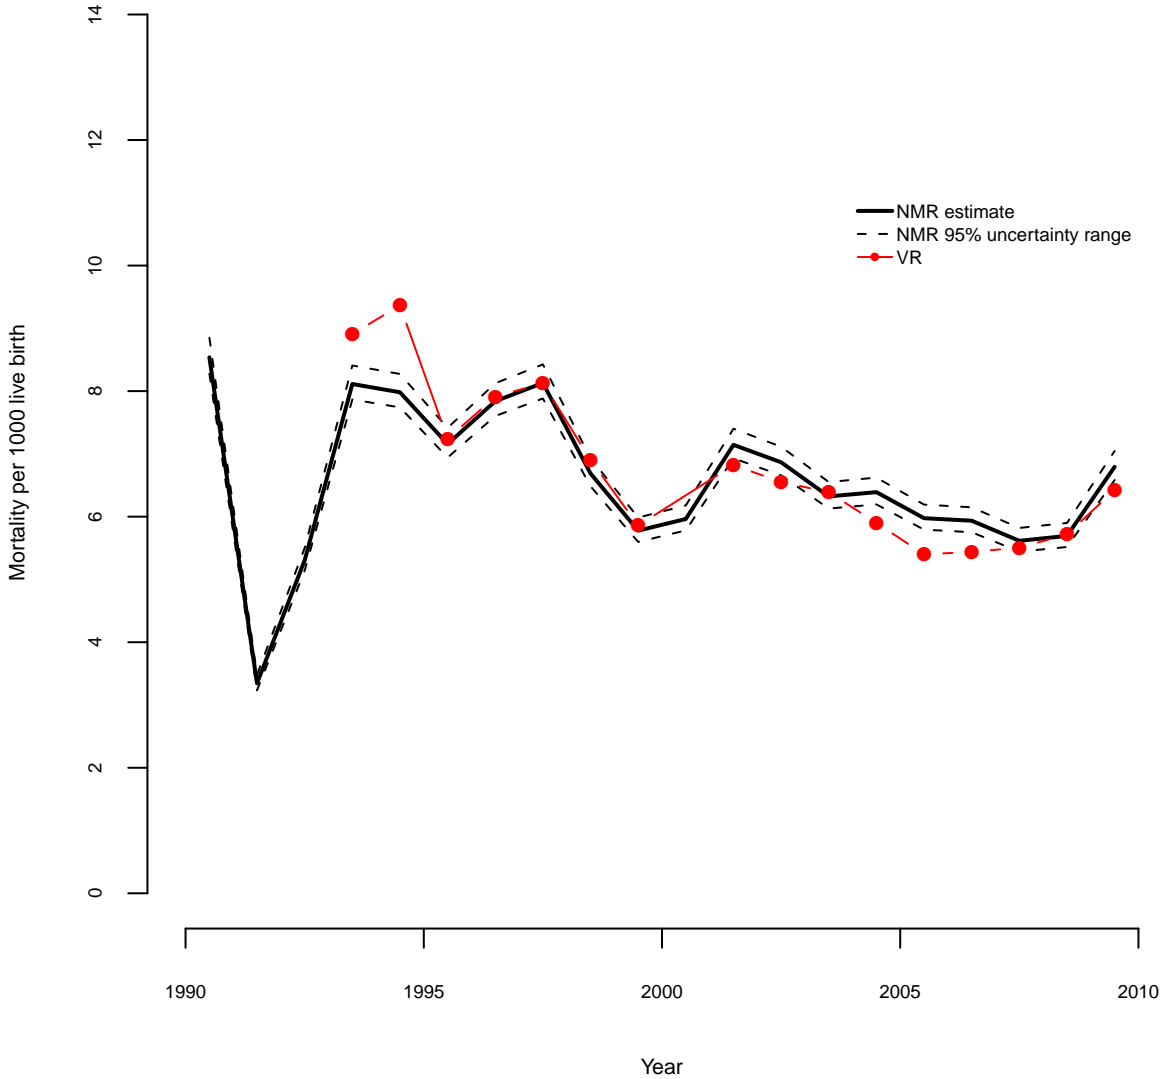

### Kuwait NMR and U5MR

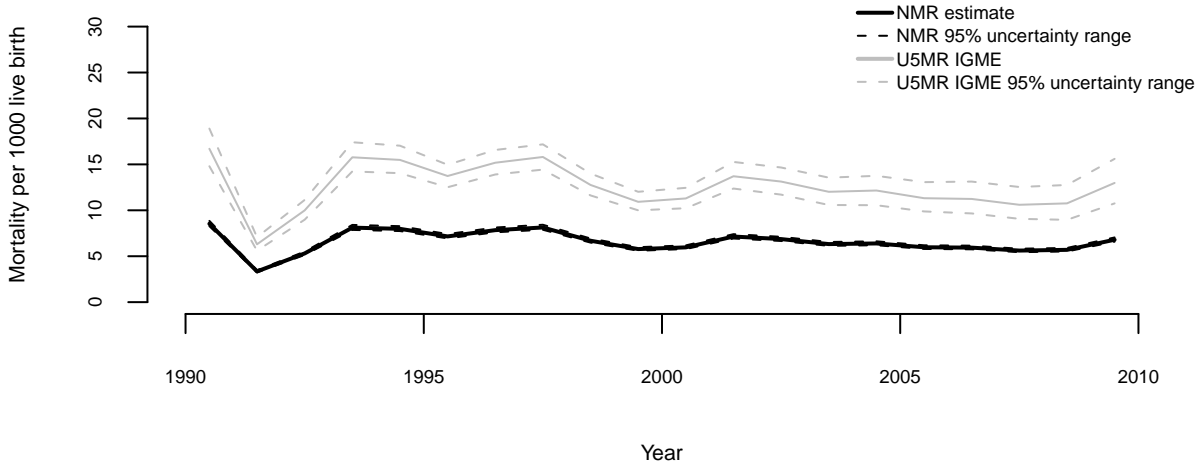

### Kuwait NMR as percentage of U5MR

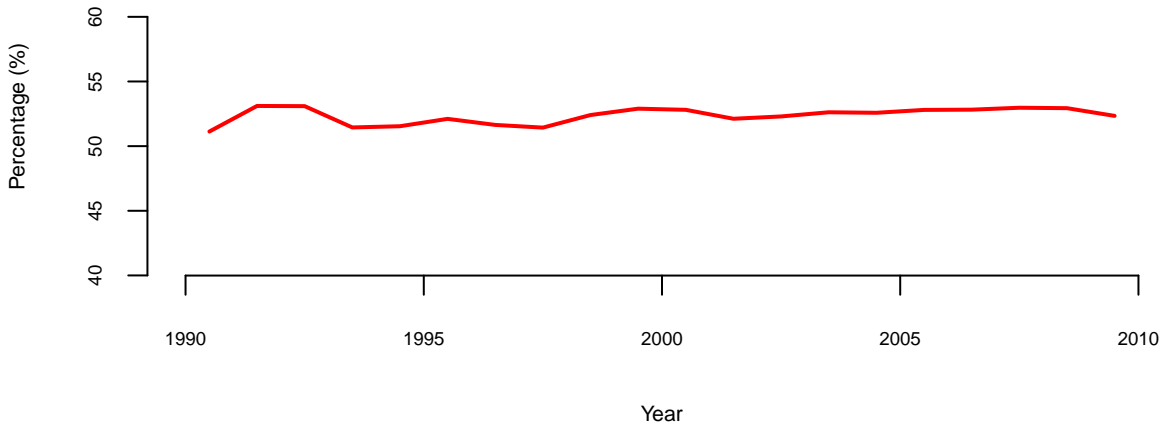

# Kyrgyzstan Data, and estimated NMR

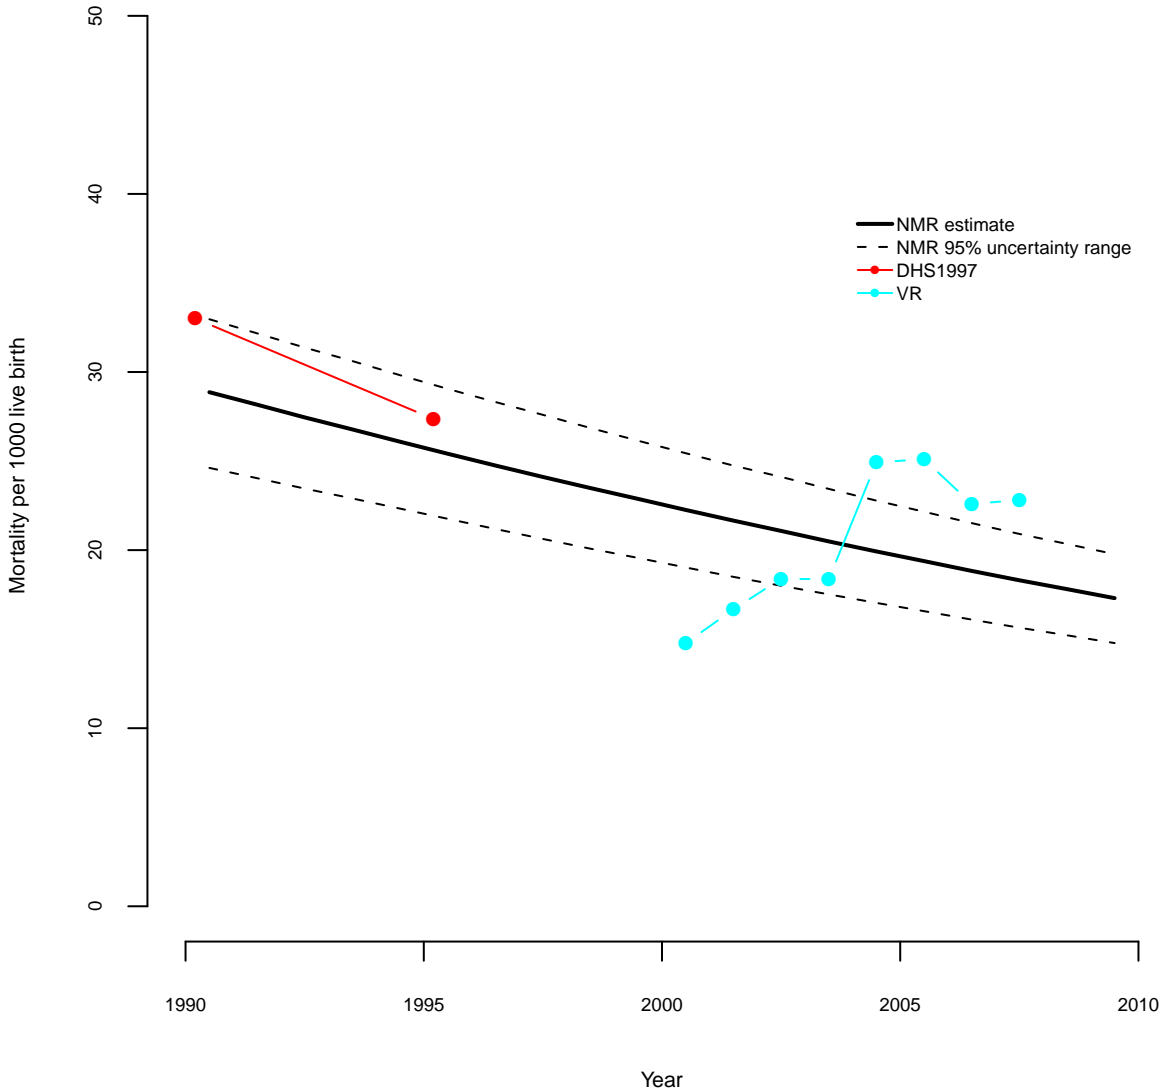

### Kyrgyzstan NMR and U5MR

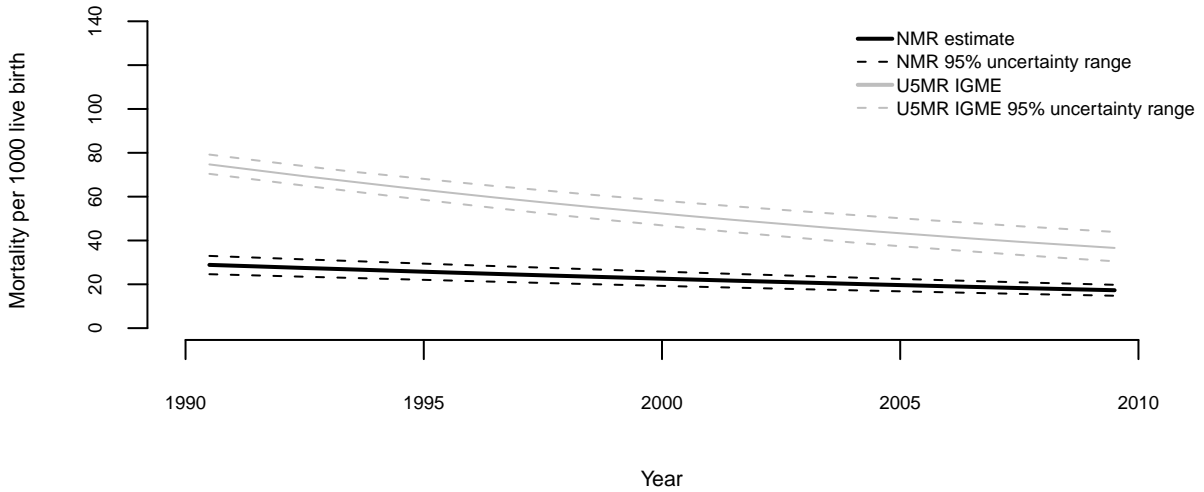

### Kyrgyzstan NMR as percentage of U5MR

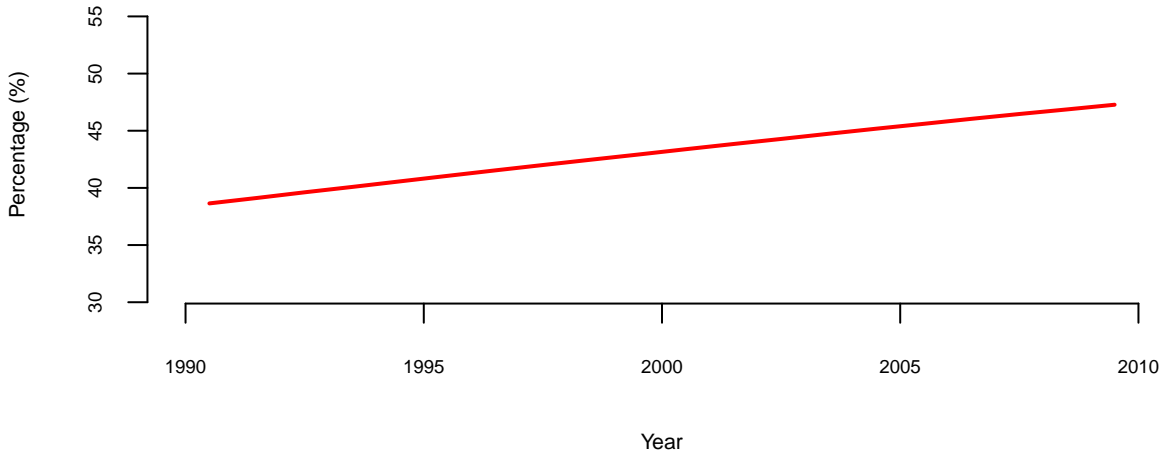



Lao People's Democratic Republic  
Data, and estimated NMR

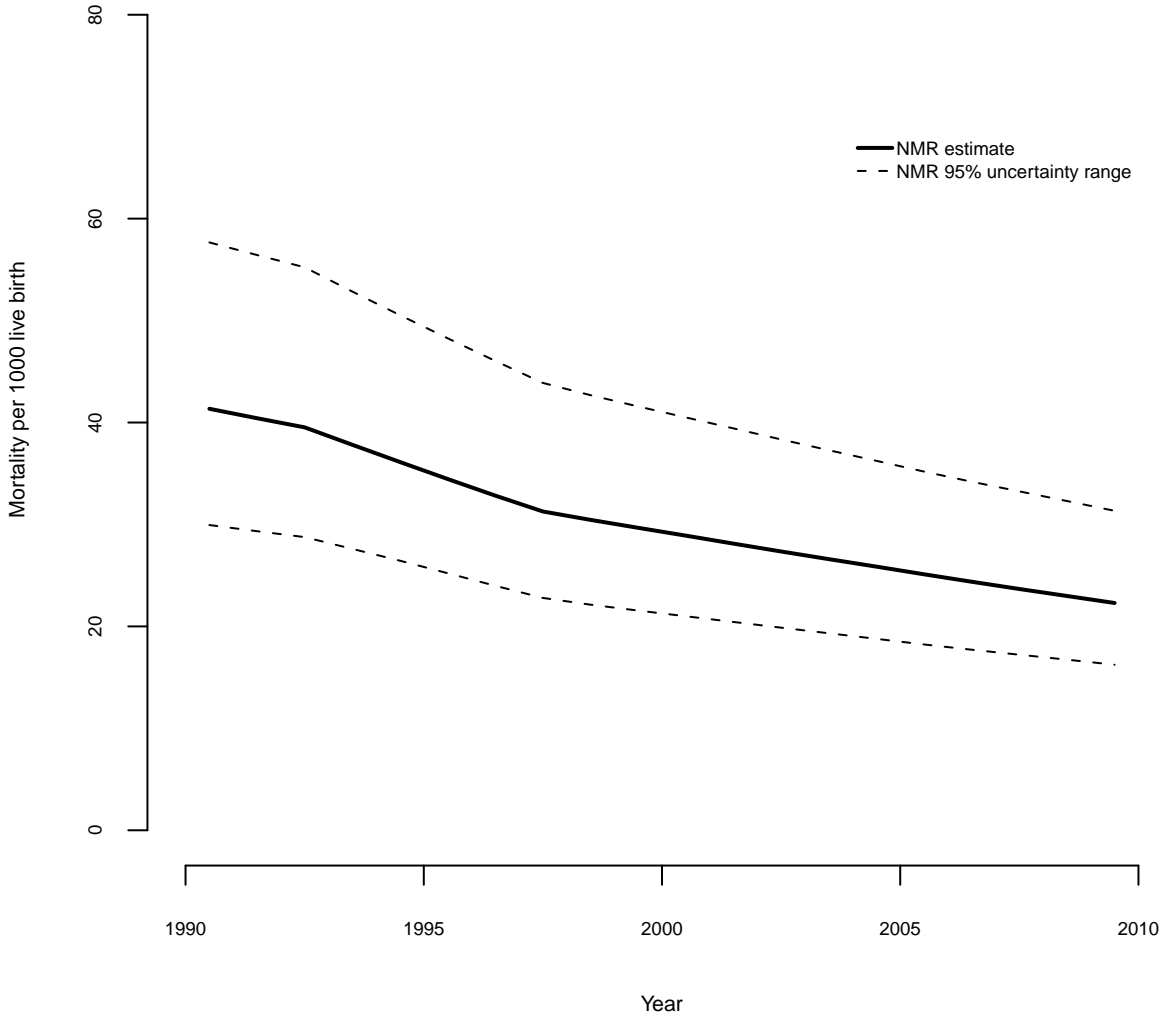

### Lao People's Democratic Republic NMR and U5MR

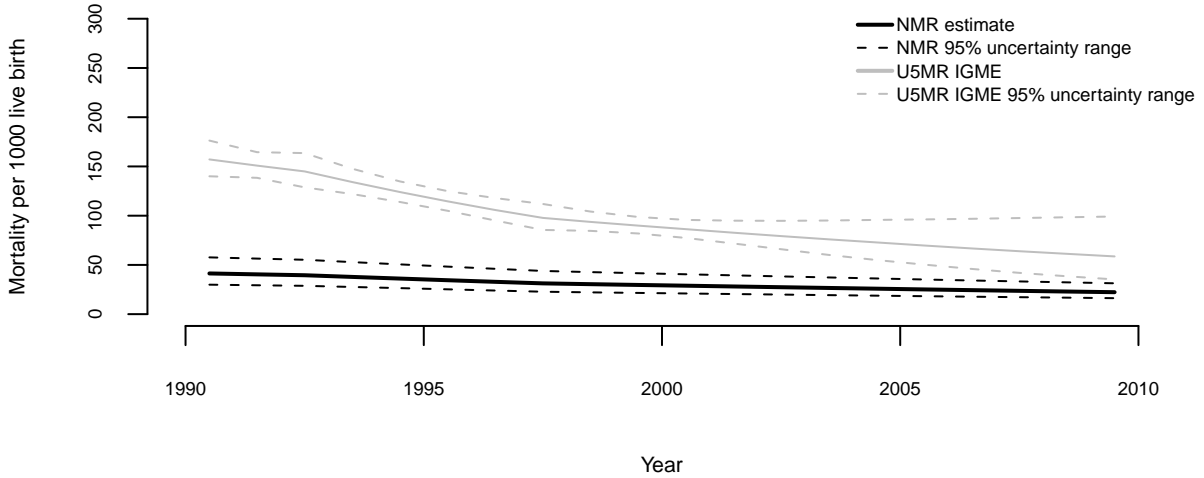

### Lao People's Democratic Republic NMR as percentage of U5MR

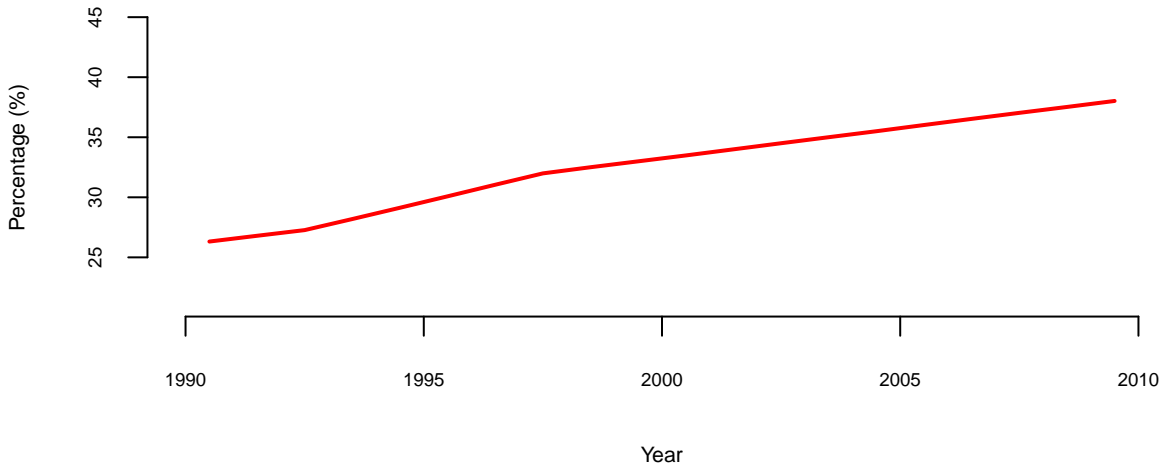

Latvia  
Data, and estimated NMR

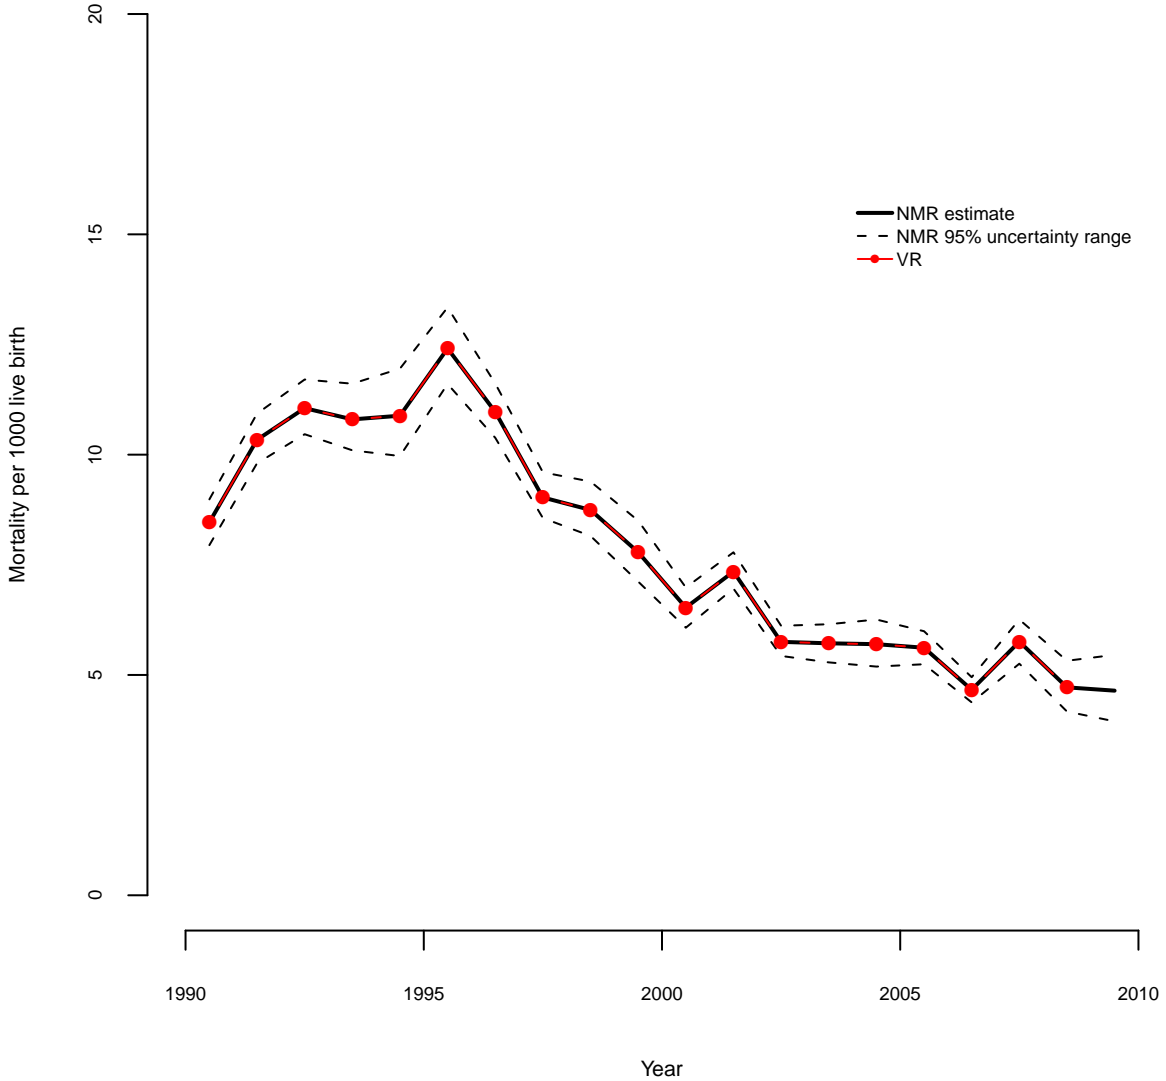

### Latvia NMR and U5MR

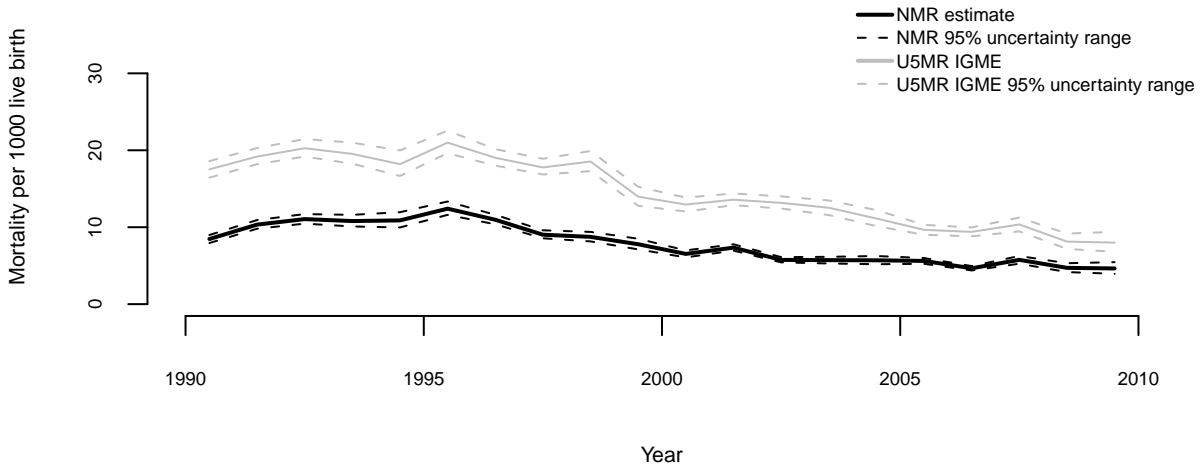

### Latvia NMR as percentage of U5MR

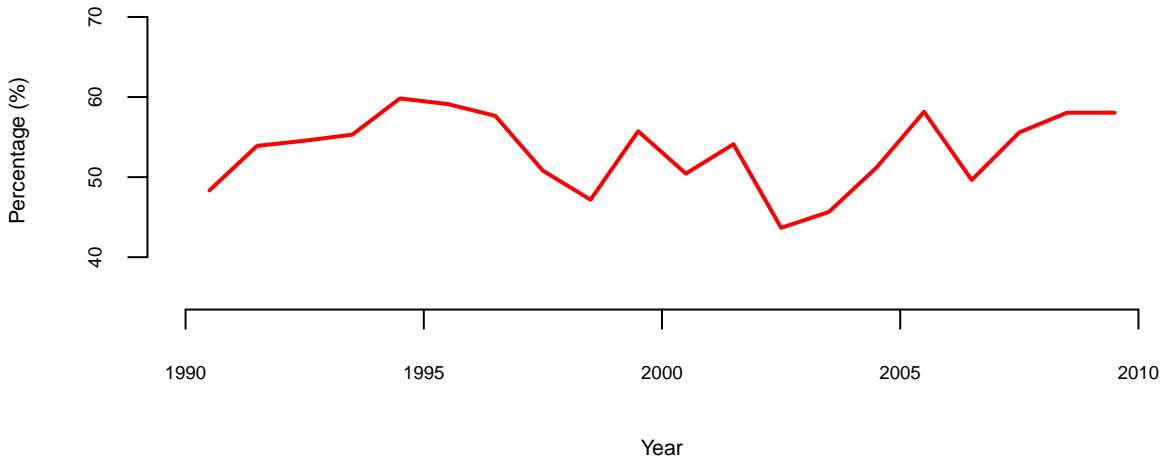

Lebanon  
Data, and estimated NMR

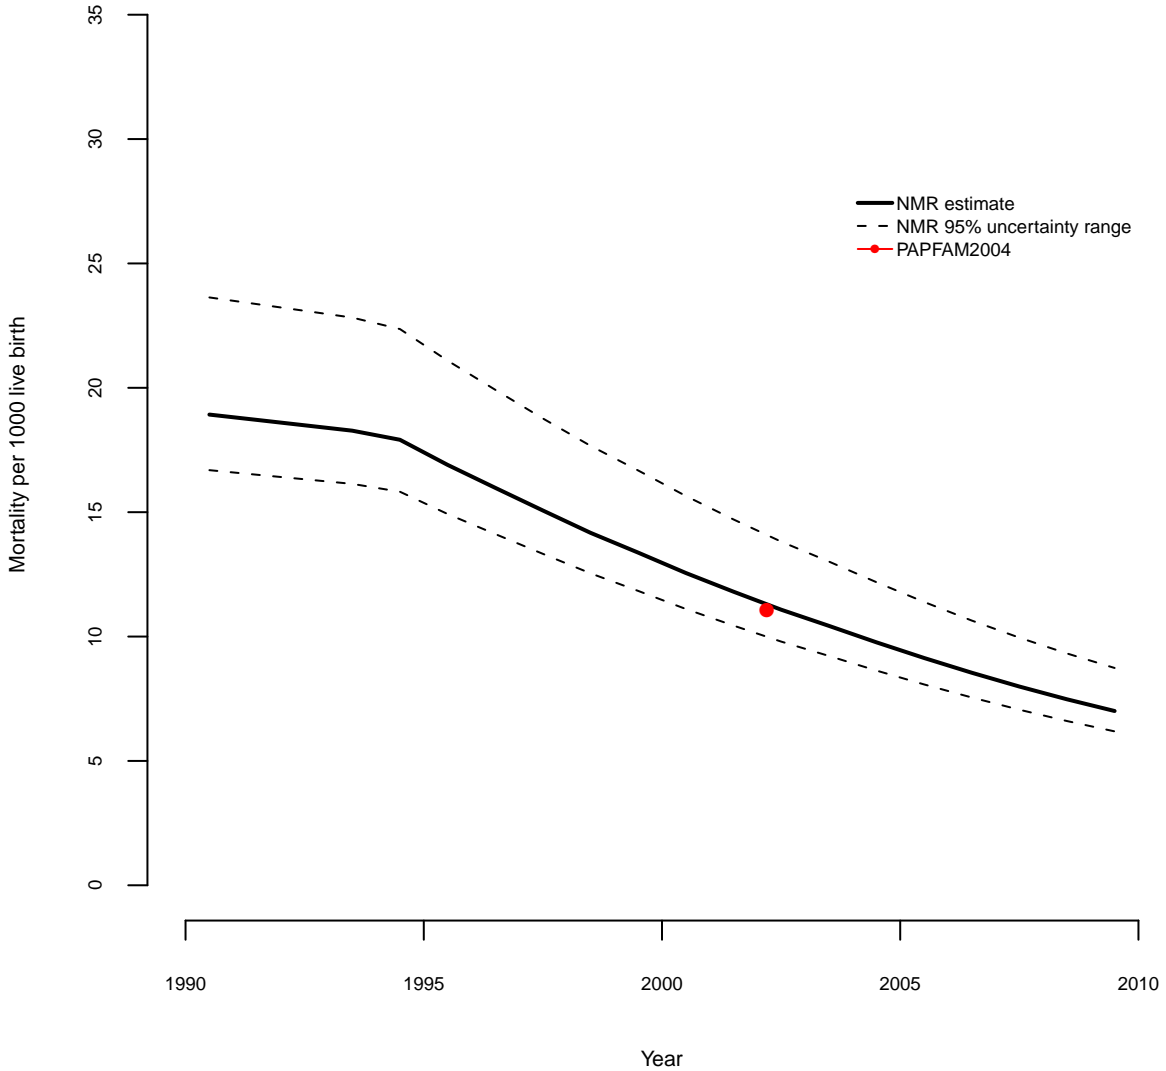

### Lebanon NMR and U5MR

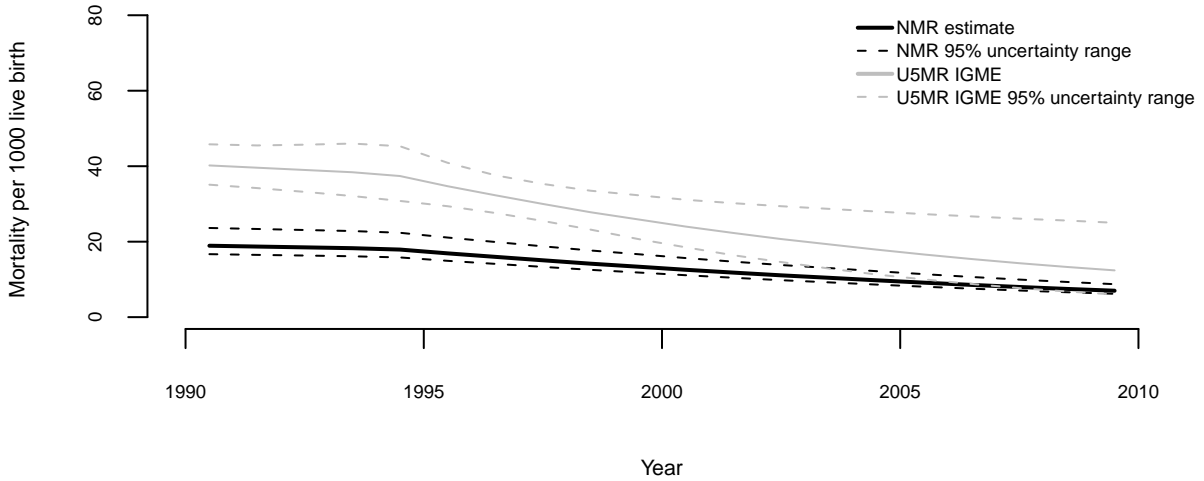

### Lebanon NMR as percentage of U5MR

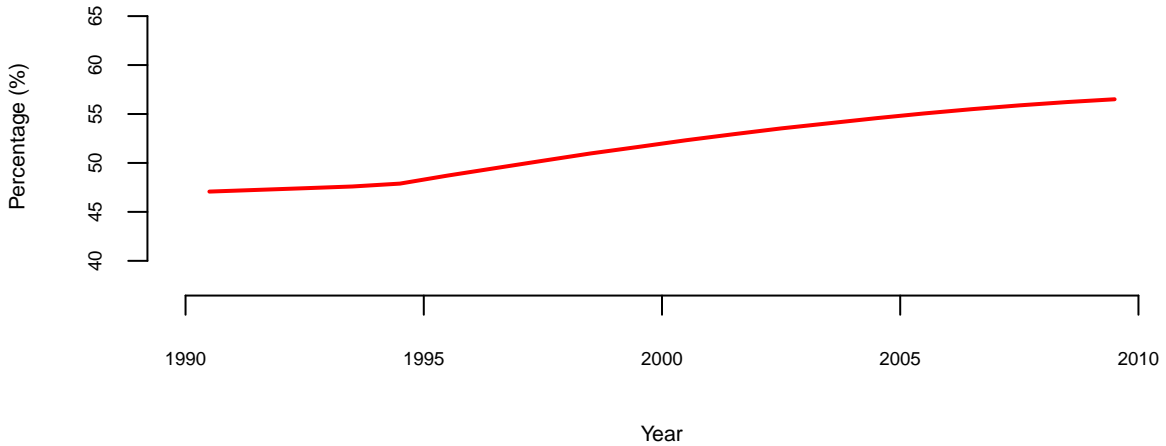

Lesotho  
Data, and estimated NMR

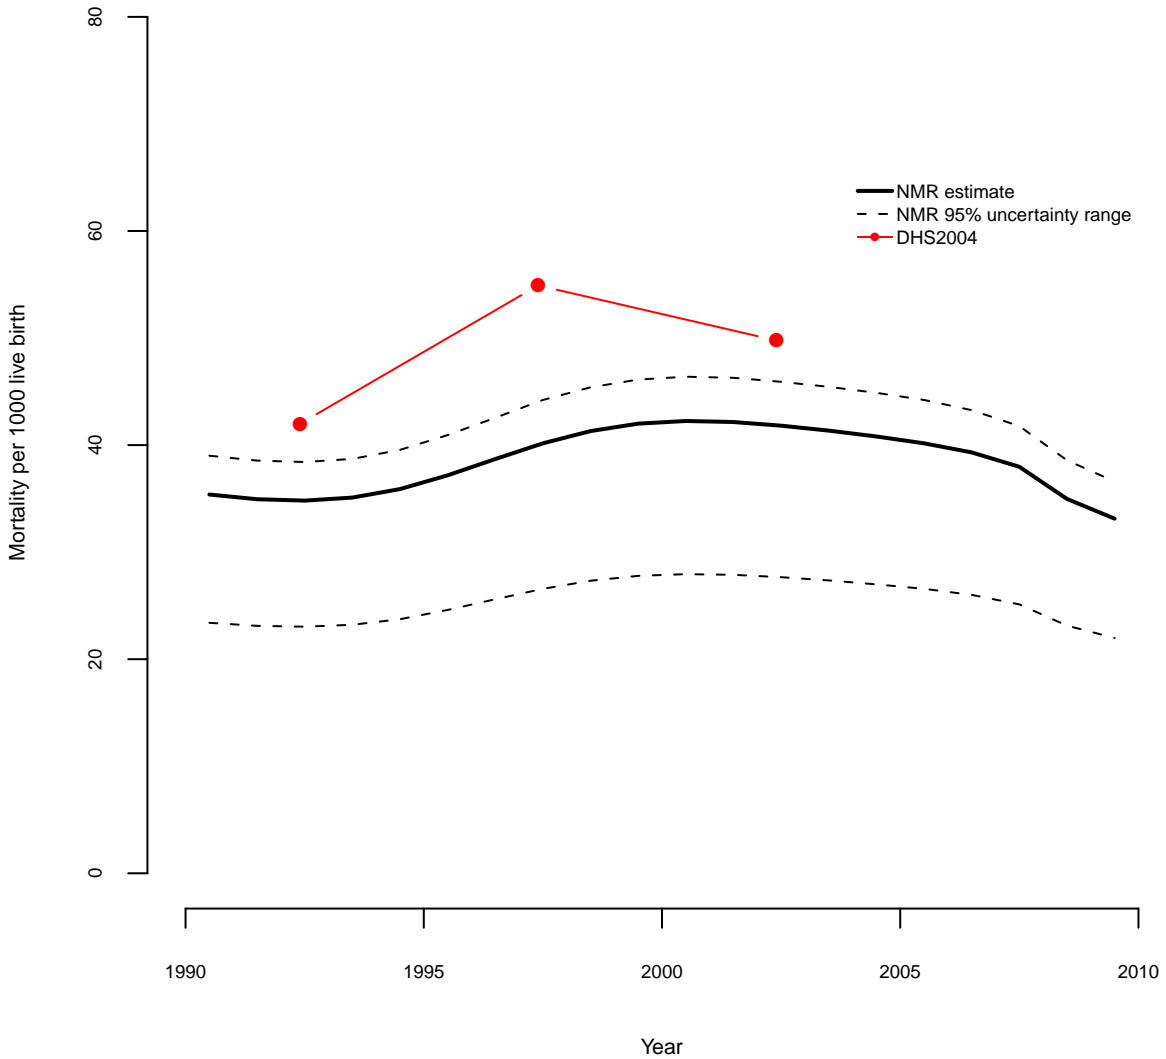

### Lesotho NMR and U5MR

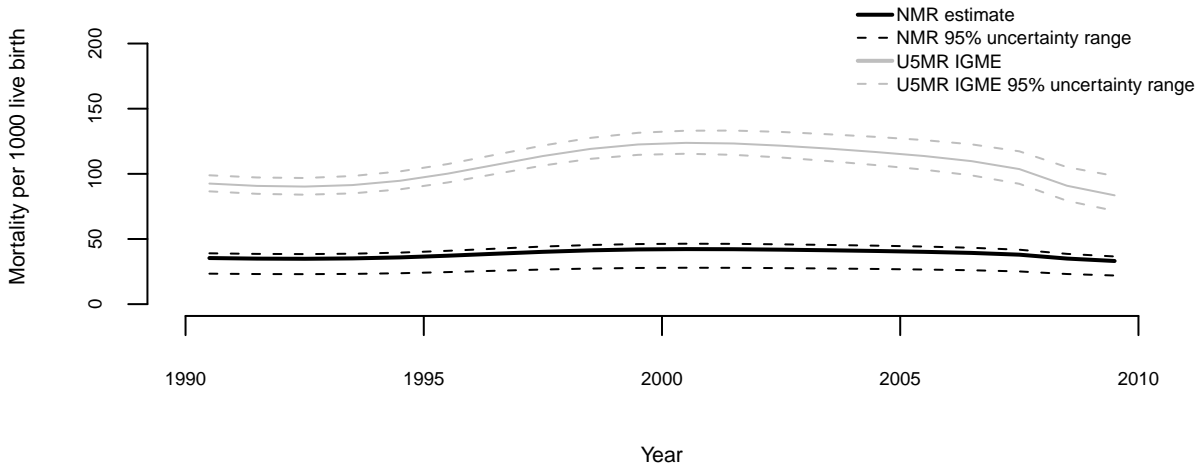

### Lesotho NMR as percentage of U5MR

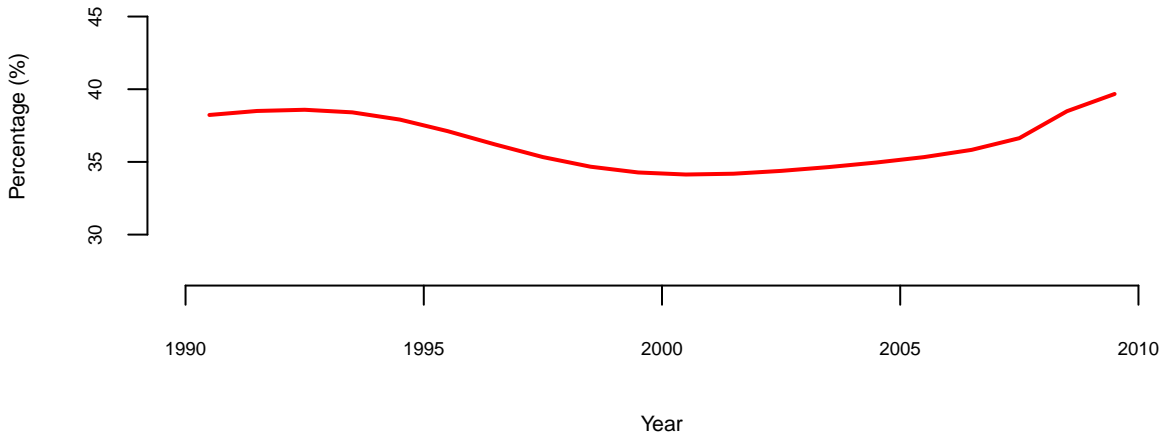



**Liberia**  
**Data, and estimated NMR**

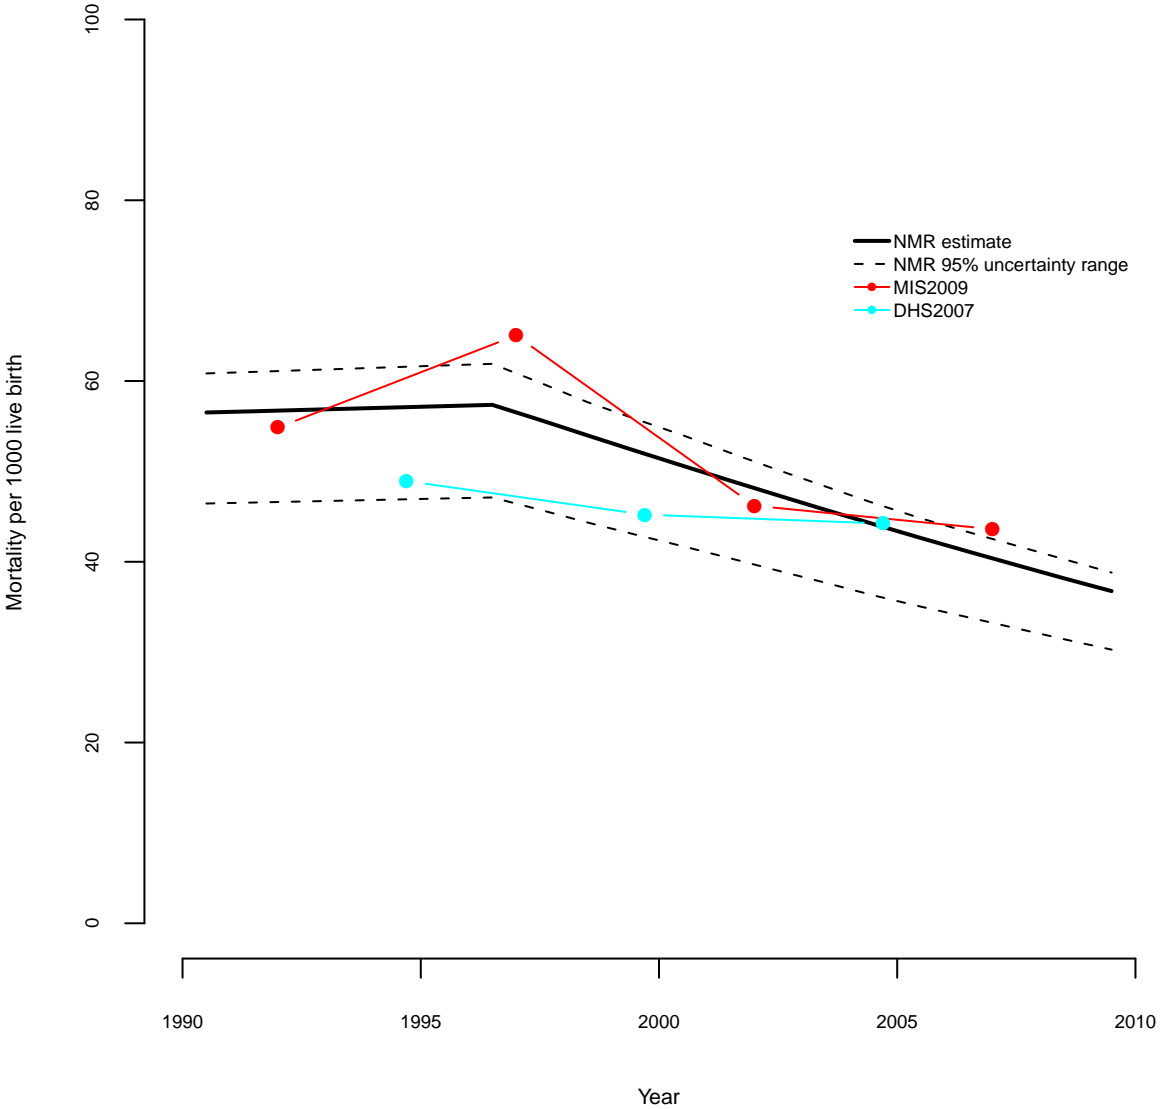

### Liberia NMR and U5MR

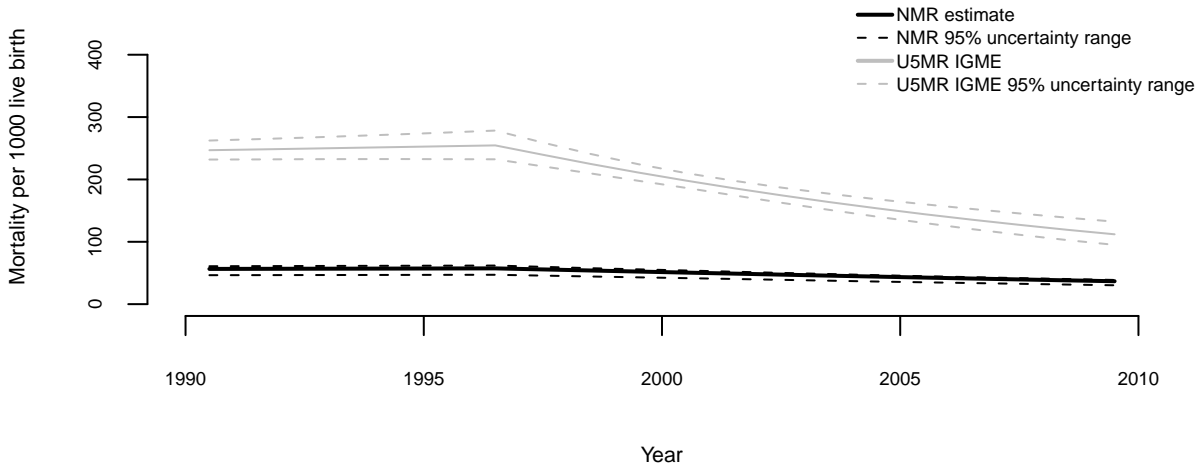

### Liberia NMR as percentage of U5MR

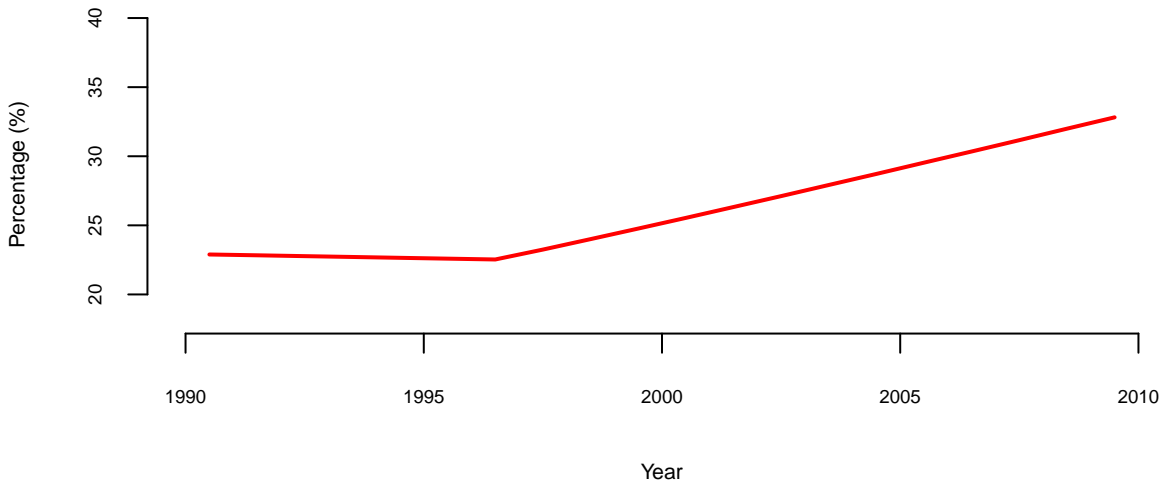

### Libyan Arab Jamahiriya Data, and estimated NMR

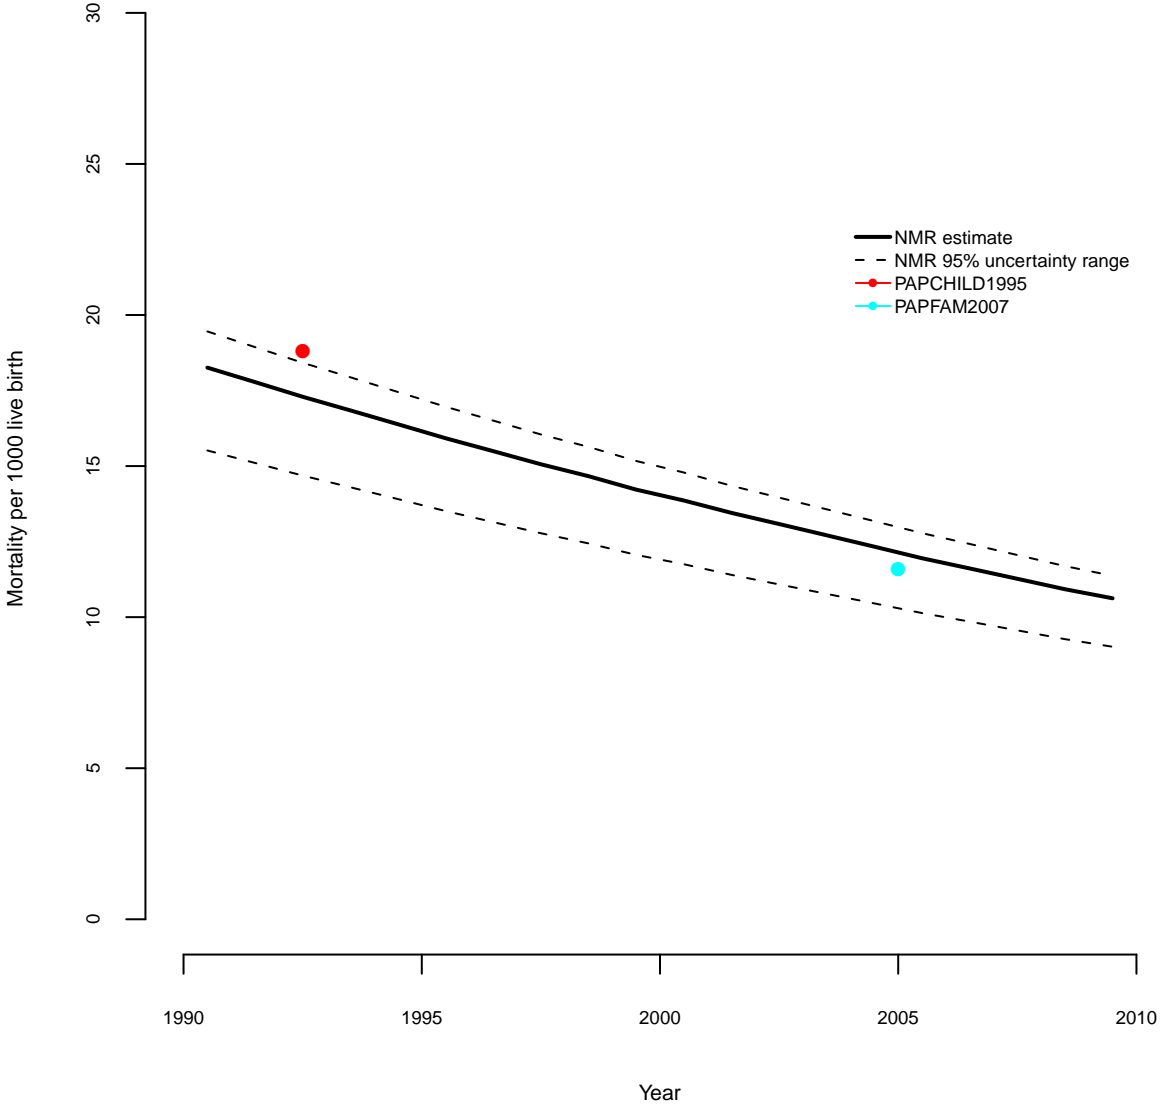

### Libyan Arab Jamahiriya NMR and U5MR

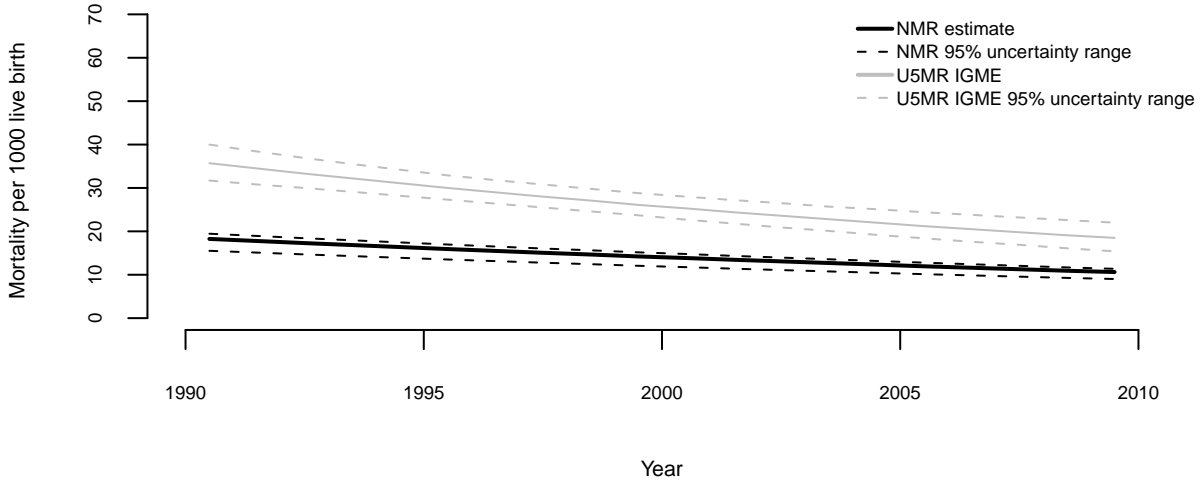

### Libyan Arab Jamahiriya NMR as percentage of U5MR

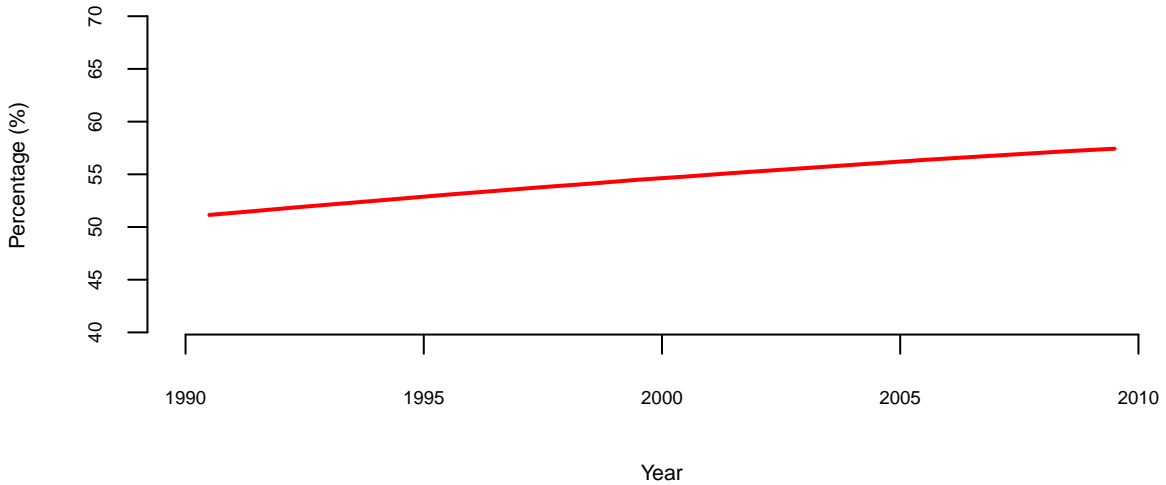

Lithuania  
Data, and estimated NMR

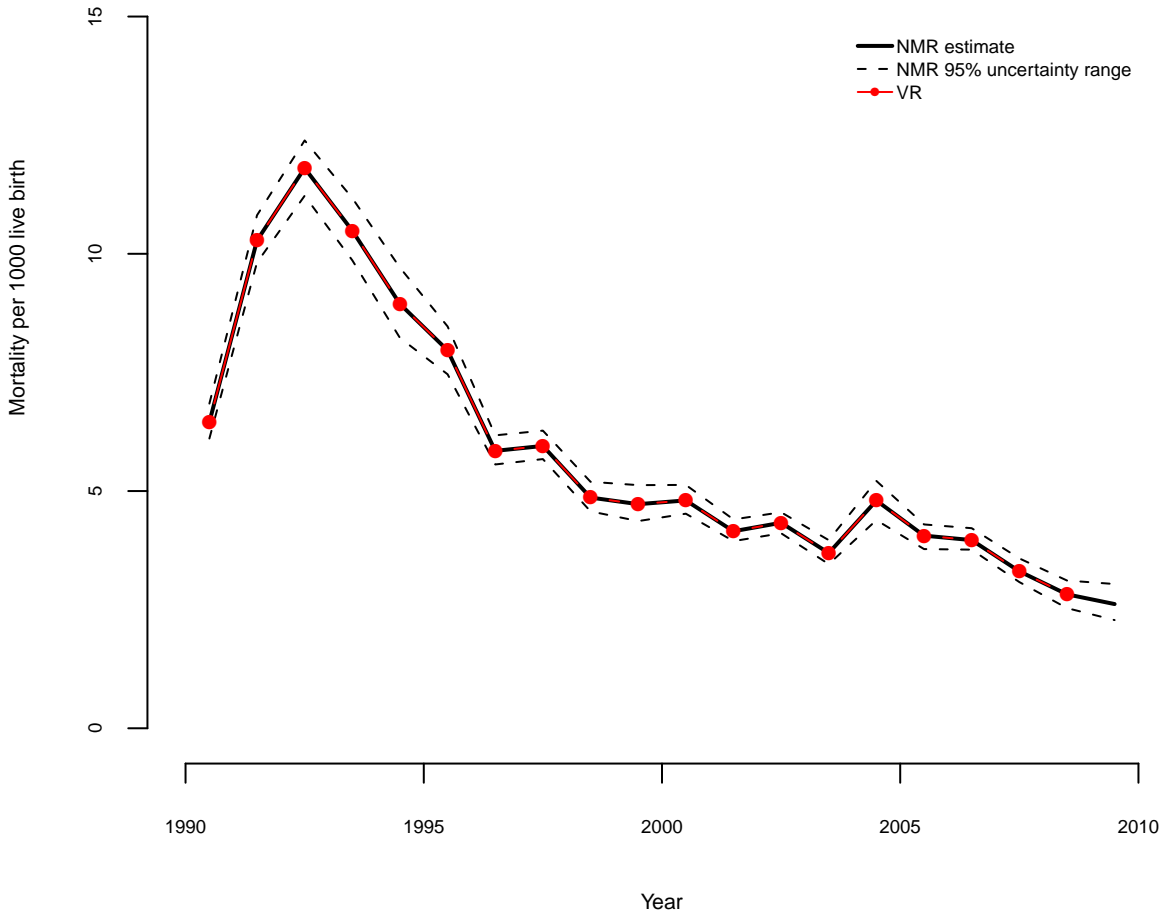

### Lithuania NMR and U5MR

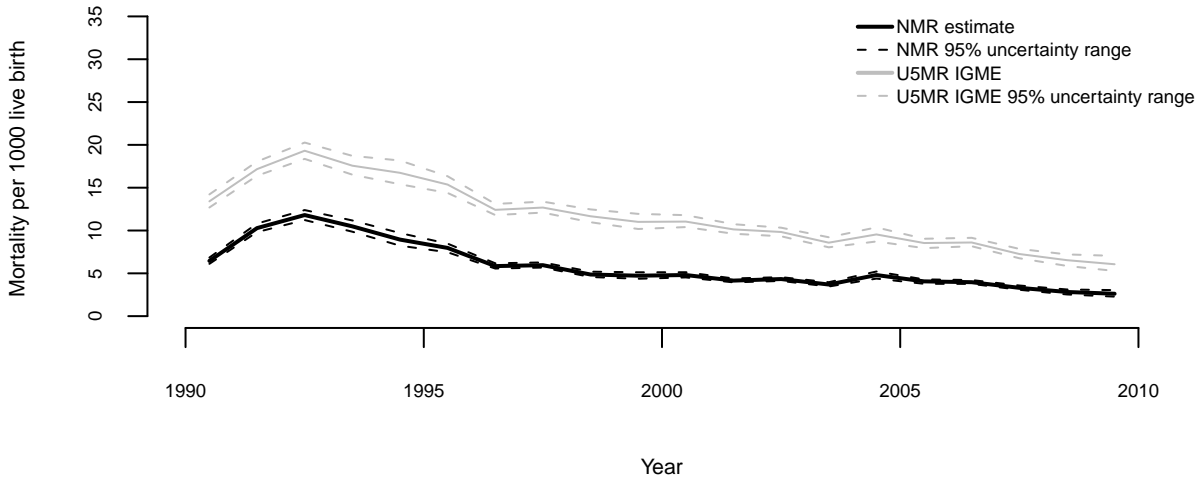

### Lithuania NMR as percentage of U5MR

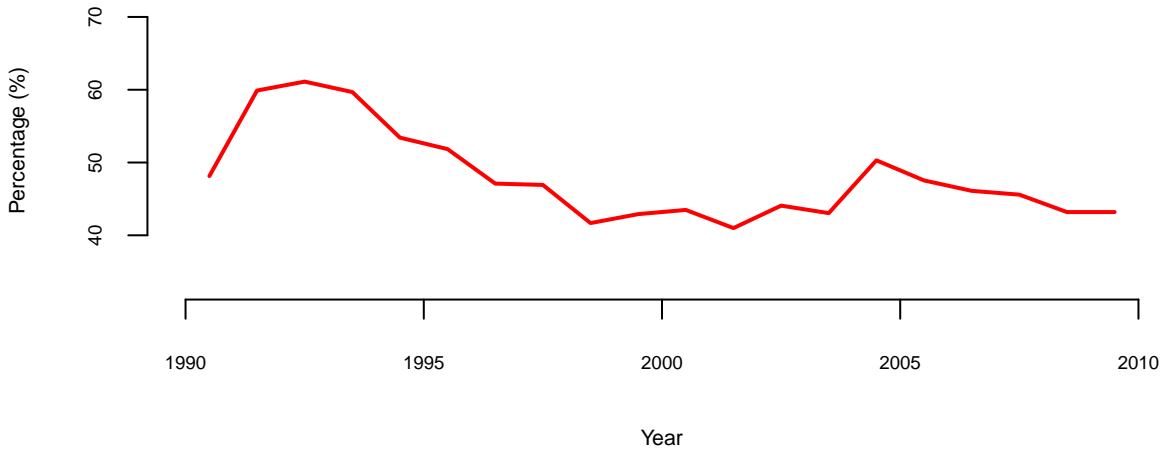

### Luxembourg Data, and estimated NMR

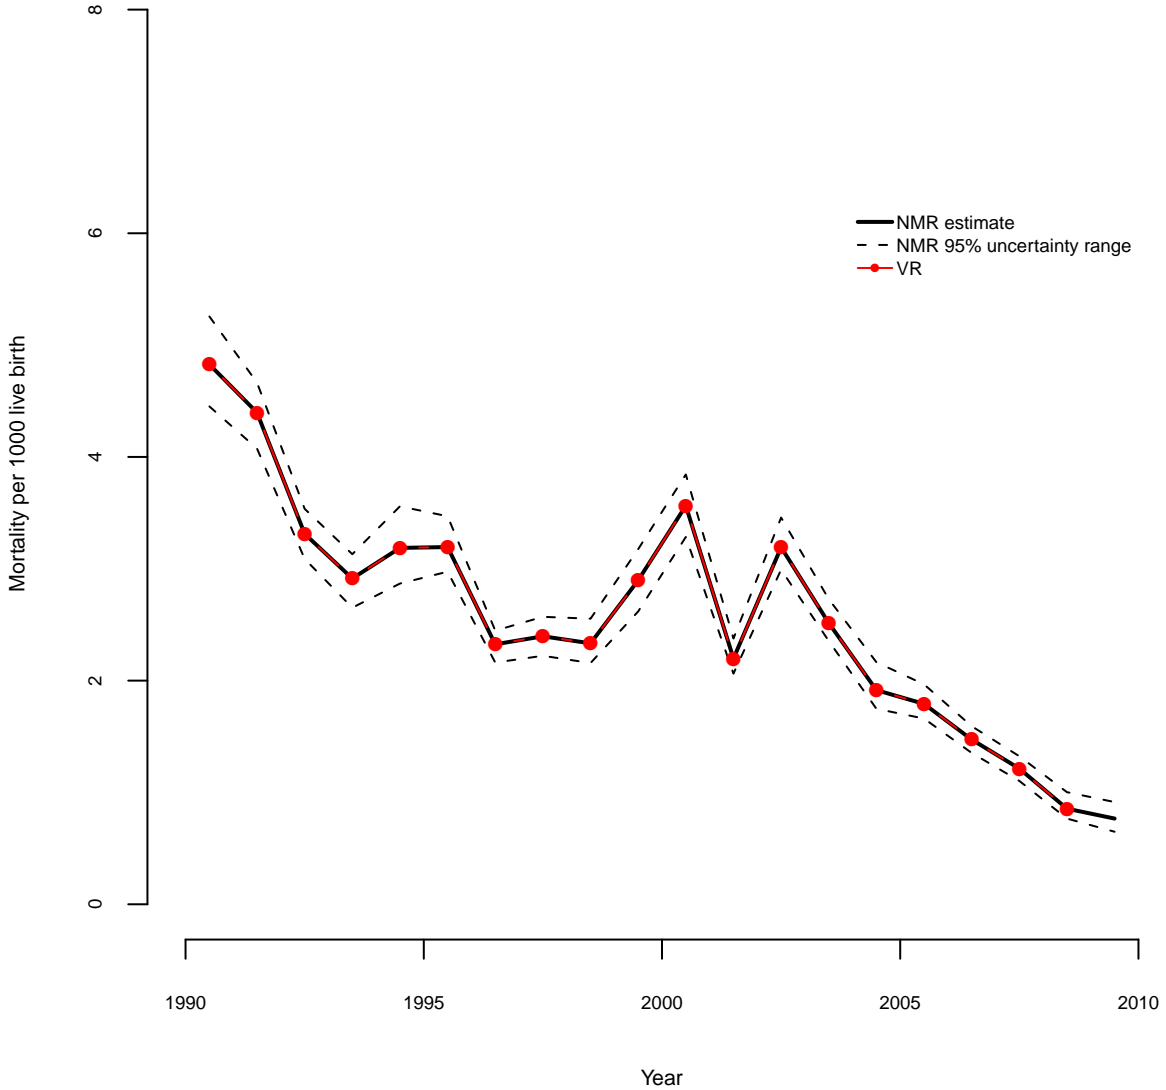

### Luxembourg NMR and U5MR

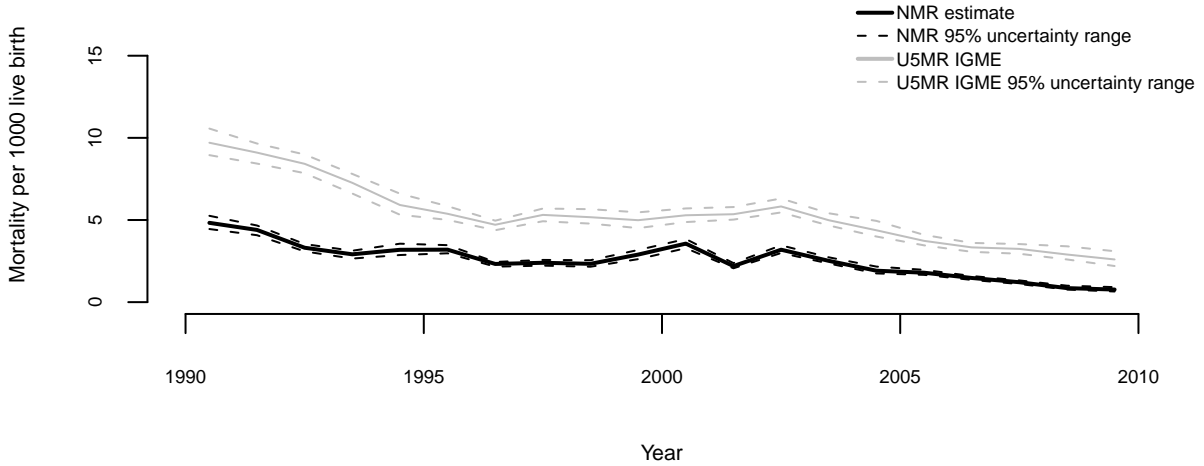

### Luxembourg NMR as percentage of U5MR

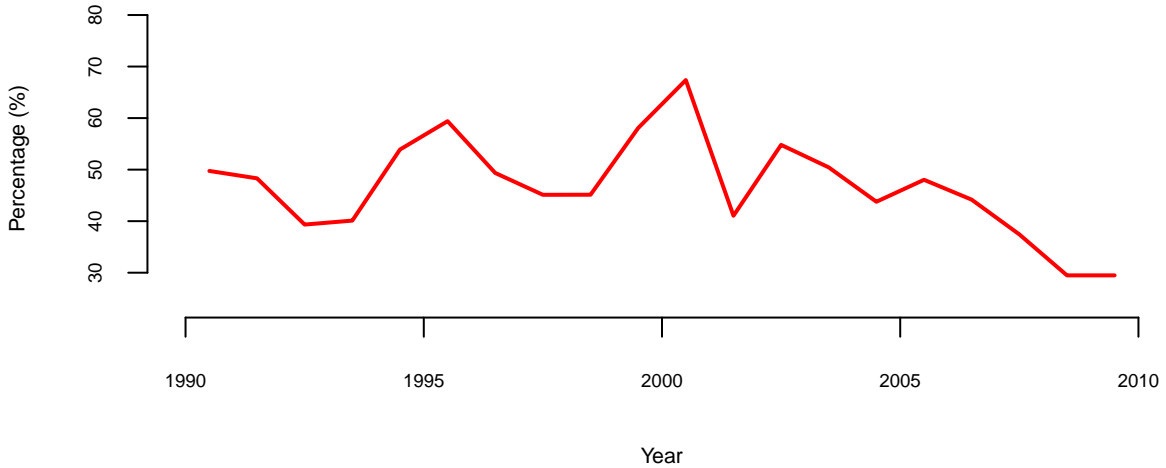



# Madagascar

## Data, and estimated NMR

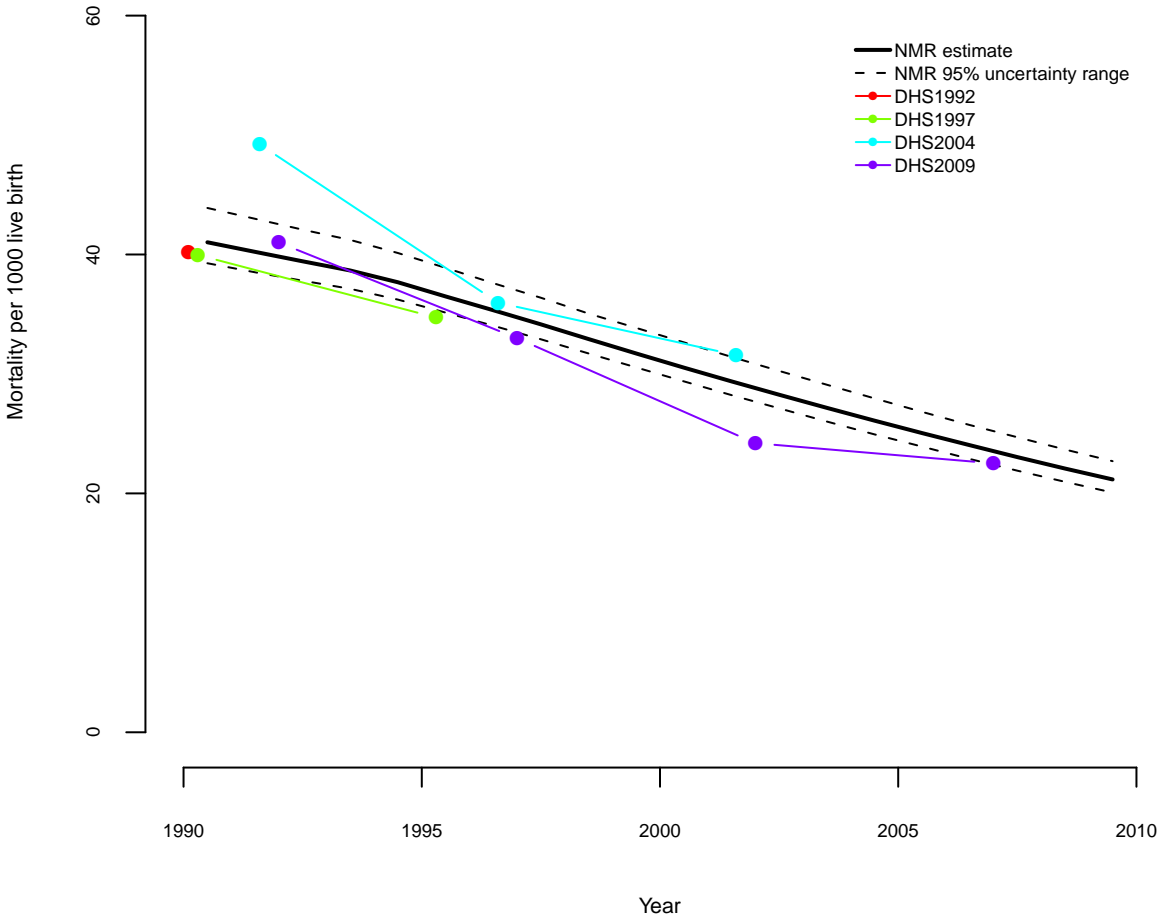

### Madagascar NMR and U5MR

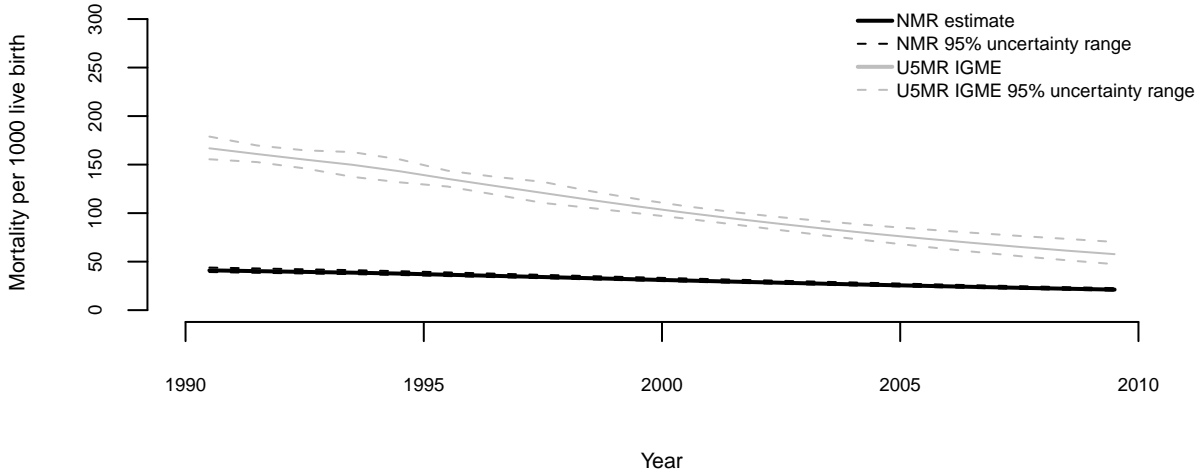

### Madagascar NMR as percentage of U5MR

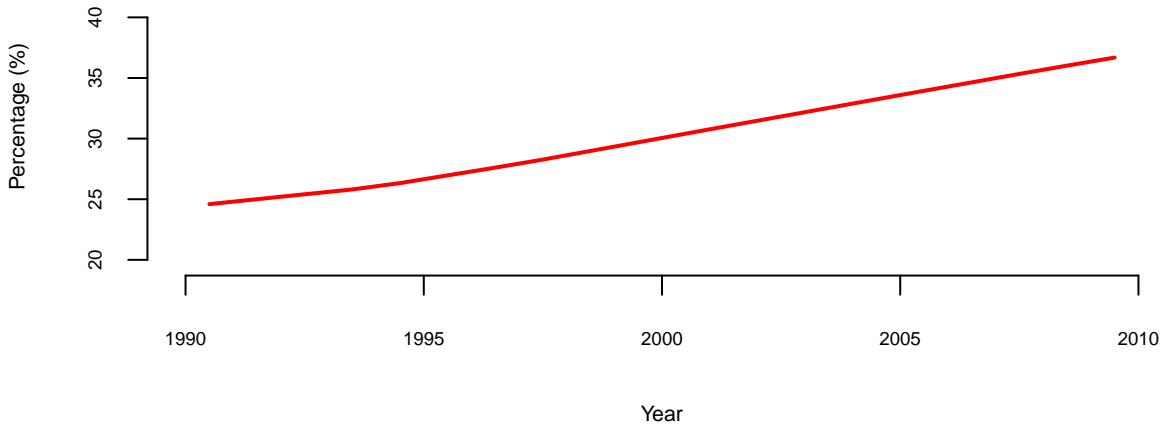

**Malawi**  
**Data, and estimated NMR**

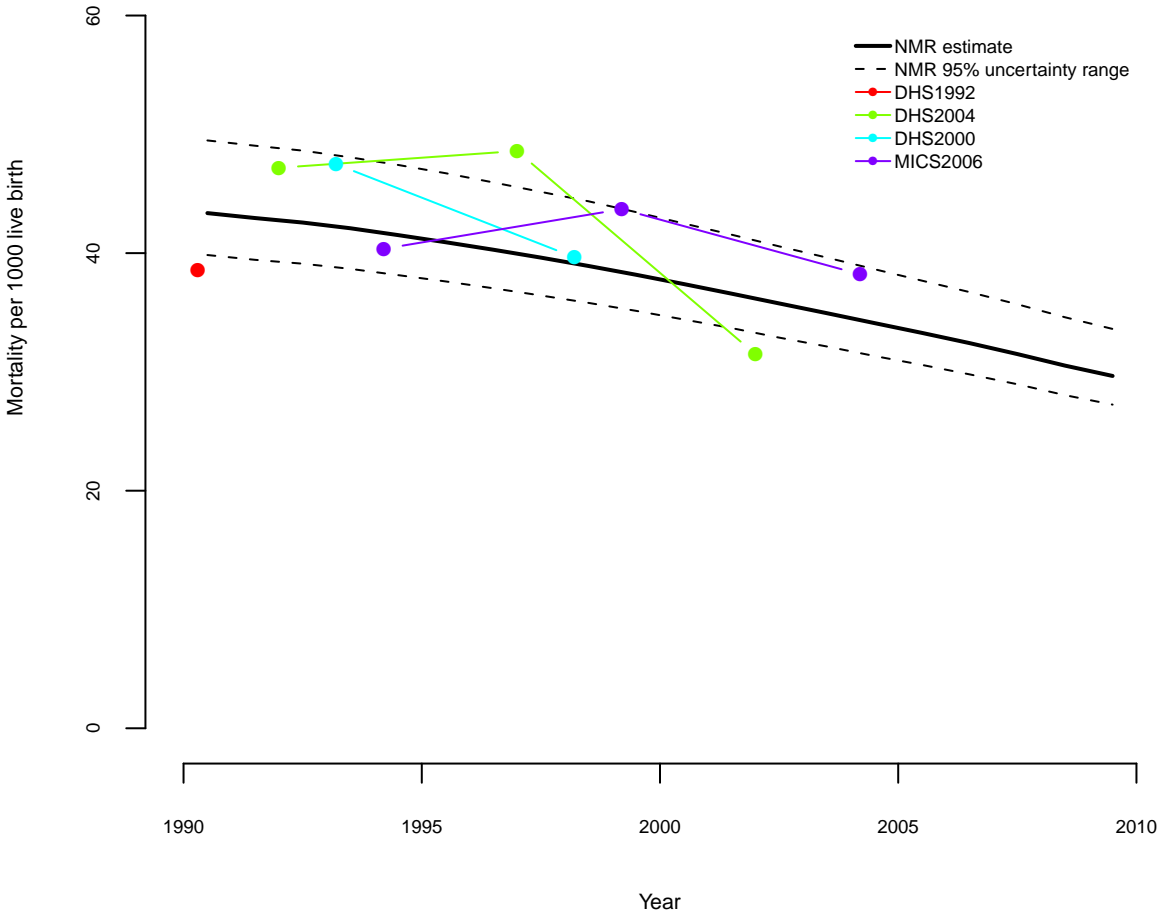

### Malawi NMR and U5MR

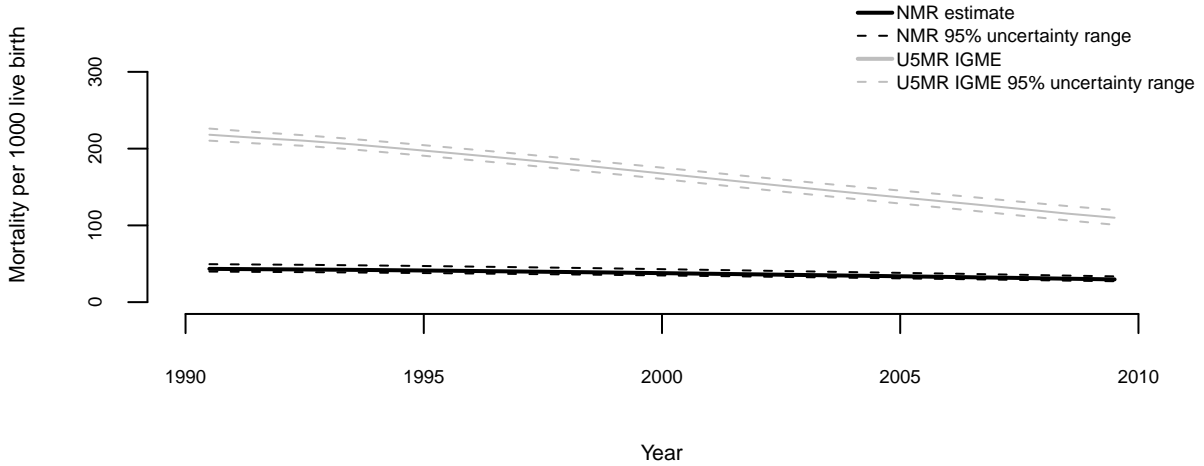

### Malawi NMR as percentage of U5MR

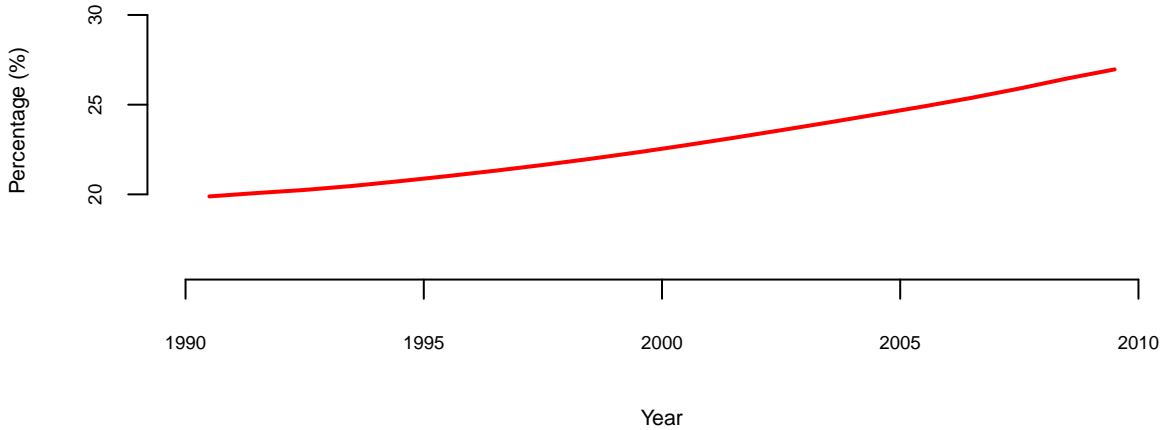

**Malaysia**  
**Data, and estimated NMR**

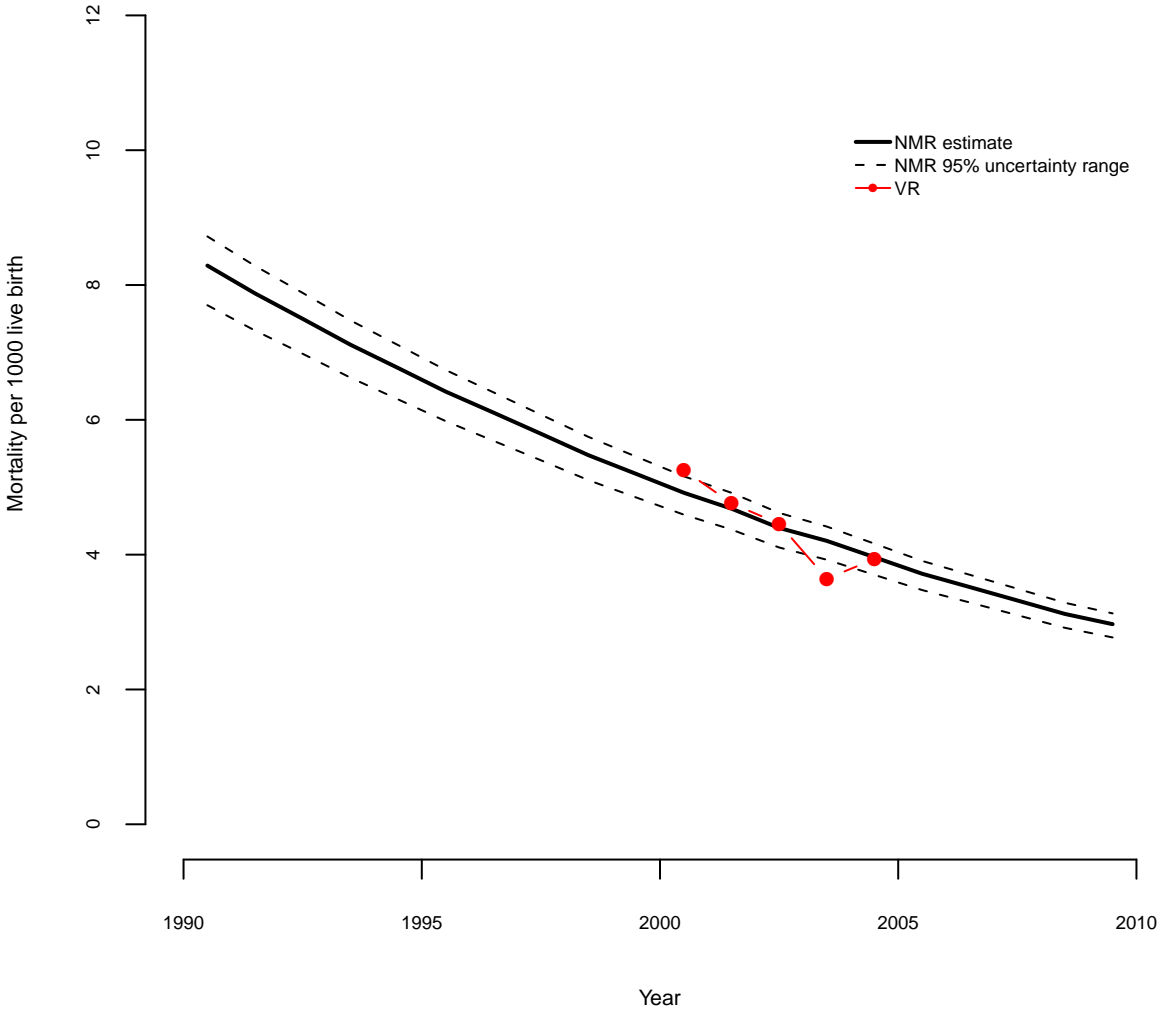

### Malaysia NMR and U5MR

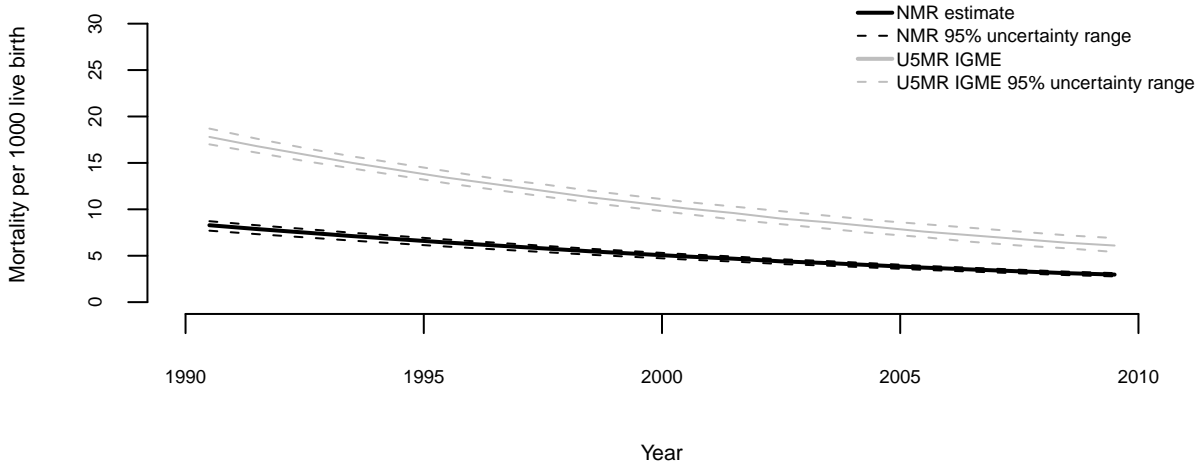

### Malaysia NMR as percentage of U5MR

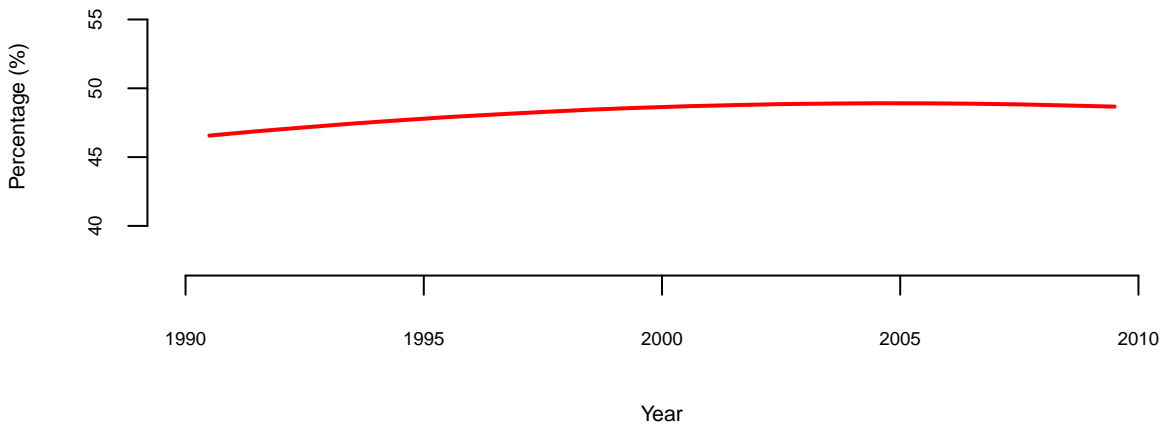

### Maldives Data, and estimated NMR

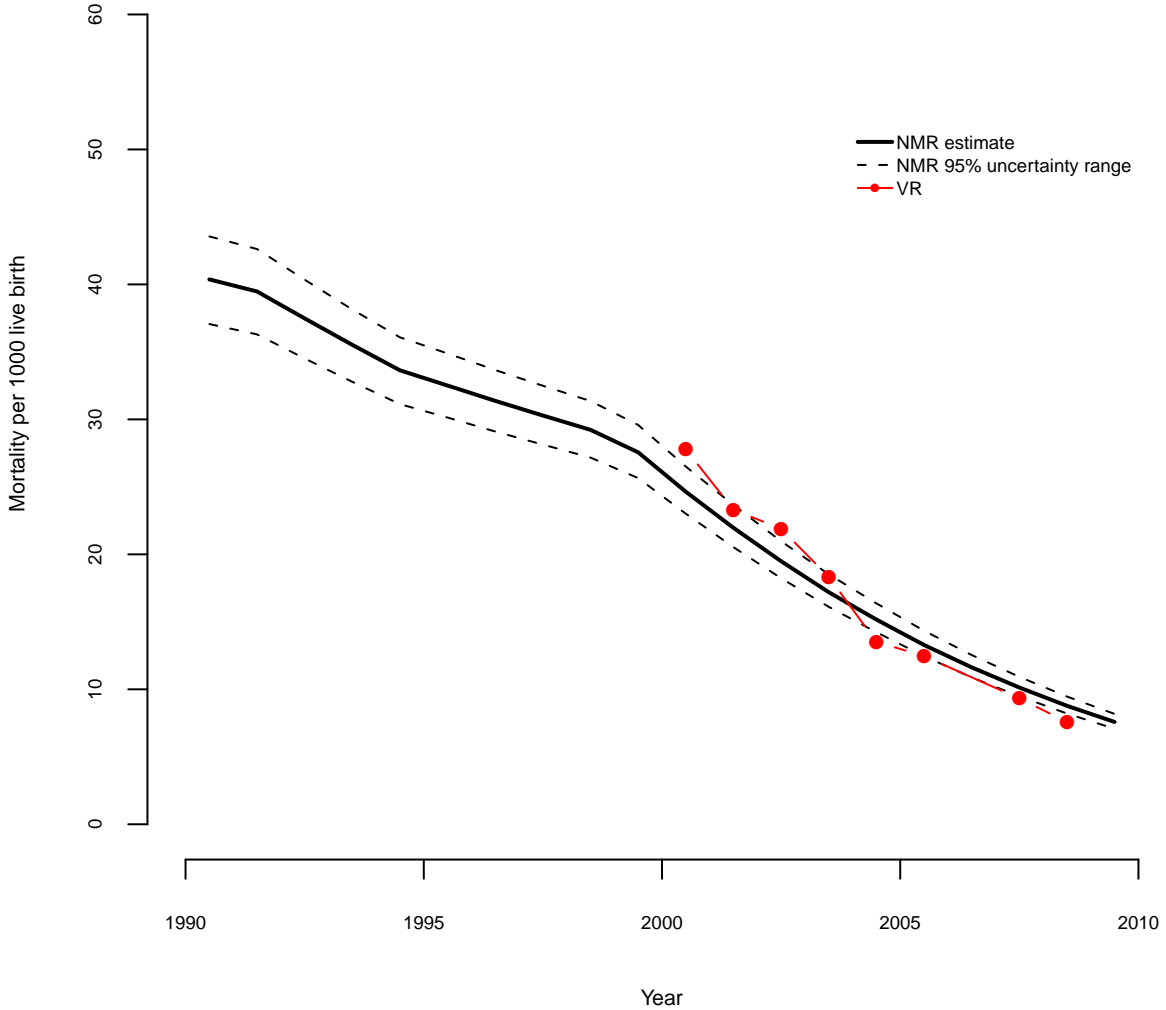

### Maldives NMR and U5MR

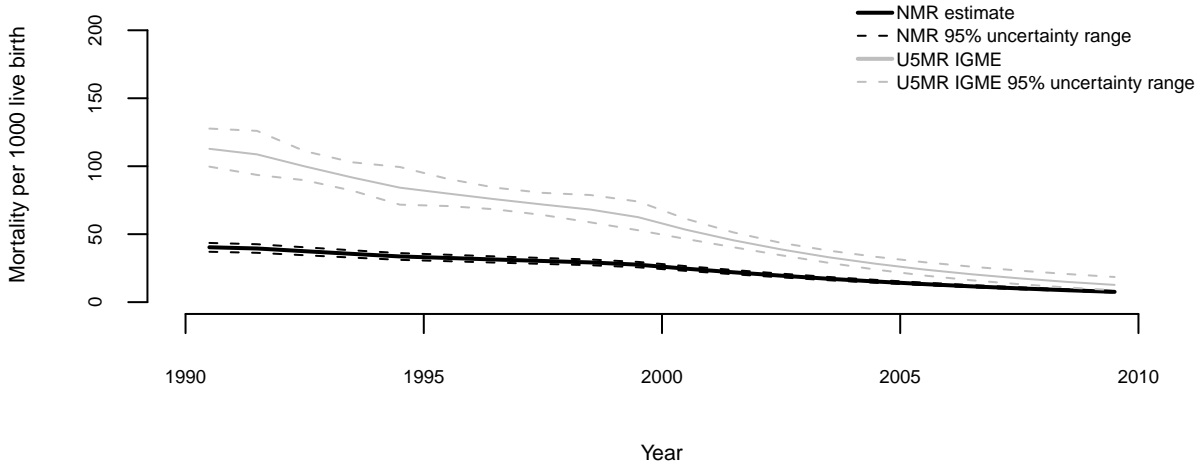

### Maldives NMR as percentage of U5MR

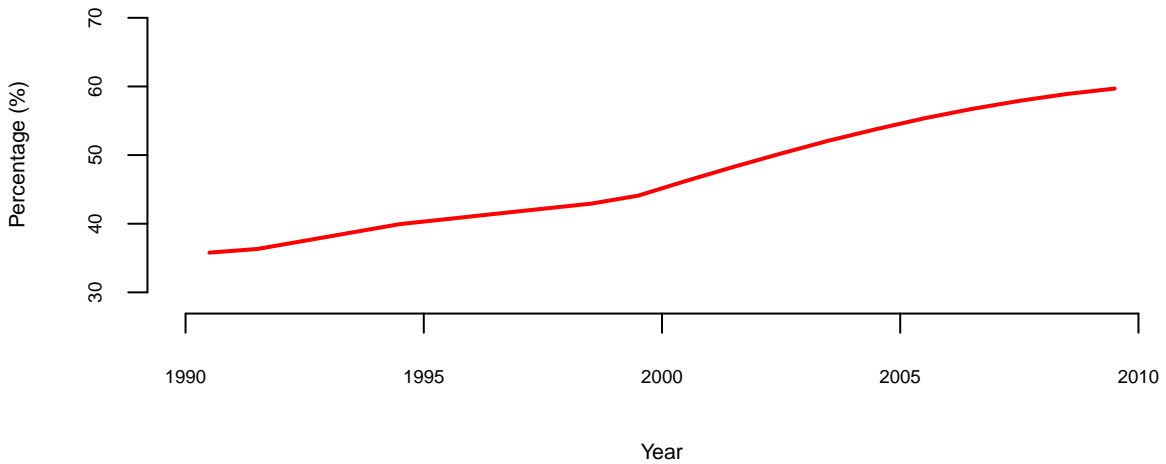



**Mali**  
**Data, and estimated NMR**

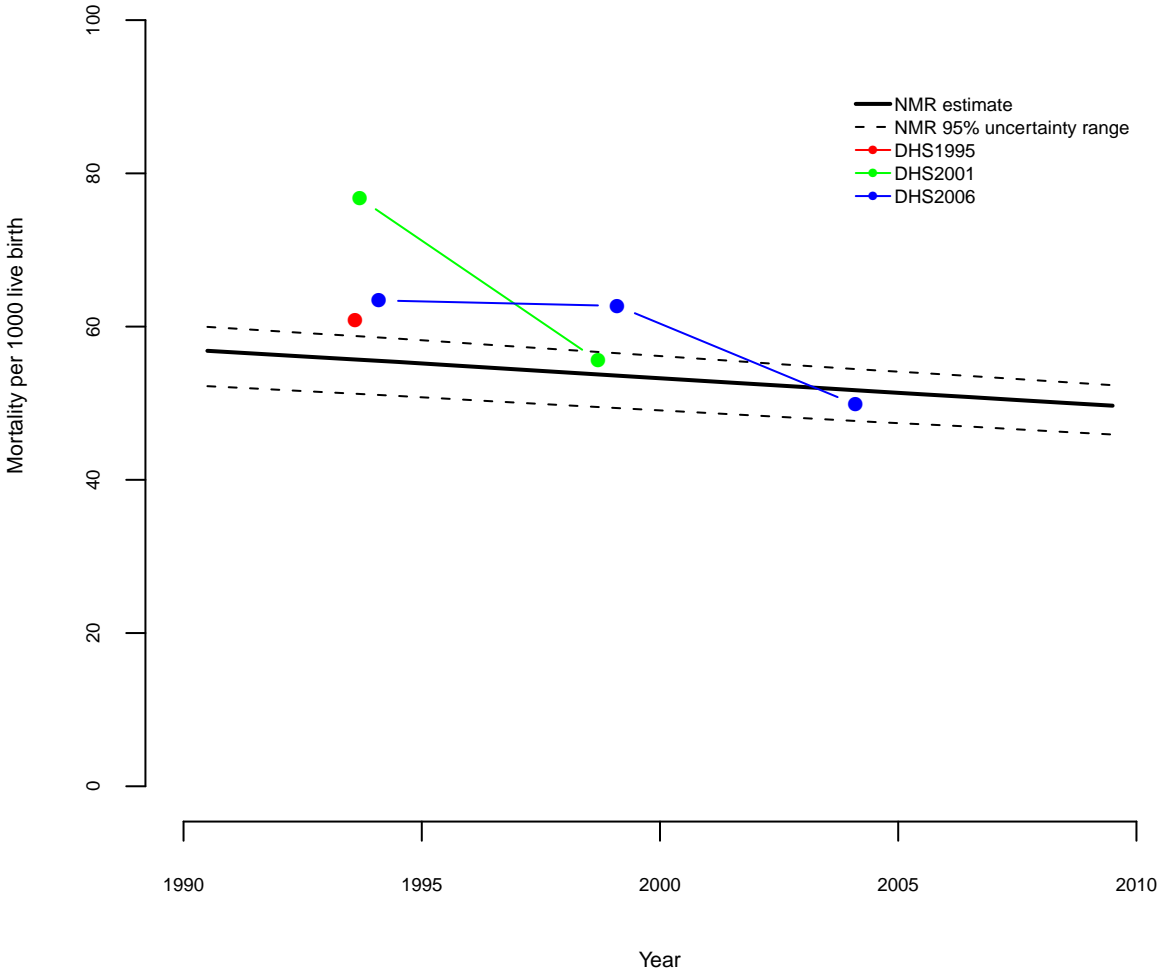

### Mali NMR and U5MR

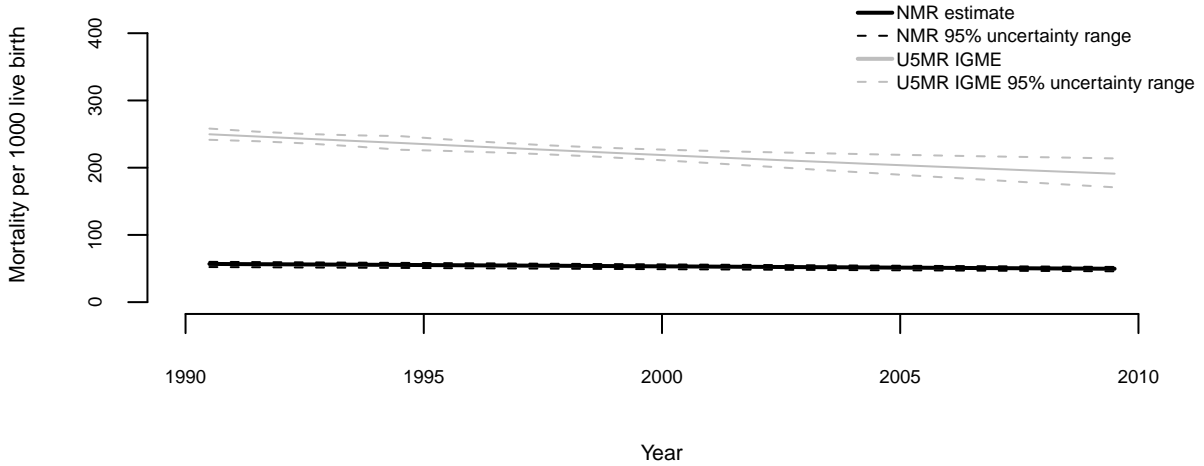

### Mali NMR as percentage of U5MR

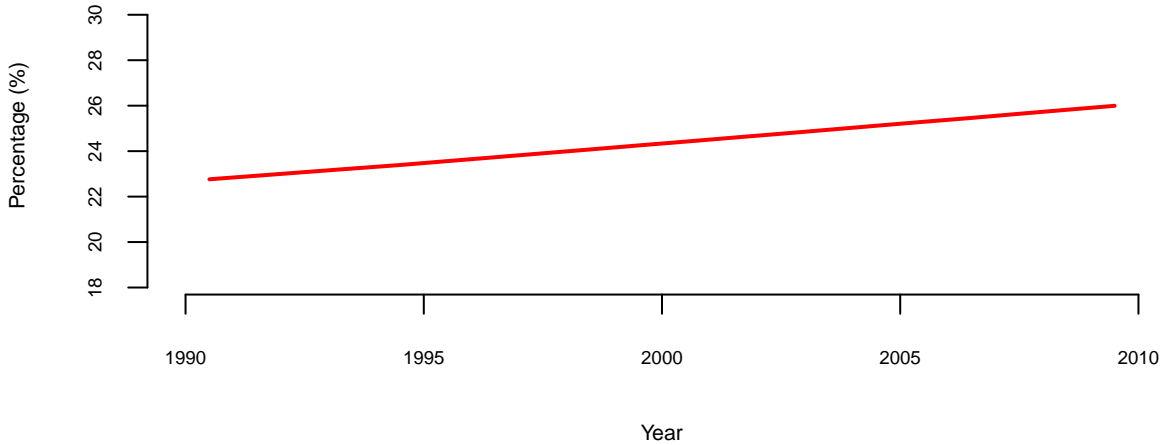

Malta  
Data, and estimated NMR

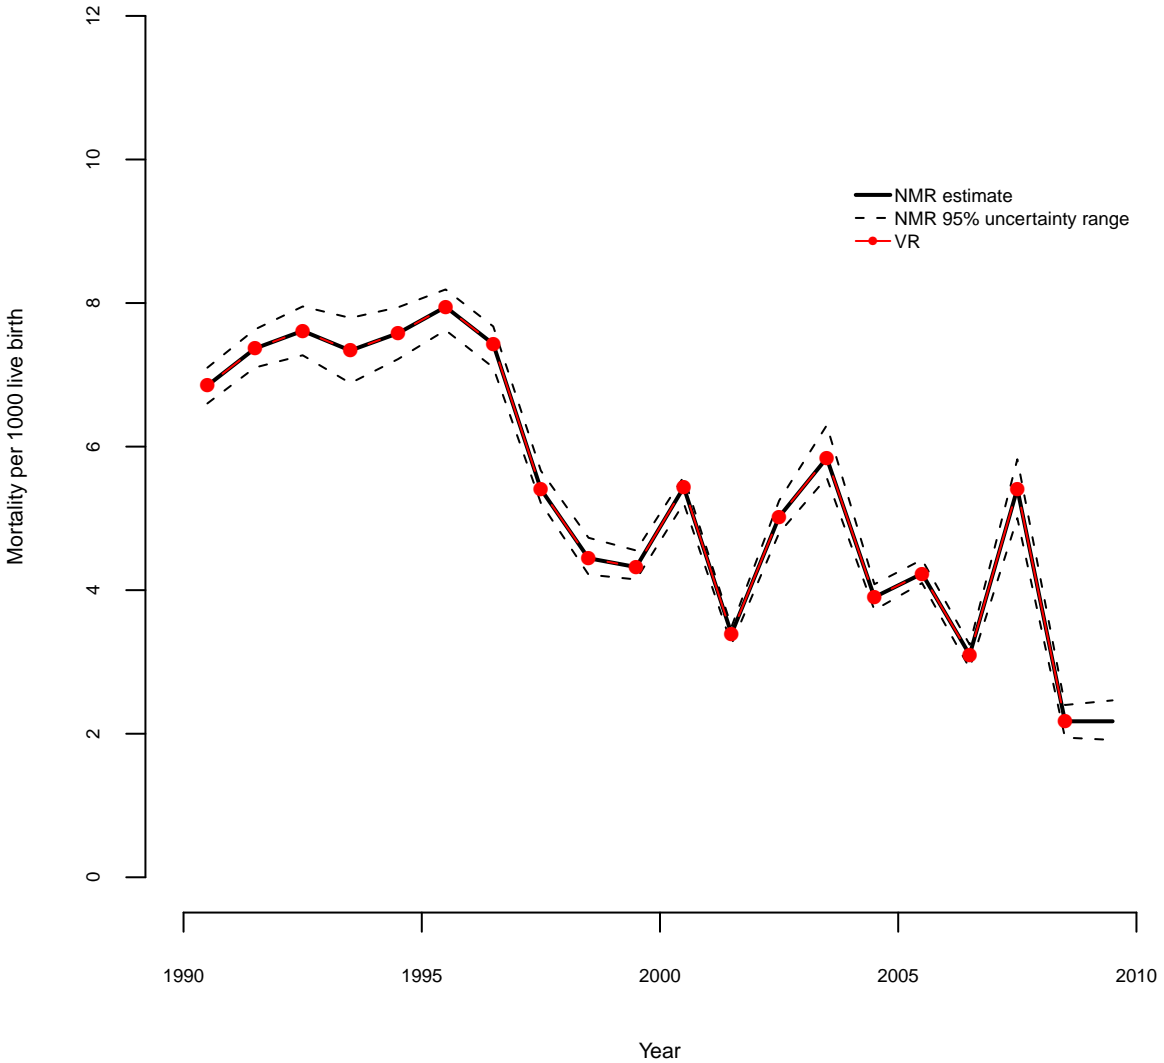

### Malta NMR and U5MR

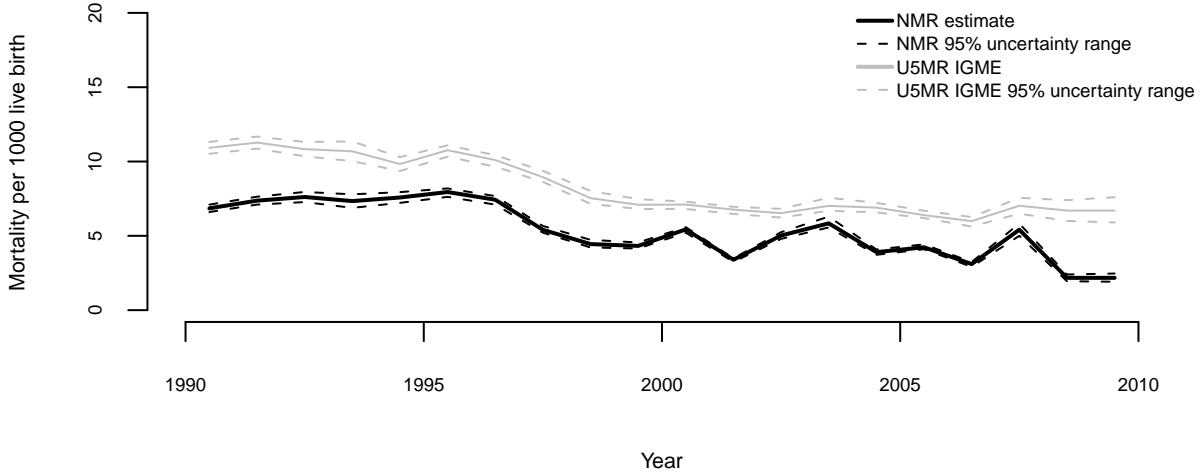

### Malta NMR as percentage of U5MR

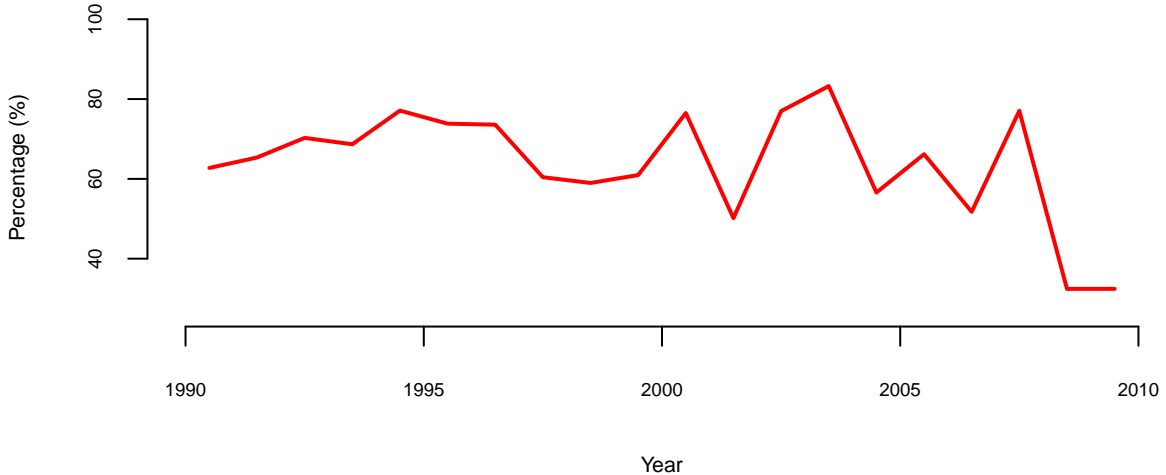

**Marshall Islands**  
**Data, and estimated NMR**

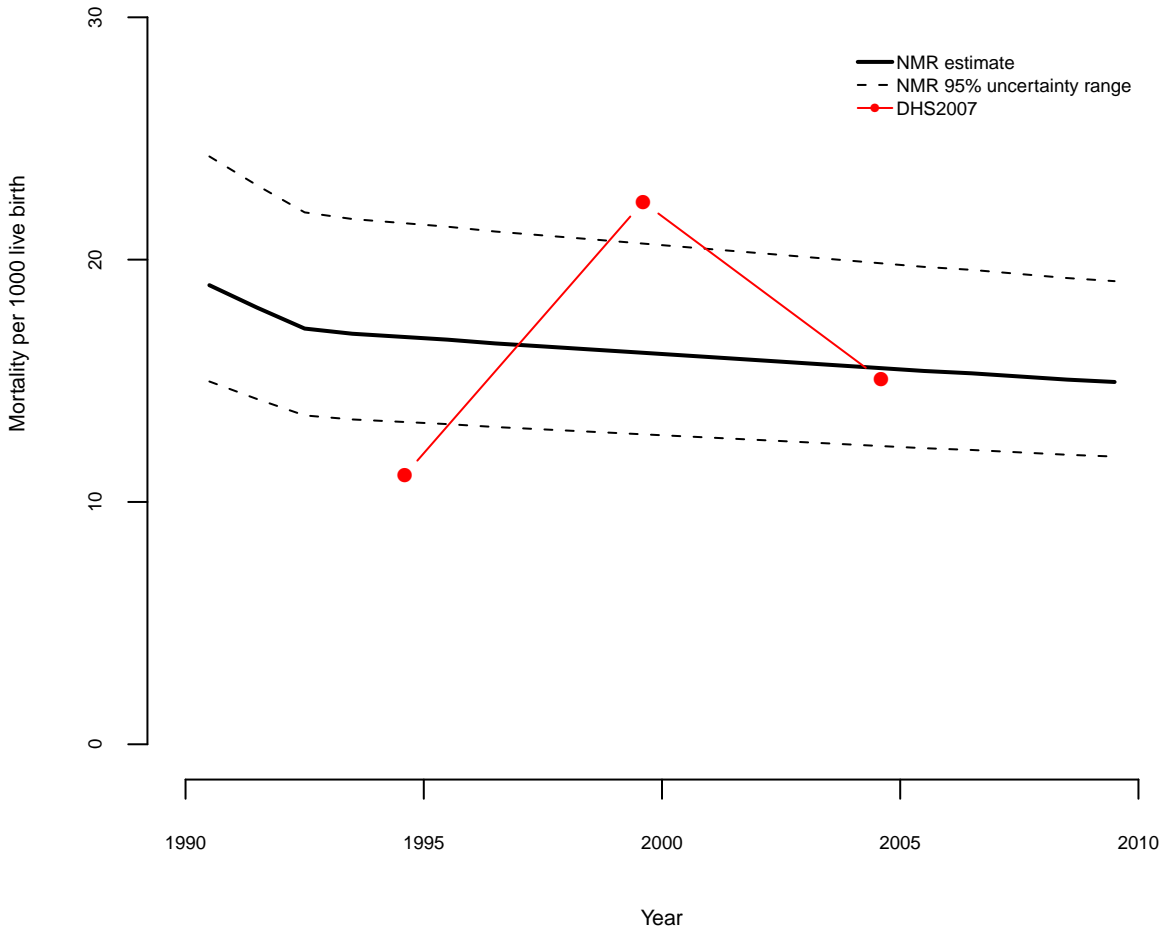

### Marshall Islands NMR and U5MR

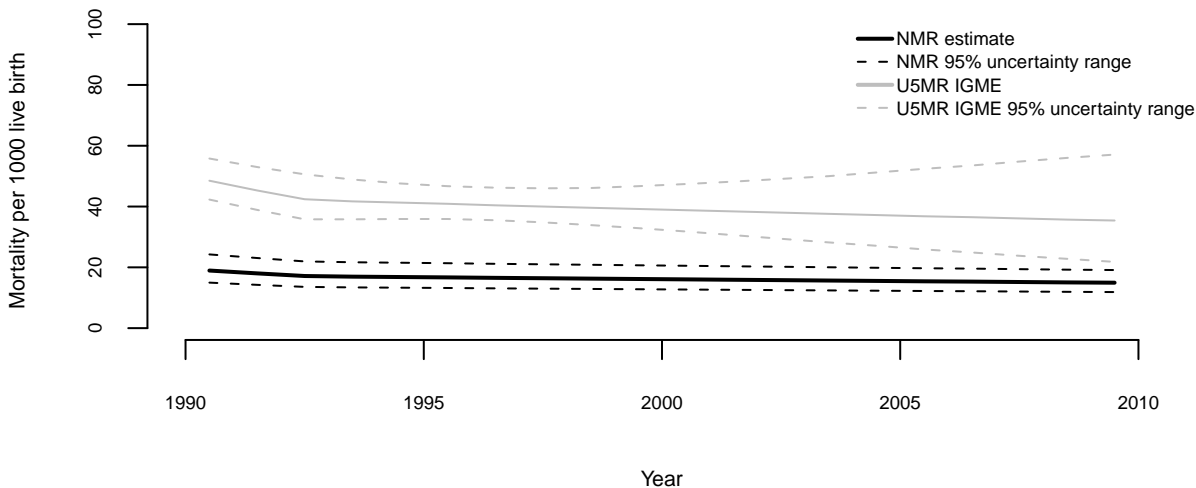

### Marshall Islands NMR as percentage of U5MR

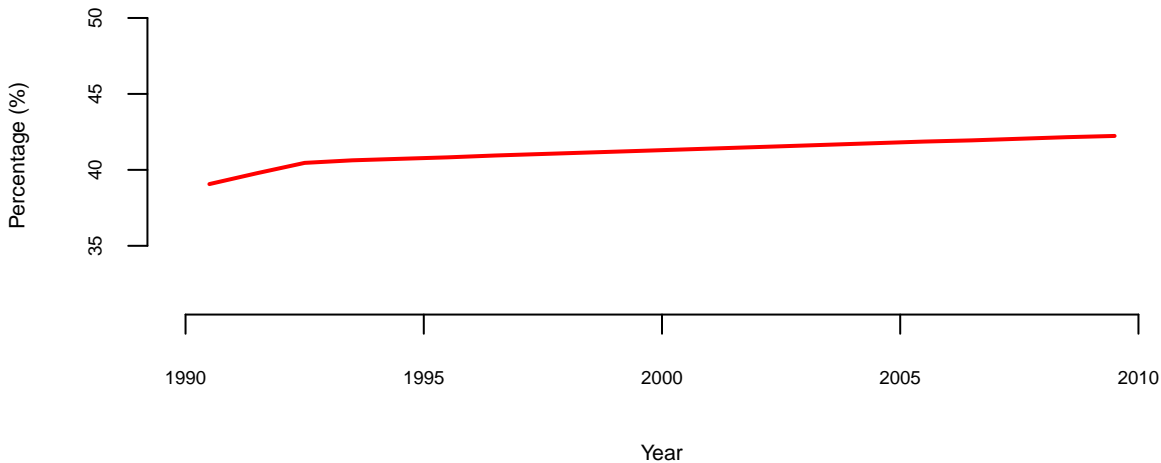

# Mauritania

## Data, and estimated NMR

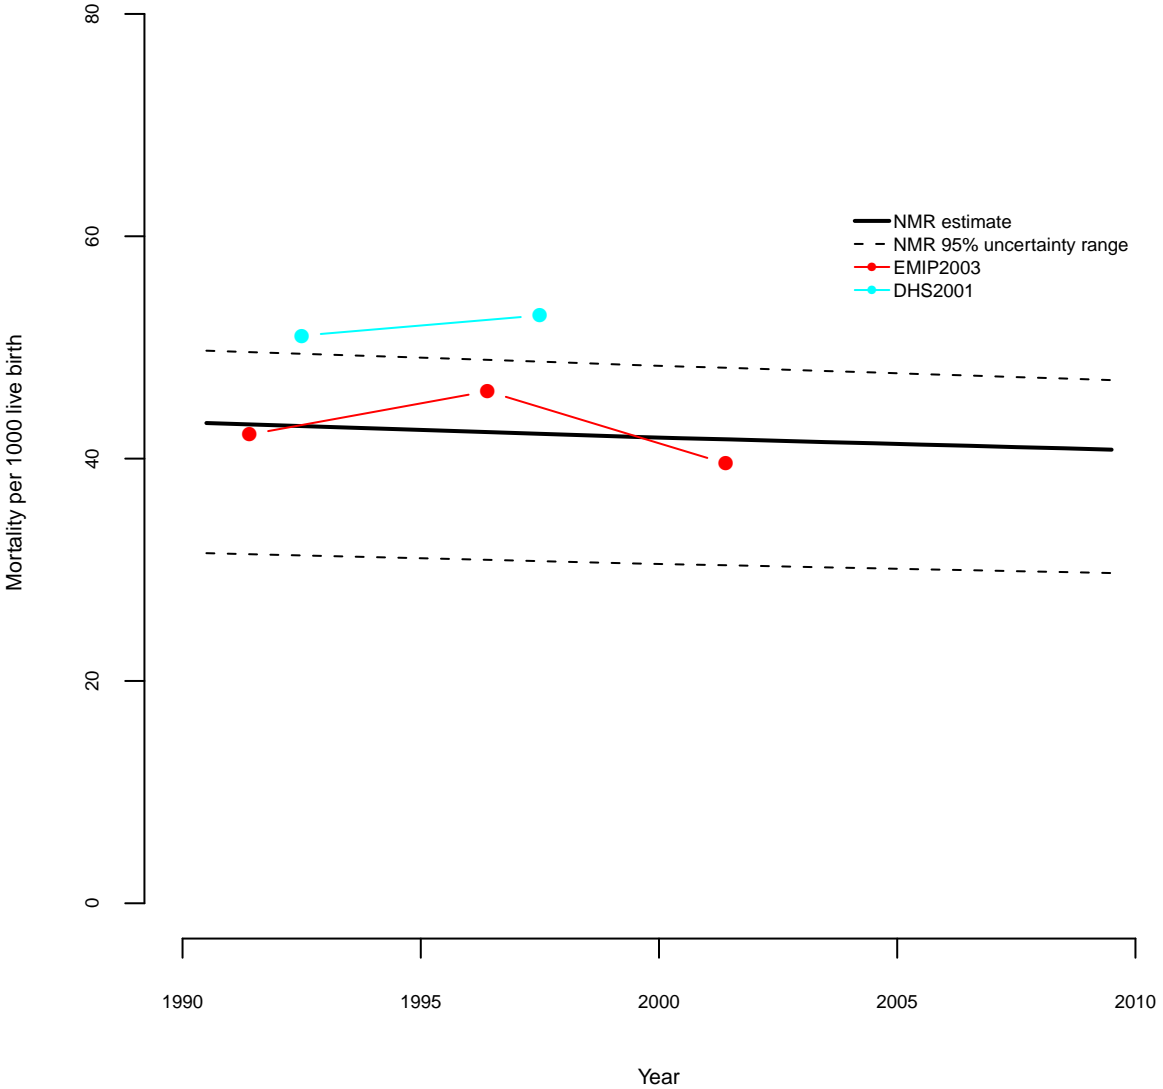

### Mauritania NMR and U5MR

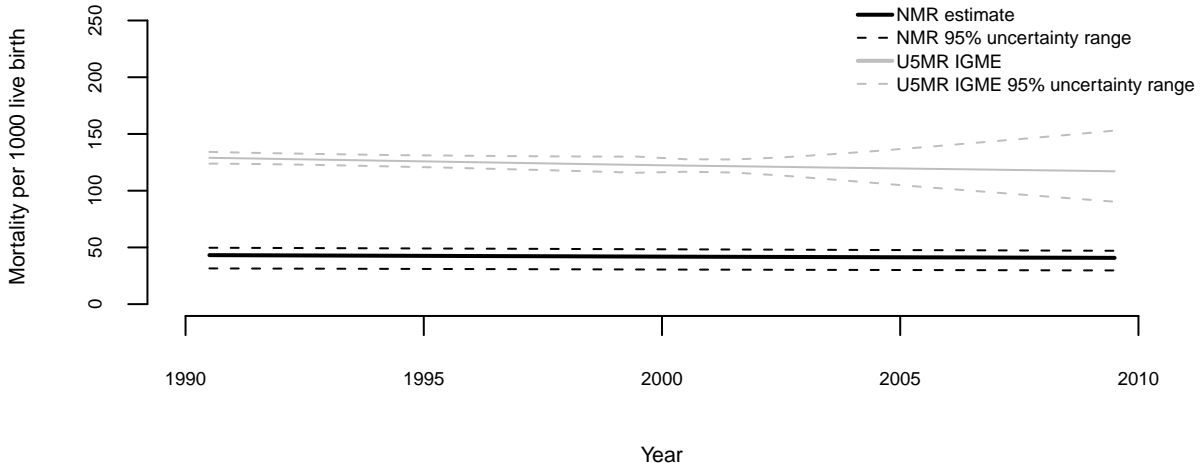

### Mauritania NMR as percentage of U5MR

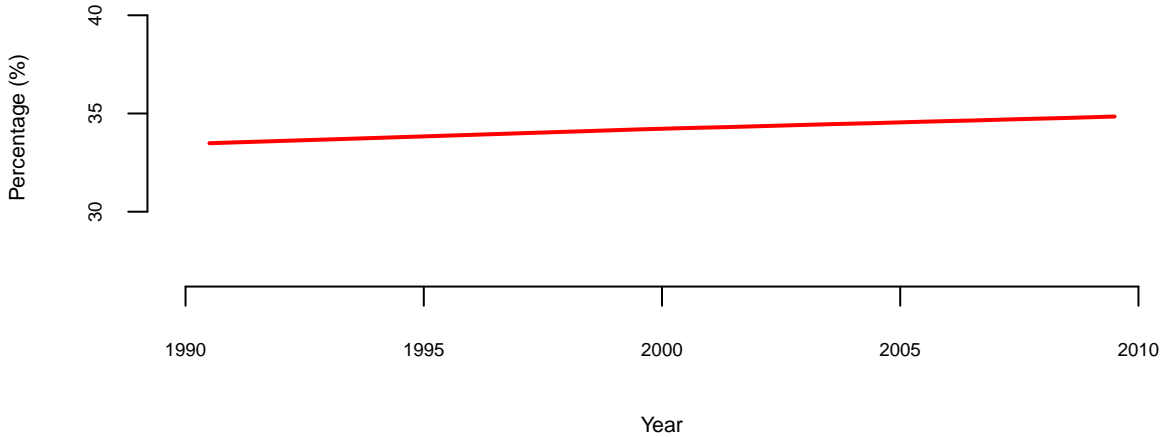



**Mauritius**  
**Data, and estimated NMR**

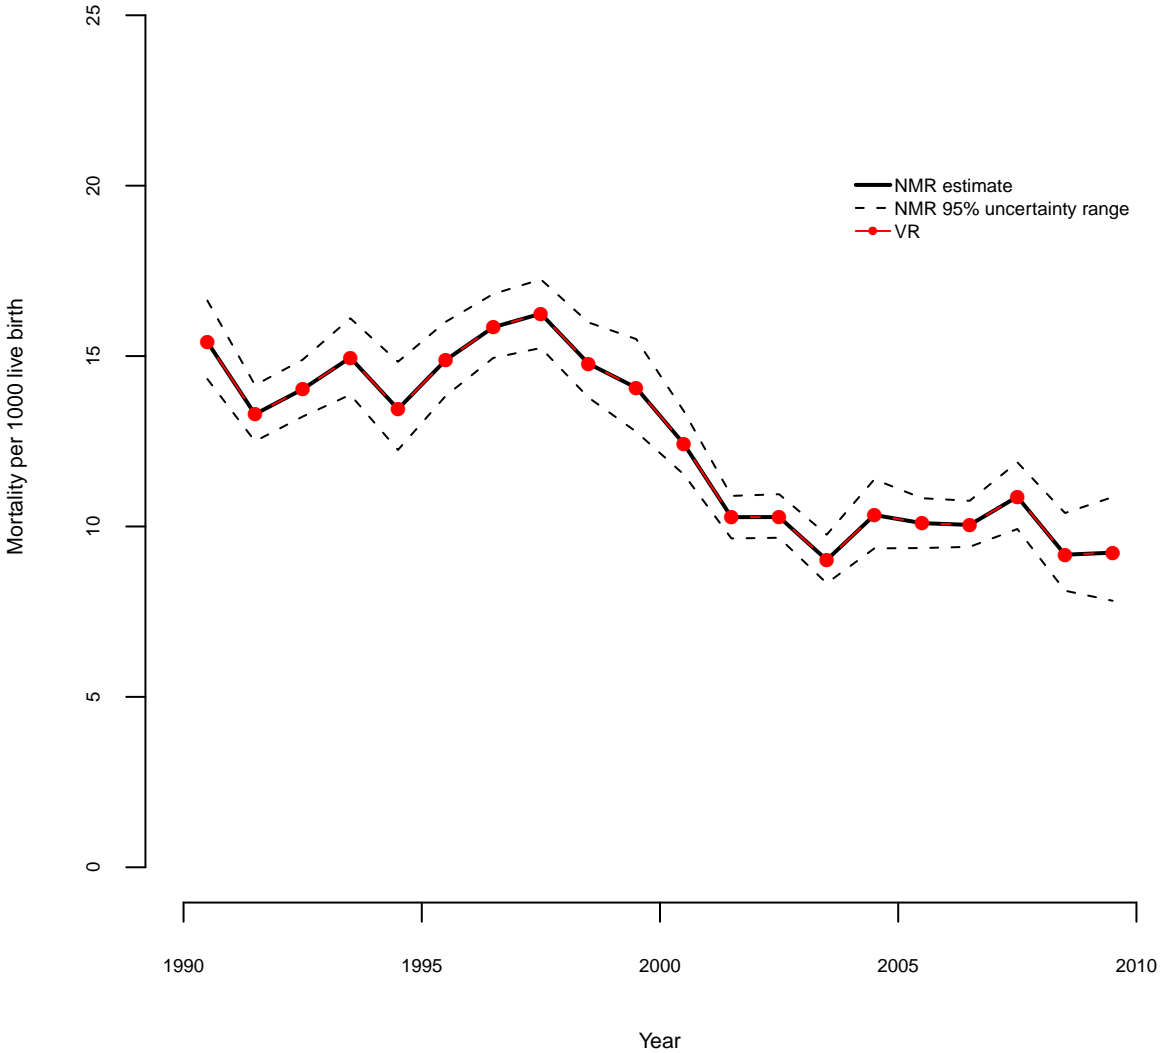

### Mauritius NMR and U5MR

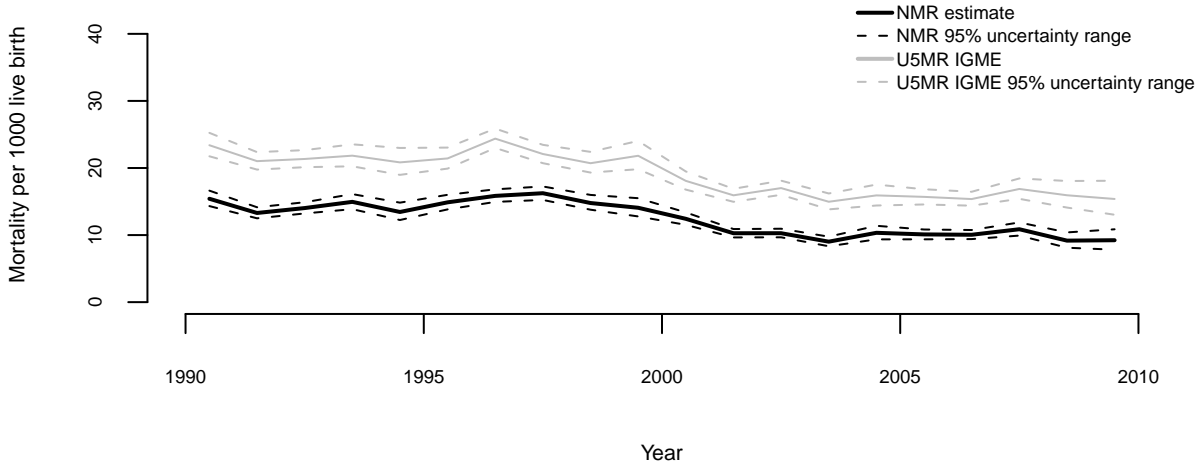

### Mauritius NMR as percentage of U5MR

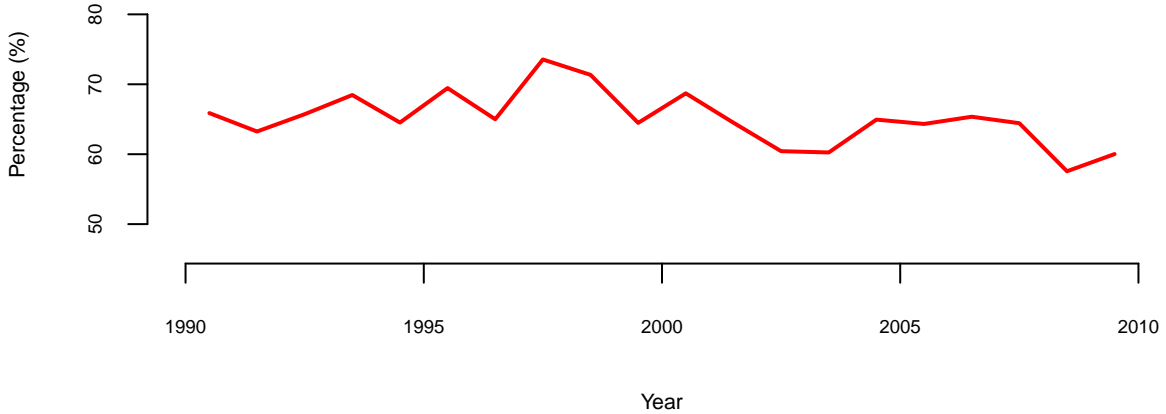

**Mexico**  
**Data, and estimated NMR**

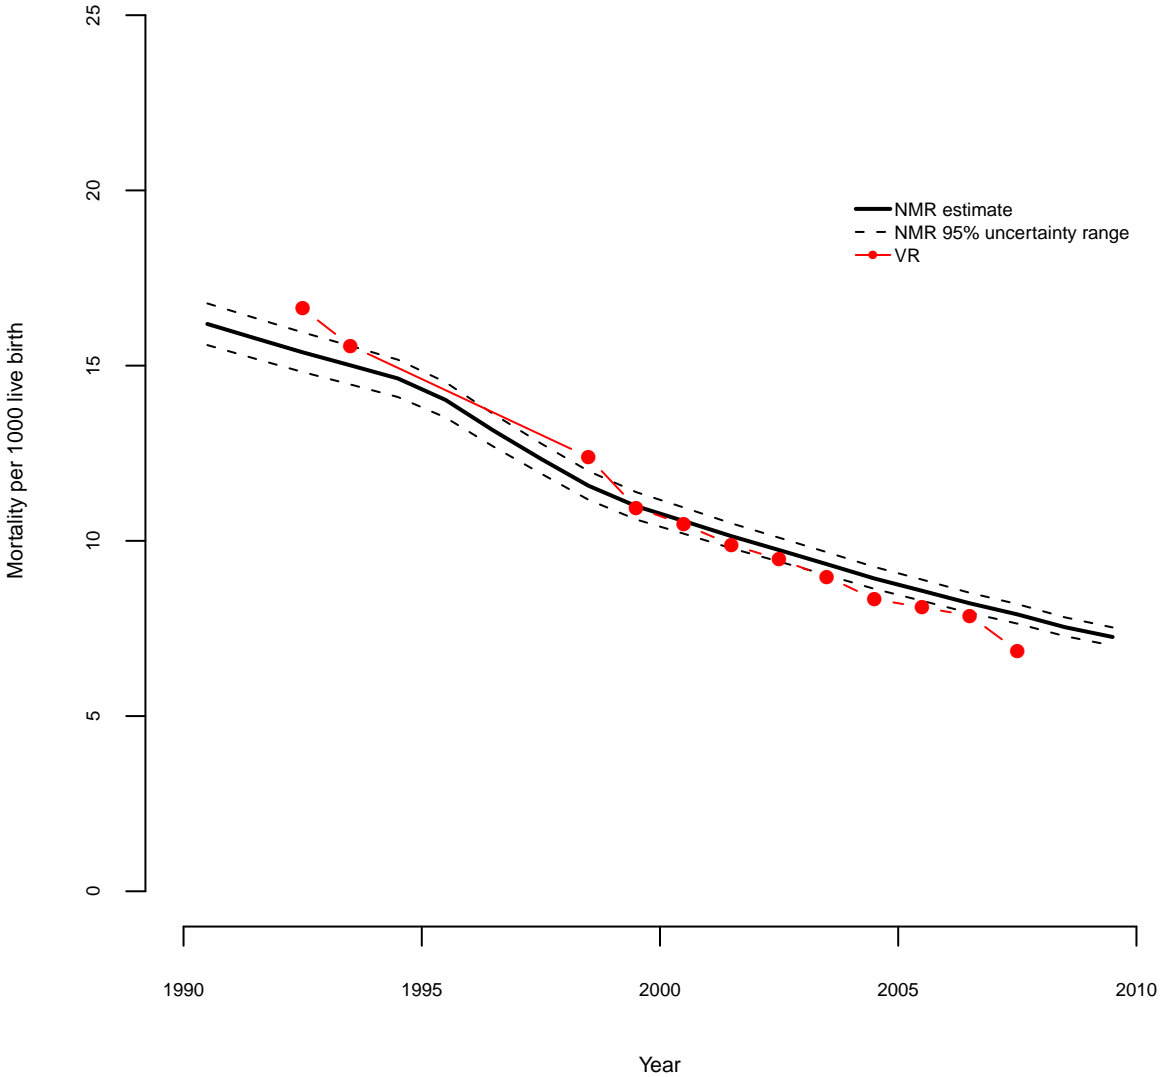

### Mexico NMR and U5MR

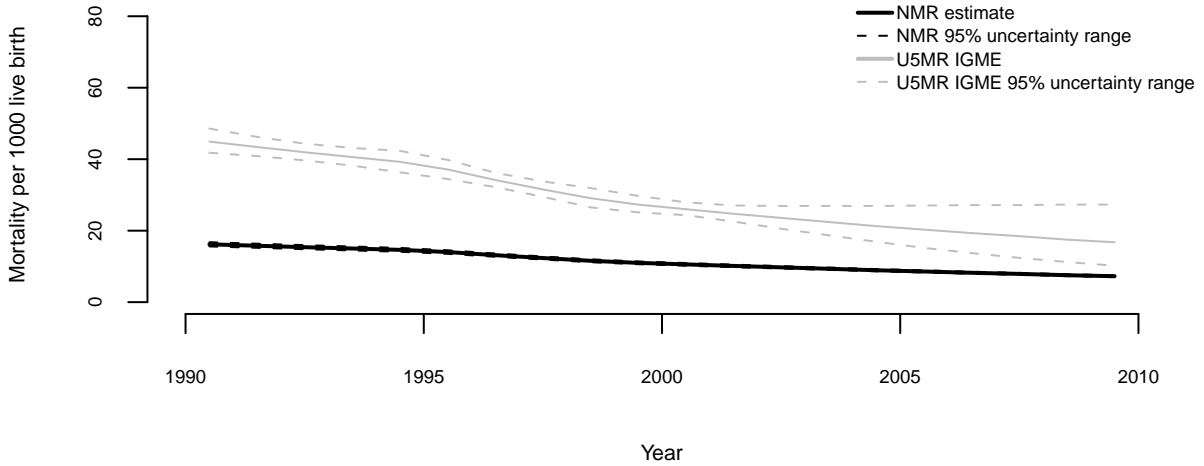

### Mexico NMR as percentage of U5MR

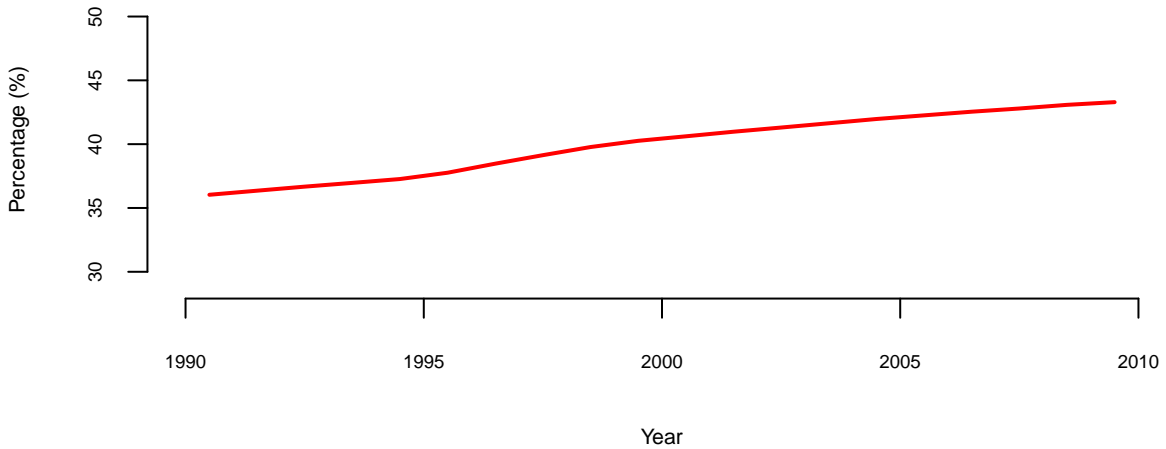

**Micronesia (Federated States of)**  
**Data, and estimated NMR**

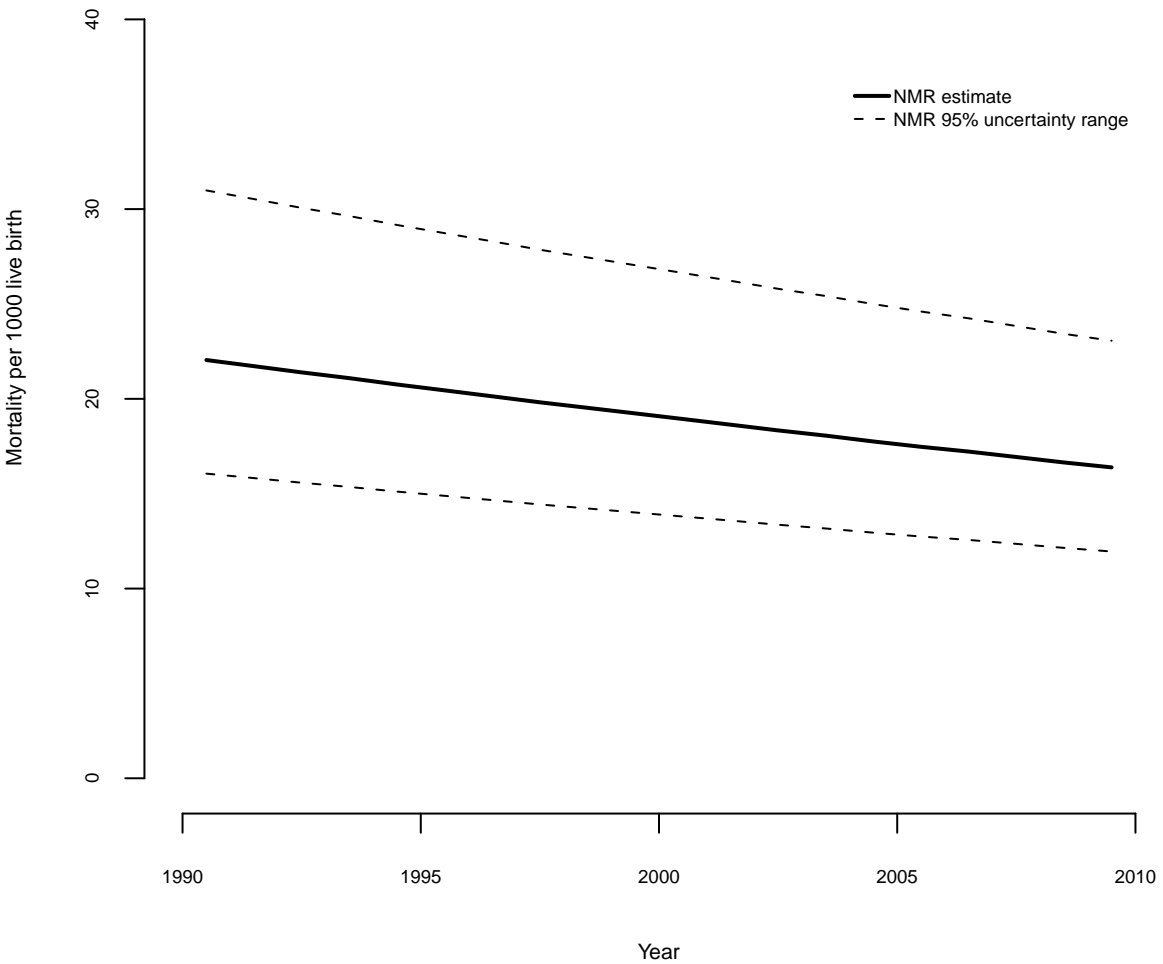

### Micronesia (Federated States of) NMR and U5MR

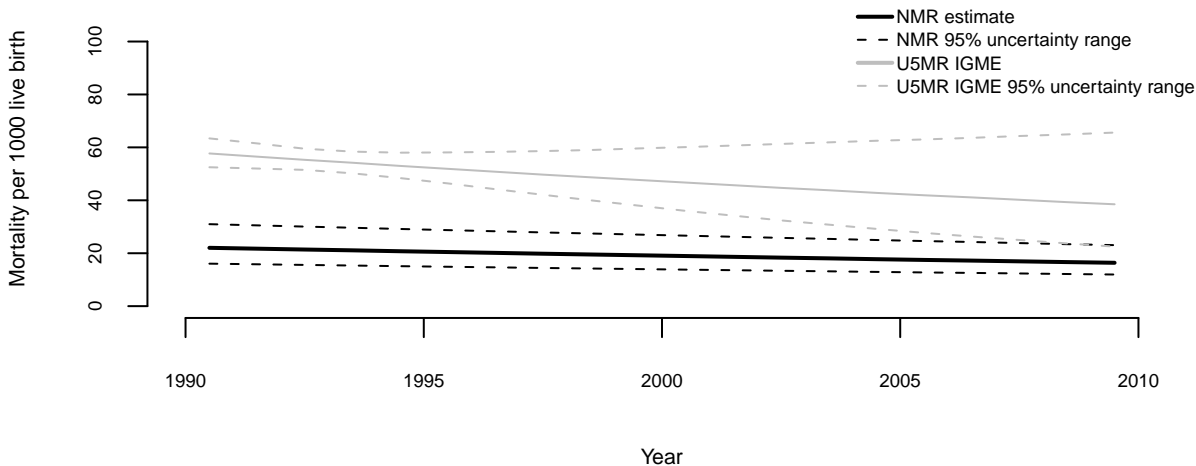

### Micronesia (Federated States of) NMR as percentage of U5MR

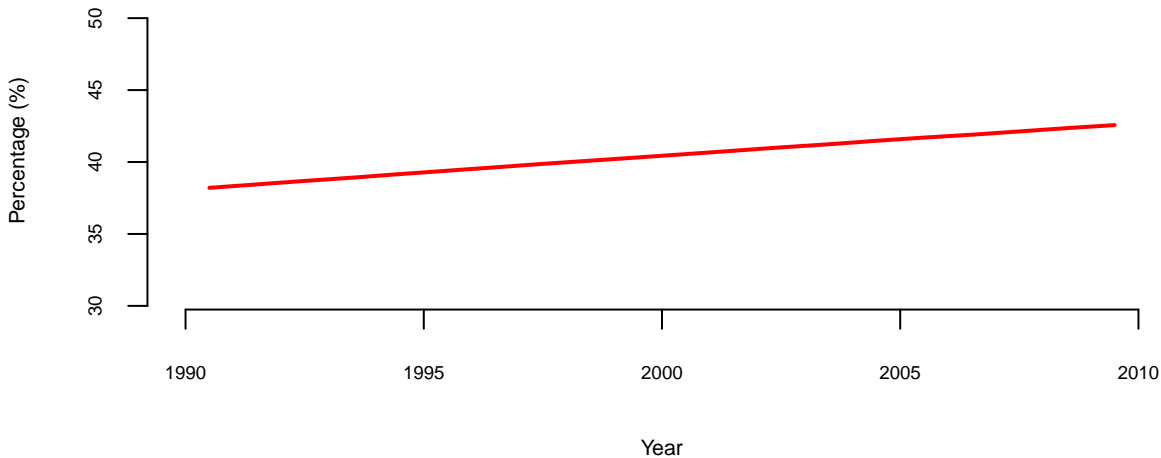

**Monaco**  
**Data, and estimated NMR**

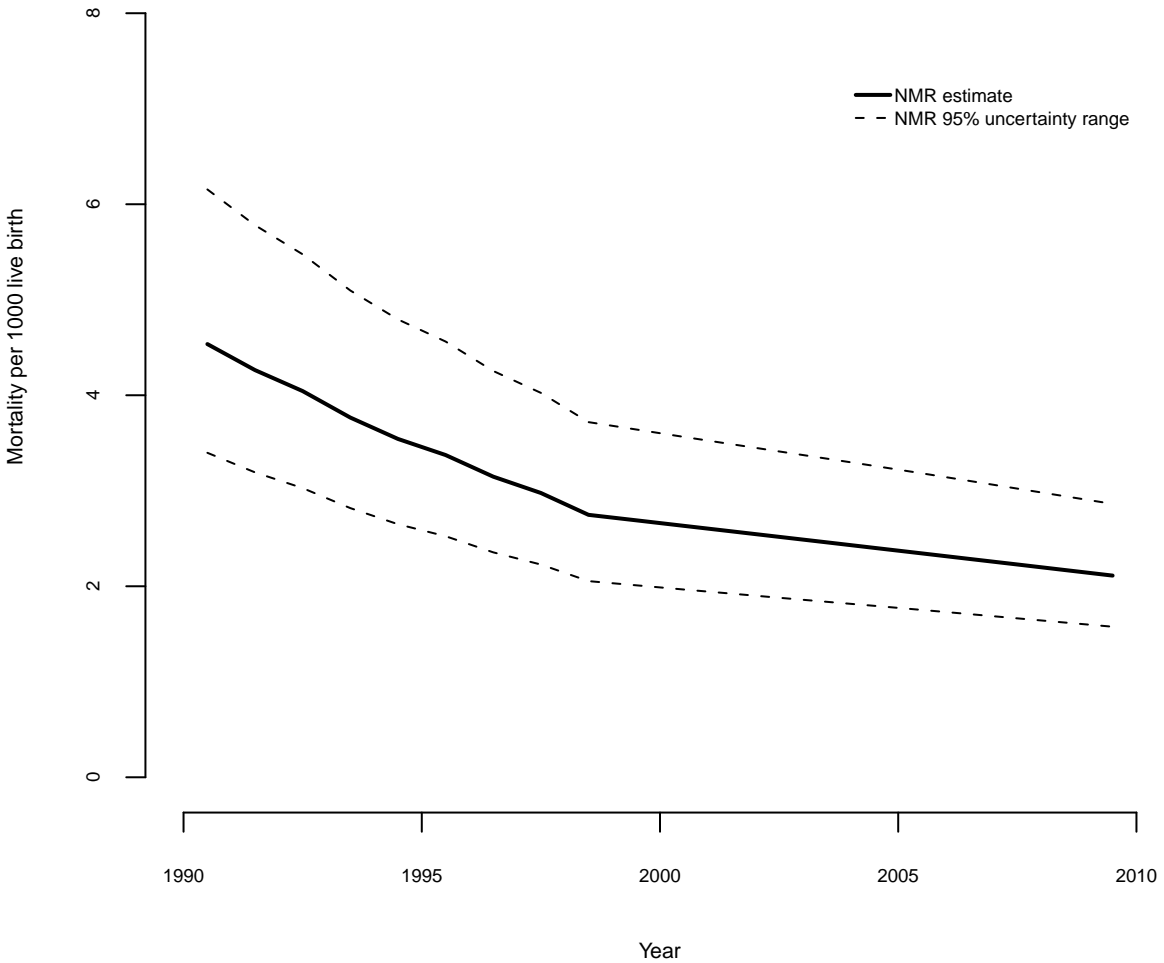

### Monaco NMR and U5MR

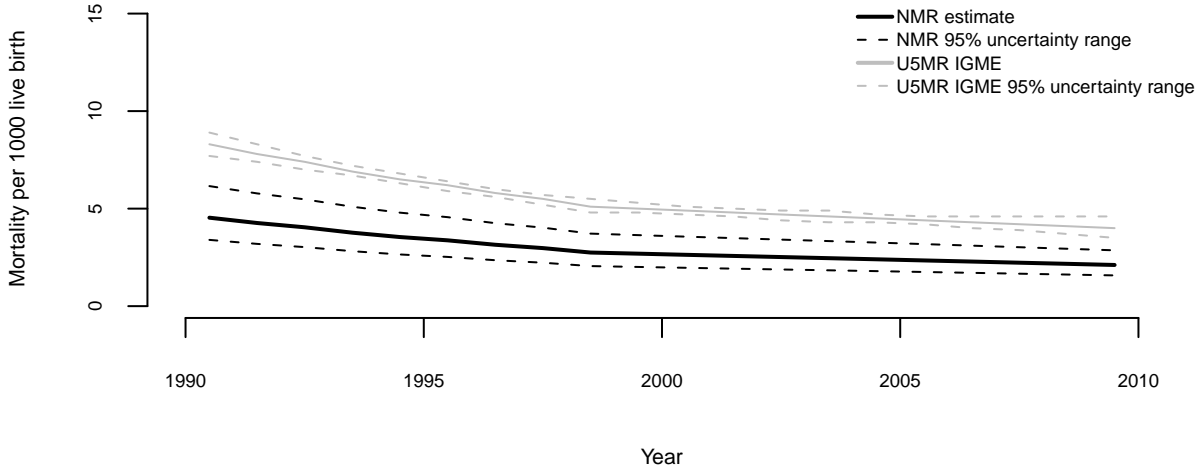

### Monaco NMR as percentage of U5MR

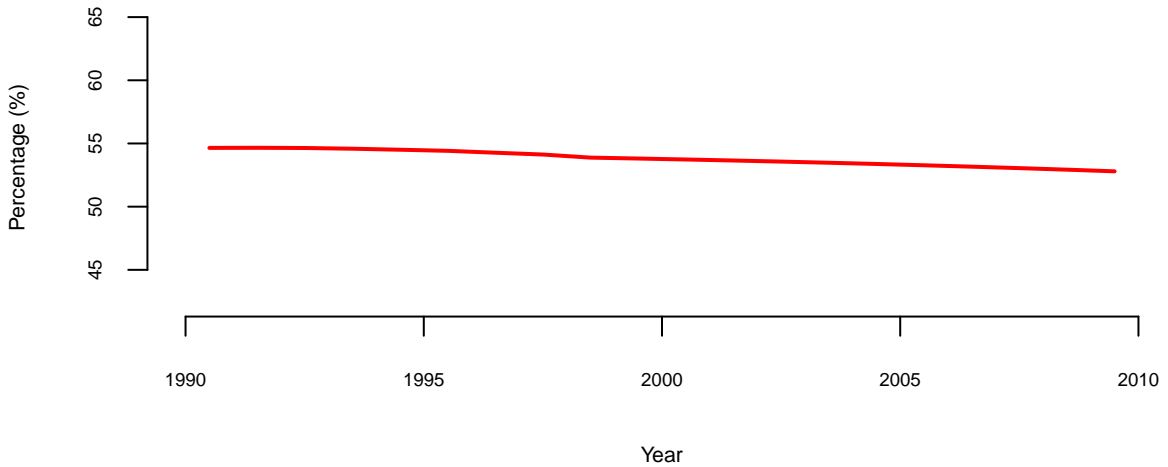



# Mongolia

## Data, and estimated NMR

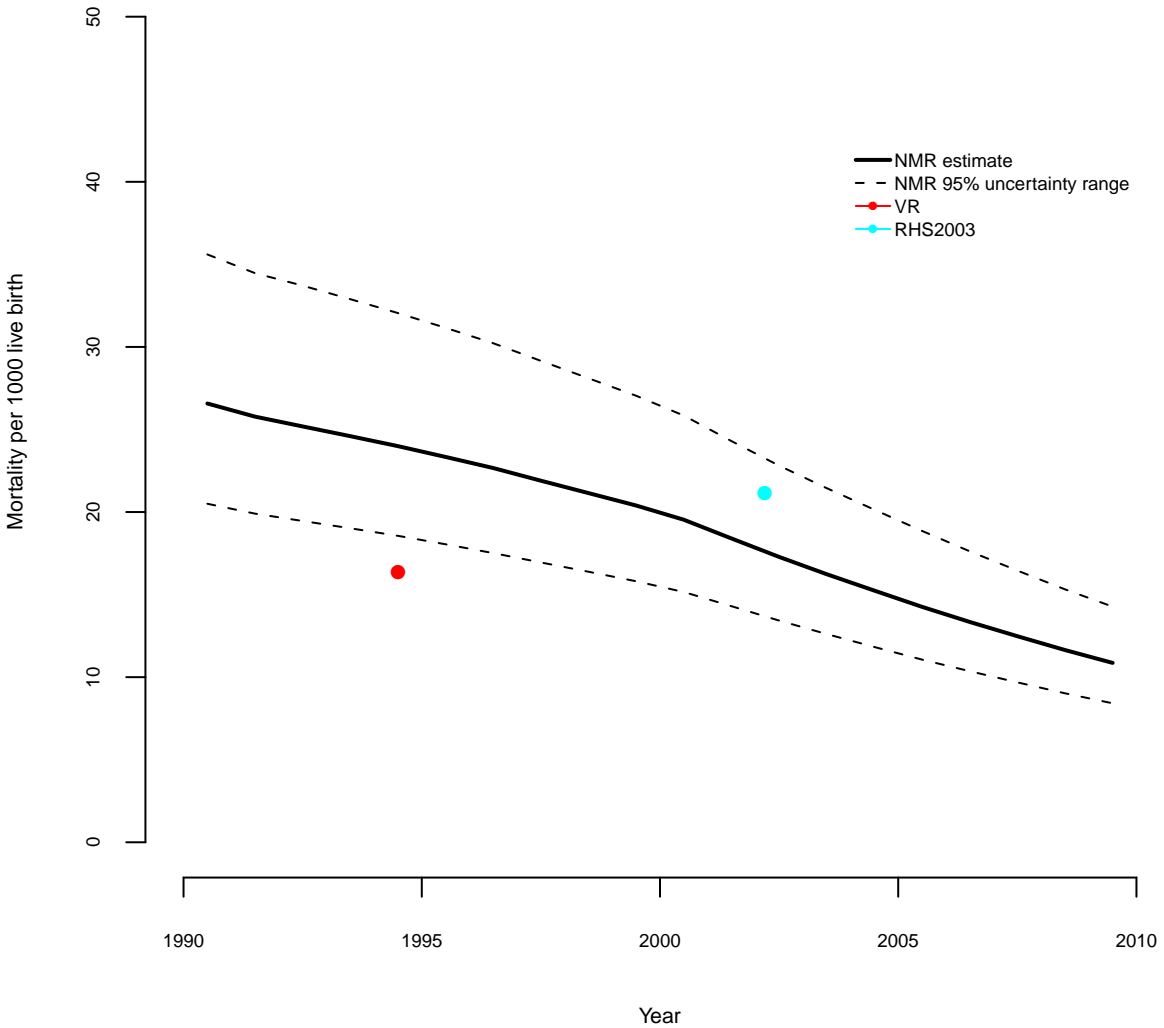

### Mongolia NMR and U5MR

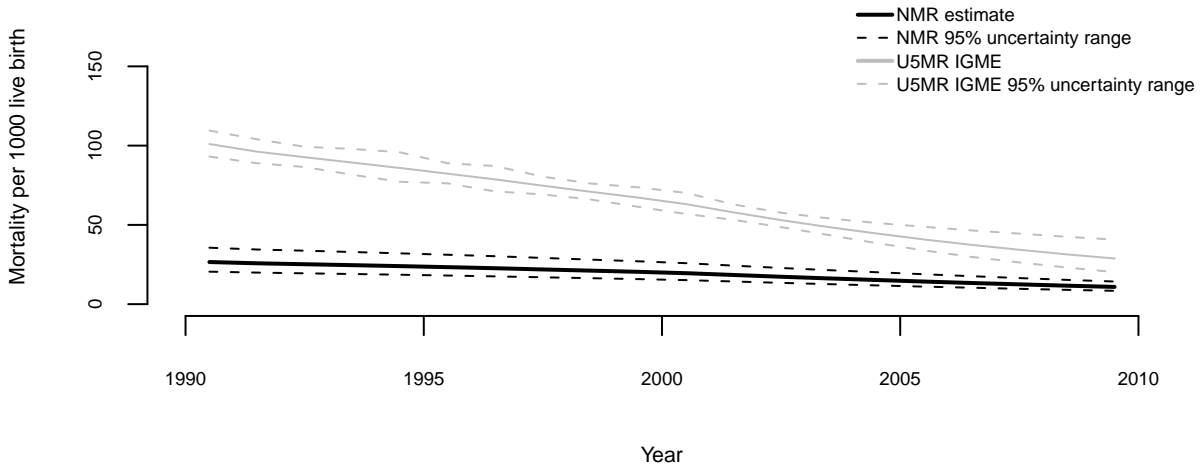

### Mongolia NMR as percentage of U5MR

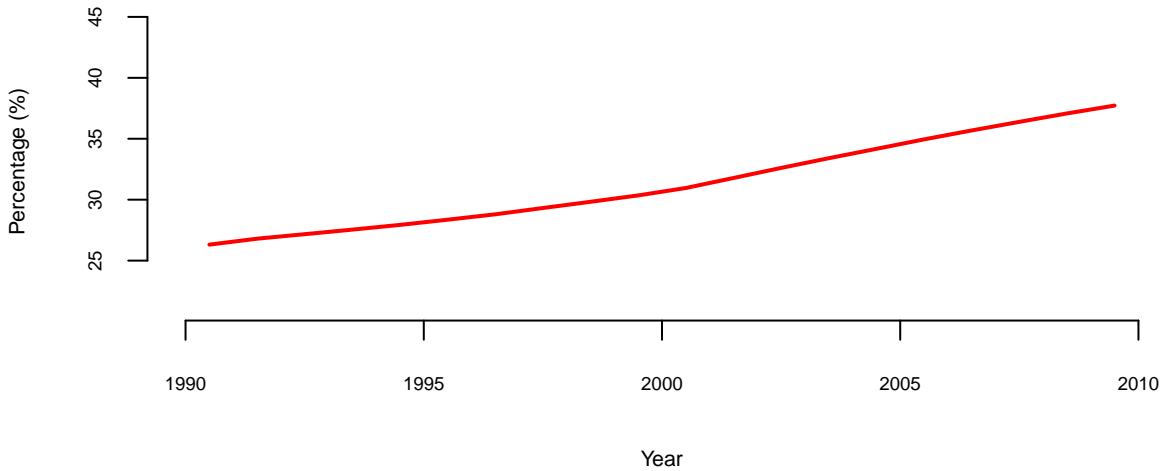

### Montenegro Data, and estimated NMR

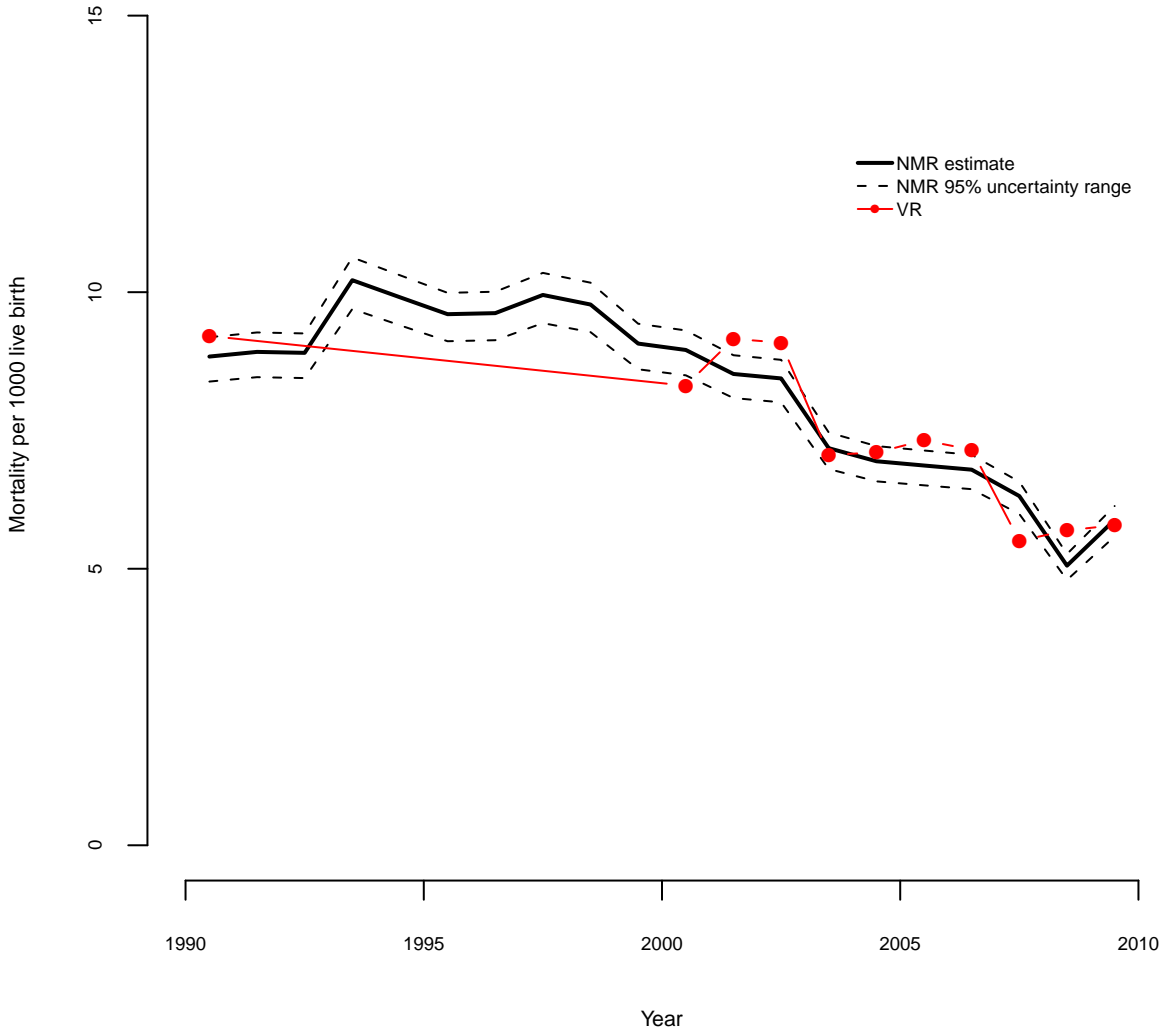

### Montenegro NMR and U5MR

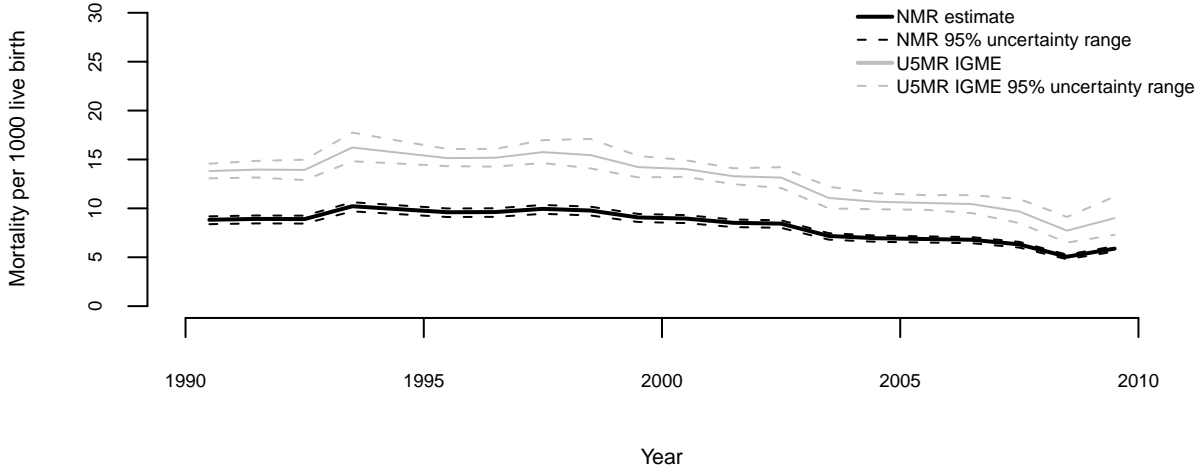

### Montenegro NMR as percentage of U5MR

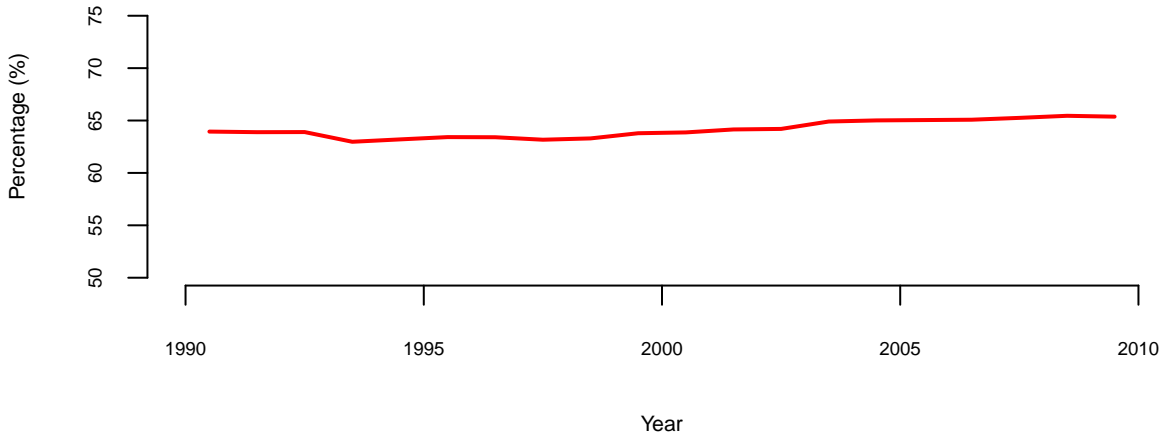

# Morocco

## Data, and estimated NMR

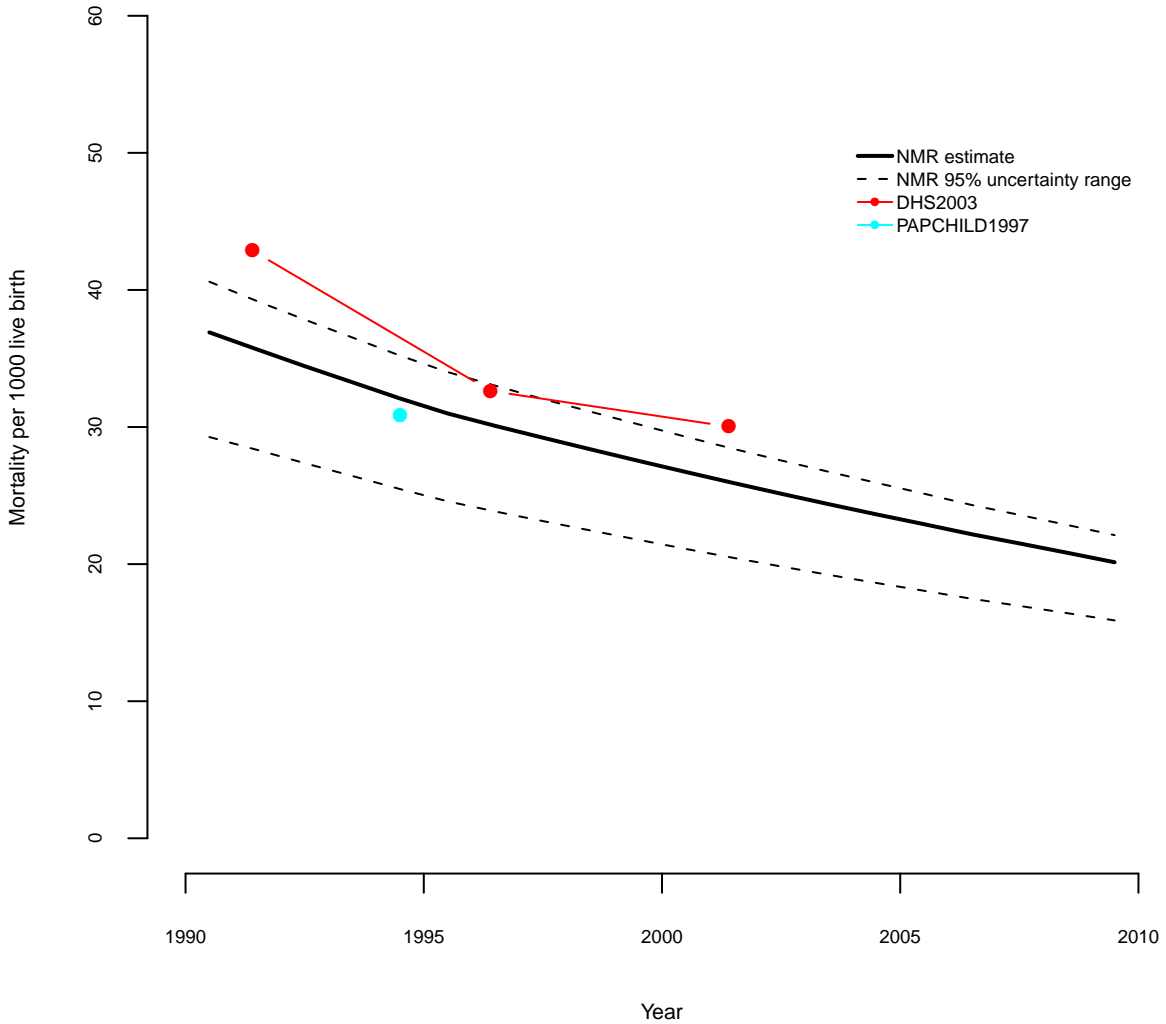

### Morocco NMR and U5MR

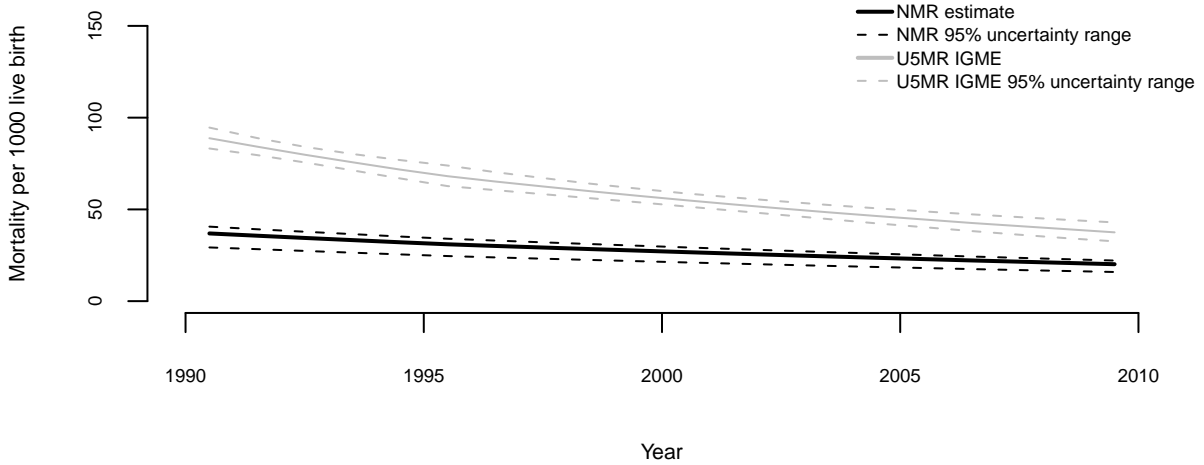

### Morocco NMR as percentage of U5MR

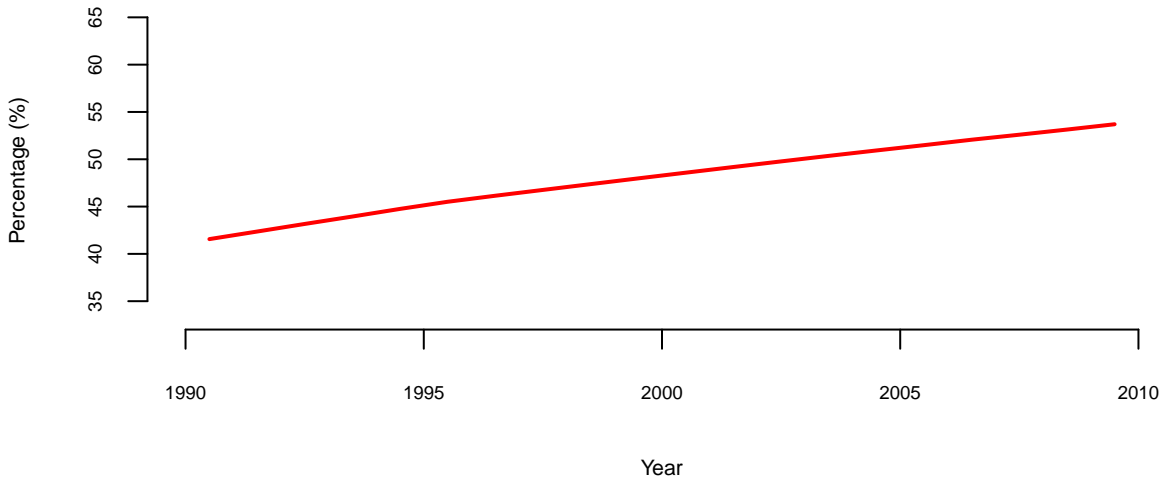

### Mozambique Data, and estimated NMR

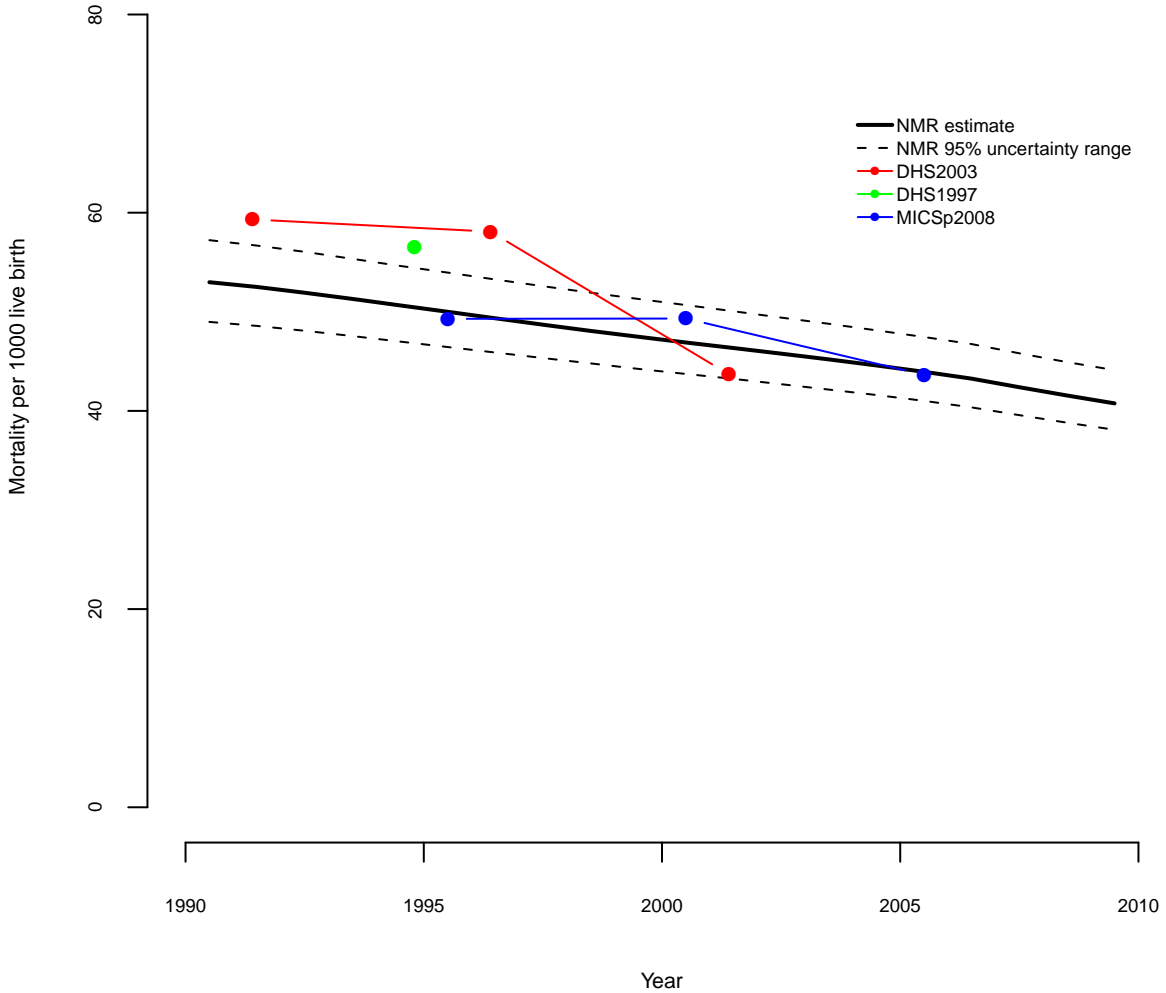

### Mozambique NMR and U5MR

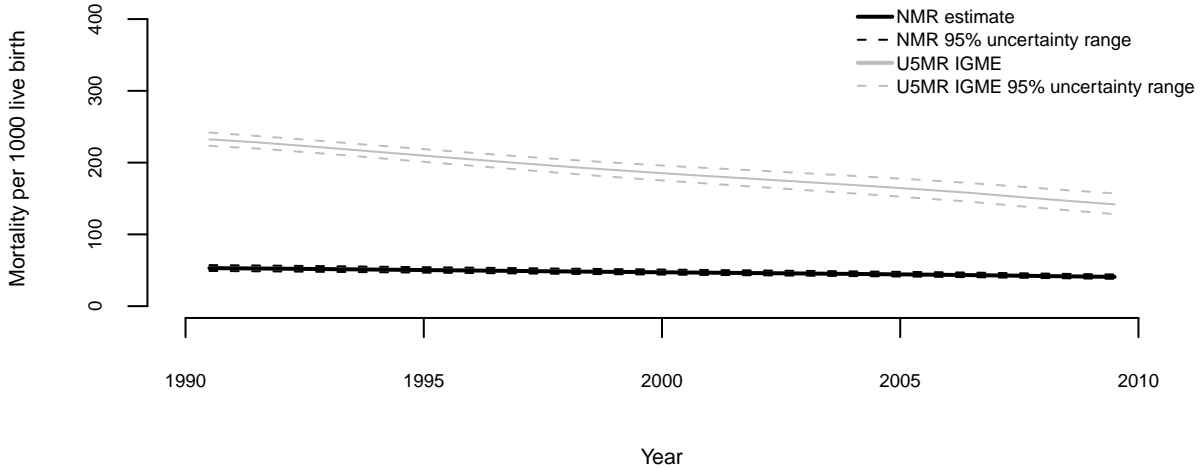

### Mozambique NMR as percentage of U5MR

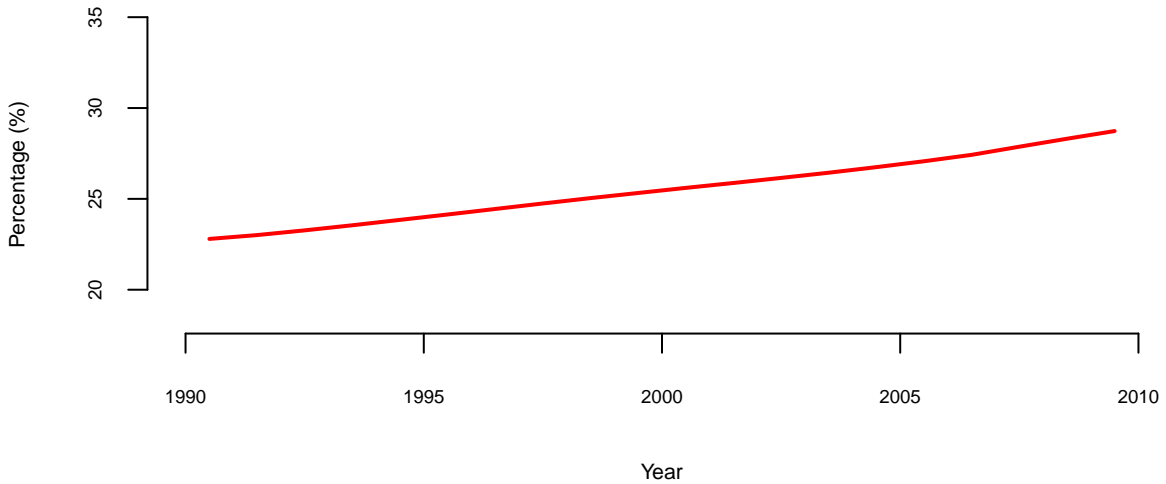



Myanmar  
Data, and estimated NMR

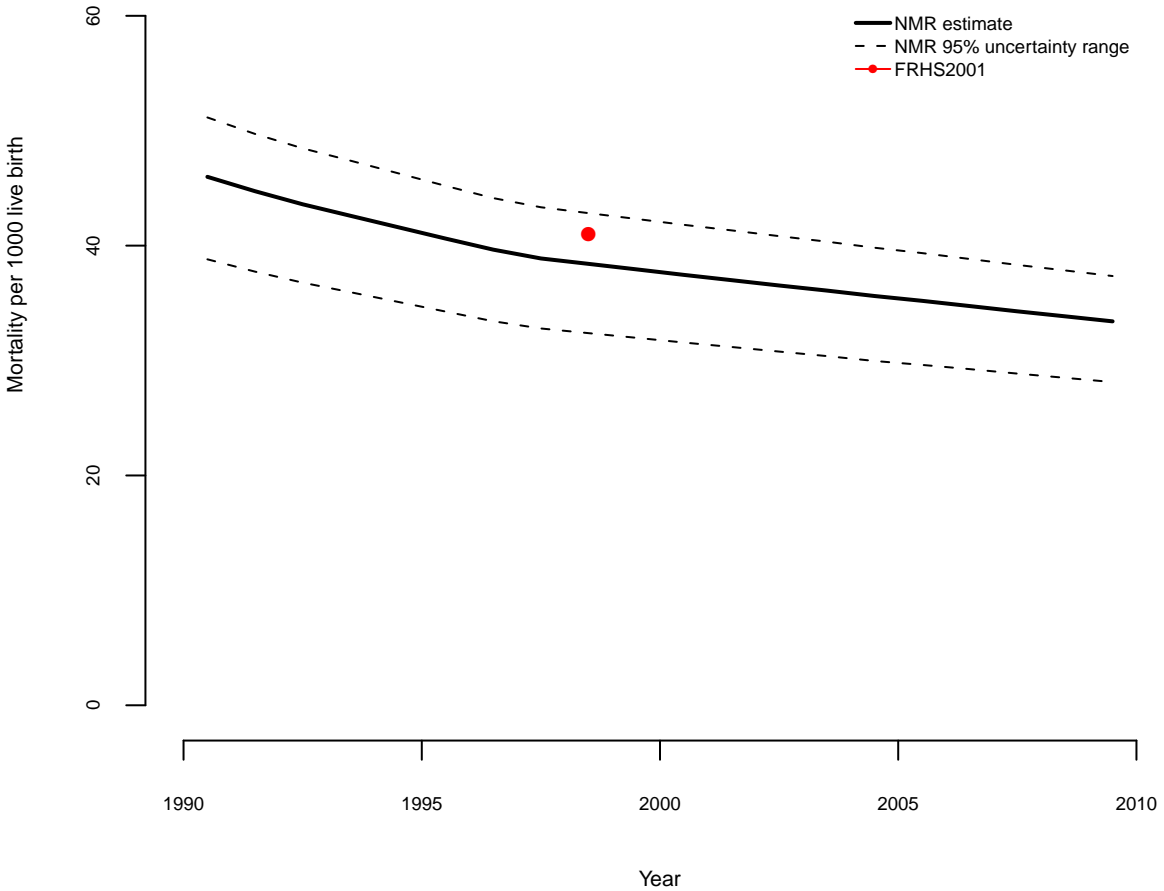

### Myanmar NMR and U5MR

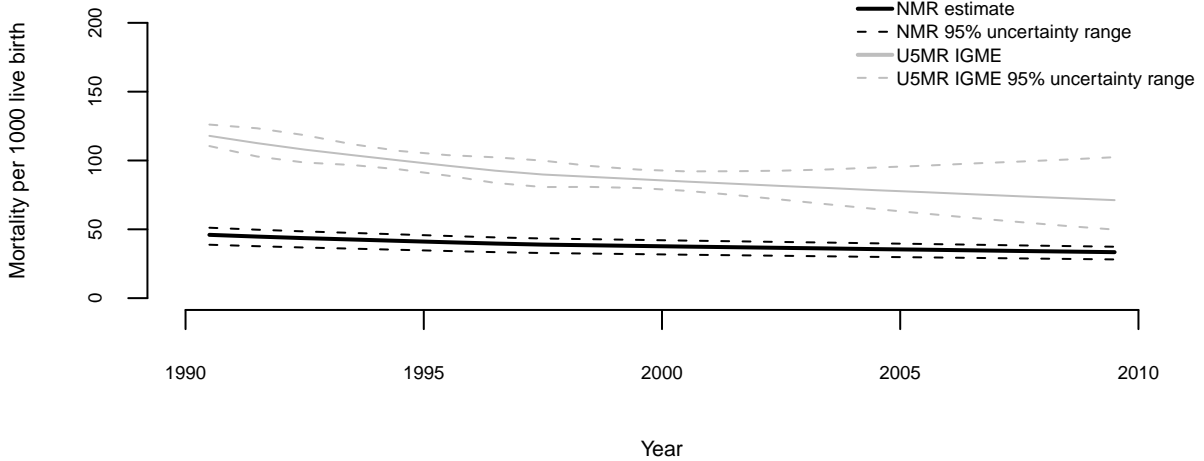

### Myanmar NMR as percentage of U5MR

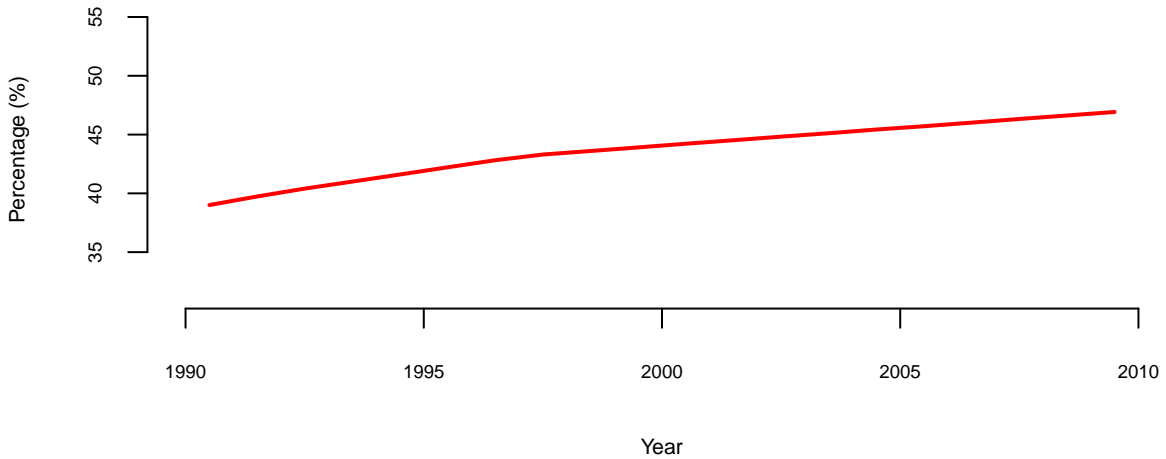

**Namibia**  
**Data, and estimated NMR**

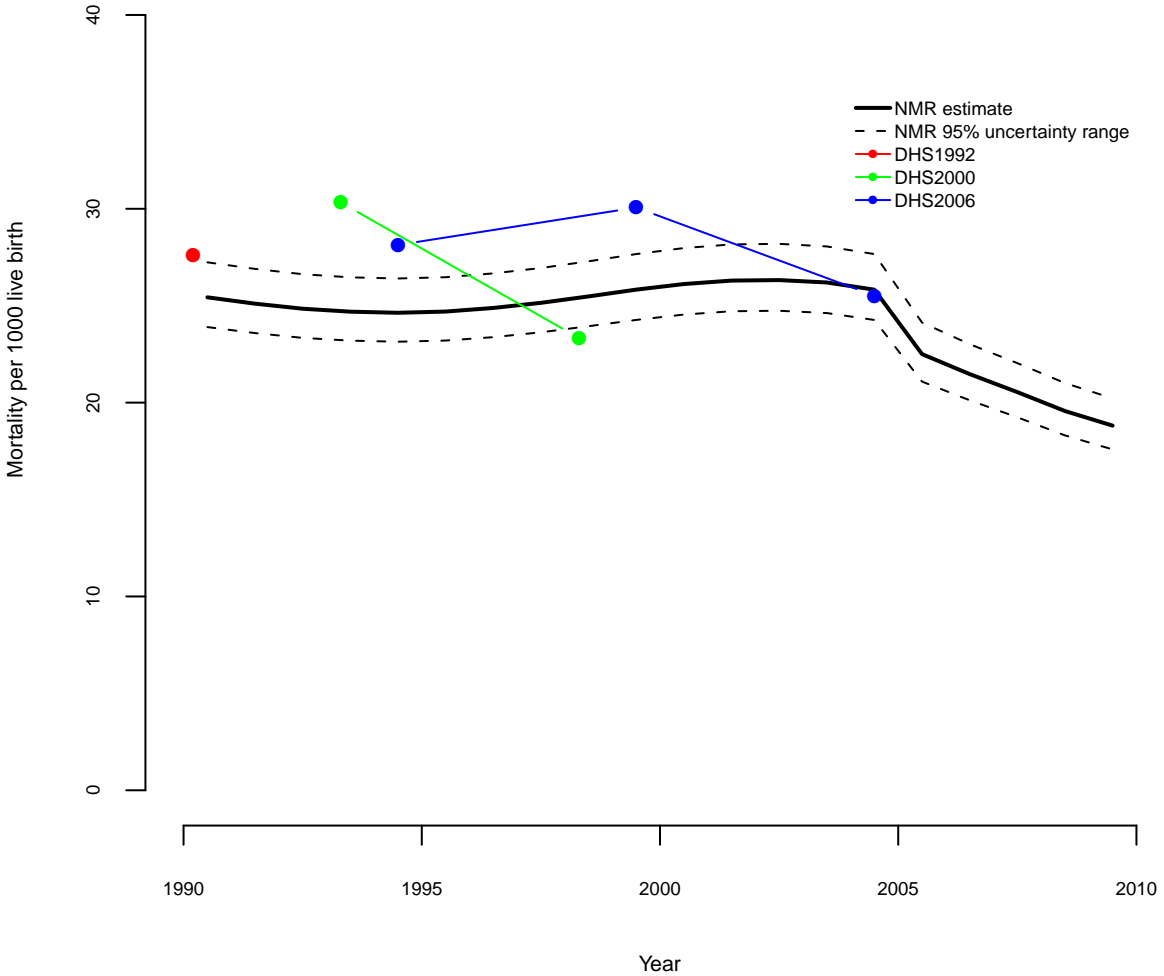

### Namibia NMR and U5MR

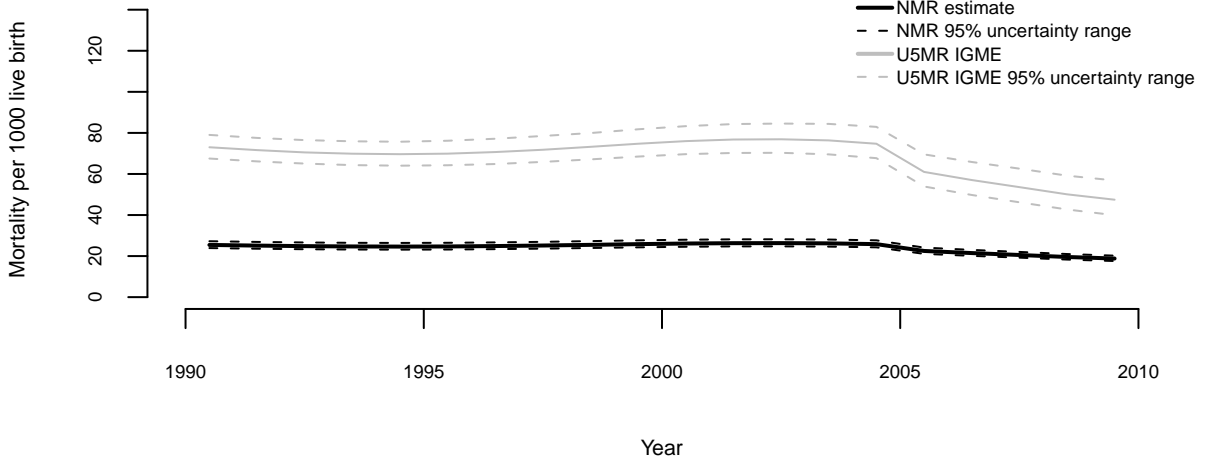

### Namibia NMR as percentage of U5MR

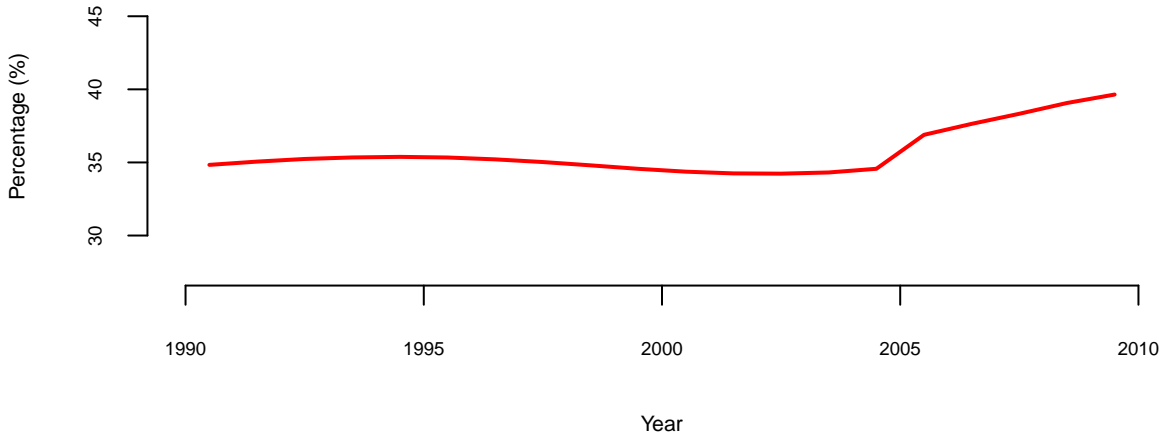

**Nauru**  
**Data, and estimated NMR**

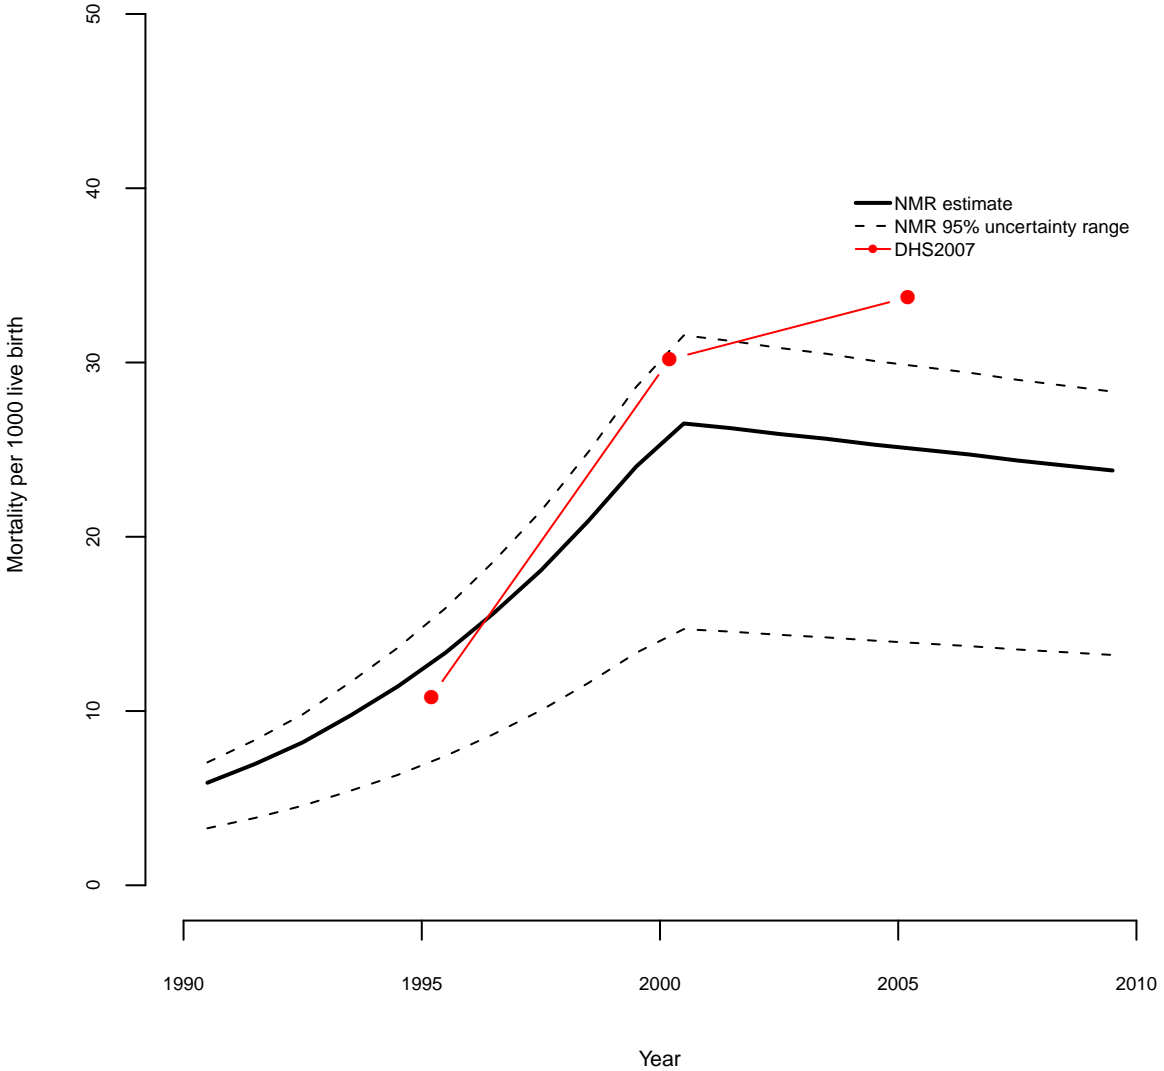

### Nauru NMR and U5MR

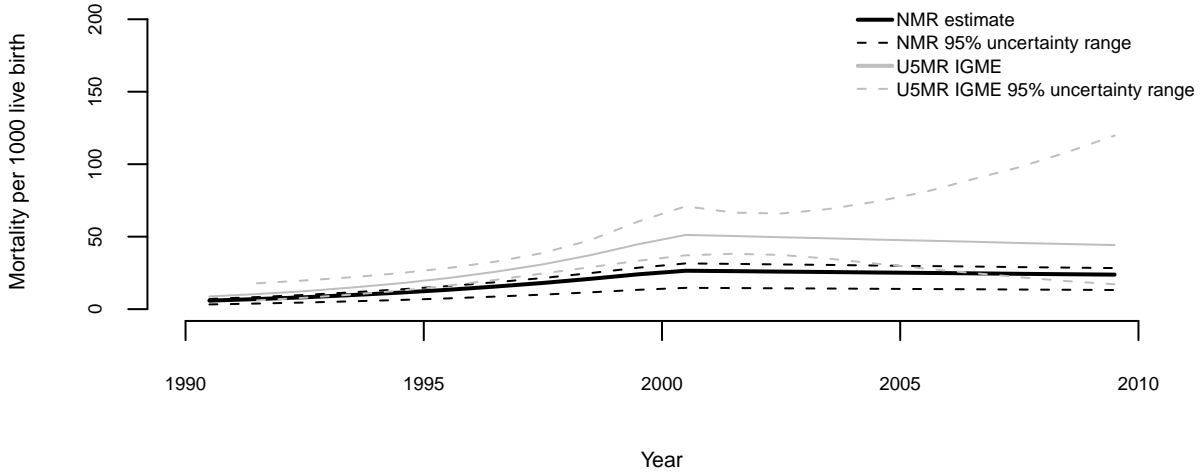

### Nauru NMR as percentage of U5MR

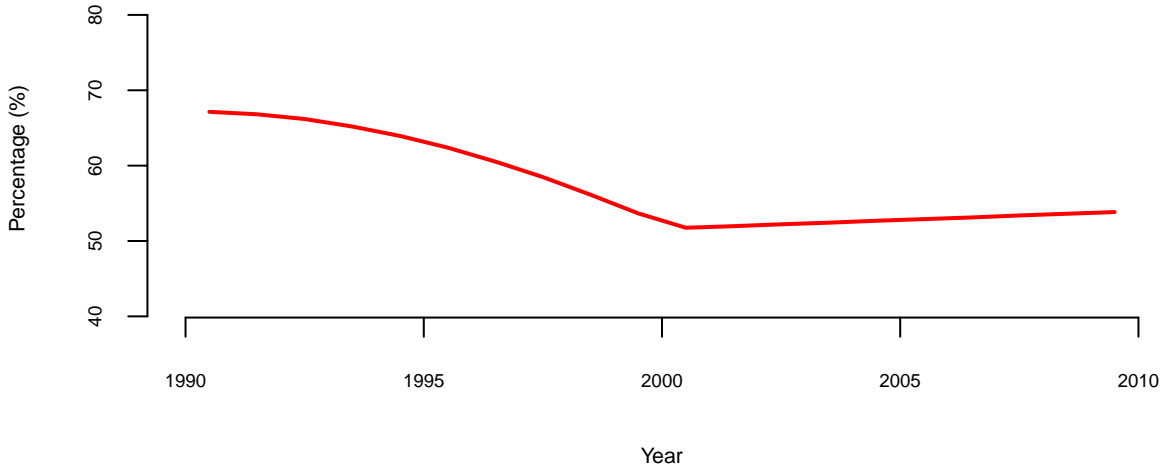

# Nepal

## Data, and estimated NMR

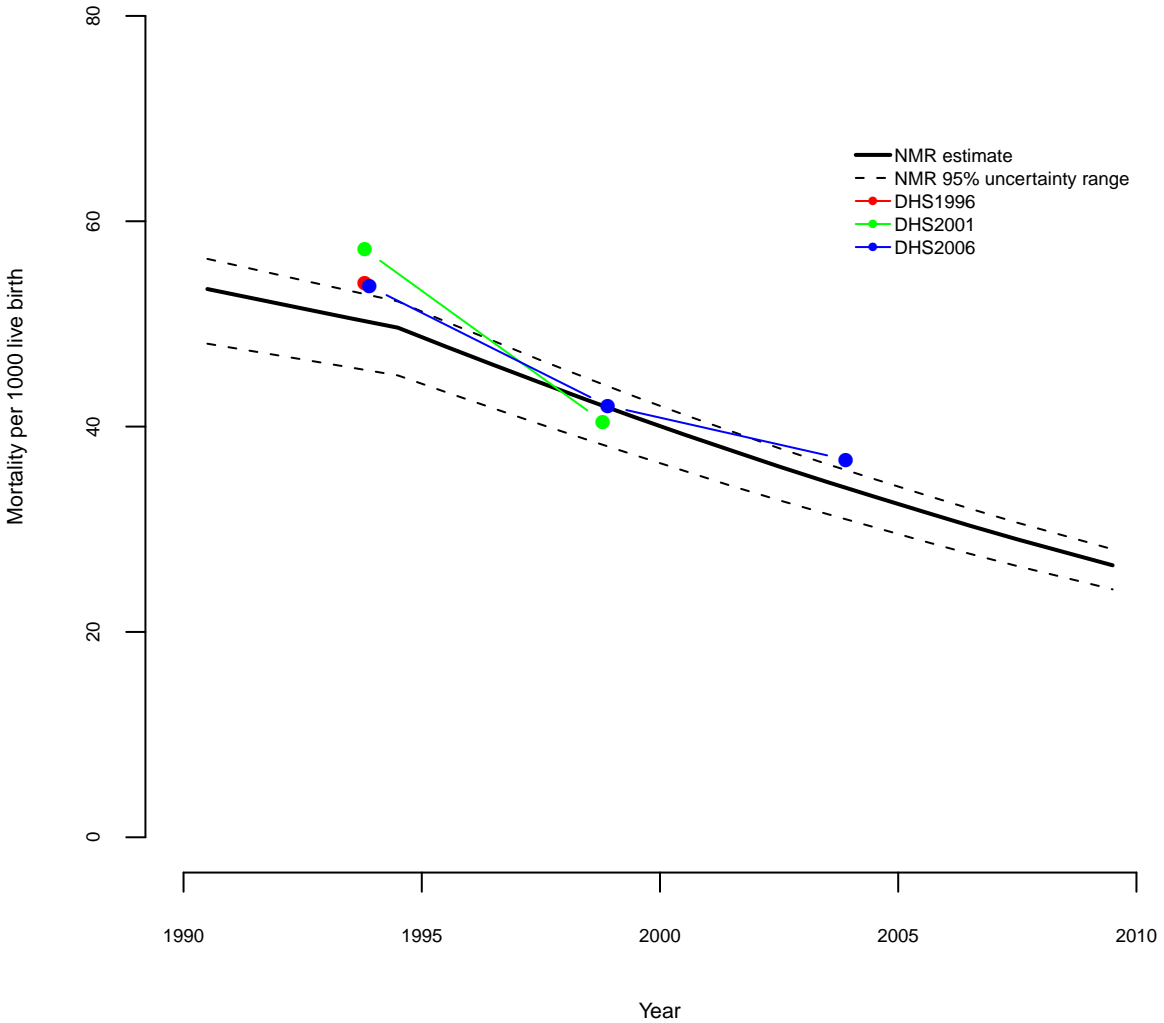

### Nepal NMR and U5MR

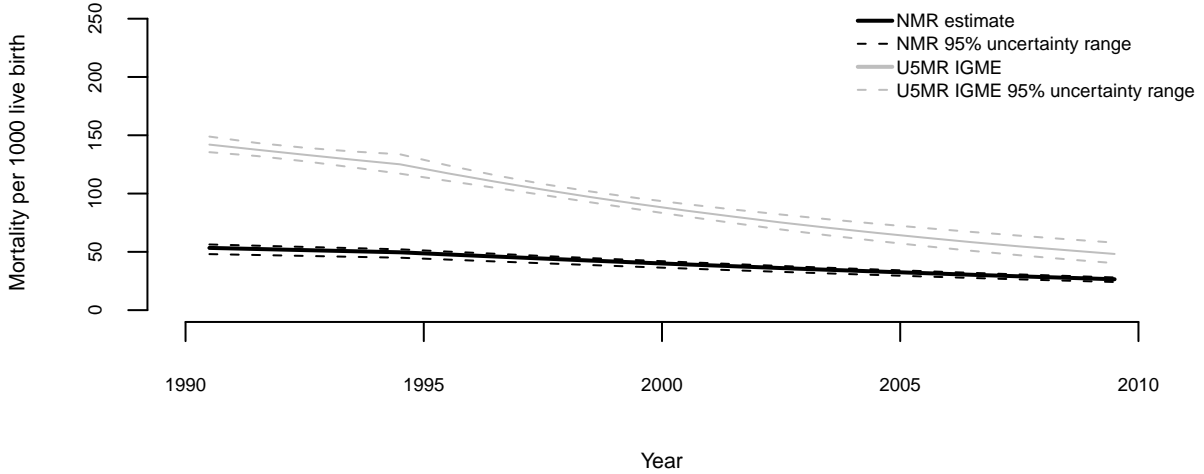

### Nepal NMR as percentage of U5MR

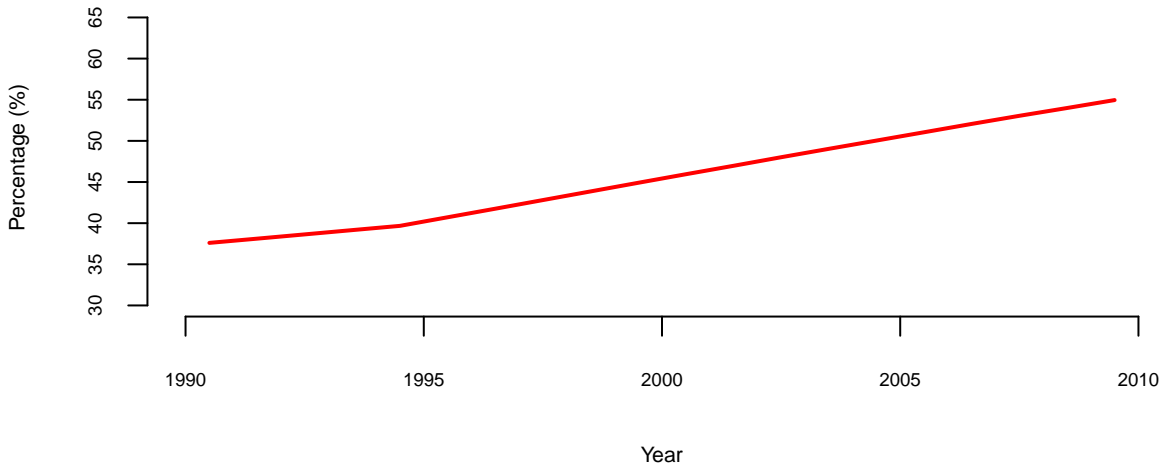



**Netherlands**  
**Data, and estimated NMR**

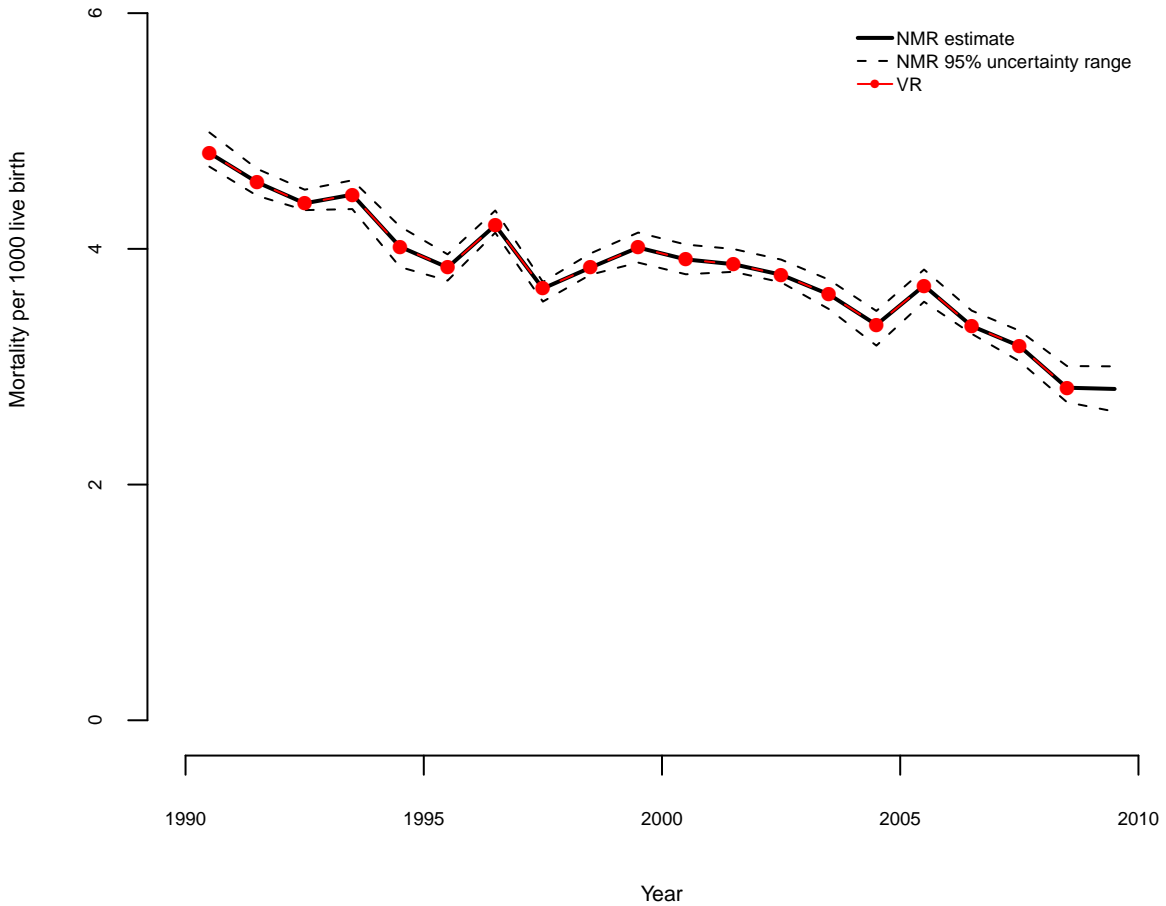

### Netherlands NMR and U5MR

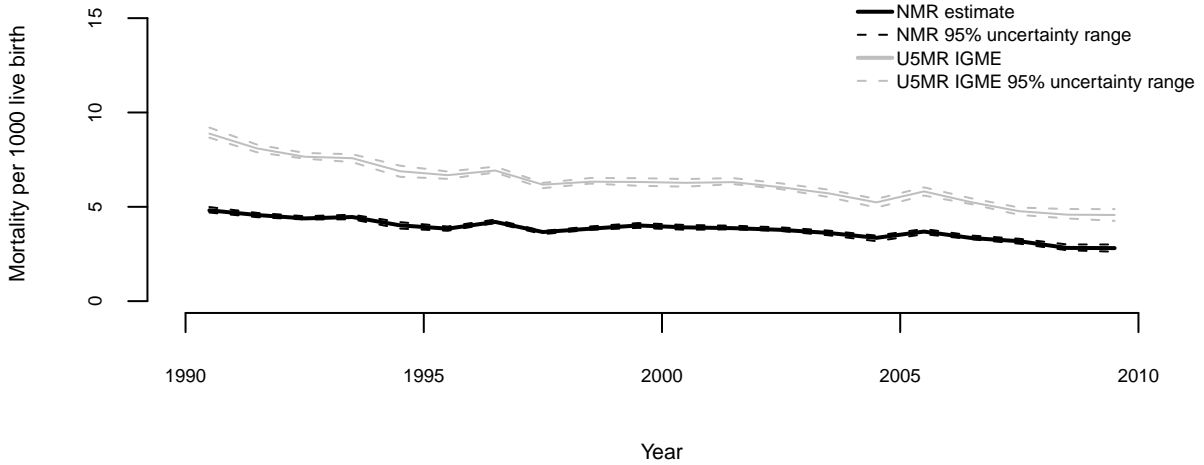

### Netherlands NMR as percentage of U5MR

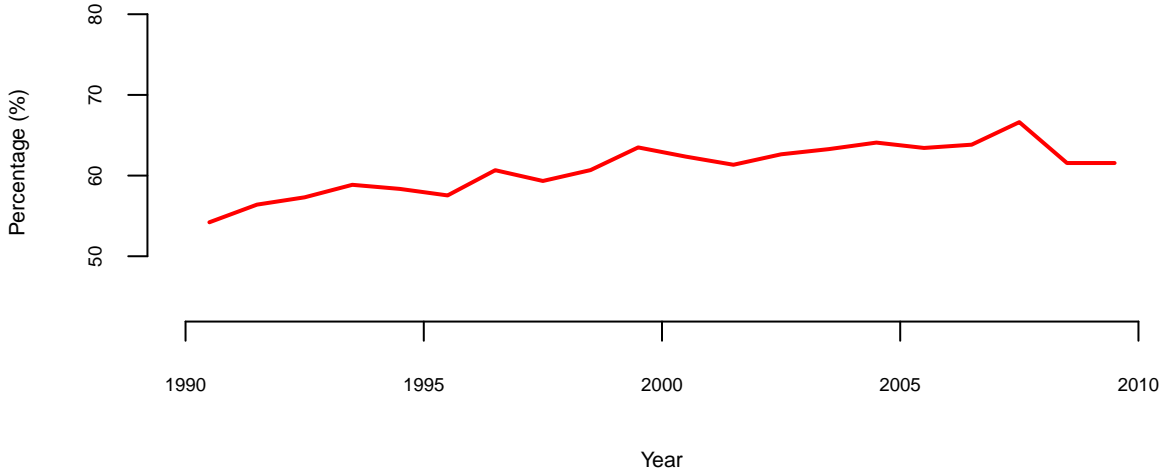

### New Zealand Data, and estimated NMR

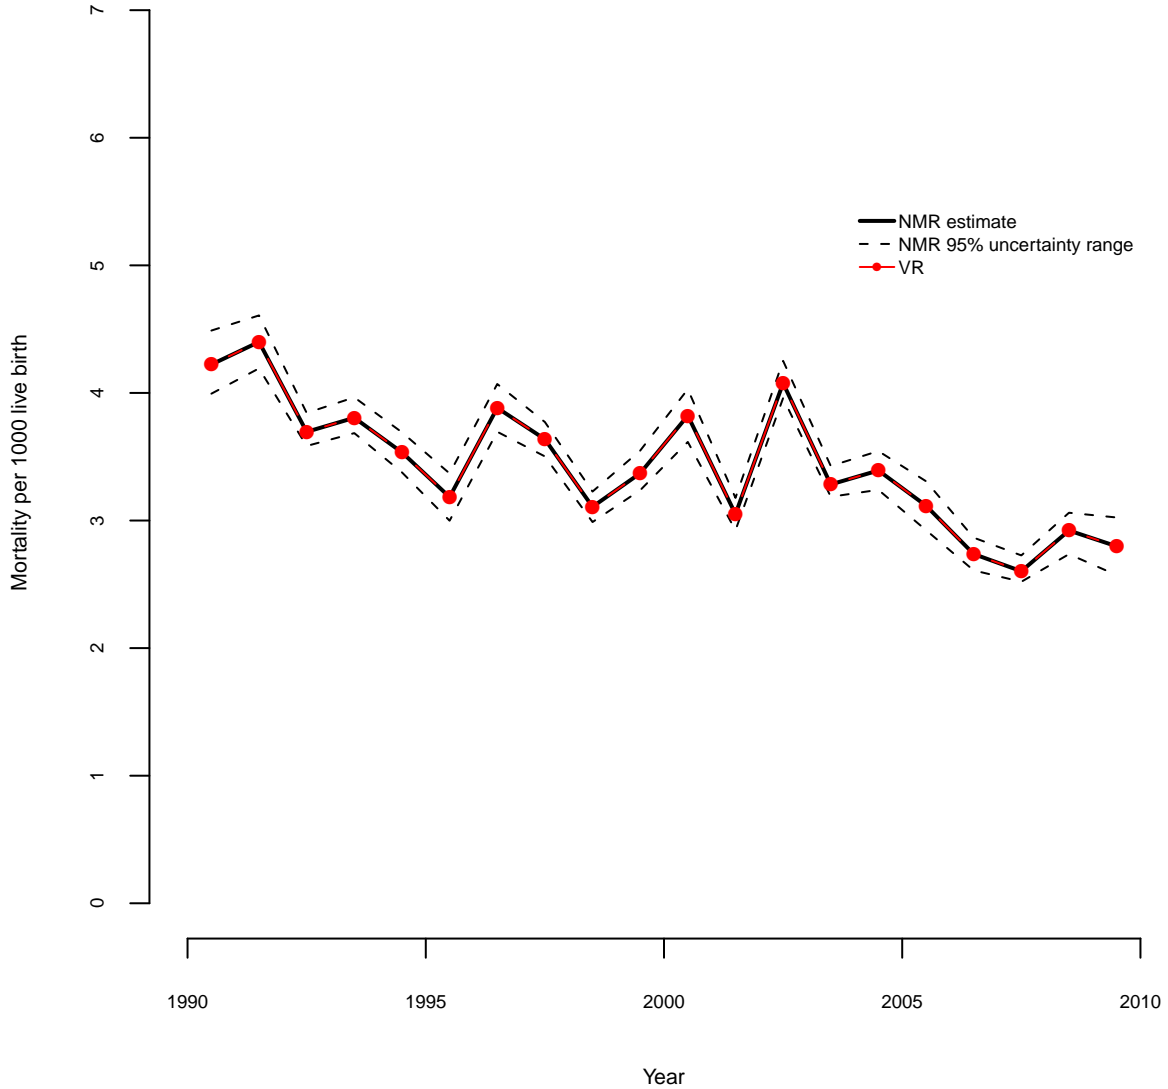

### New Zealand NMR and U5MR

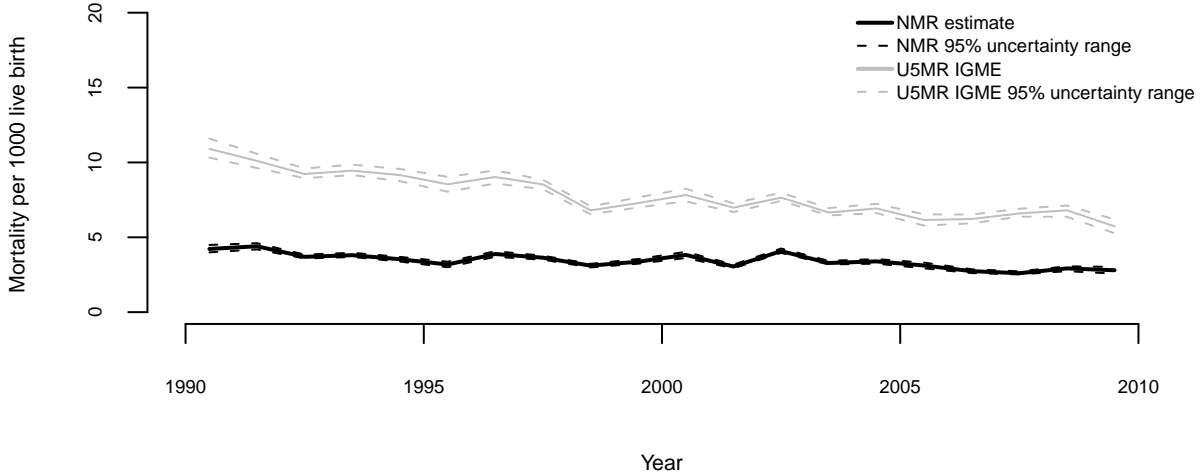

### New Zealand NMR as percentage of U5MR

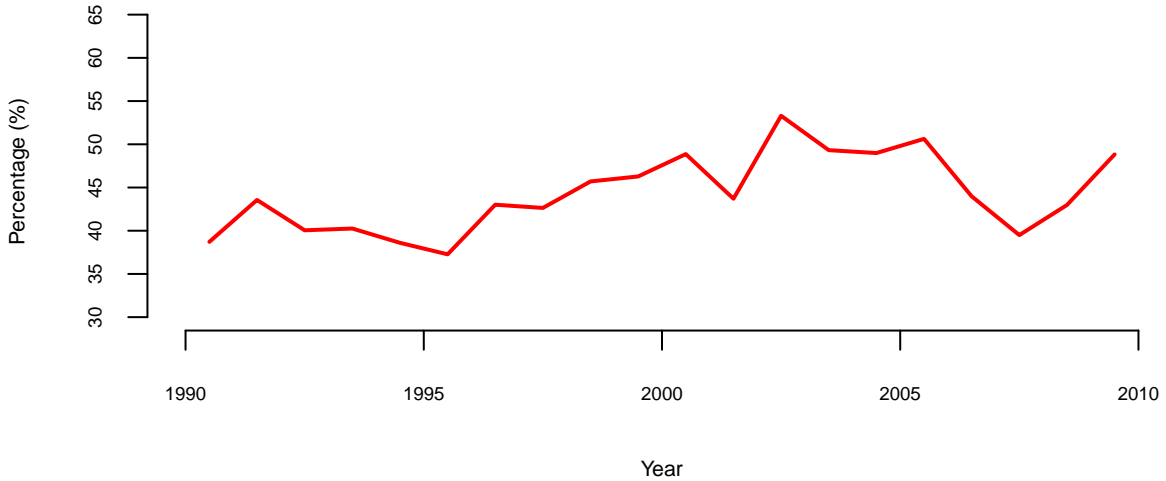

# Nicaragua

## Data, and estimated NMR

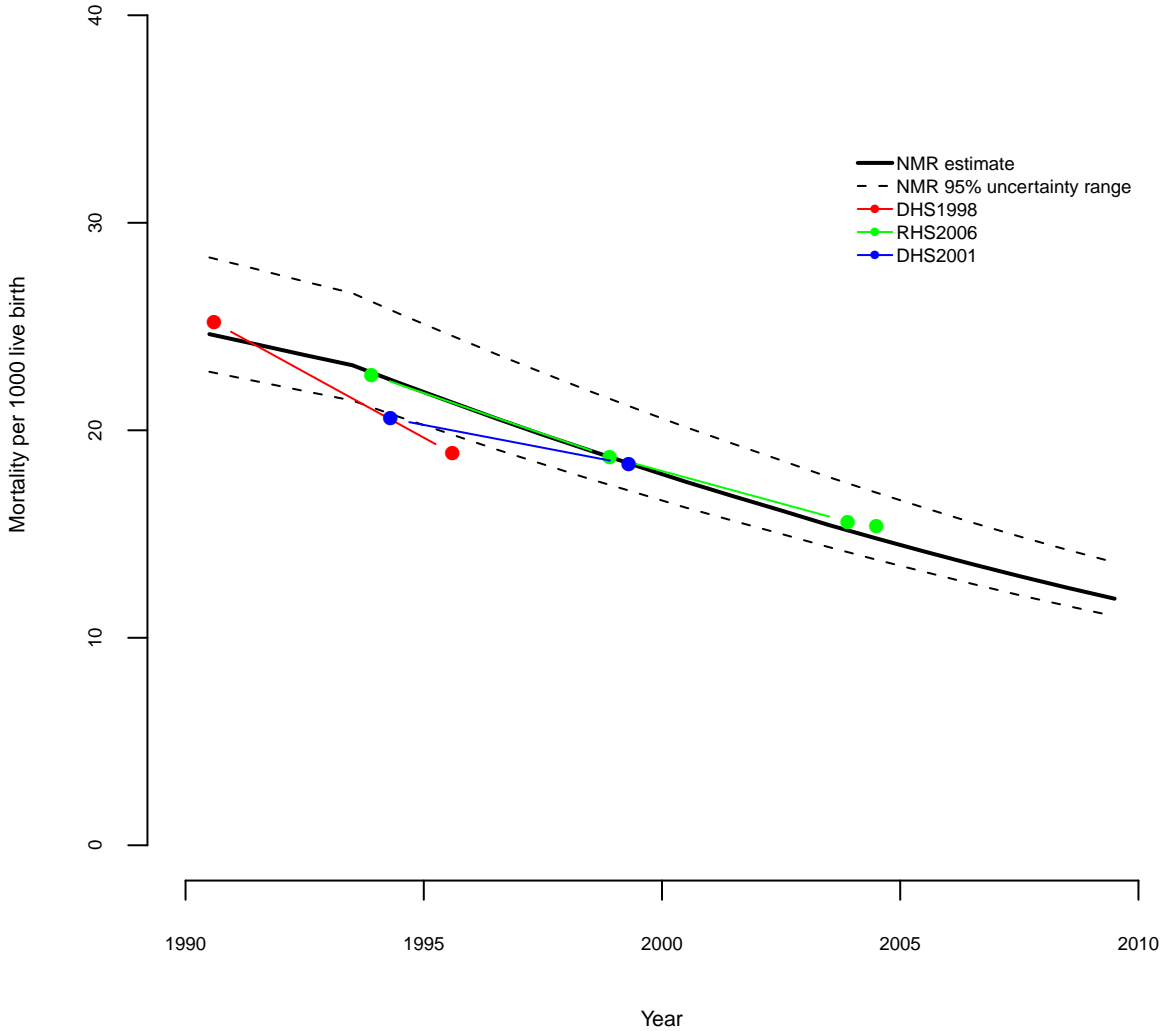

### Nicaragua NMR and U5MR

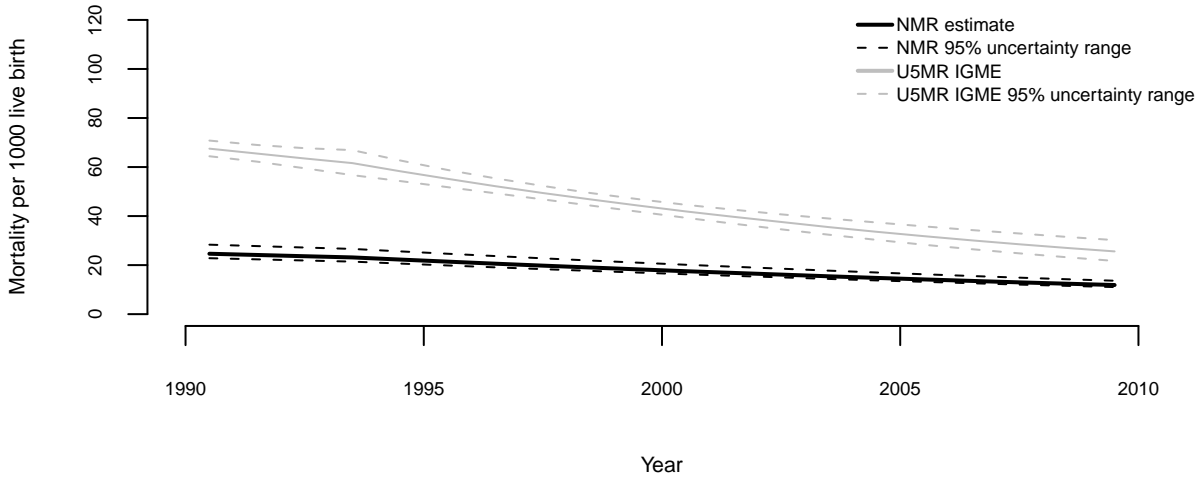

### Nicaragua NMR as percentage of U5MR

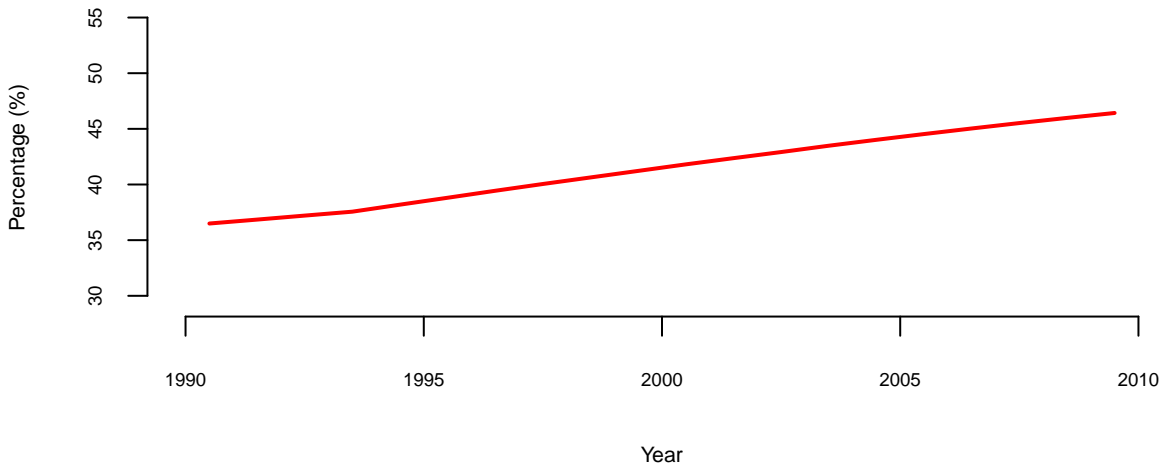

# Niger

## Data, and estimated NMR

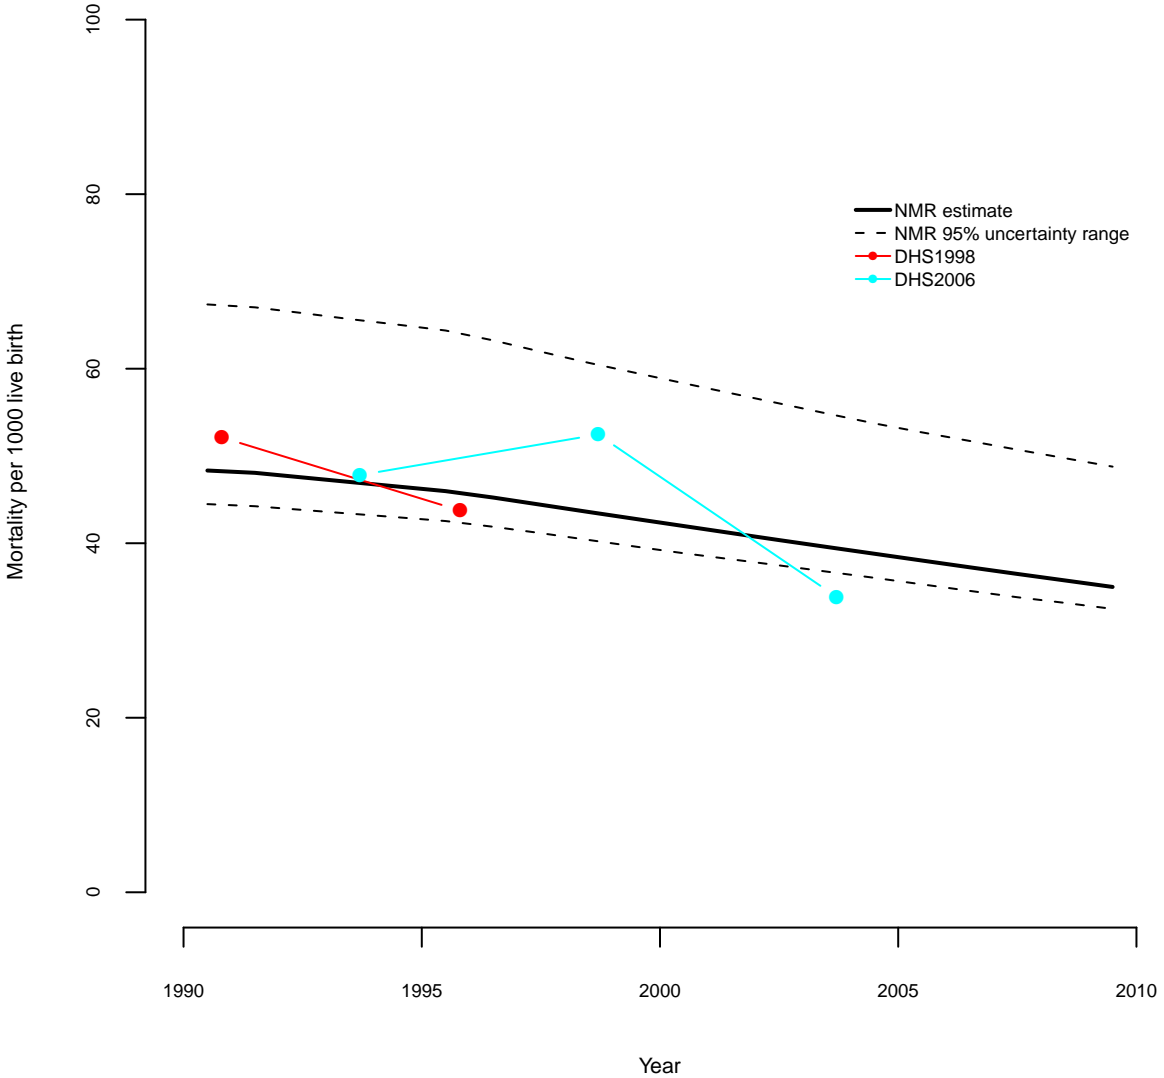

### Niger NMR and U5MR

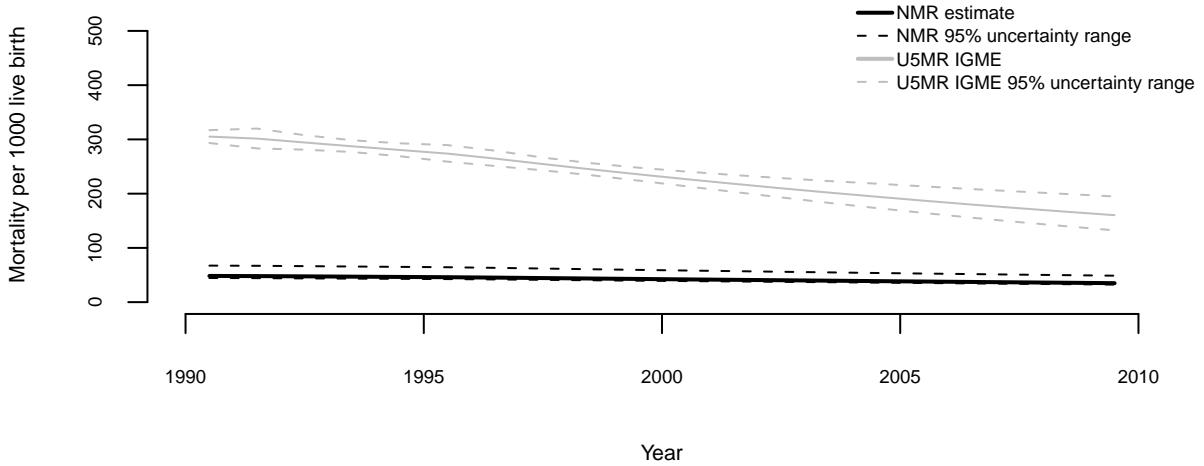

### Niger NMR as percentage of U5MR

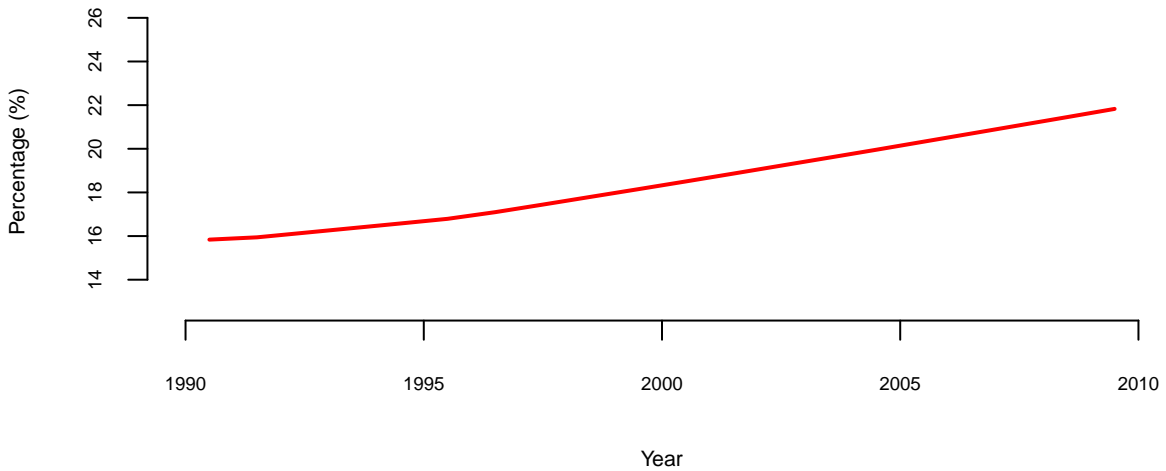



# Nigeria

## Data, and estimated NMR

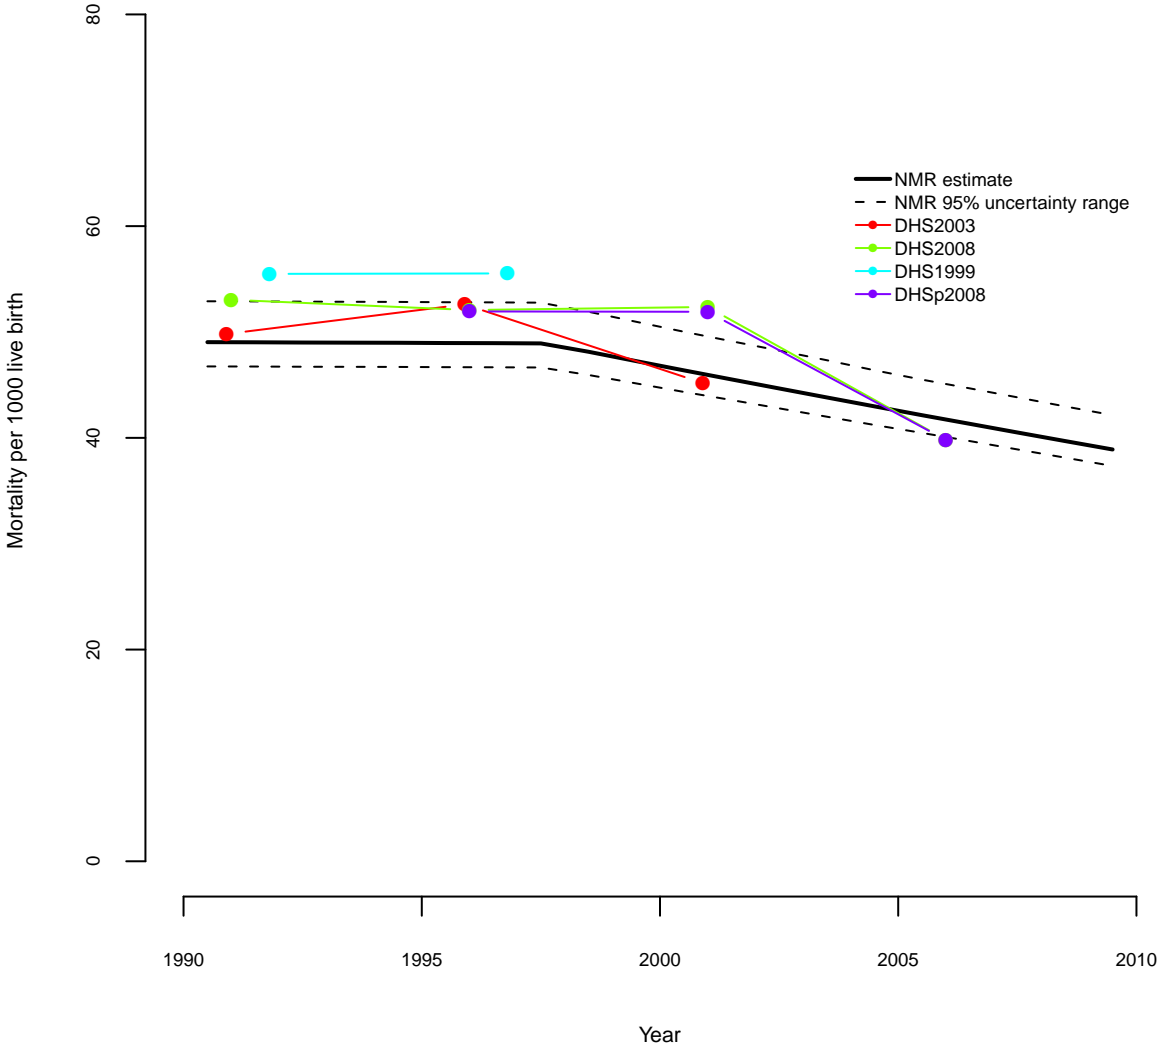

### Nigeria NMR and U5MR

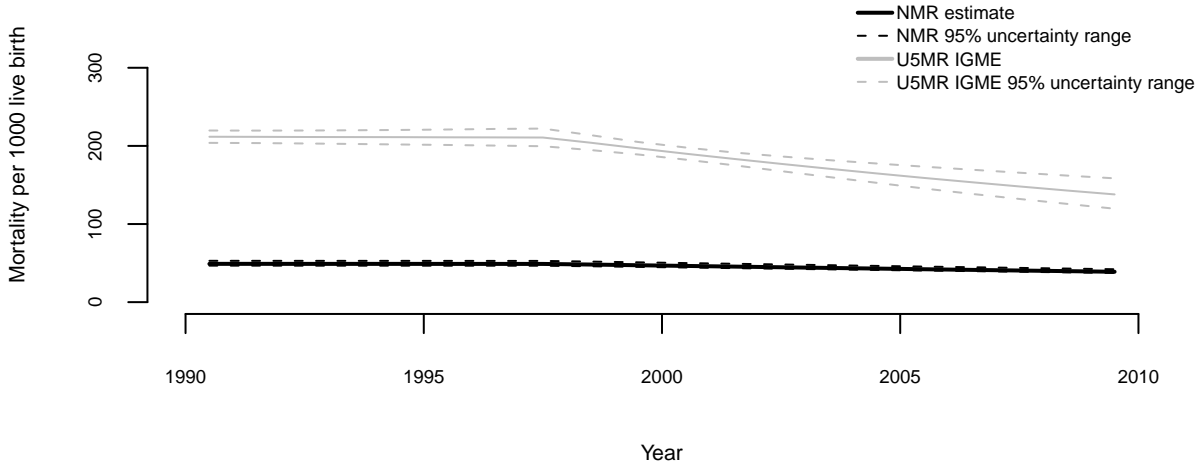

### Nigeria NMR as percentage of U5MR

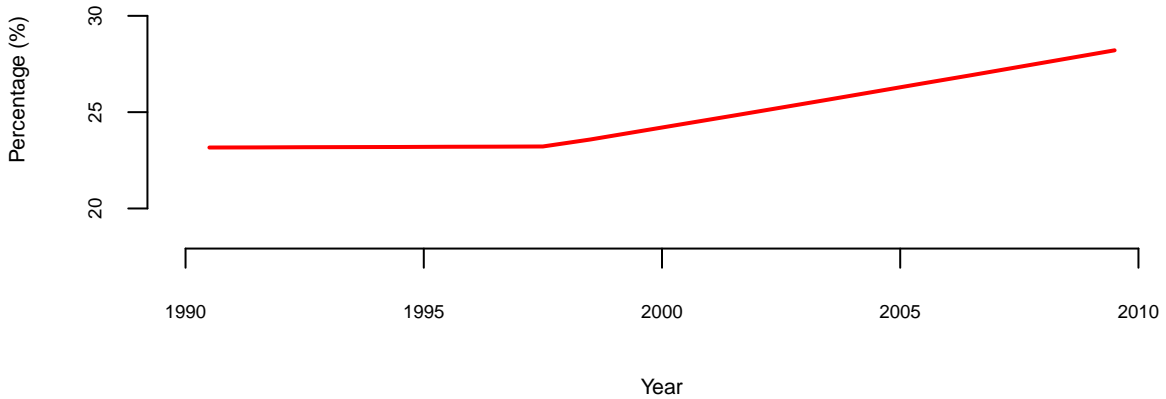

Niue  
Data, and estimated NMR

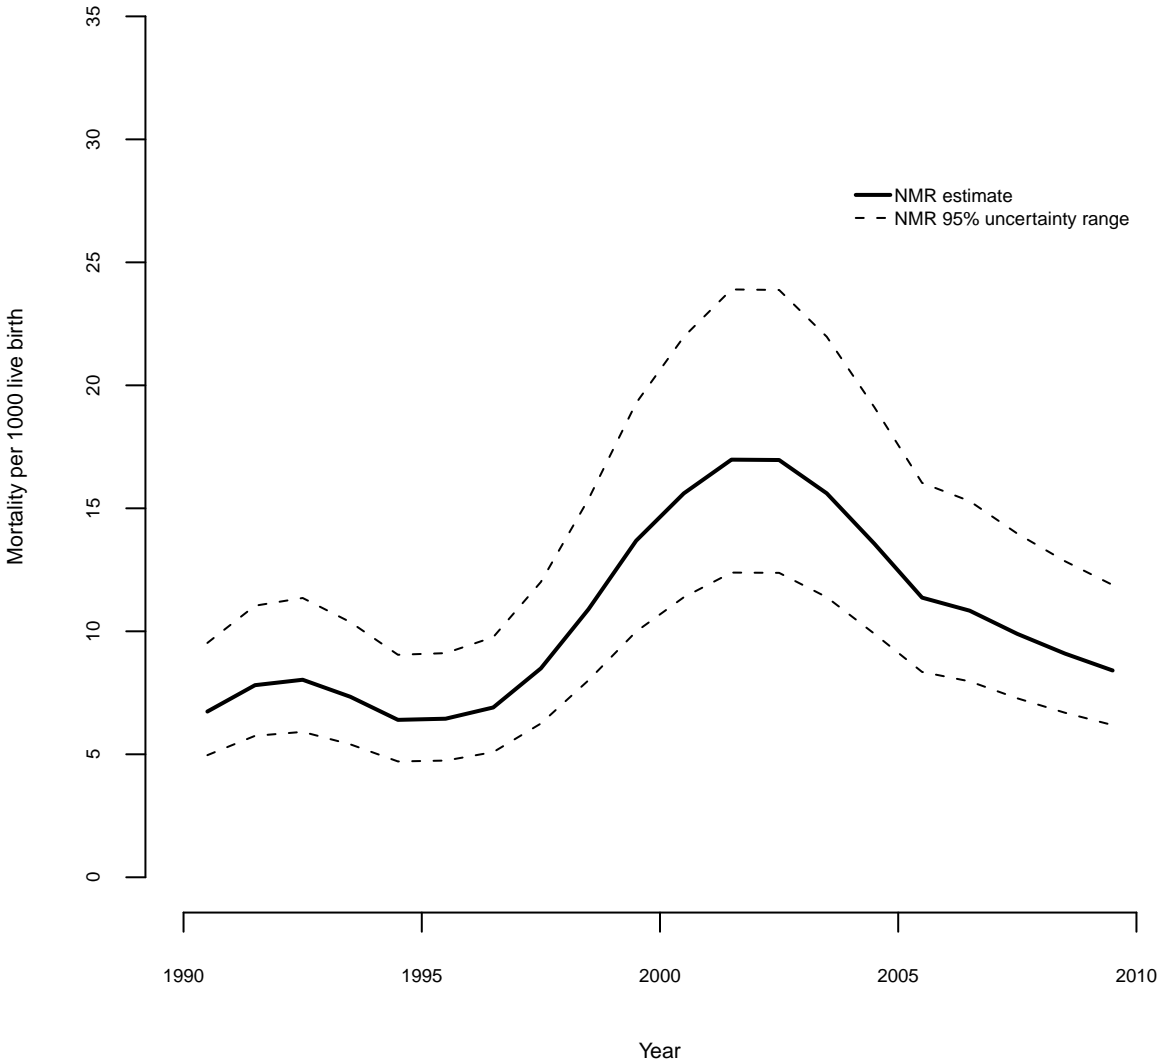

### Niue NMR and U5MR

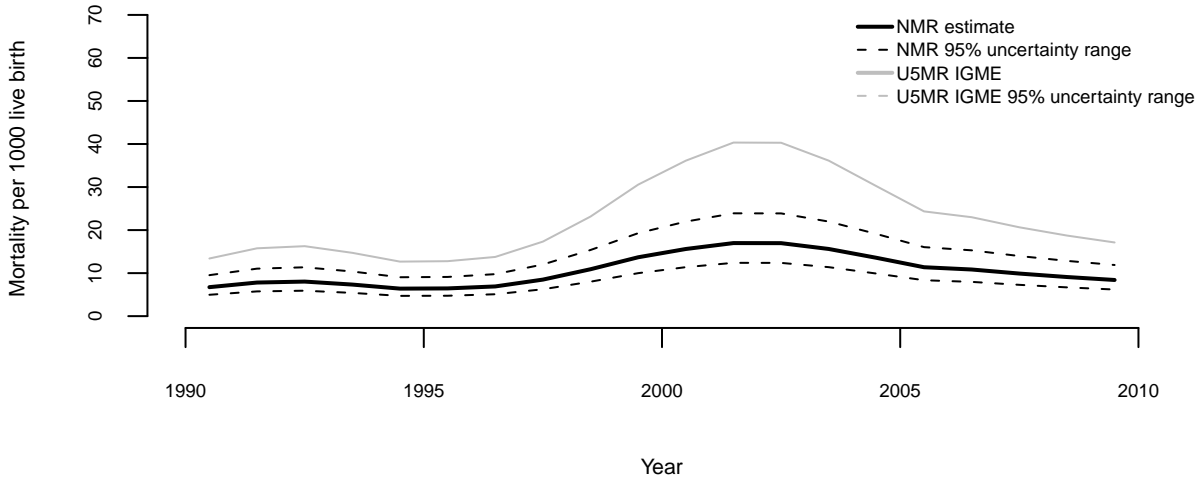

### Niue NMR as percentage of U5MR

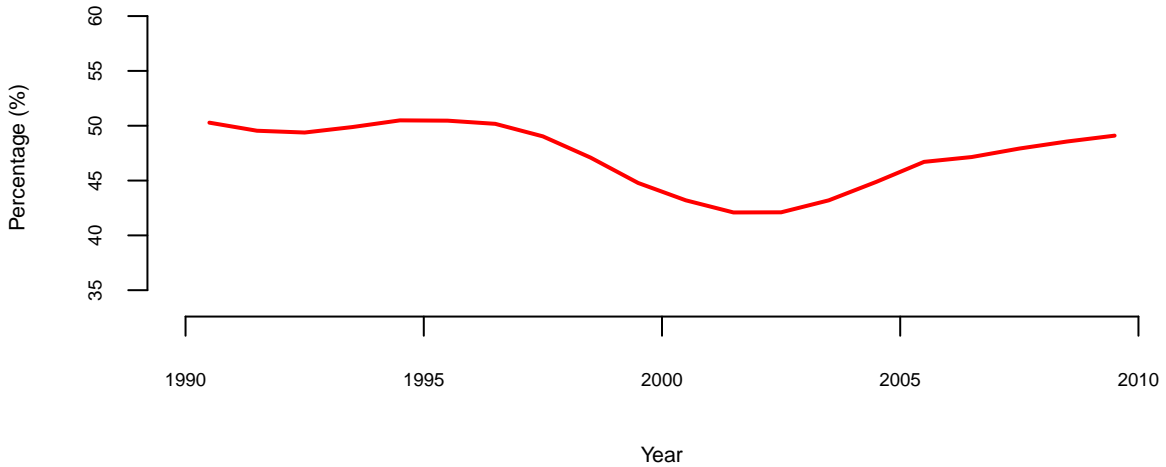

# Norway

## Data, and estimated NMR

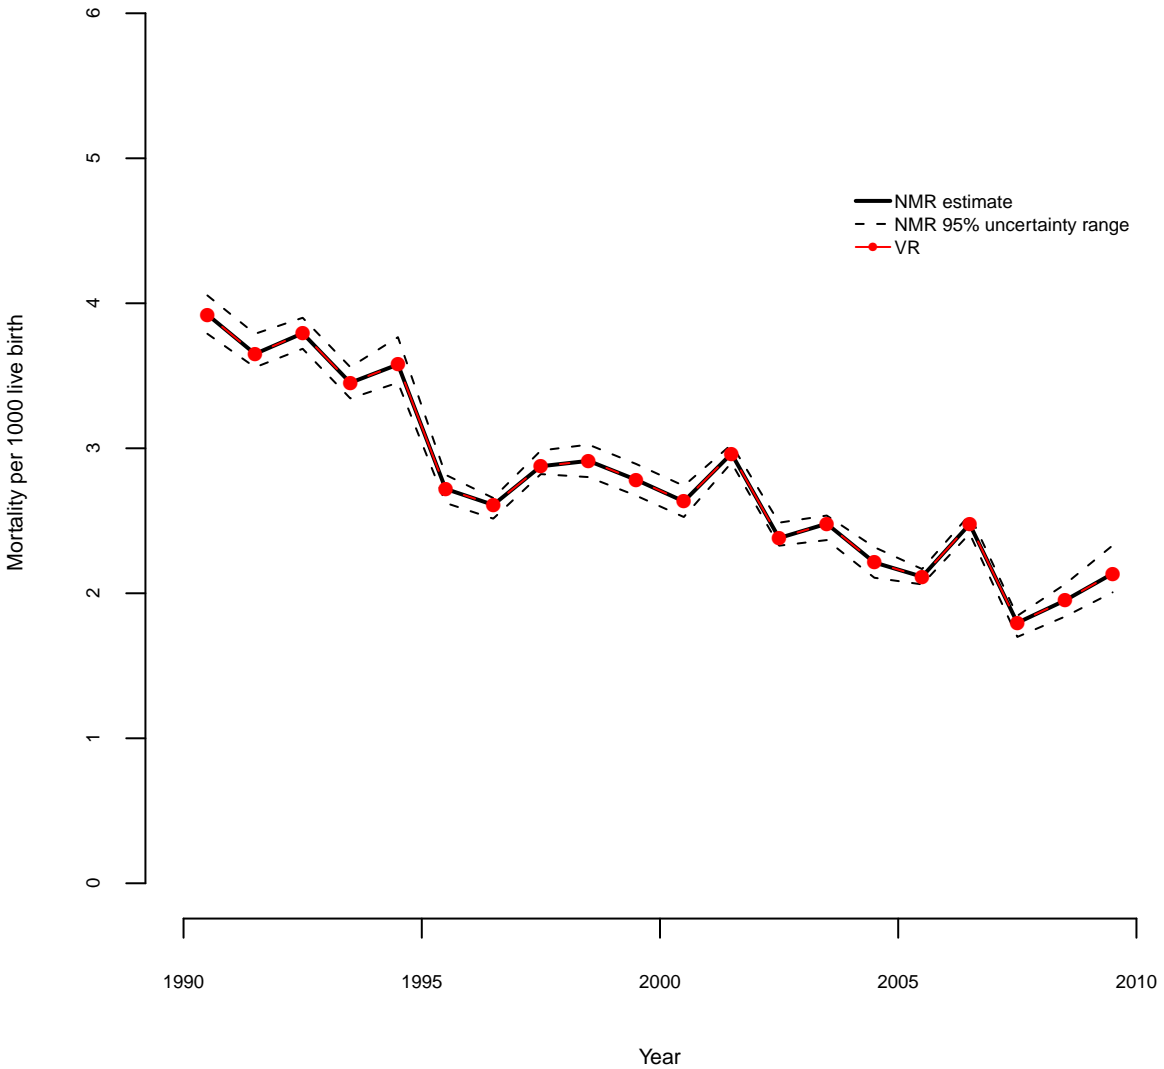

### Norway NMR and U5MR

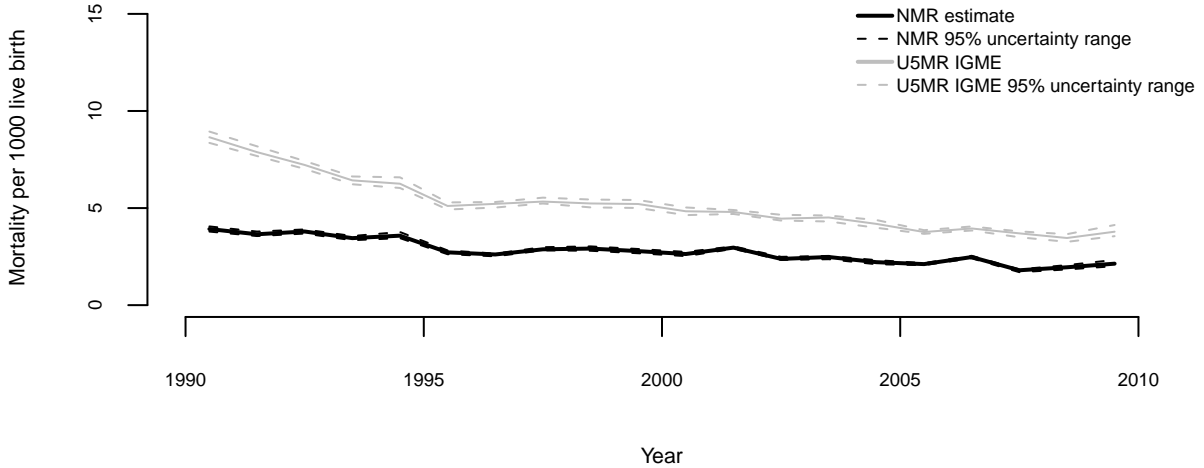

### Norway NMR as percentage of U5MR

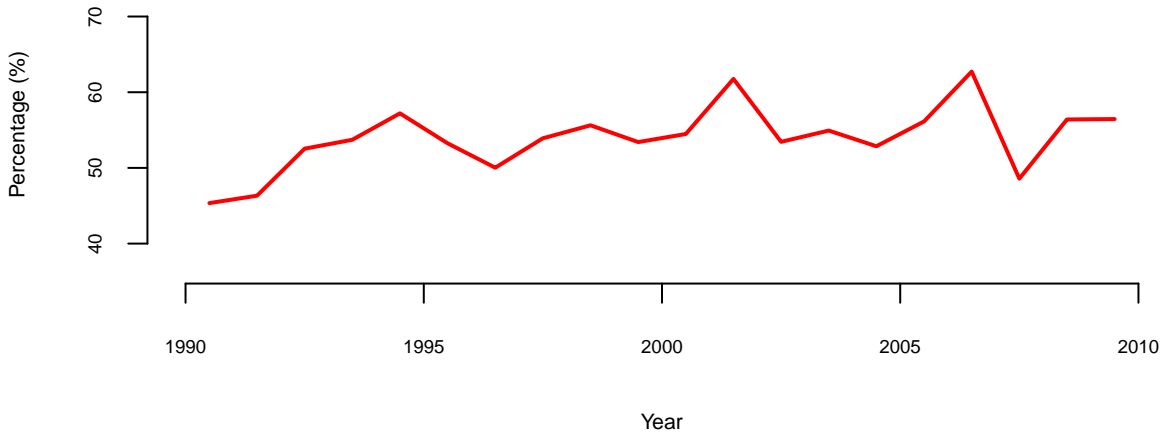

Oman  
Data, and estimated NMR

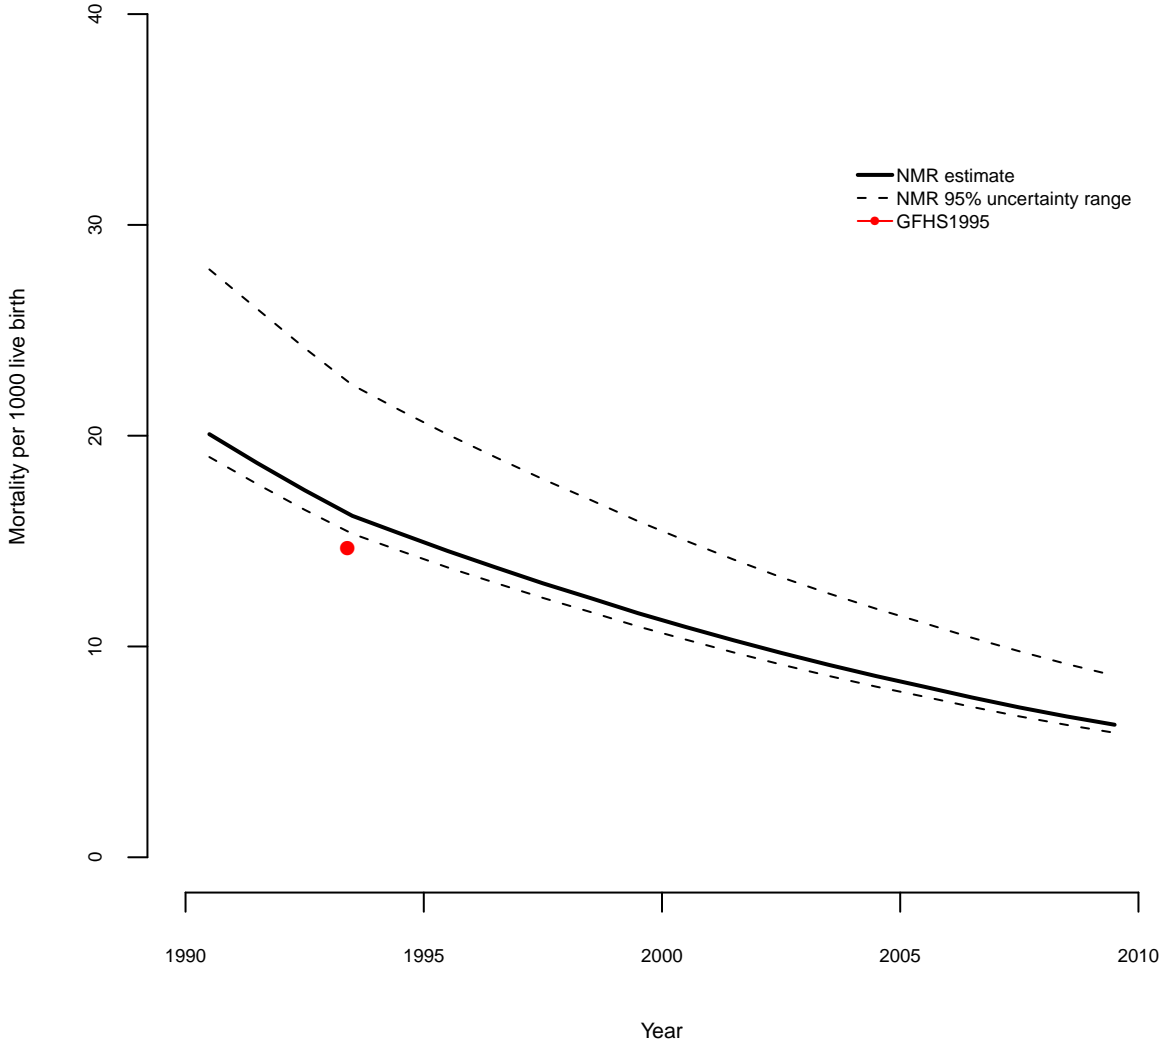

### Oman NMR and U5MR

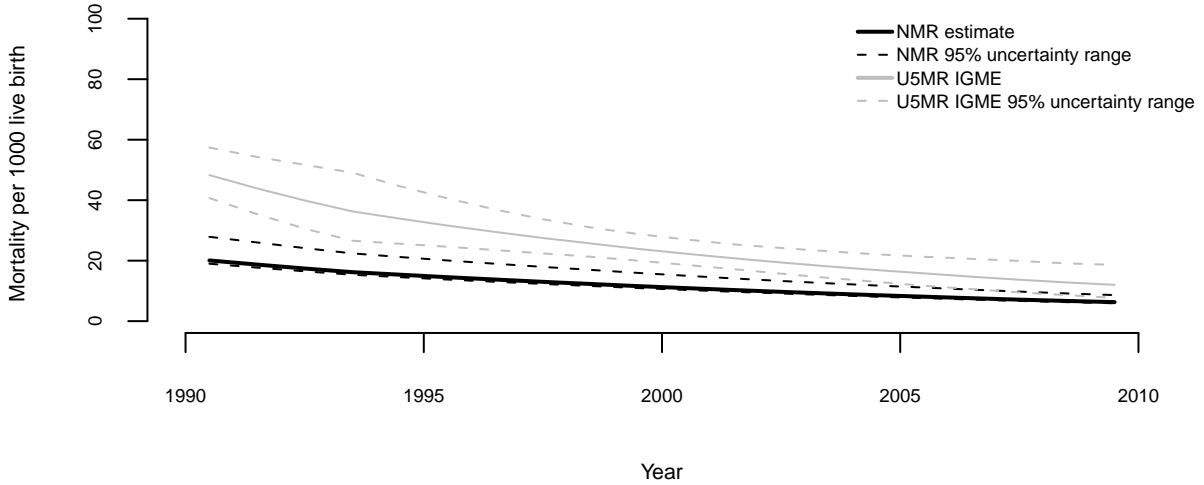

### Oman NMR as percentage of U5MR

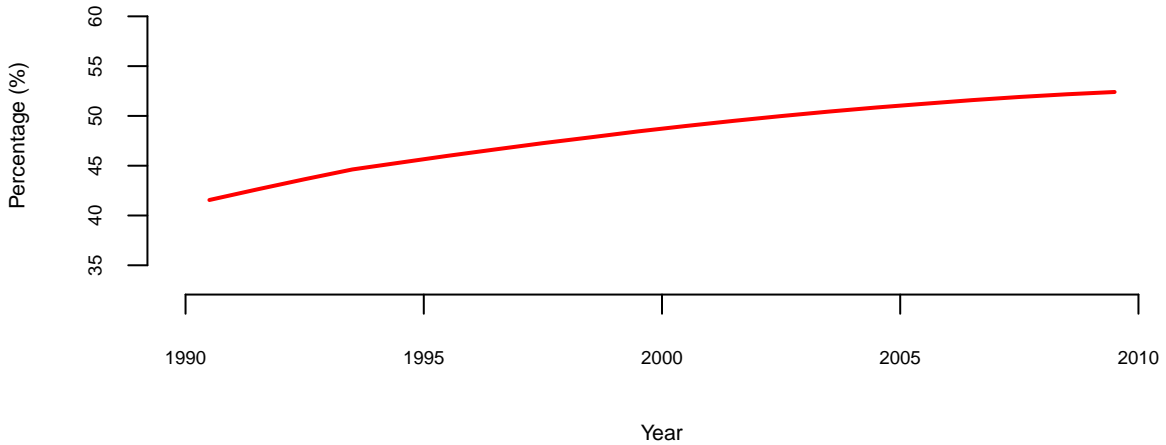



**Pakistan**  
**Data, and estimated NMR**

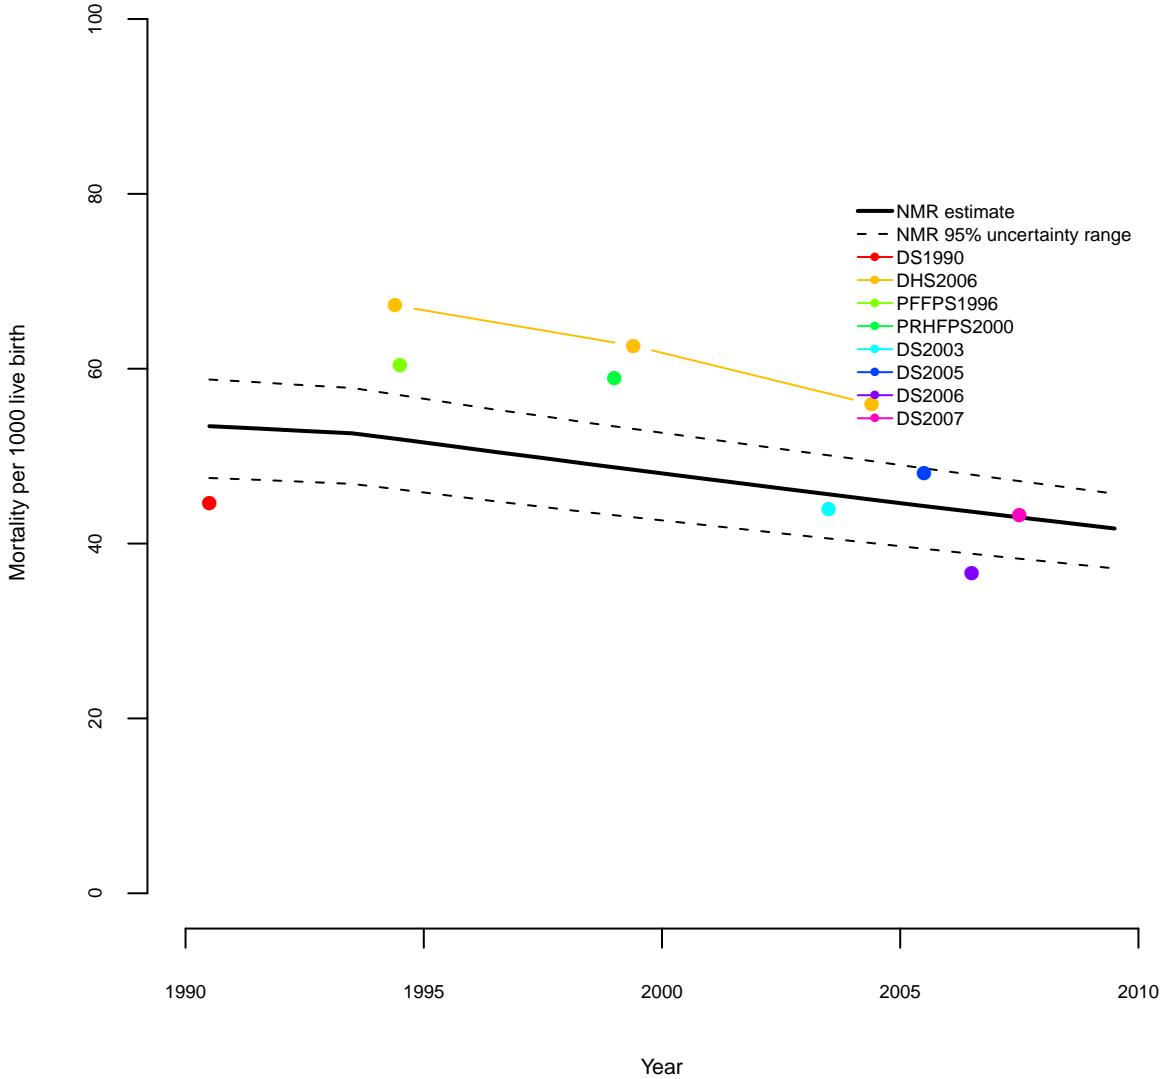

### Pakistan NMR and U5MR

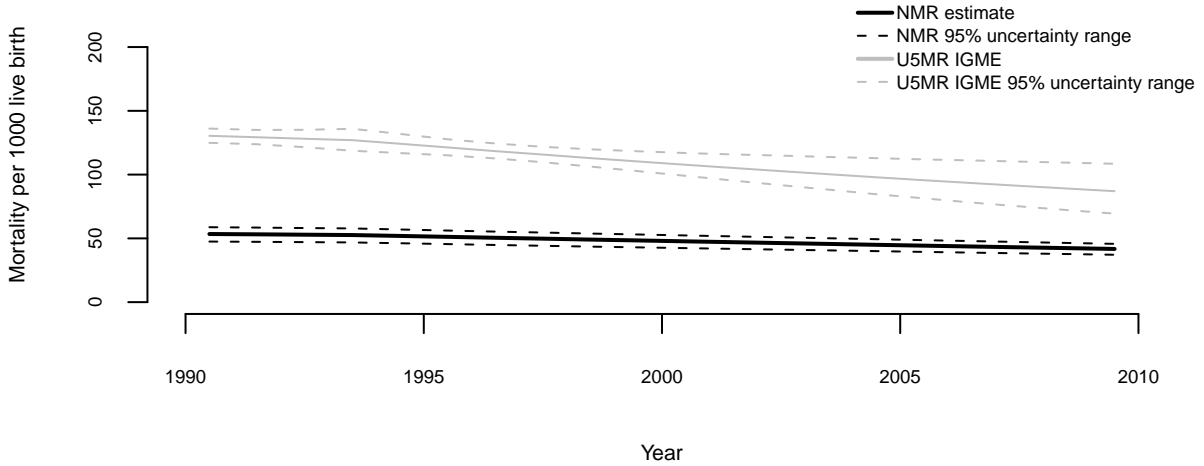

### Pakistan NMR as percentage of U5MR

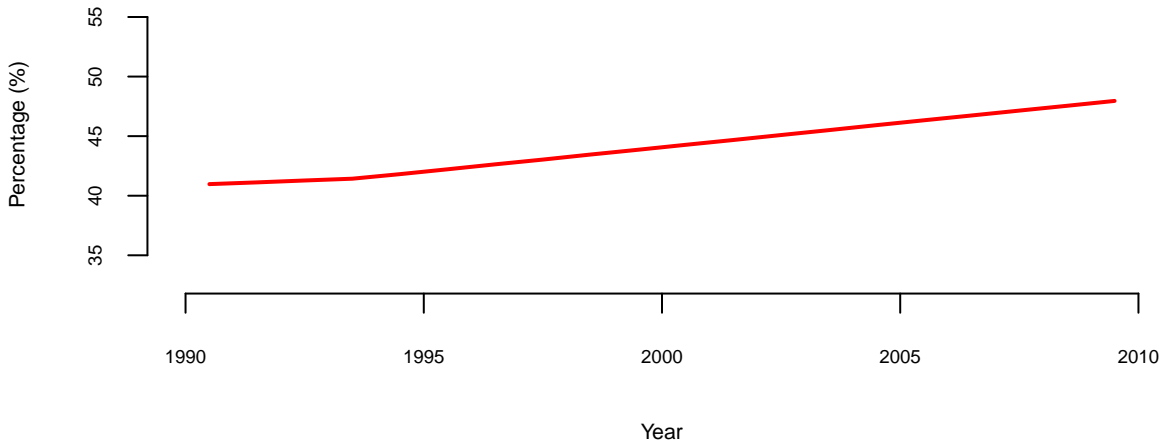

Palau  
Data, and estimated NMR

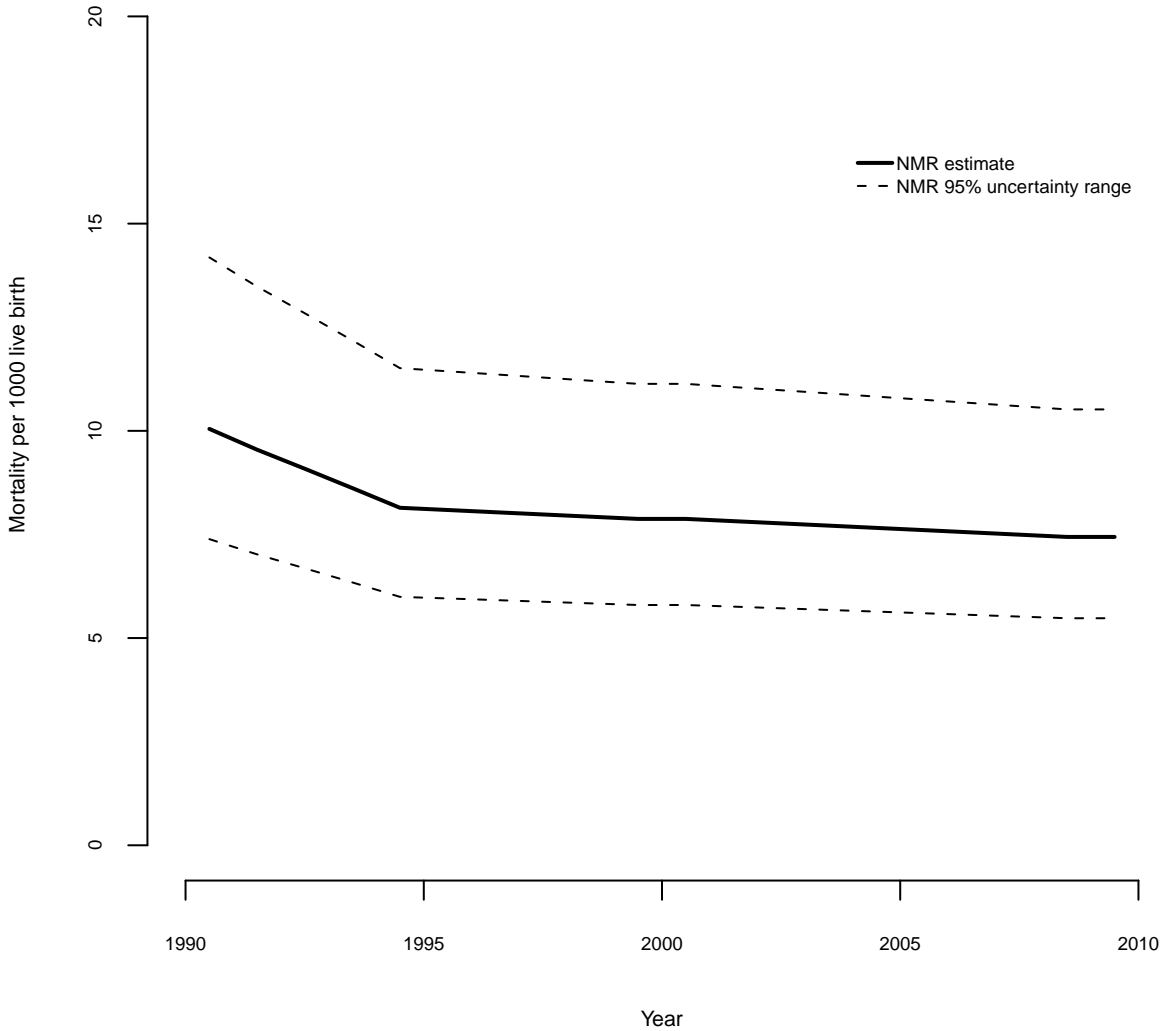

### Palau NMR and U5MR

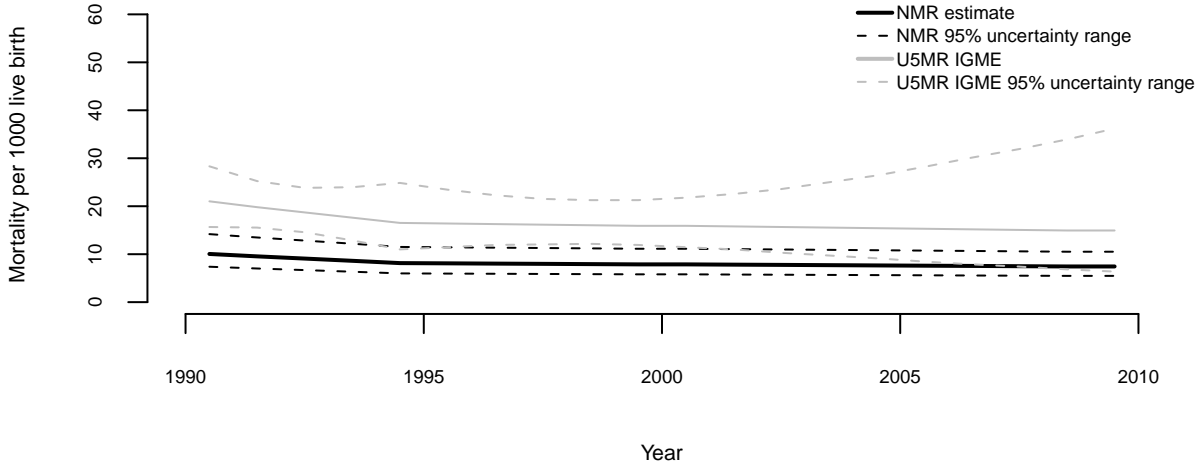

### Palau NMR as percentage of U5MR

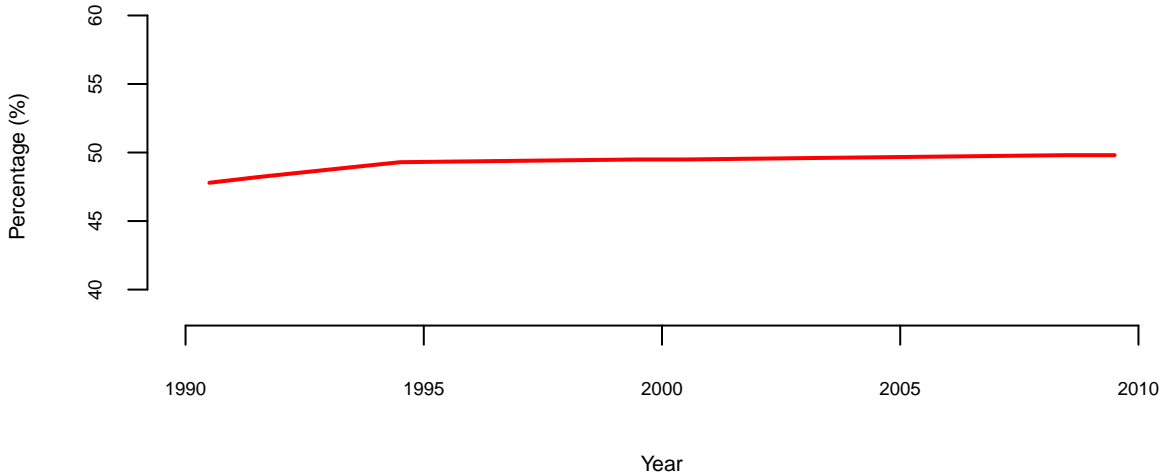

**Panama**  
**Data, and estimated NMR**

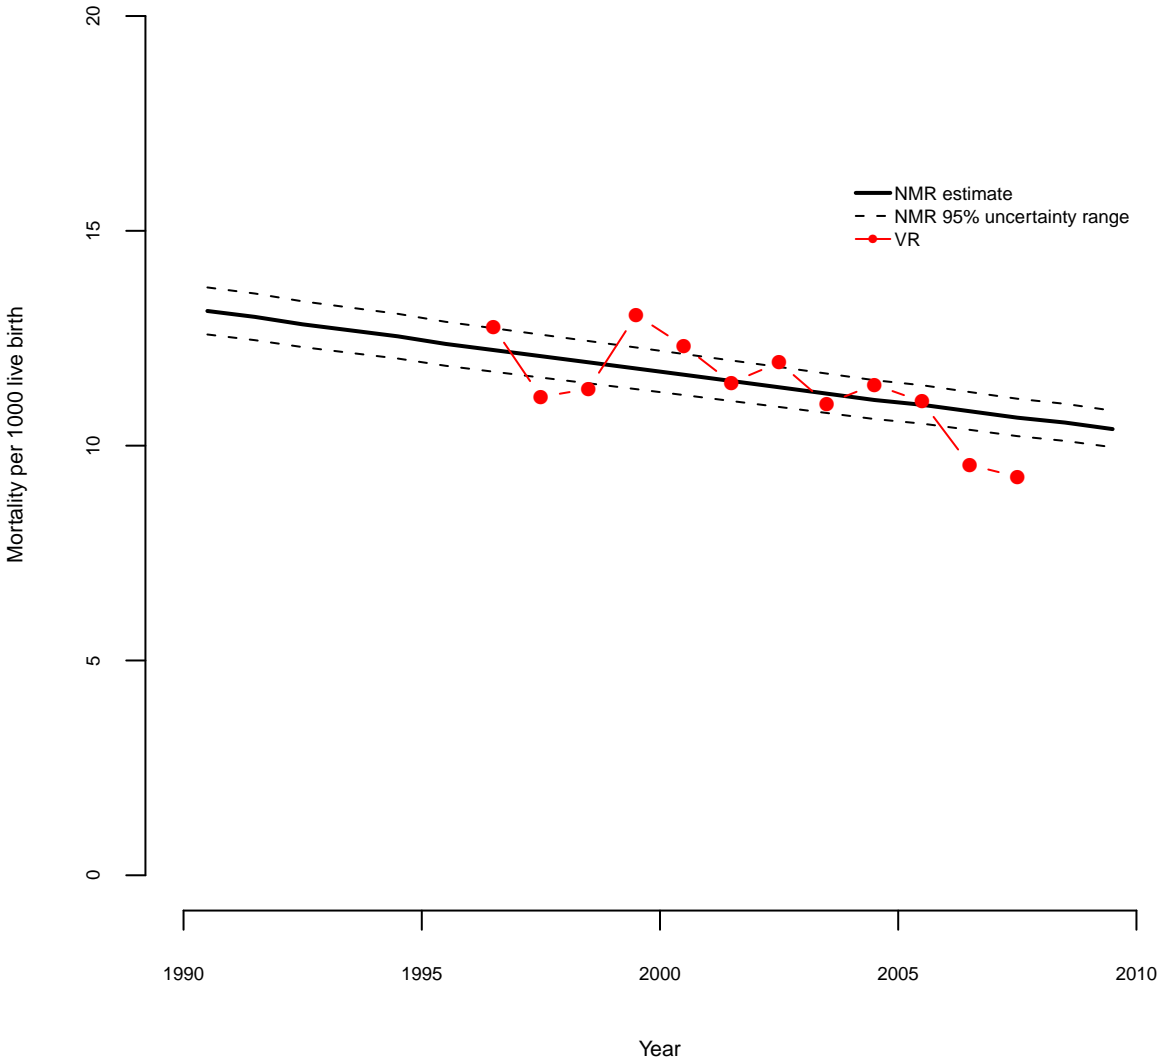

### Panama NMR and U5MR

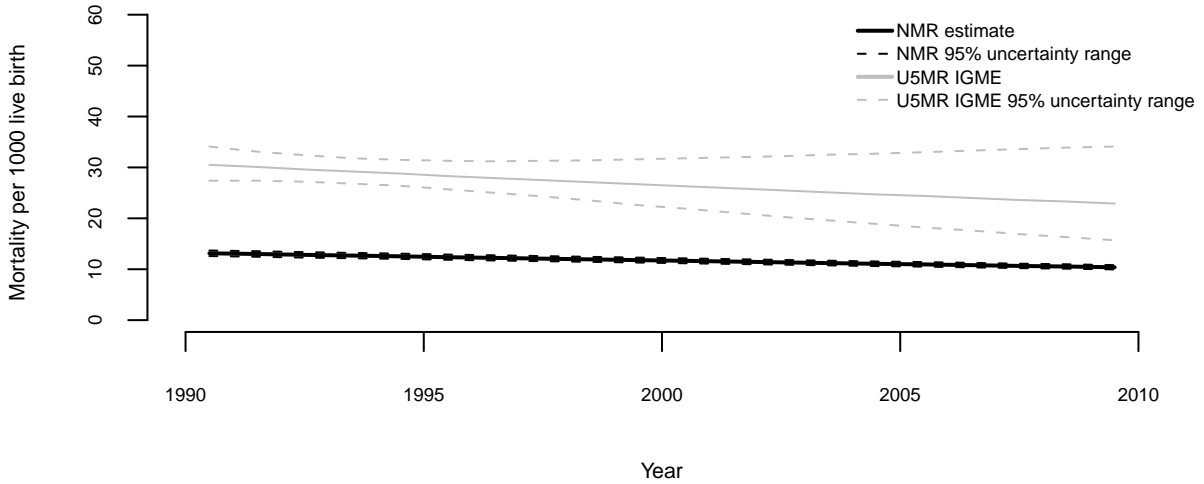

### Panama NMR as percentage of U5MR

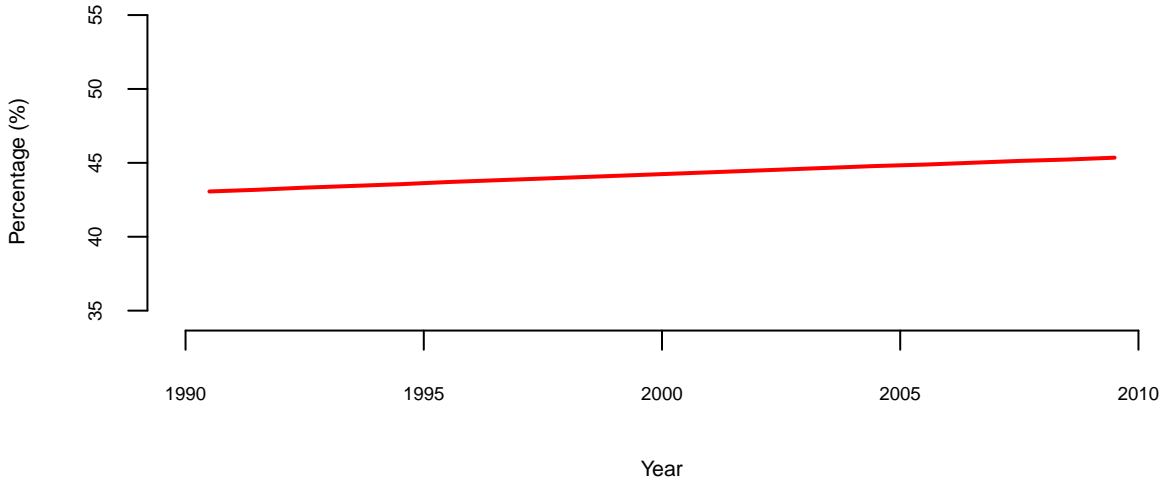

### Papua New Guinea Data, and estimated NMR

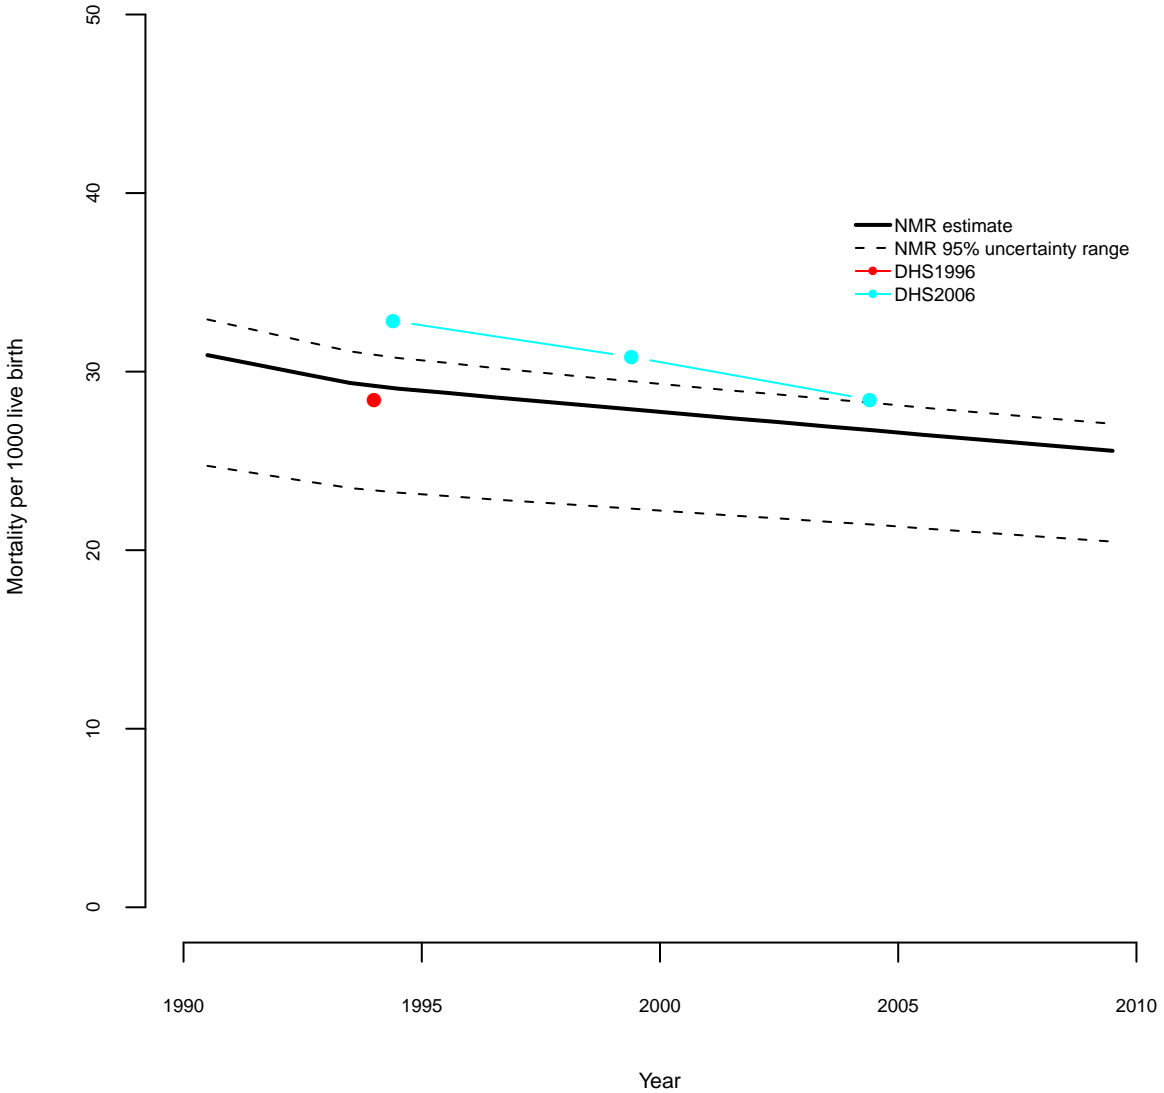

### Papua New Guinea NMR and U5MR

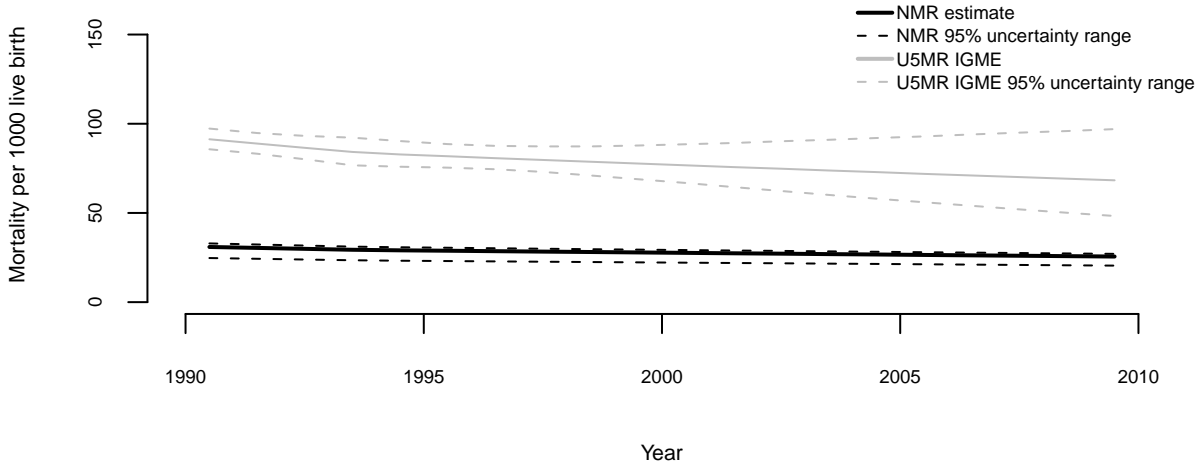

### Papua New Guinea NMR as percentage of U5MR

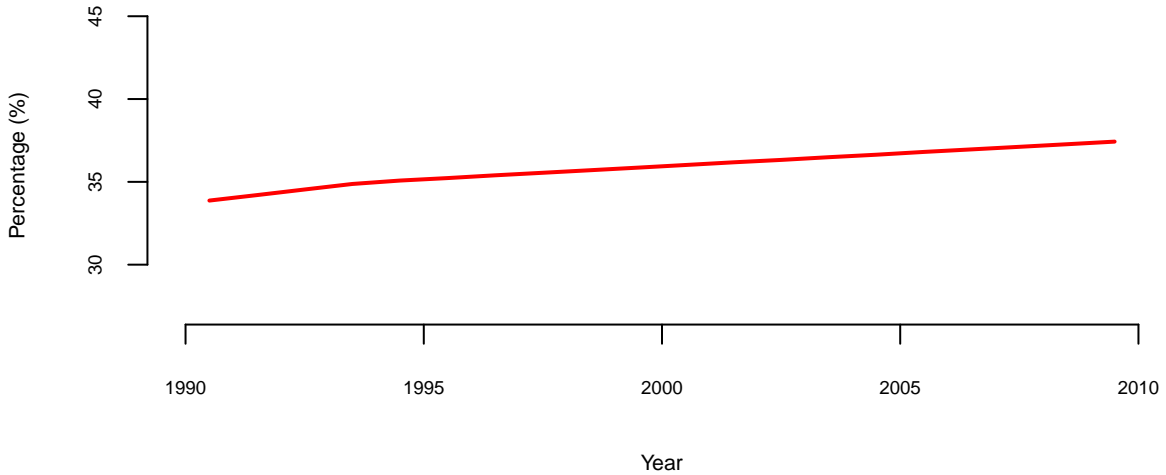



# Paraguay

## Data, and estimated NMR

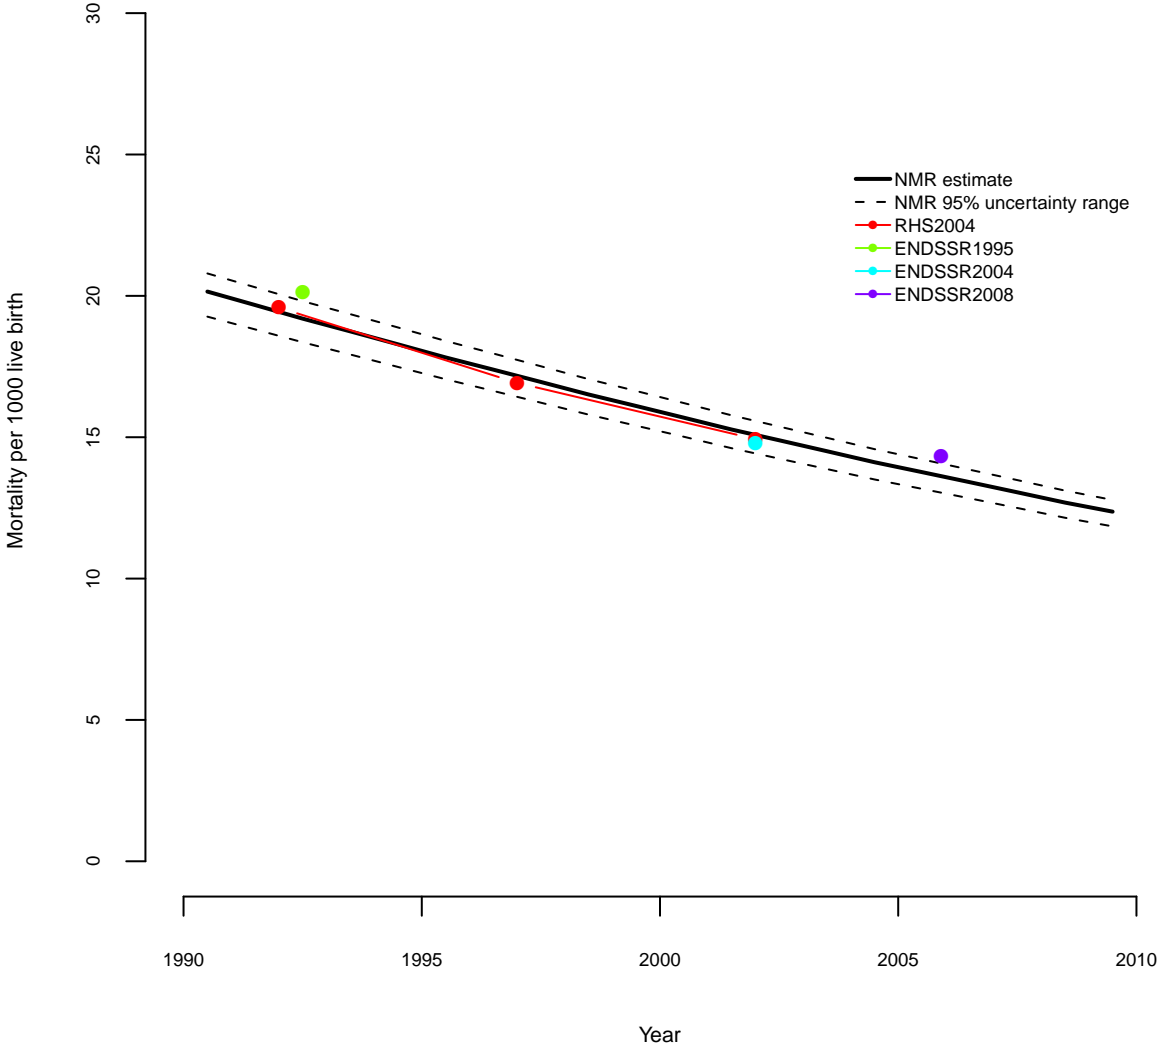

### Paraguay NMR and U5MR

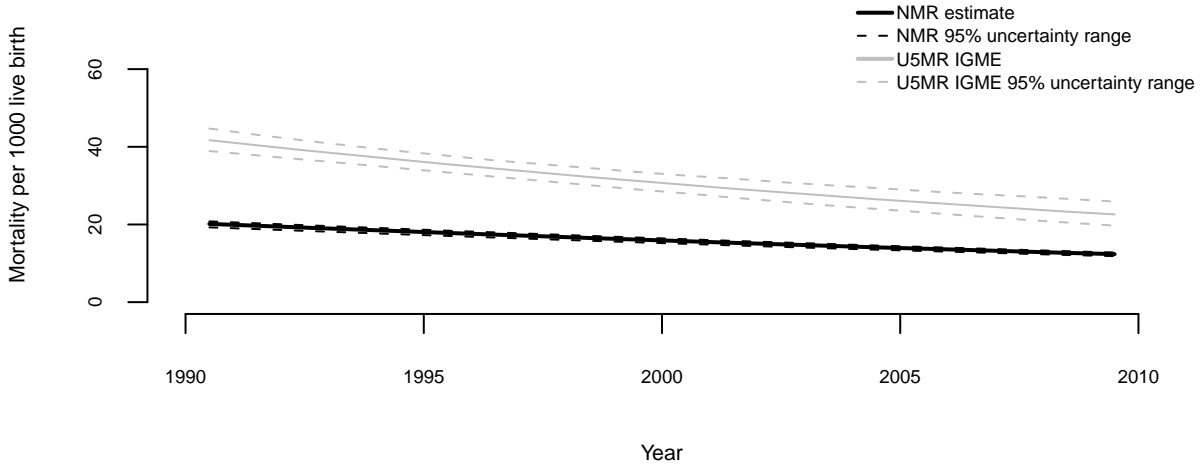

### Paraguay NMR as percentage of U5MR

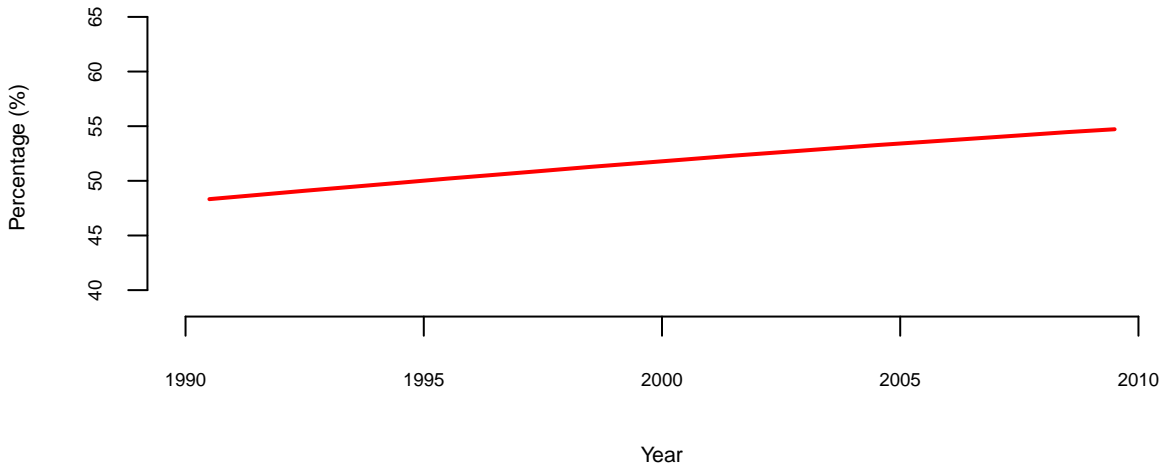

Peru  
Data, and estimated NMR

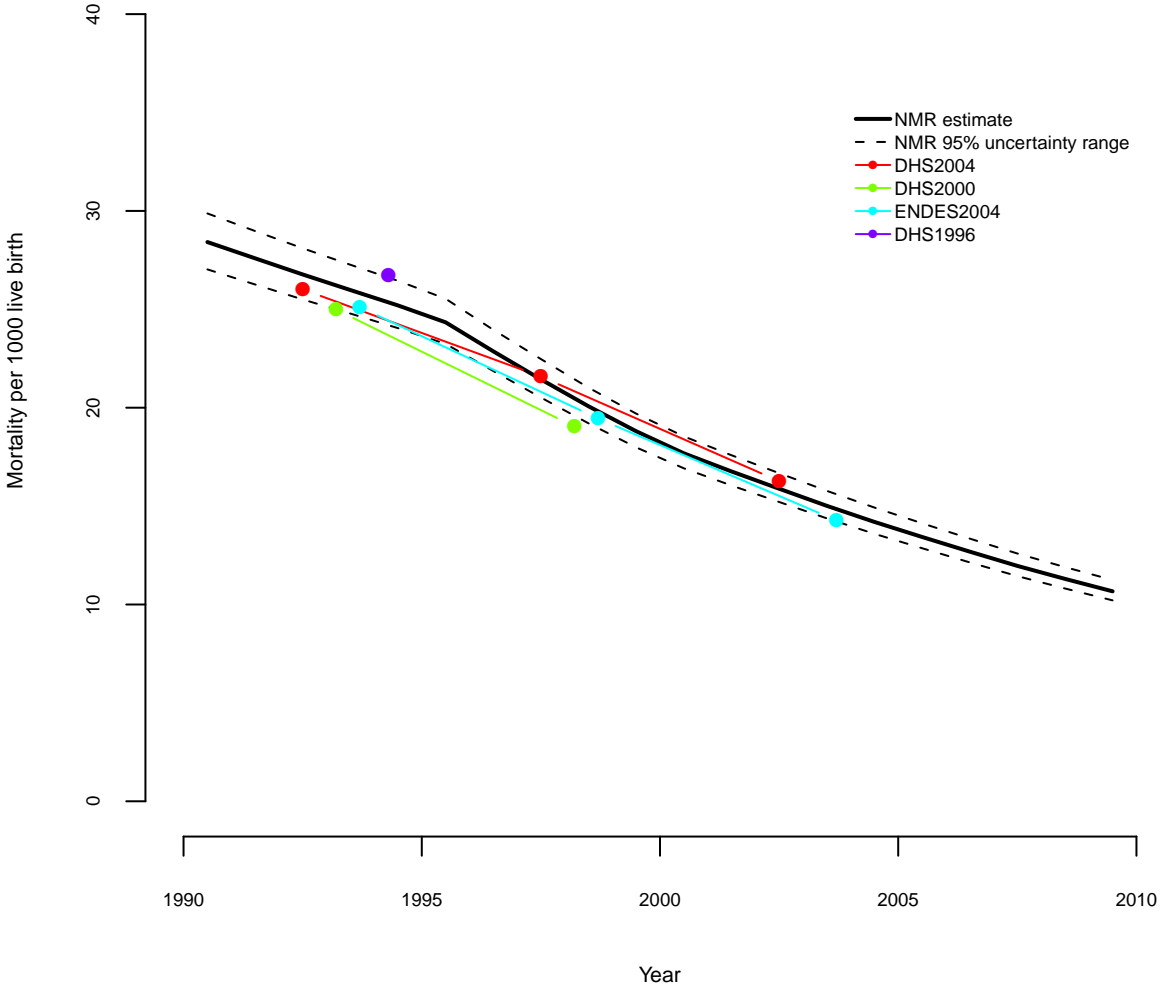

### Peru NMR and U5MR

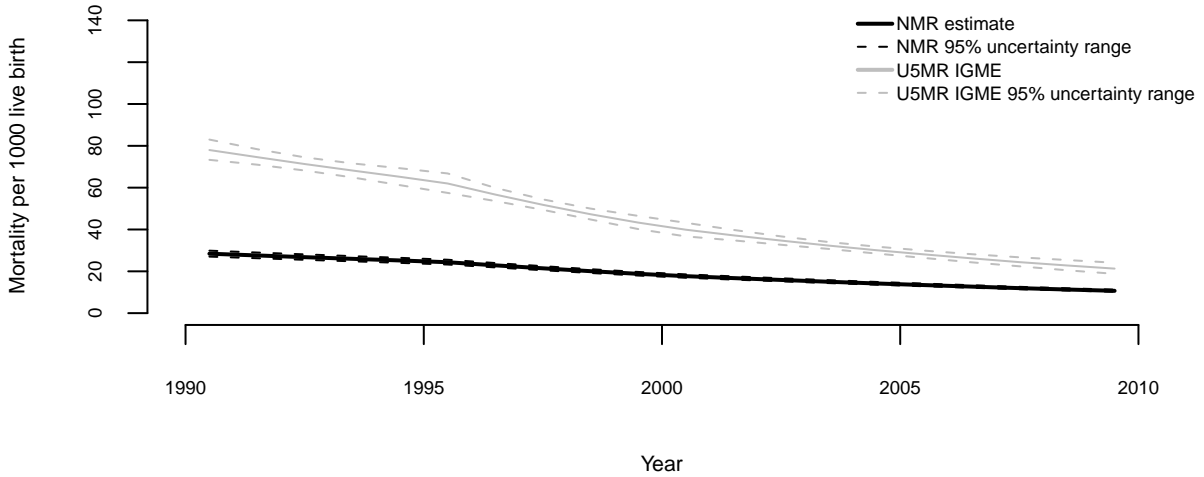

### Peru NMR as percentage of U5MR

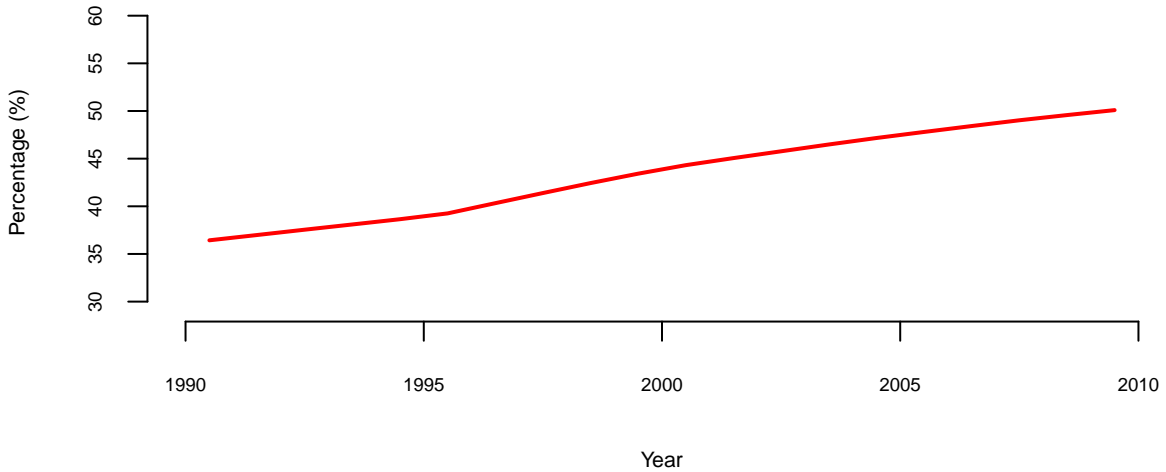

# Philippines Data, and estimated NMR

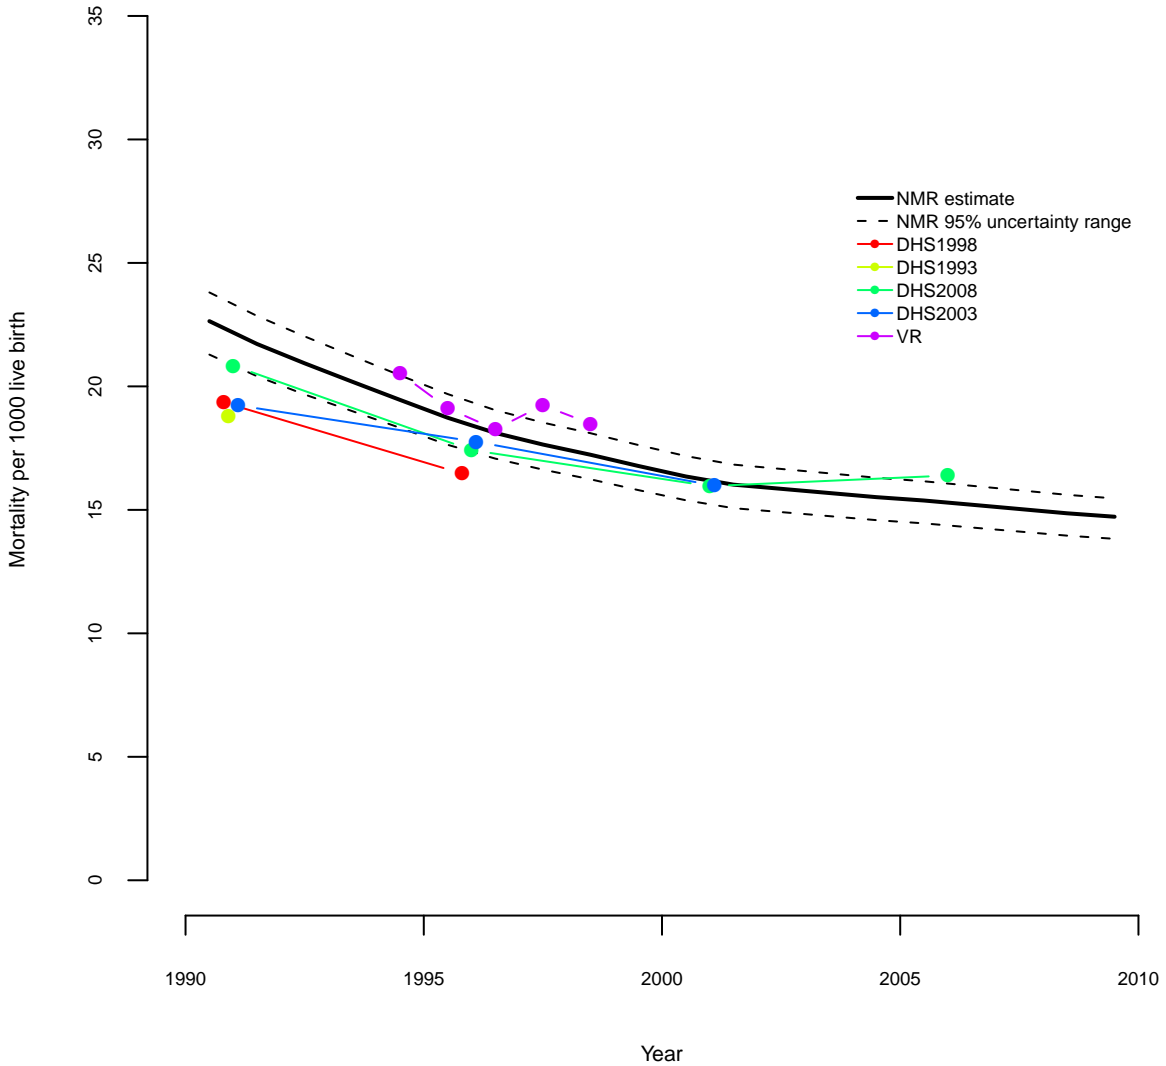

### Philippines NMR and U5MR

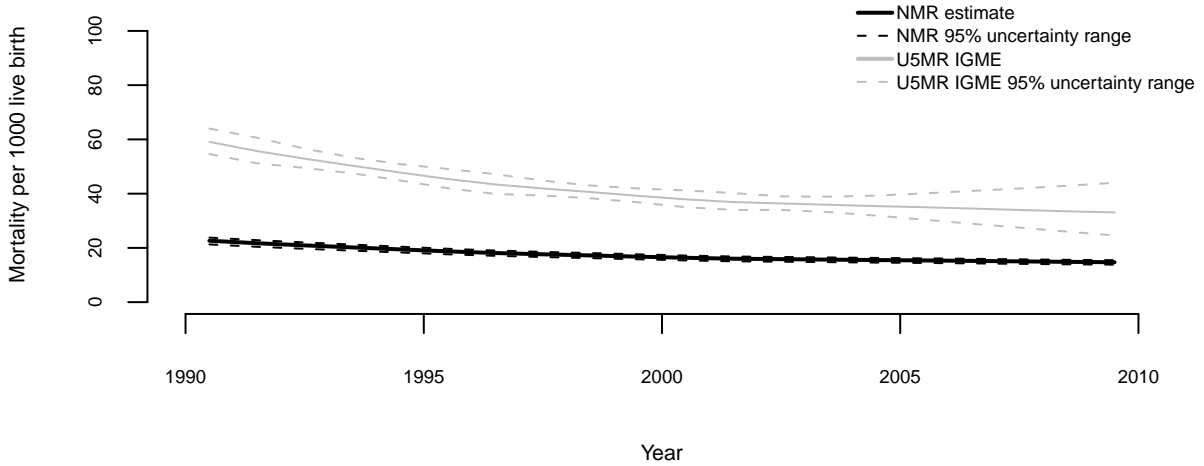

### Philippines NMR as percentage of U5MR

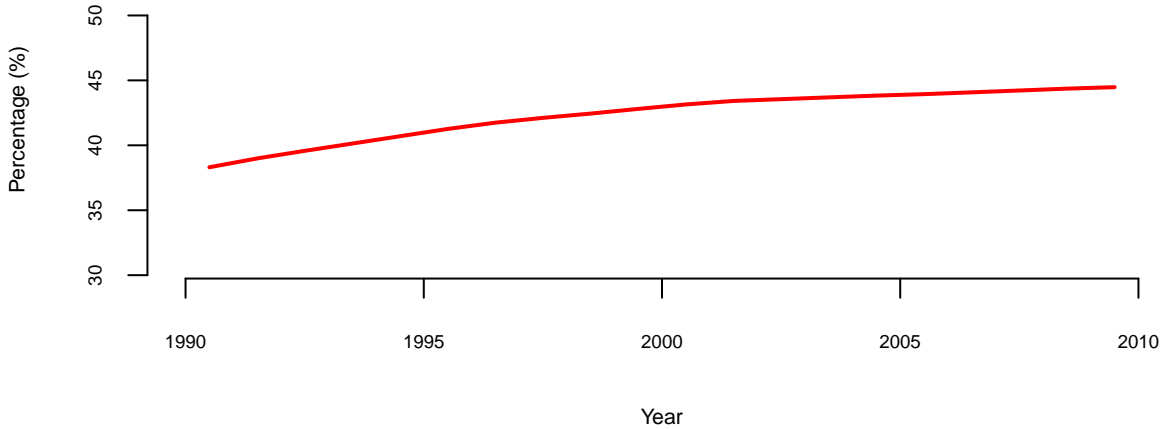

**Poland**  
**Data, and estimated NMR**

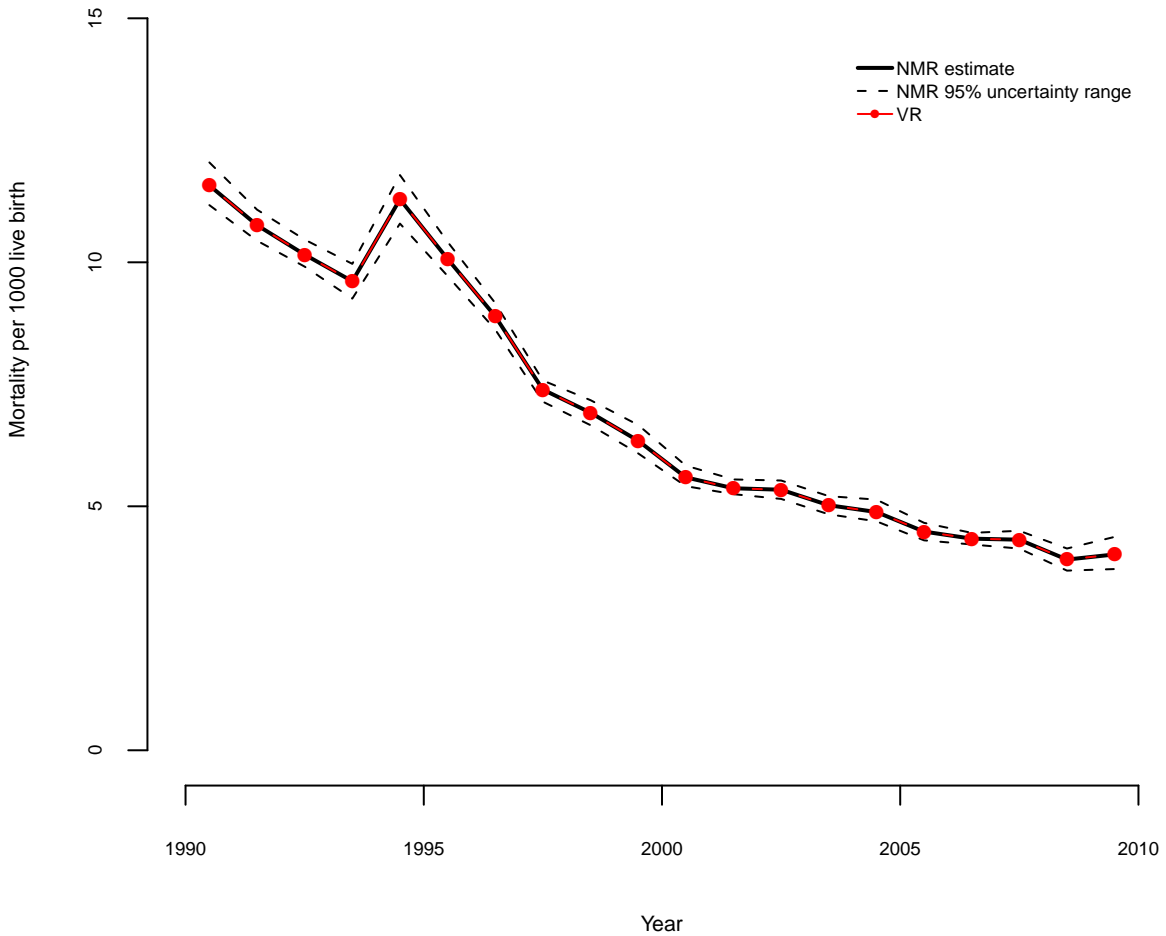

### Poland NMR and U5MR

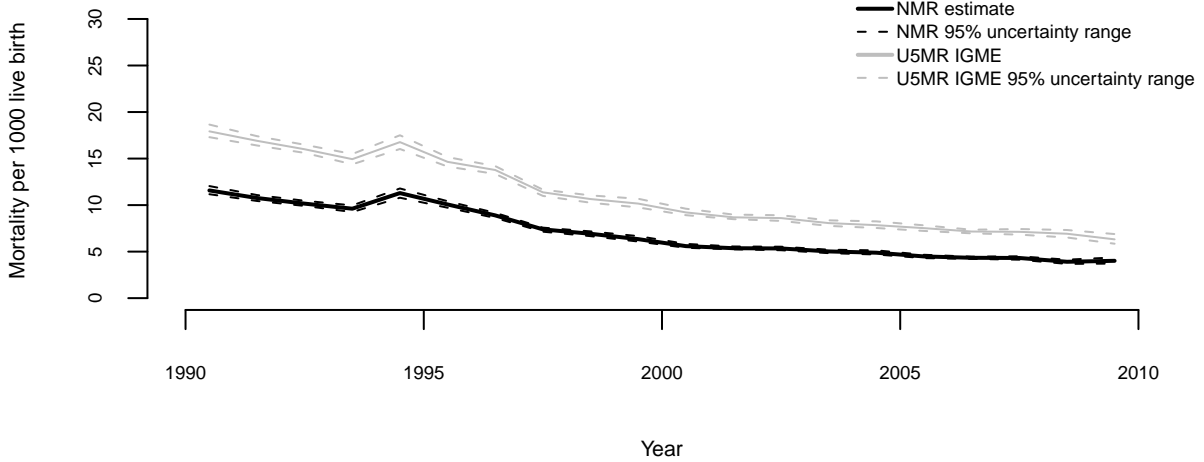

### Poland NMR as percentage of U5MR

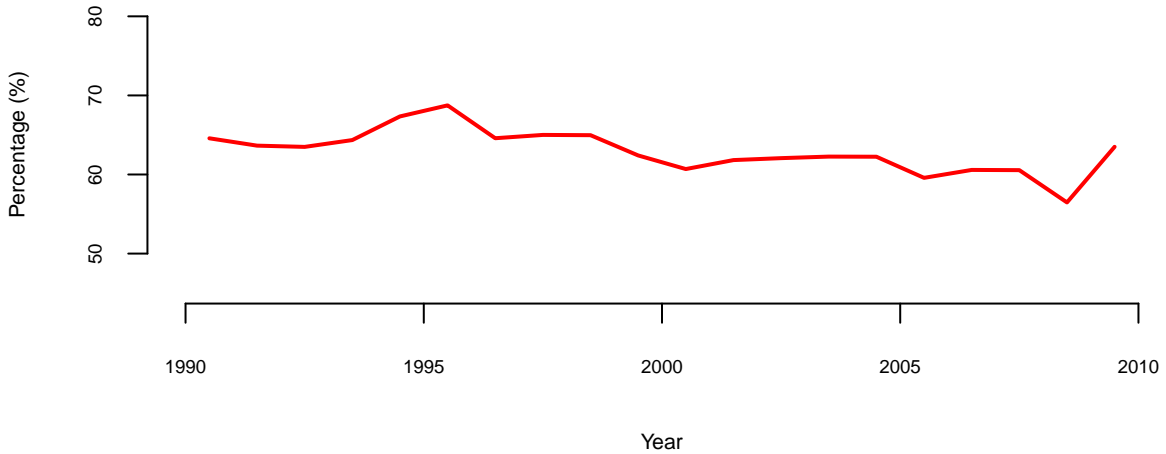



Portugal  
Data, and estimated NMR

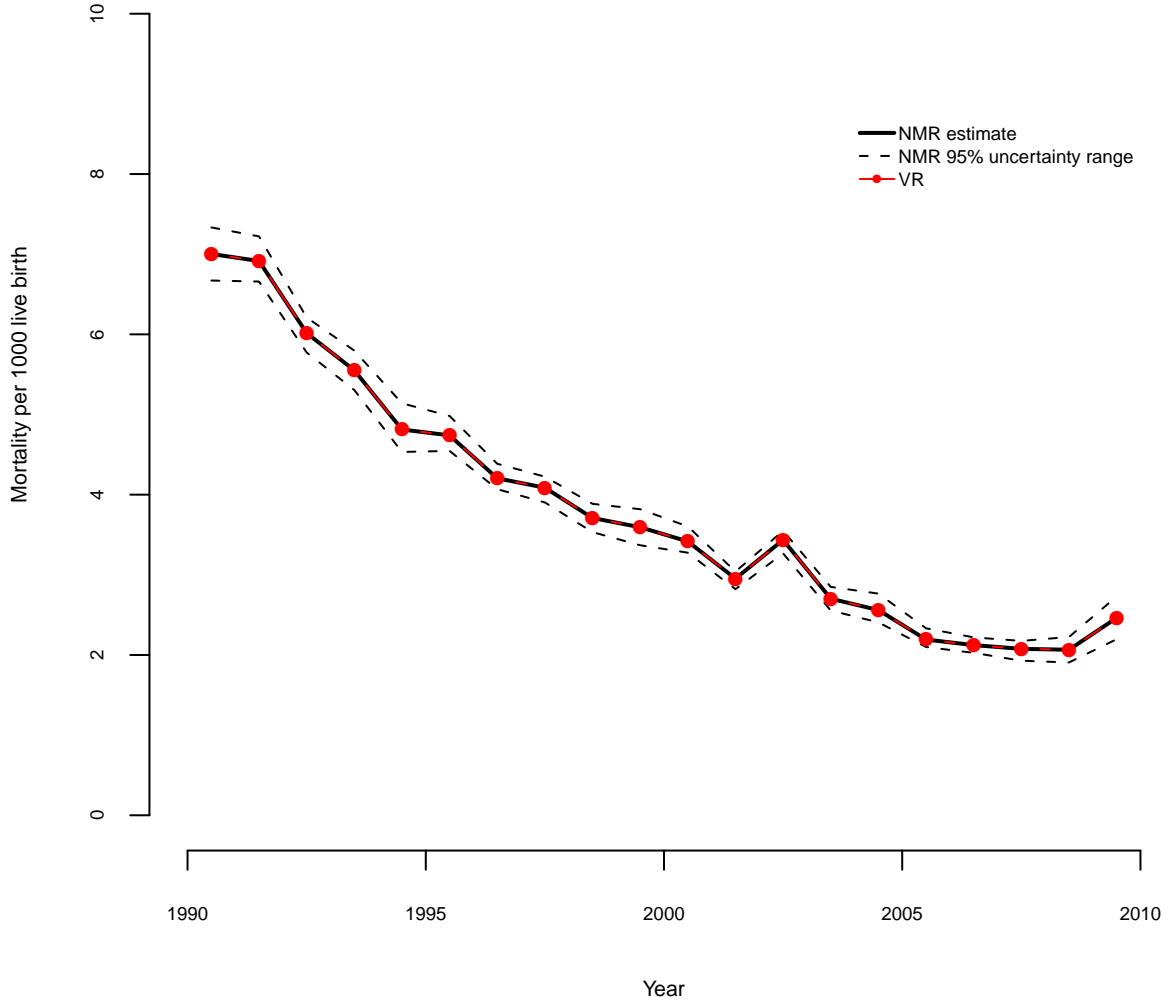

### Portugal NMR and U5MR

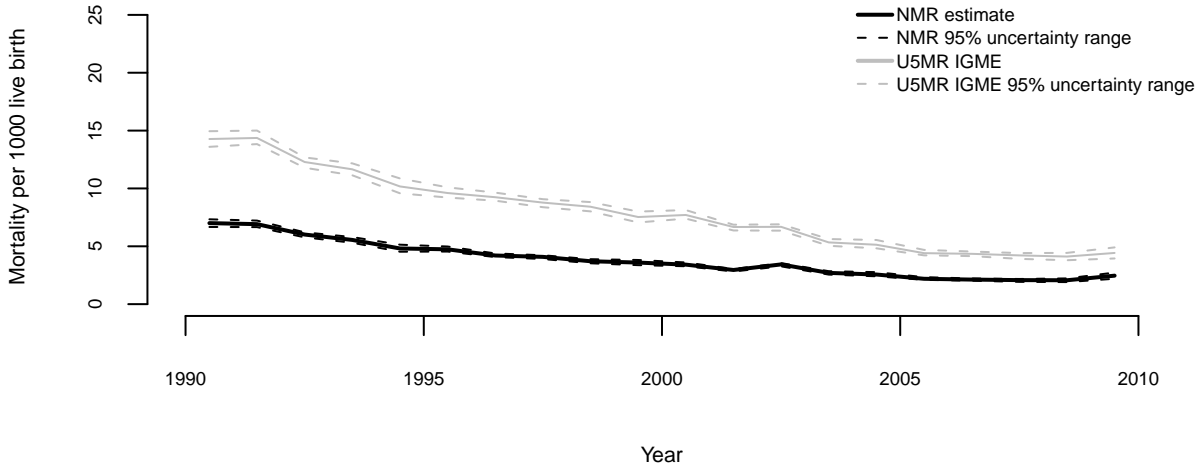

### Portugal NMR as percentage of U5MR

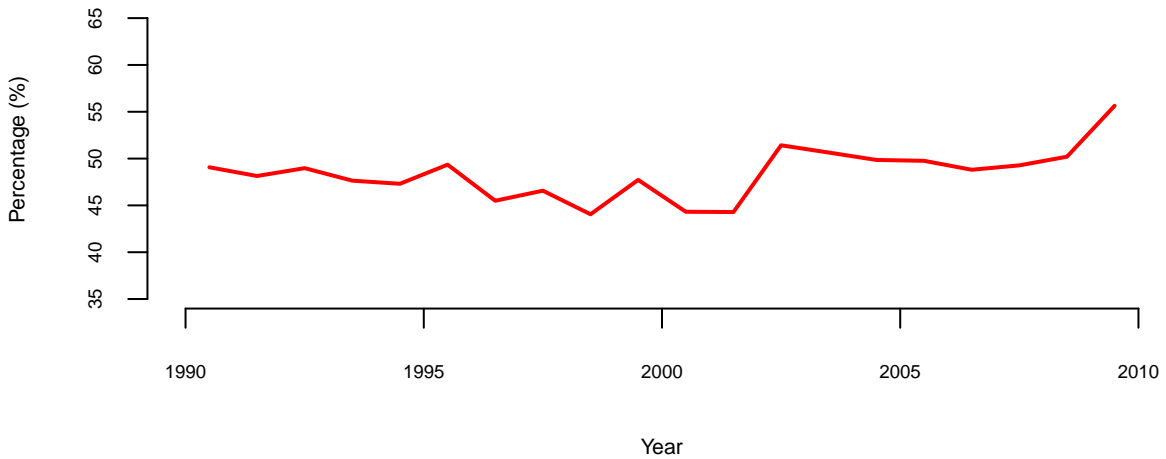

**Qatar**  
**Data, and estimated NMR**

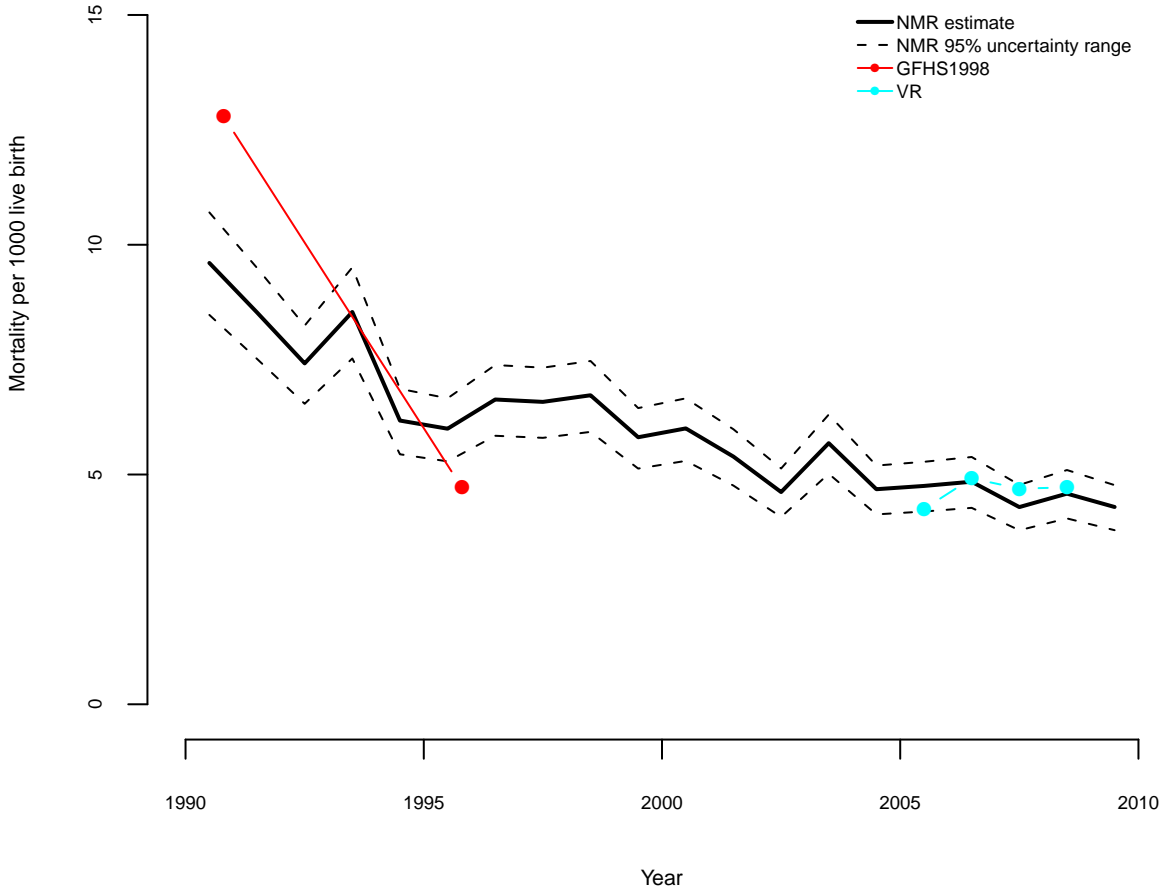

### Qatar NMR and U5MR

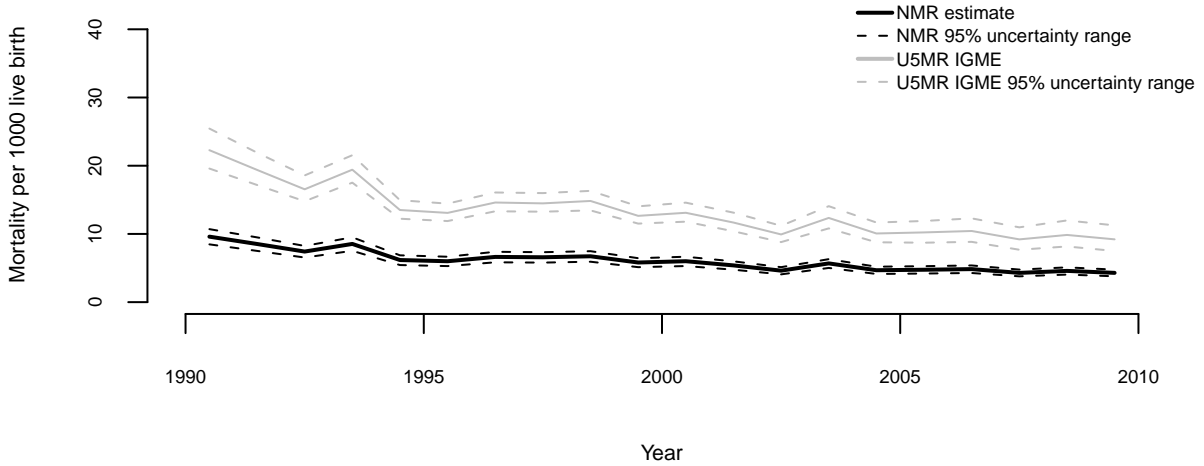

### Qatar NMR as percentage of U5MR

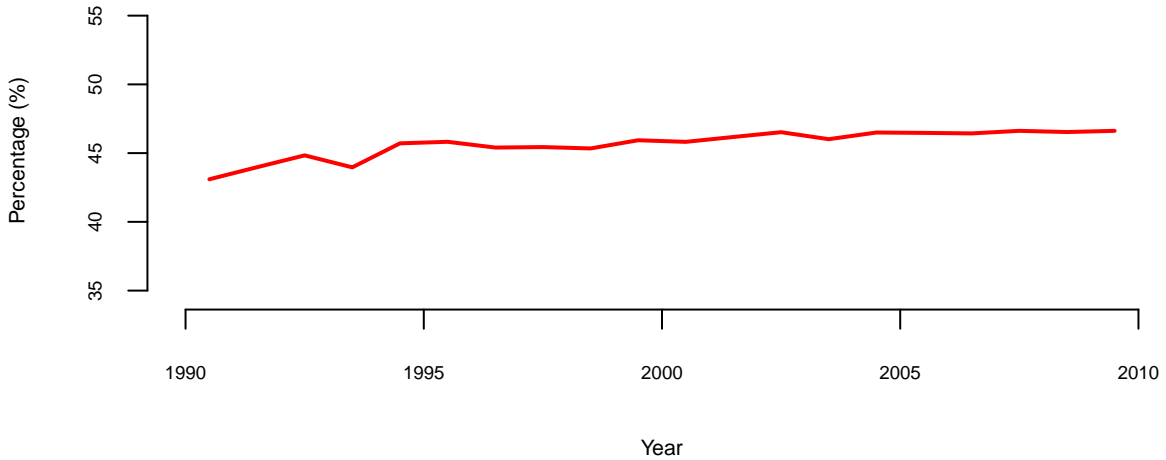

Republic of Korea  
Data, and estimated NMR

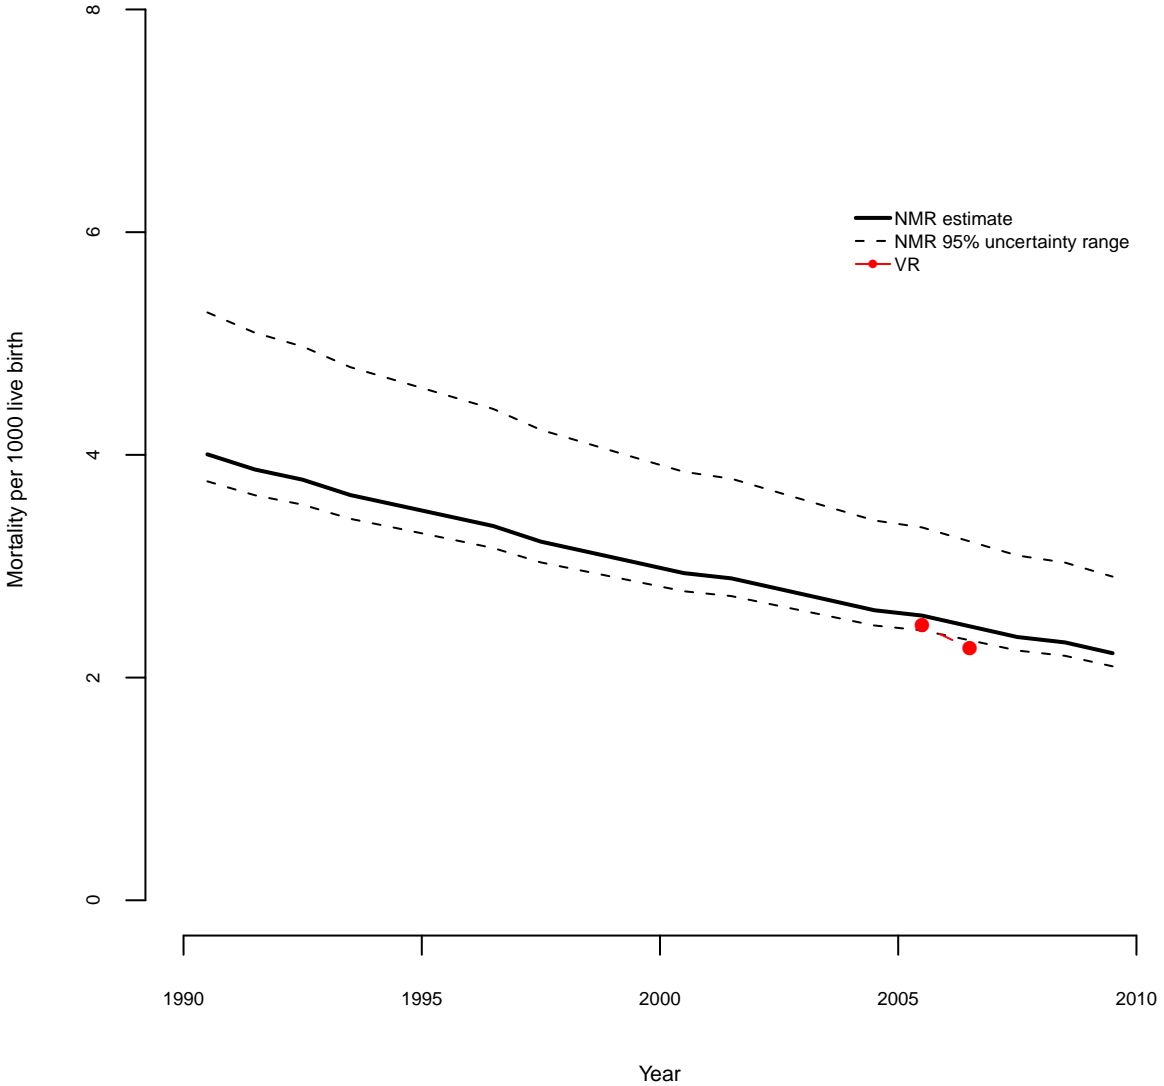

### Republic of Korea NMR and U5MR

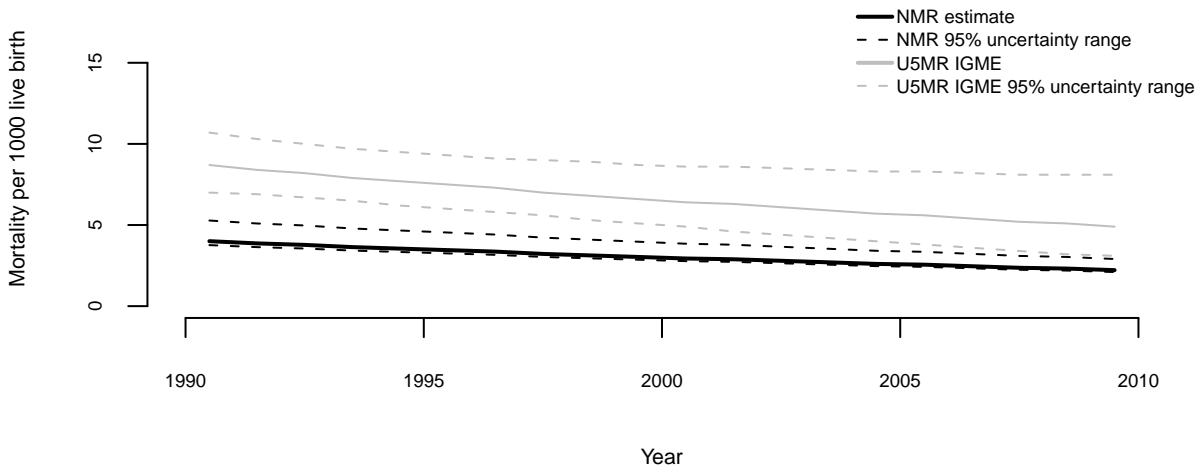

### Republic of Korea NMR as percentage of U5MR

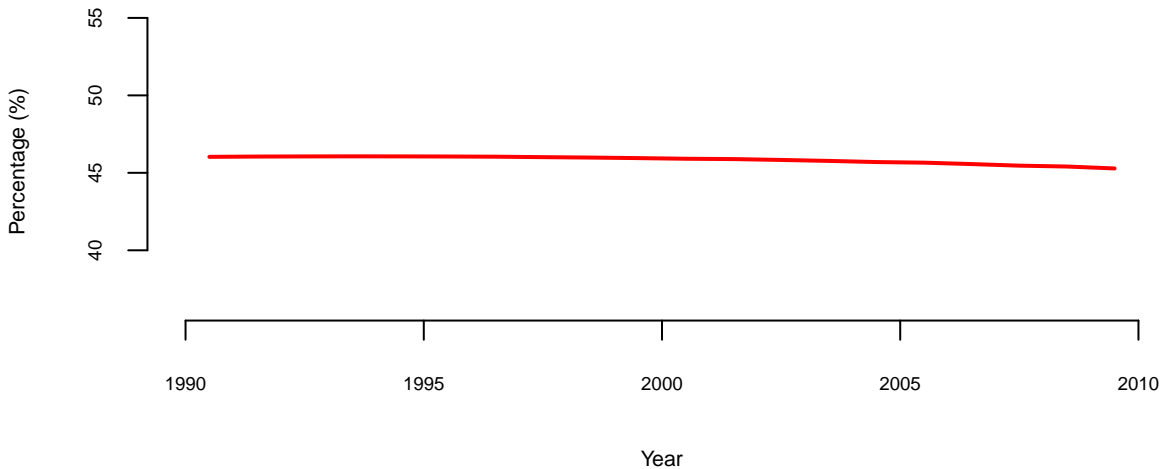

Republic of Moldova  
Data, and estimated NMR

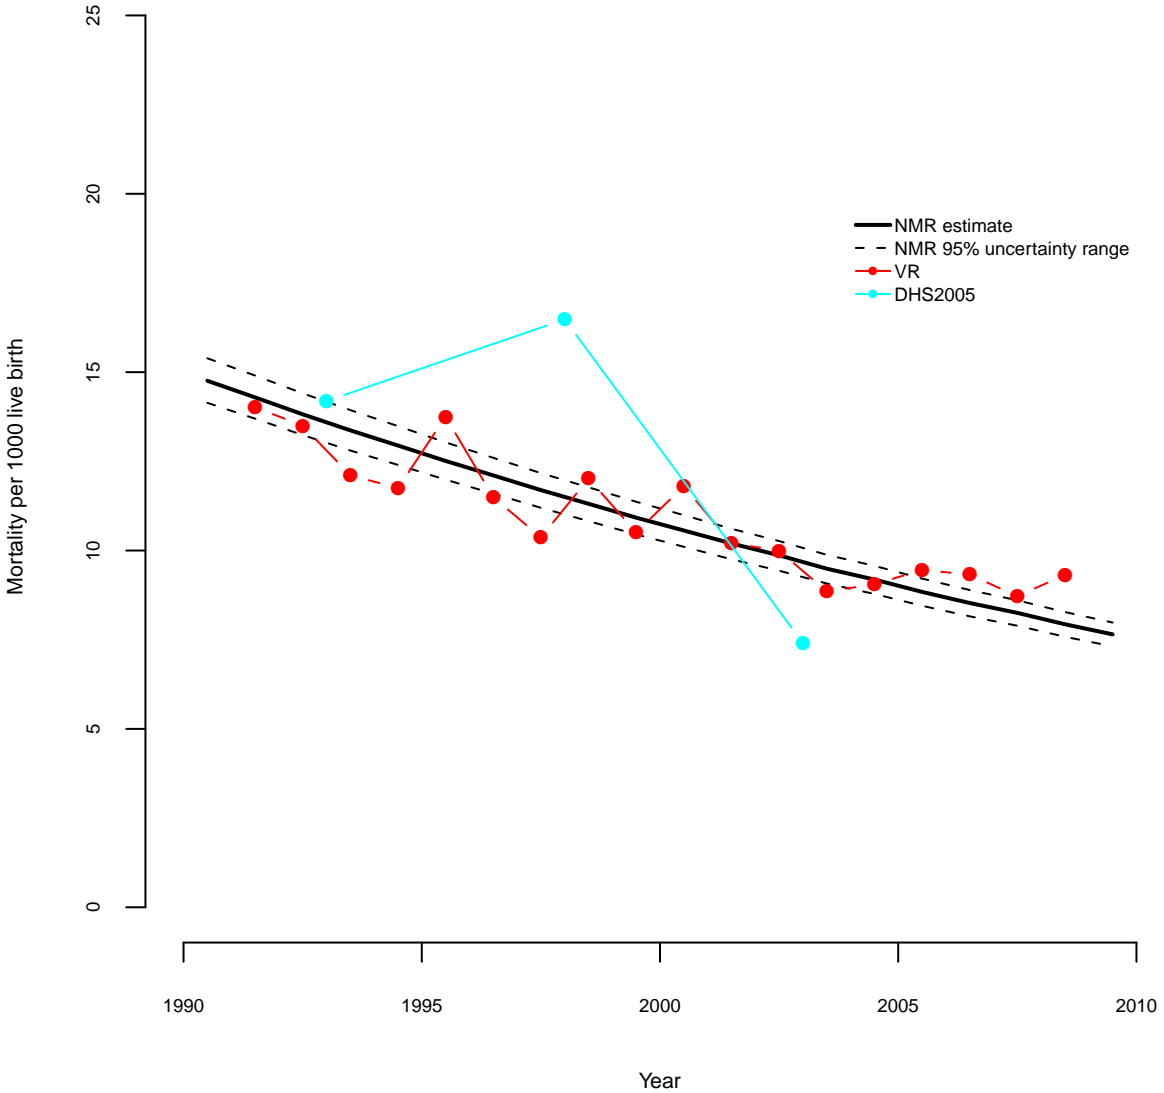

### Republic of Moldova NMR and U5MR

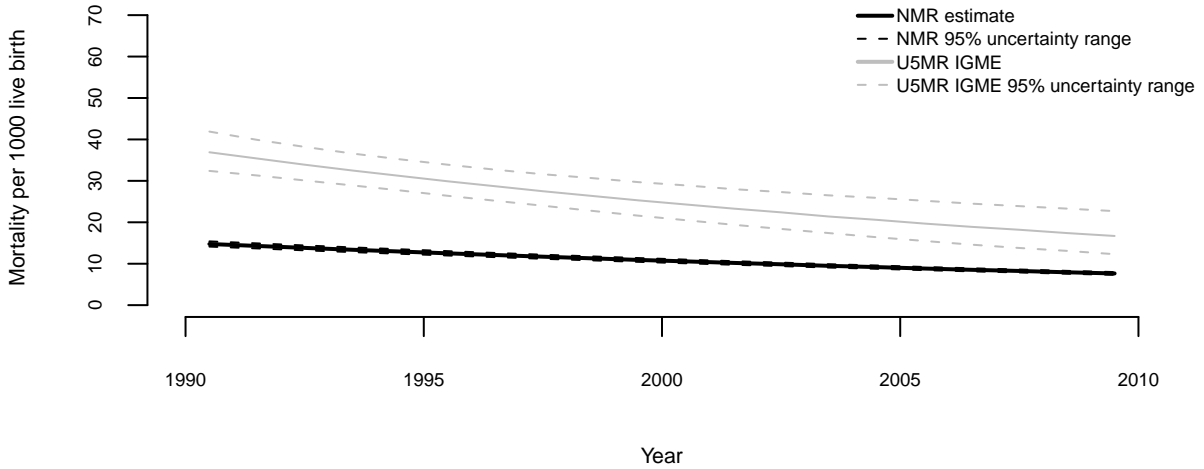

### Republic of Moldova NMR as percentage of U5MR

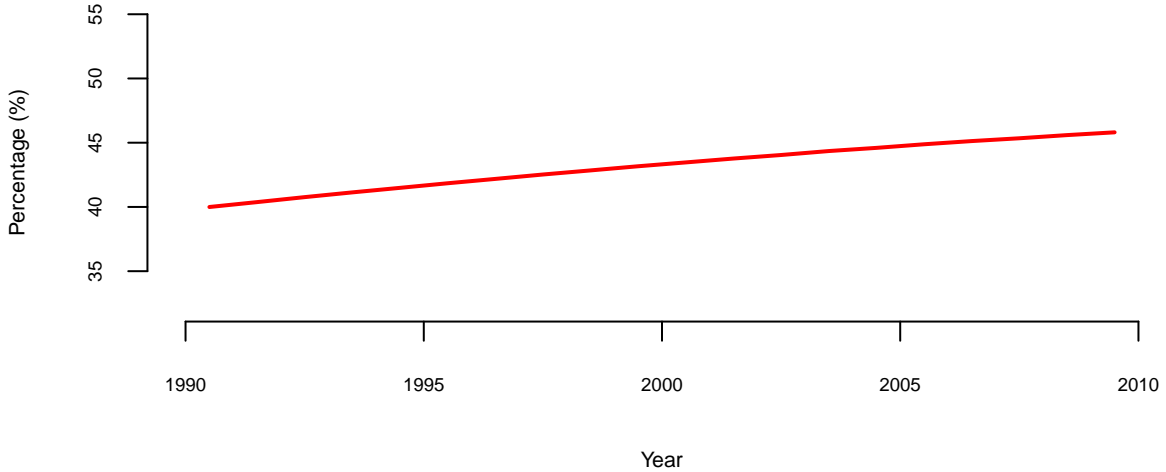



Romania  
Data, and estimated NMR

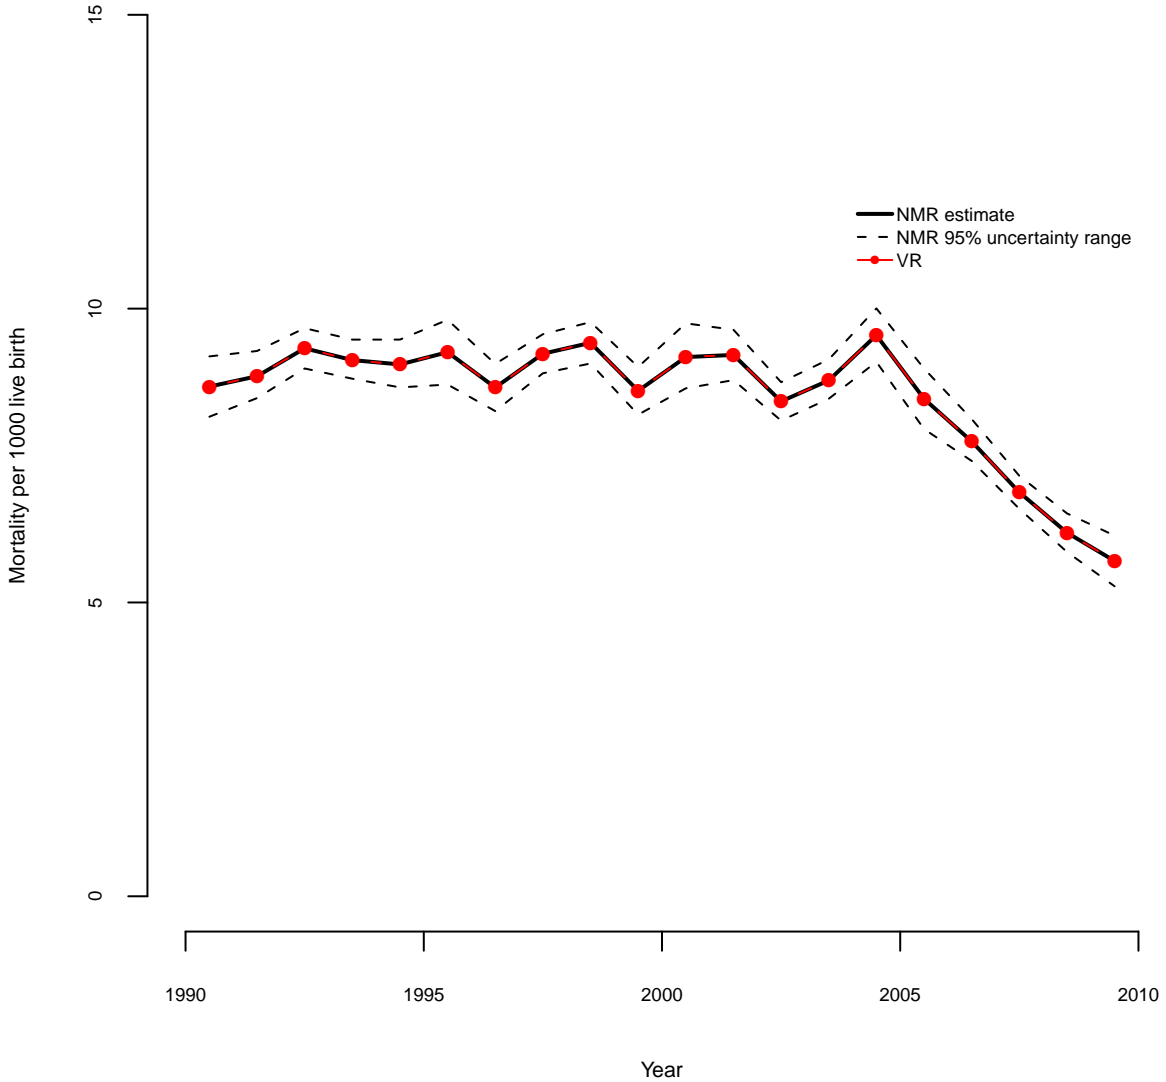

### Romania NMR and U5MR

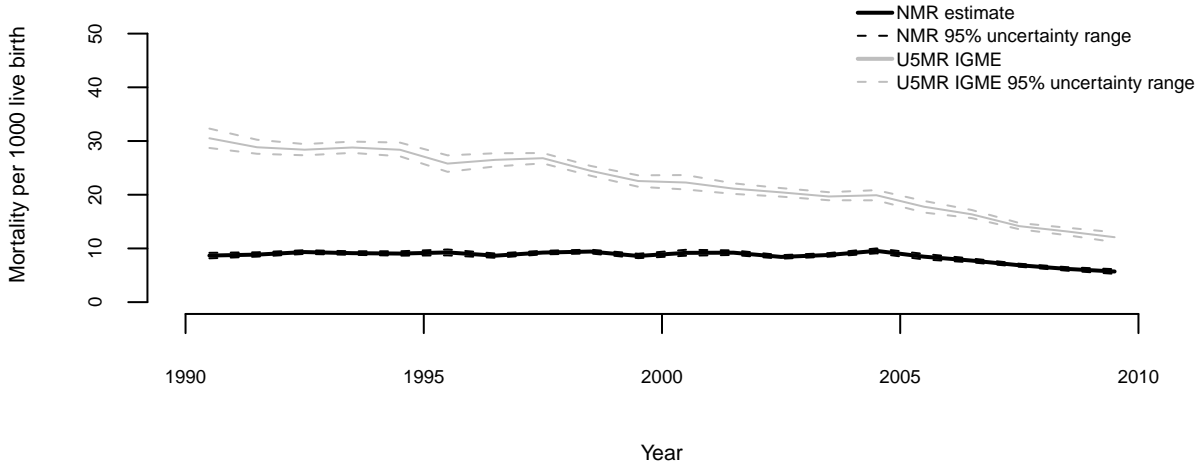

### Romania NMR as percentage of U5MR

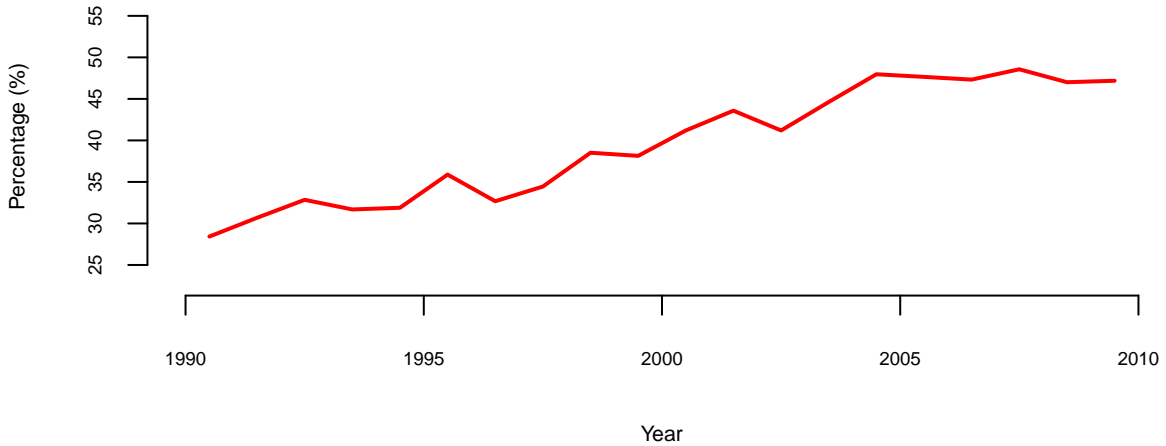

### Russian Federation Data, and estimated NMR

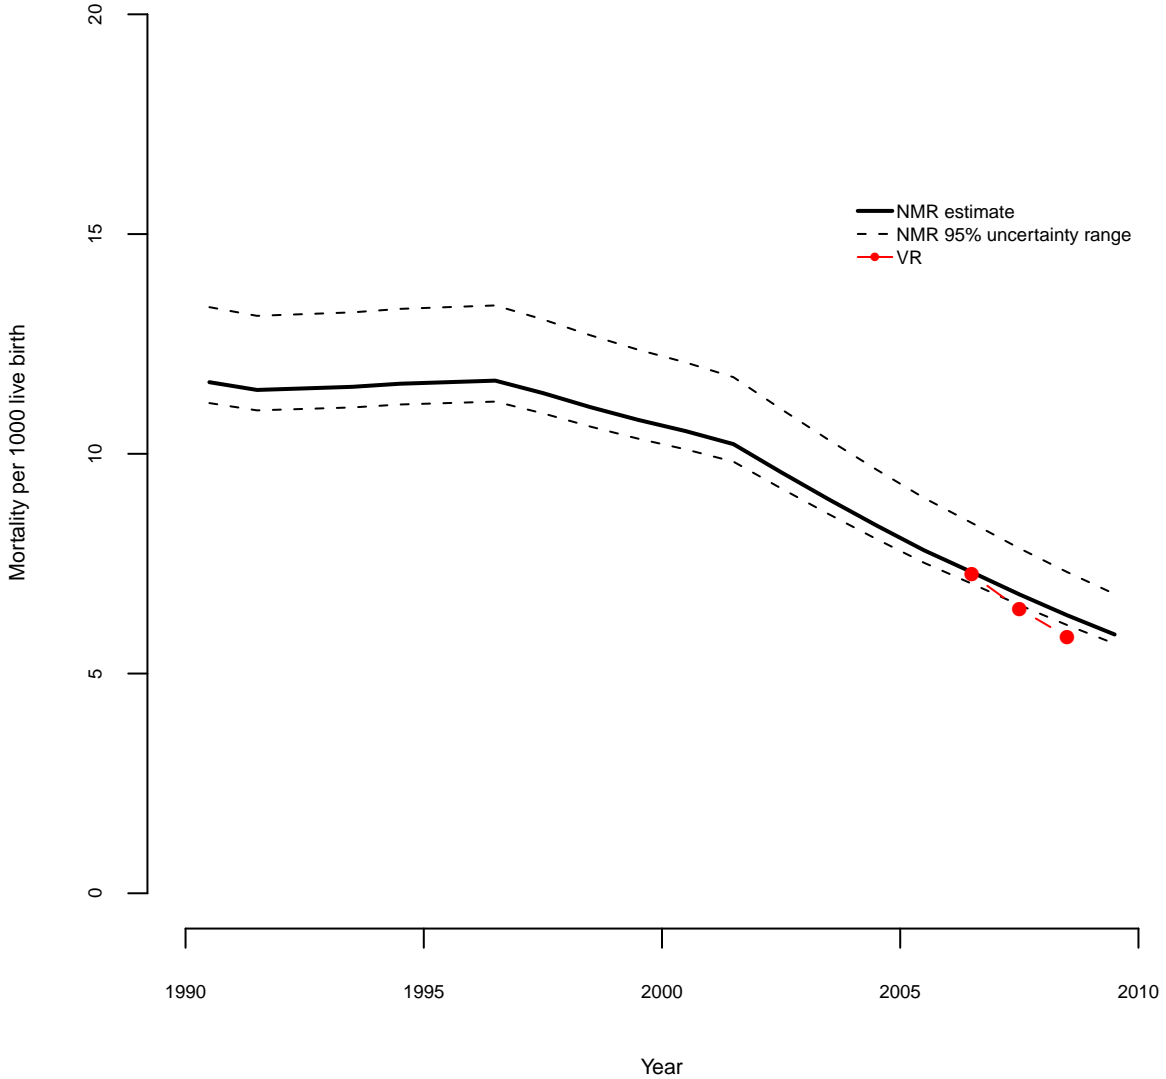

### Russian Federation NMR and U5MR

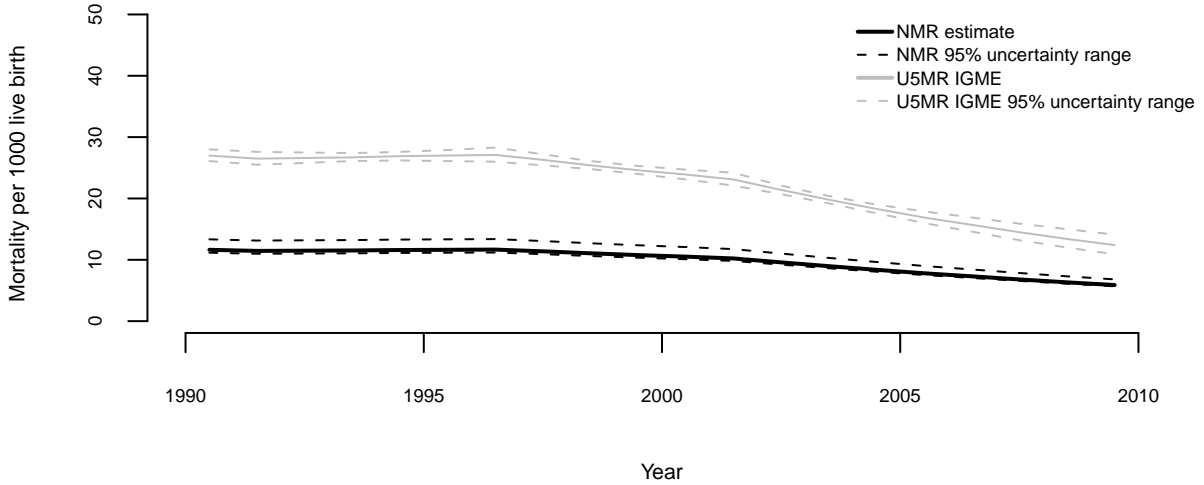

### Russian Federation NMR as percentage of U5MR

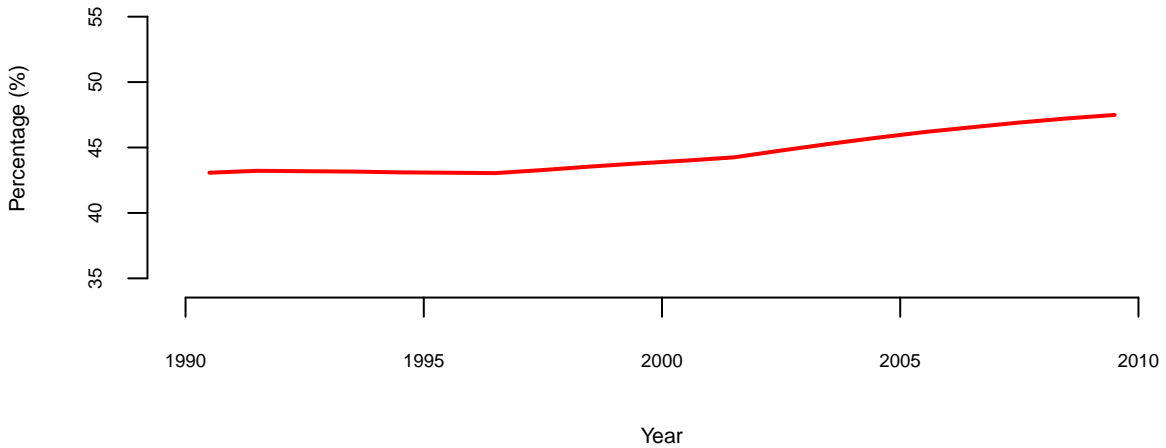

Rwanda  
Data, and estimated NMR

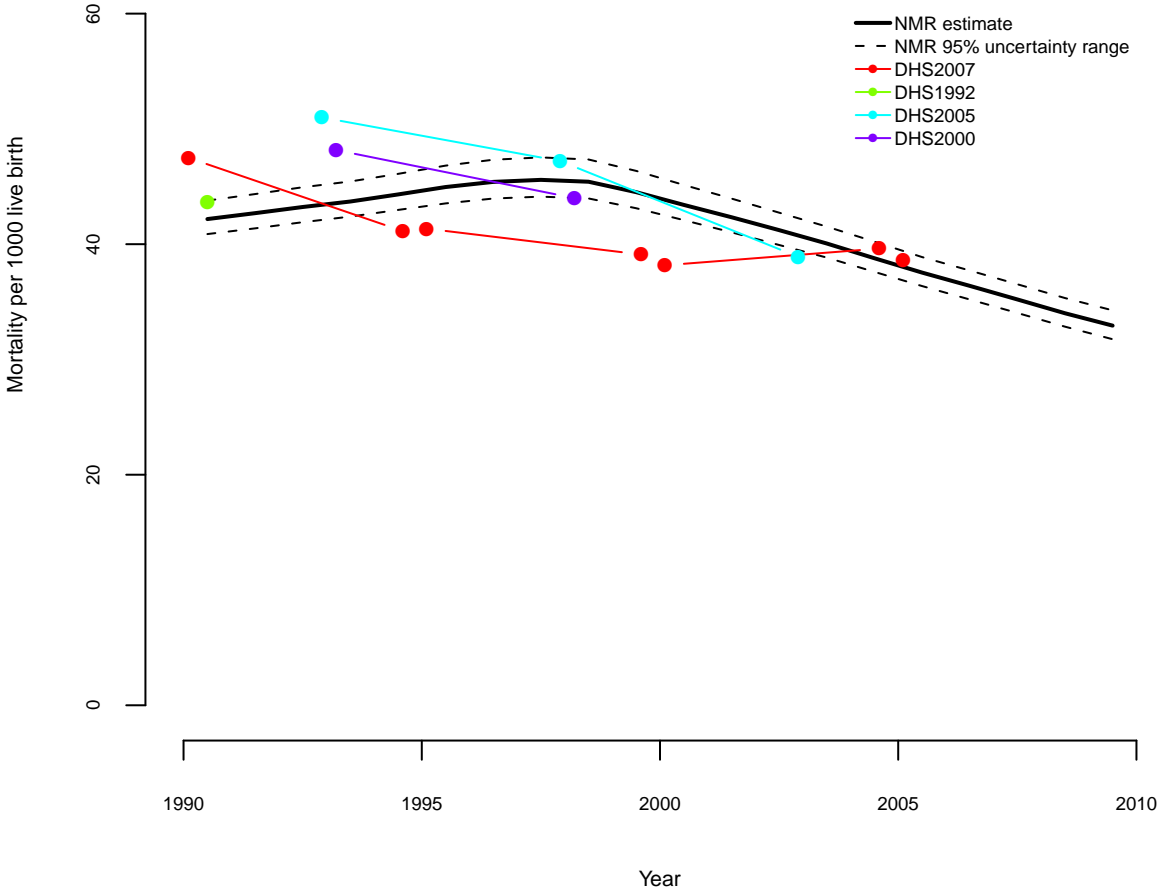

### Rwanda NMR and U5MR

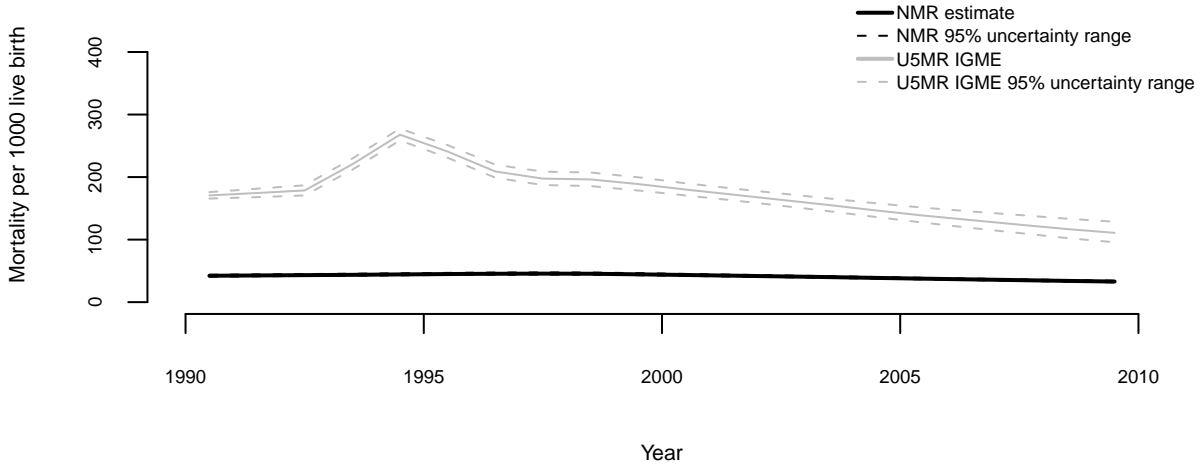

### Rwanda NMR as percentage of U5MR

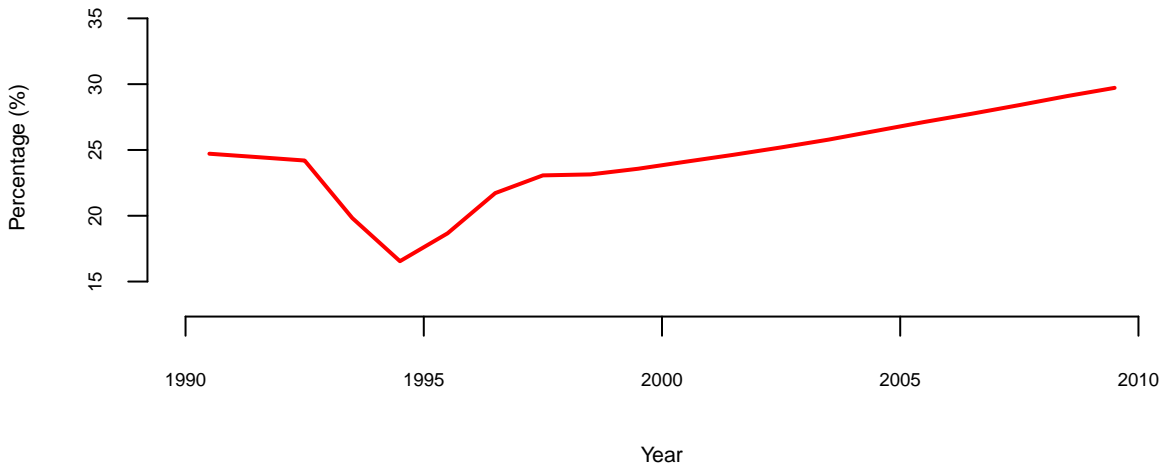

### Saint Kitts and Nevis Data, and estimated NMR

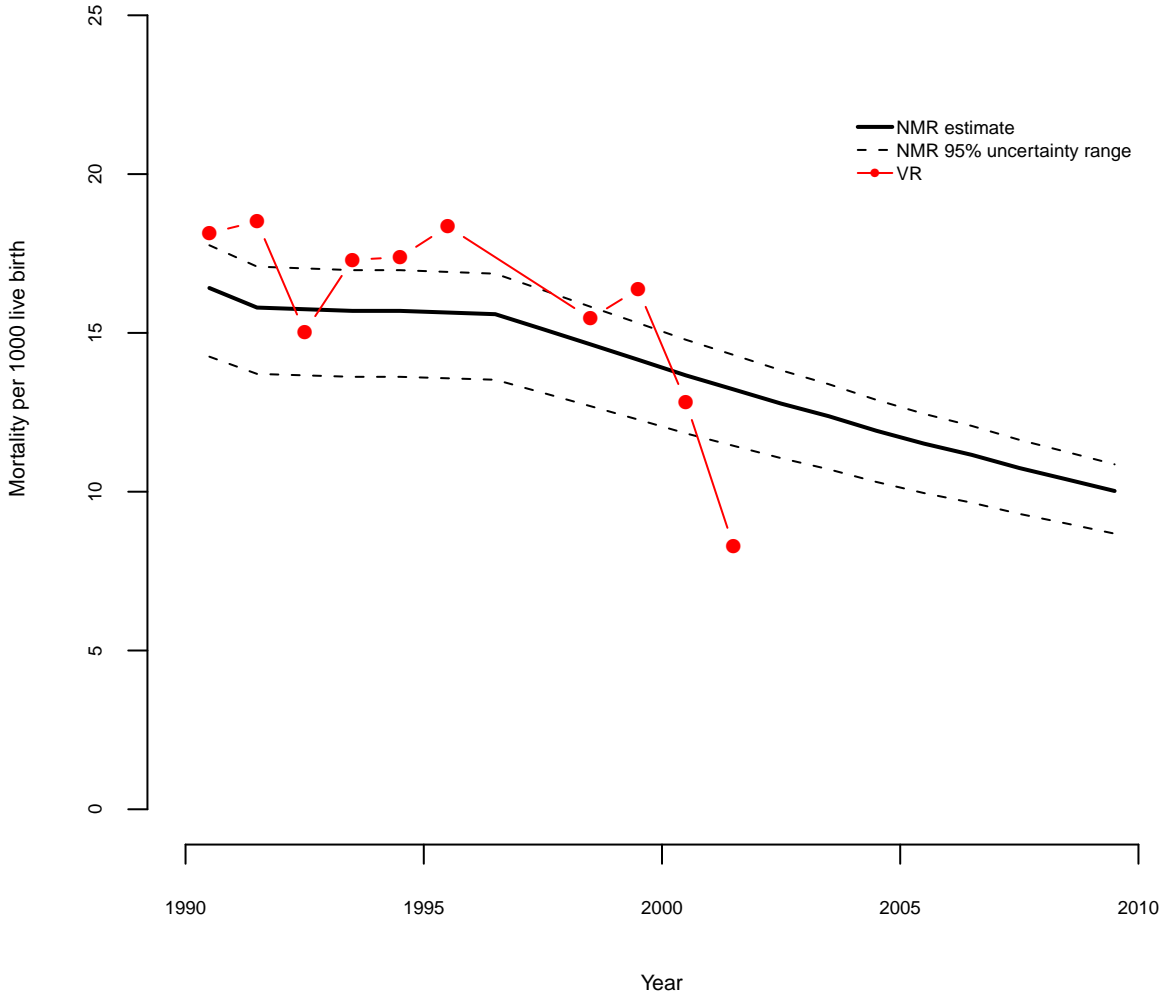

### Saint Kitts and Nevis NMR and U5MR

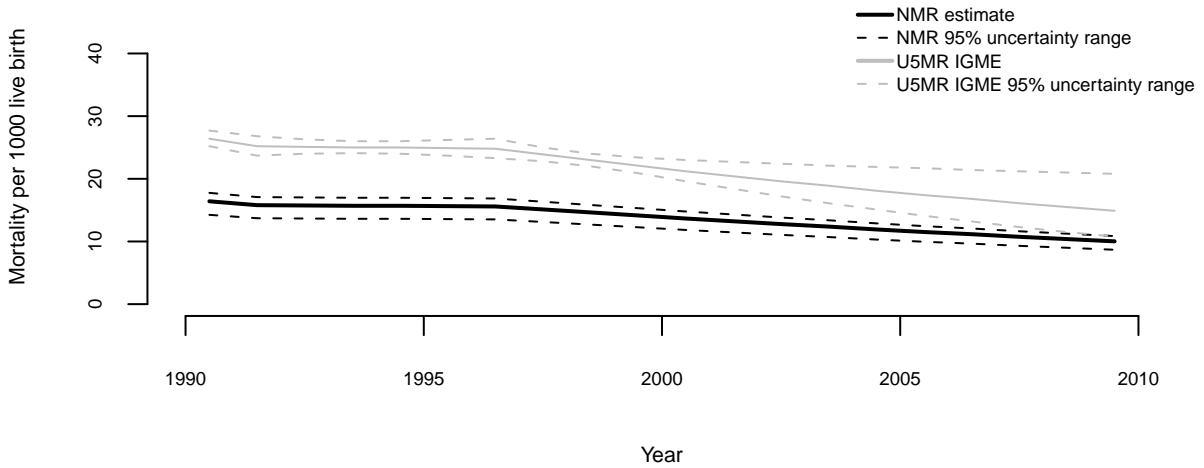

### Saint Kitts and Nevis NMR as percentage of U5MR

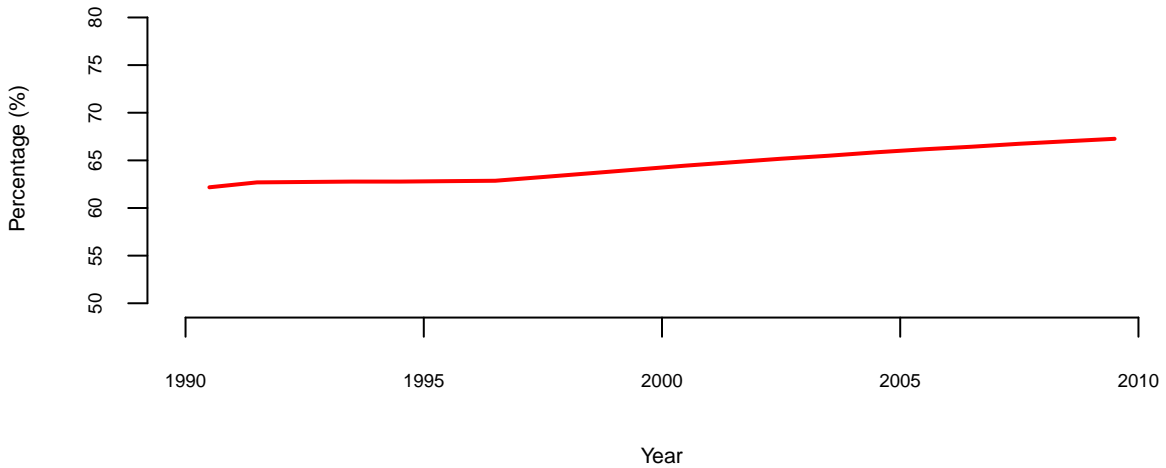



**Saint Lucia**  
**Data, and estimated NMR**

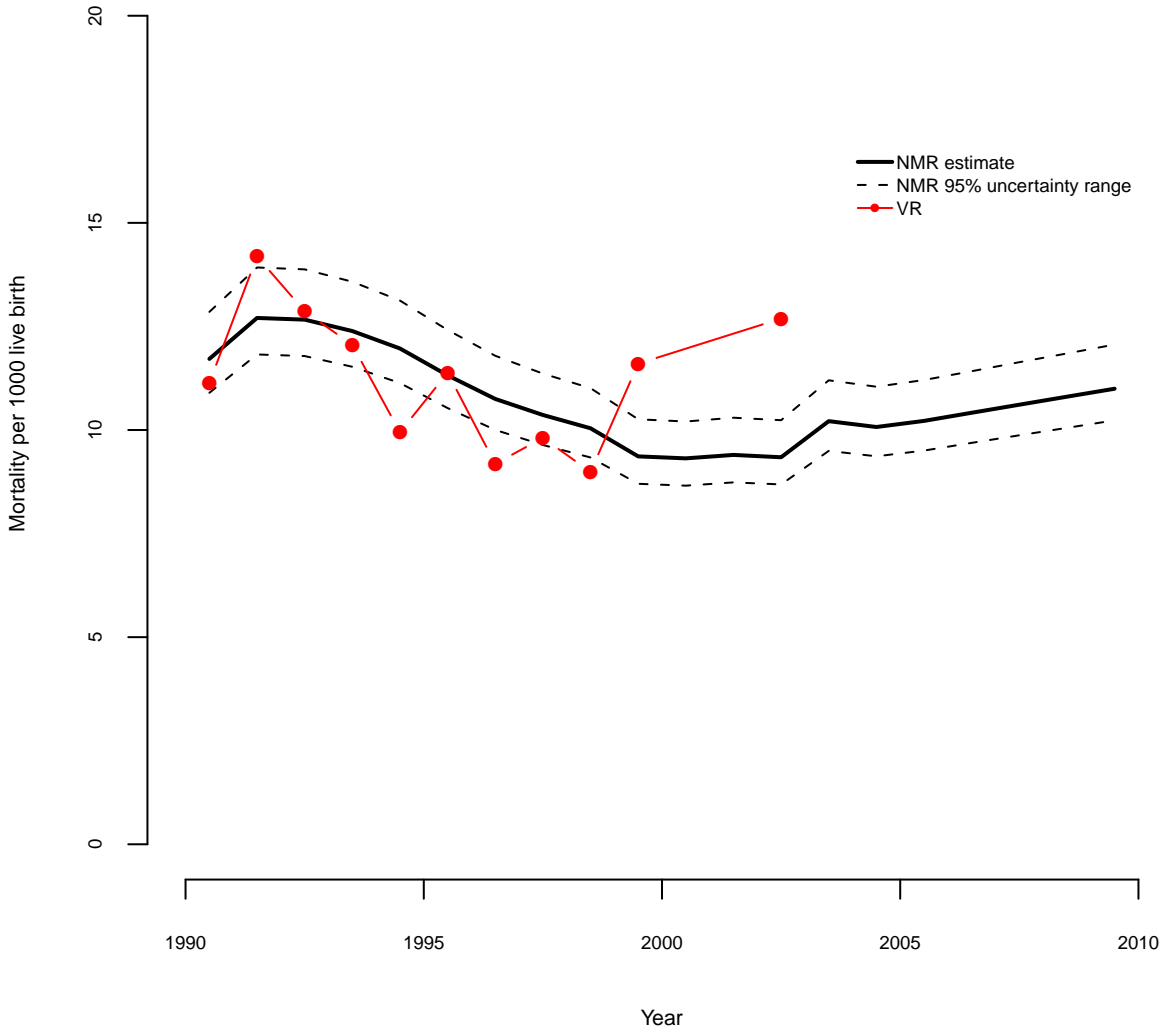

### Saint Lucia NMR and U5MR

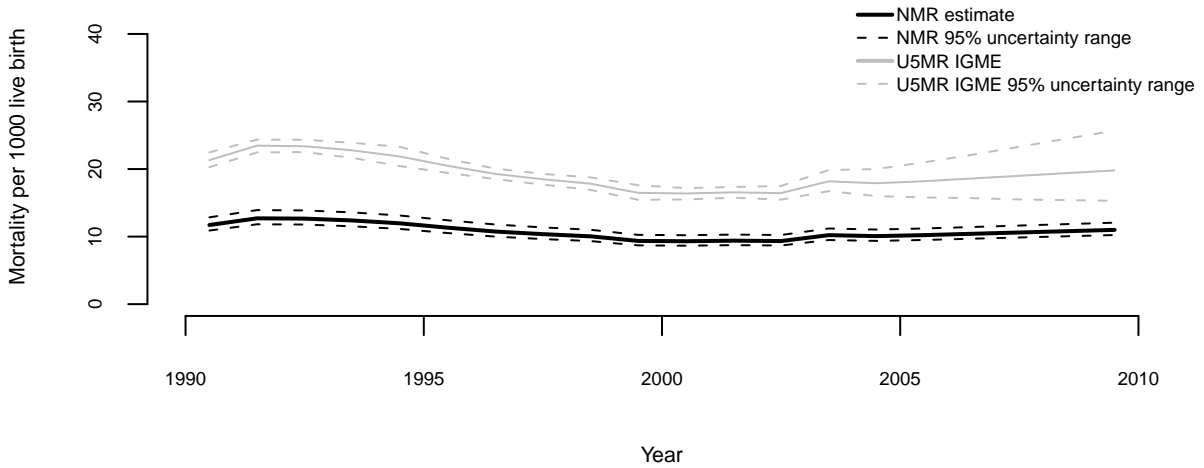

### Saint Lucia NMR as percentage of U5MR

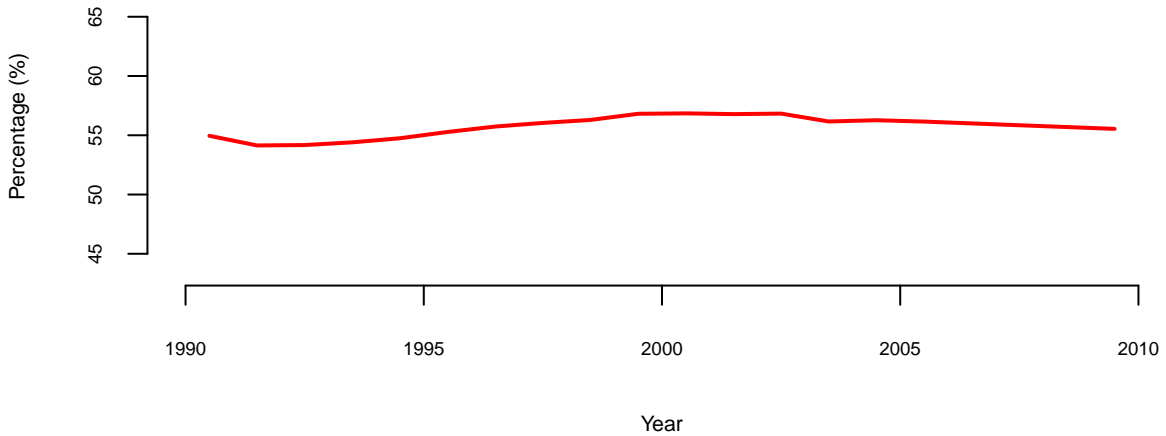

Saint Vincent and the Grenadines  
Data, and estimated NMR

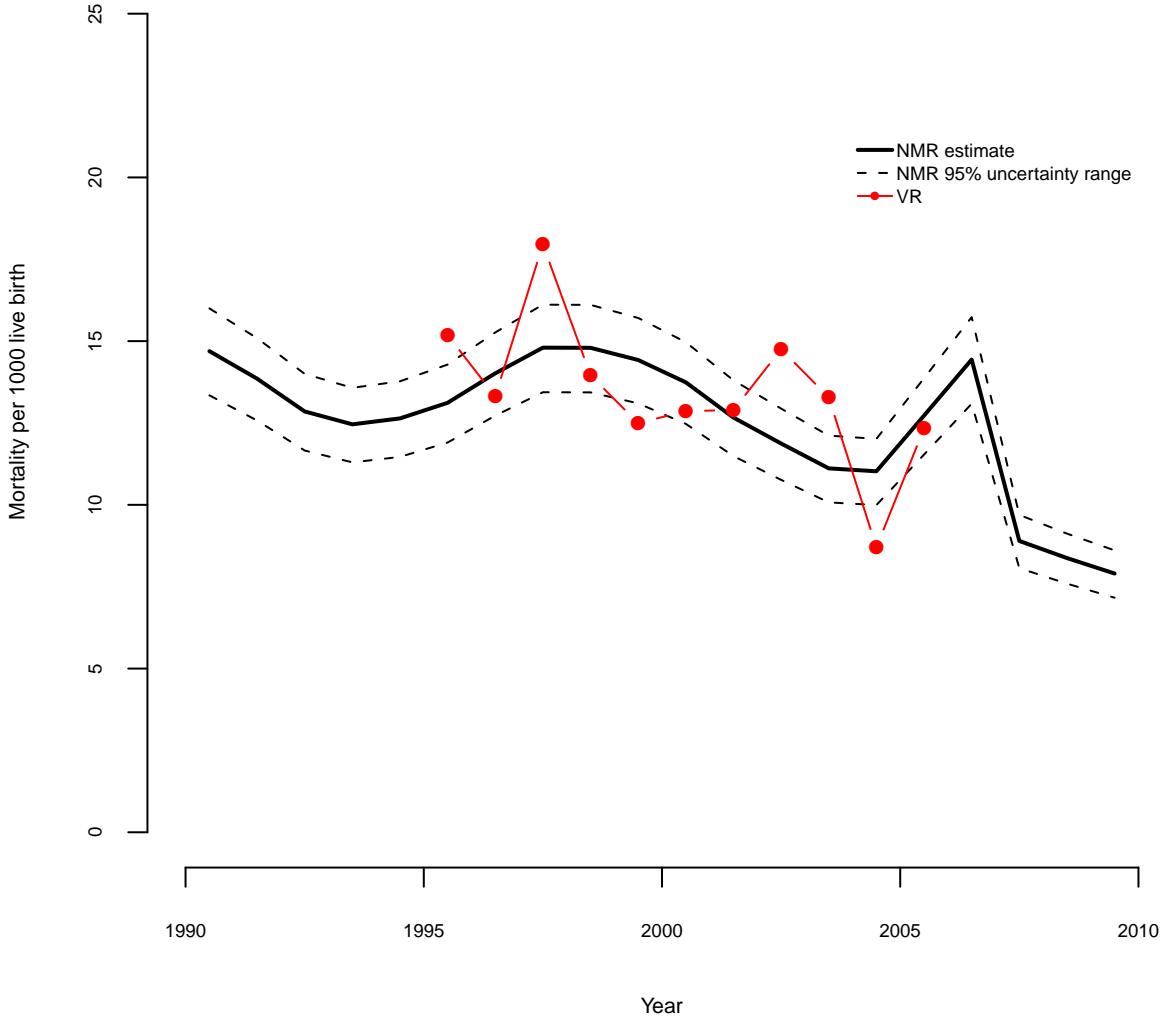

### Saint Vincent and the Grenadines NMR and U5MR

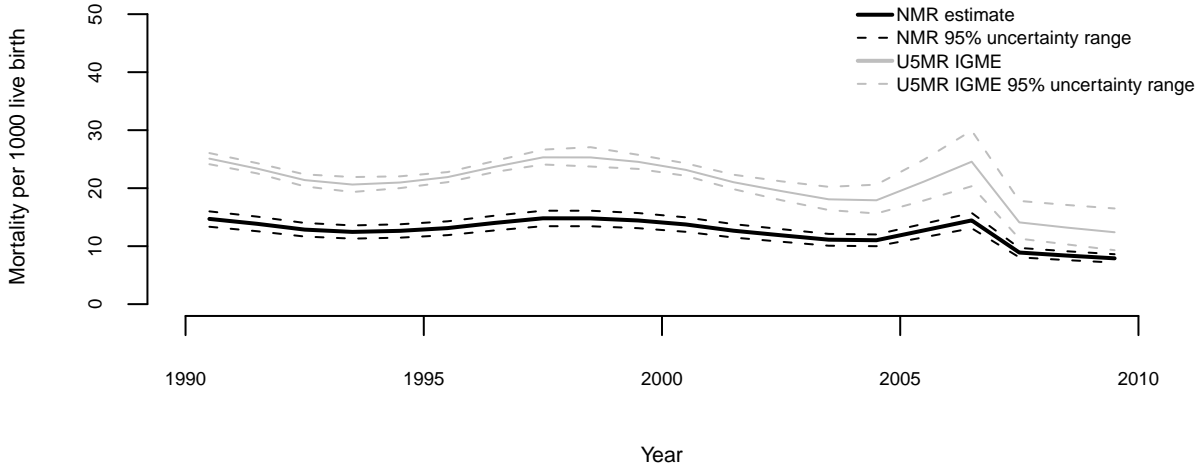

### Saint Vincent and the Grenadines NMR as percentage of U5MR

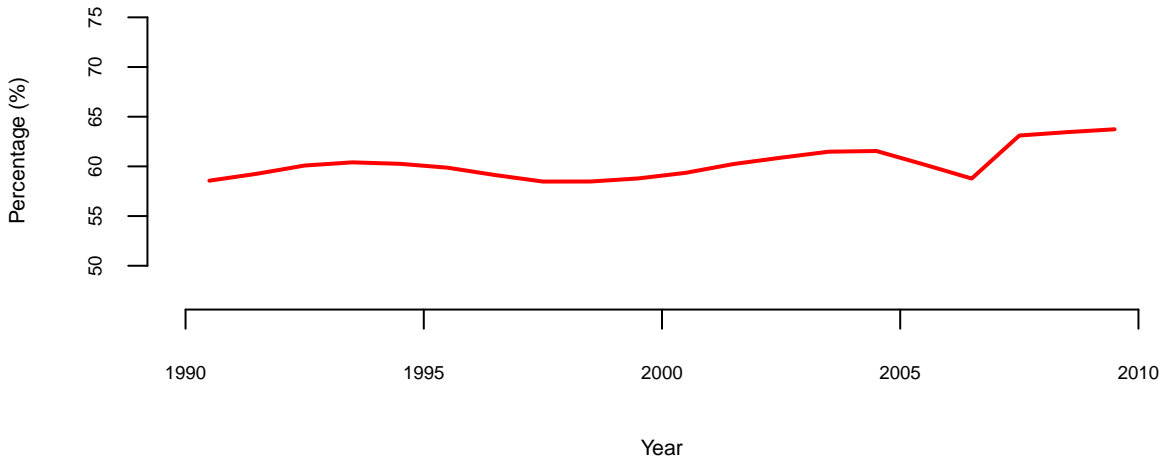

**Samoa**  
**Data, and estimated NMR**

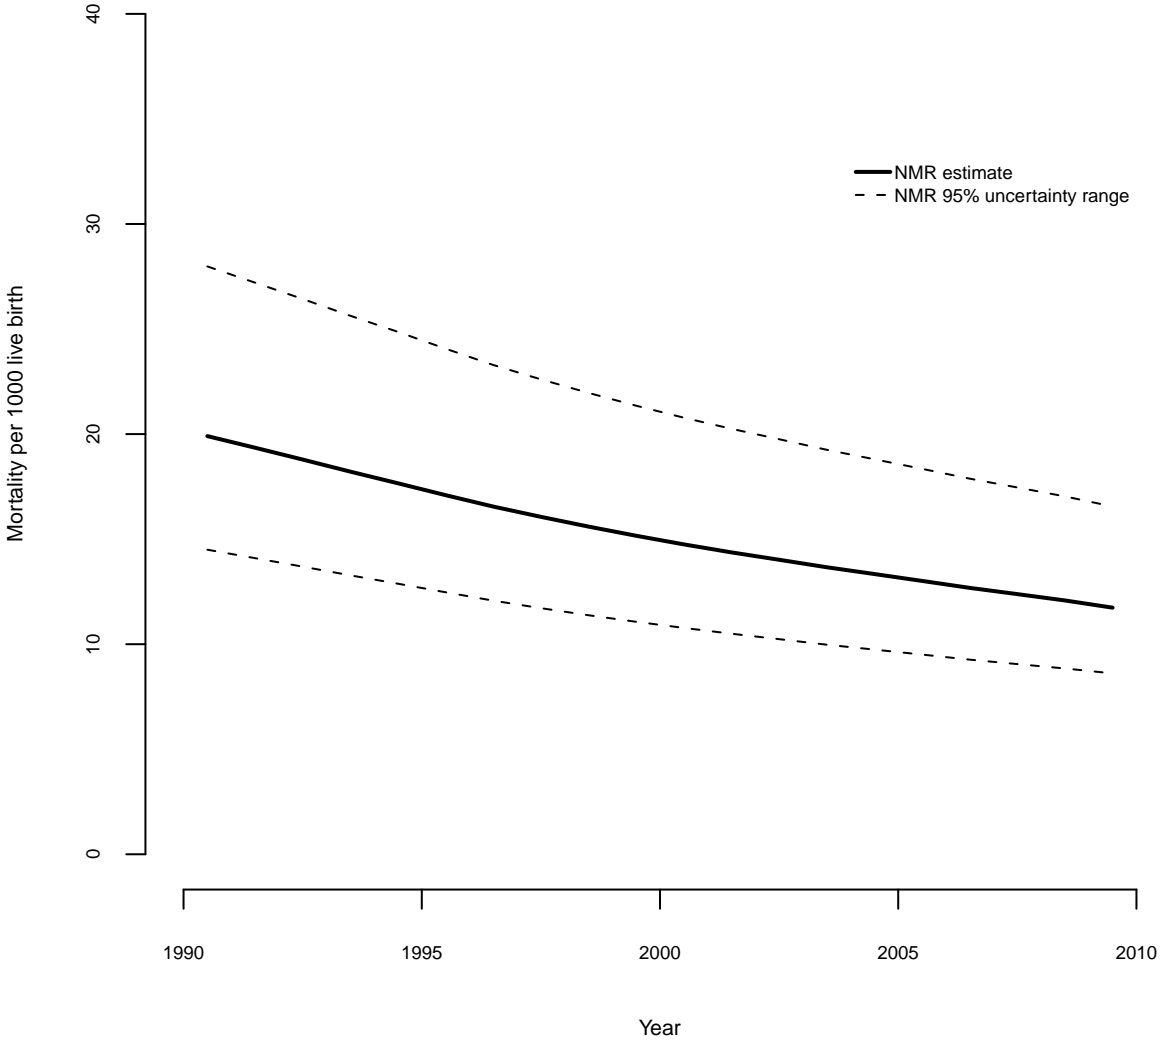

### Samoa NMR and U5MR

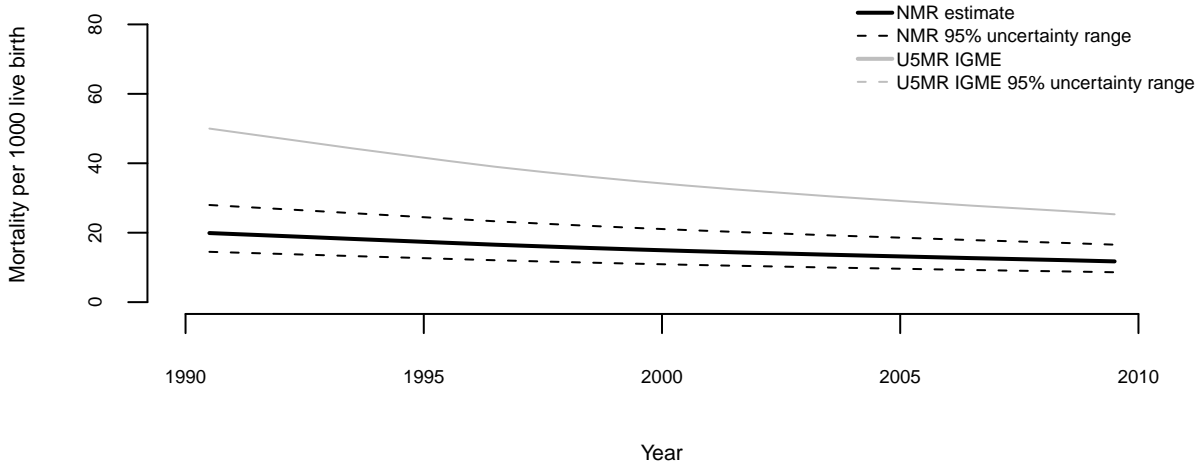

### Samoa NMR as percentage of U5MR

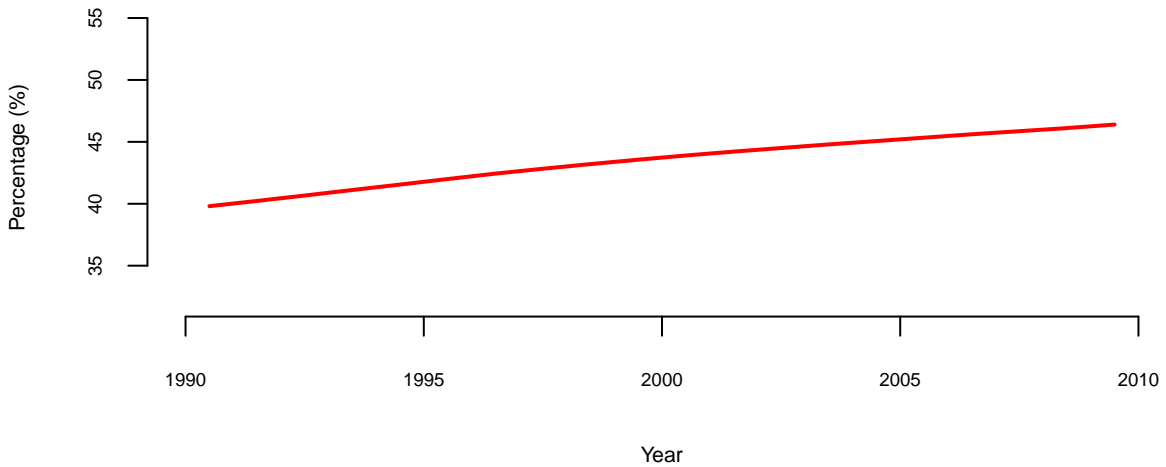

San Marino  
Data, and estimated NMR

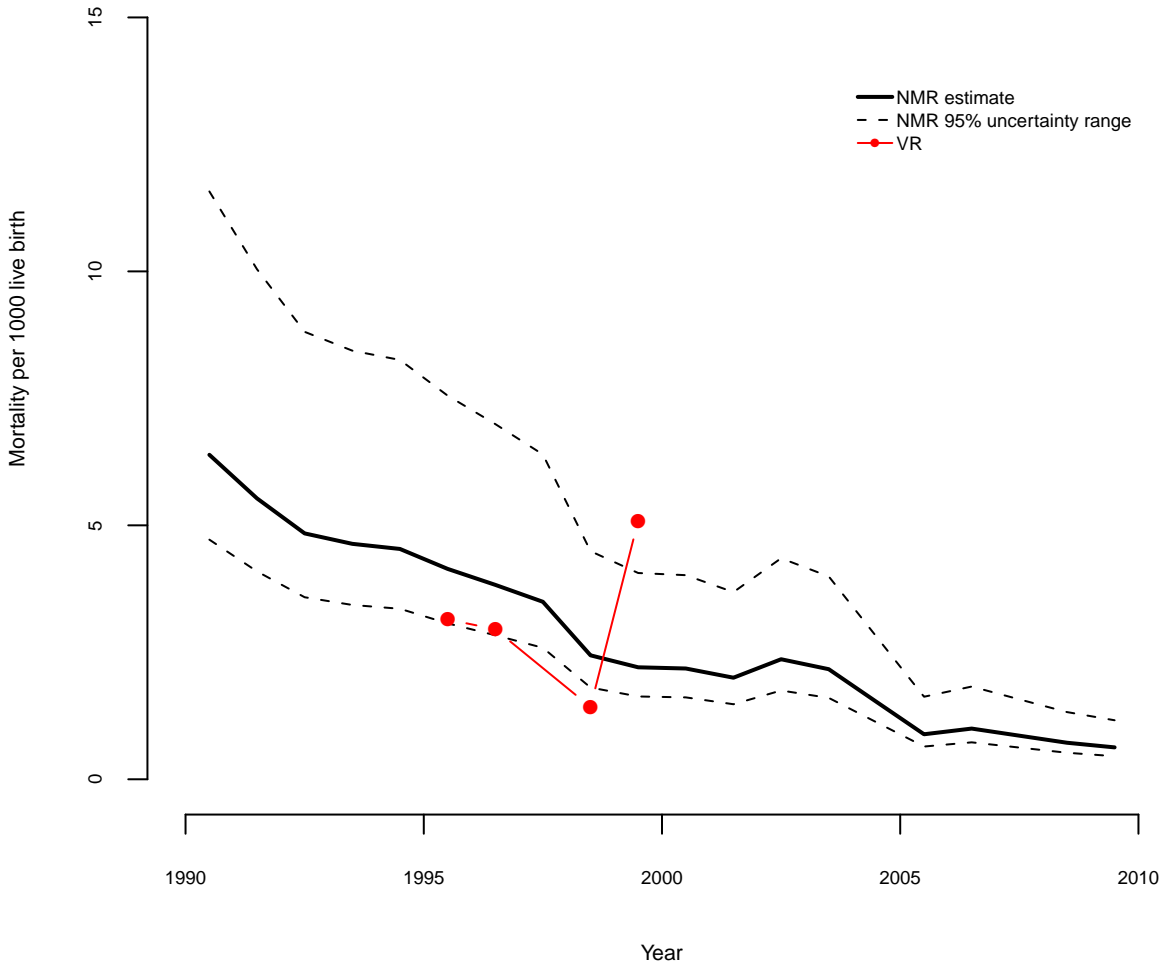

### San Marino NMR and U5MR

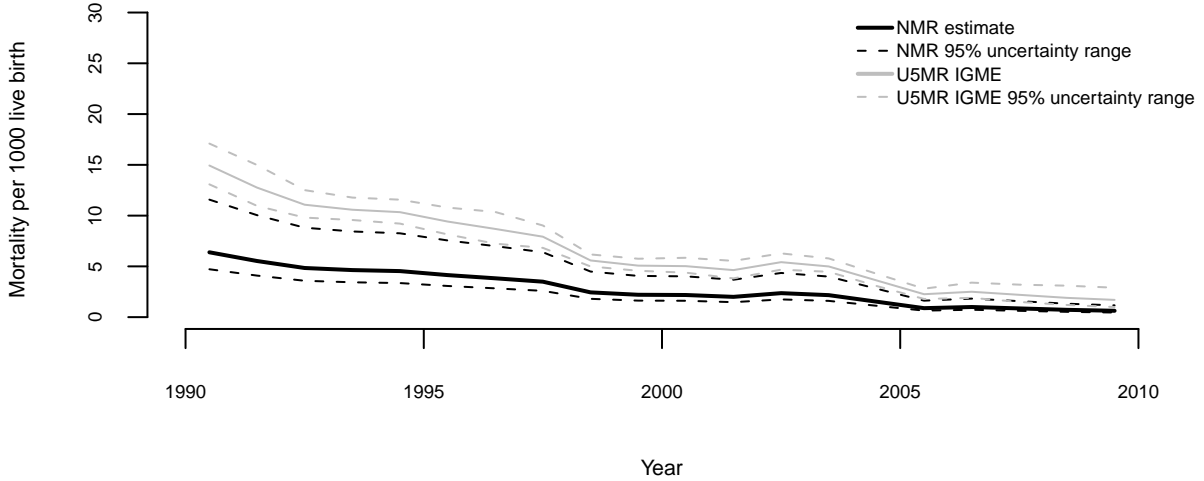

### San Marino NMR as percentage of U5MR

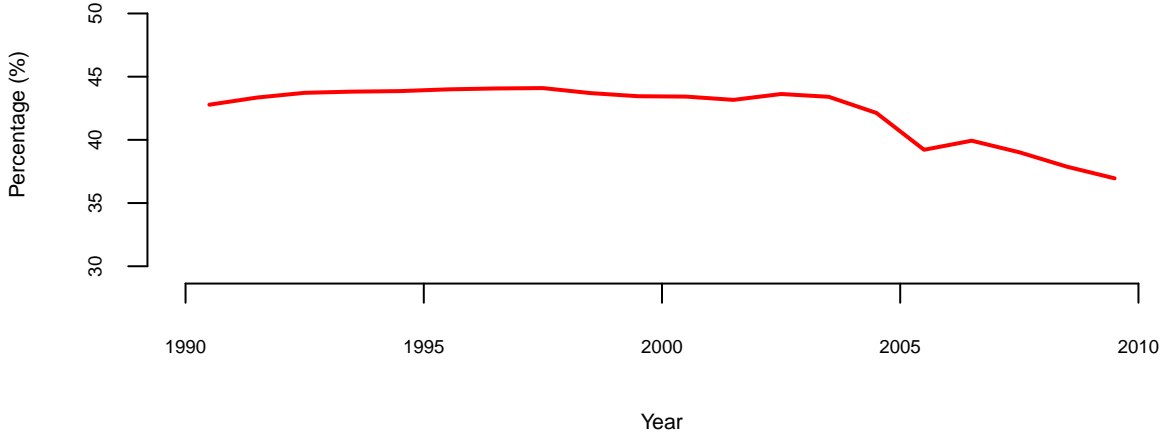



### Sao Tome and Principe Data, and estimated NMR

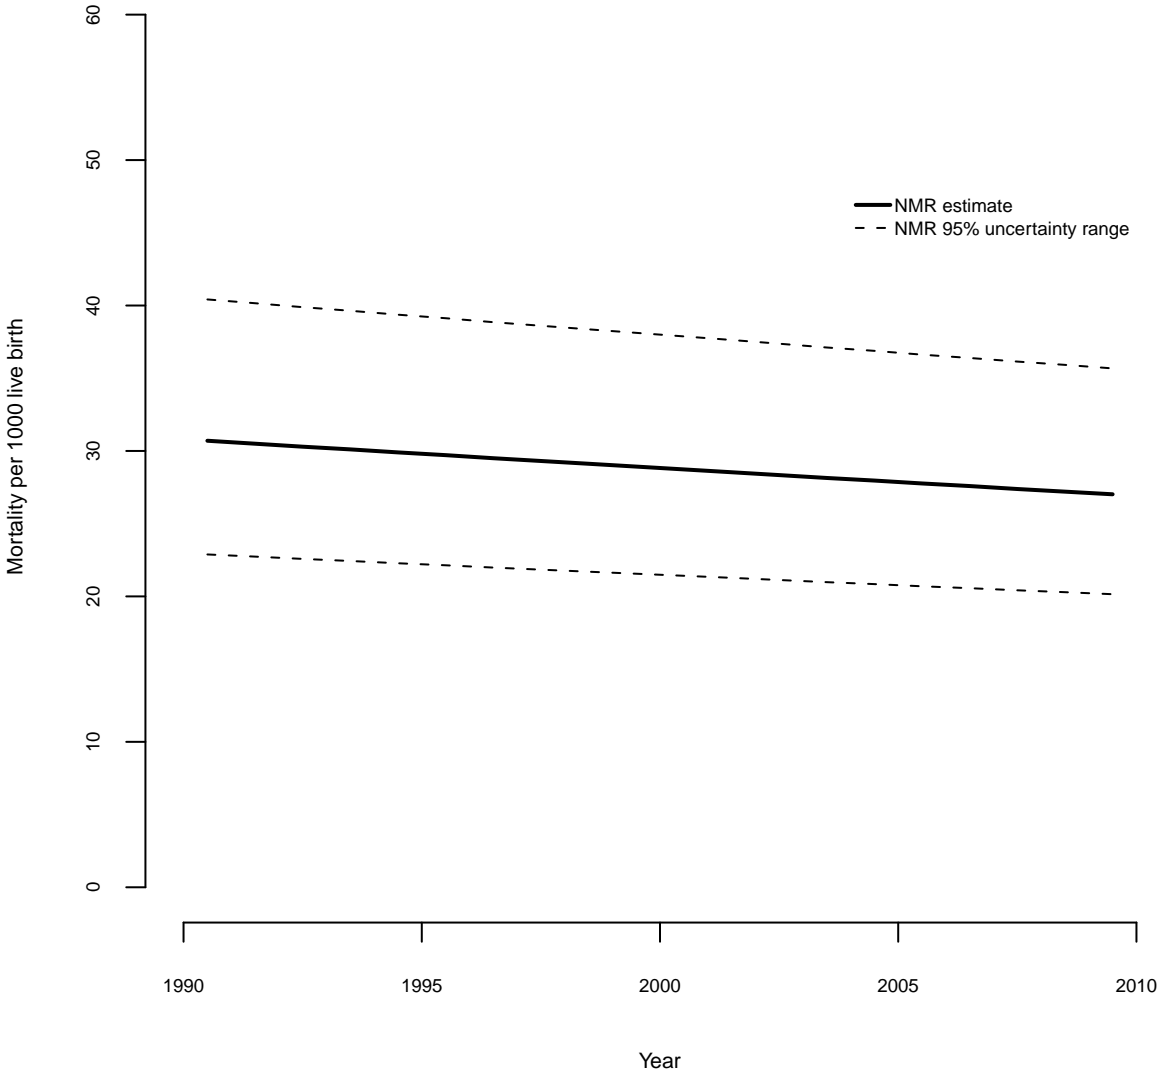

### Sao Tome and Principe NMR and U5MR

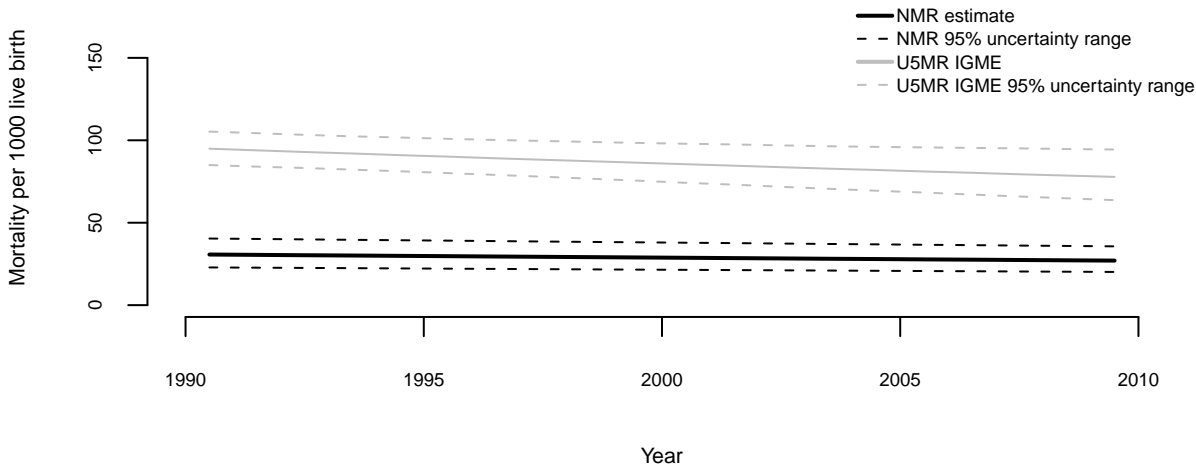

### Sao Tome and Principe NMR as percentage of U5MR

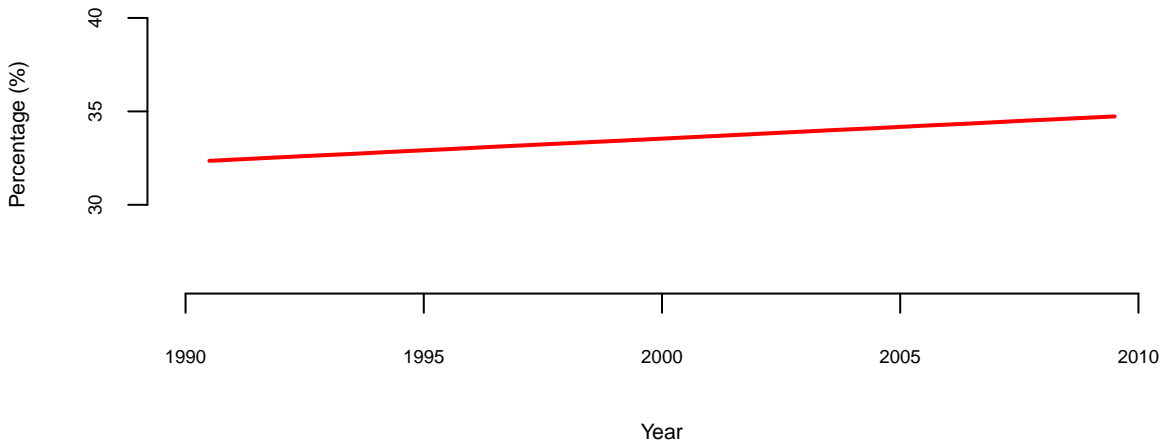

**Saudi Arabia**  
**Data, and estimated NMR**

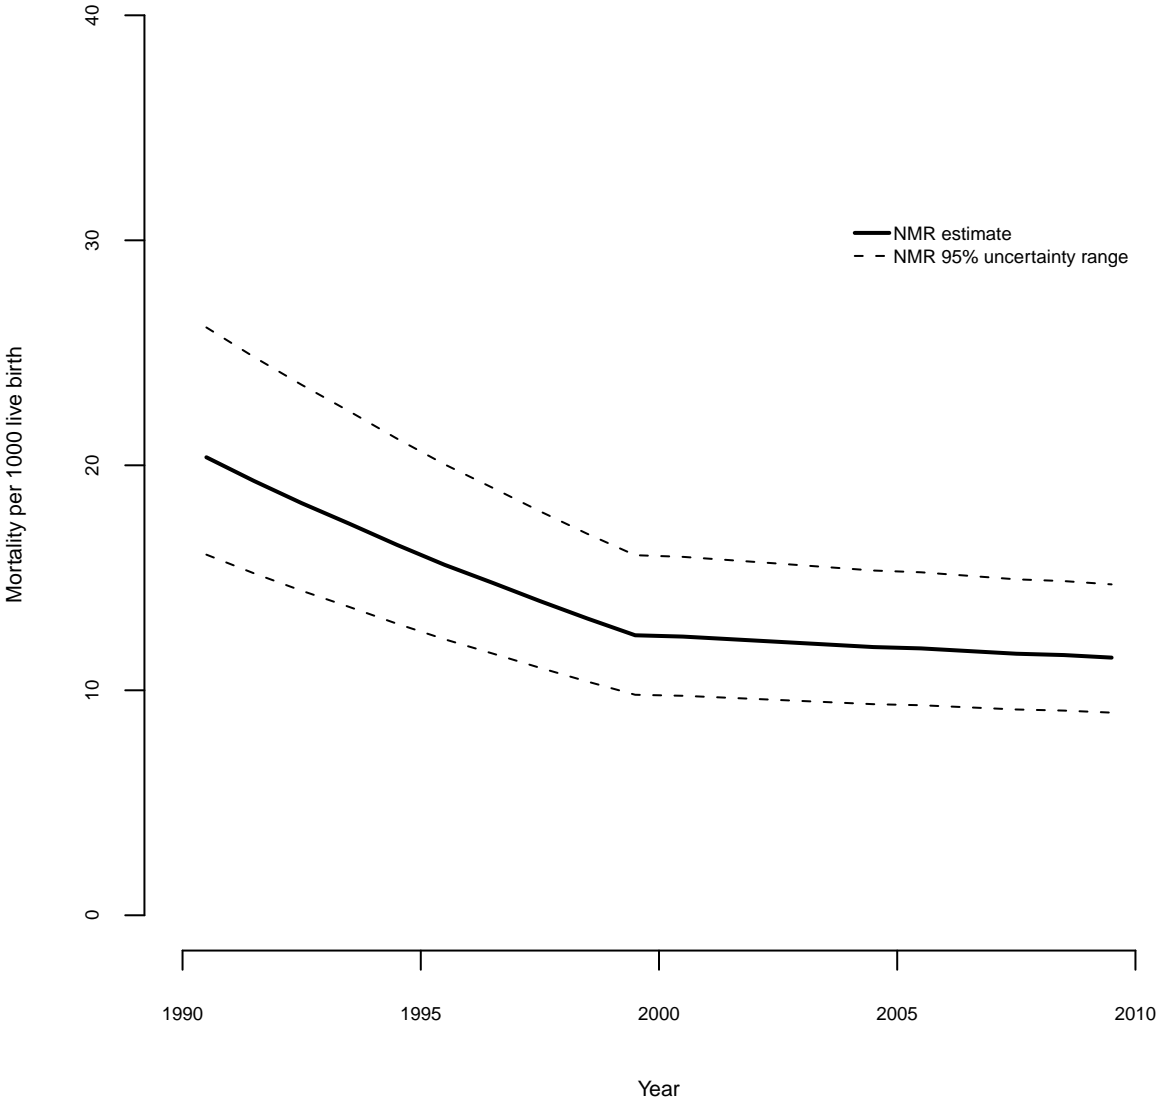

### Saudi Arabia NMR and U5MR

- NMR estimate
- - NMR 95% uncertainty range
- U5MR IGME
- - U5MR IGME 95% uncertainty range

Mortality per 1000 live birth

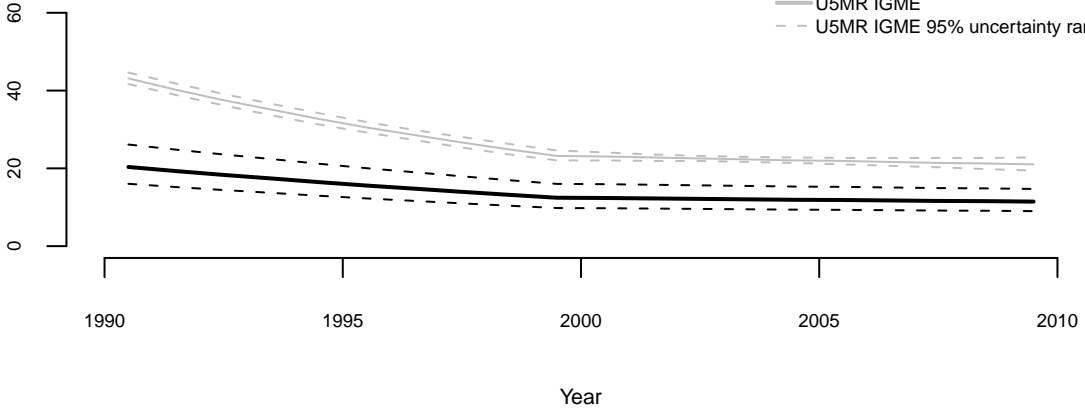

### Saudi Arabia NMR as percentage of U5MR

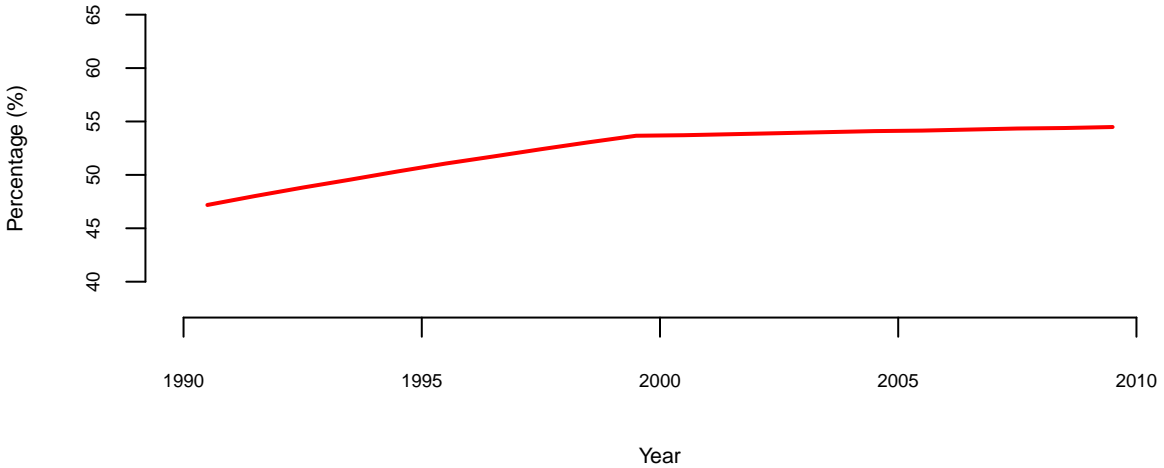

# Senegal

## Data, and estimated NMR

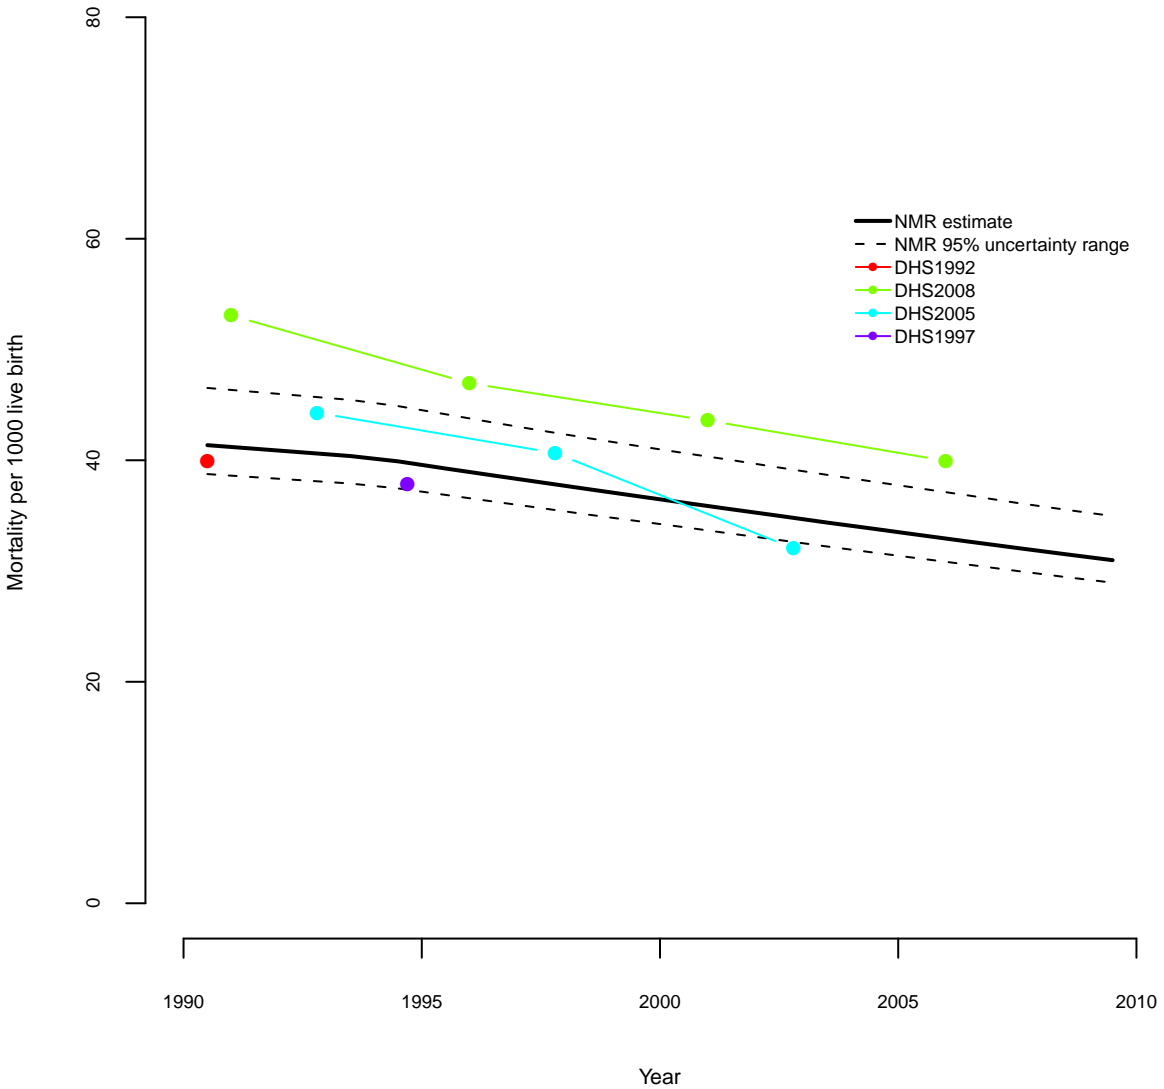

### Senegal NMR and U5MR

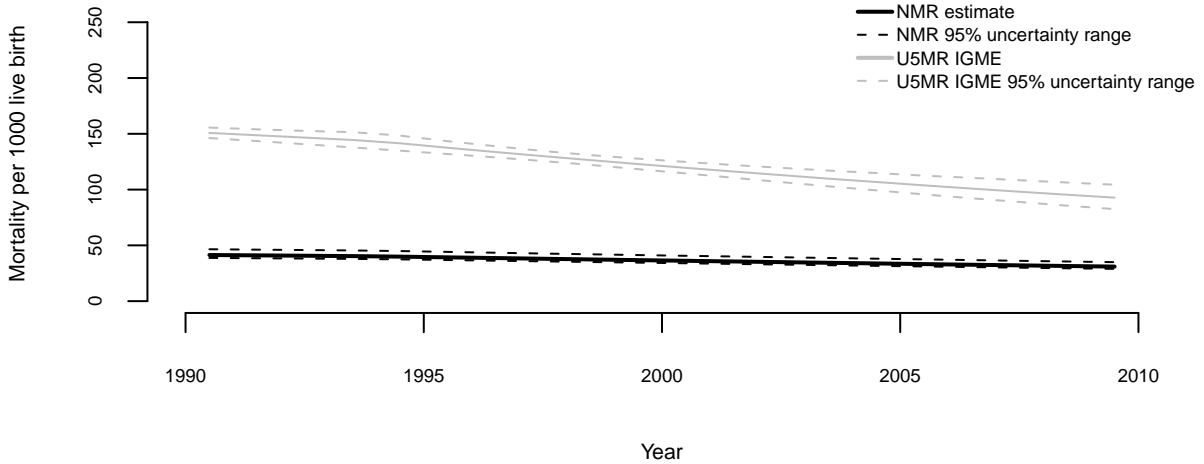

### Senegal NMR as percentage of U5MR

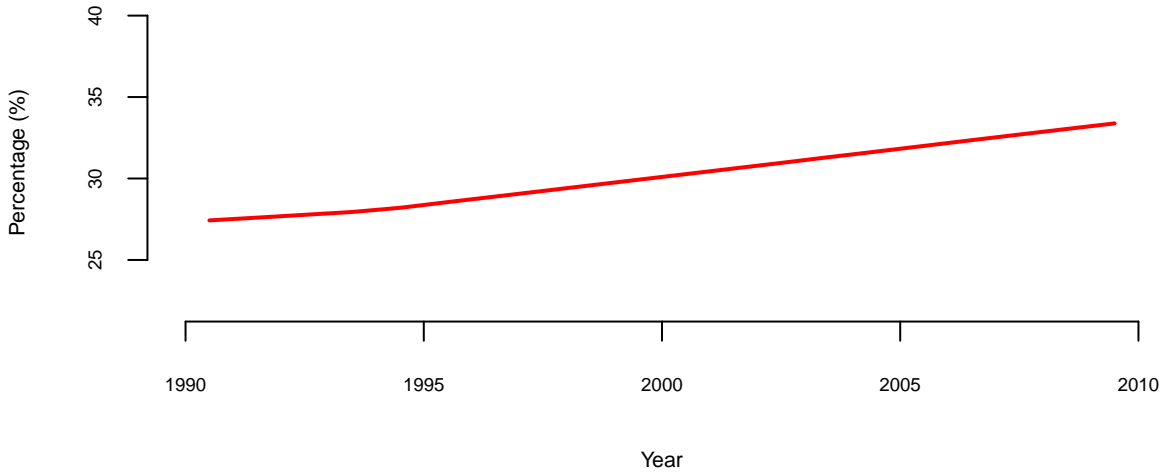

**Serbia**  
**Data, and estimated NMR**

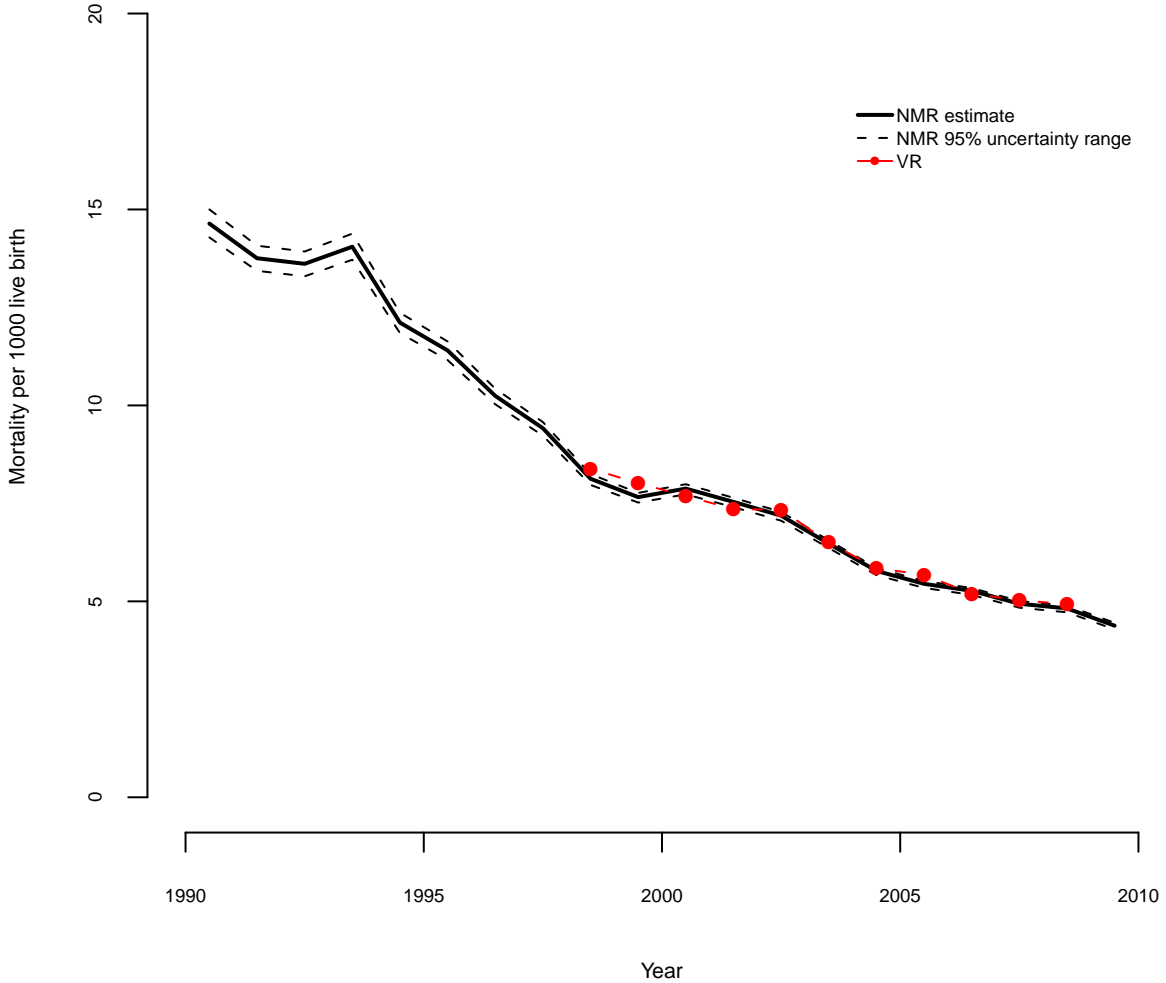

### Serbia NMR and U5MR

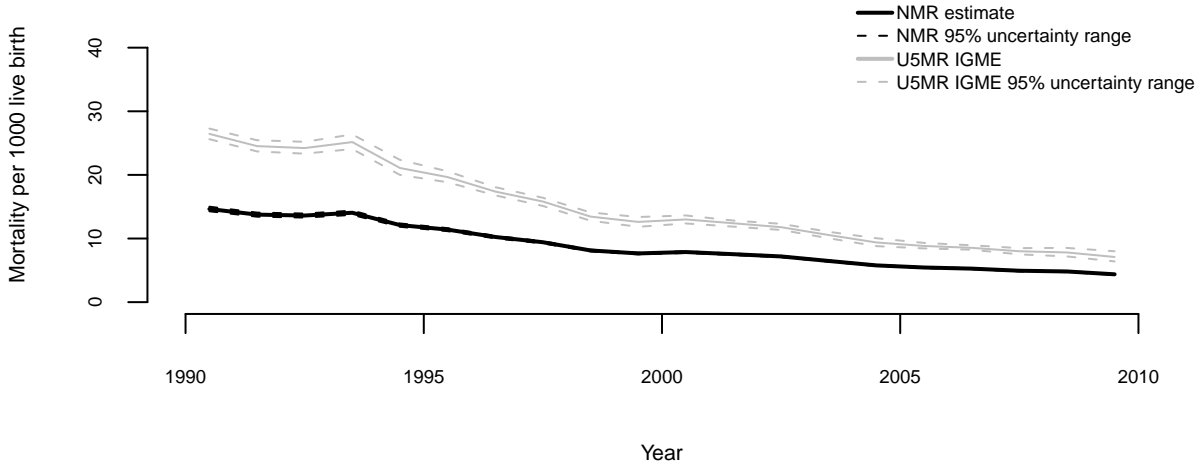

### Serbia NMR as percentage of U5MR

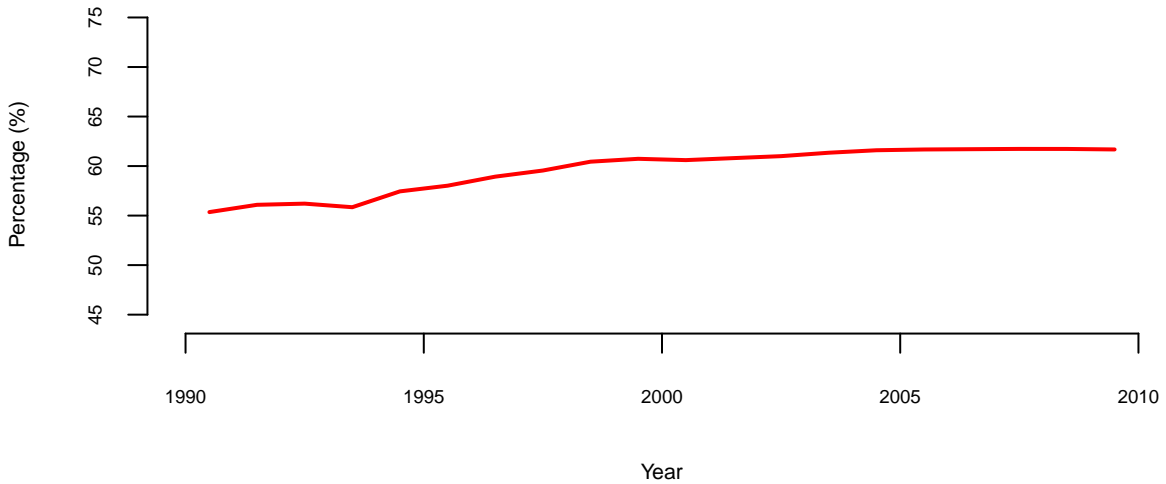



# Seychelles

## Data, and estimated NMR

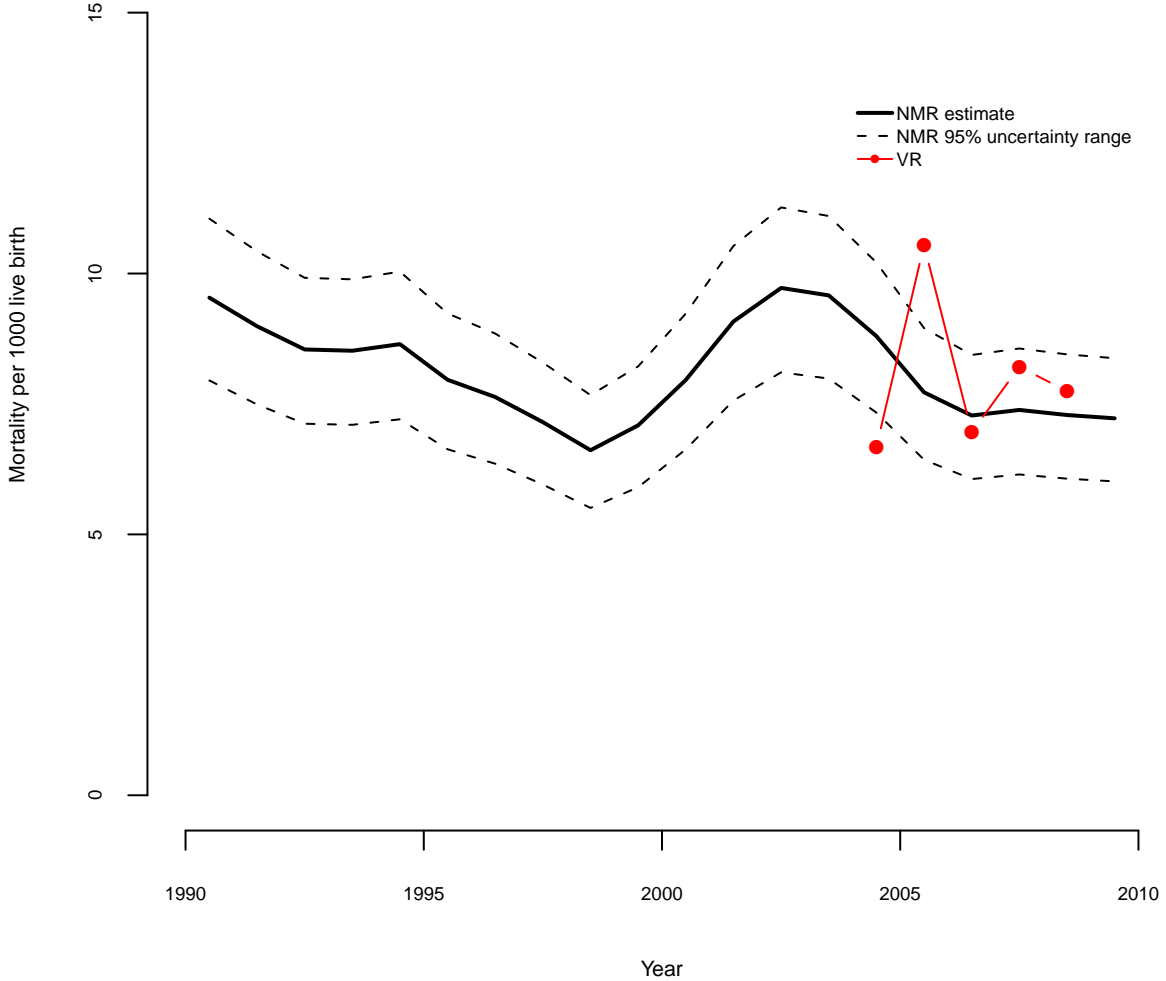

### Seychelles NMR and U5MR

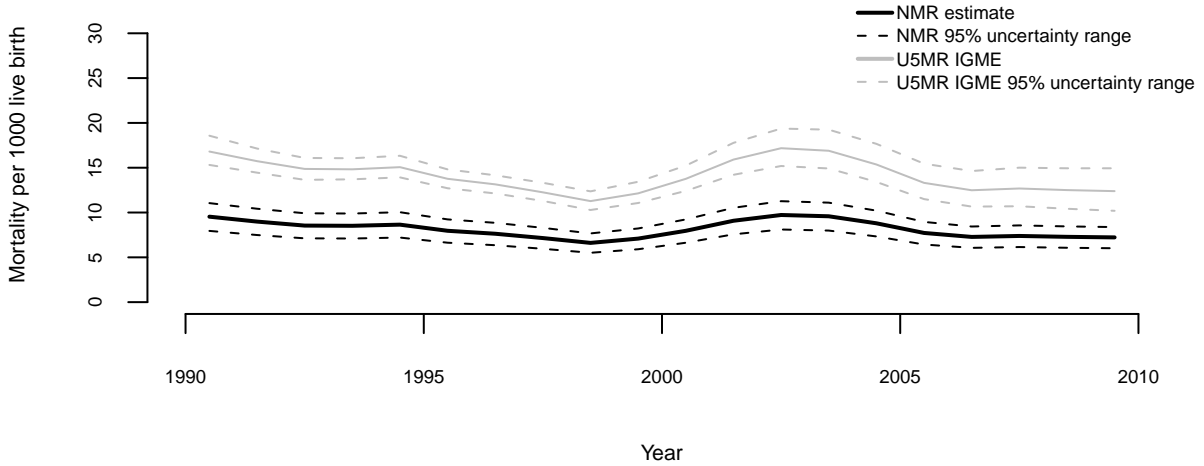

### Seychelles NMR as percentage of U5MR

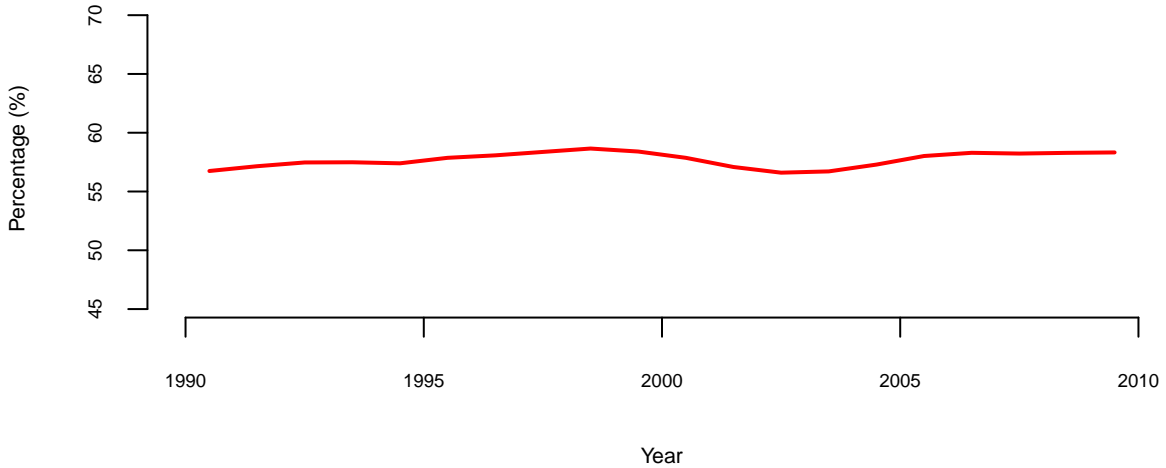

### Sierra Leone Data, and estimated NMR

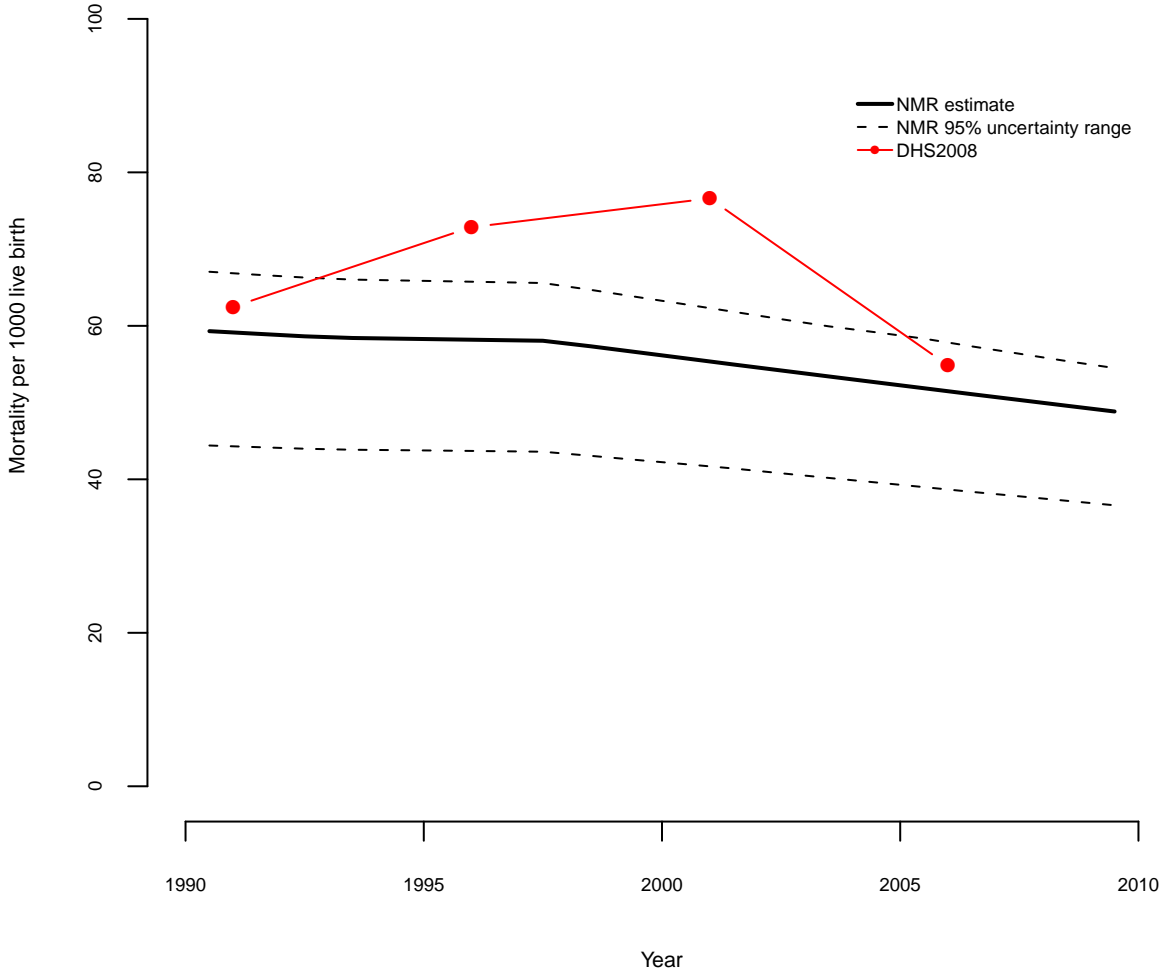

### Sierra Leone NMR and U5MR

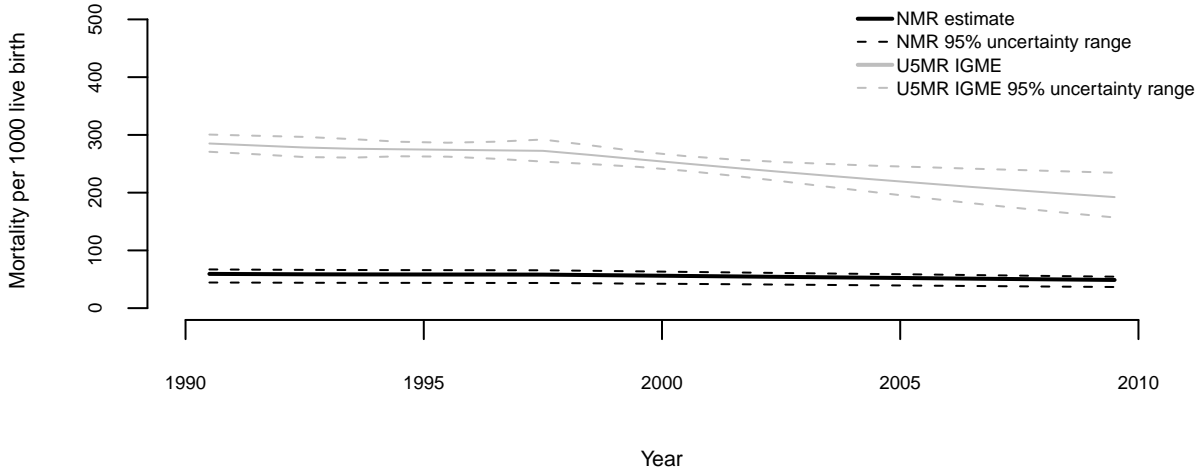

### Sierra Leone NMR as percentage of U5MR

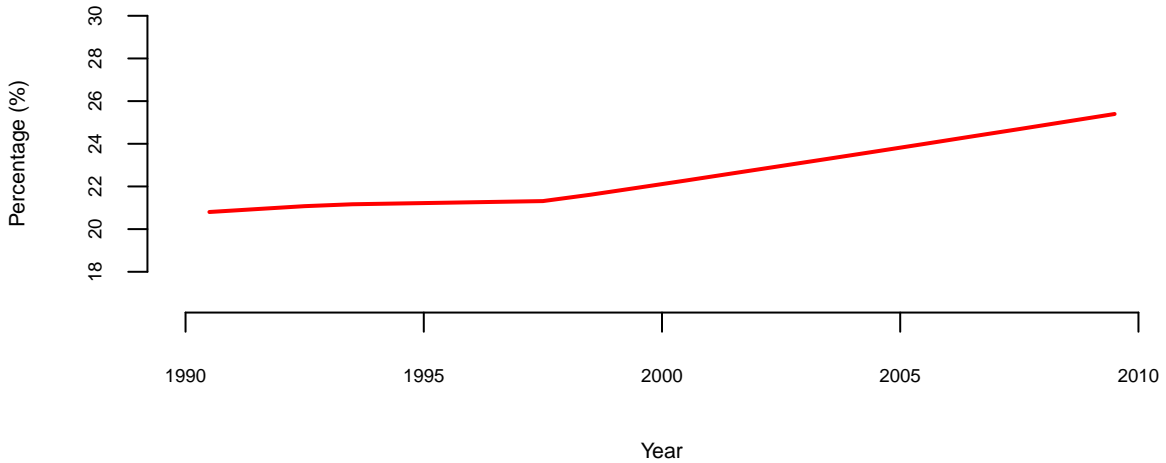

# Singapore

## Data, and estimated NMR

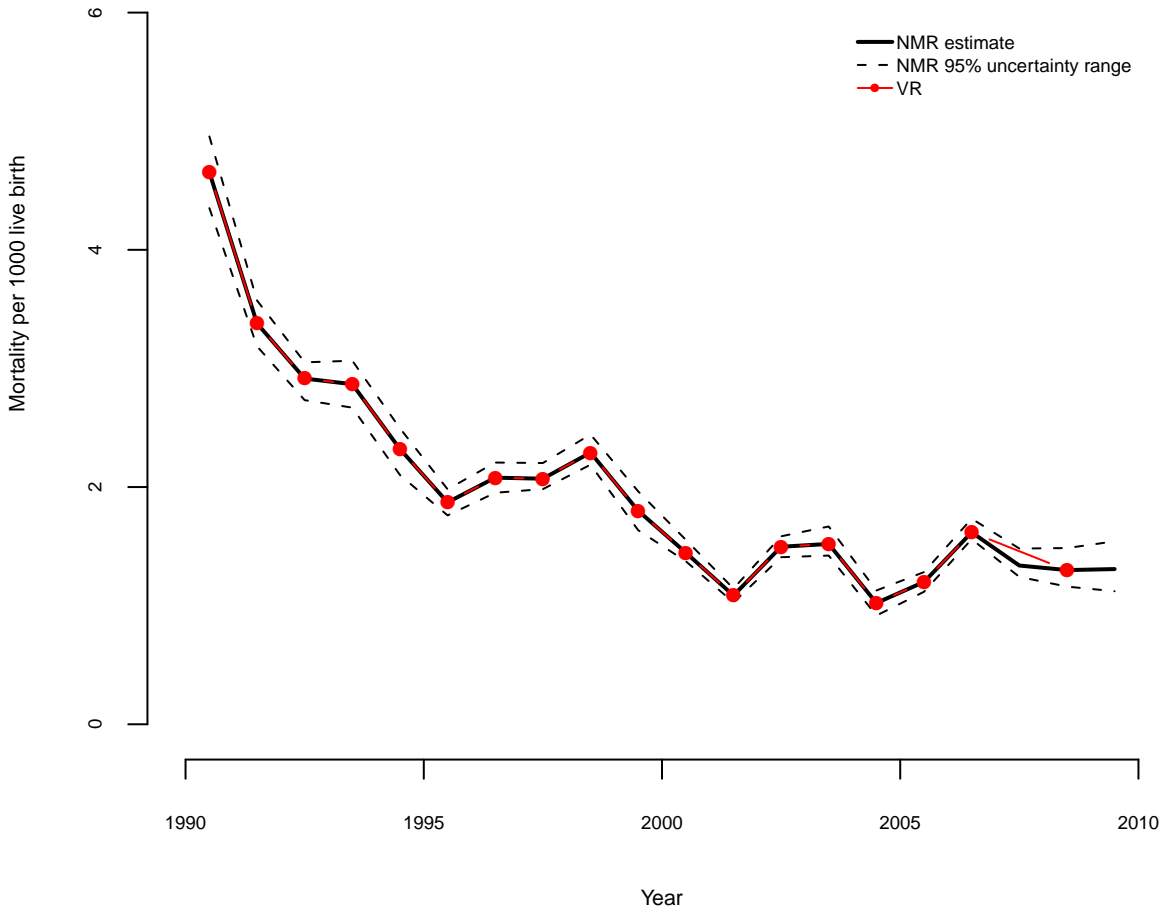

### Singapore NMR and U5MR

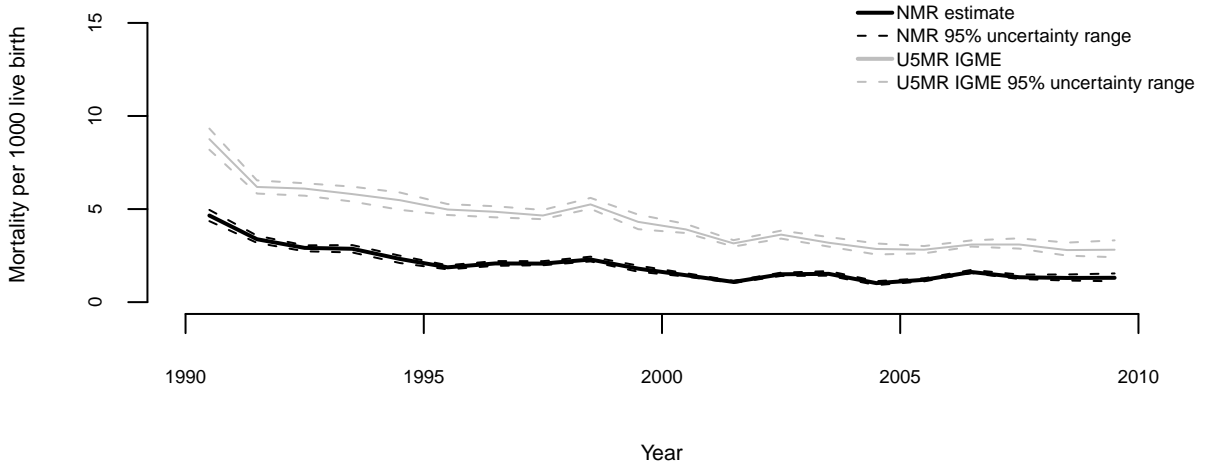

### Singapore NMR as percentage of U5MR

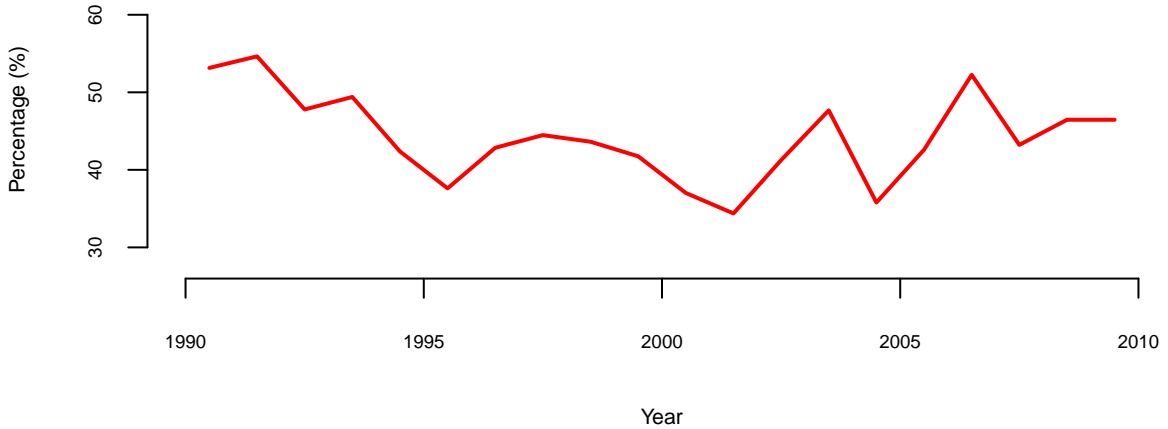

Slovakia  
Data, and estimated NMR

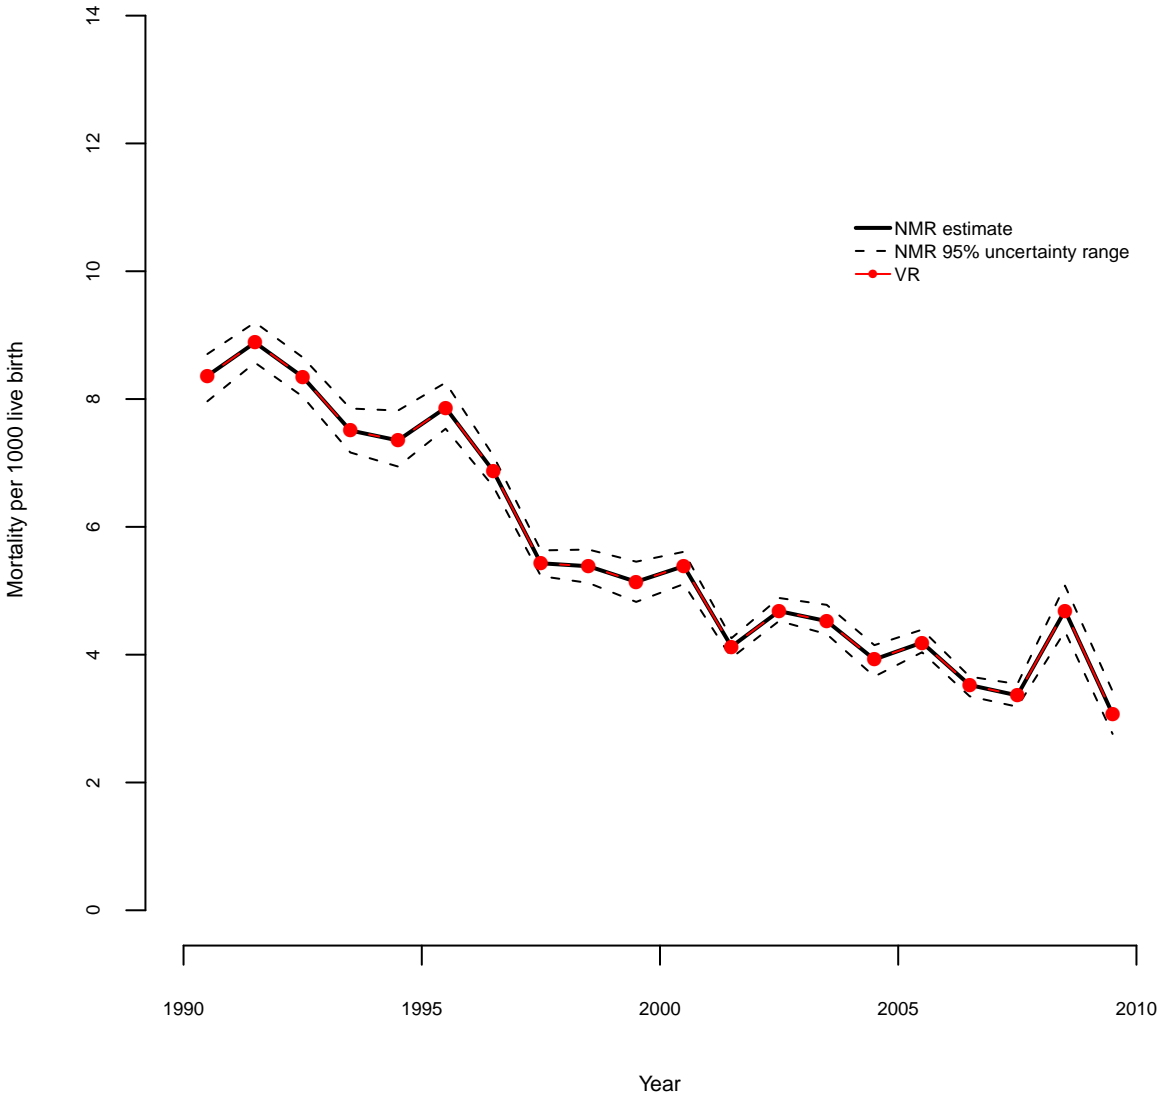

### Slovakia NMR and U5MR

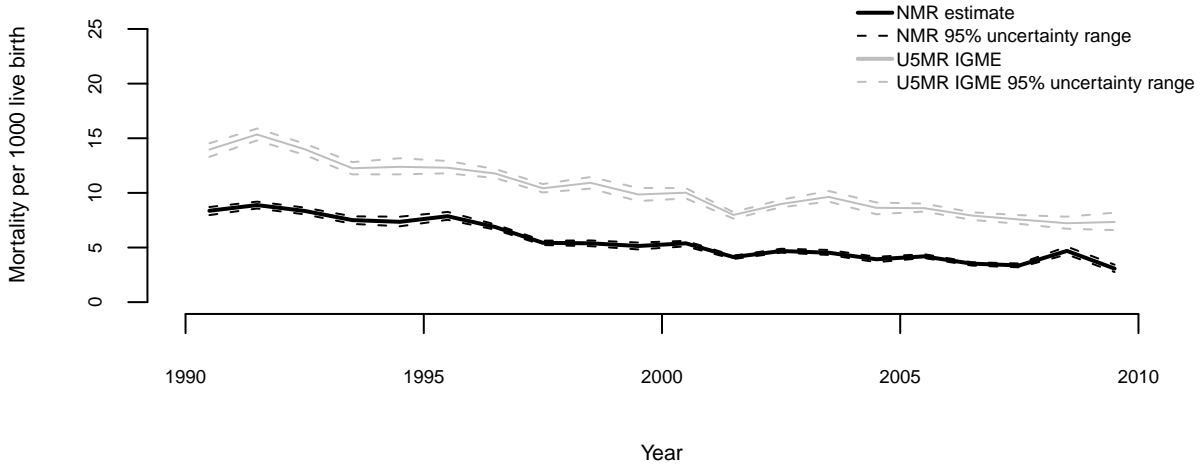

### Slovakia NMR as percentage of U5MR

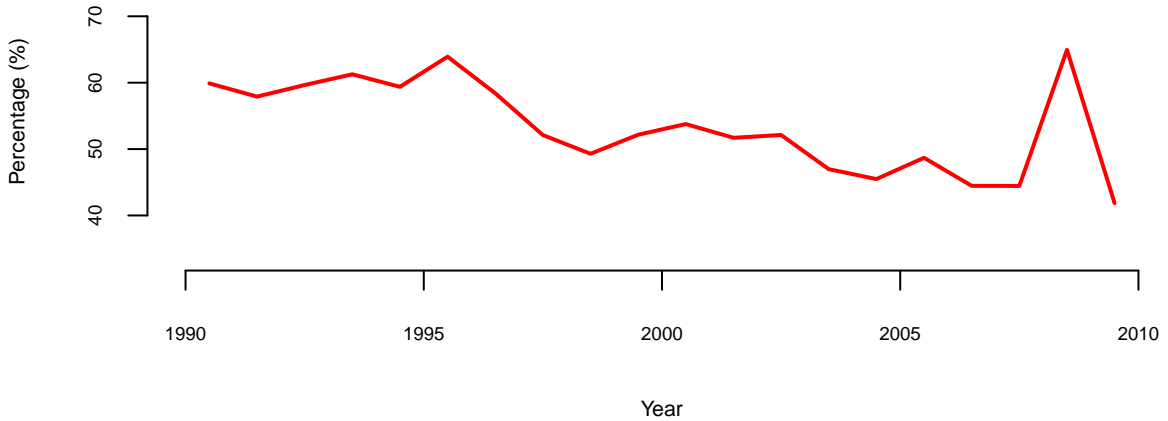



### Slovenia Data, and estimated NMR

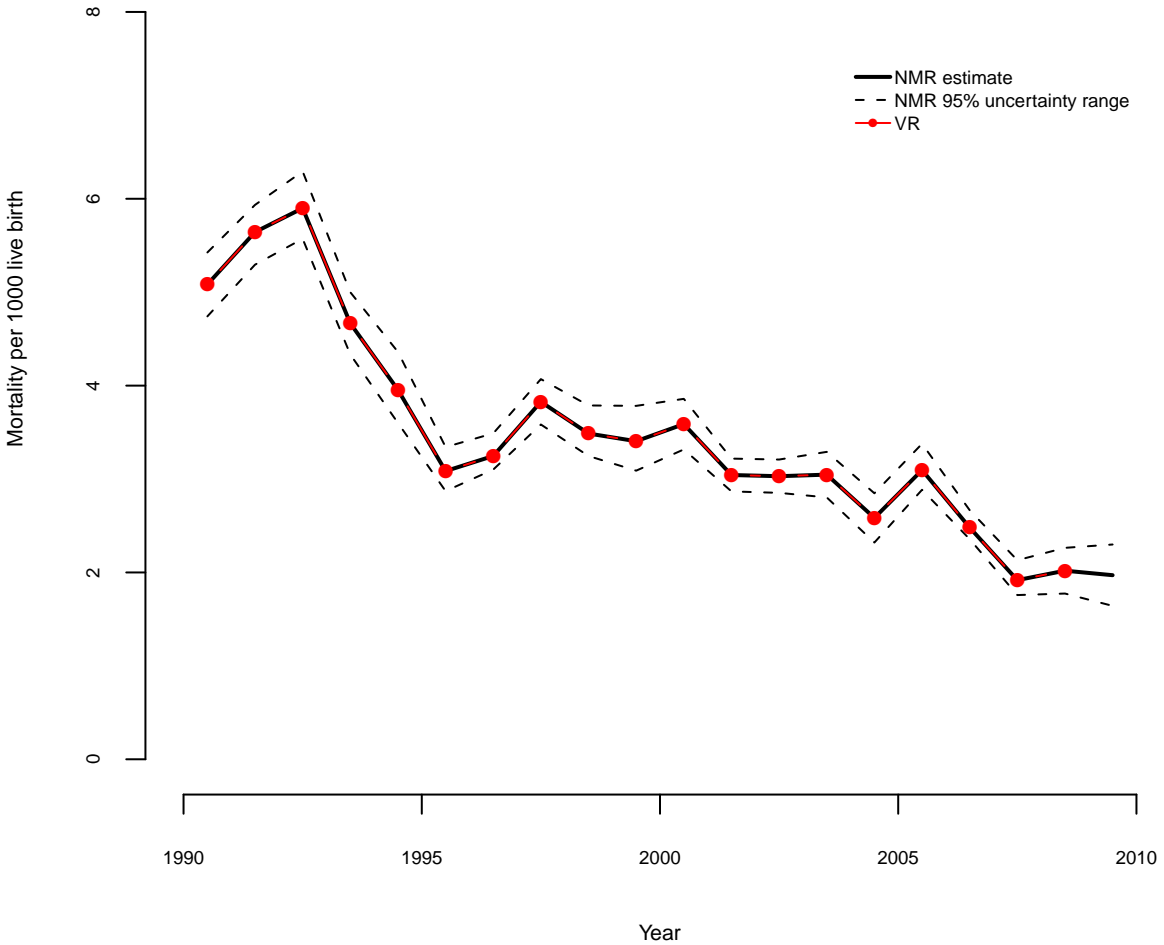

### Slovenia NMR and U5MR

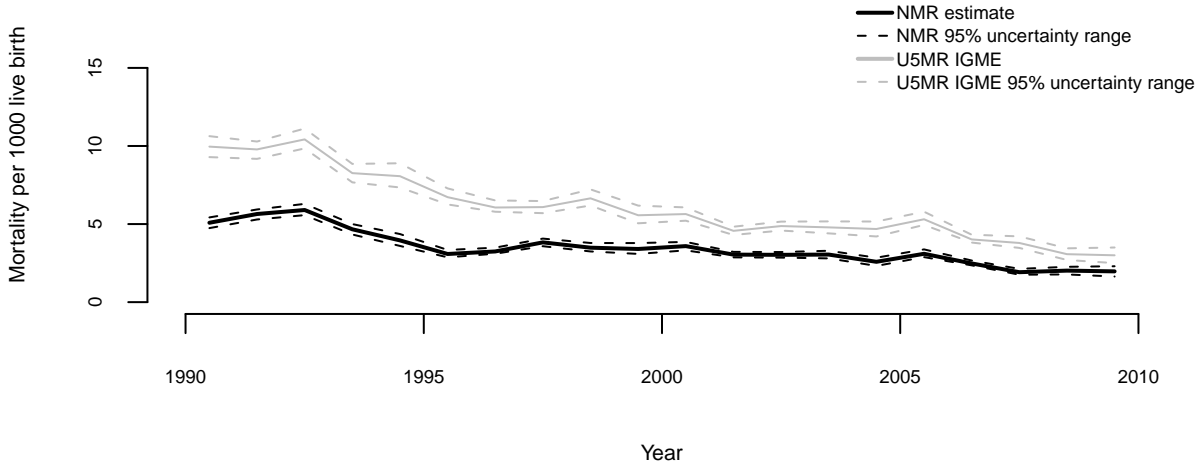

### Slovenia NMR as percentage of U5MR

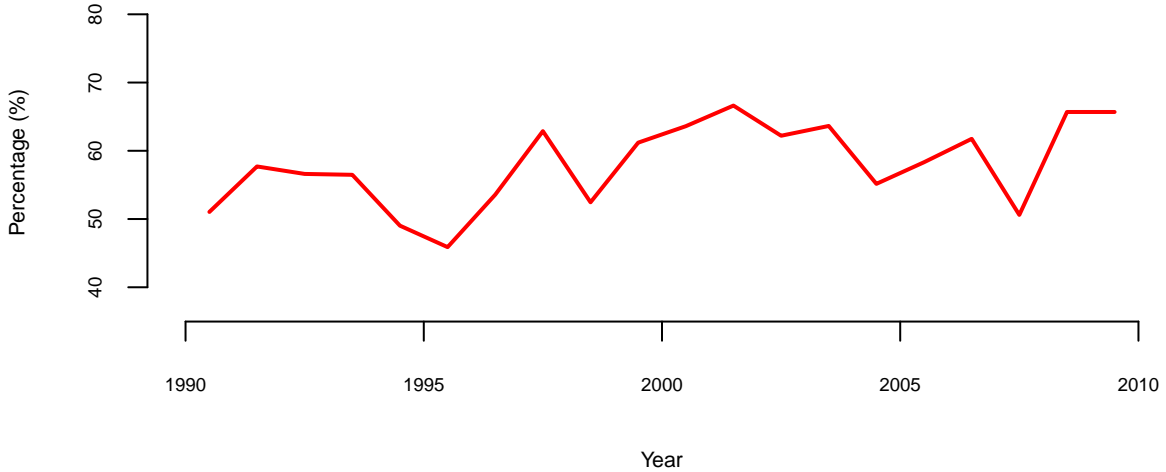

**Solomon Islands**  
**Data, and estimated NMR**

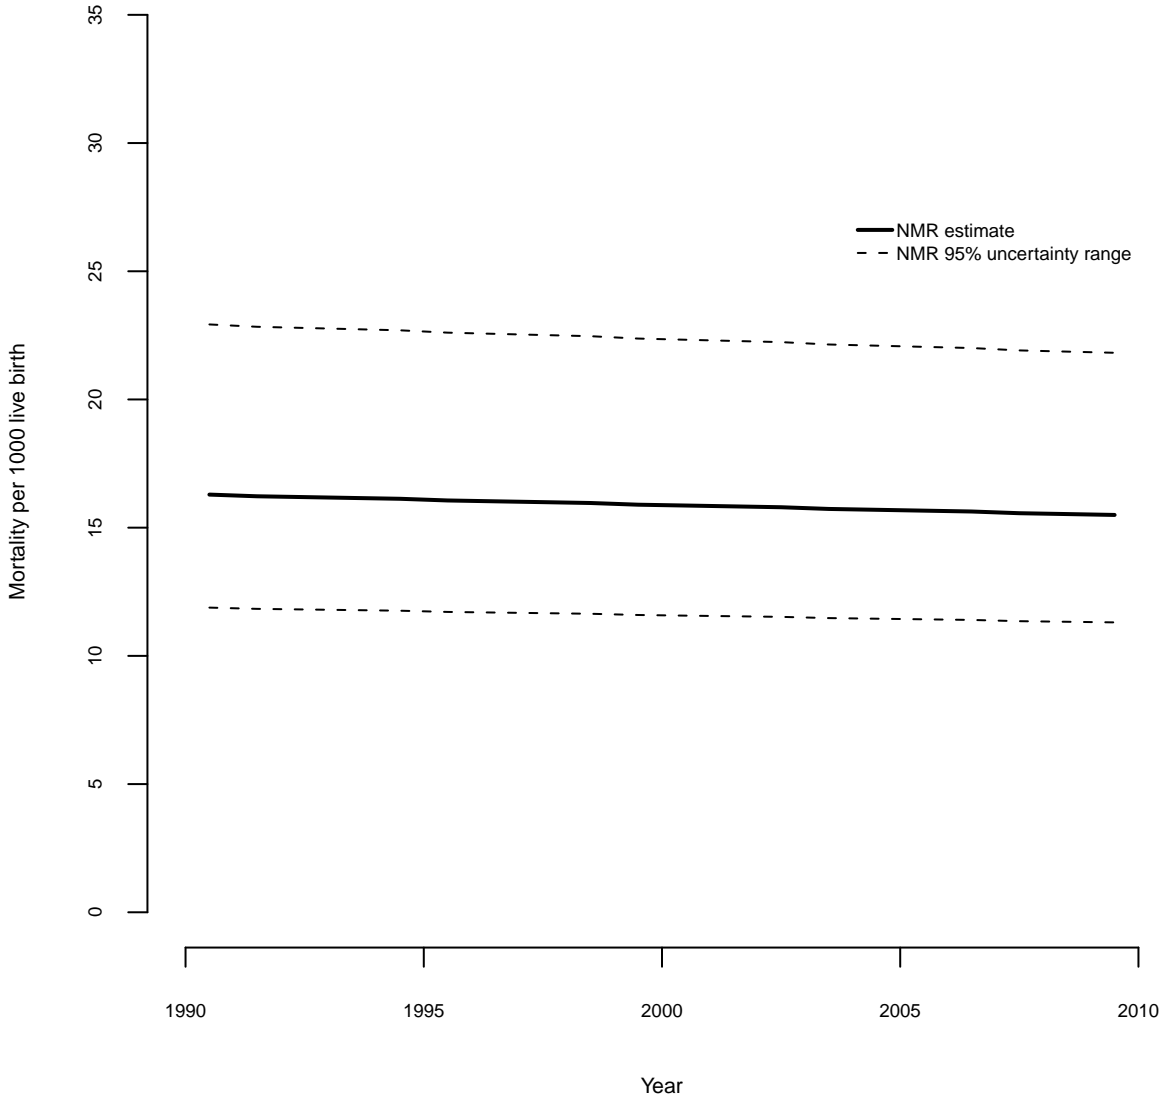

### Solomon Islands NMR and U5MR

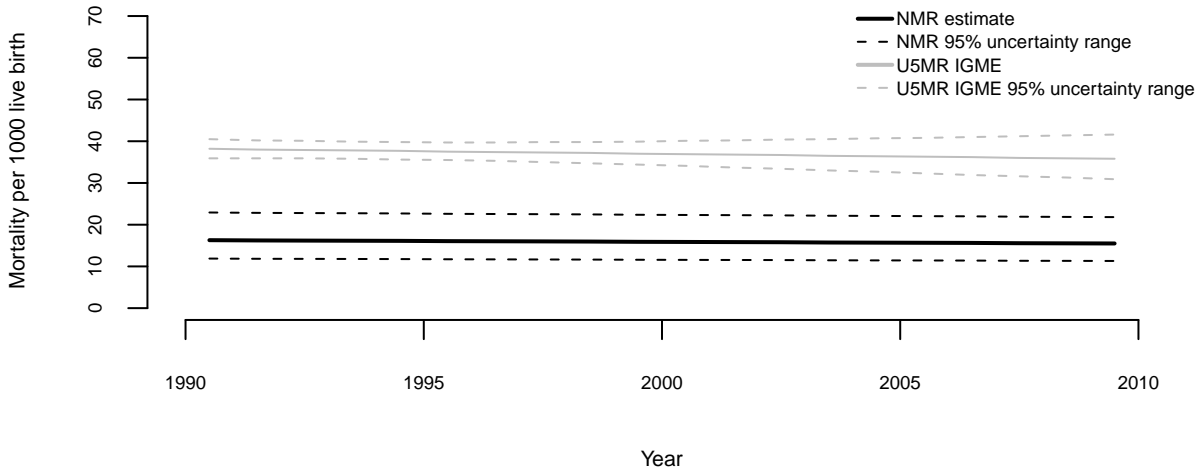

### Solomon Islands NMR as percentage of U5MR

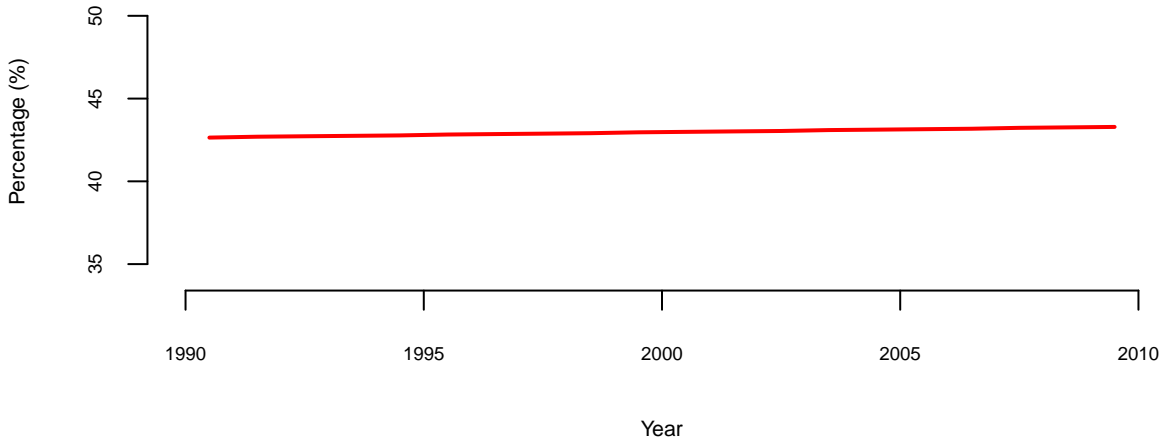

# Somalia

## Data, and estimated NMR

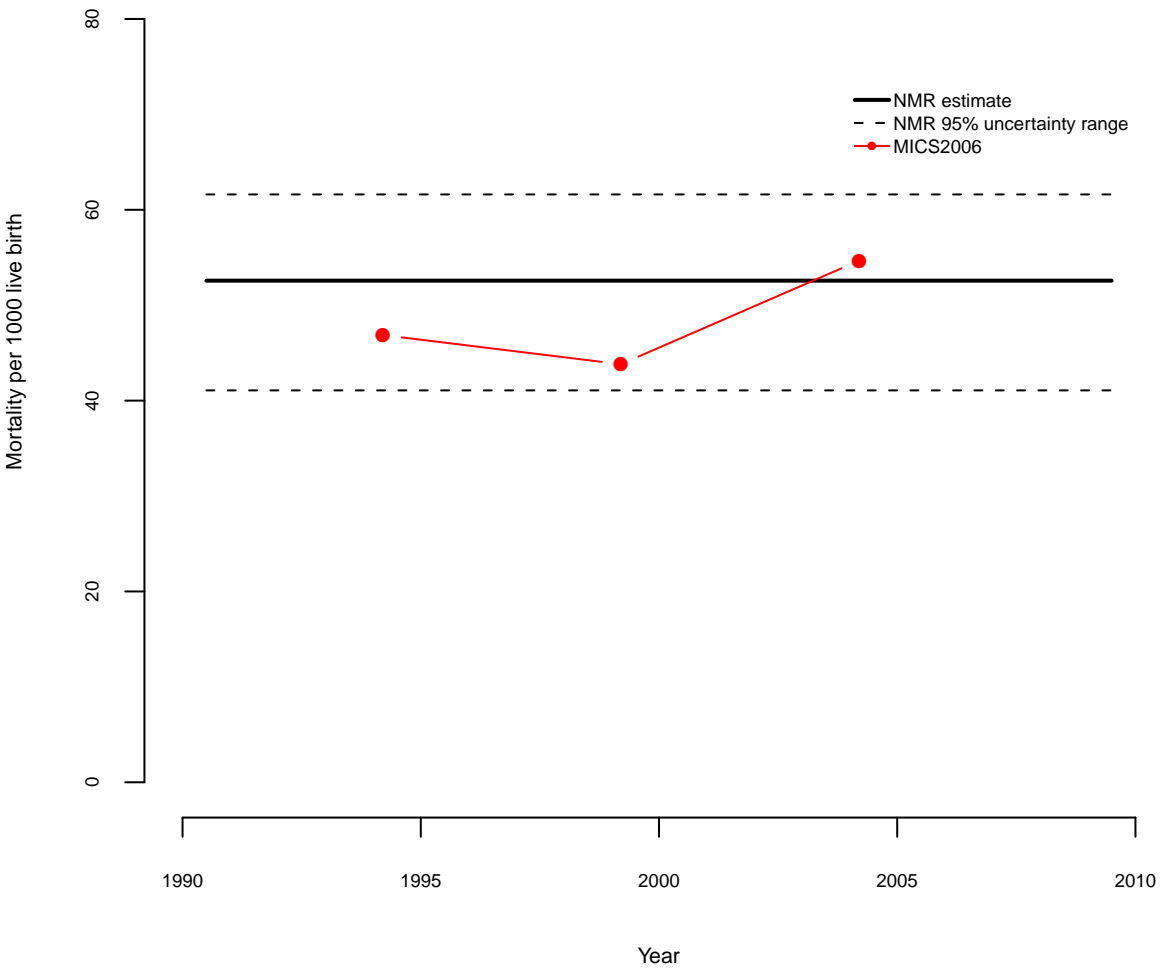

### Somalia NMR and U5MR

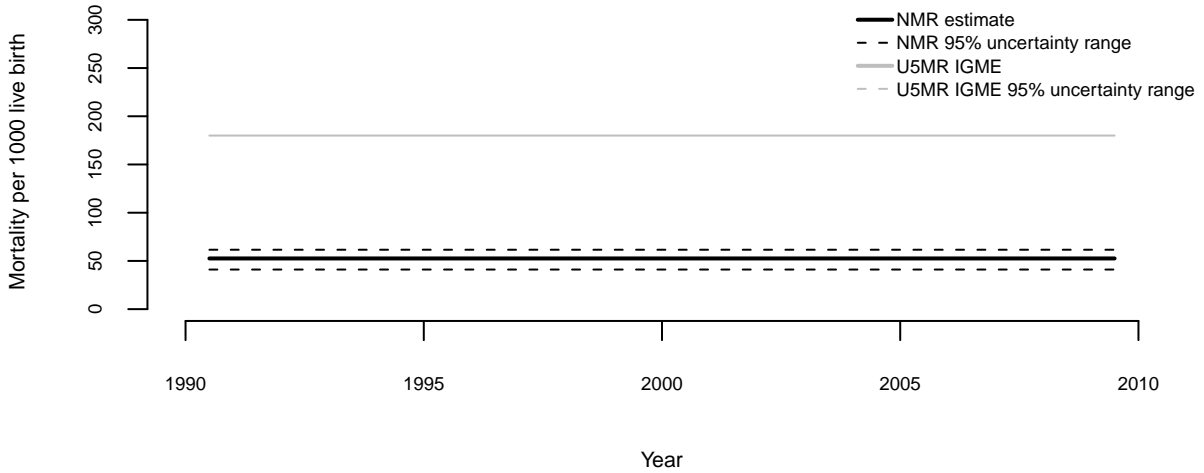

### Somalia NMR as percentage of U5MR

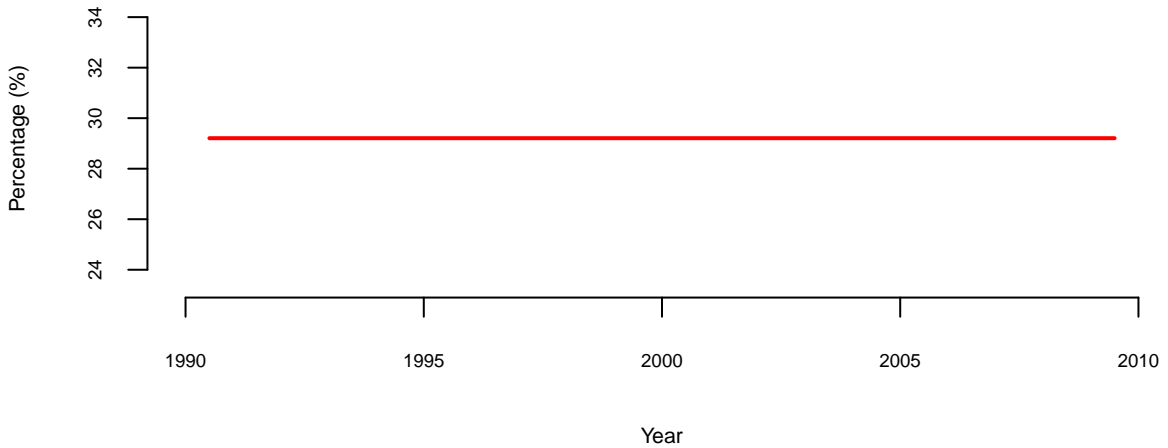

### South Africa Data, and estimated NMR

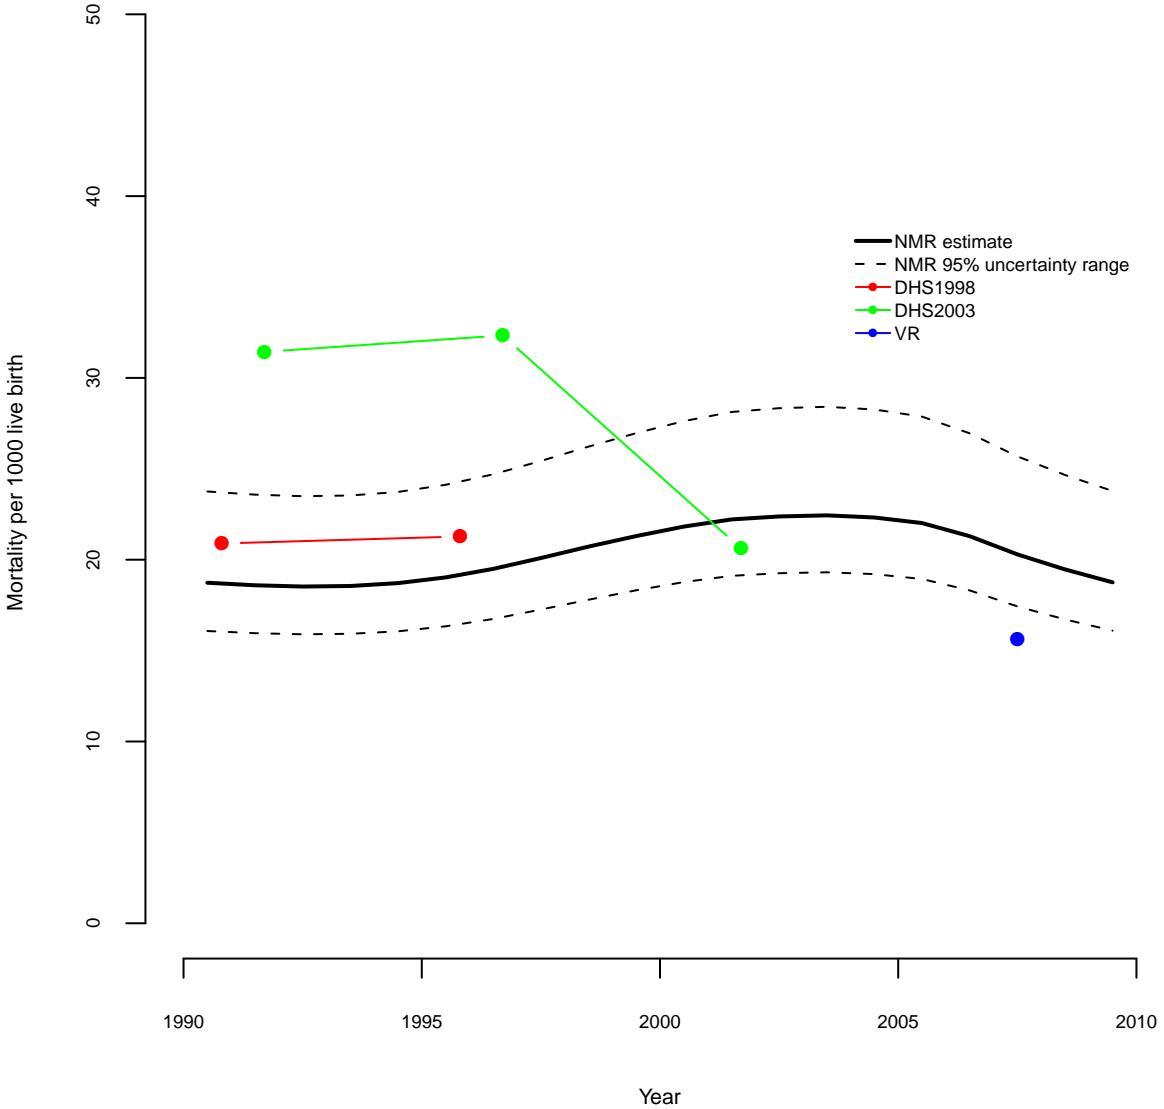

### South Africa NMR and U5MR

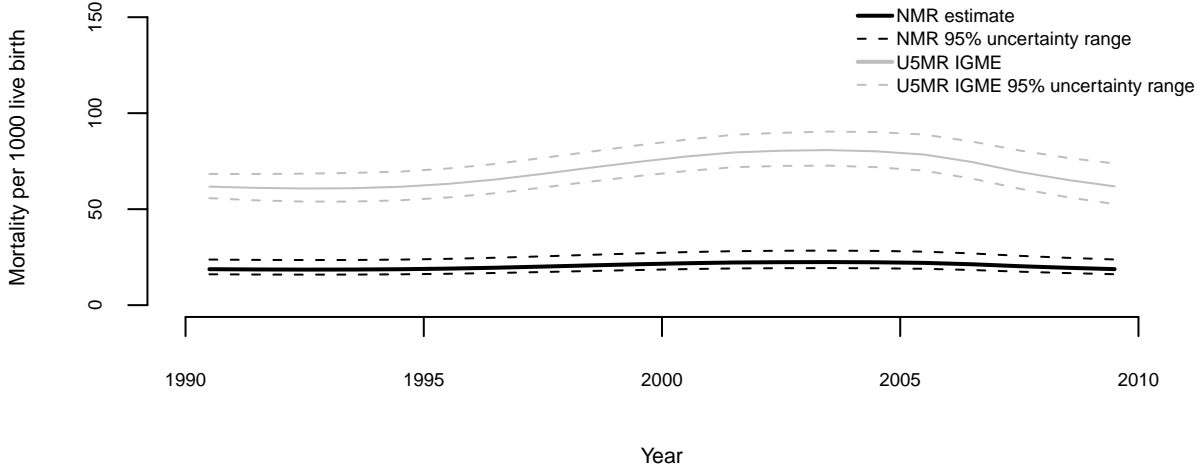

### South Africa NMR as percentage of U5MR

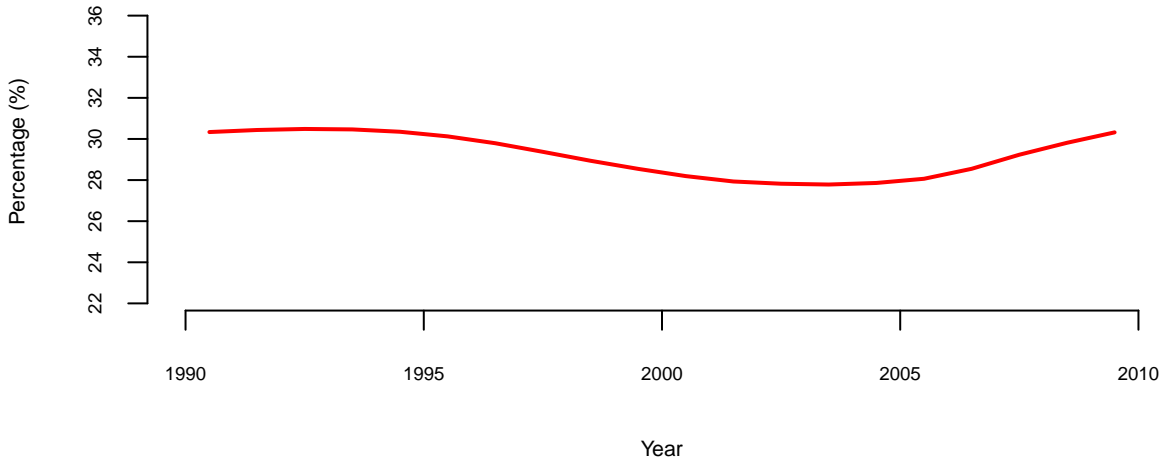



Spain  
Data, and estimated NMR

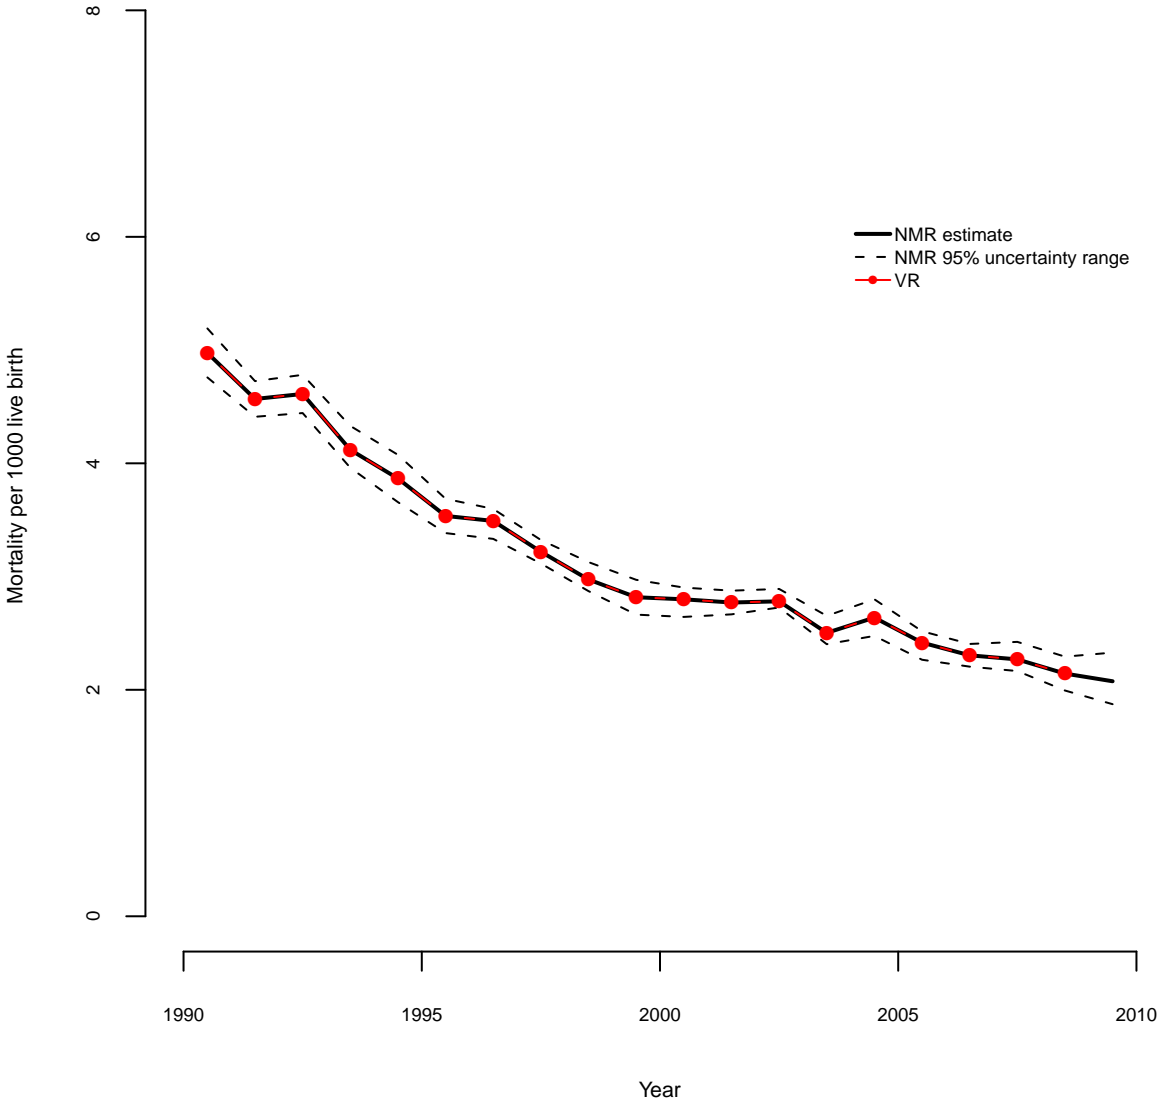

### Spain NMR and U5MR

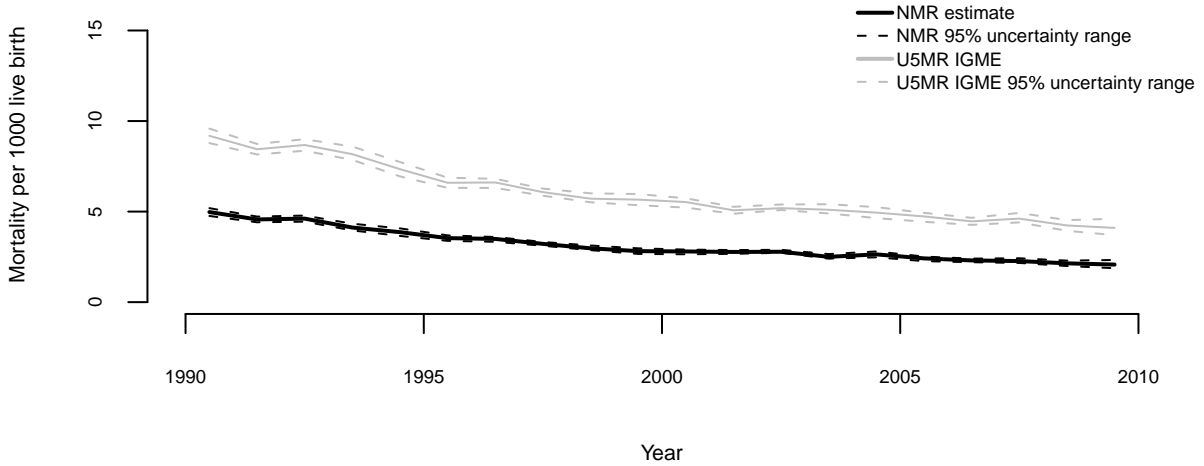

### Spain NMR as percentage of U5MR

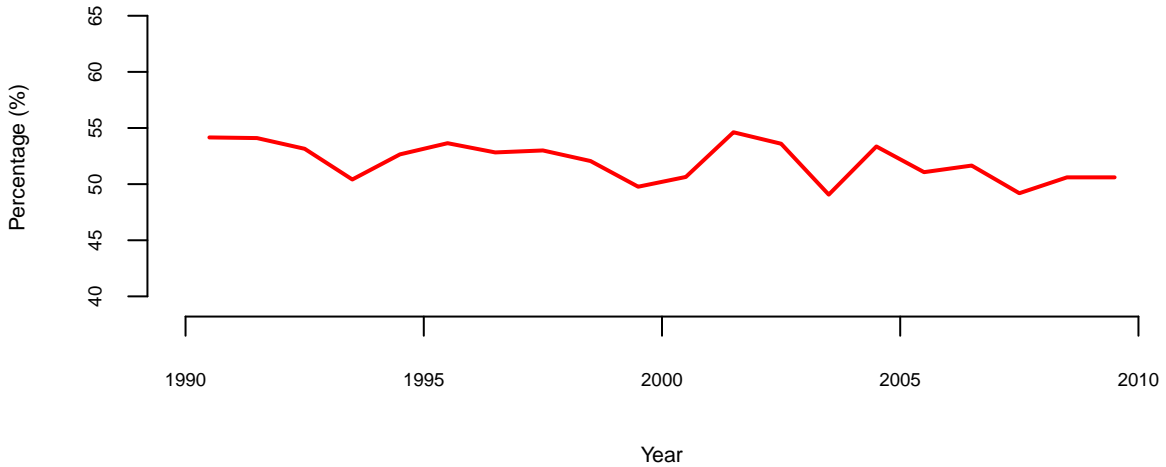

# Sri Lanka

## Data, and estimated NMR

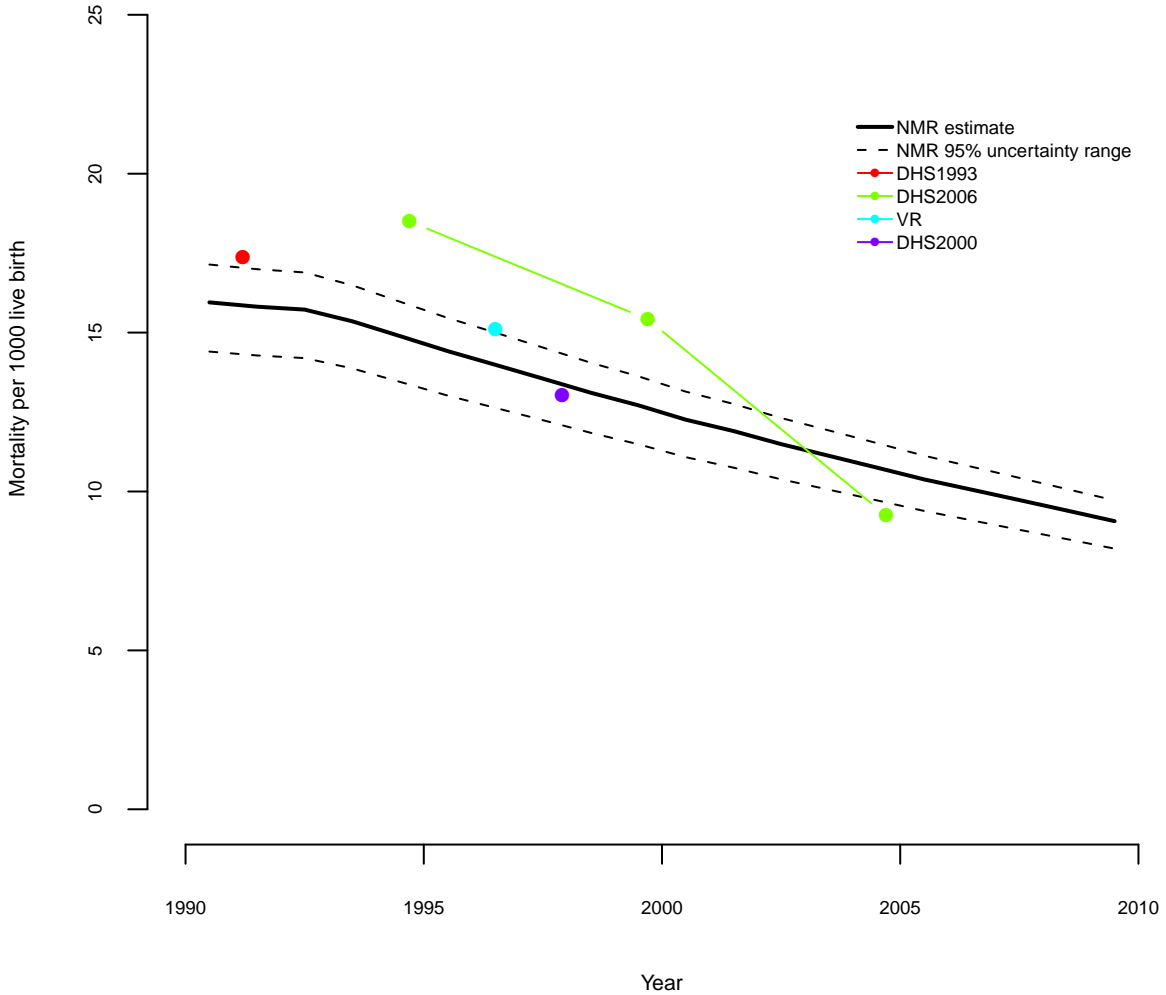

### Sri Lanka NMR and U5MR

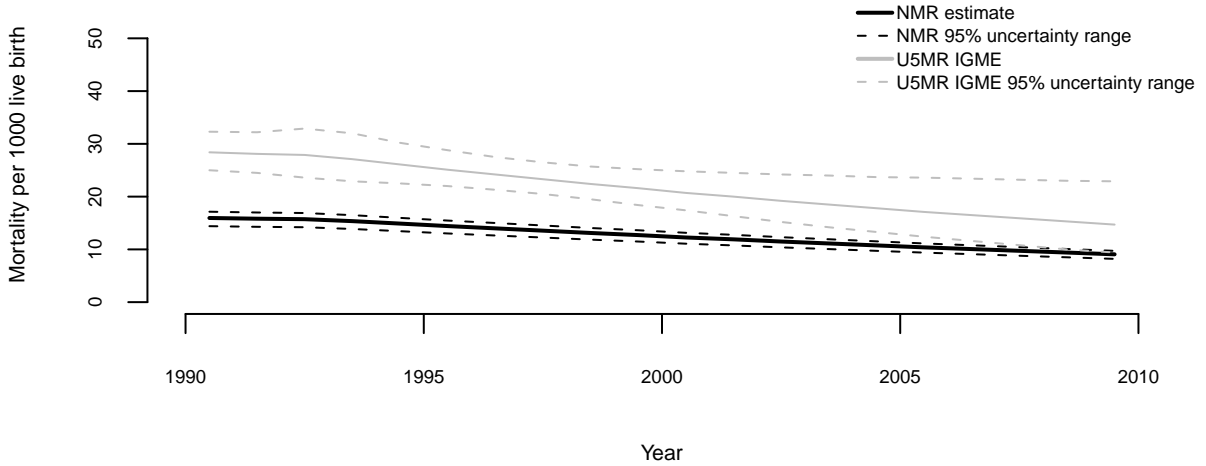

### Sri Lanka NMR as percentage of U5MR

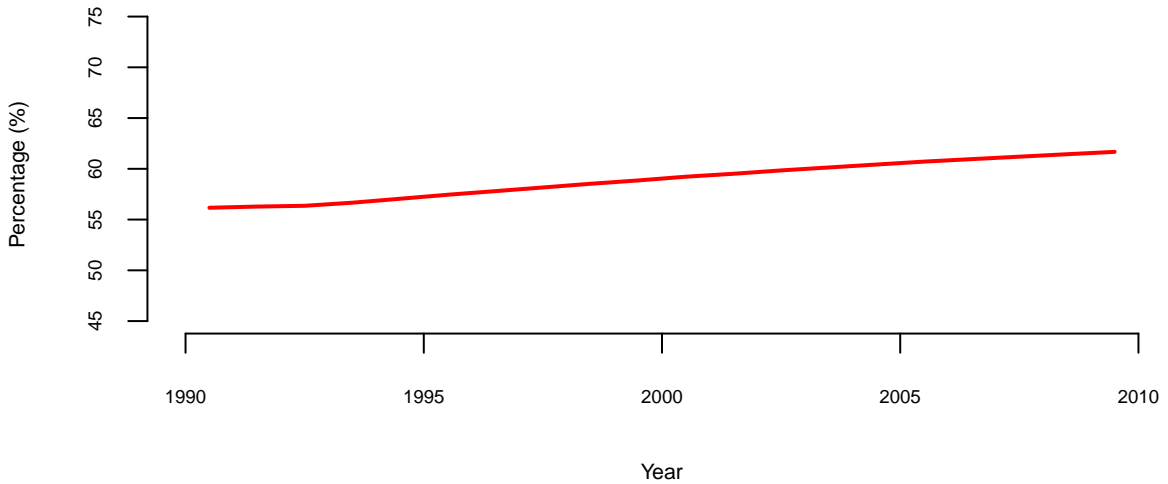

**Sudan**  
**Data, and estimated NMR**

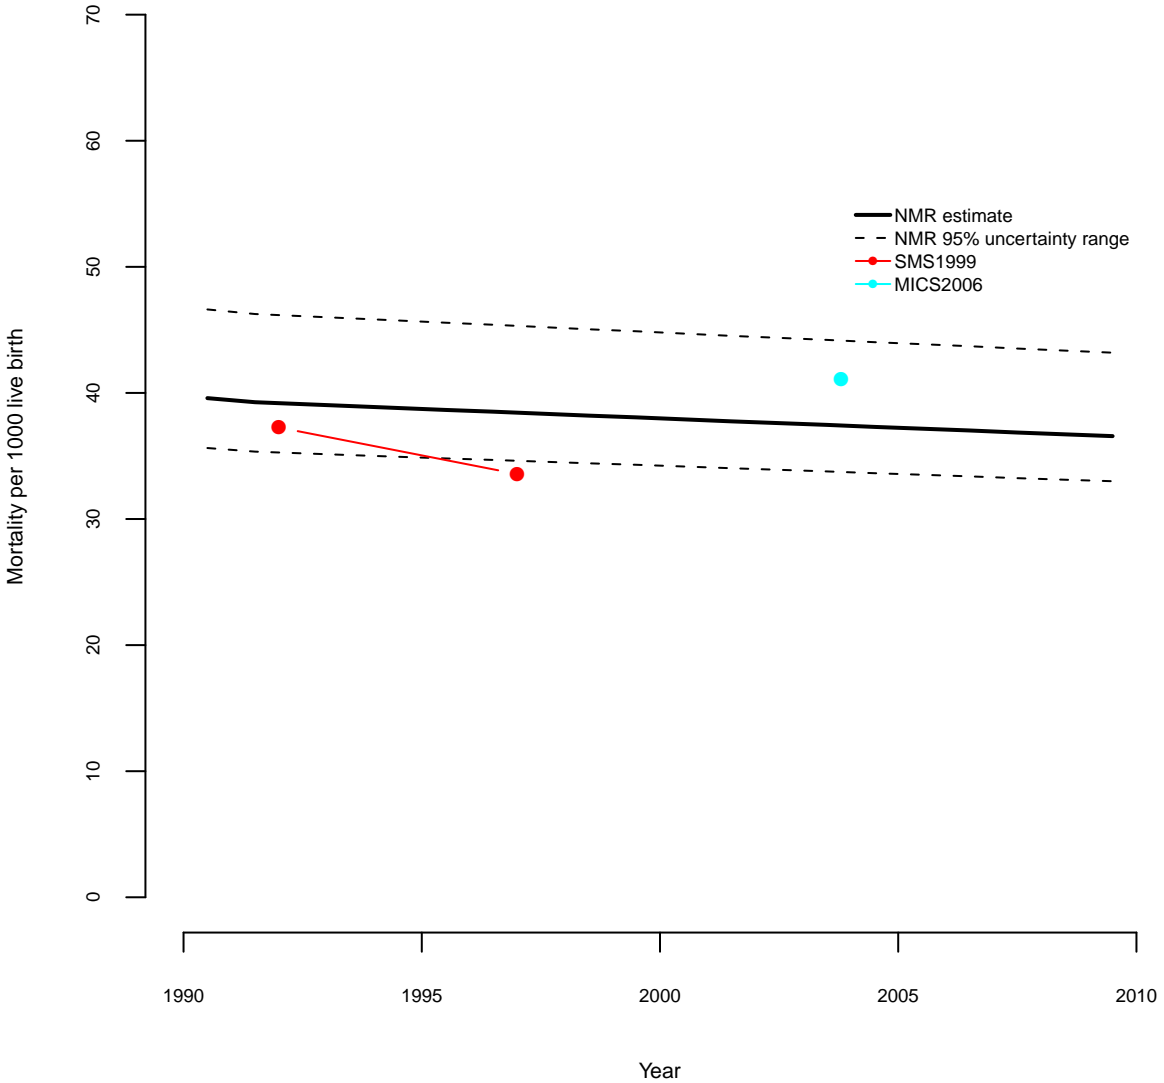

### Sudan NMR and U5MR

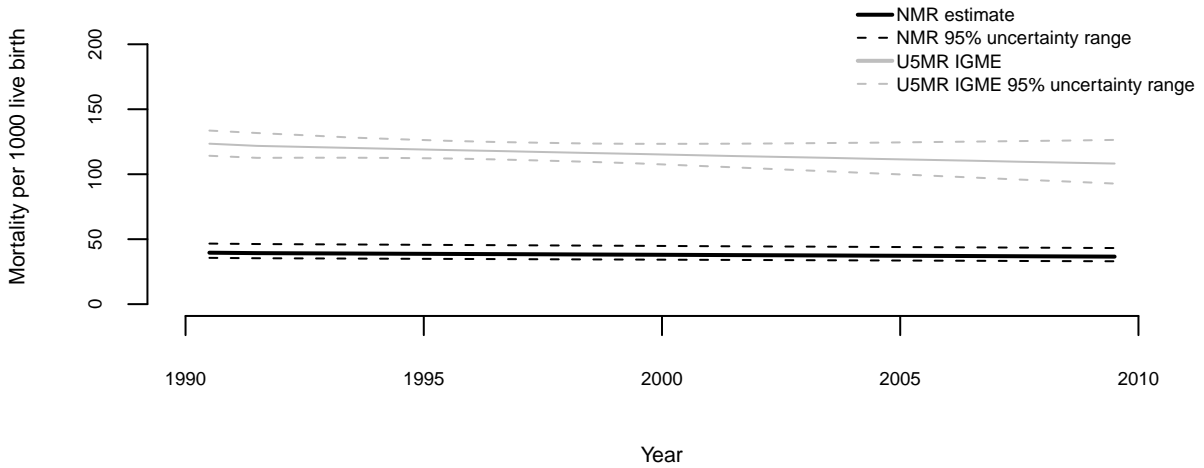

### Sudan NMR as percentage of U5MR

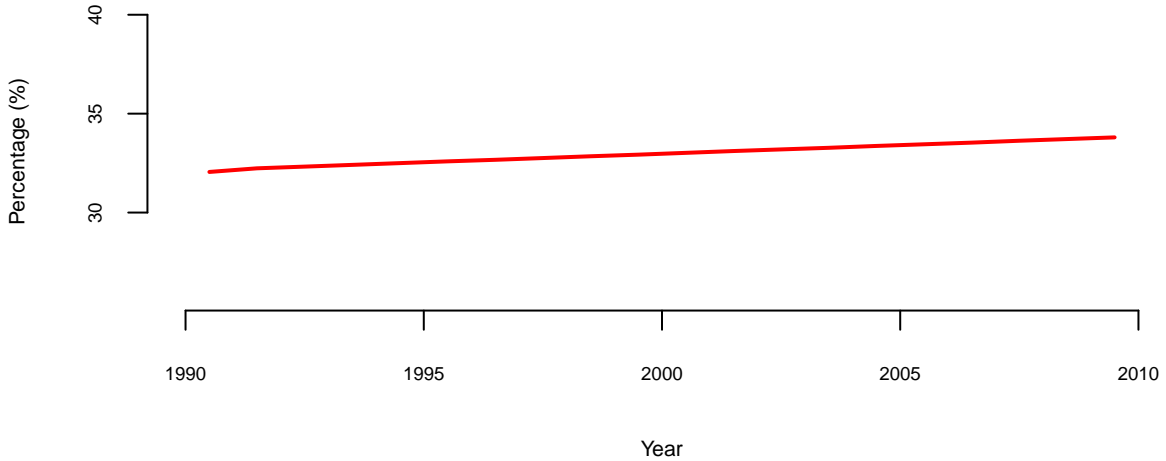

Suriname  
Data, and estimated NMR

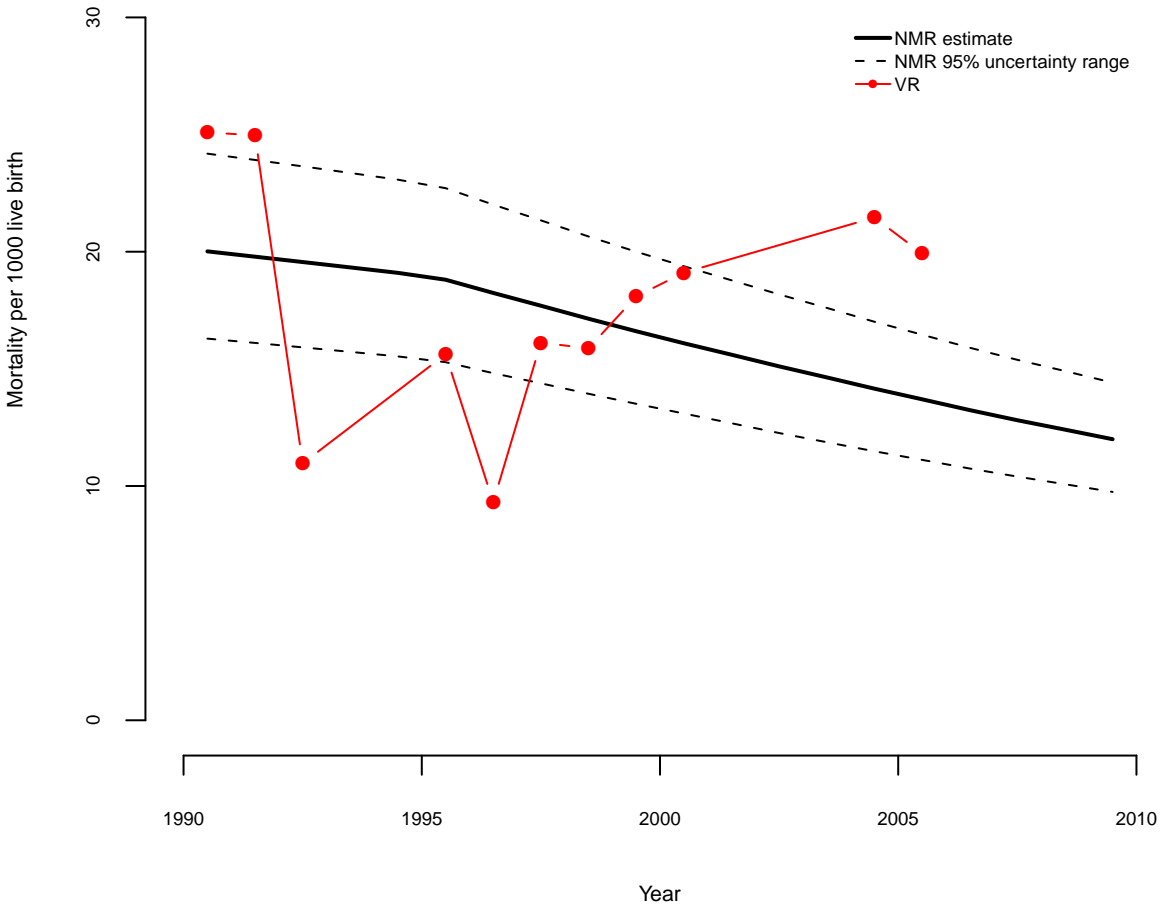

### Suriname NMR and U5MR

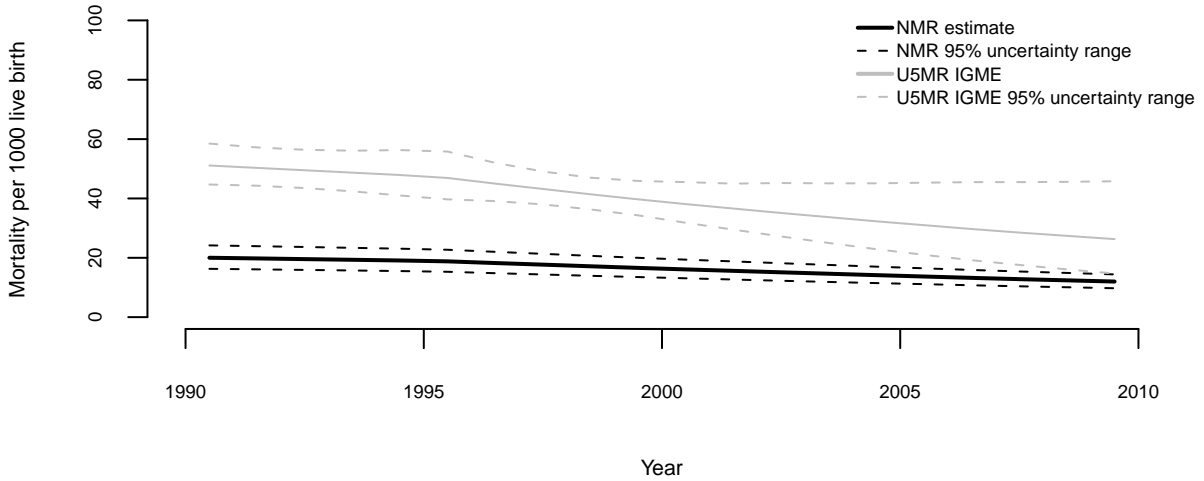

### Suriname NMR as percentage of U5MR

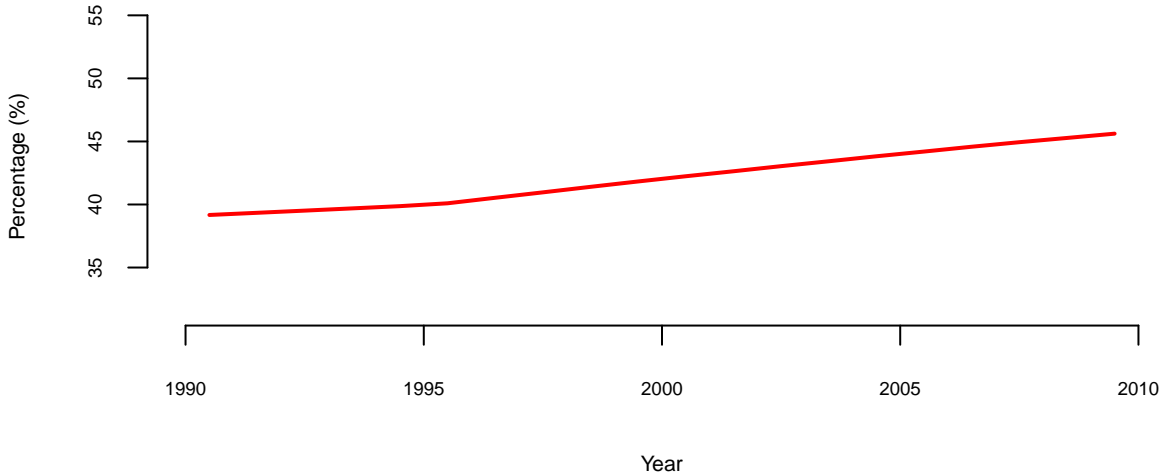



### Swaziland Data, and estimated NMR

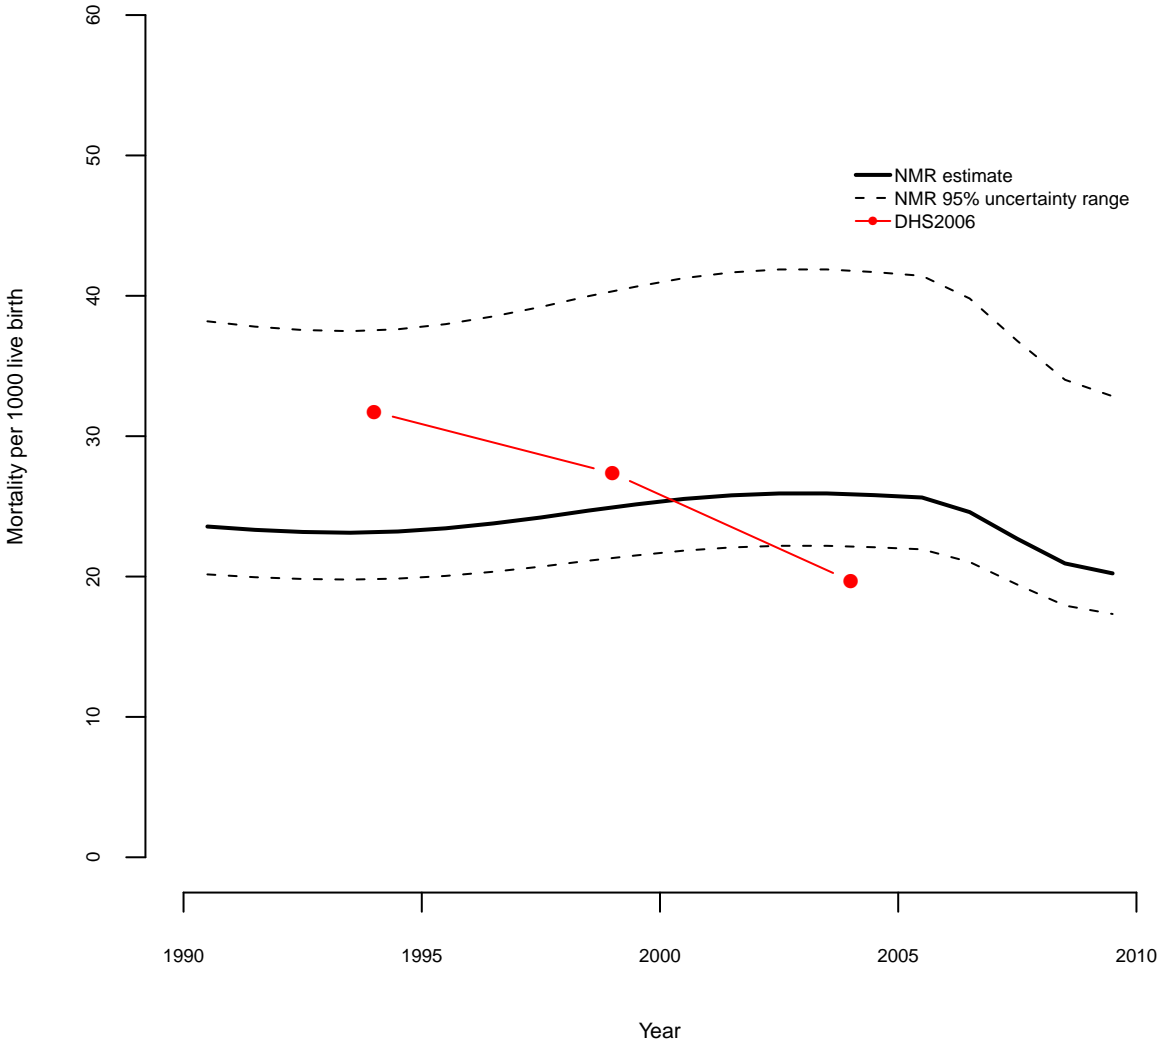

### Swaziland NMR and U5MR

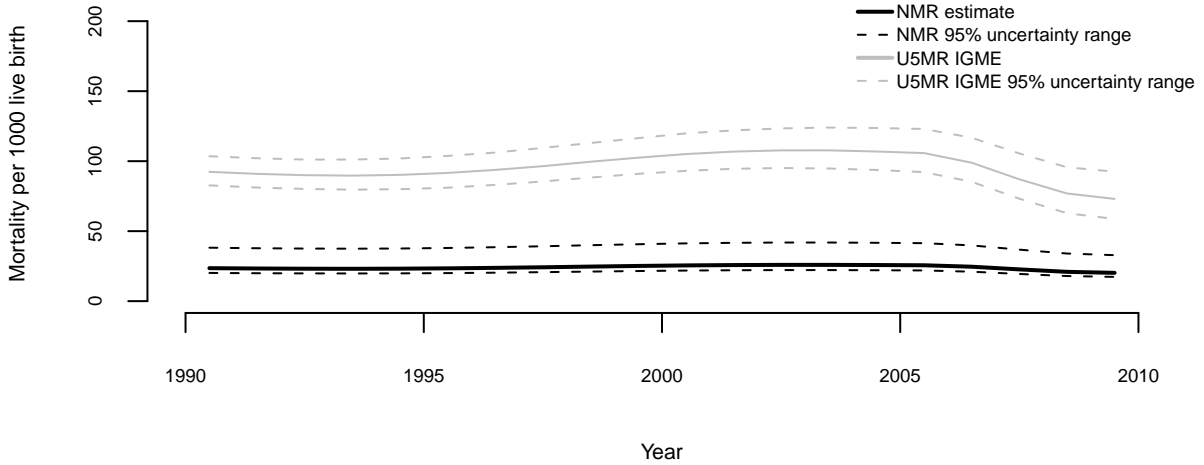

### Swaziland NMR as percentage of U5MR

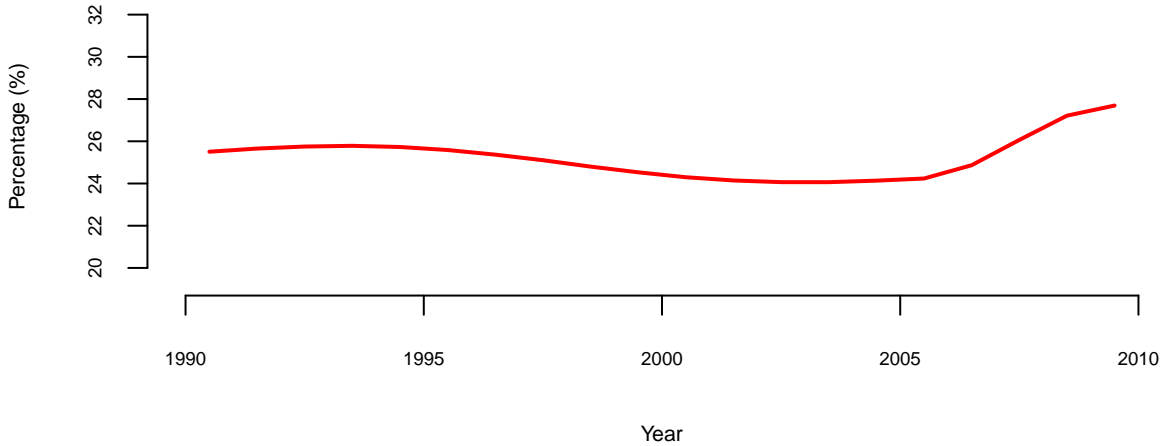

### Sweden Data, and estimated NMR

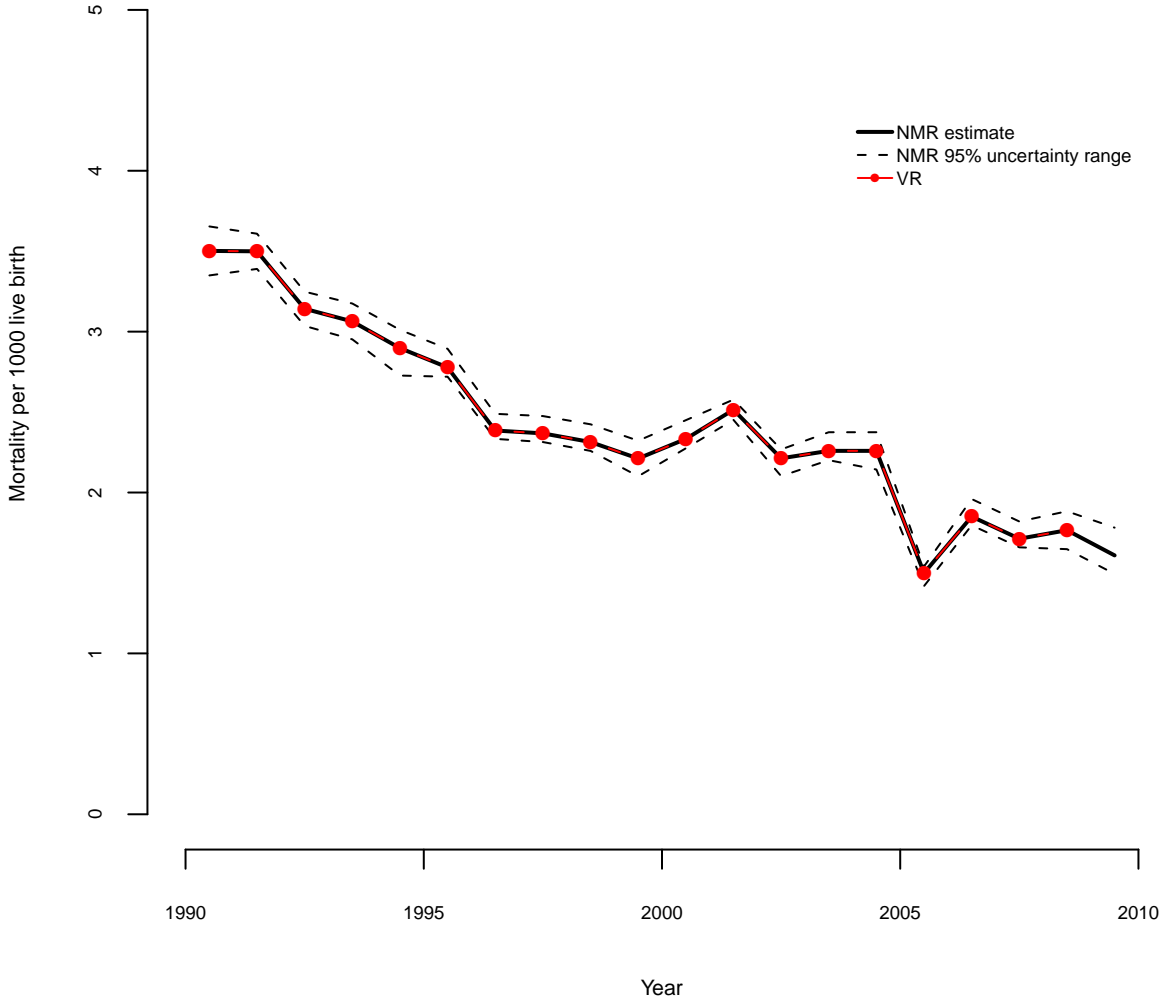

### Sweden NMR and U5MR

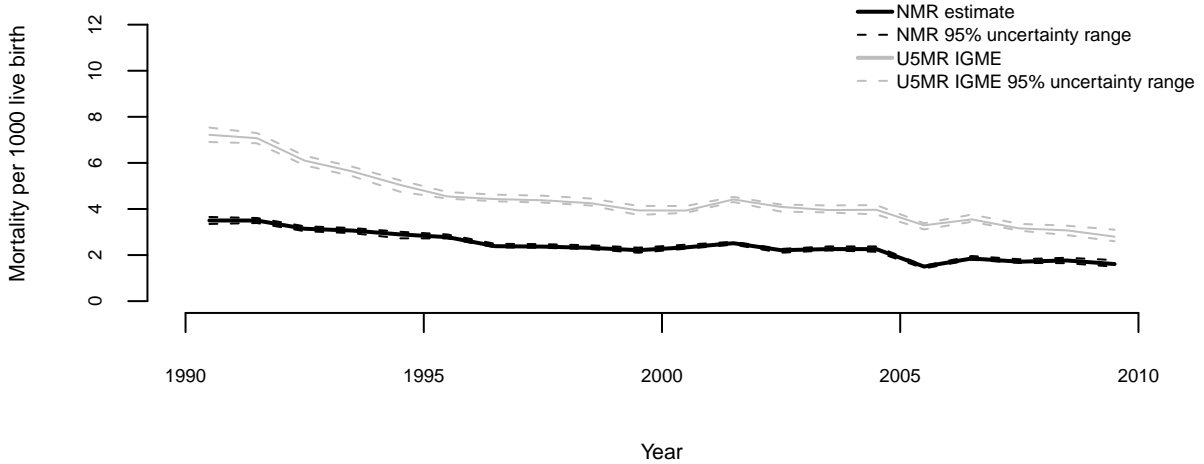

### Sweden NMR as percentage of U5MR

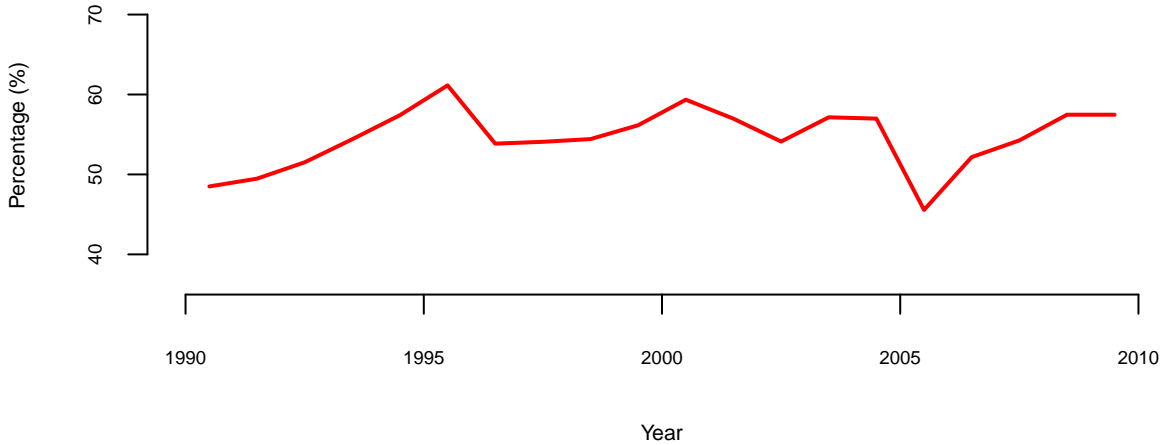

Switzerland  
Data, and estimated NMR

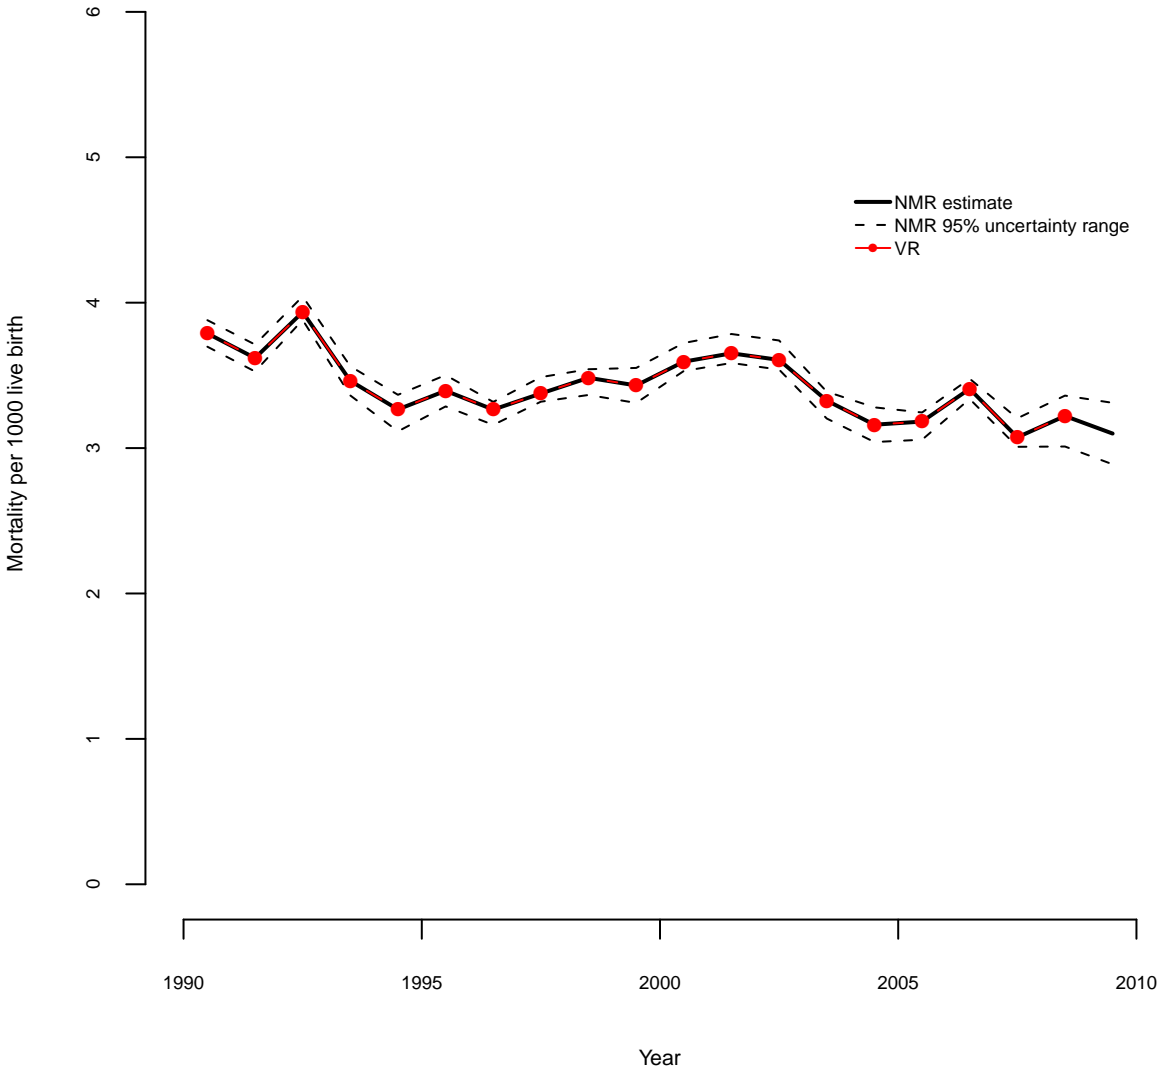

### Switzerland NMR and U5MR

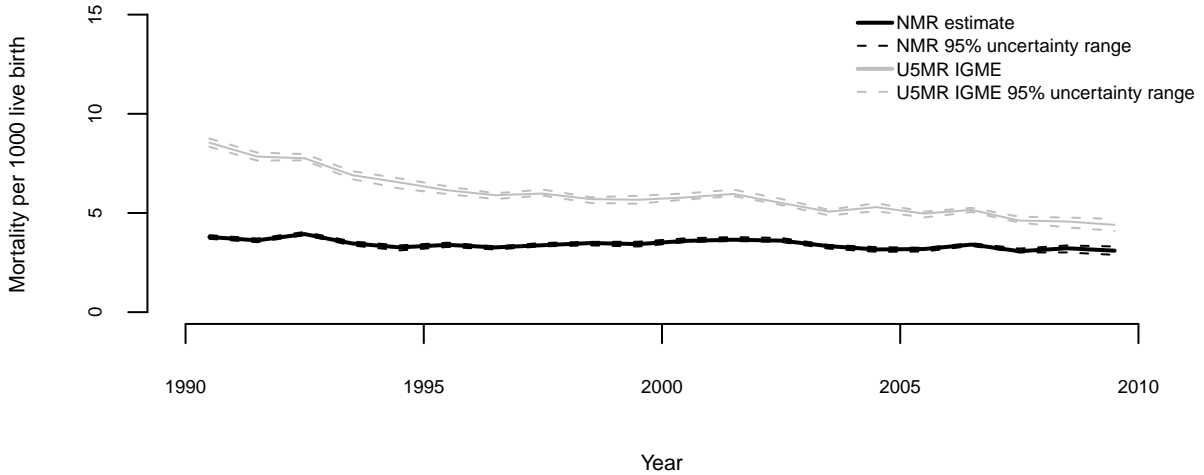

### Switzerland NMR as percentage of U5MR

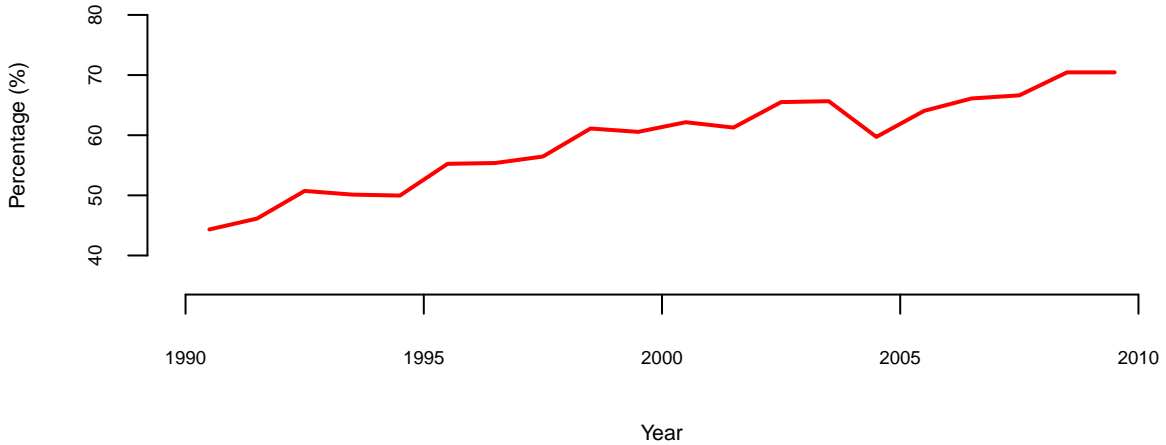

### Syrian Arab Republic Data, and estimated NMR

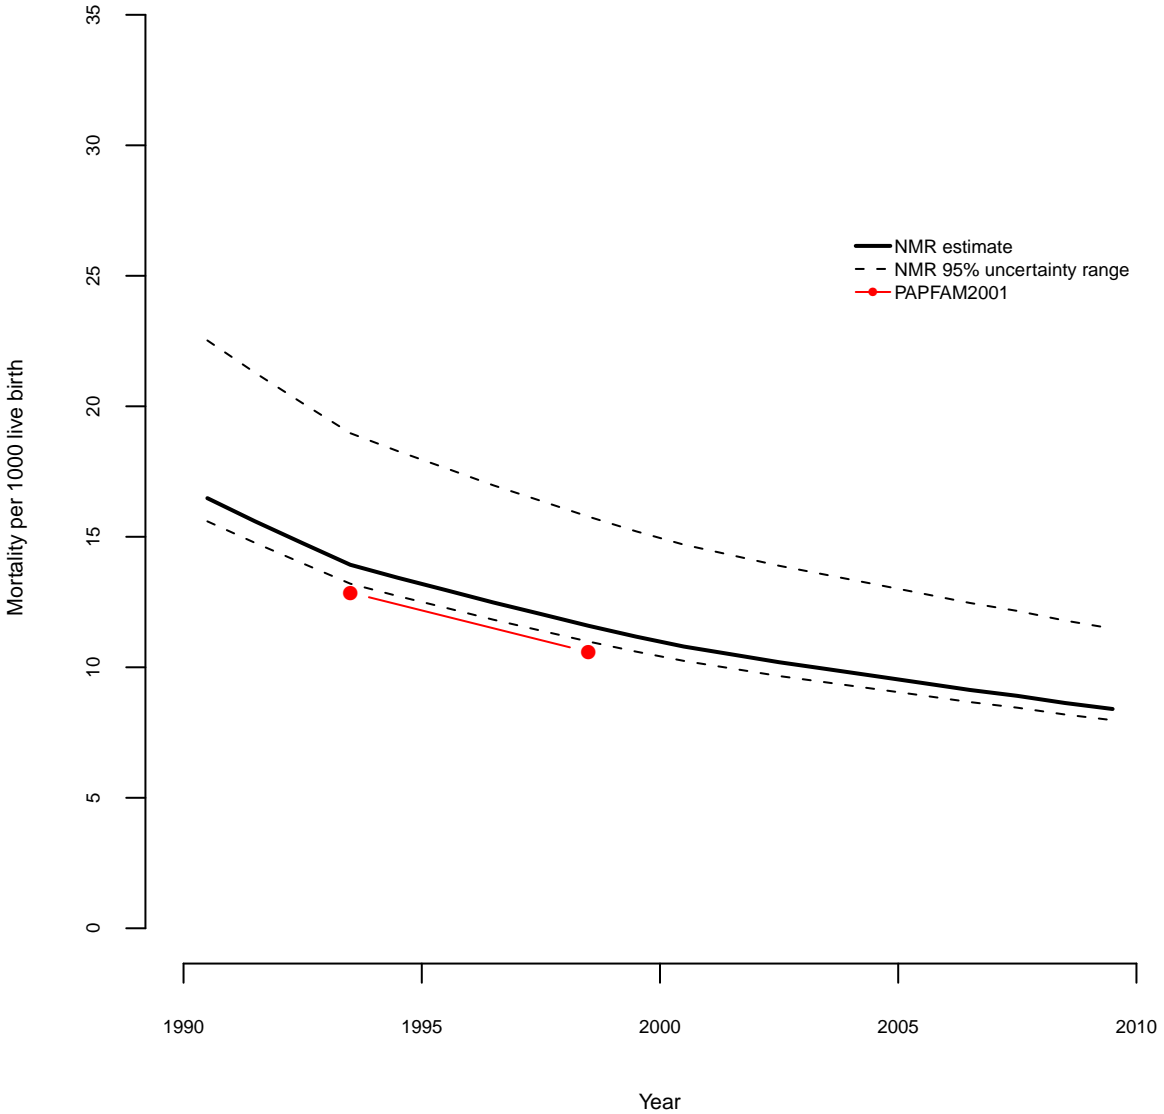

### Syrian Arab Republic NMR and U5MR

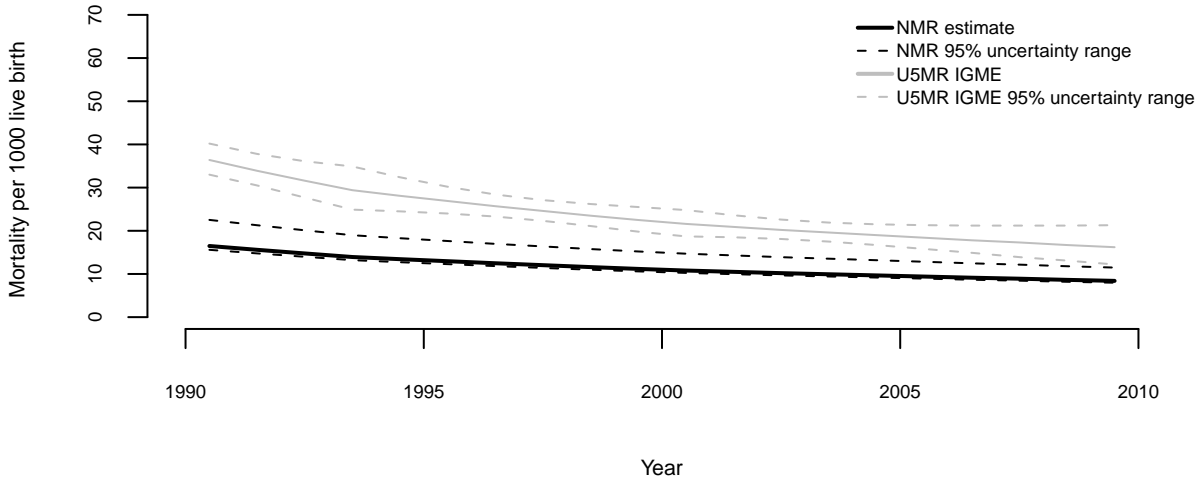

### Syrian Arab Republic NMR as percentage of U5MR

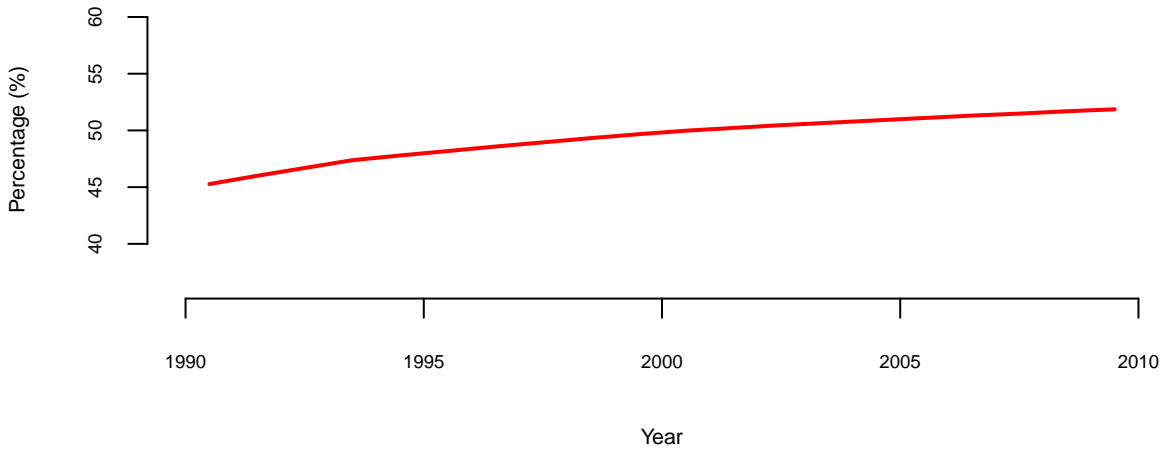



Tajikistan  
Data, and estimated NMR

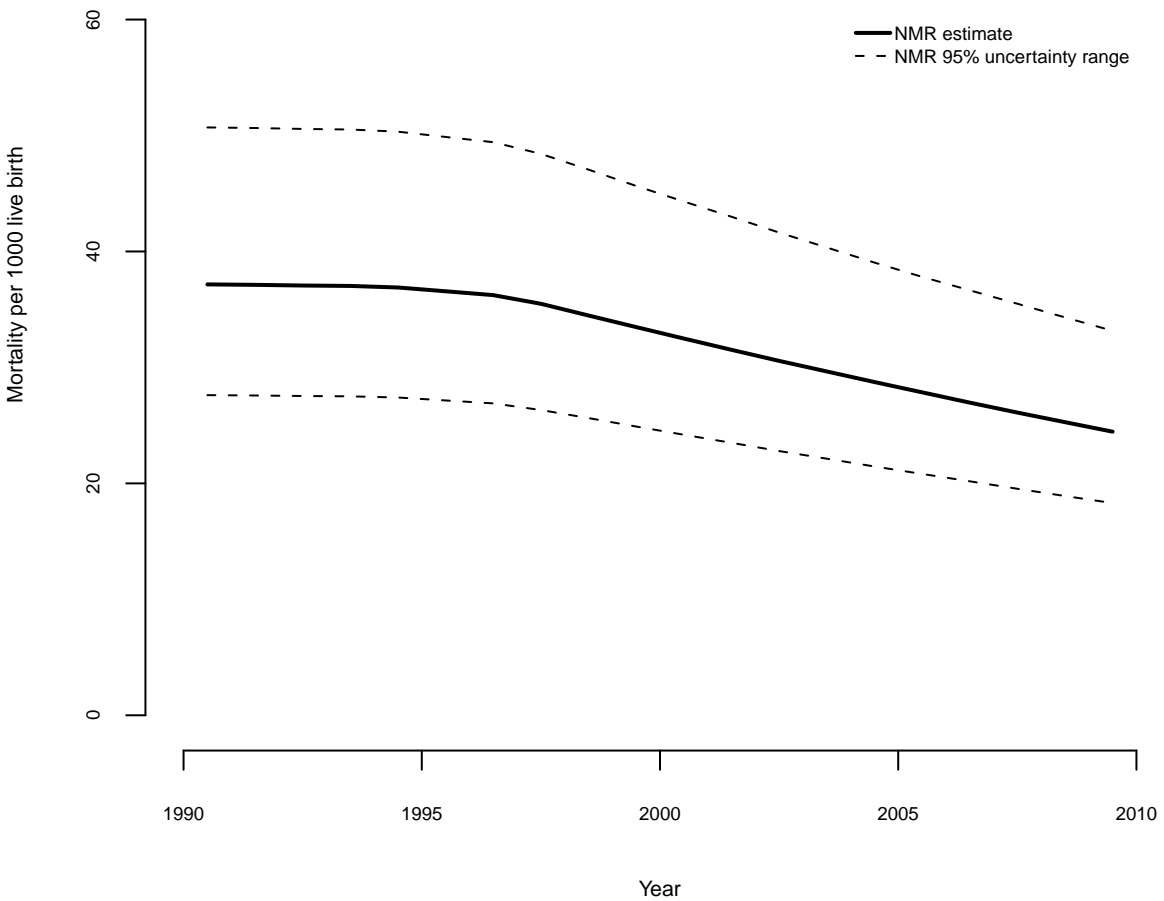

### Tajikistan NMR and U5MR

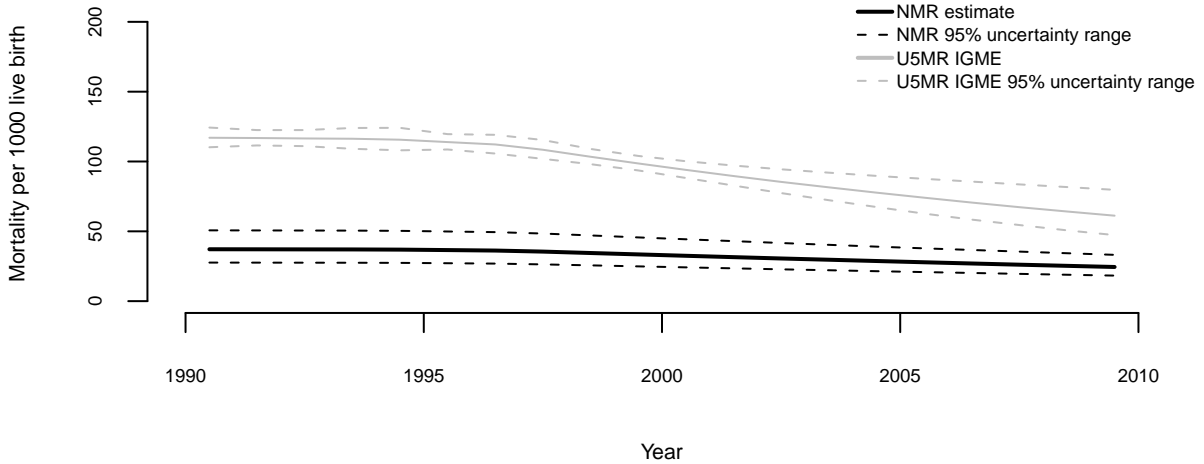

### Tajikistan NMR as percentage of U5MR

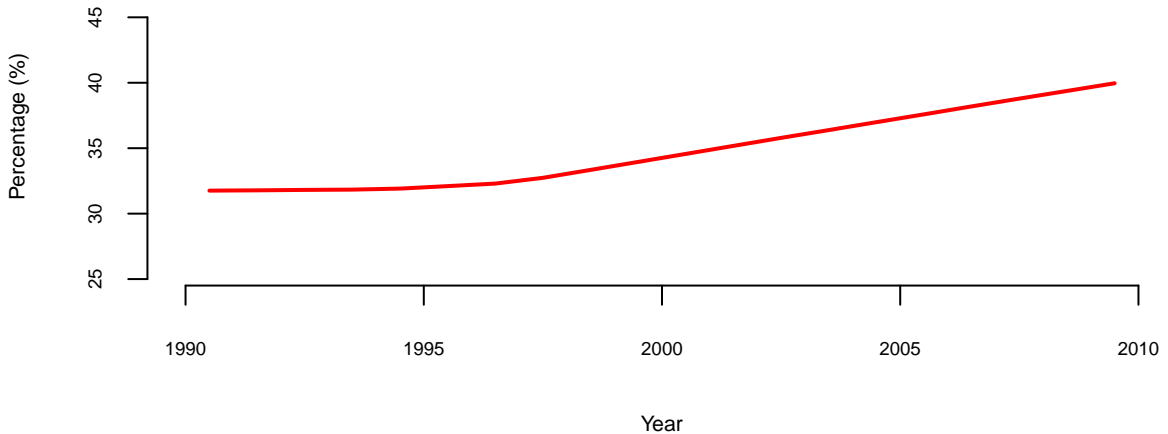

Thailand  
Data, and estimated NMR

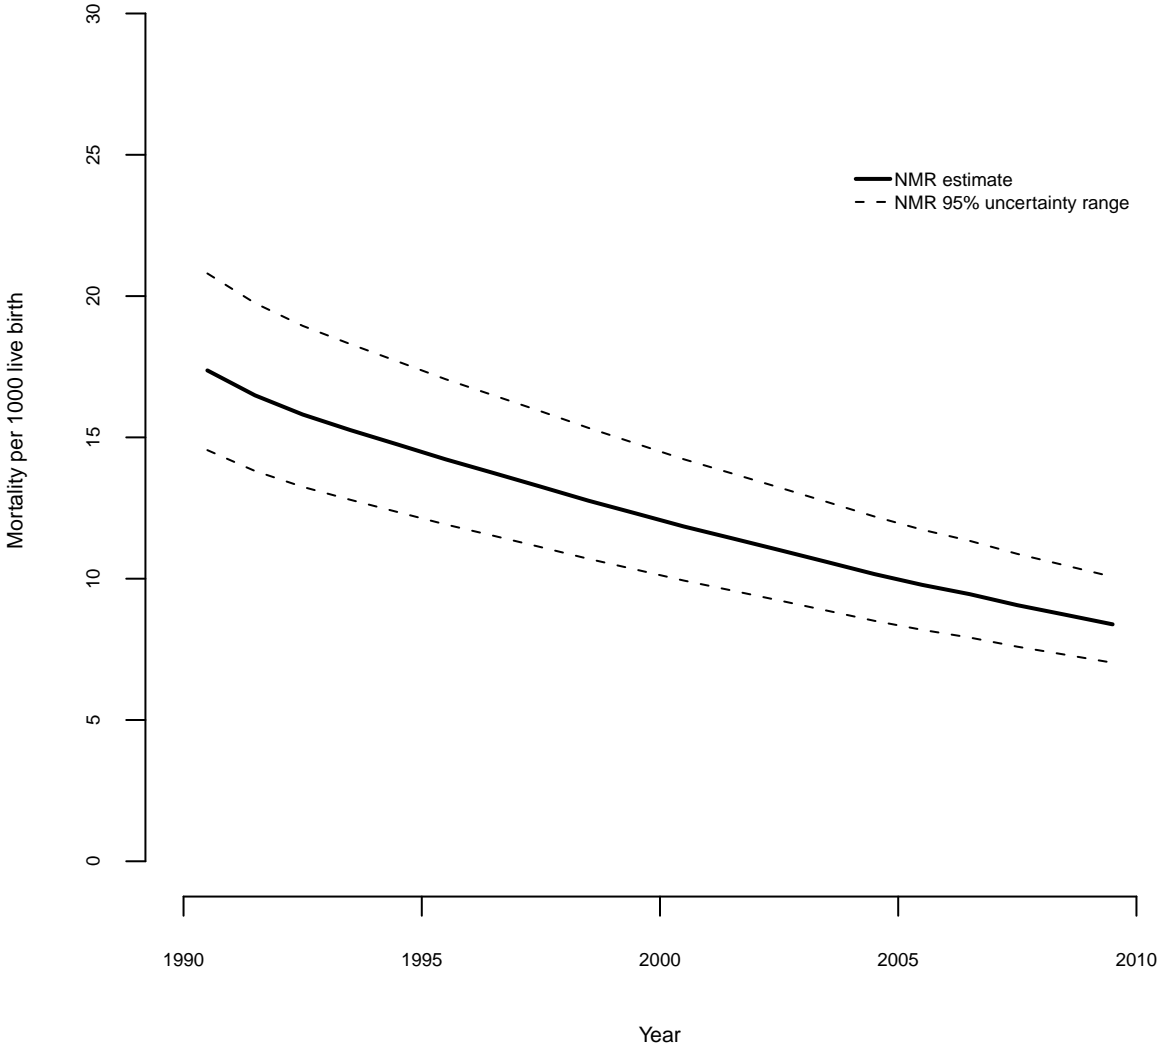

### Thailand NMR and U5MR

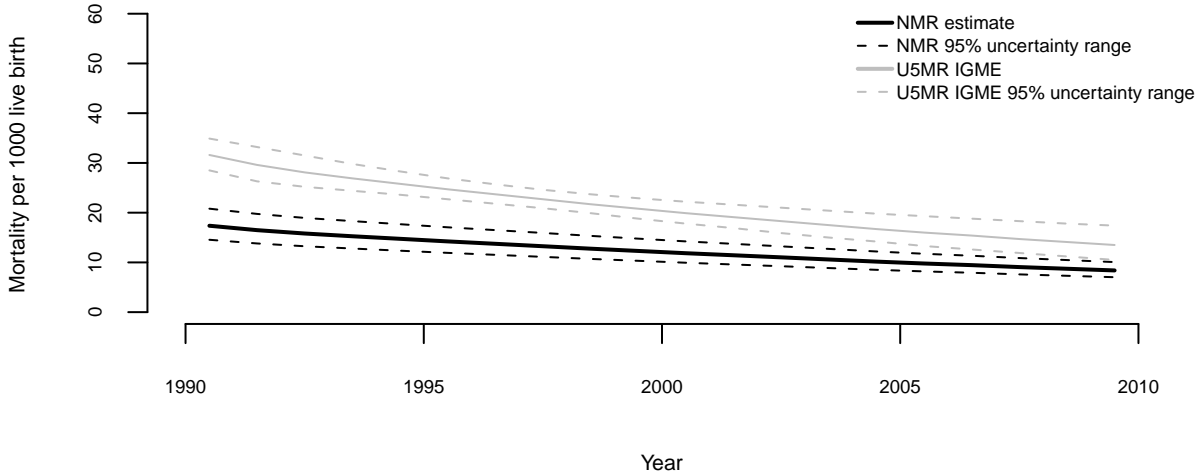

### Thailand NMR as percentage of U5MR

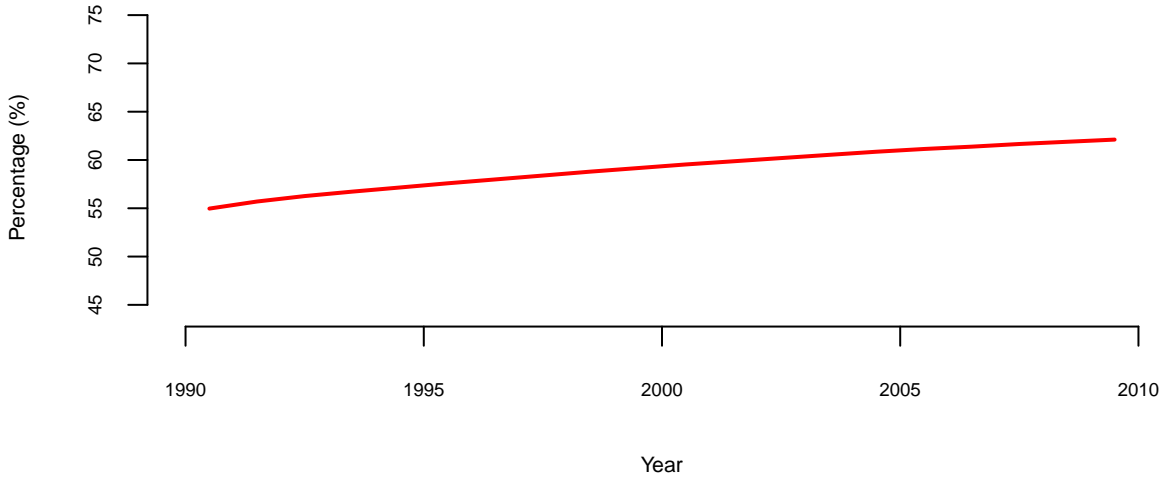

### The former Yugoslav Republic of Macedonia Data, and estimated NMR

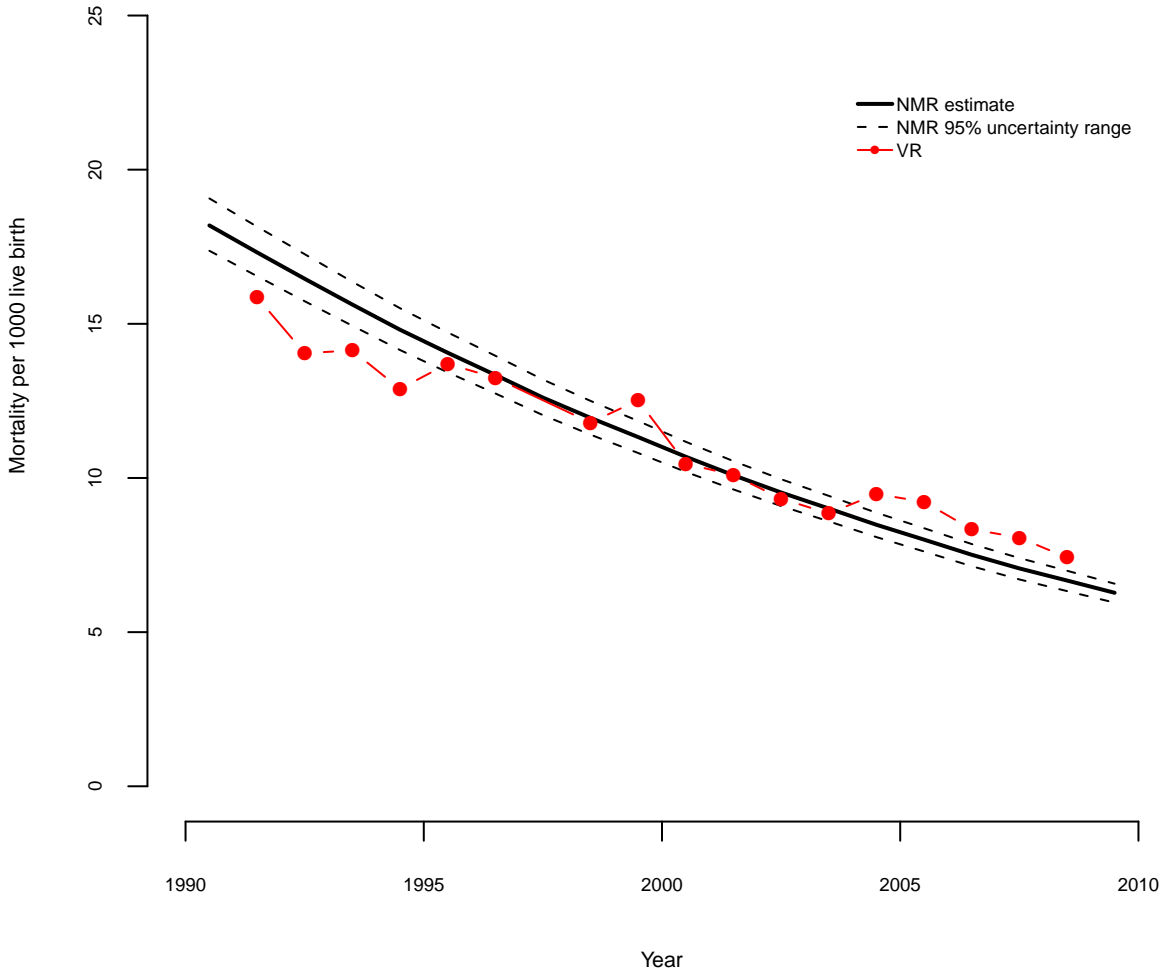

### The former Yugoslav Republic of Macedonia NMR and U5MR

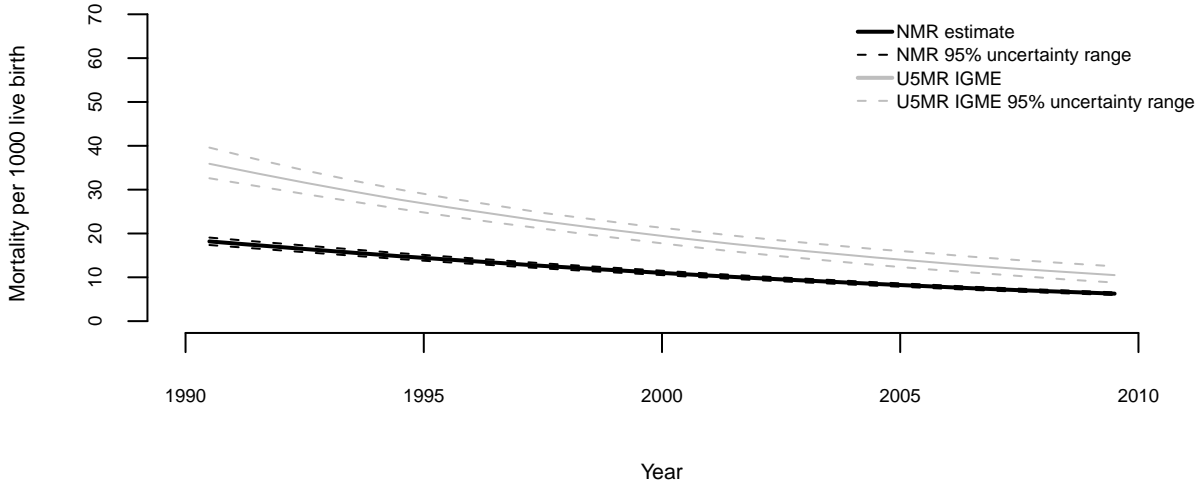

### The former Yugoslav Republic of Macedonia NMR as percentage of U5MR

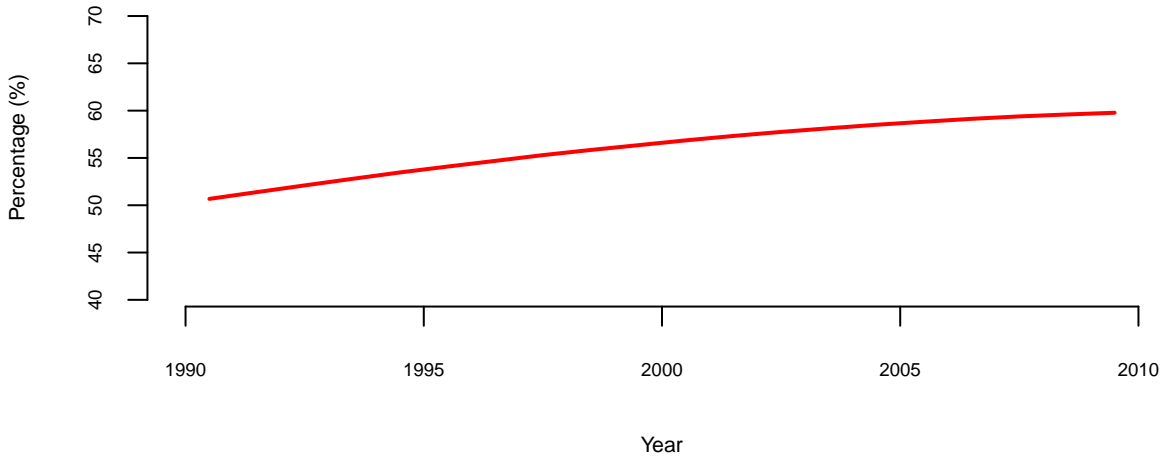

### Timor-Leste Data, and estimated NMR

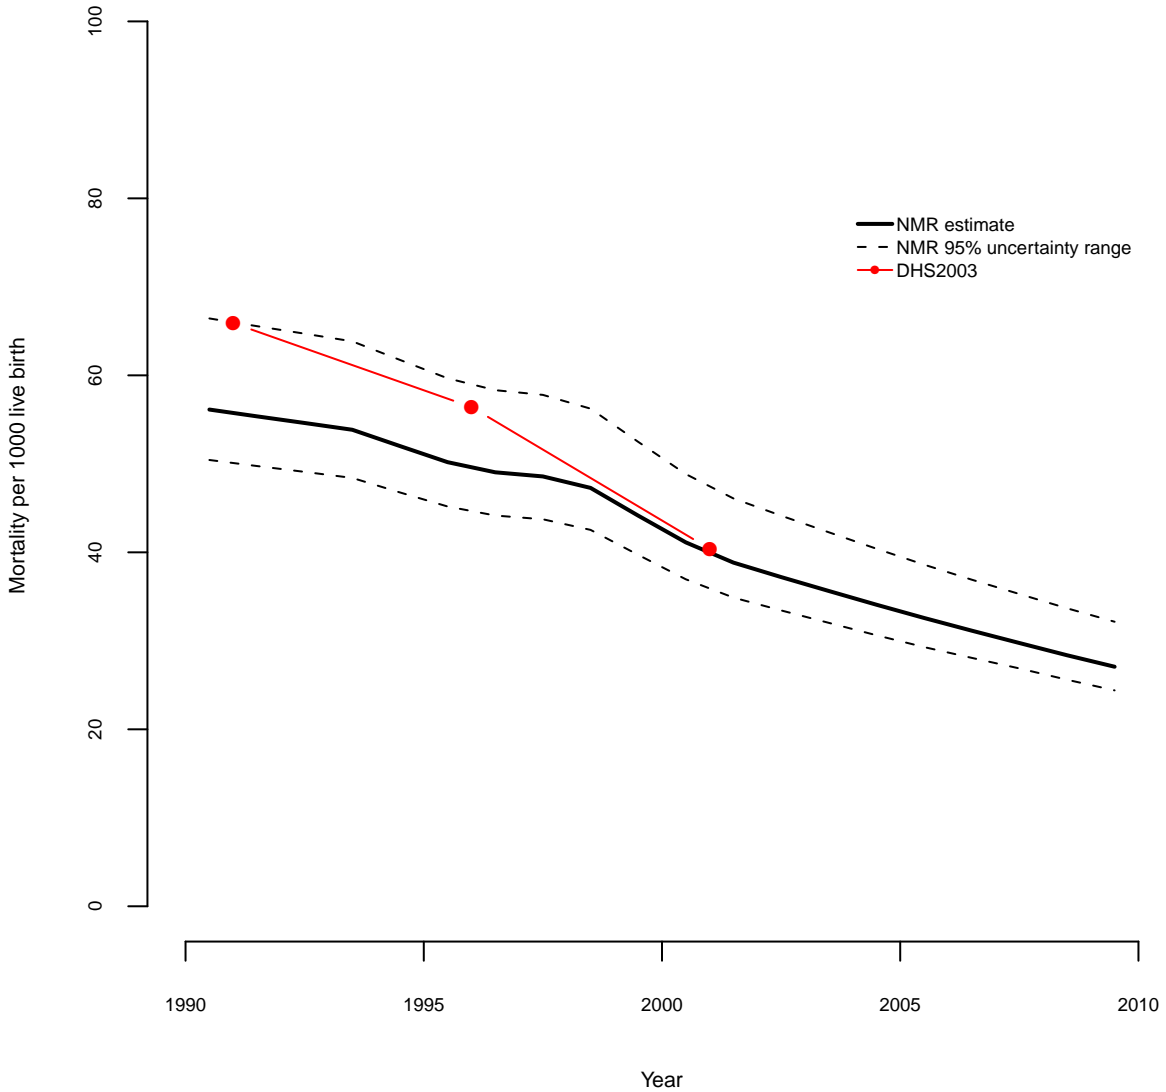

### Timor-Leste NMR and U5MR

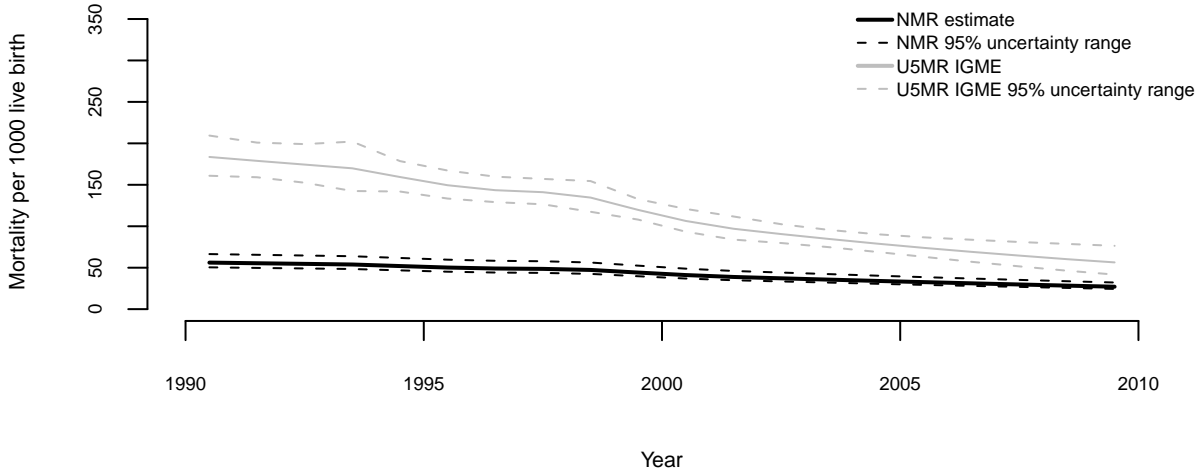

### Timor-Leste NMR as percentage of U5MR

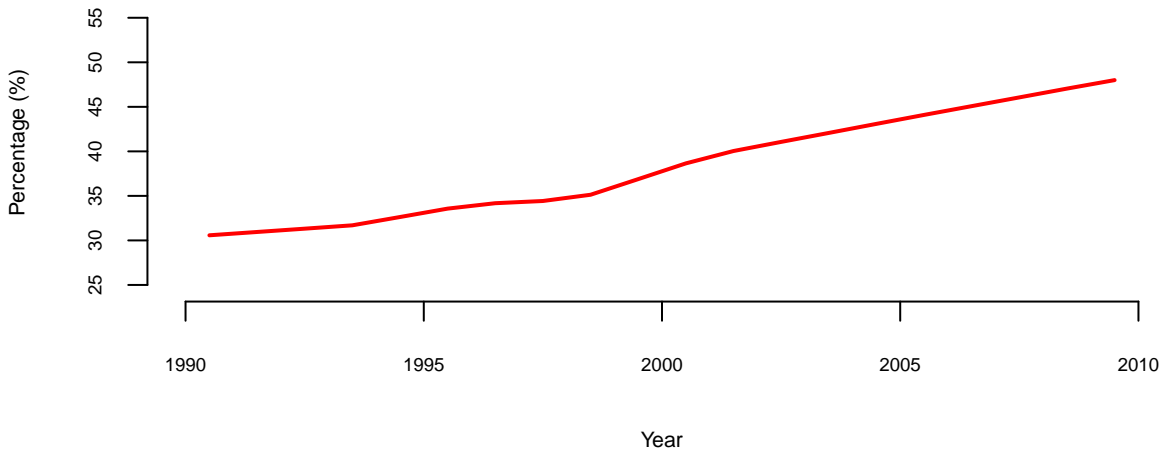



**Togo**  
**Data, and estimated NMR**

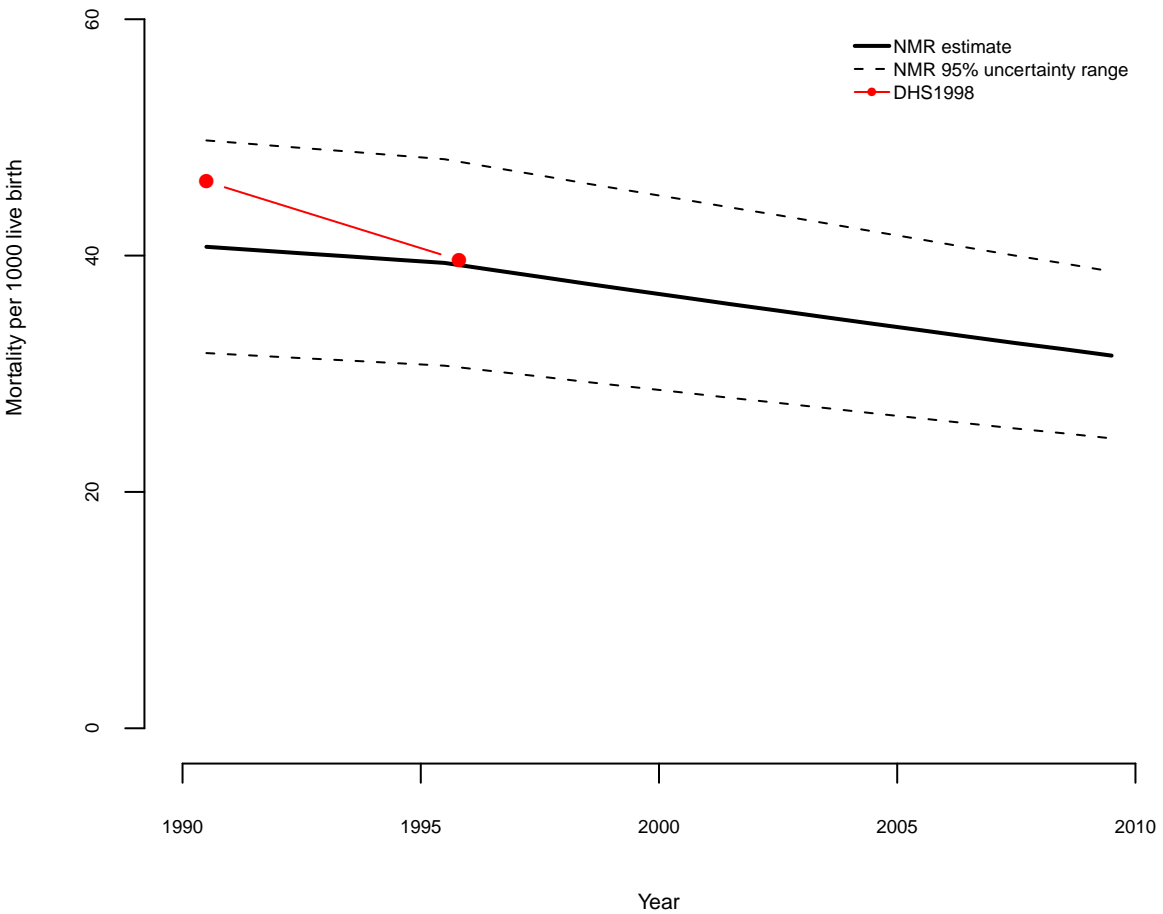

### Togo NMR and U5MR

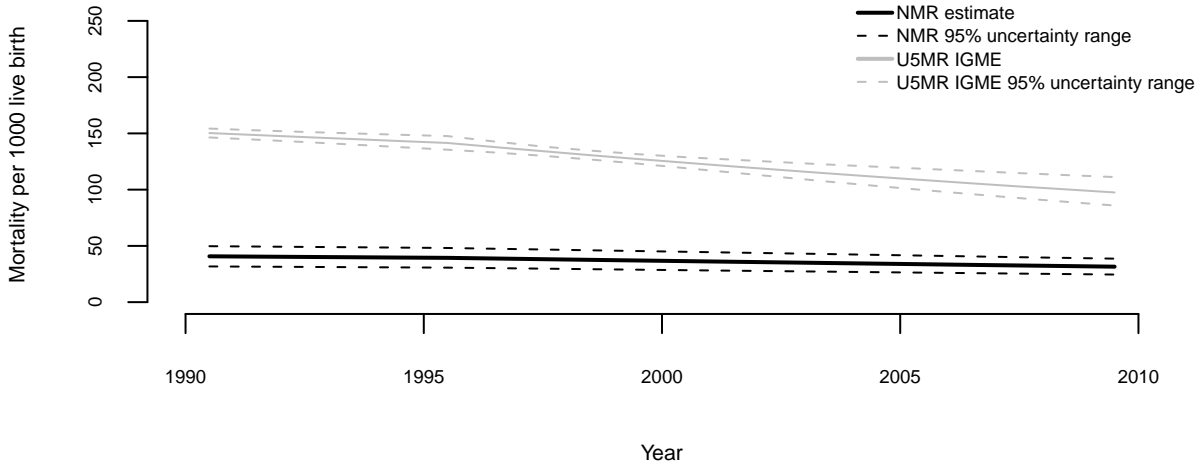

### Togo NMR as percentage of U5MR

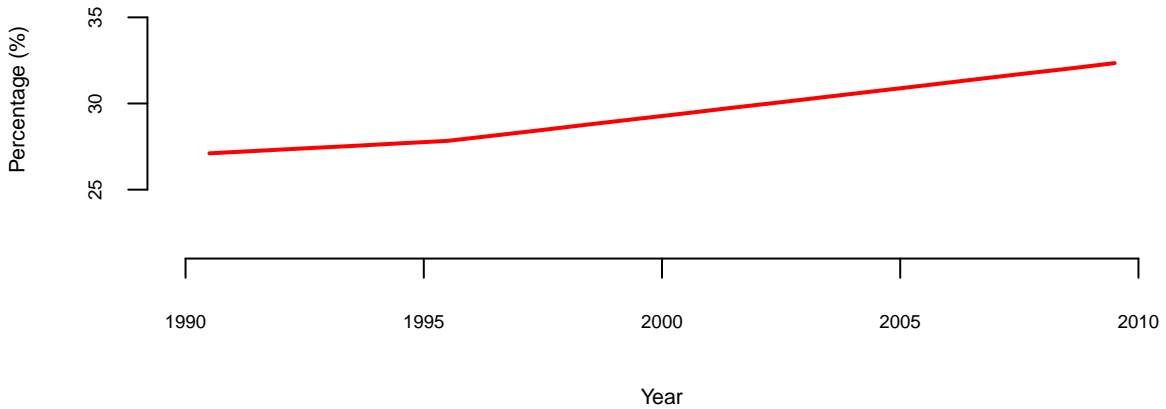

**Tonga**  
**Data, and estimated NMR**

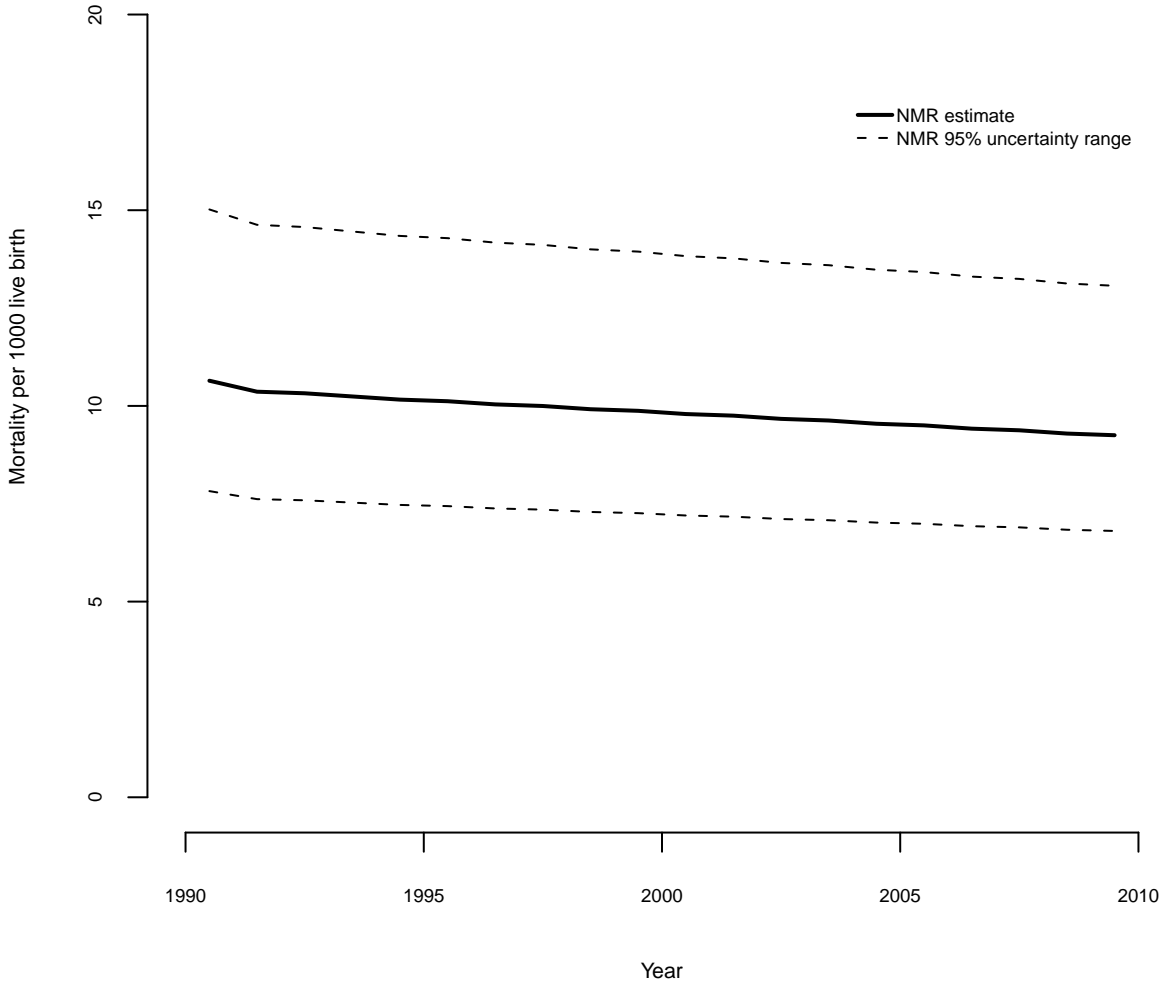

### Tonga NMR and U5MR

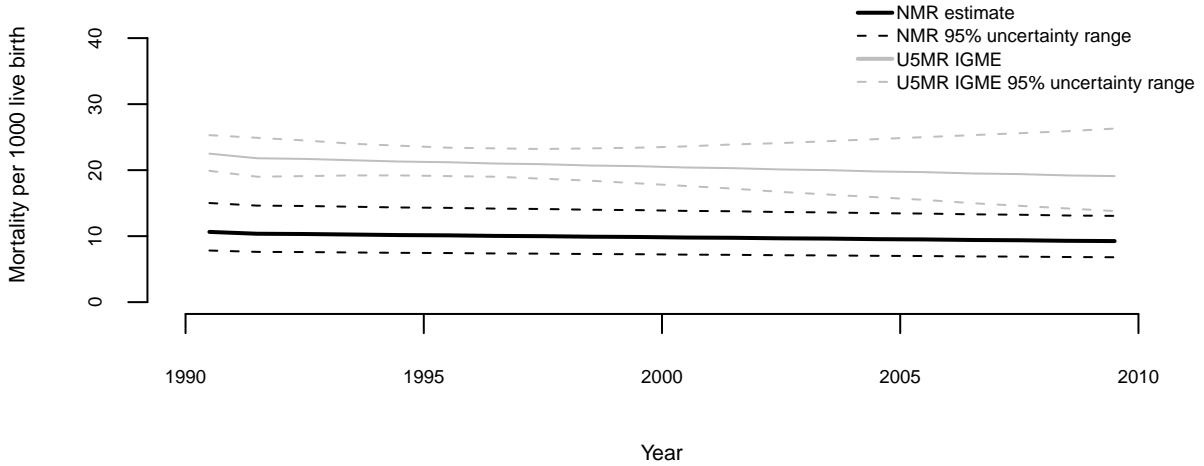

### Tonga NMR as percentage of U5MR

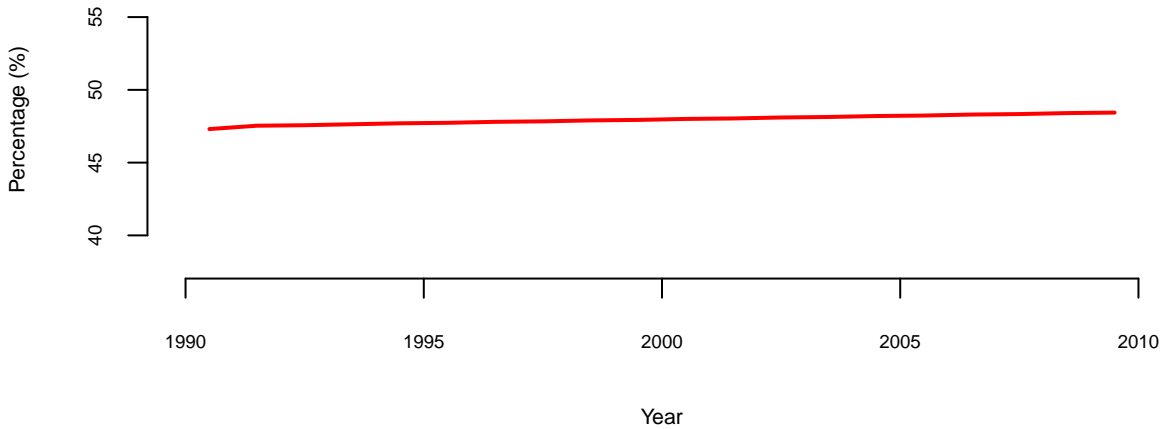

### Trinidad and Tobago Data, and estimated NMR

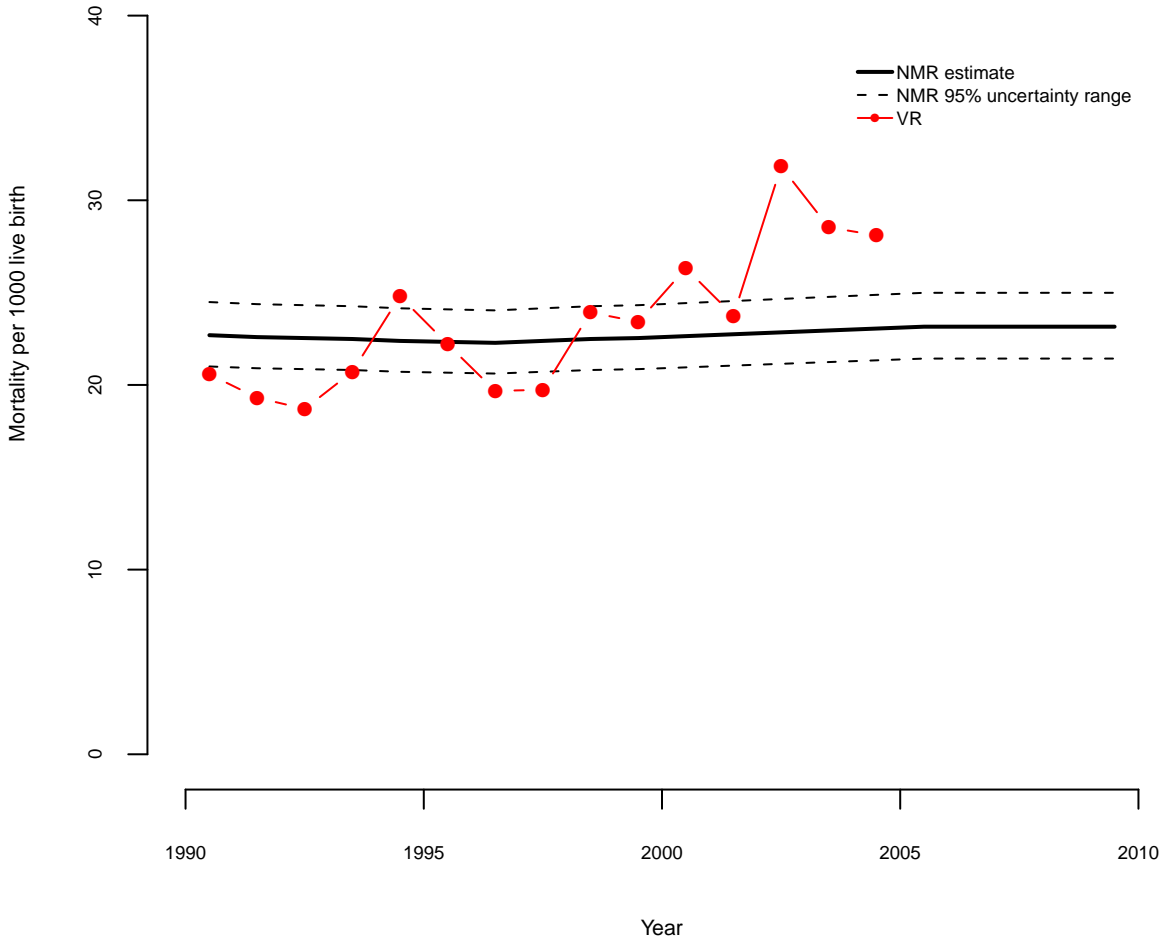

### Trinidad and Tobago NMR and U5MR

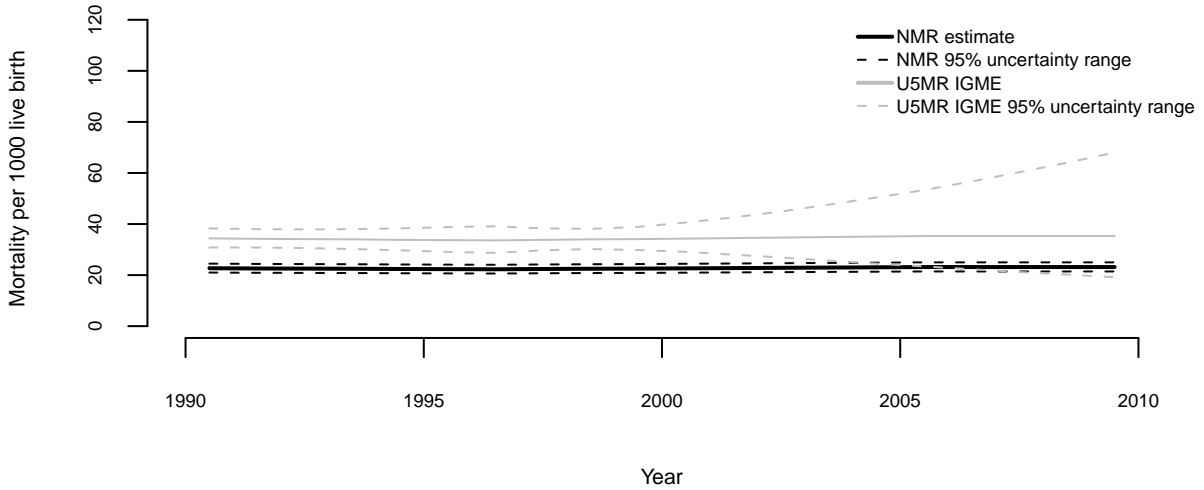

### Trinidad and Tobago NMR as percentage of U5MR

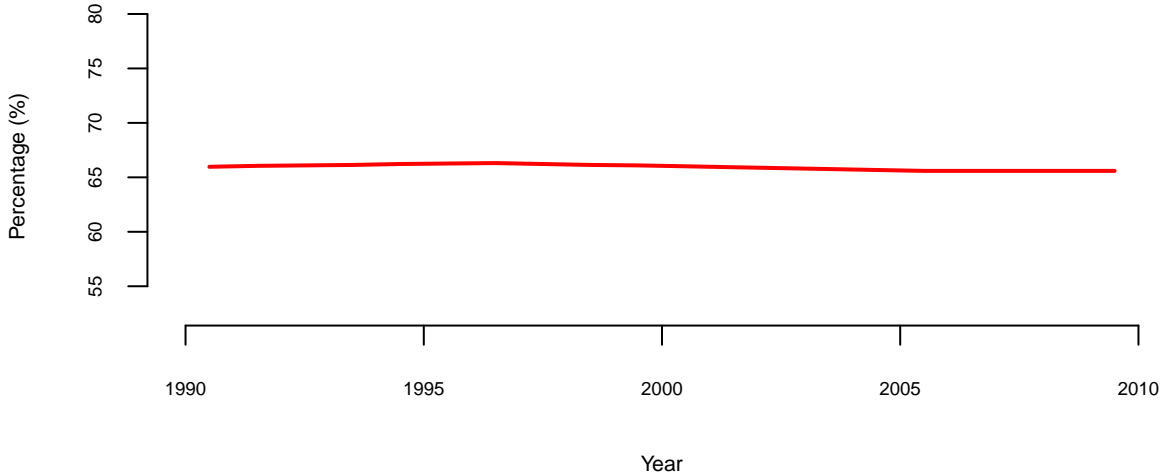

Tunisia  
Data, and estimated NMR

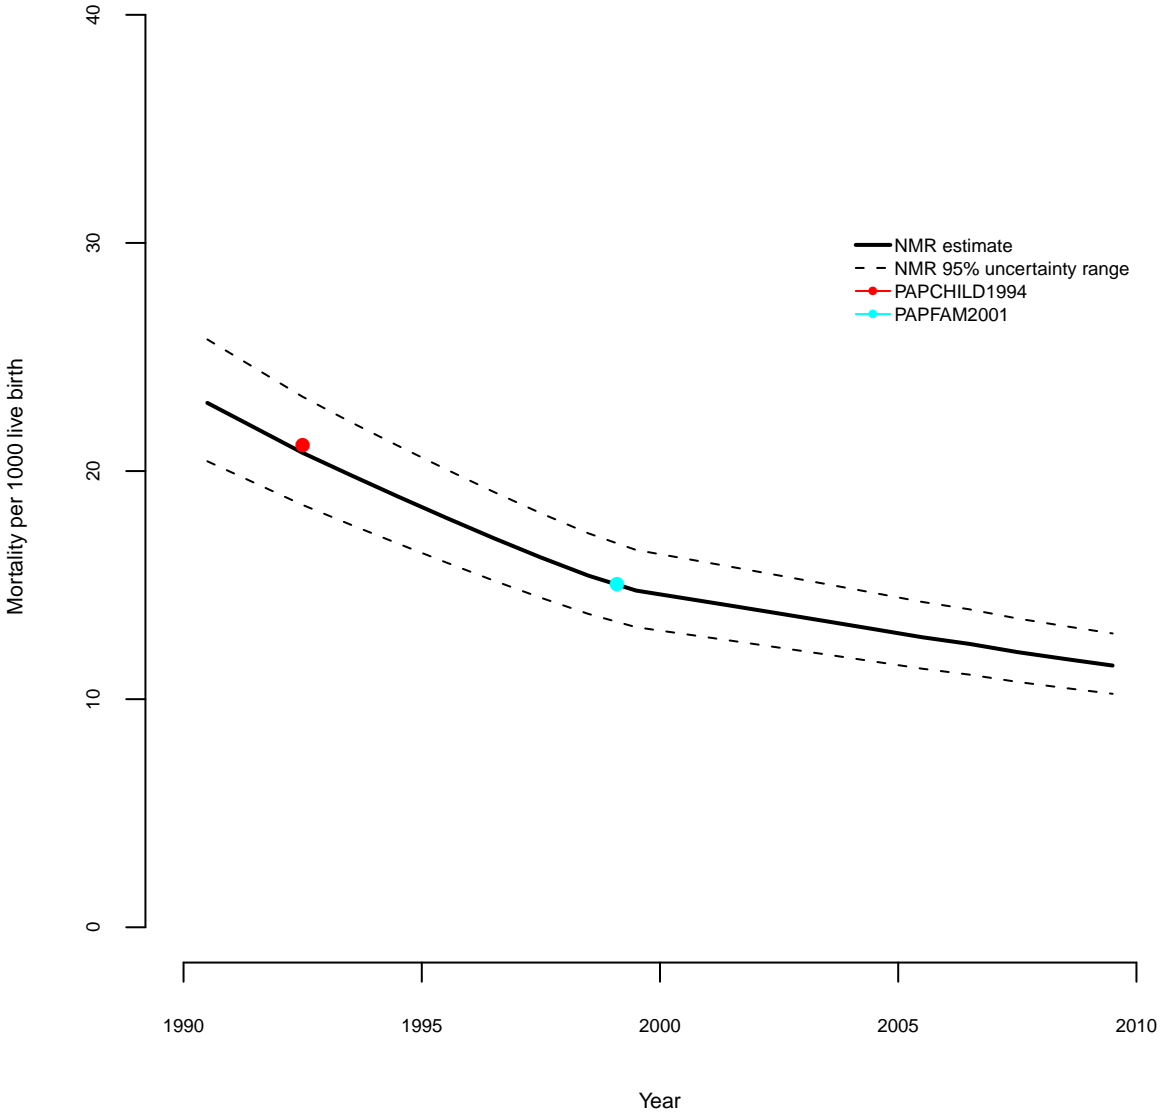

### Tunisia NMR and U5MR

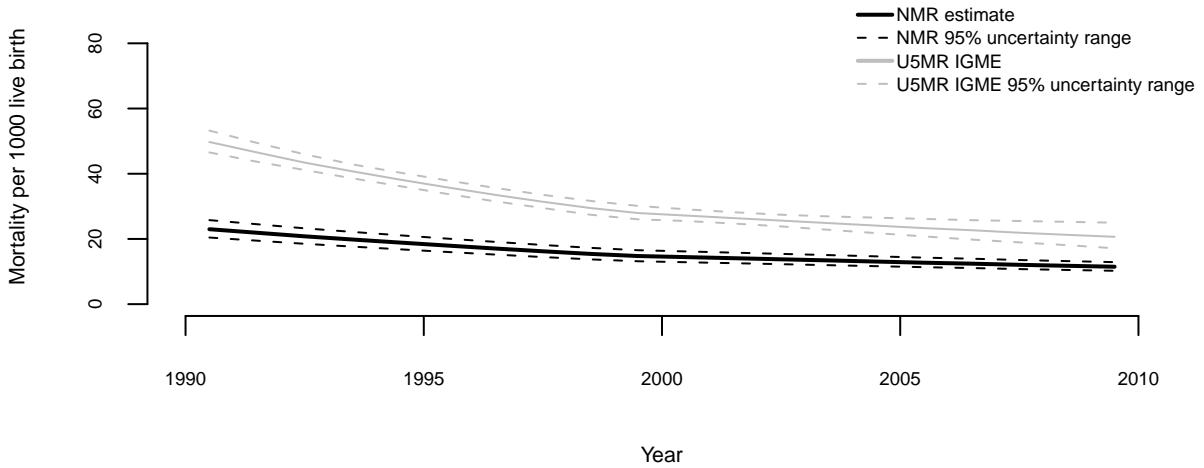

### Tunisia NMR as percentage of U5MR

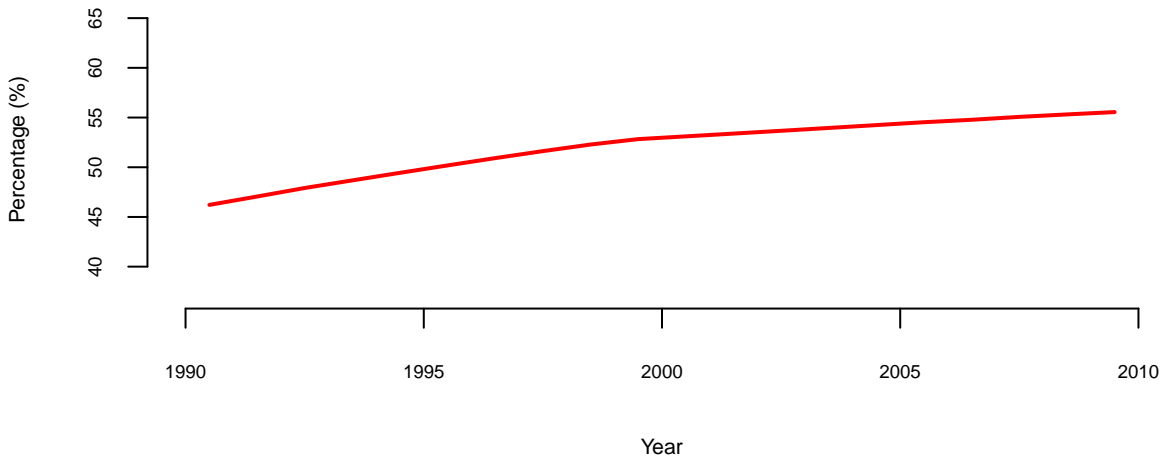



Turkey  
Data, and estimated NMR

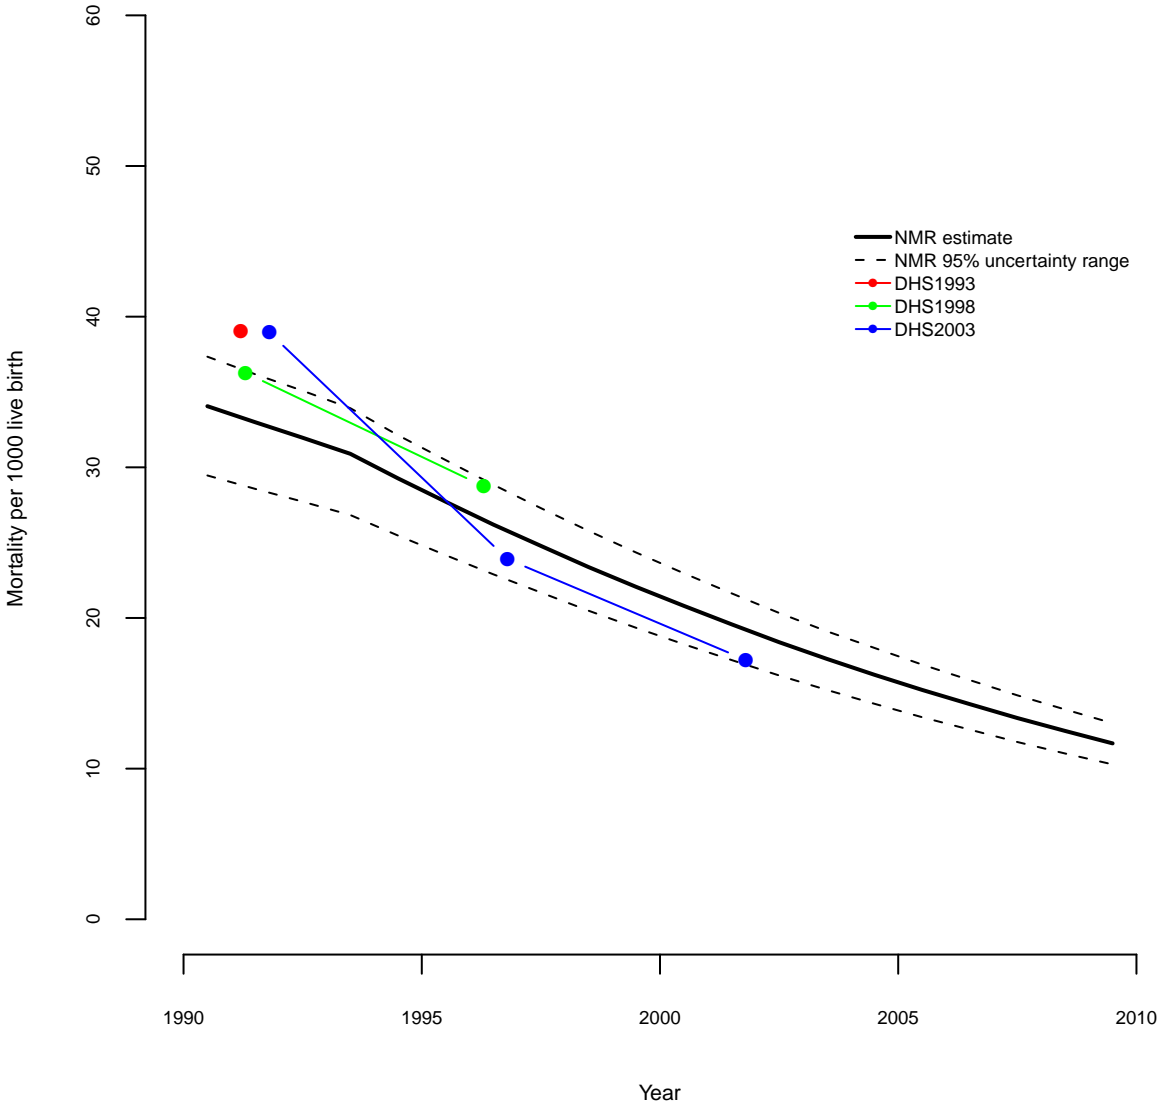

### Turkey NMR and U5MR

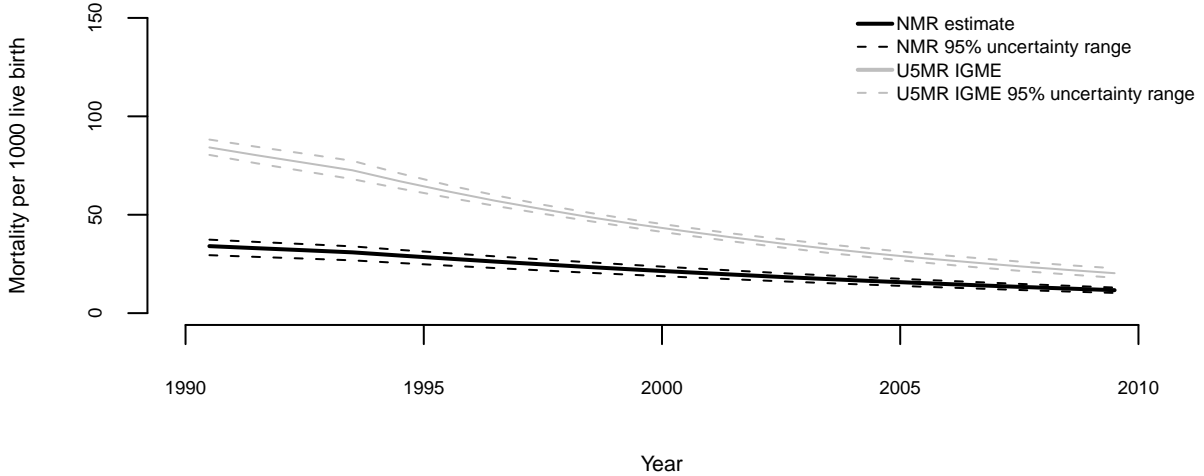

### Turkey NMR as percentage of U5MR

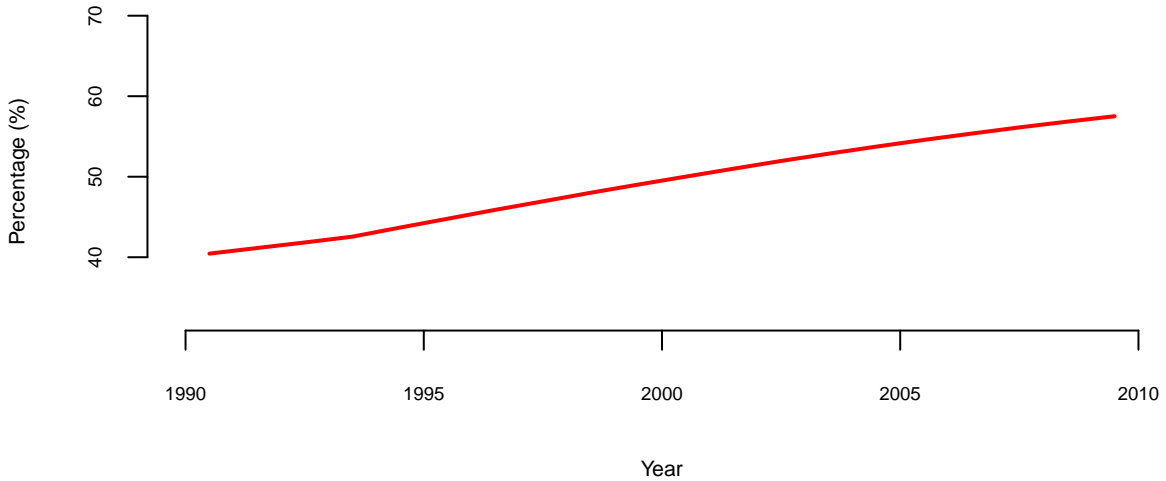

### Turkmenistan Data, and estimated NMR

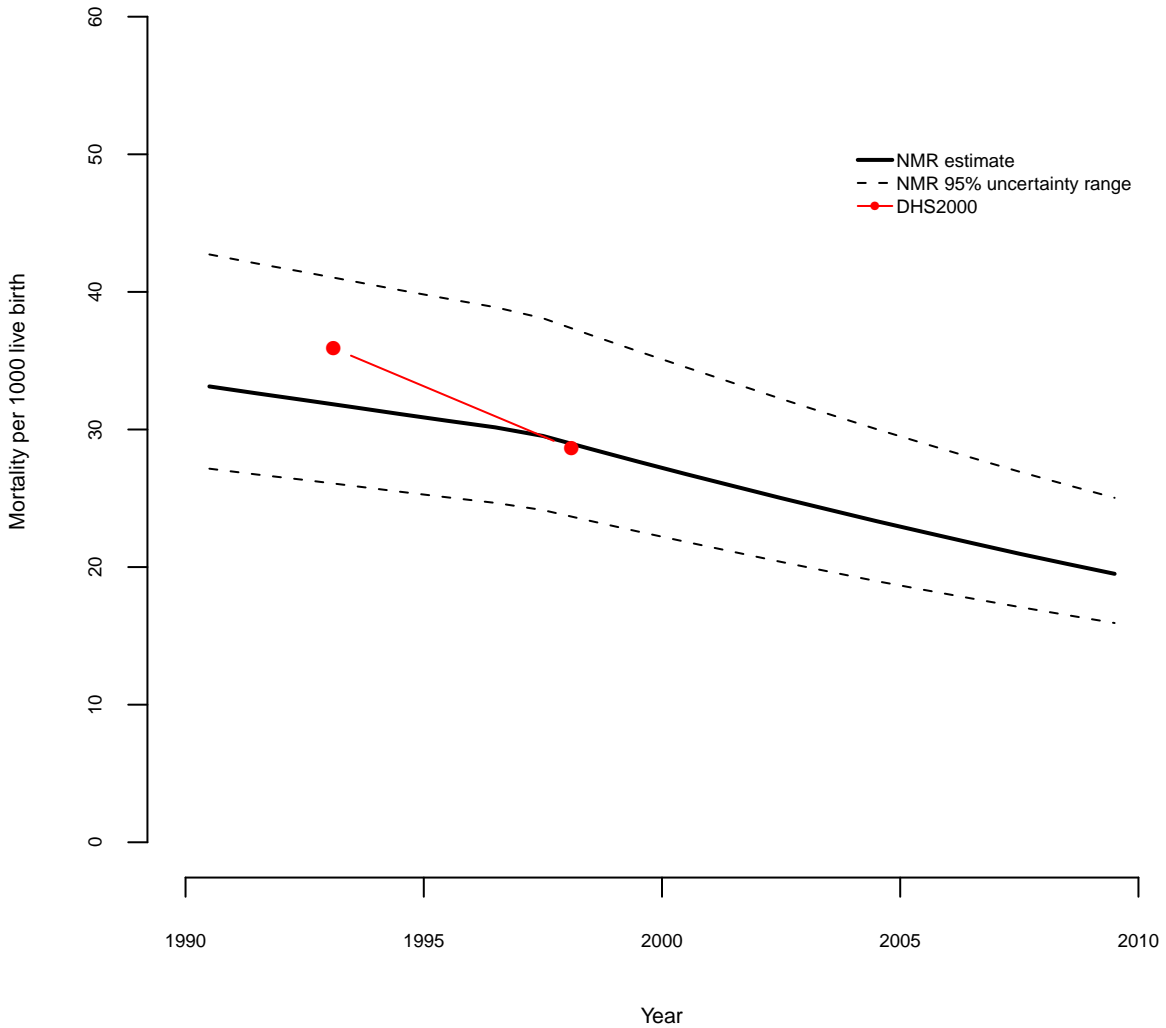

### Turkmenistan NMR and U5MR

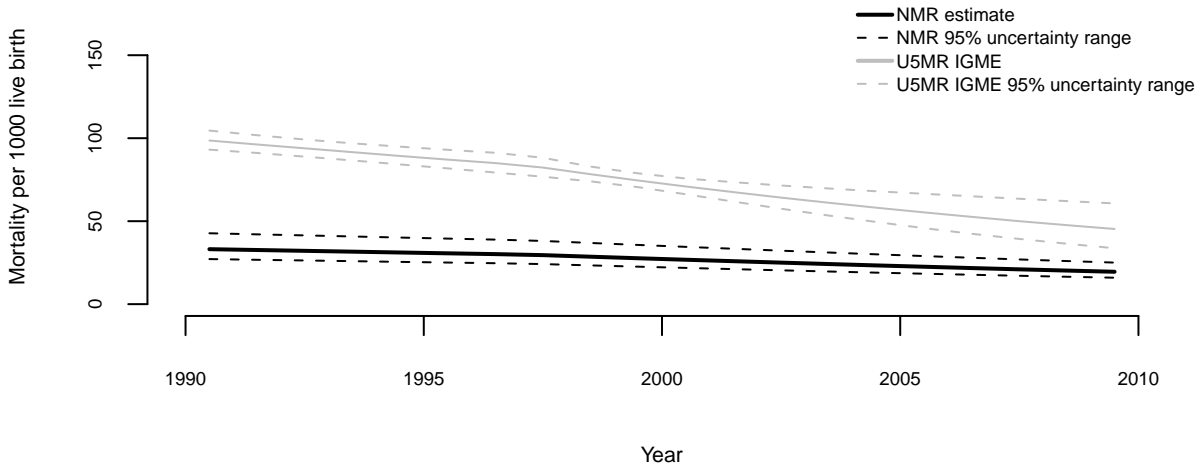

### Turkmenistan NMR as percentage of U5MR

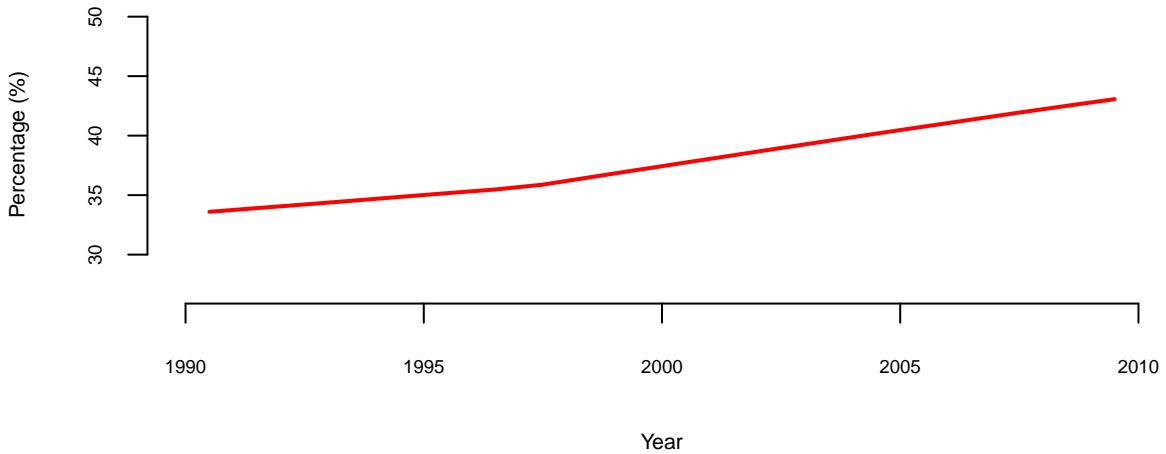

**Tuvalu**  
**Data, and estimated NMR**

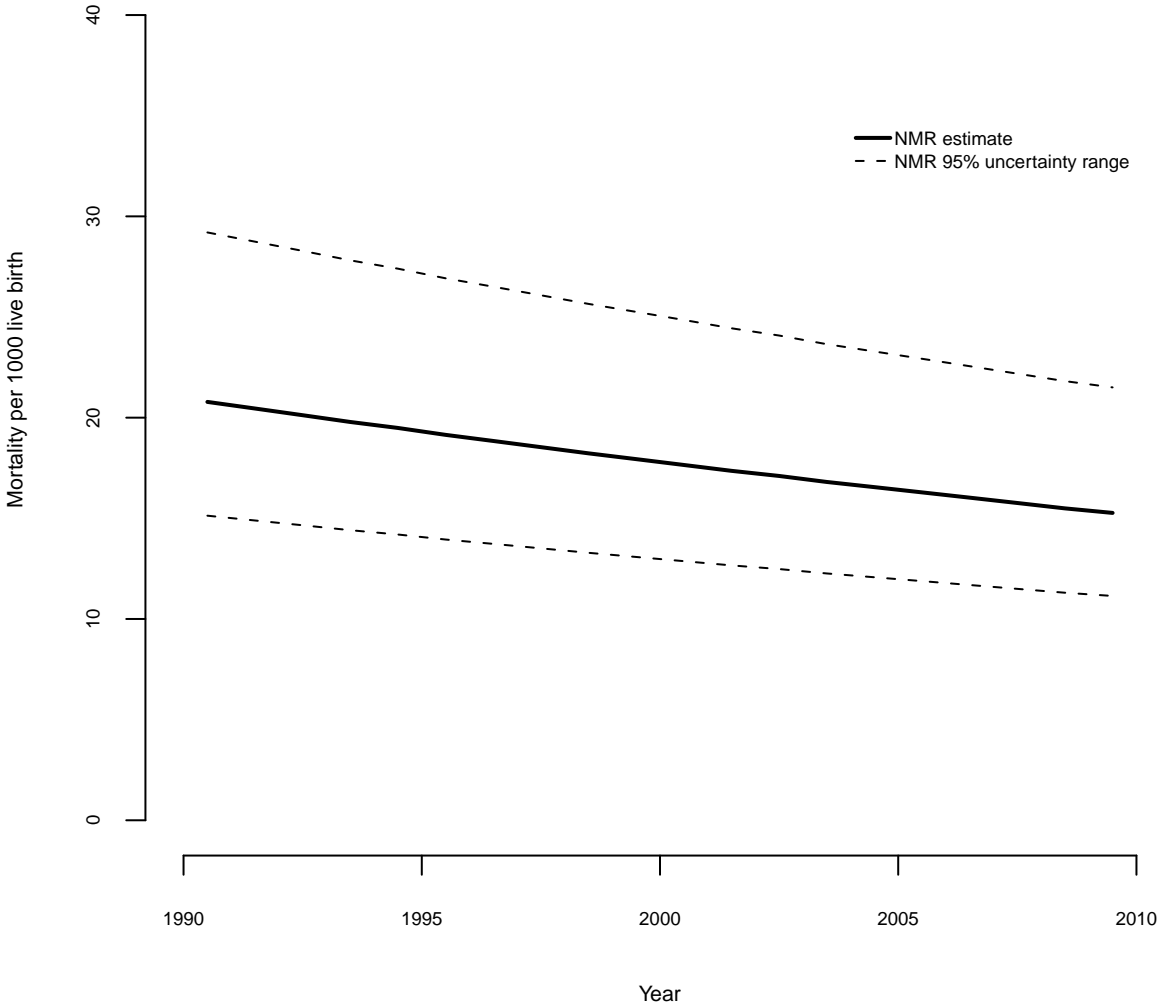

### Tuvalu NMR and U5MR

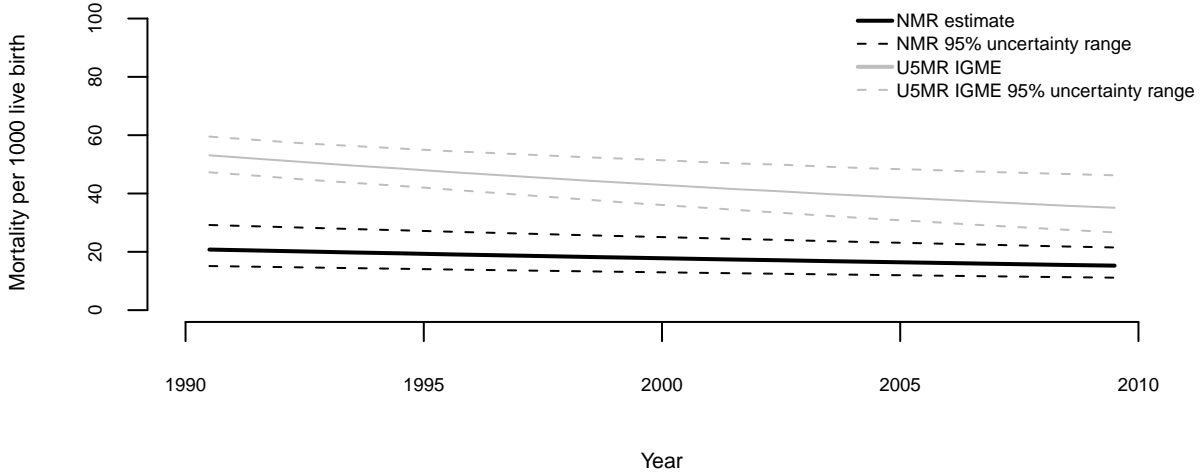

### Tuvalu NMR as percentage of U5MR

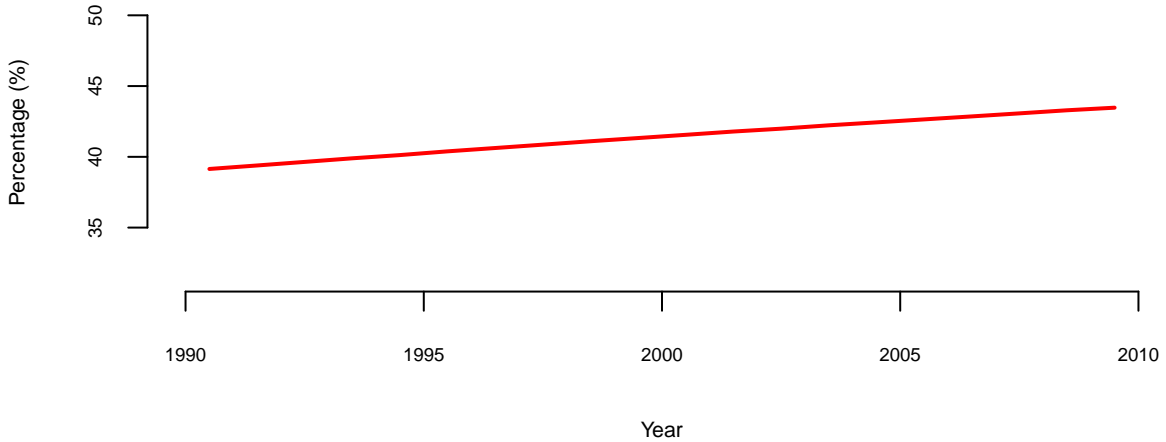

# Uganda

## Data, and estimated NMR

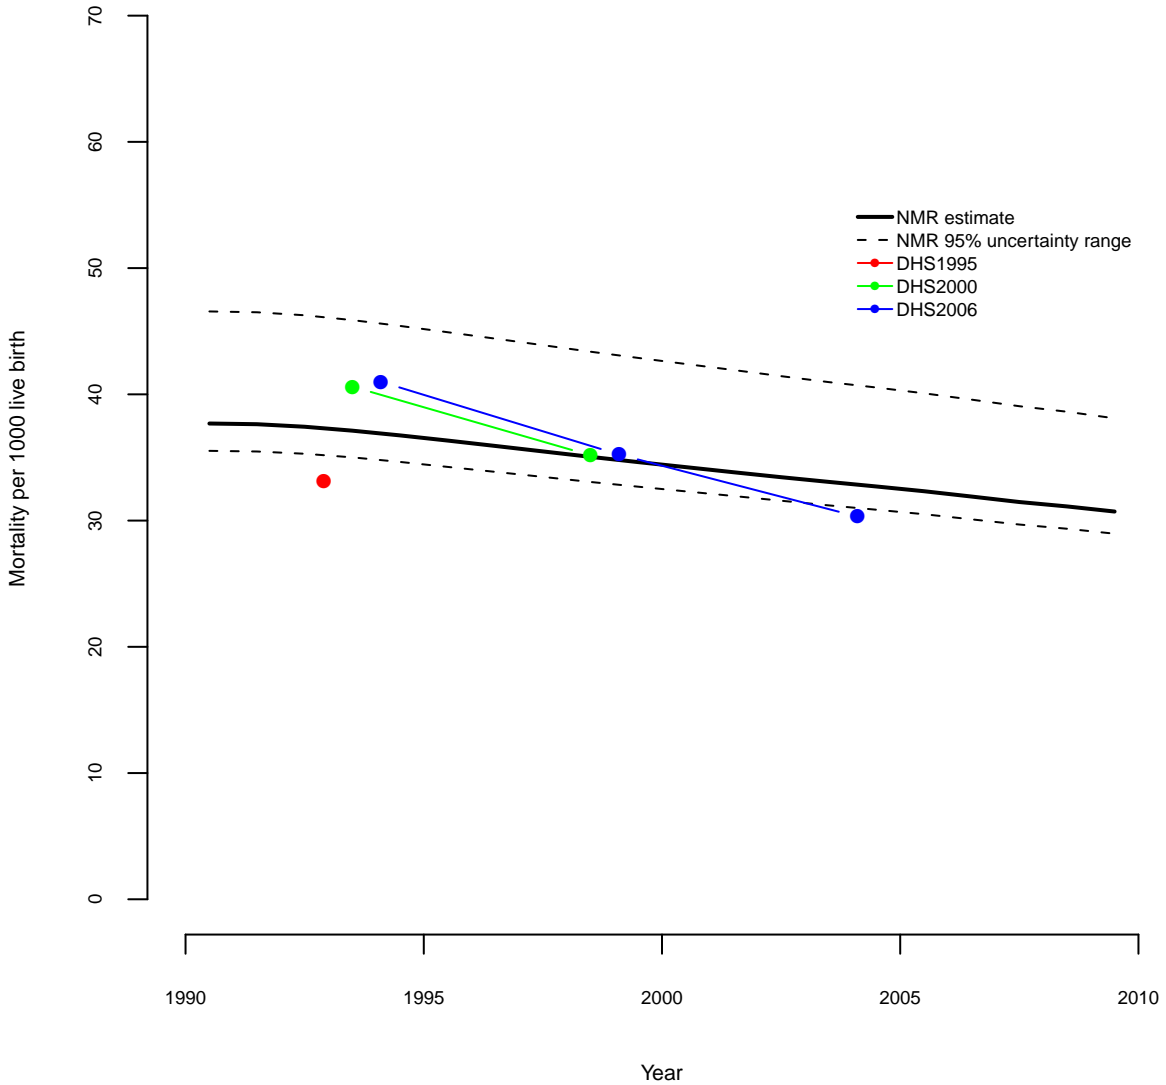

### Uganda NMR and U5MR

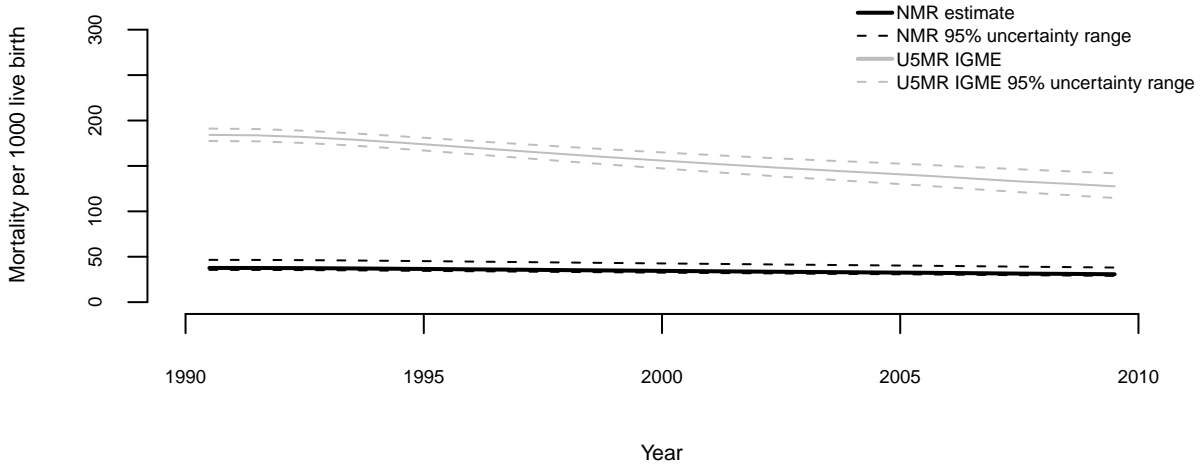

### Uganda NMR as percentage of U5MR

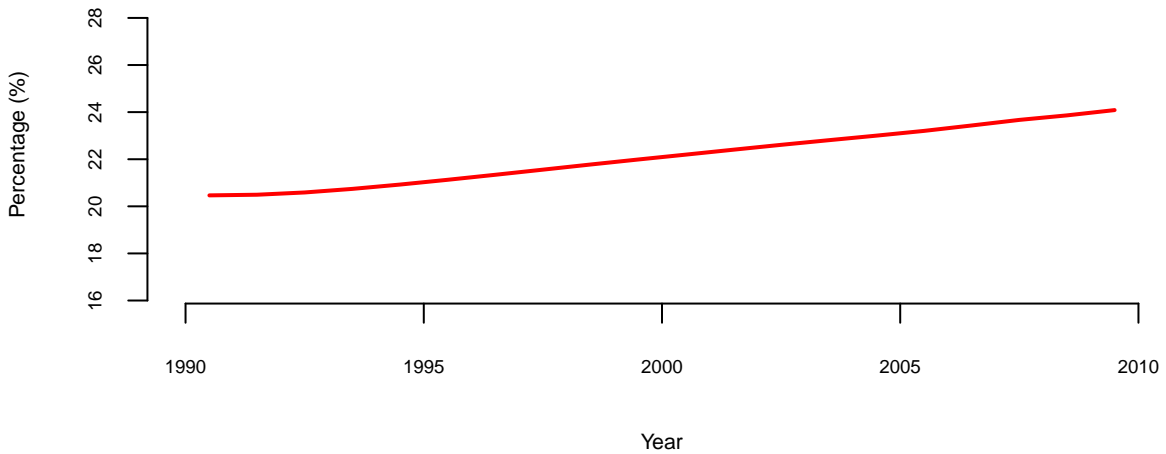



# Ukraine

## Data, and estimated NMR

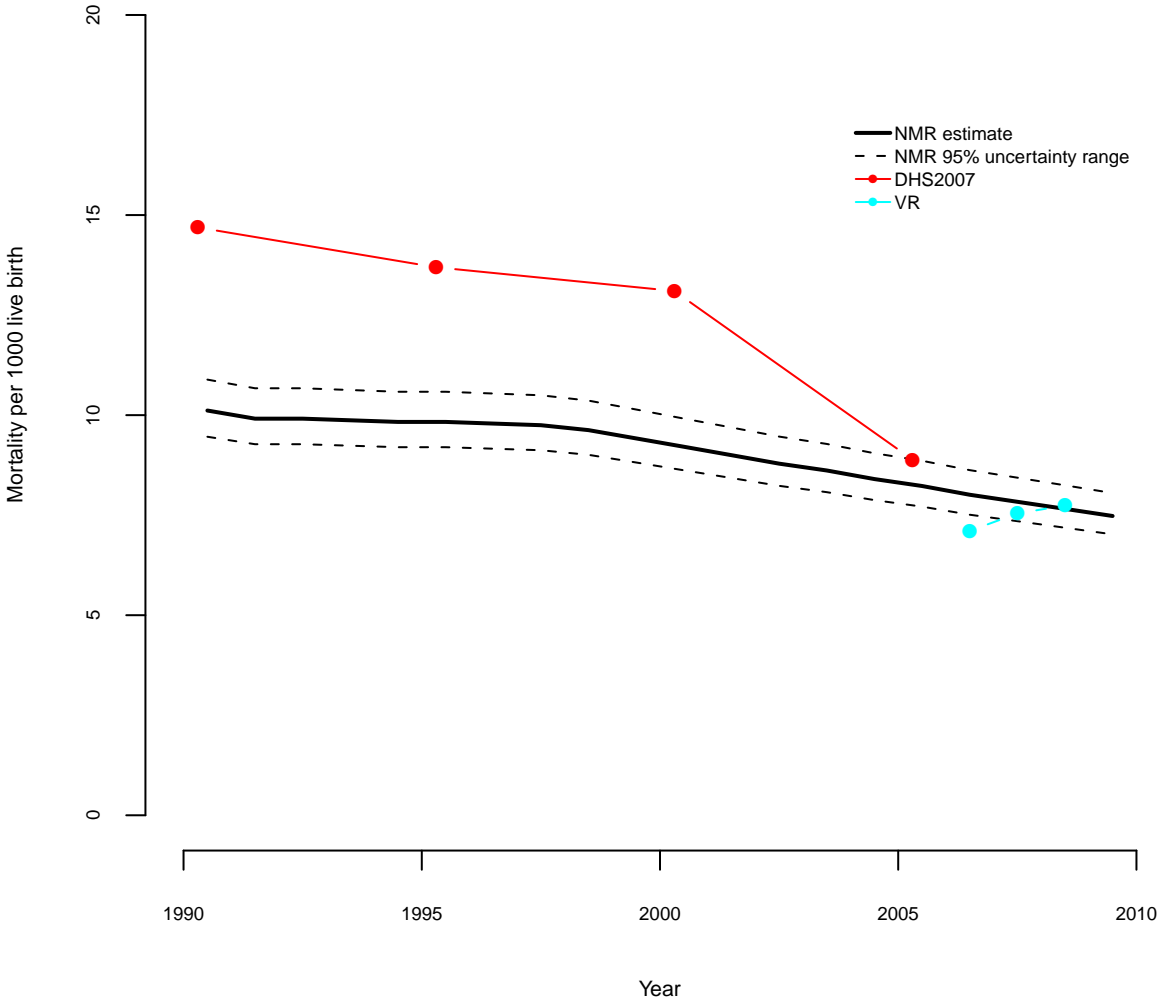

### Ukraine NMR and U5MR

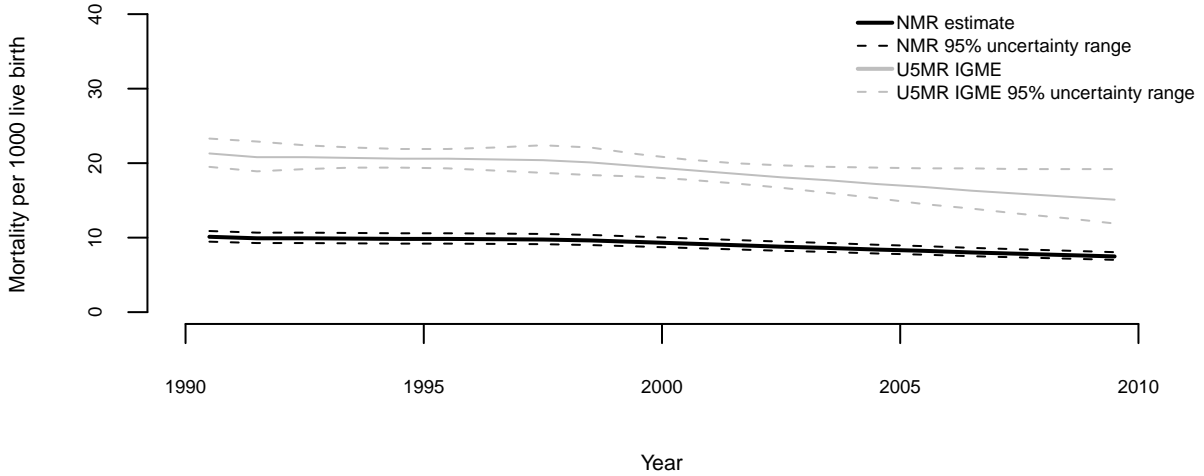

### Ukraine NMR as percentage of U5MR

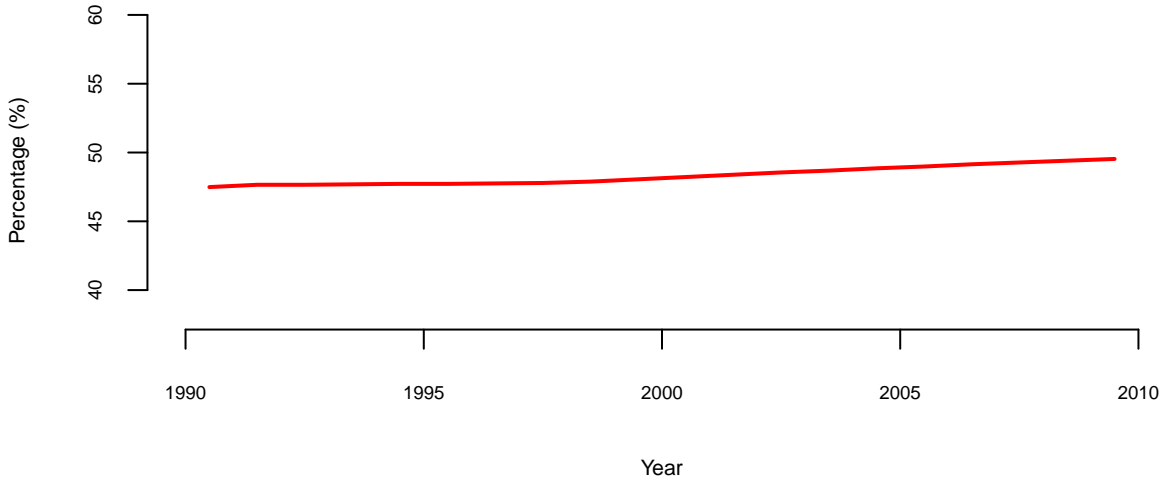

United Arab Emirates  
Data, and estimated NMR

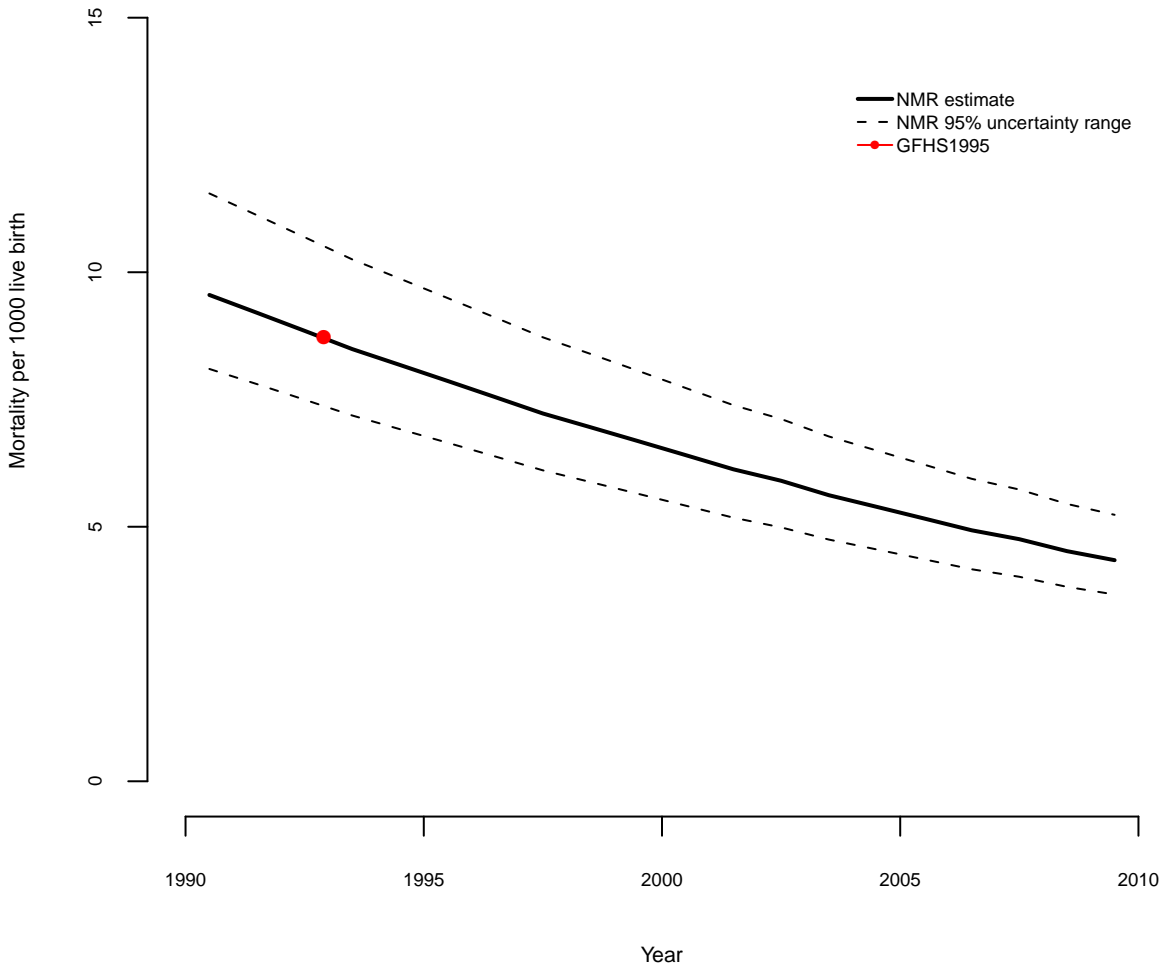

### United Arab Emirates NMR and U5MR

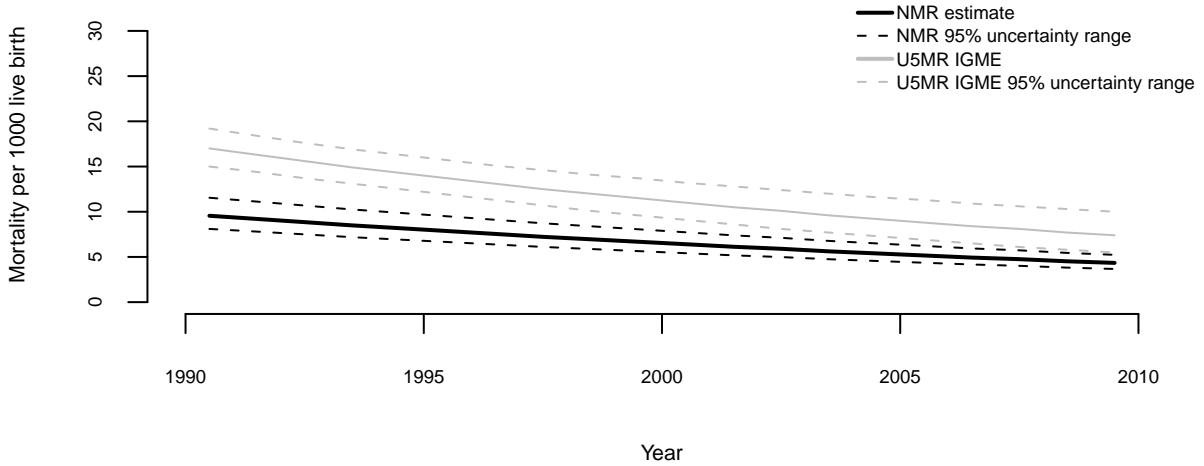

### United Arab Emirates NMR as percentage of U5MR

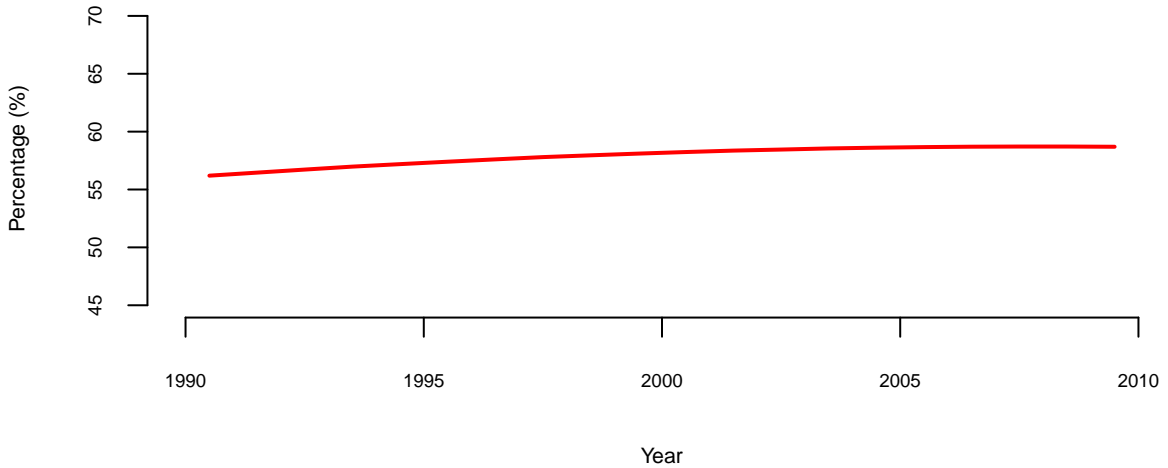

United Kingdom  
Data, and estimated NMR

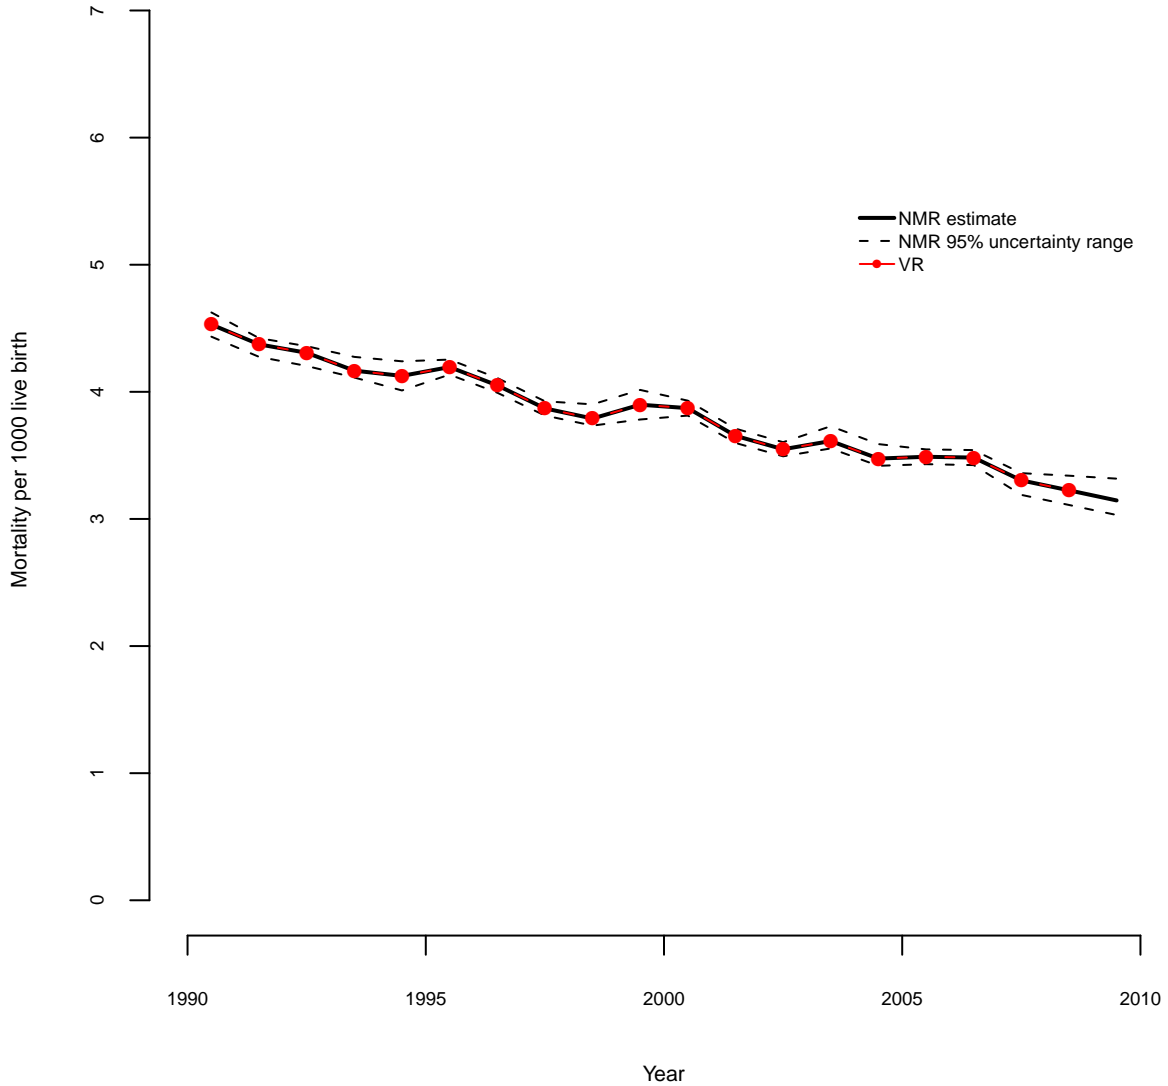

### United Kingdom NMR and U5MR

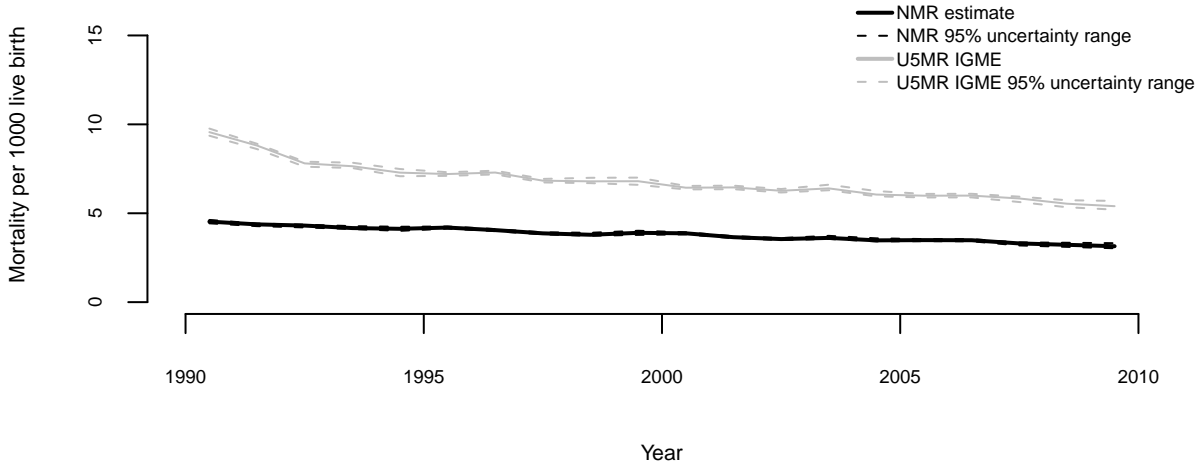

### United Kingdom NMR as percentage of U5MR

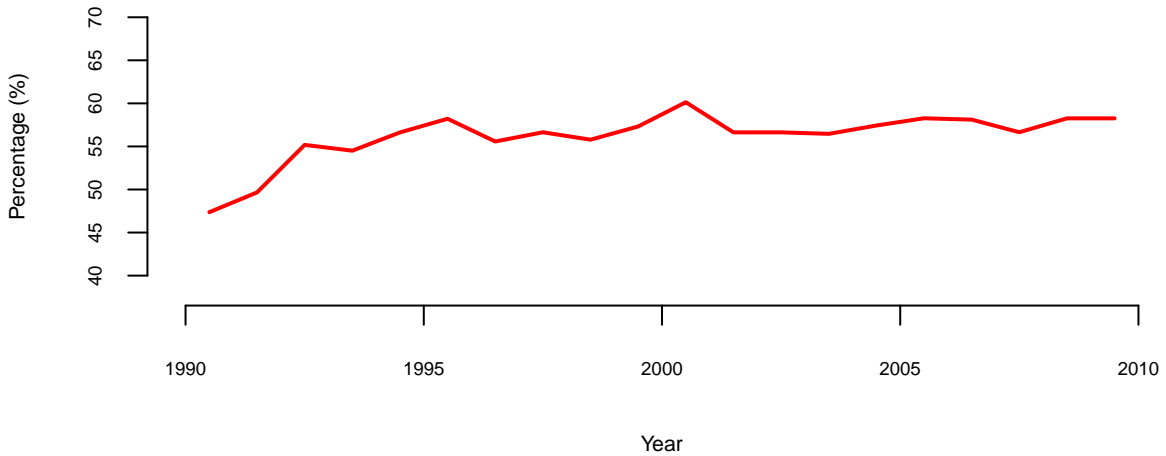

United Republic of Tanzania  
Data, and estimated NMR

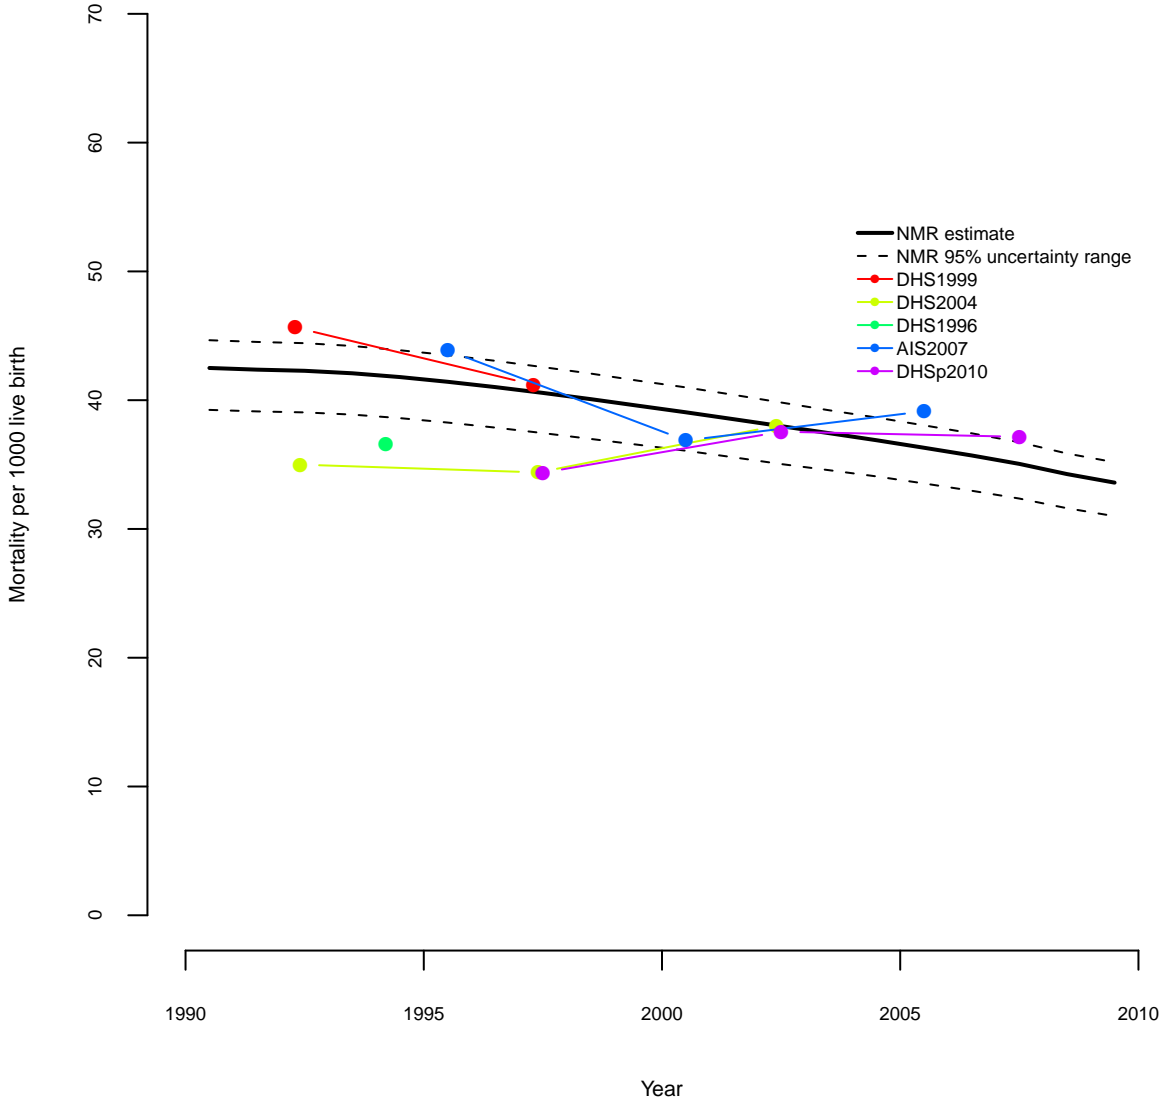

### United Republic of Tanzania NMR and U5MR

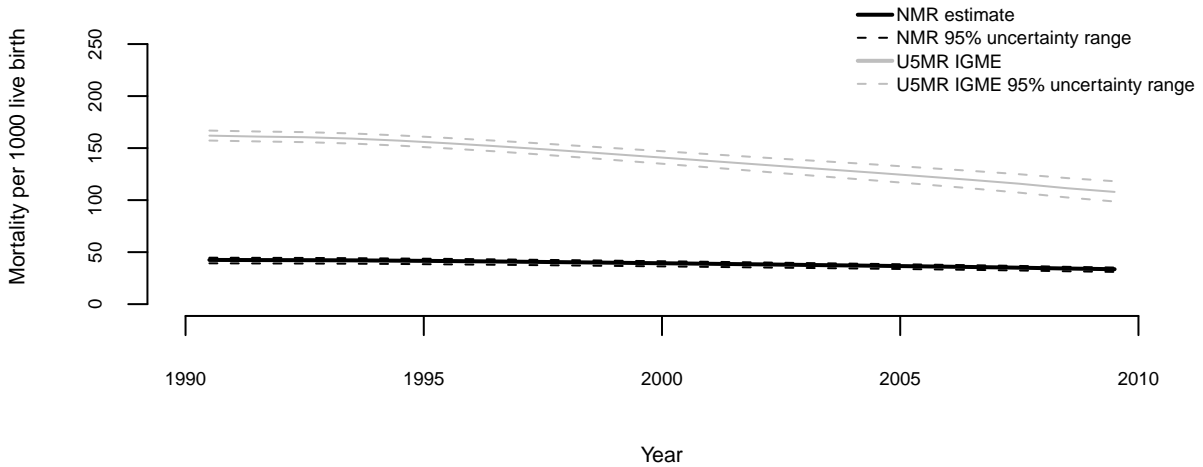

### United Republic of Tanzania NMR as percentage of U5MR

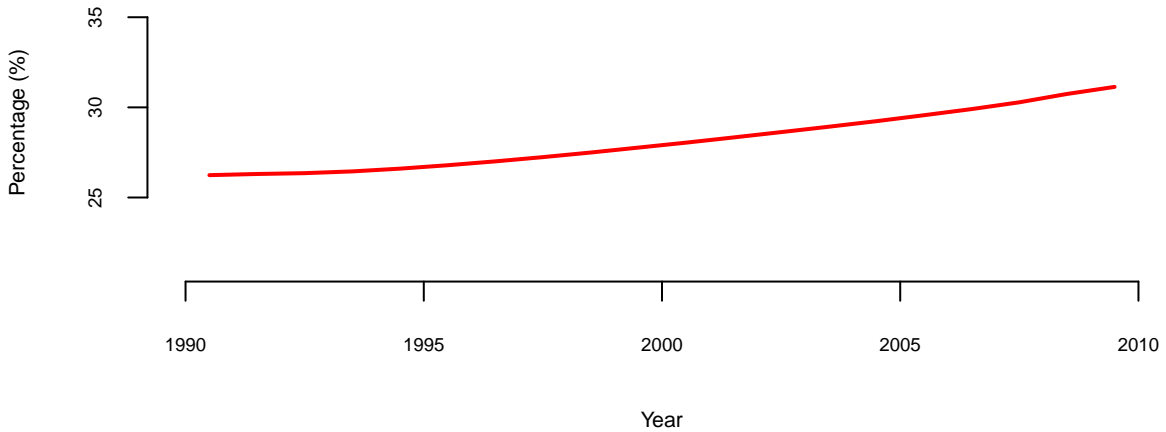



United States  
Data, and estimated NMR

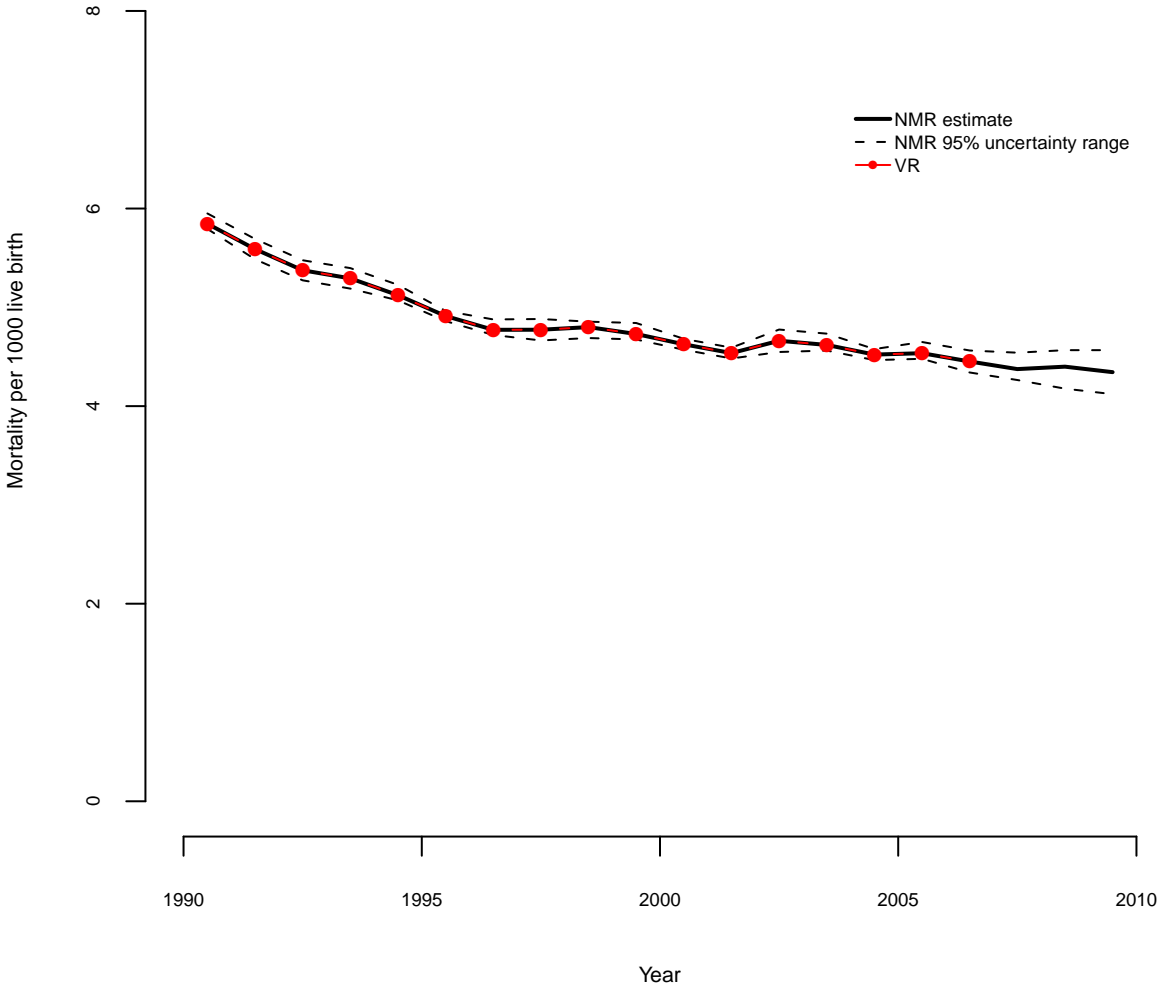

### United States NMR and U5MR

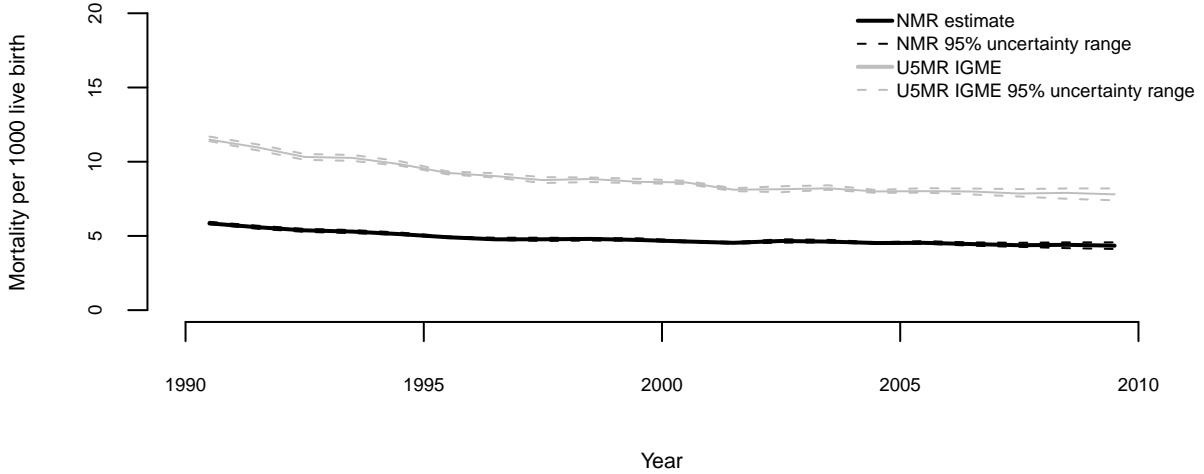

### United States NMR as percentage of U5MR

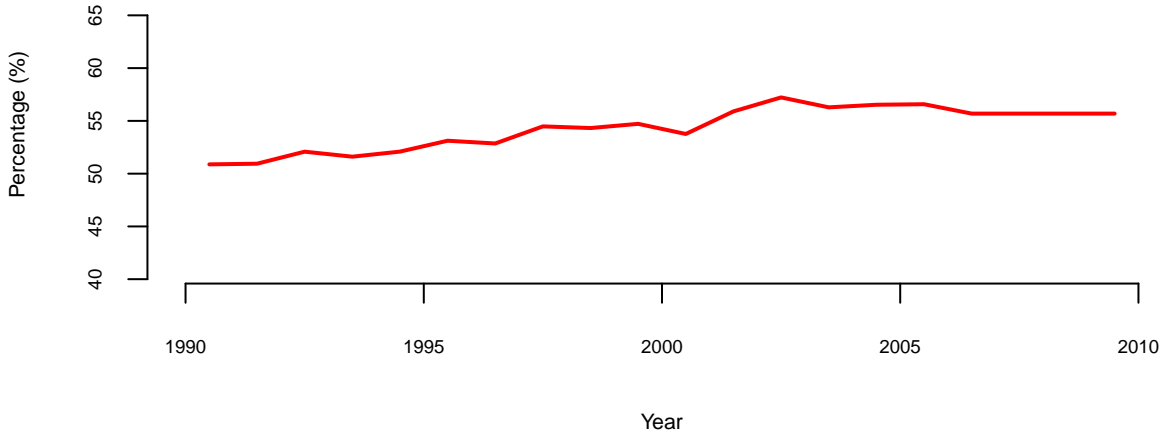

# Uruguay

## Data, and estimated NMR

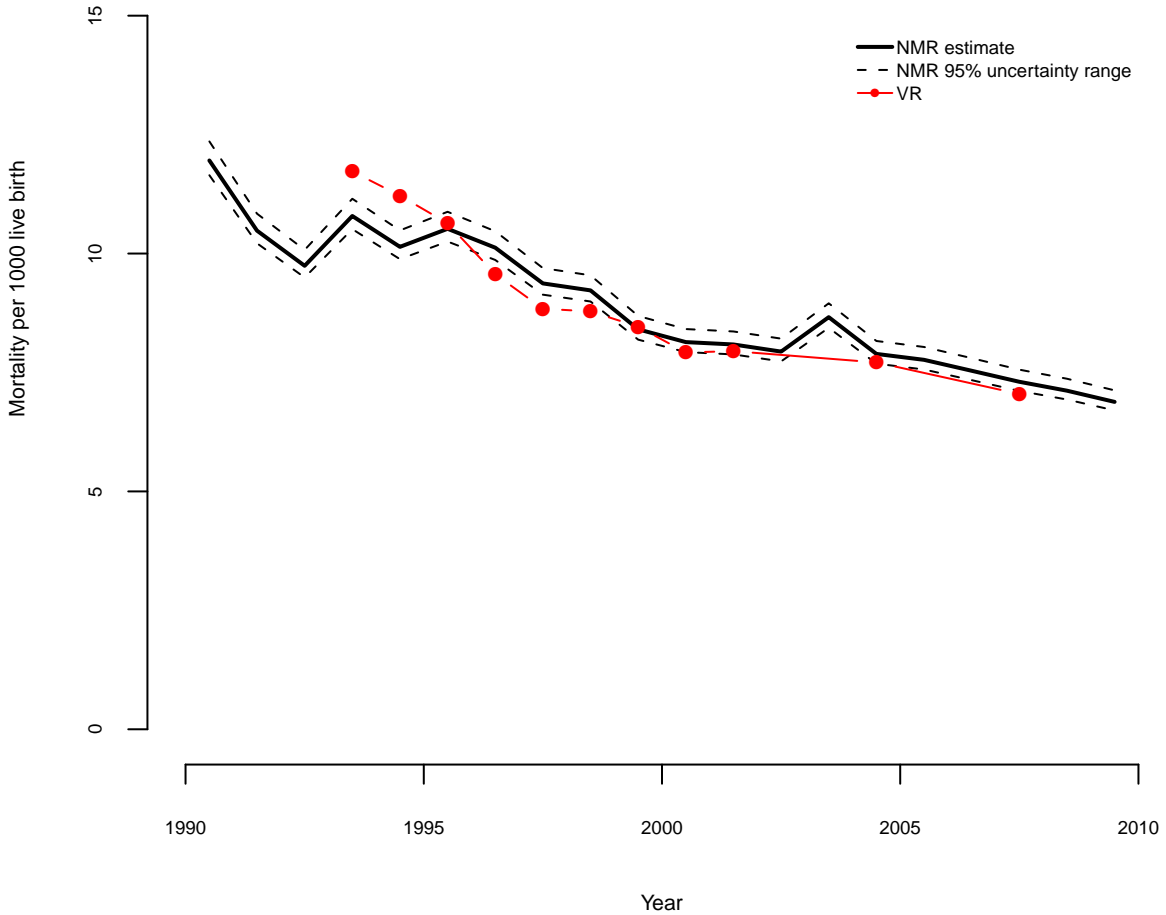

### Uruguay NMR and U5MR

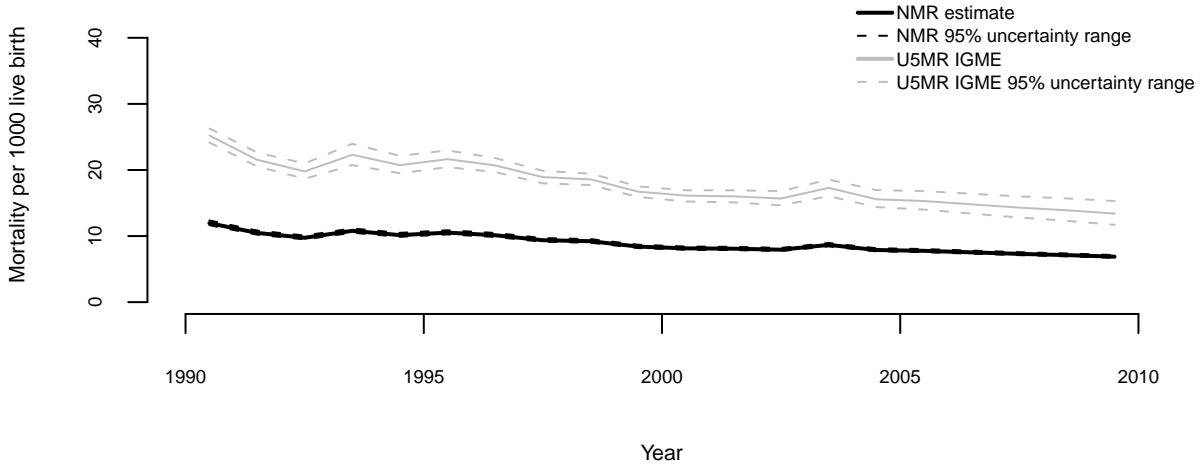

### Uruguay NMR as percentage of U5MR

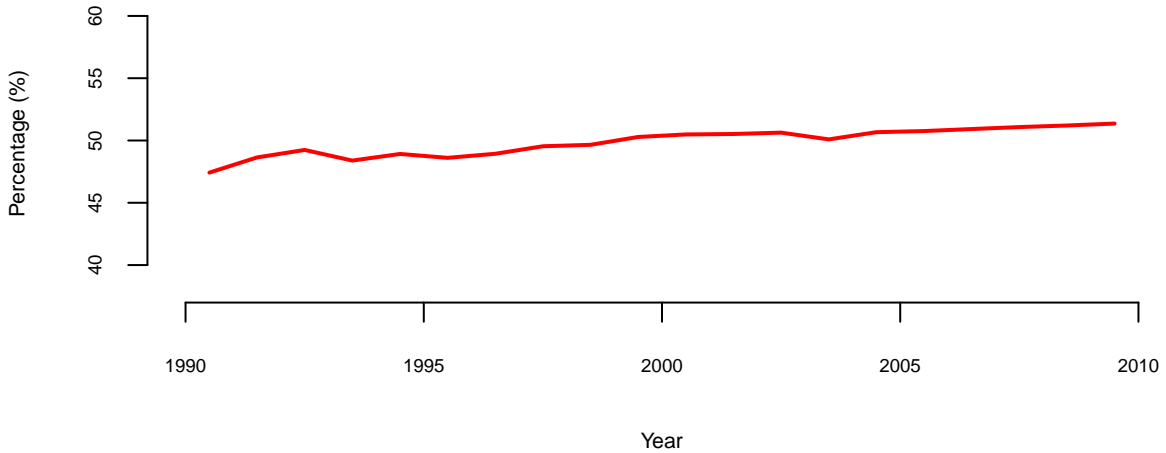

### Uzbekistan Data, and estimated NMR

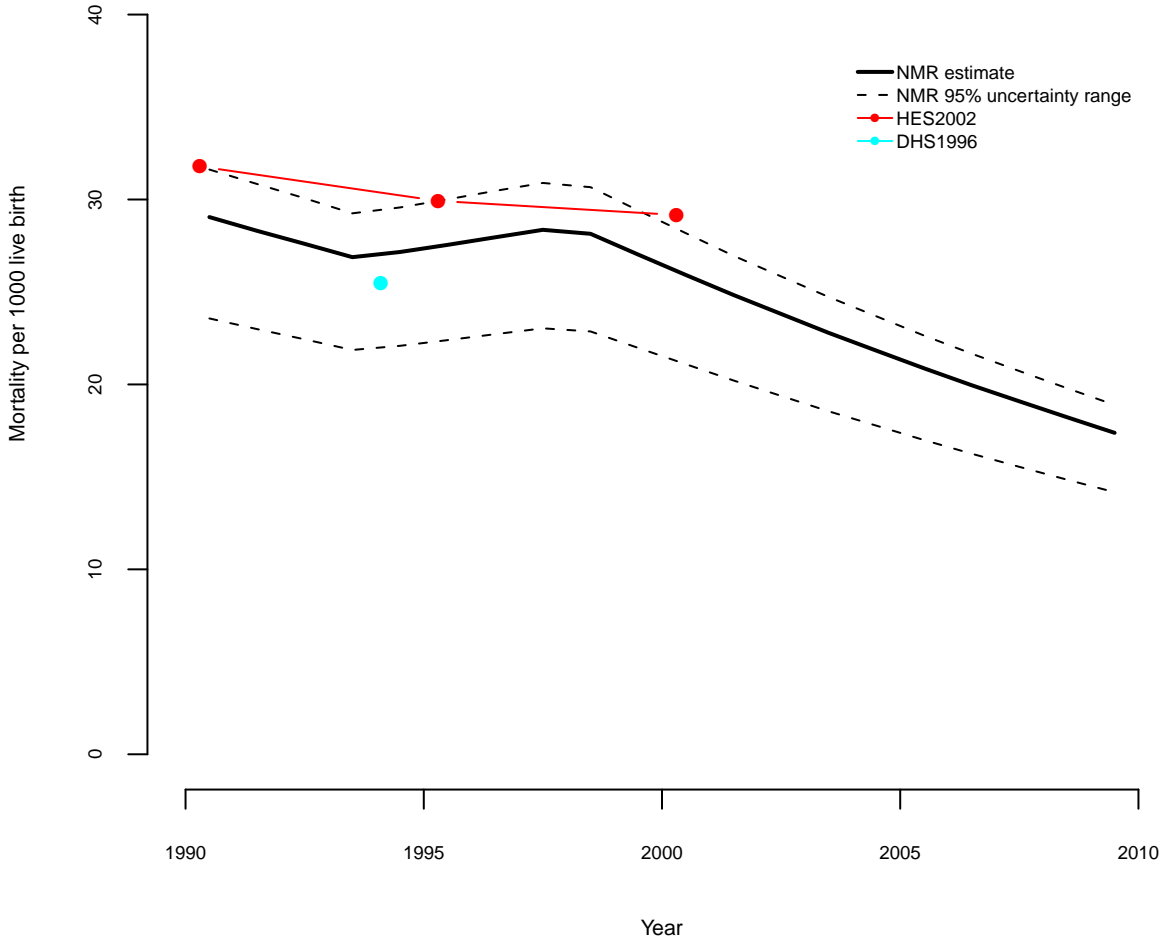

### Uzbekistan NMR and U5MR

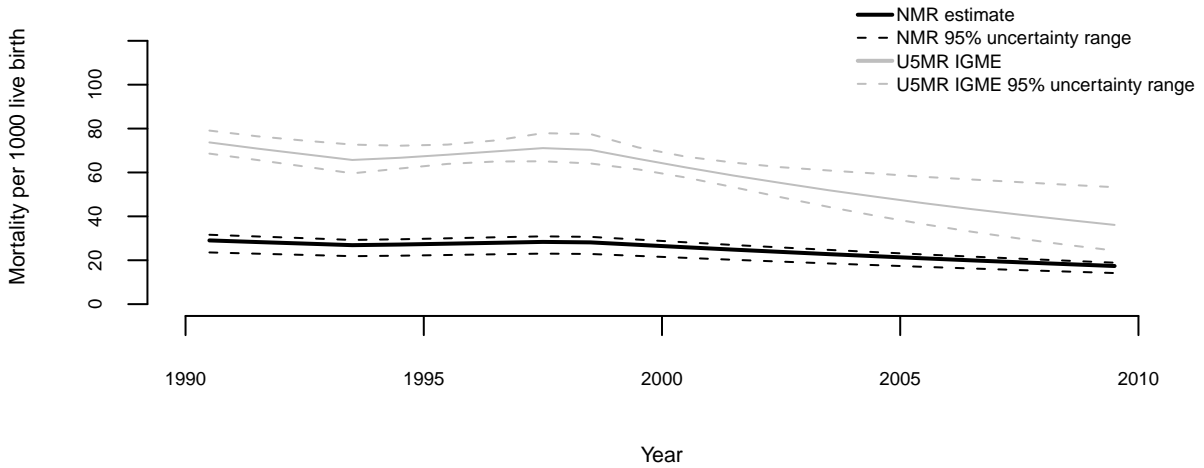

### Uzbekistan NMR as percentage of U5MR

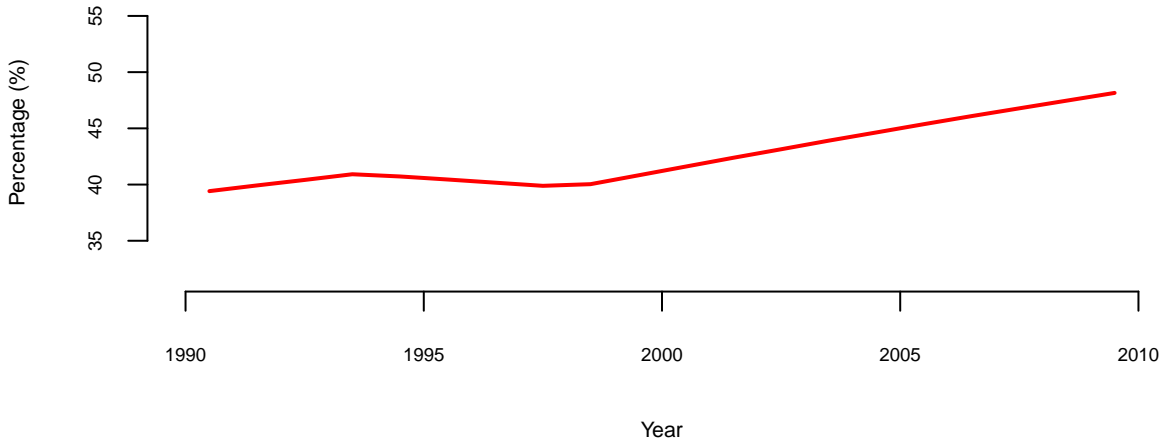

**Vanuatu**  
**Data, and estimated NMR**

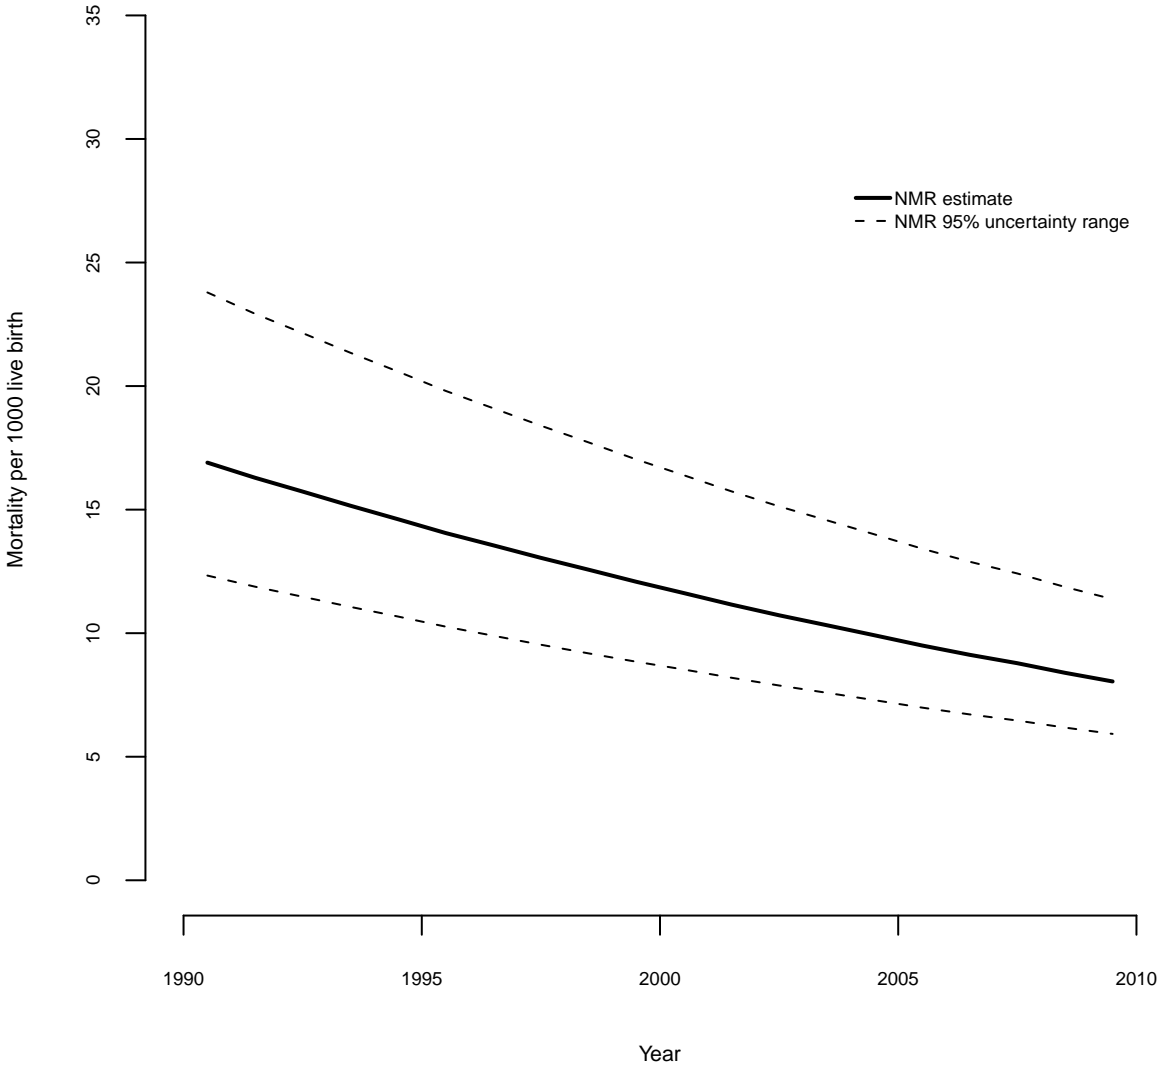

### Vanuatu NMR and U5MR

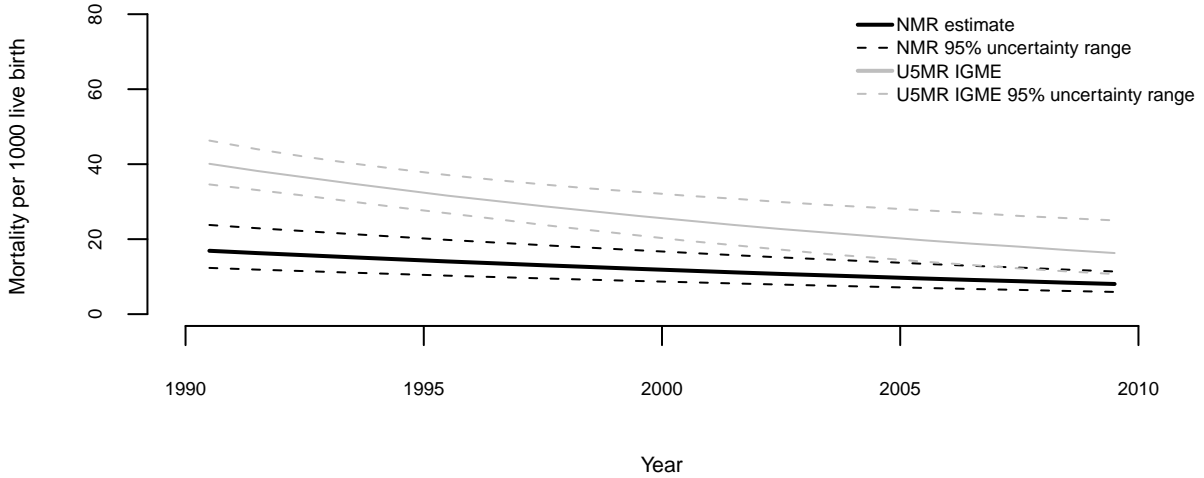

### Vanuatu NMR as percentage of U5MR

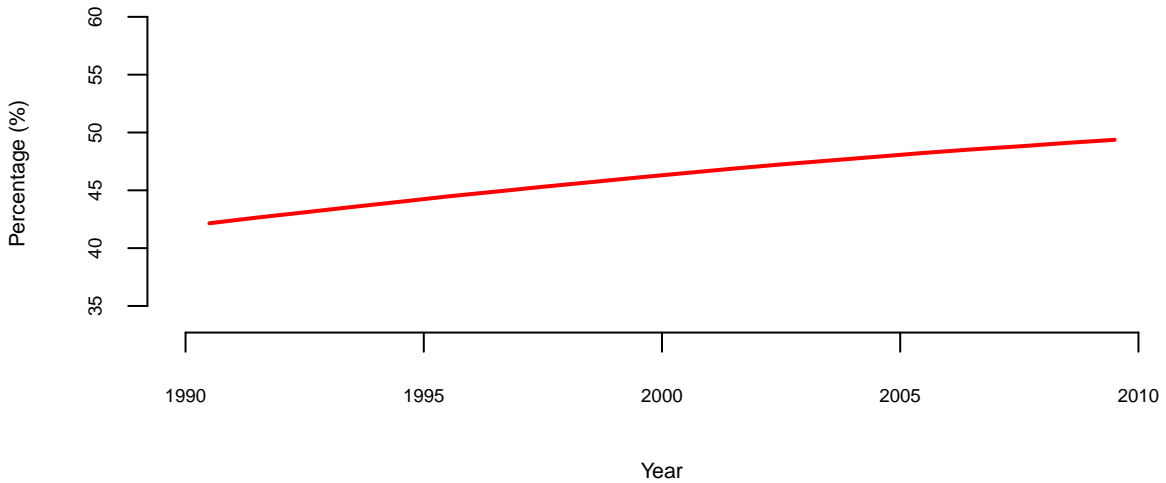



### Venezuela Data, and estimated NMR

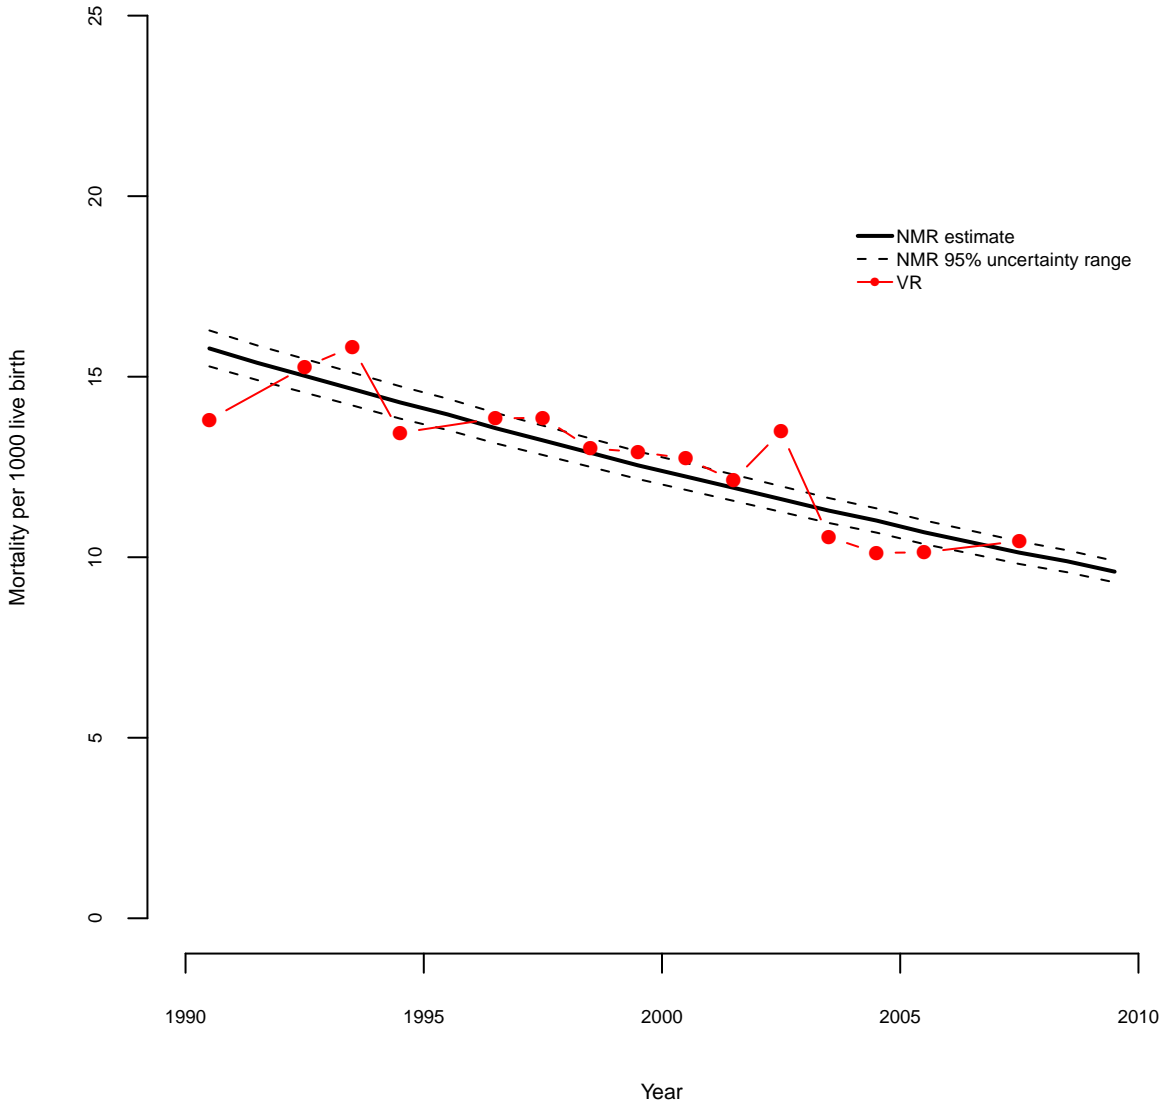

### Venezuela NMR and U5MR

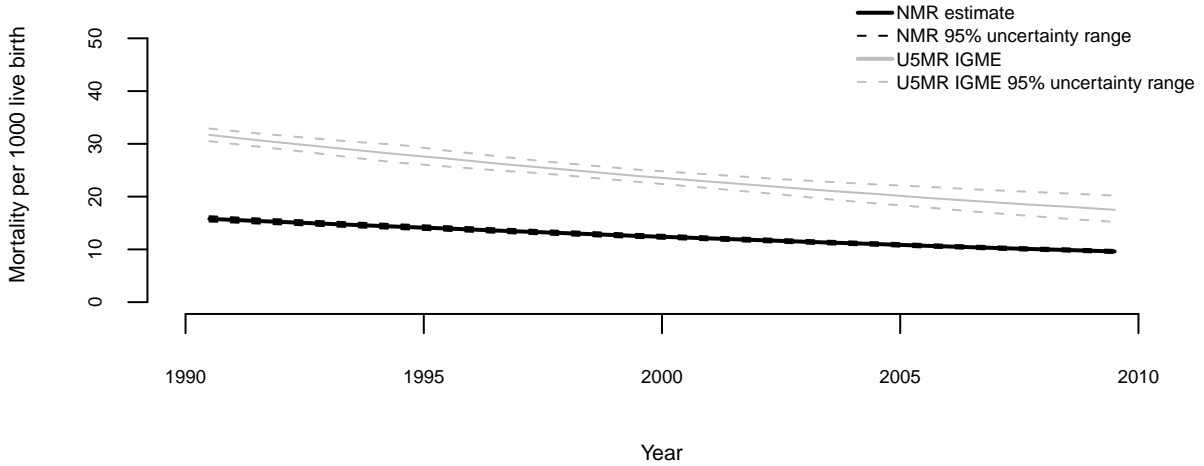

### Venezuela NMR as percentage of U5MR

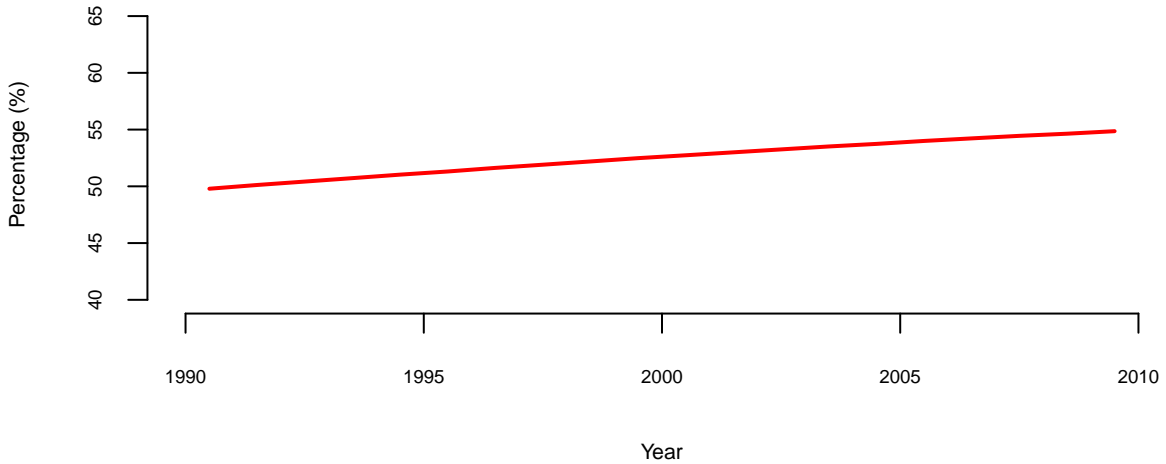

**Viet Nam**  
**Data, and estimated NMR**

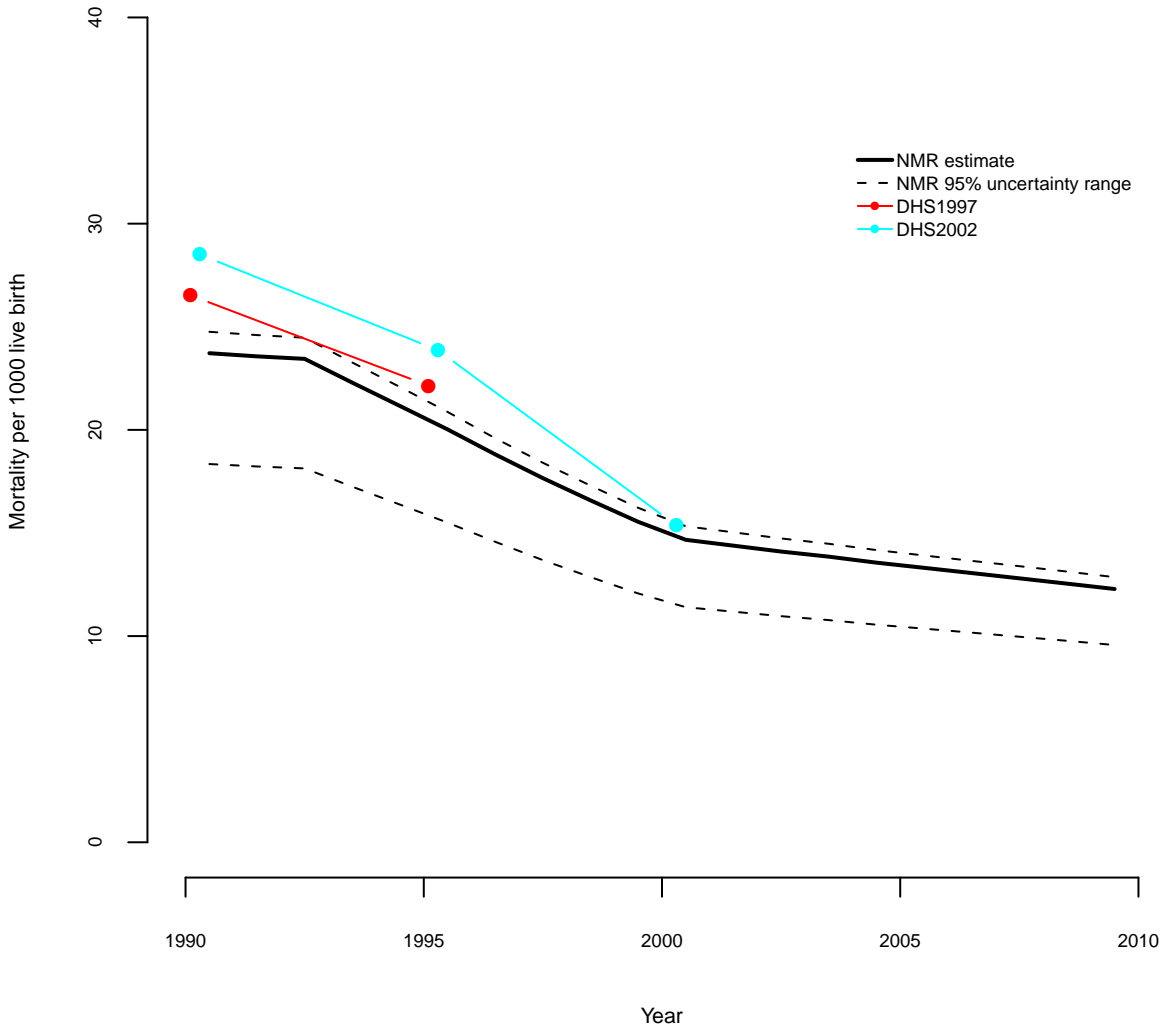

### Viet Nam NMR and U5MR

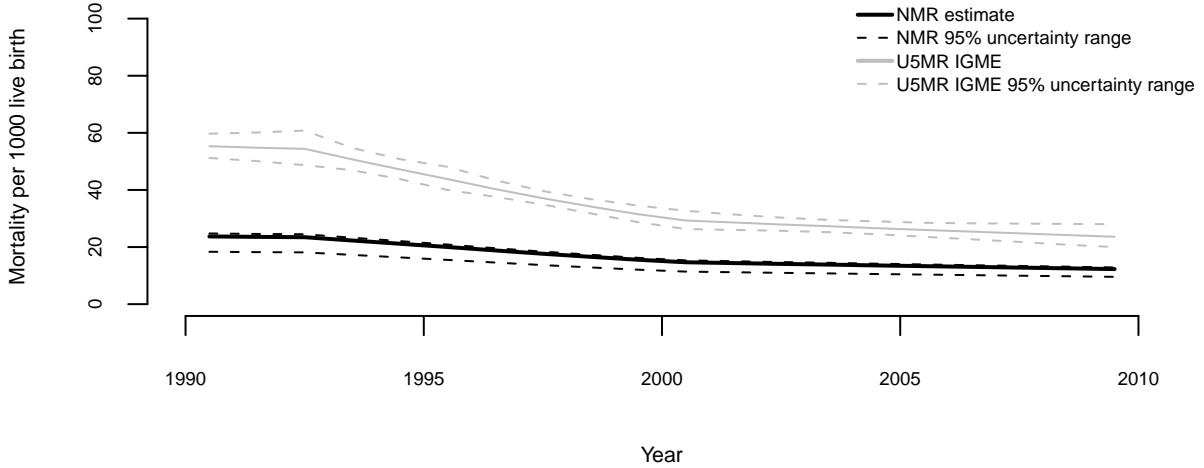

### Viet Nam NMR as percentage of U5MR

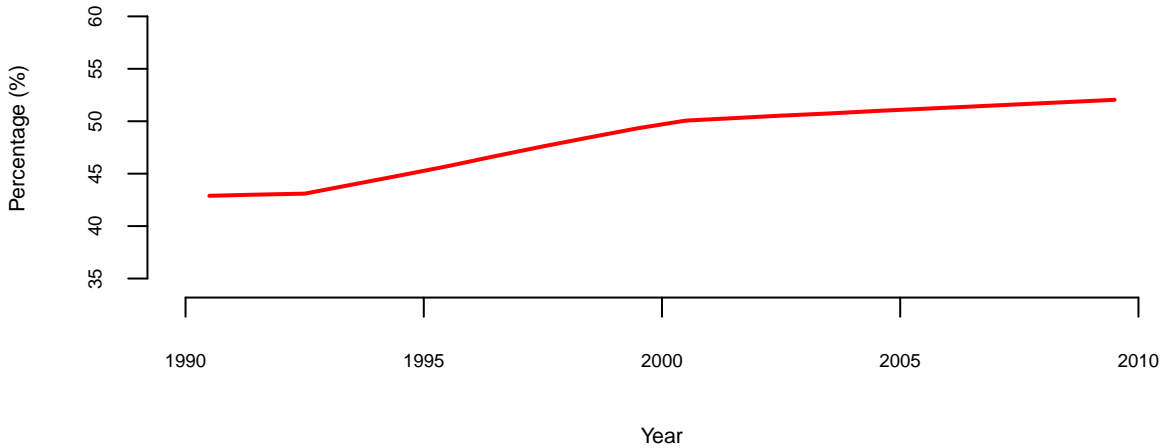

**Yemen**  
**Data, and estimated NMR**

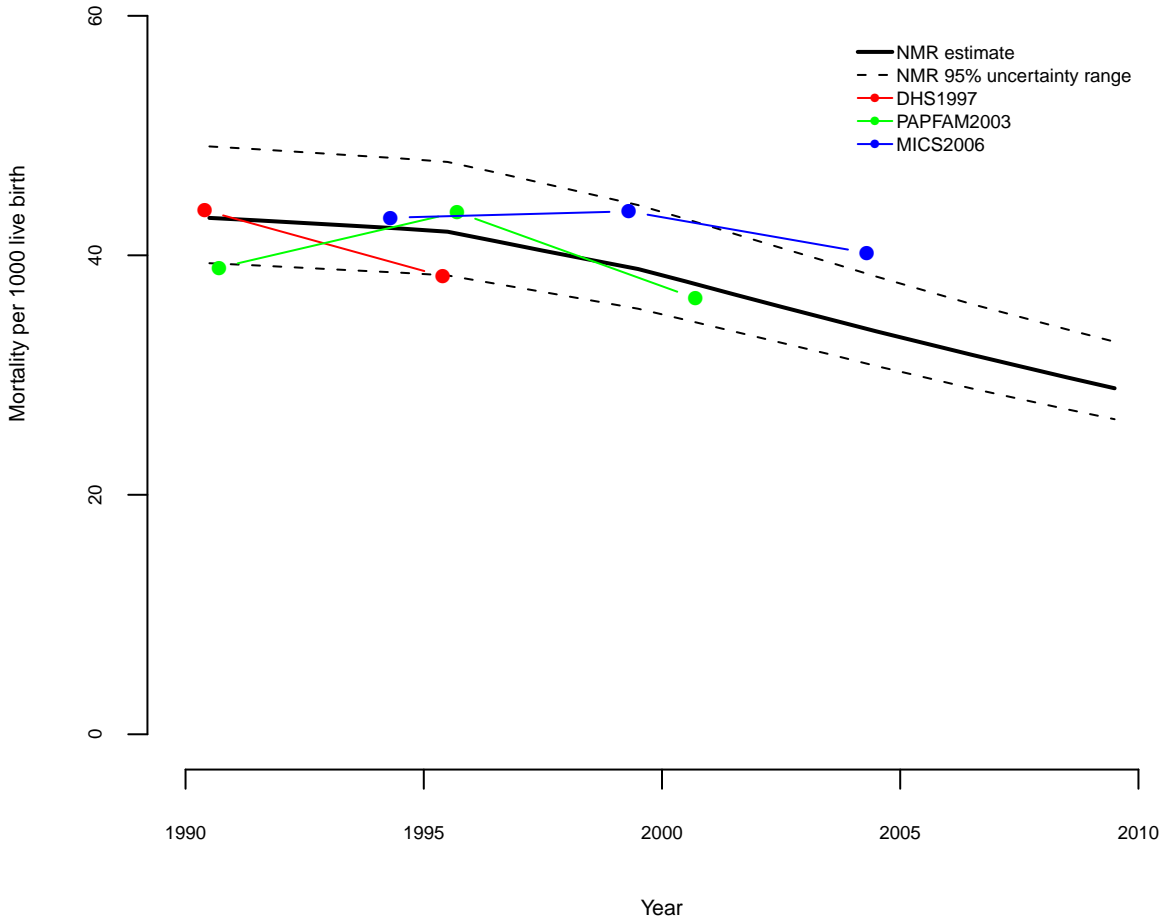

### Yemen NMR and U5MR

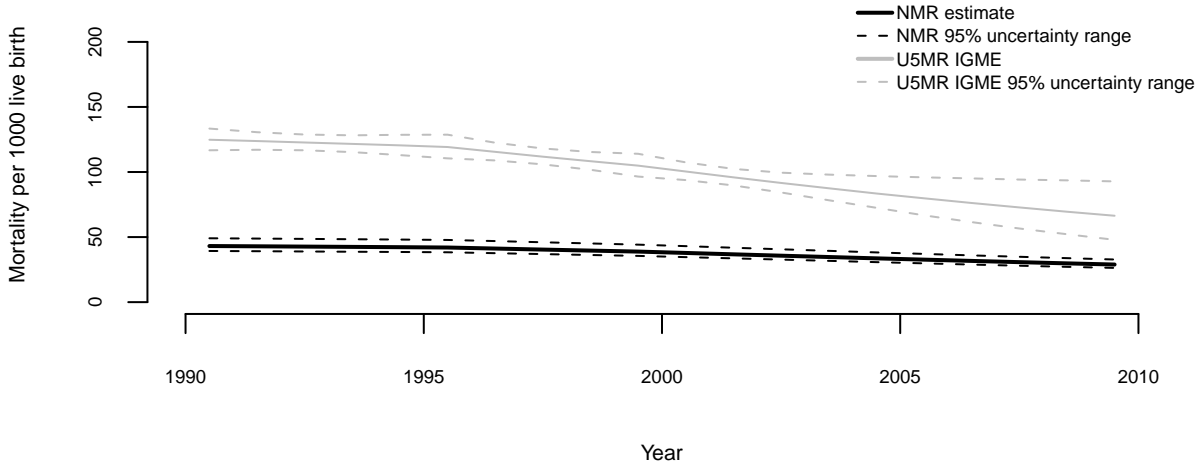

### Yemen NMR as percentage of U5MR

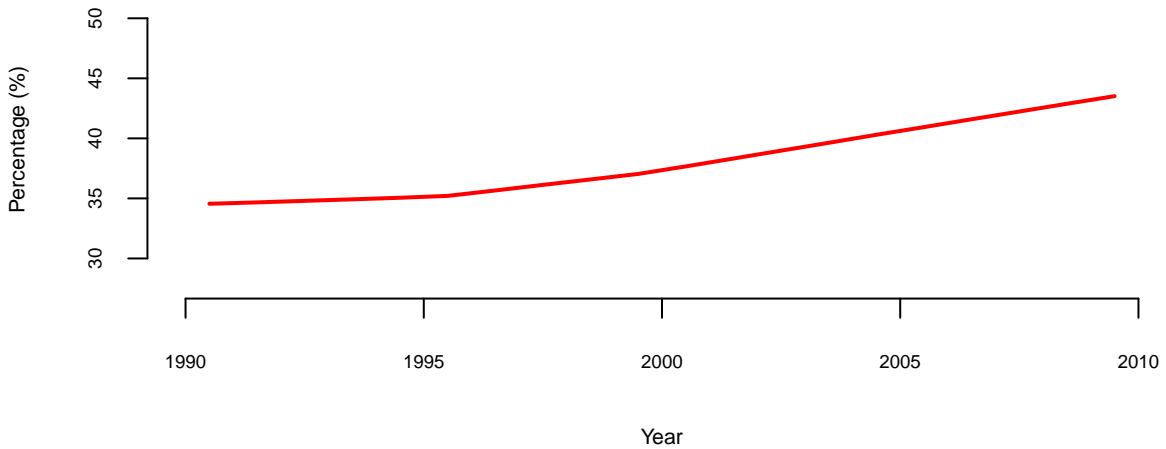

**Zambia**  
**Data, and estimated NMR**

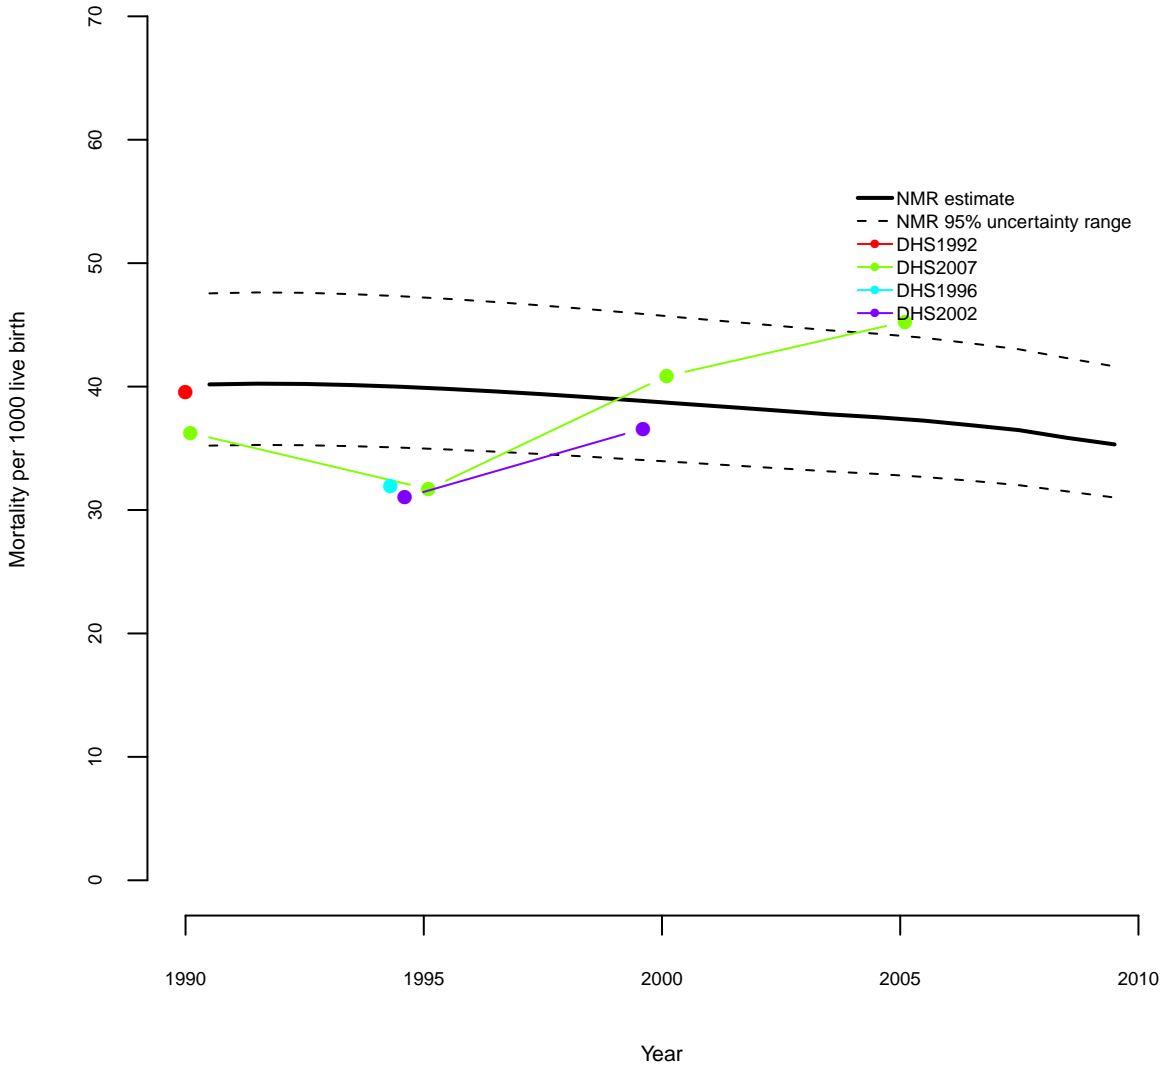

### Zambia NMR and U5MR

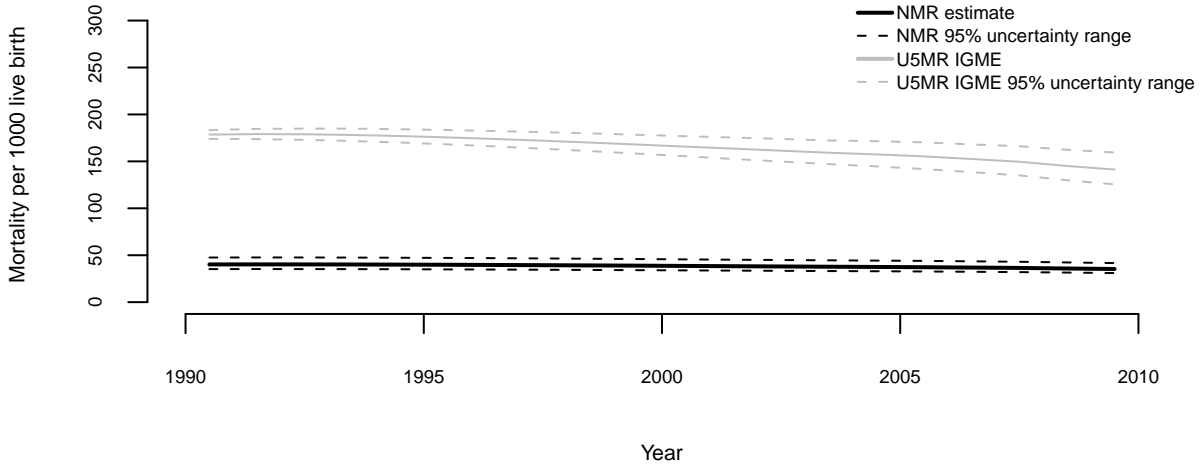

### Zambia NMR as percentage of U5MR

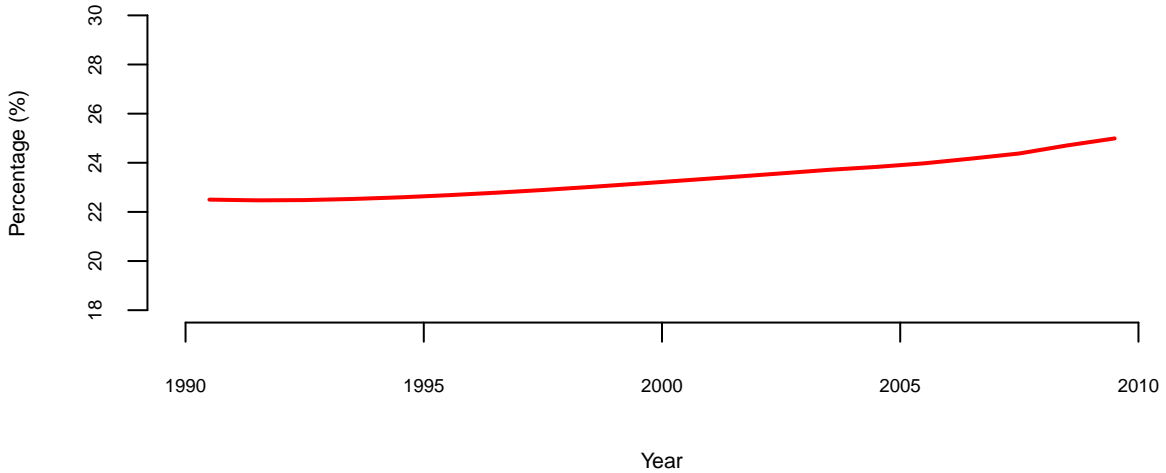



### Zimbabwe Data, and estimated NMR

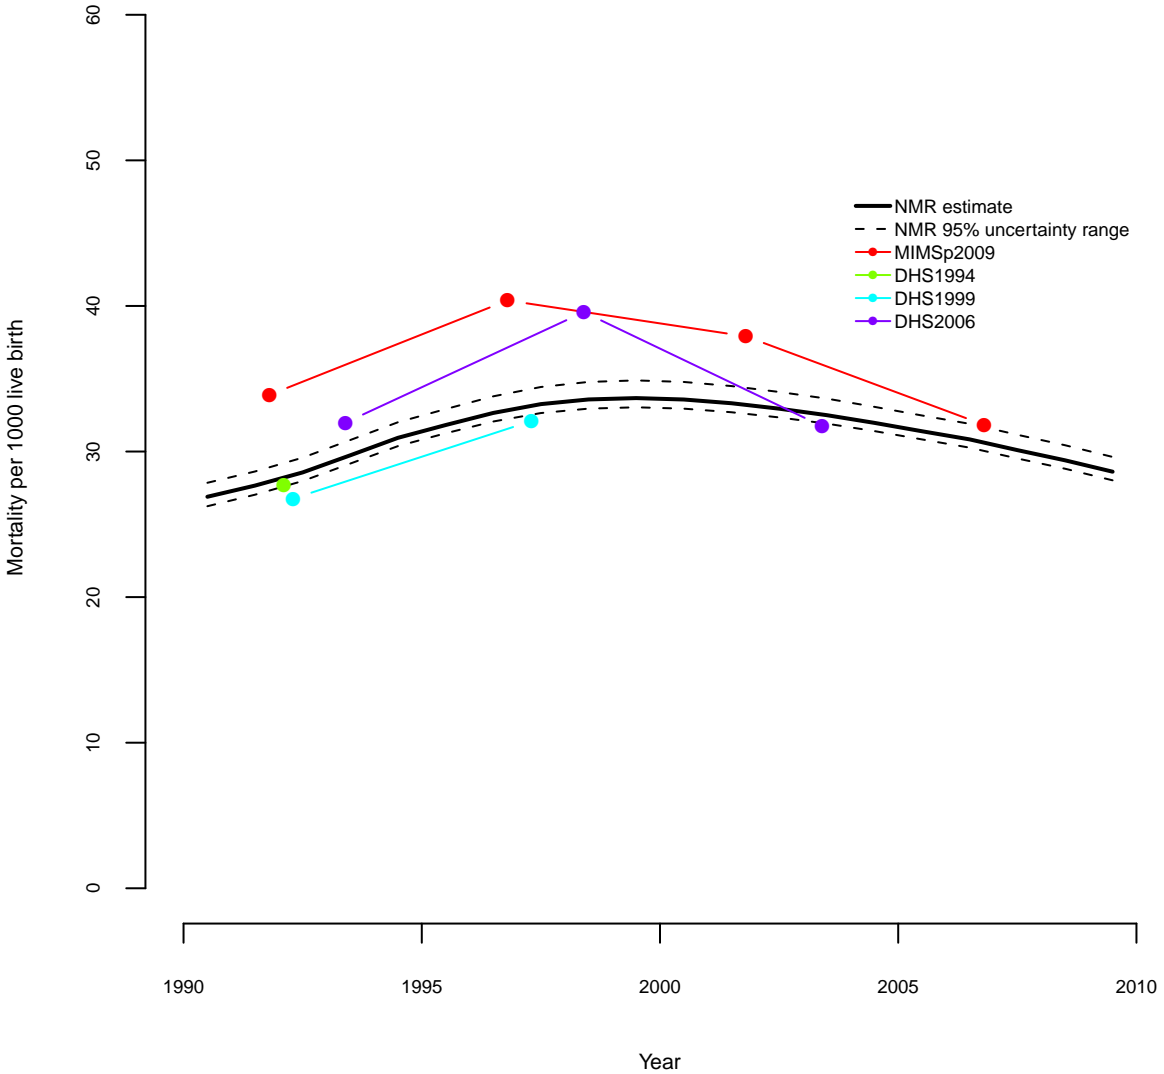

### Zimbabwe NMR and U5MR

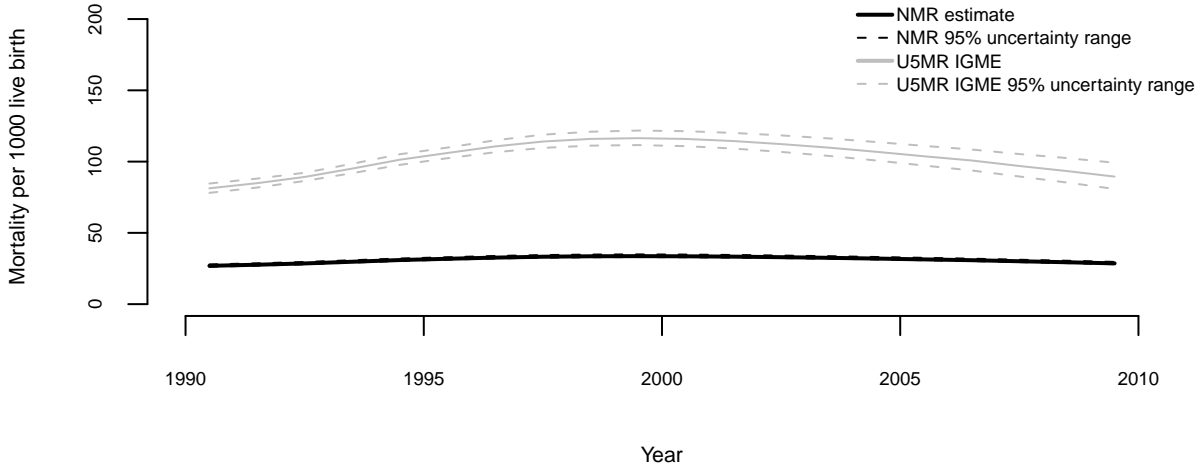

### Zimbabwe NMR as percentage of U5MR

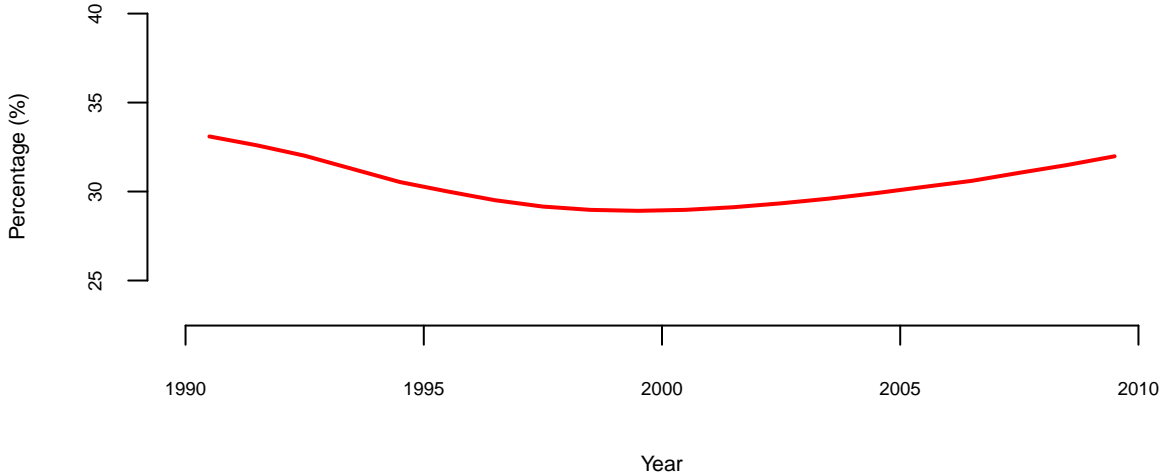

Supplement: pmed.1001080.s001.pdf [file pmed.1001080.s001.pdf]
