# Supplementary material
Source: PubMed Central journal article supplement (PMC3168874)

**Albania**  
**Paired t-test: p-value = 6.8e-12**

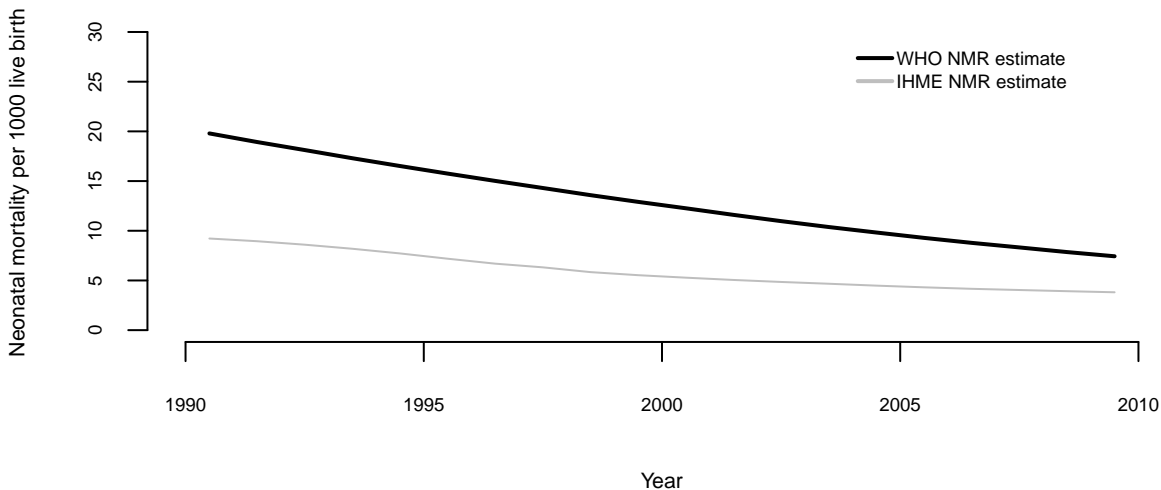

**Albania**  
**Percentage difference between WHO and IHME NMR estimates**

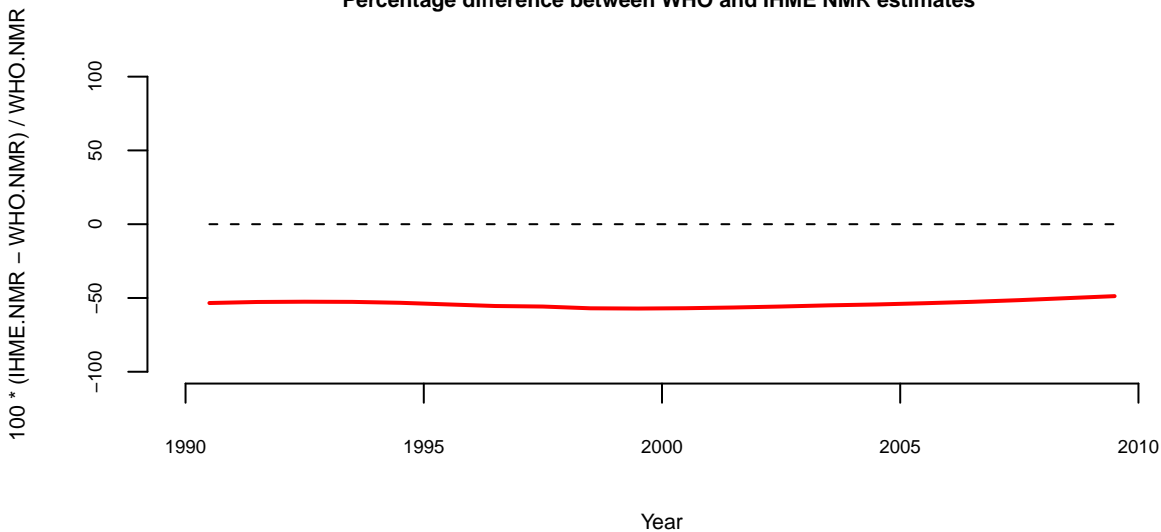

**Algeria**  
**Paired t-test: p-value = 2.2e-13**

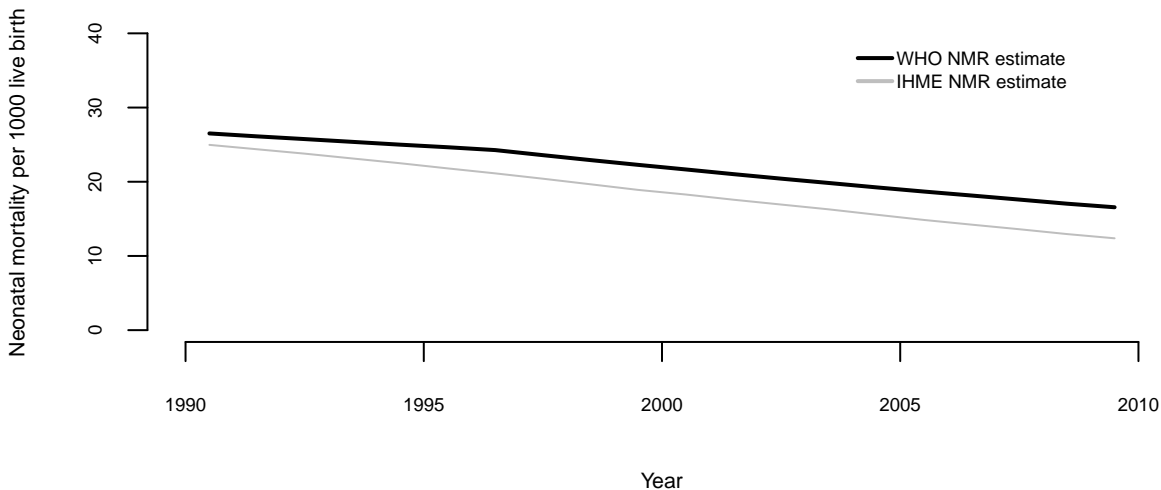

**Algeria**  
**Percentage difference between WHO and IHME NMR estimates**

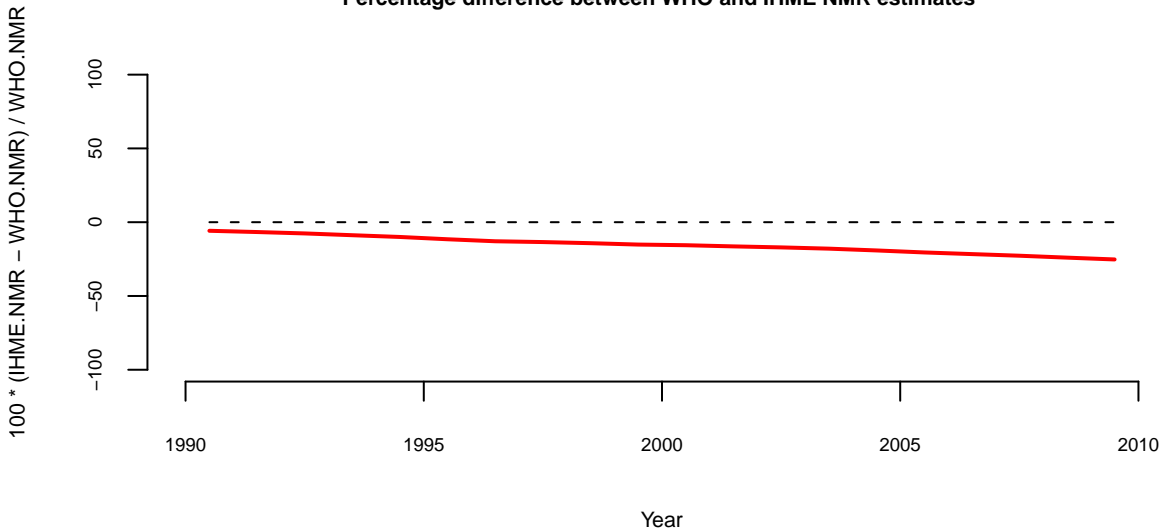

**Andorra**  
**Paired t-test: p-value = 7e-19**

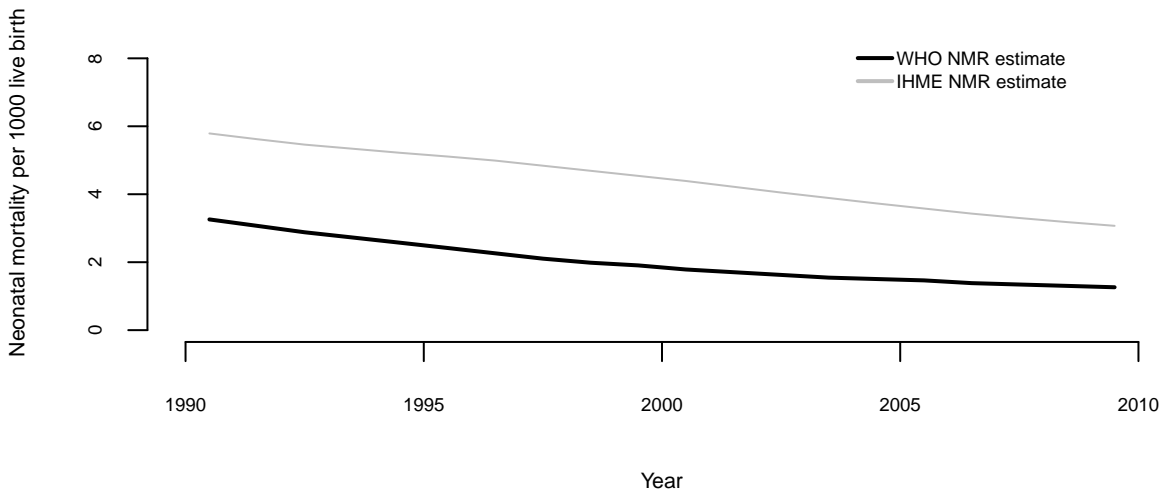

**Andorra**  
**Percentage difference between WHO and IHME NMR estimates**

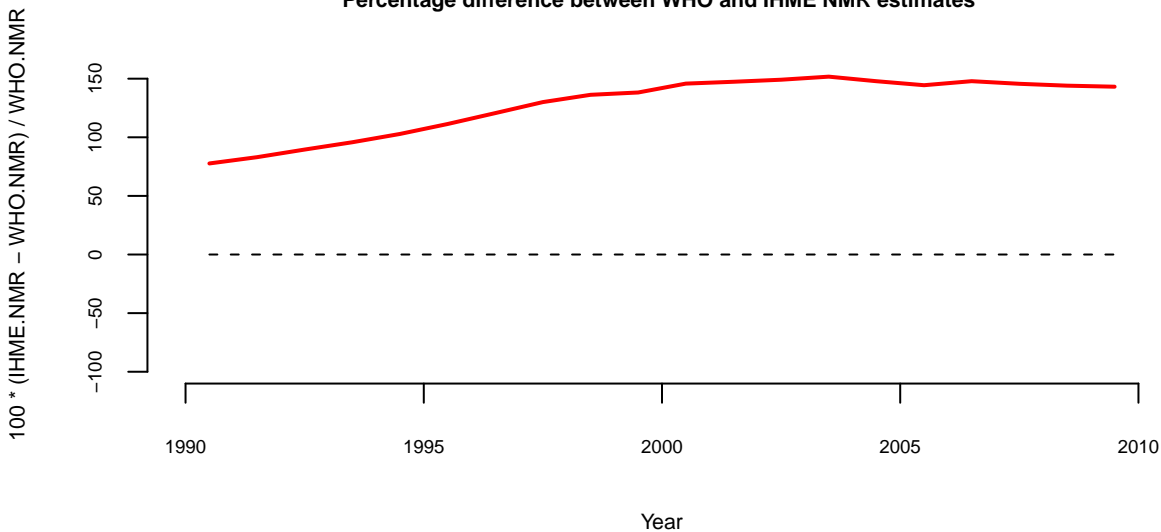

**Angola**  
**Paired t-test: p-value = 8.9e-10**

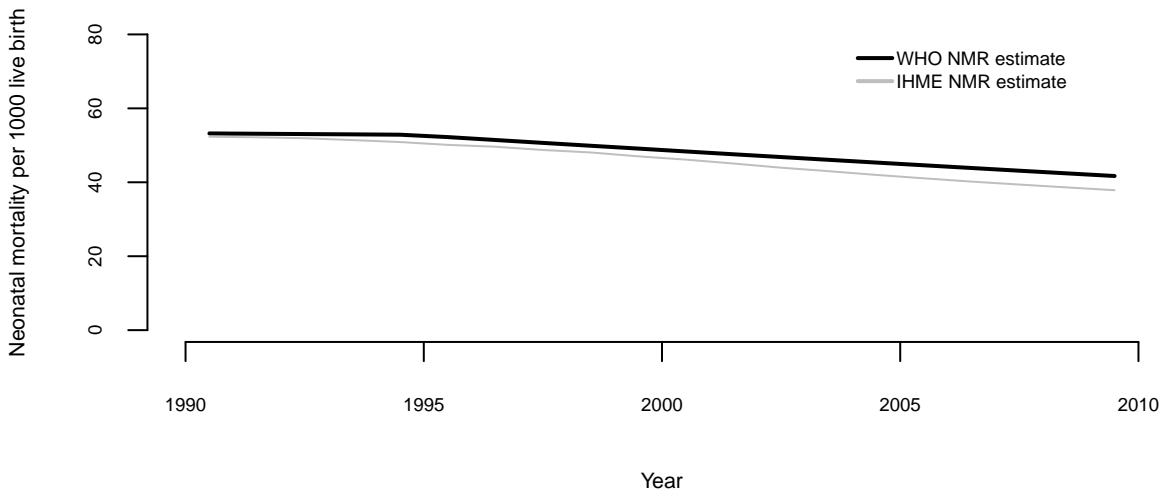

**Angola**  
**Percentage difference between WHO and IHME NMR estimates**

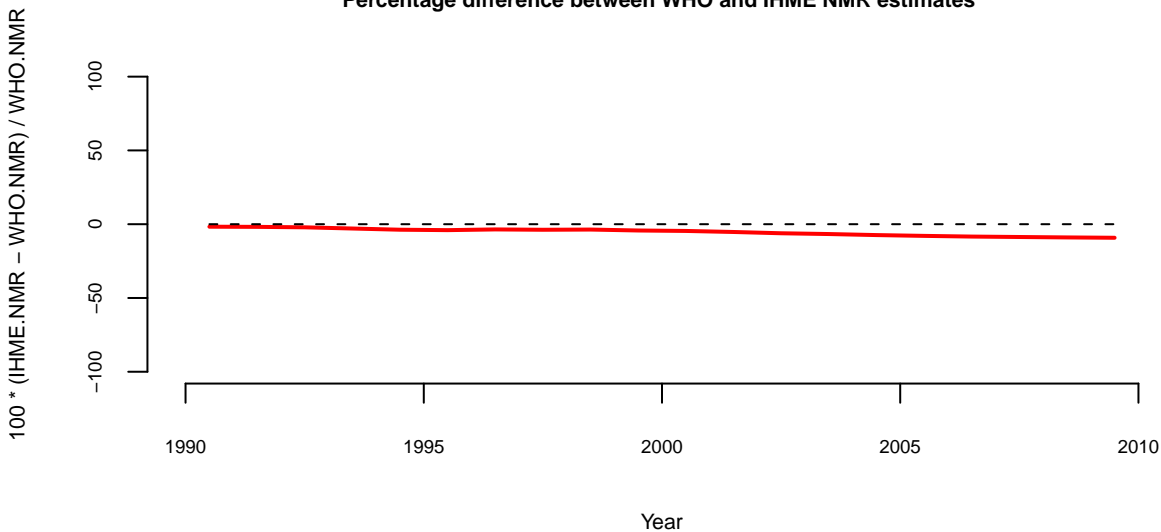

**Antigua and Barbuda**  
**Paired t-test: p-value = 1.6e-05**

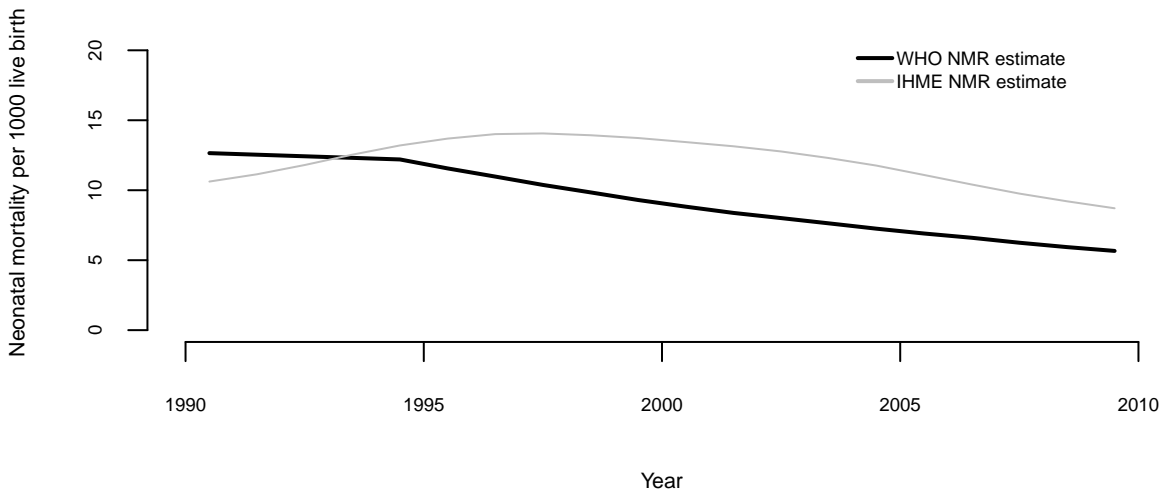

**Antigua and Barbuda**  
**Percentage difference between WHO and IHME NMR estimates**

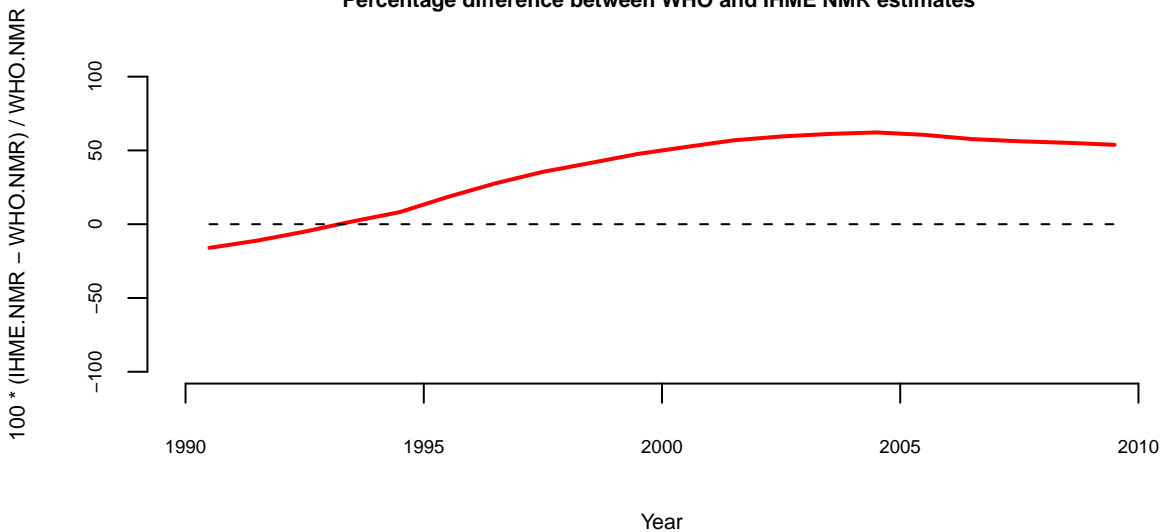

**Argentina**  
**Paired t-test: p-value = 4.5e-07**

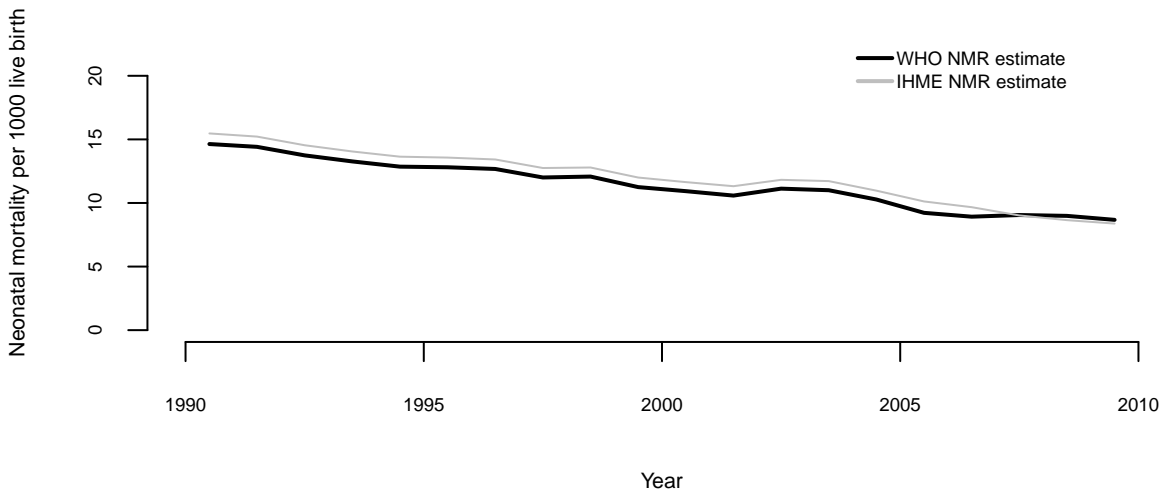

**Argentina**  
**Percentage difference between WHO and IHME NMR estimates**

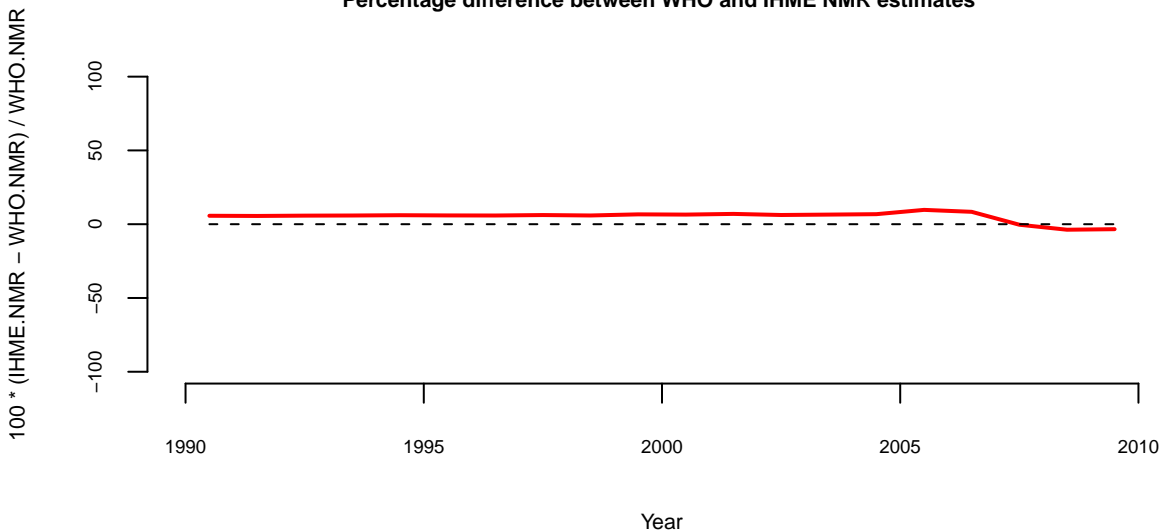

**Armenia**  
**Paired t-test: p-value = 1.8e-10**

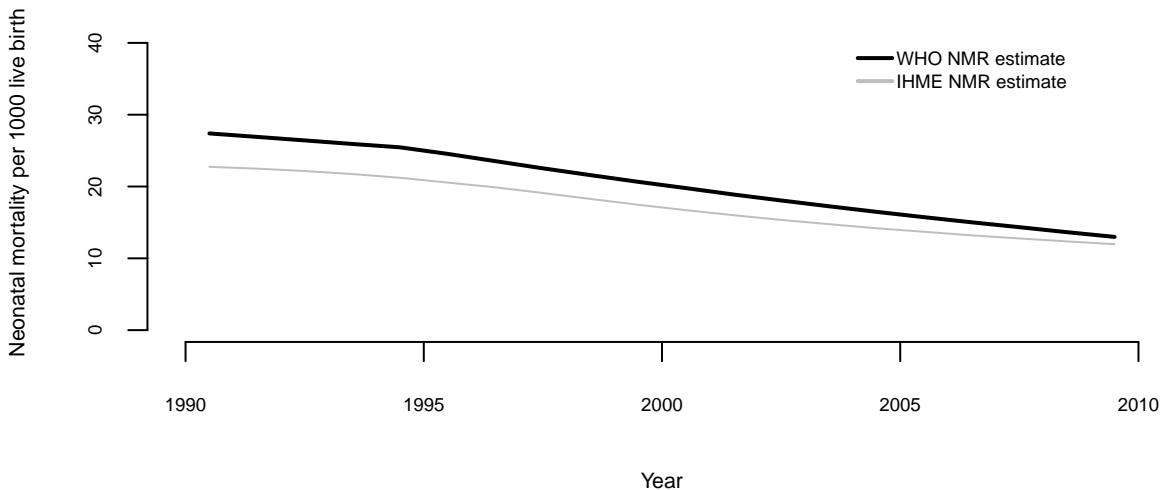

**Armenia**  
**Percentage difference between WHO and IHME NMR estimates**

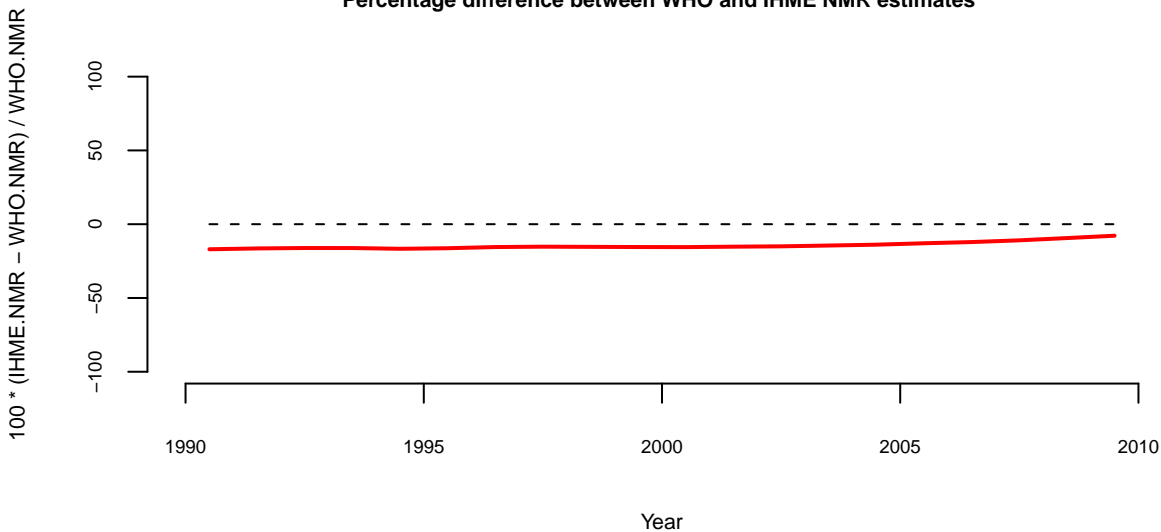

**Australia**  
**Paired t-test: p-value = 8e-05**

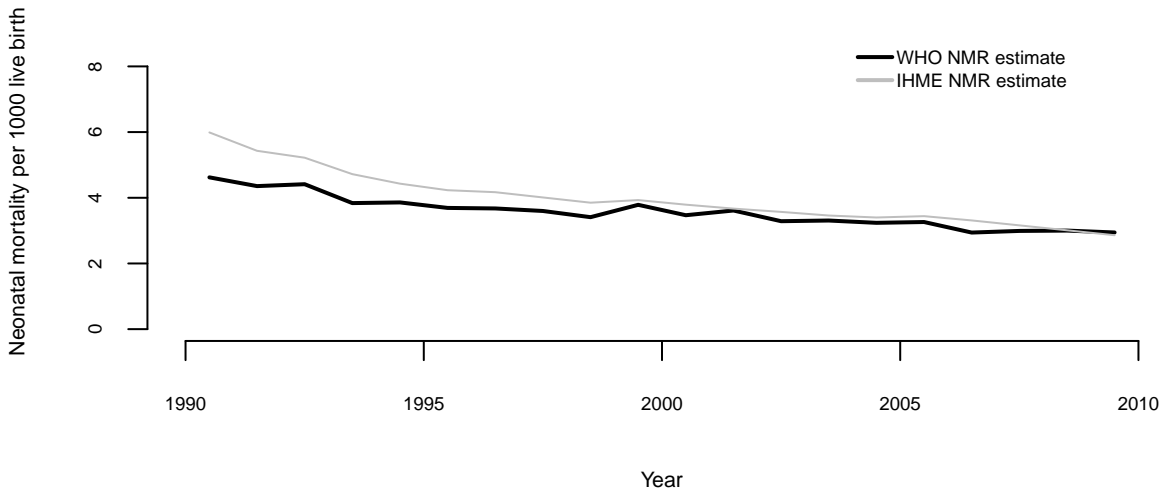

**Australia**  
**Percentage difference between WHO and IHME NMR estimates**

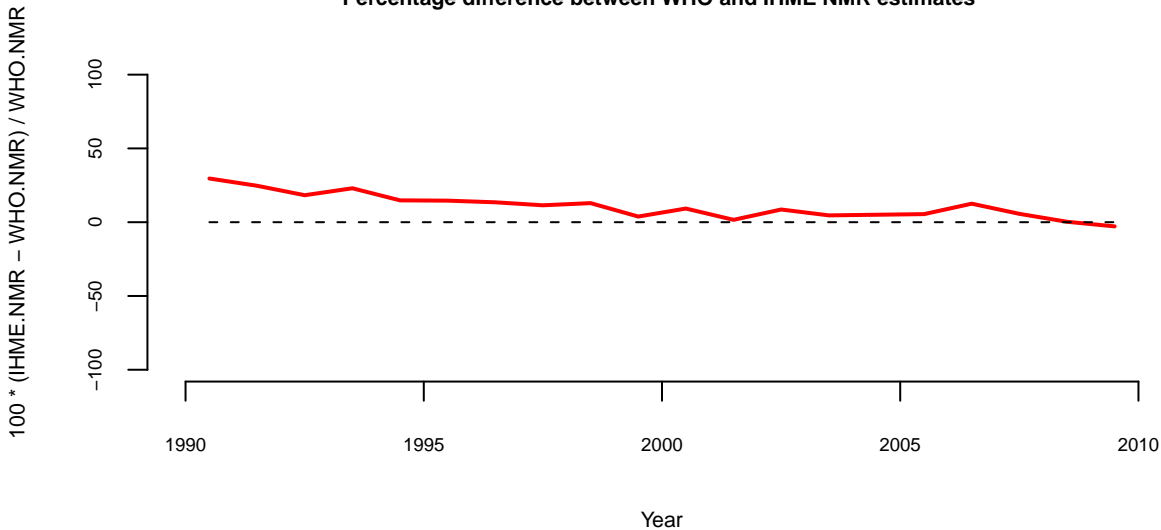

**Austria**  
**Paired t-test: p-value = 0.0032**

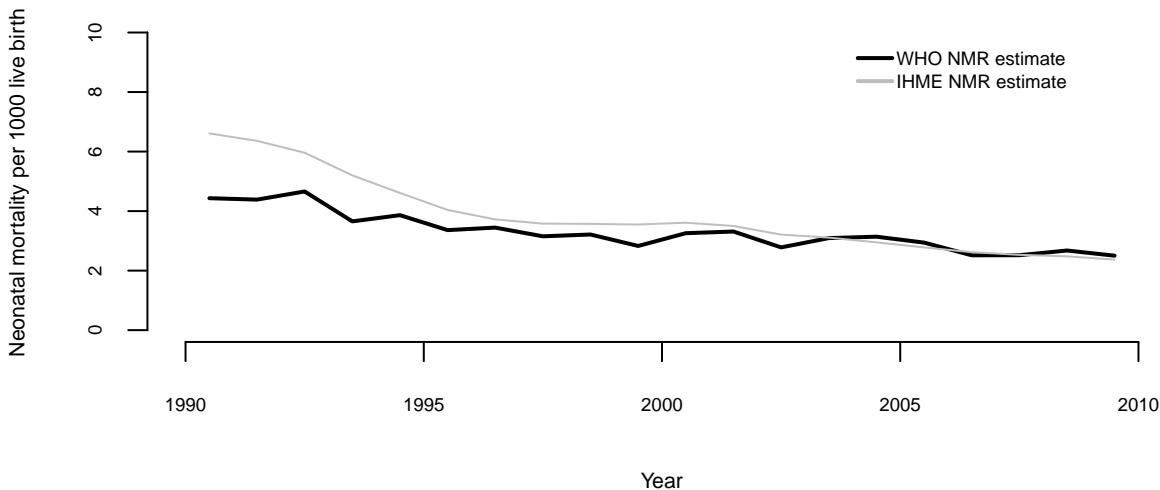

**Austria**  
**Percentage difference between WHO and IHME NMR estimates**

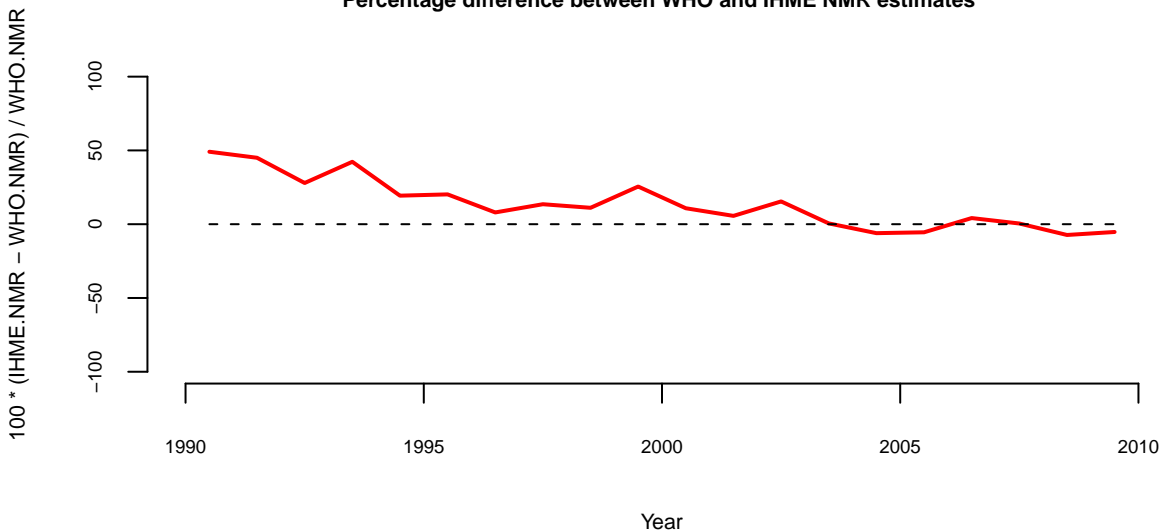

**Azerbaijan**  
**Paired t-test: p-value = 0.69**

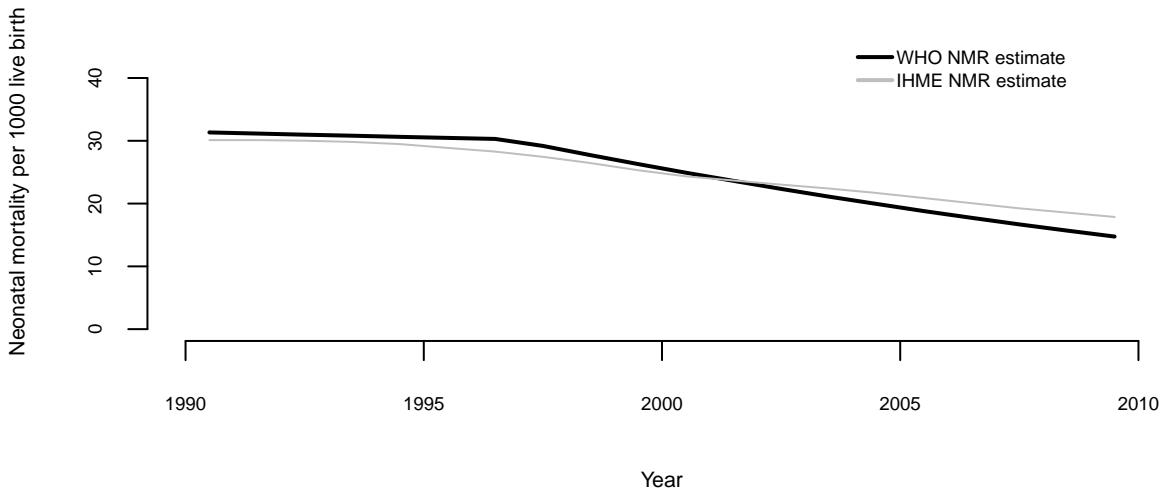

**Azerbaijan**  
**Percentage difference between WHO and IHME NMR estimates**

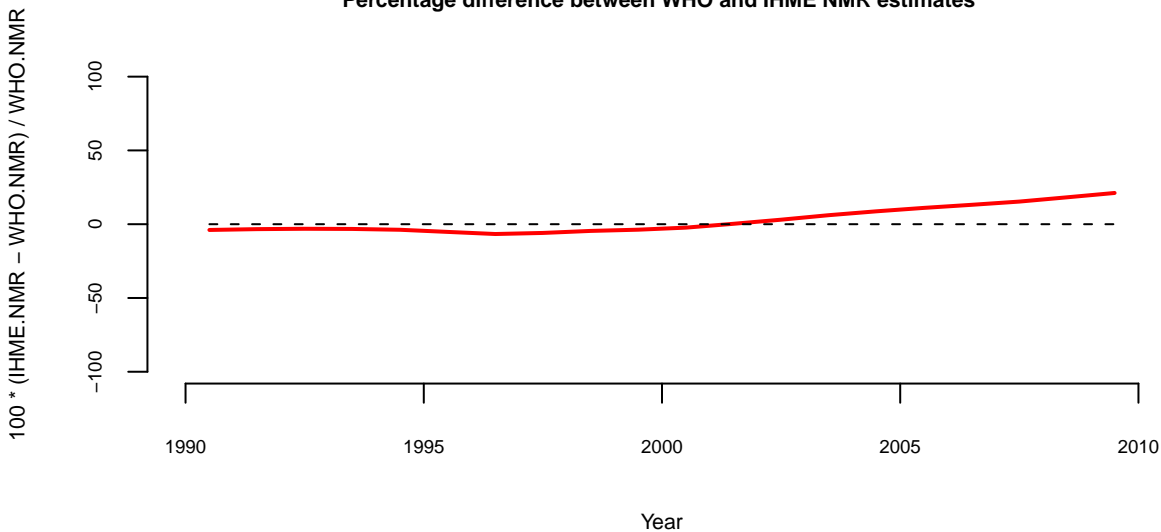

**Bahamas**  
Paired t-test: p-value =  $1.8e-08$

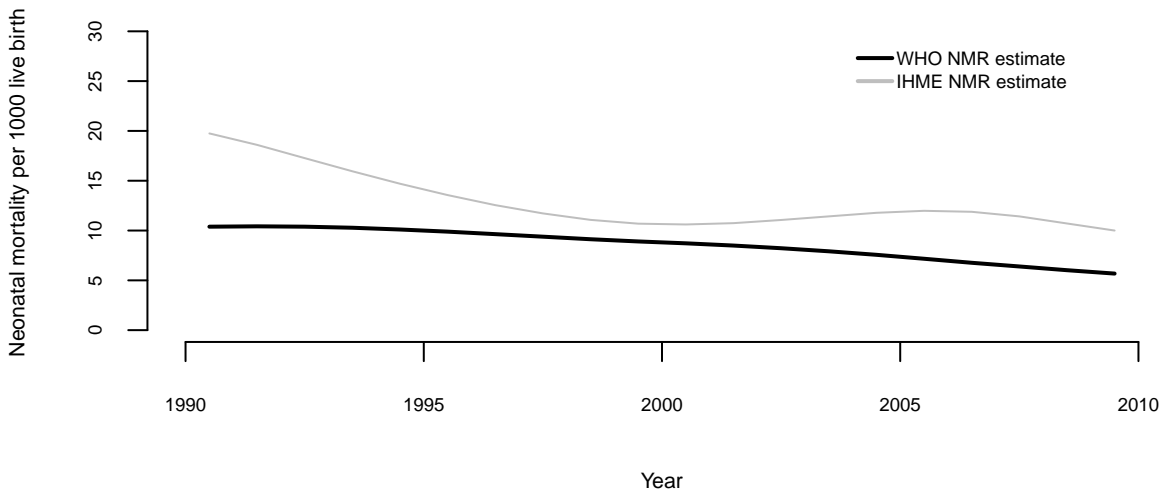

**Bahamas**  
Percentage difference between WHO and IHME NMR estimates

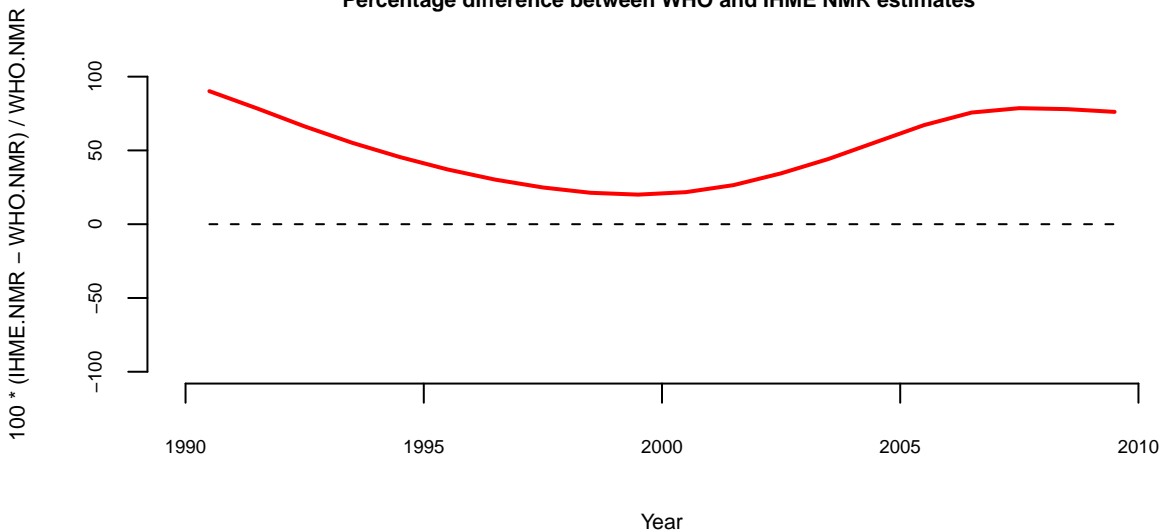

**Bahrain**  
**Paired t-test: p-value = 0.0051**

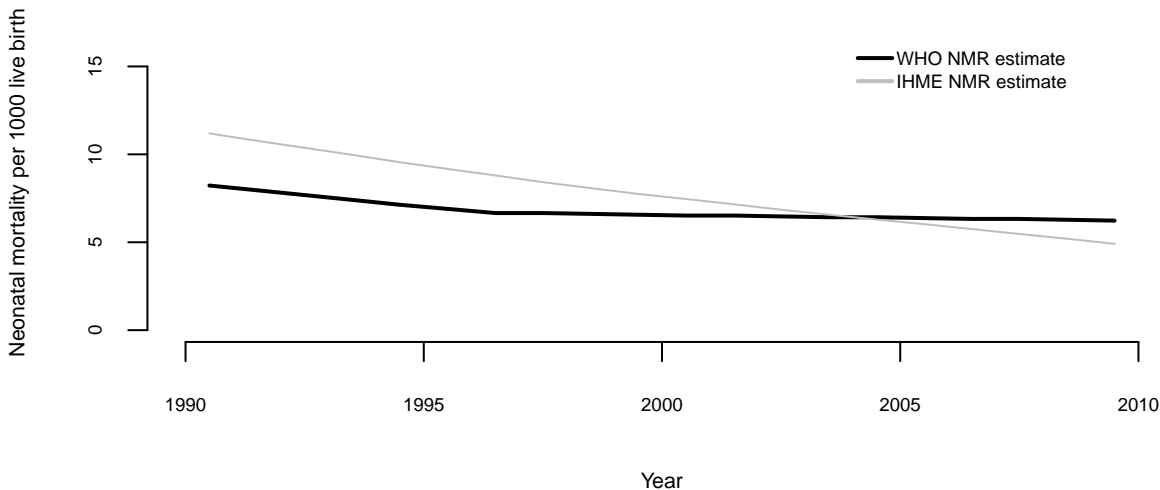

**Bahrain**  
**Percentage difference between WHO and IHME NMR estimates**

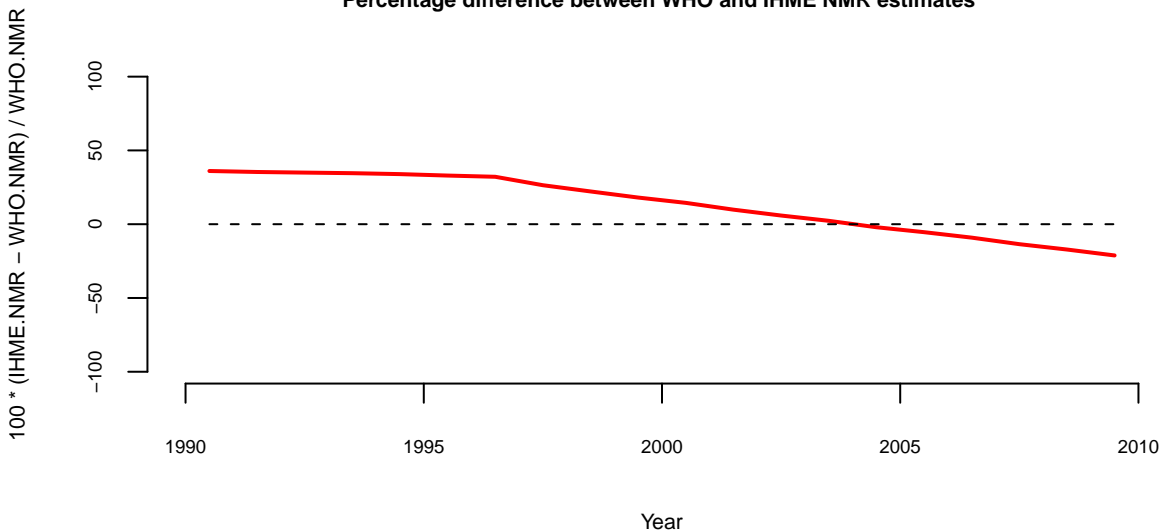

**Bangladesh**  
**Paired t-test: p-value = 5.8e-09**

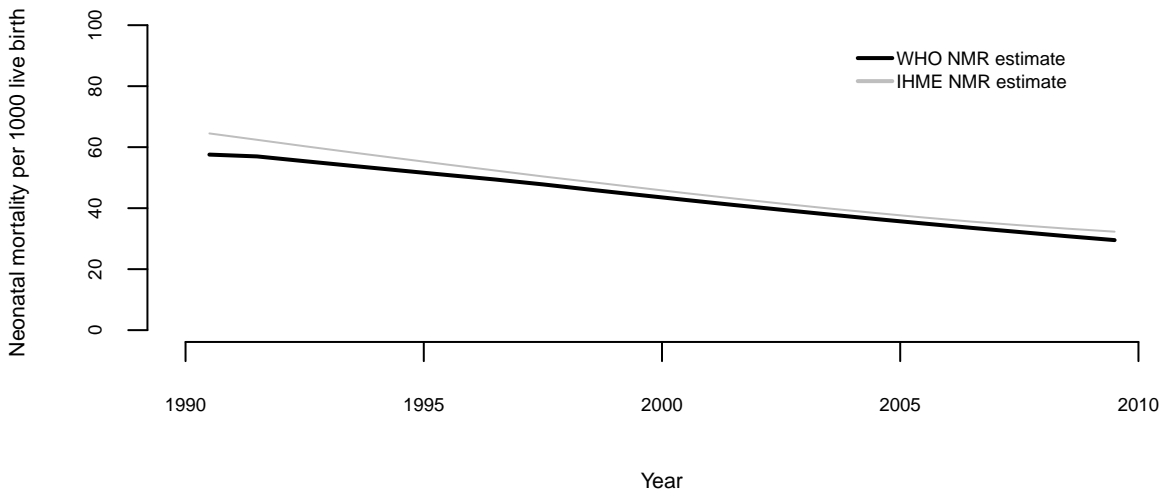

**Bangladesh**  
**Percentage difference between WHO and IHME NMR estimates**

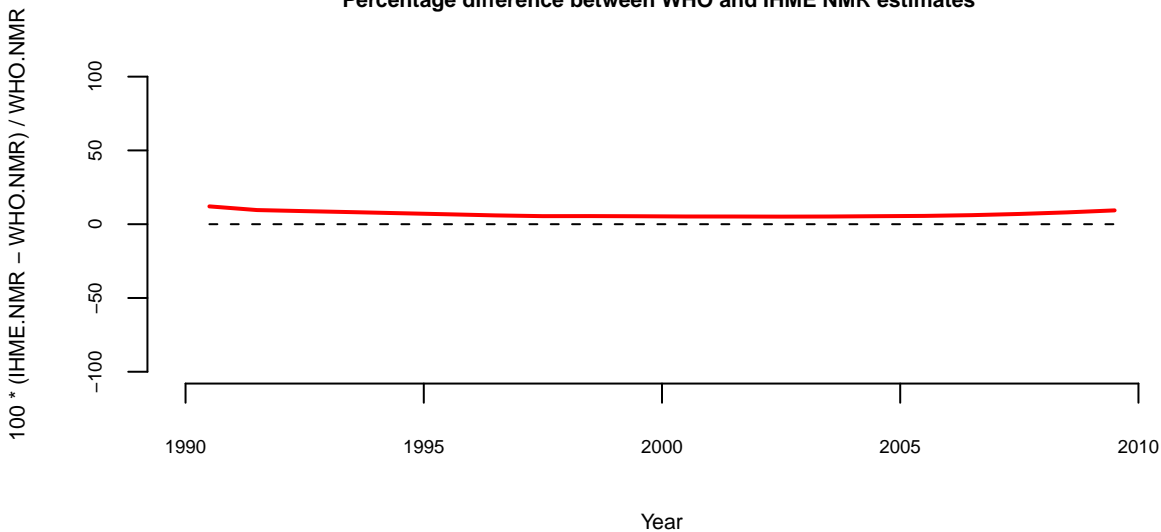

**Barbados**  
**Paired t-test: p-value = 2.6e-09**

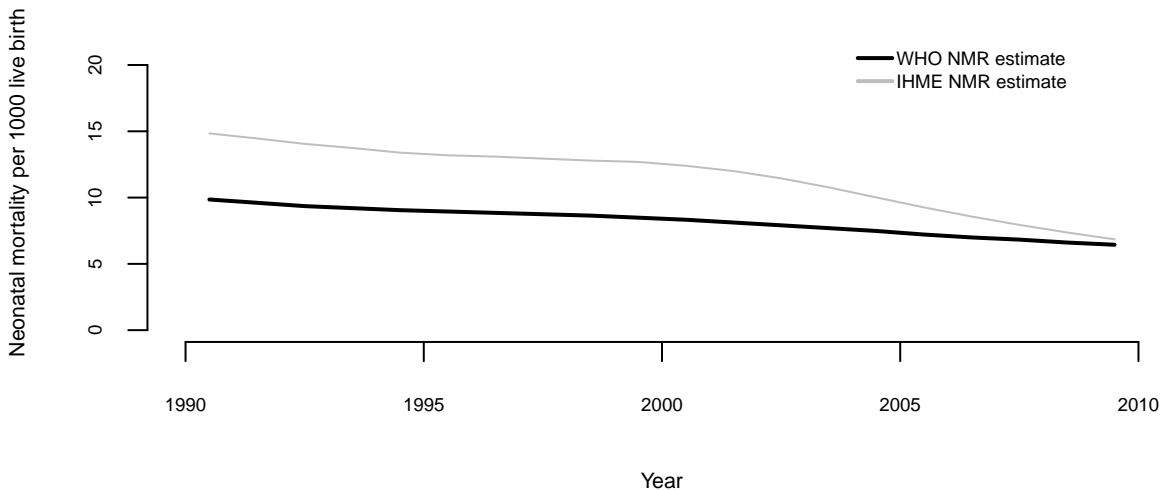

**Barbados**  
**Percentage difference between WHO and IHME NMR estimates**

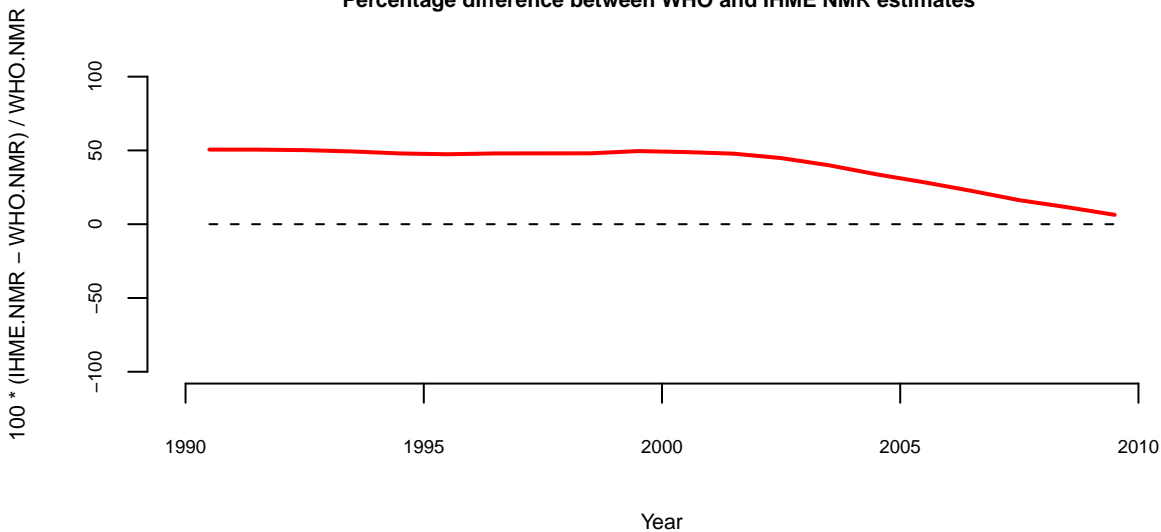

**Belarus**  
**Paired t-test: p-value = 1.4e-08**

Neonatal mortality per 1000 live birth

— WHO NMR estimate  
— IHME NMR estimate

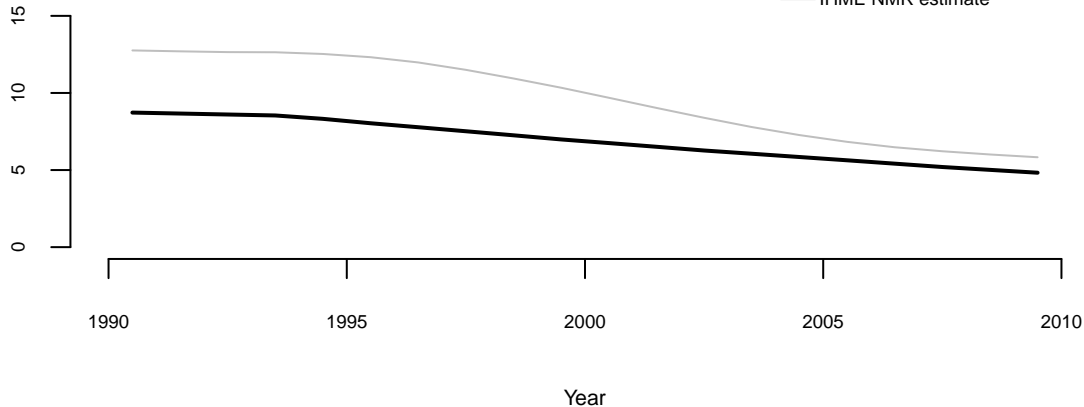

**Belarus**  
**Percentage difference between WHO and IHME NMR estimates**

$100 * (\text{IHME.NMR} - \text{WHO.NMR}) / \text{WHO.NMR}$

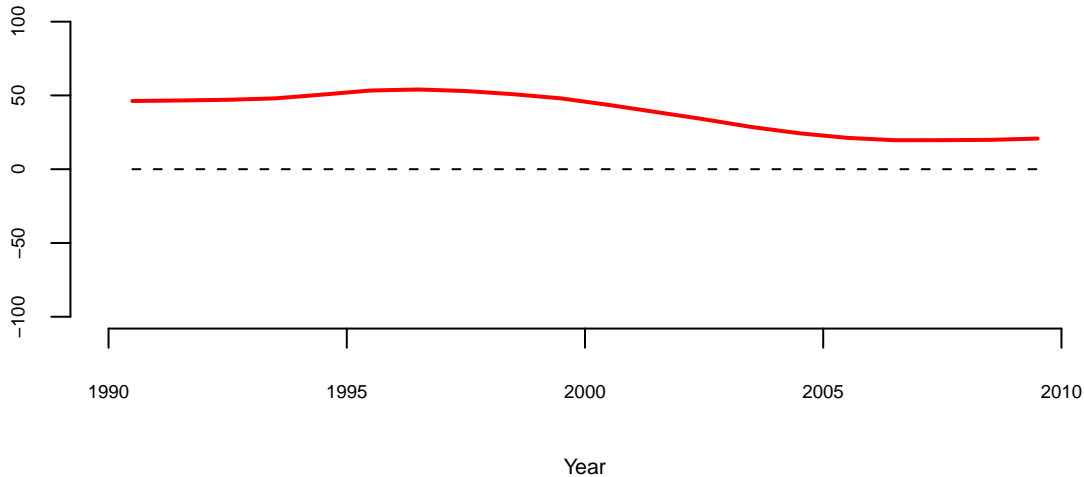

**Belgium**  
Paired t-test: p-value = 2.1e-05

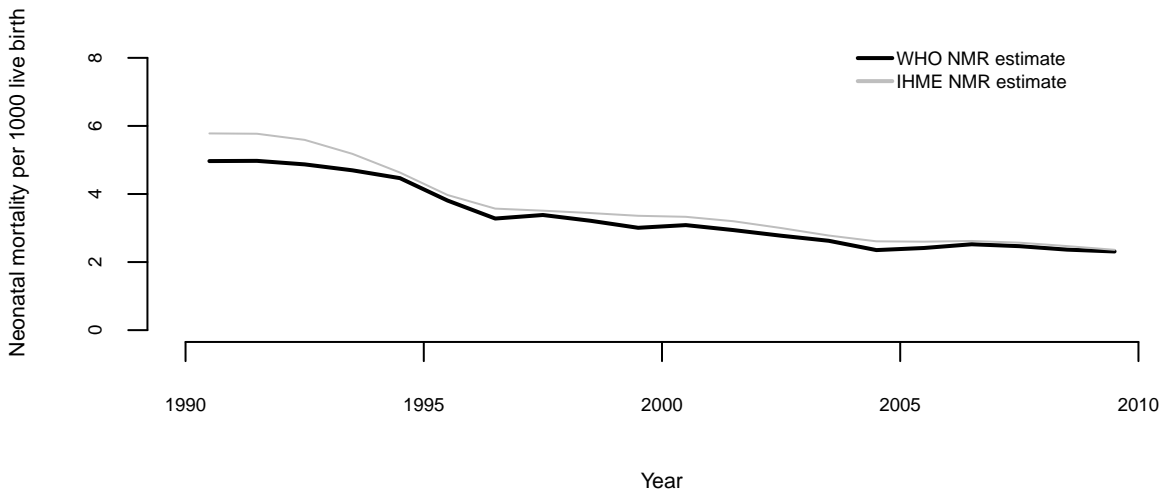

**Belgium**  
Percentage difference between WHO and IHME NMR estimates

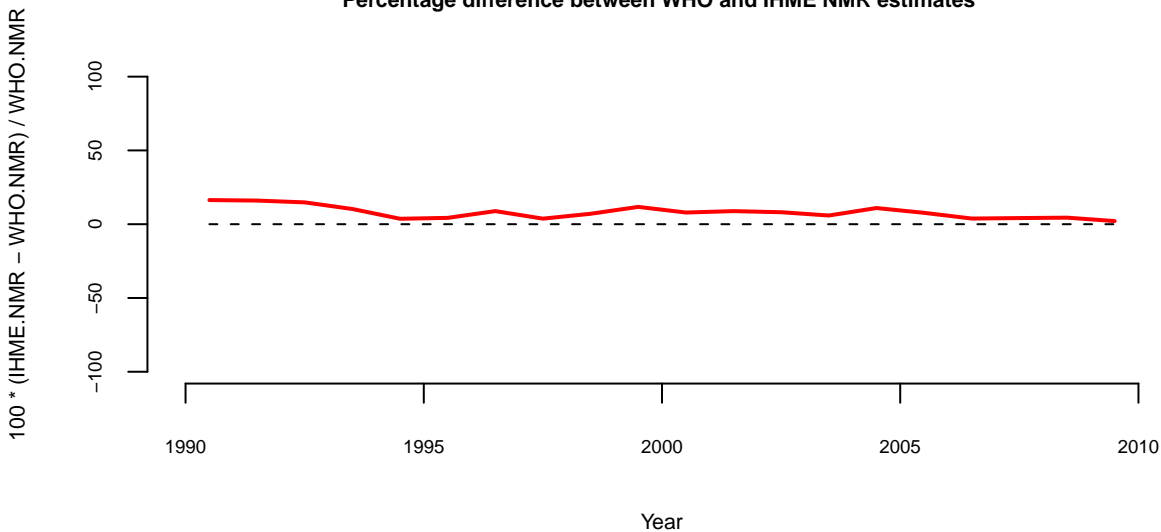

**Belize**  
**Paired t-test: p-value = 2.7e-21**

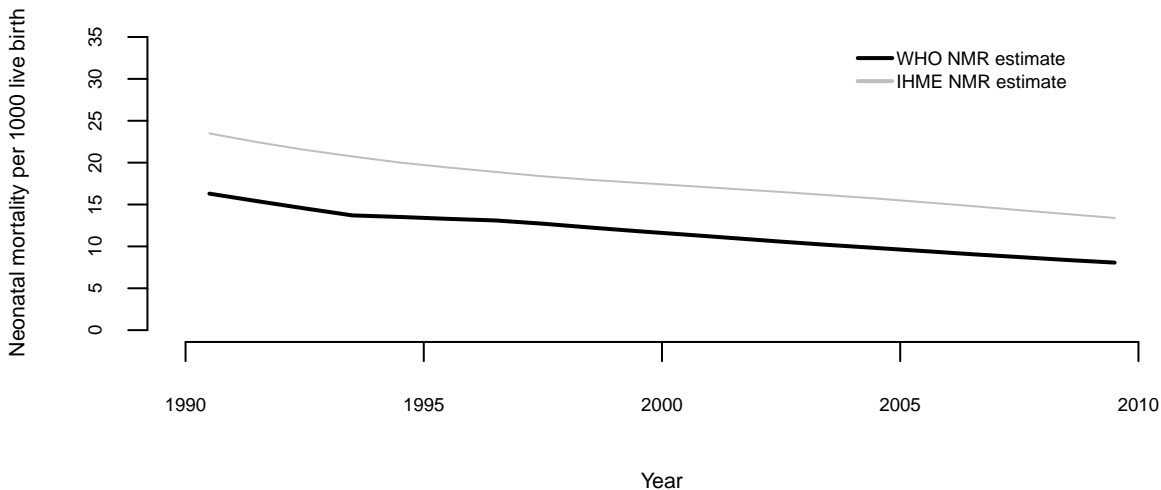

**Belize**  
**Percentage difference between WHO and IHME NMR estimates**

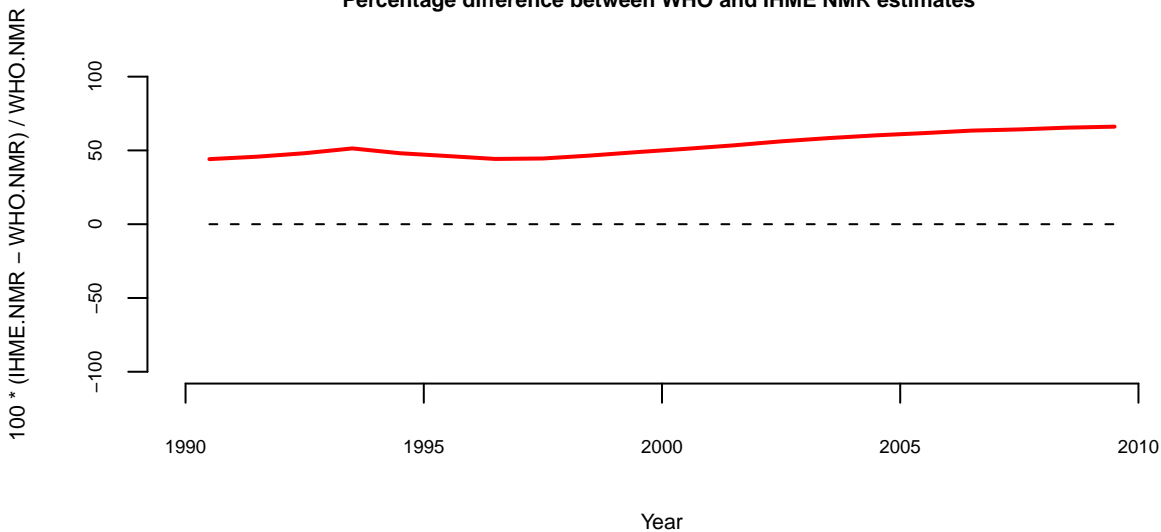

**Benin**  
**Paired t-test: p-value = 0.077**

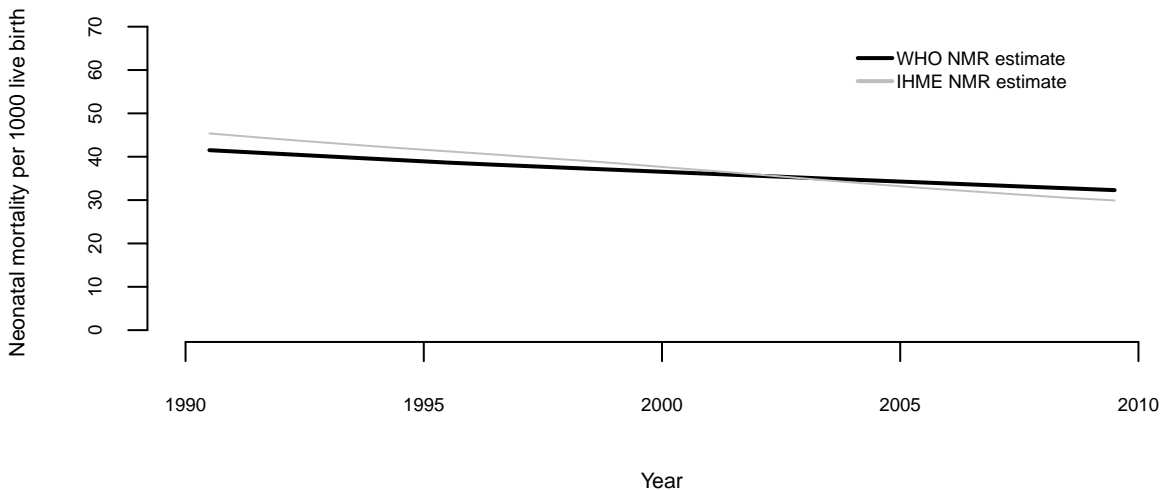

**Benin**  
**Percentage difference between WHO and IHME NMR estimates**

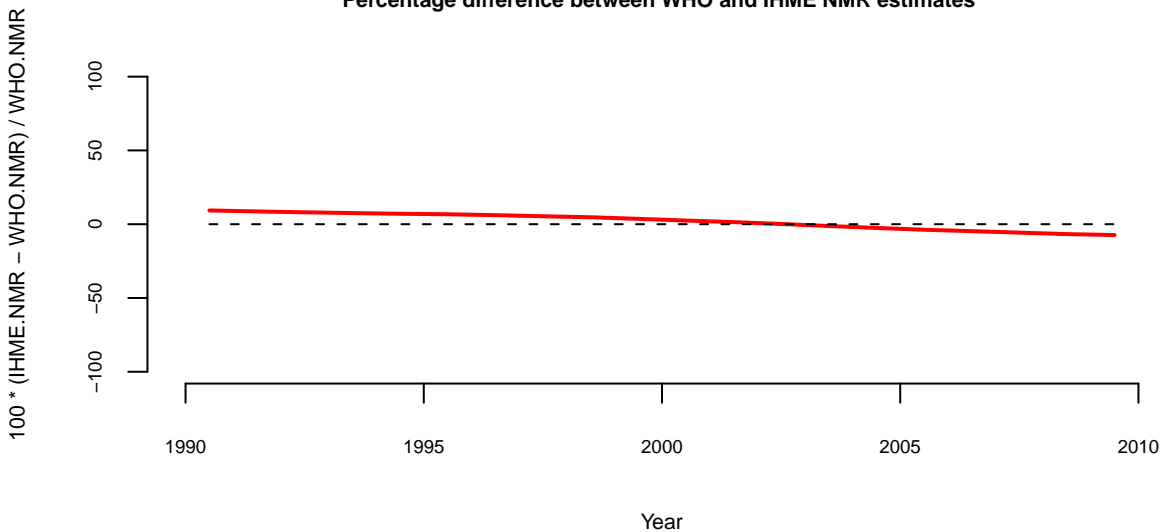

**Bhutan**  
**Paired t-test: p-value = 0.00084**

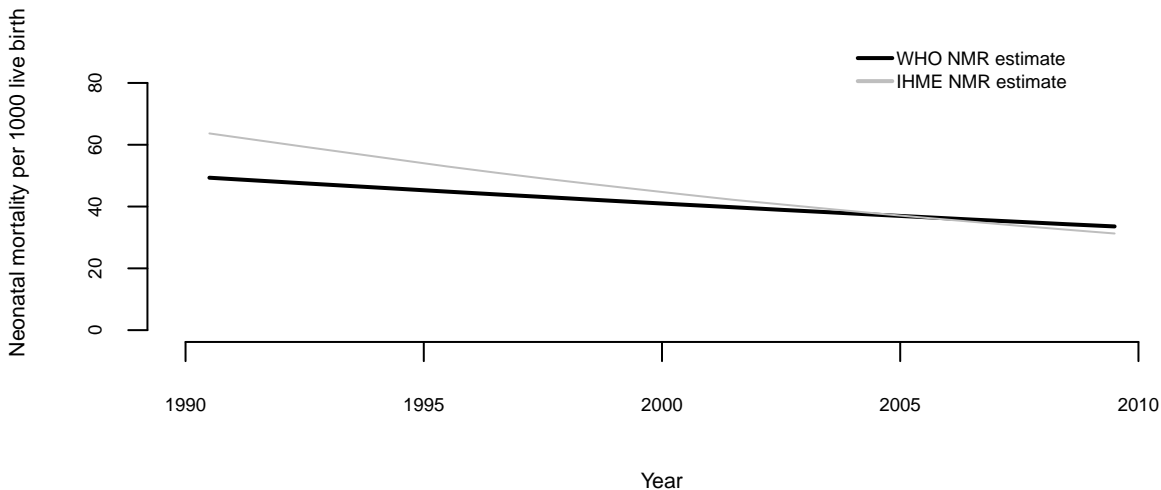

**Bhutan**  
**Percentage difference between WHO and IHME NMR estimates**

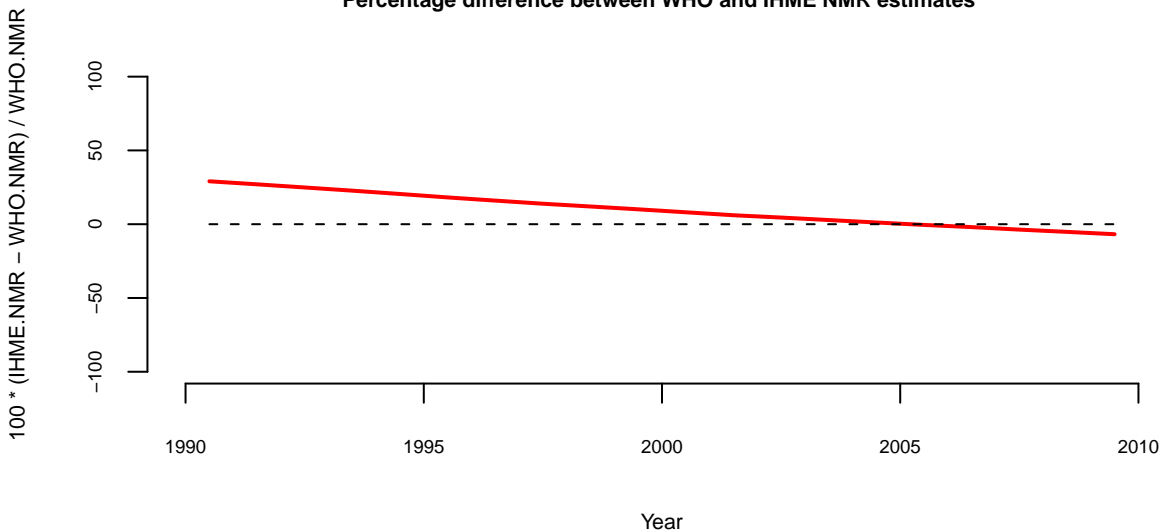

**Bolivia**  
**Paired t-test: p-value = 2.7e-11**

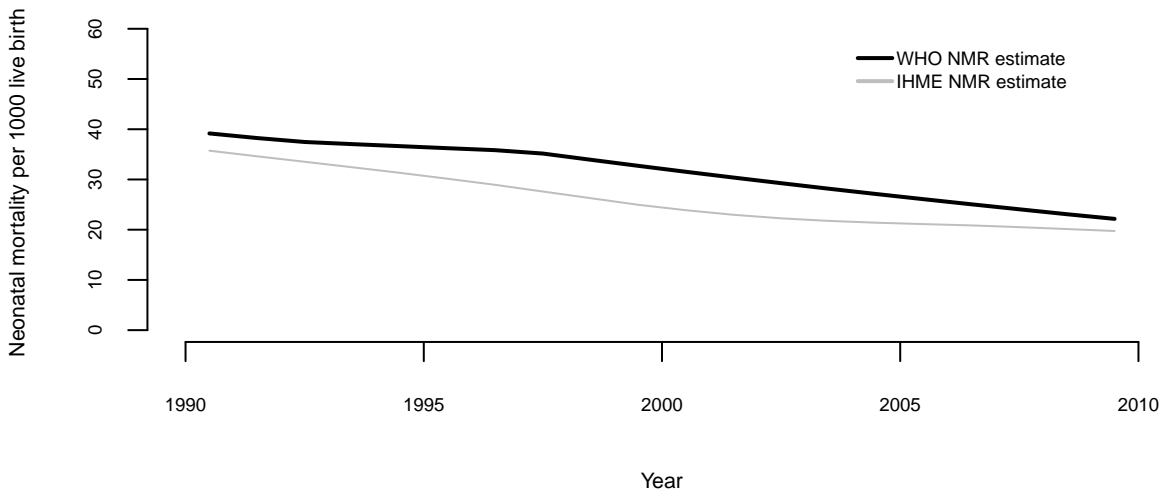

**Bolivia**  
**Percentage difference between WHO and IHME NMR estimates**

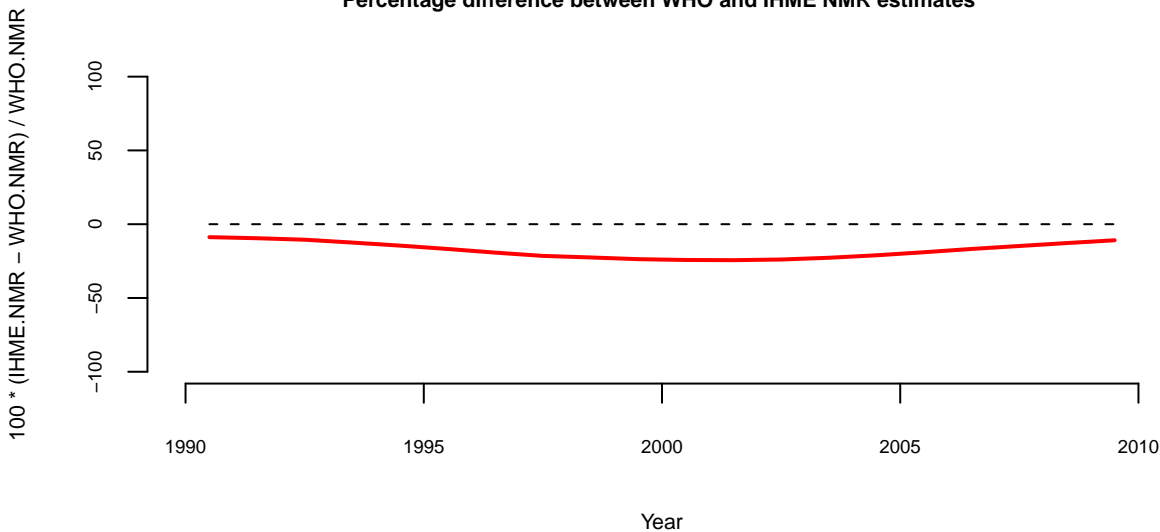

**Bosnia and Herzegovina**  
Paired t-test: p-value =  $3.6e-24$

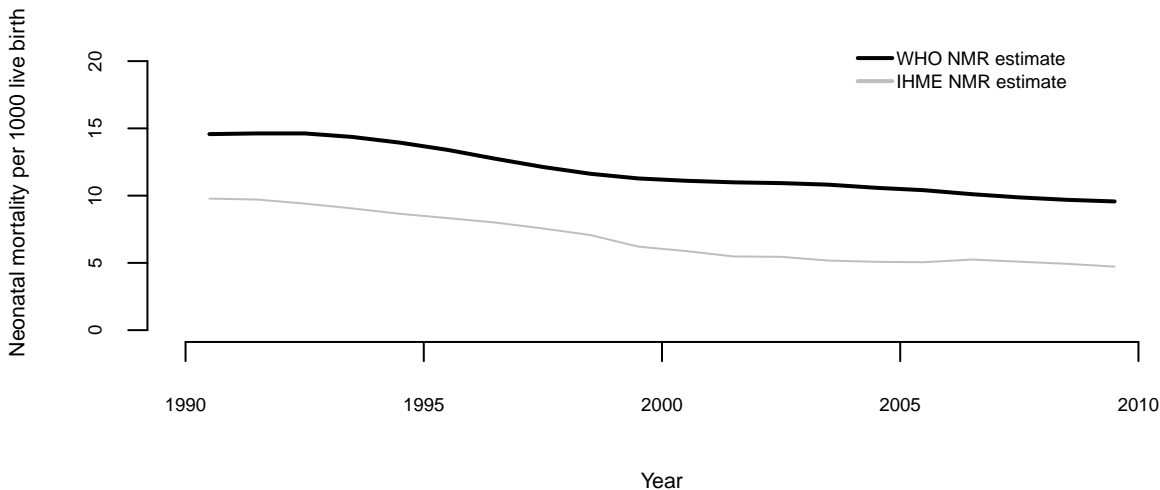

**Bosnia and Herzegovina**  
Percentage difference between WHO and IHME NMR estimates

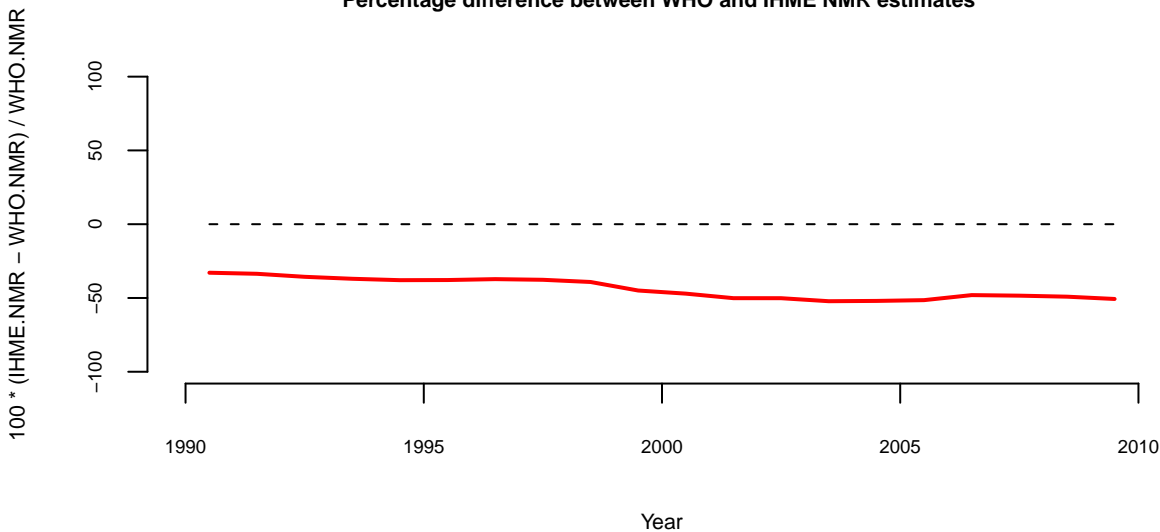

**Brazil**  
Paired t-test: p-value = 2.7e-12

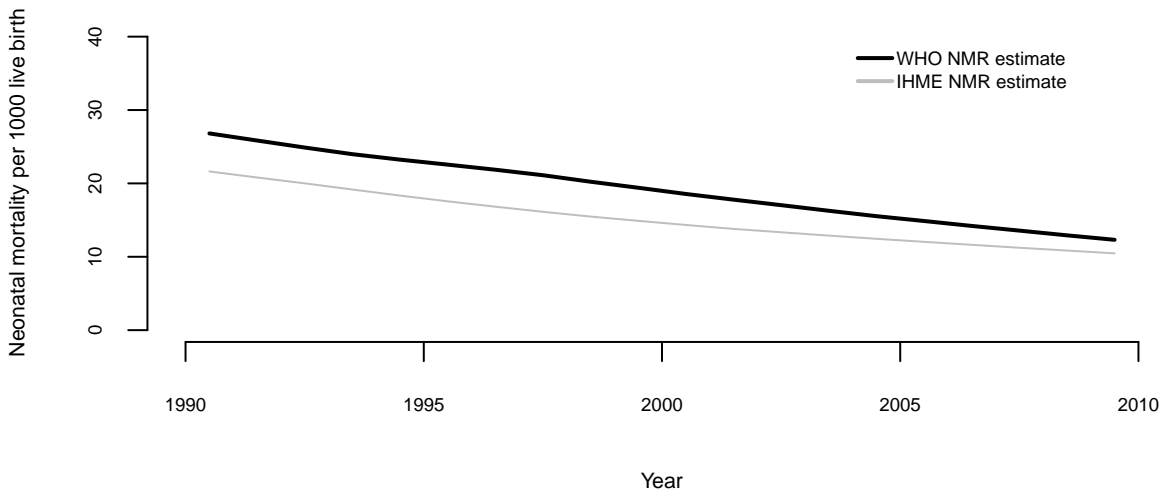

**Brazil**  
Percentage difference between WHO and IHME NMR estimates

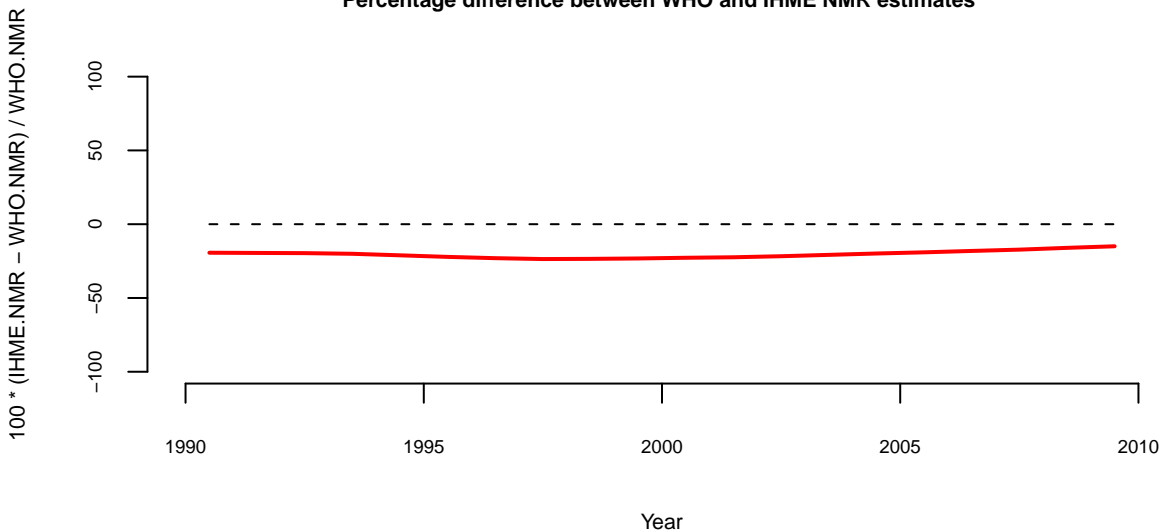

**Brunei Darussalam**  
**Paired t-test: p-value = 1.6e-22**

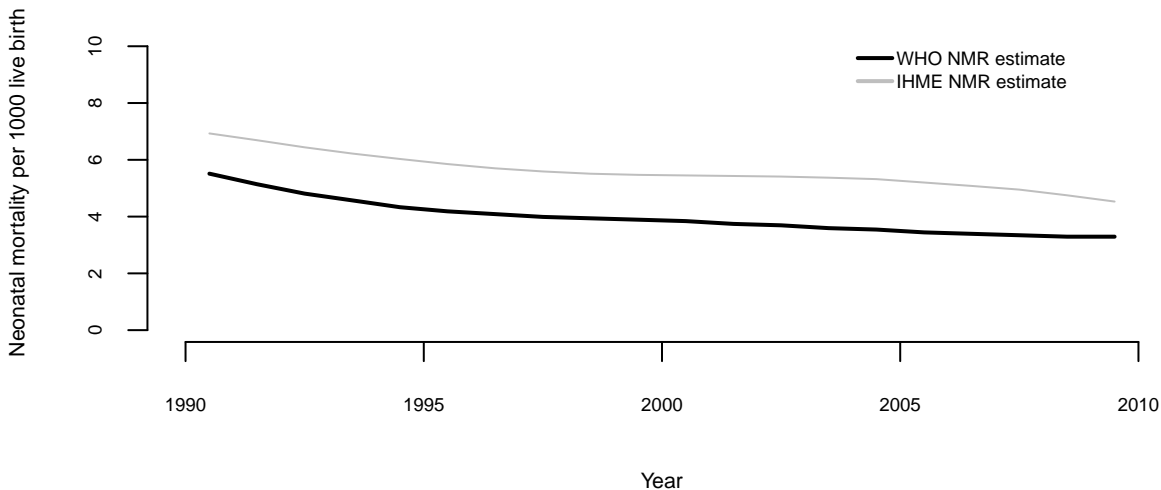

**Brunei Darussalam**  
**Percentage difference between WHO and IHME NMR estimates**

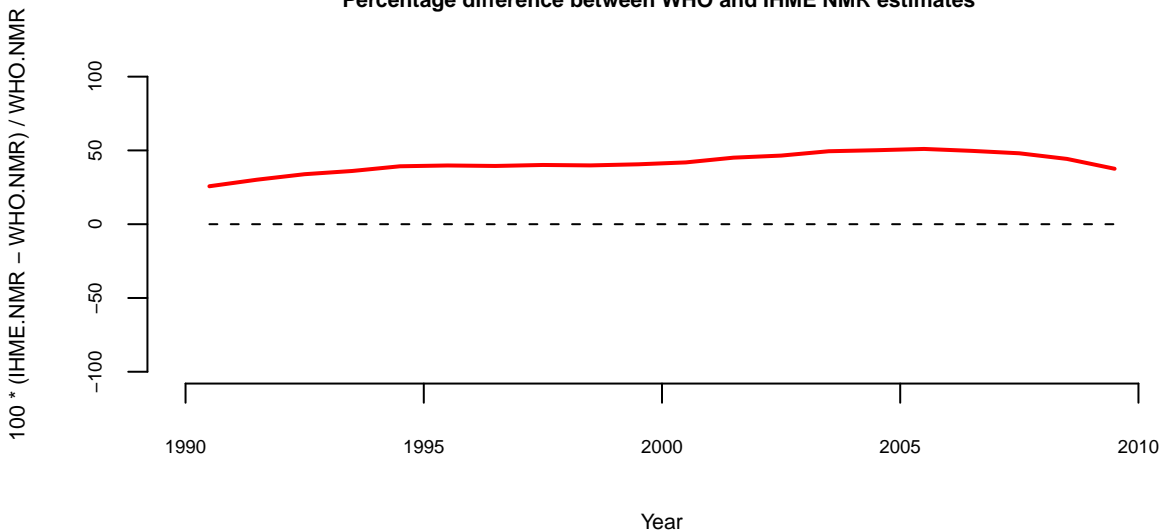

**Bulgaria**  
Paired t-test: p-value = 1.4e-05

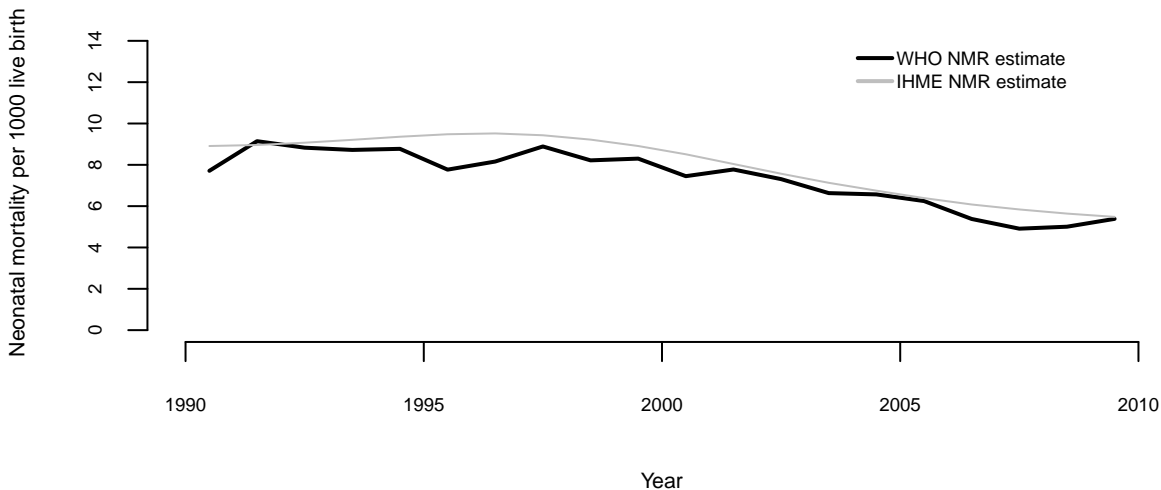

**Bulgaria**  
Percentage difference between WHO and IHME NMR estimates

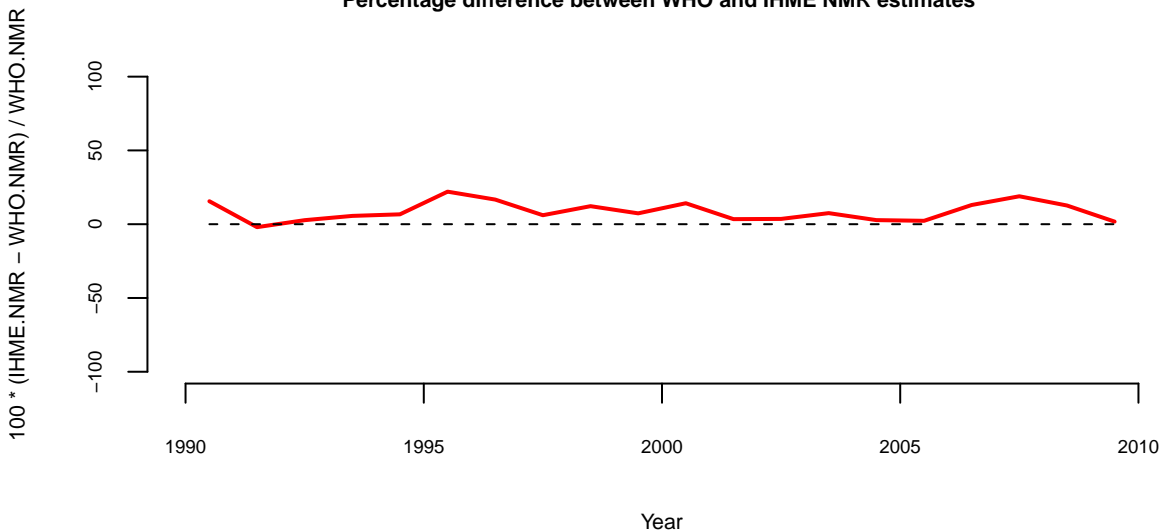

**Burkina Faso**  
**Paired t-test: p-value = 0.45**

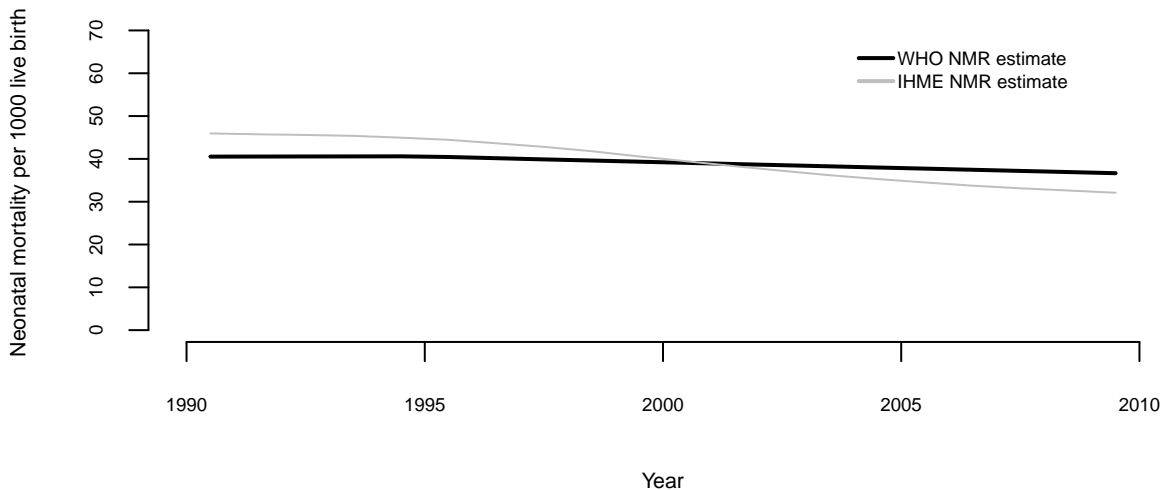

**Burkina Faso**  
**Percentage difference between WHO and IHME NMR estimates**

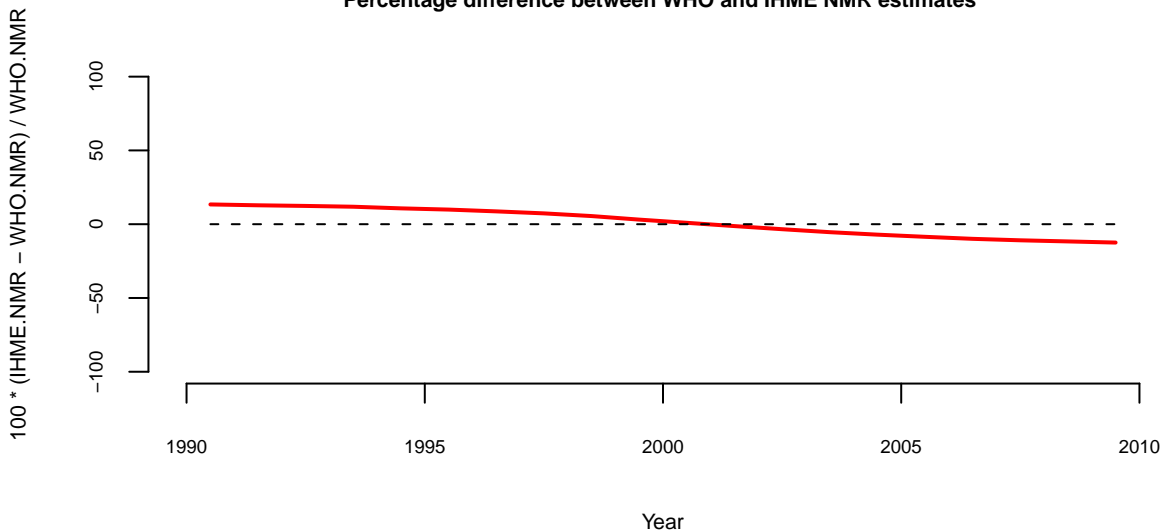

**Cambodia**  
**Paired t-test: p-value = 0.054**

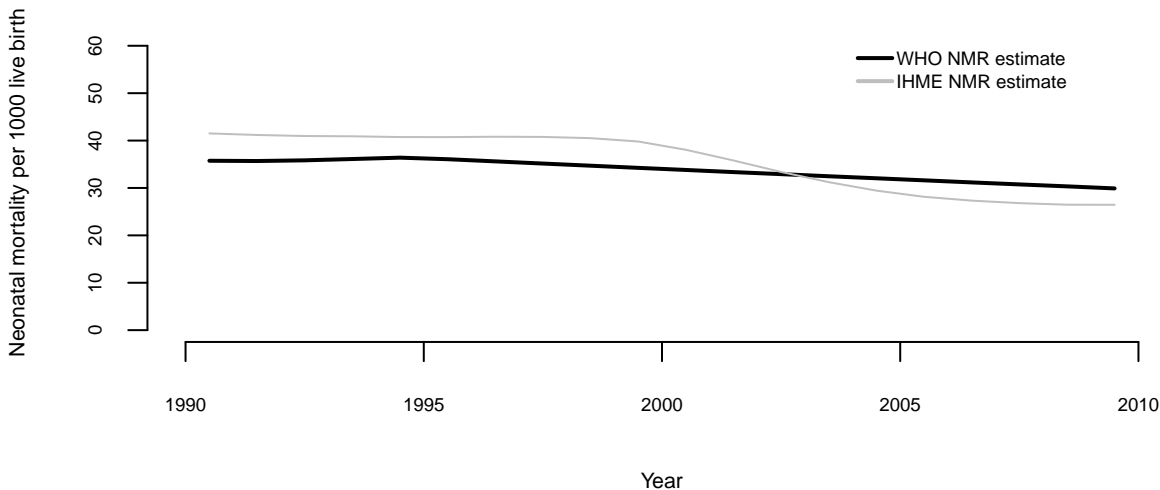

**Cambodia**  
**Percentage difference between WHO and IHME NMR estimates**

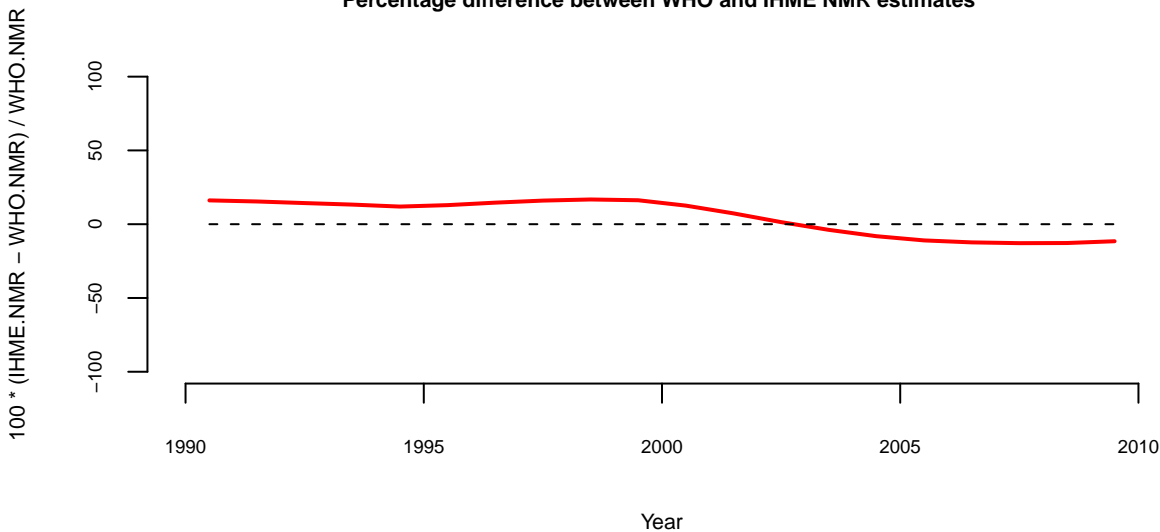

**Cameroon**  
**Paired t-test: p-value = 0.00066**

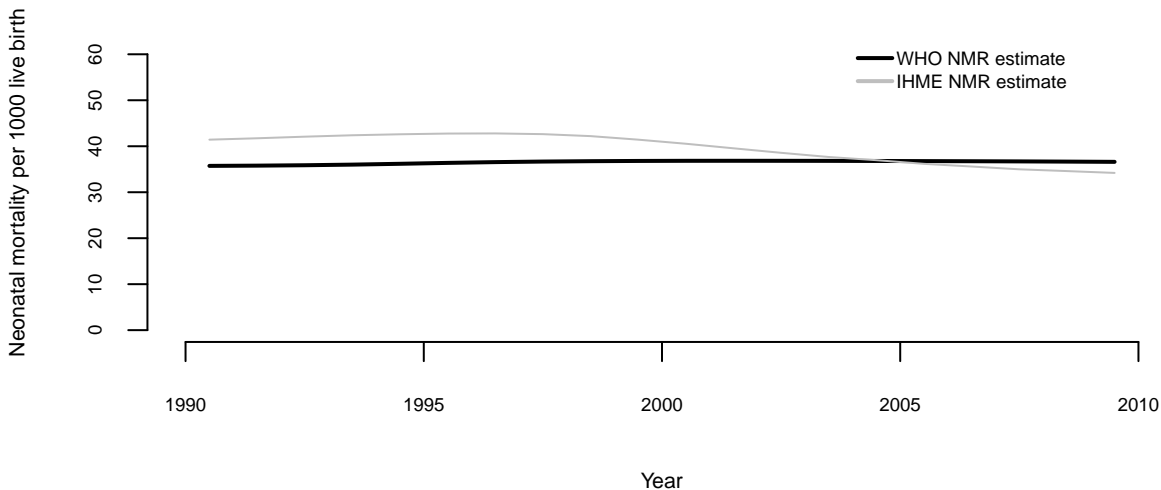

**Cameroon**  
**Percentage difference between WHO and IHME NMR estimates**

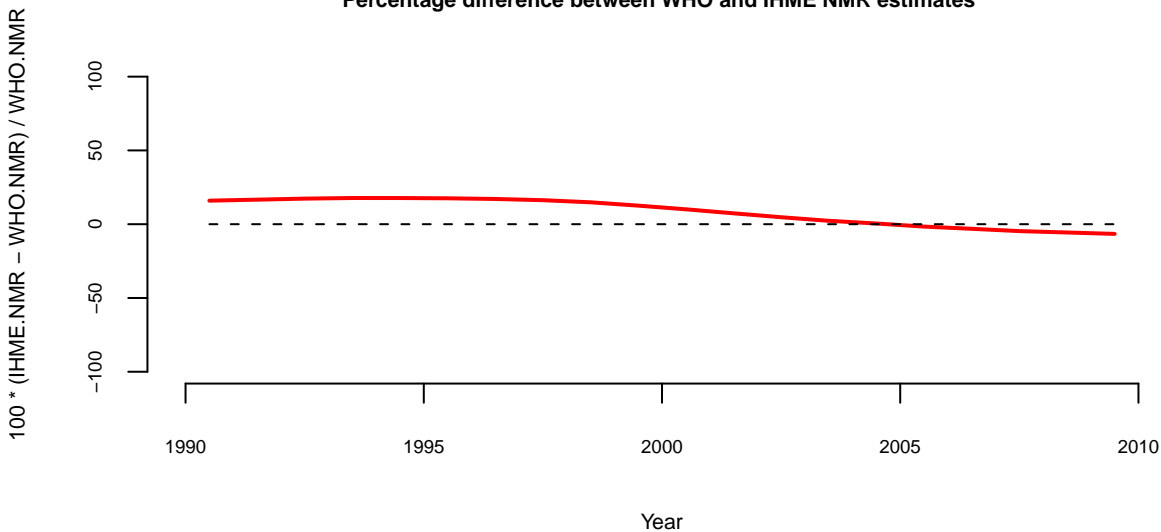

**Canada**  
Paired t-test: p-value = 0.12

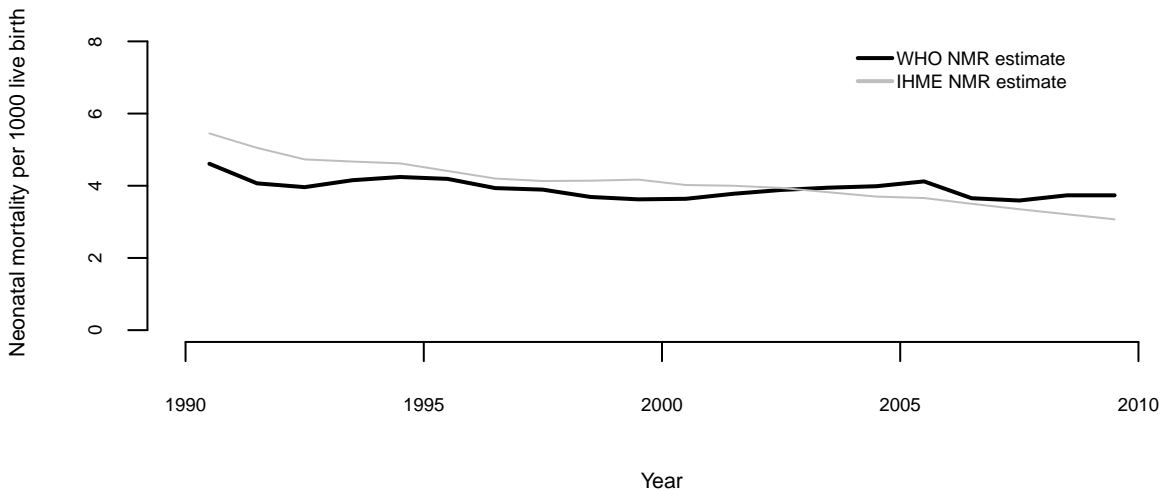

**Canada**  
Percentage difference between WHO and IHME NMR estimates

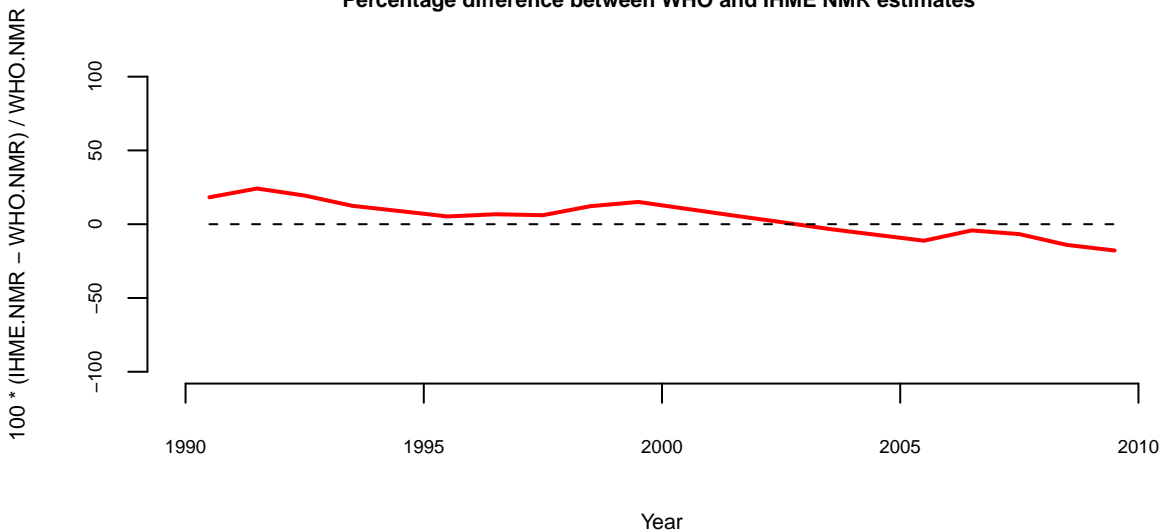

**Cape Verde**  
**Paired t-test: p-value = 0.016**

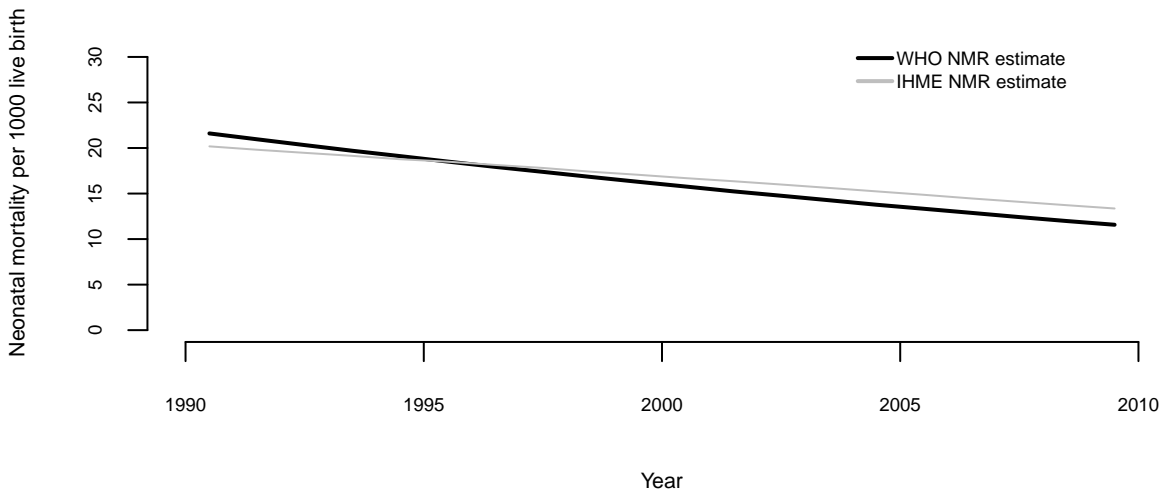

**Cape Verde**  
**Percentage difference between WHO and IHME NMR estimates**

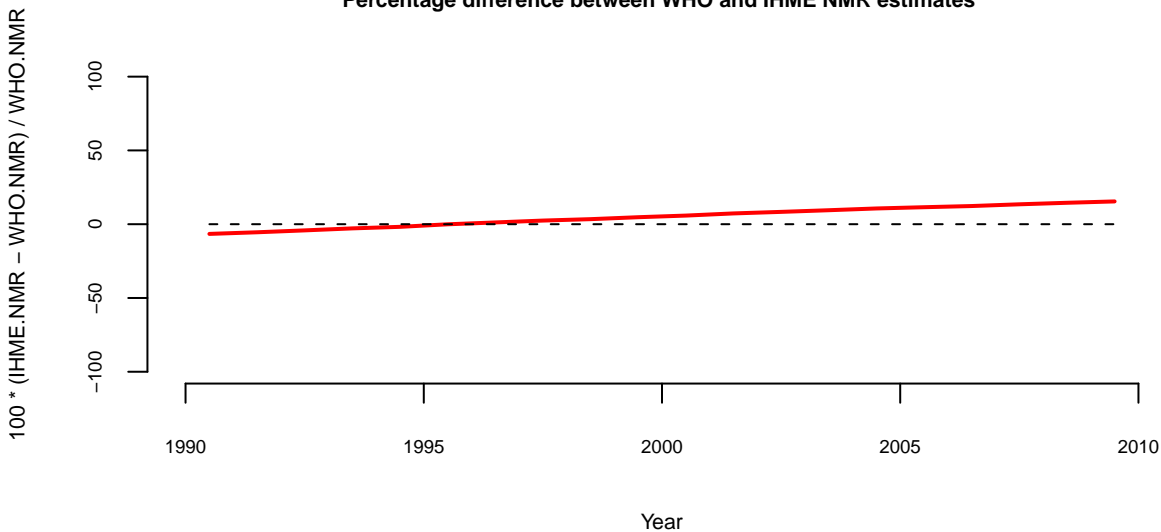

**Central African Republic**  
**Paired t-test: p-value = 0.00020**

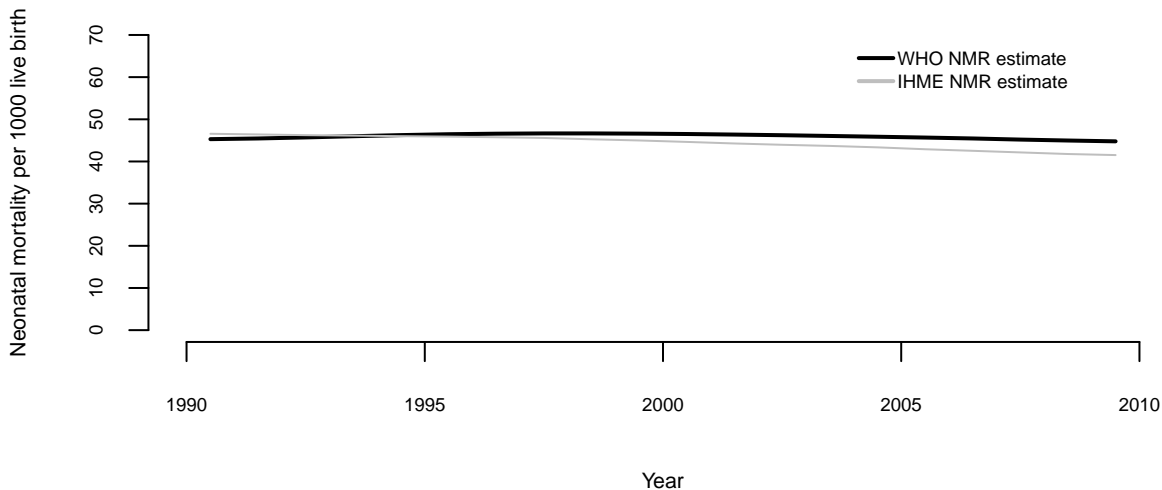

**Central African Republic**  
**Percentage difference between WHO and IHME NMR estimates**

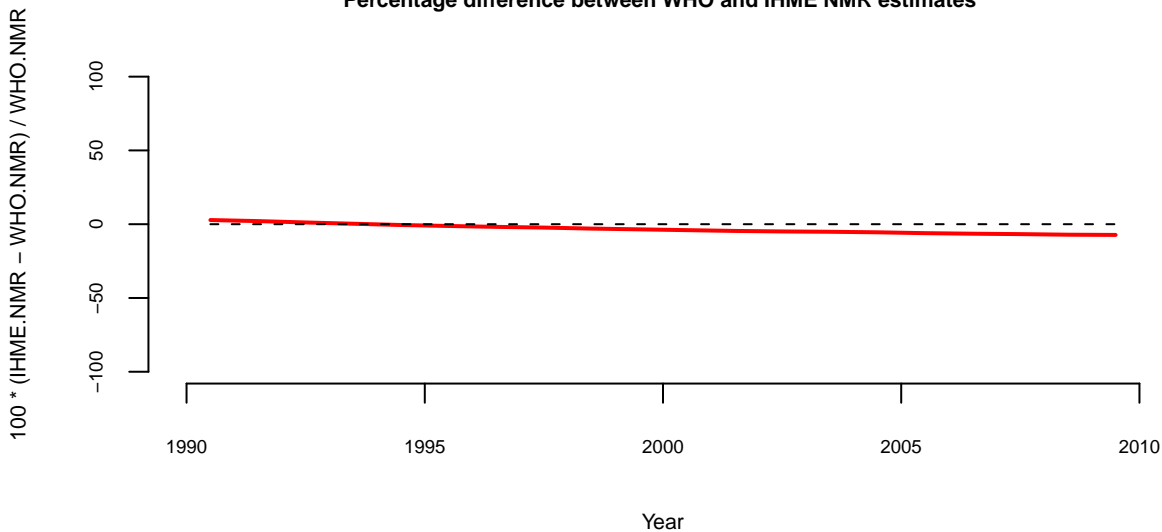

**Chad**  
**Paired t-test: p-value = 0.18**

Neonatal mortality per 1000 live birth

— WHO NMR estimate  
— IHME NMR estimate

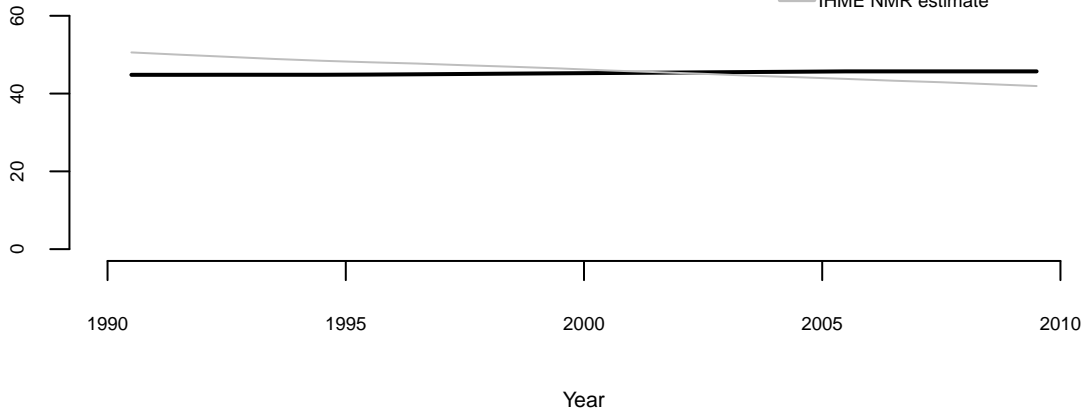

**Chad**  
**Percentage difference between WHO and IHME NMR estimates**

$100 * (\text{IHME.NMR} - \text{WHO.NMR}) / \text{WHO.NMR}$

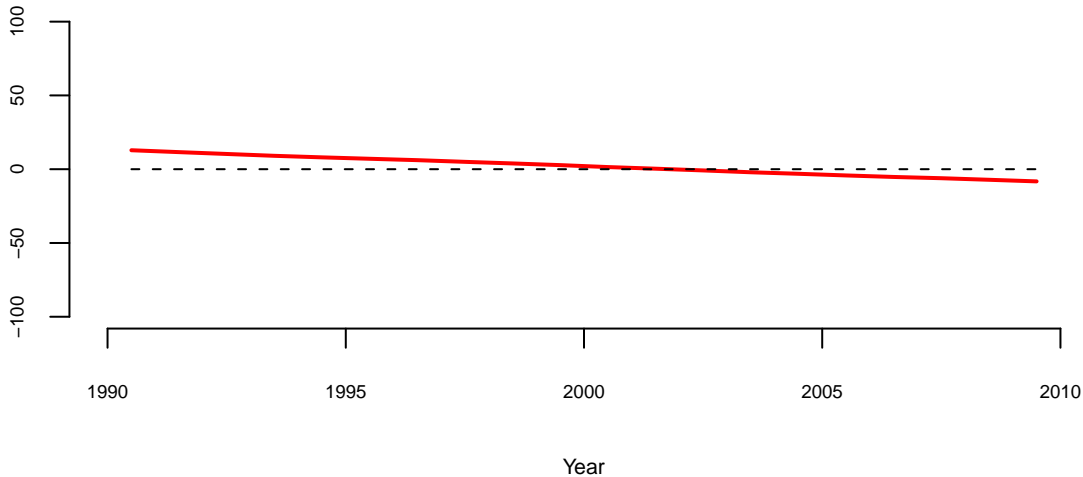

**Chile**  
**Paired t-test: p-value = 0.0013**

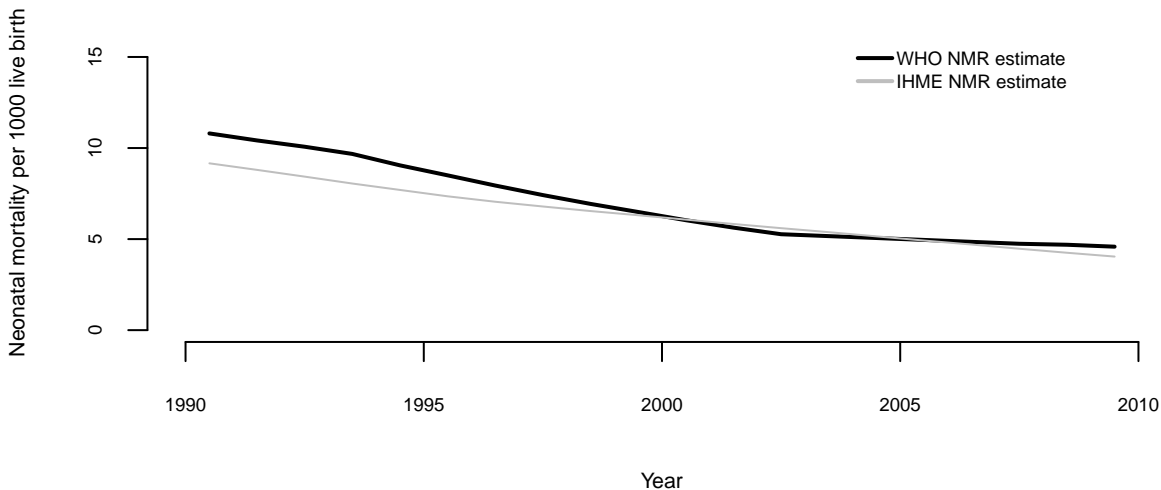

**Chile**  
**Percentage difference between WHO and IHME NMR estimates**

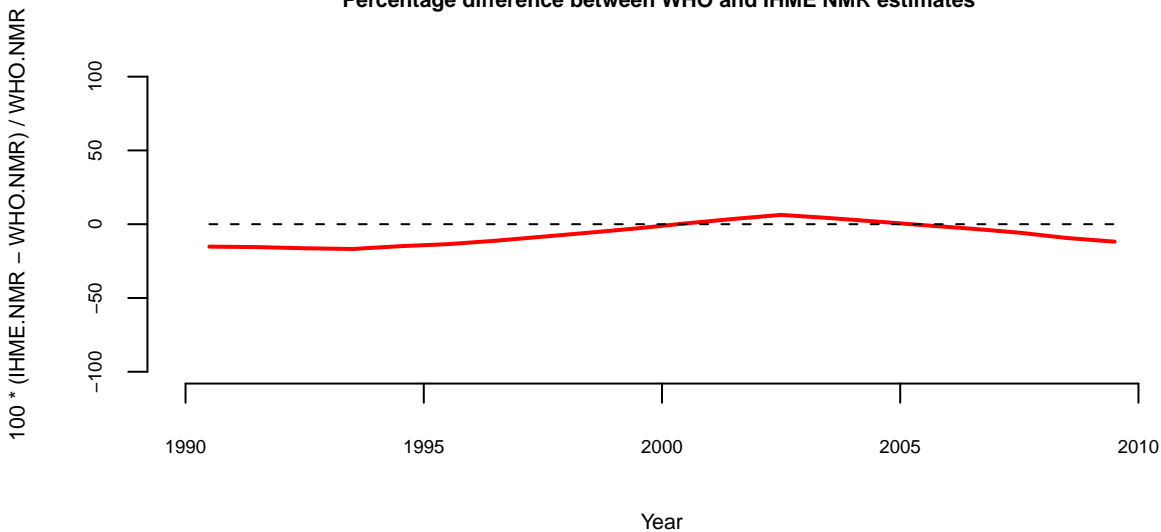

**China**  
**Paired t-test: p-value = 0.072**

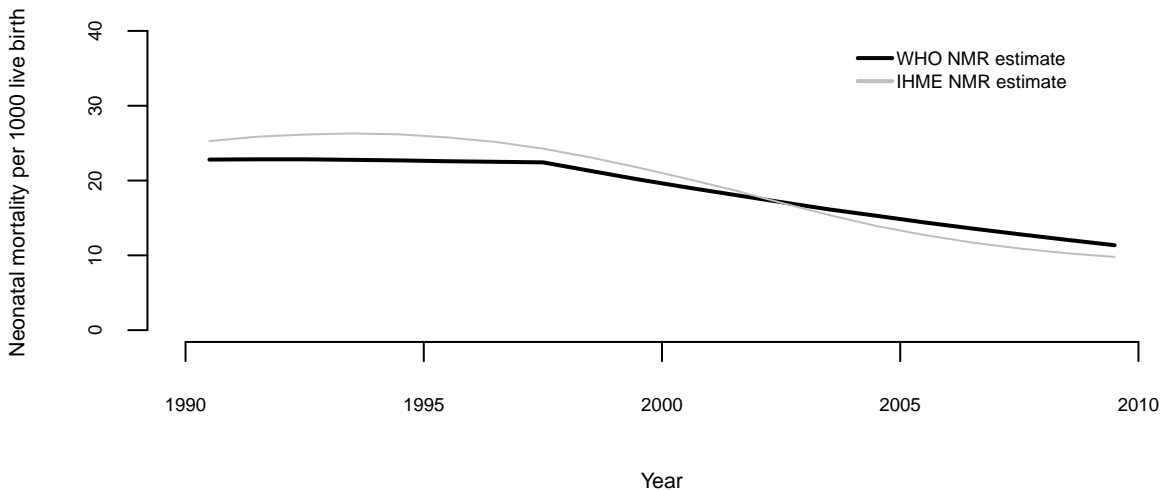

**China**  
**Percentage difference between WHO and IHME NMR estimates**

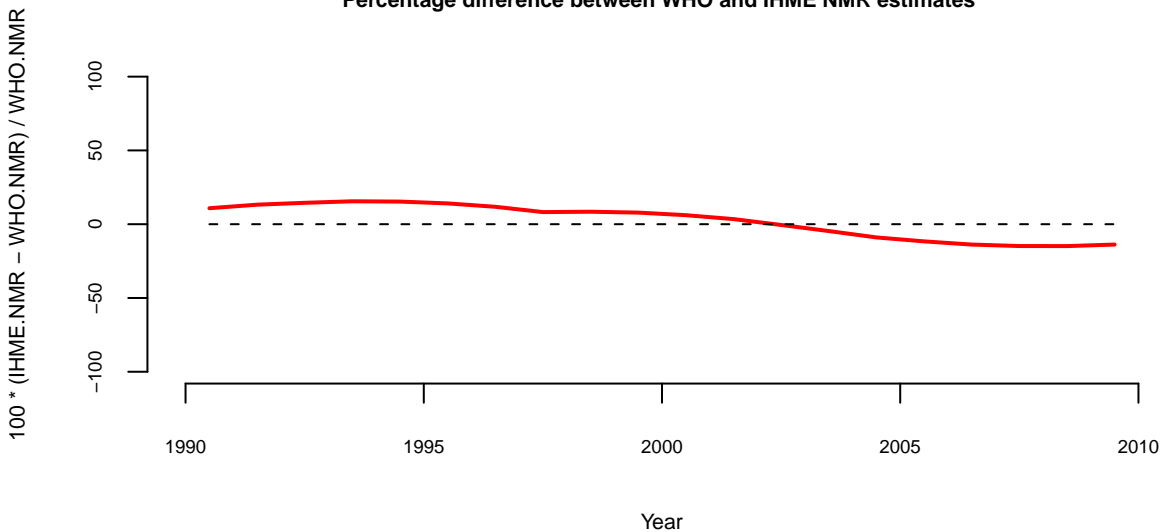

**Colombia**  
**Paired t-test: p-value = 6.7e-15**

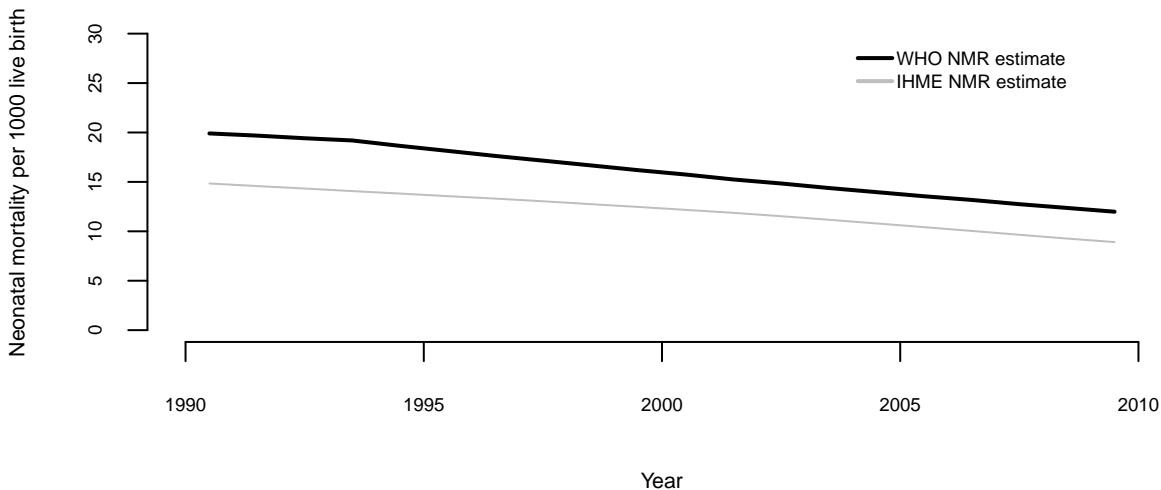

**Colombia**  
**Percentage difference between WHO and IHME NMR estimates**

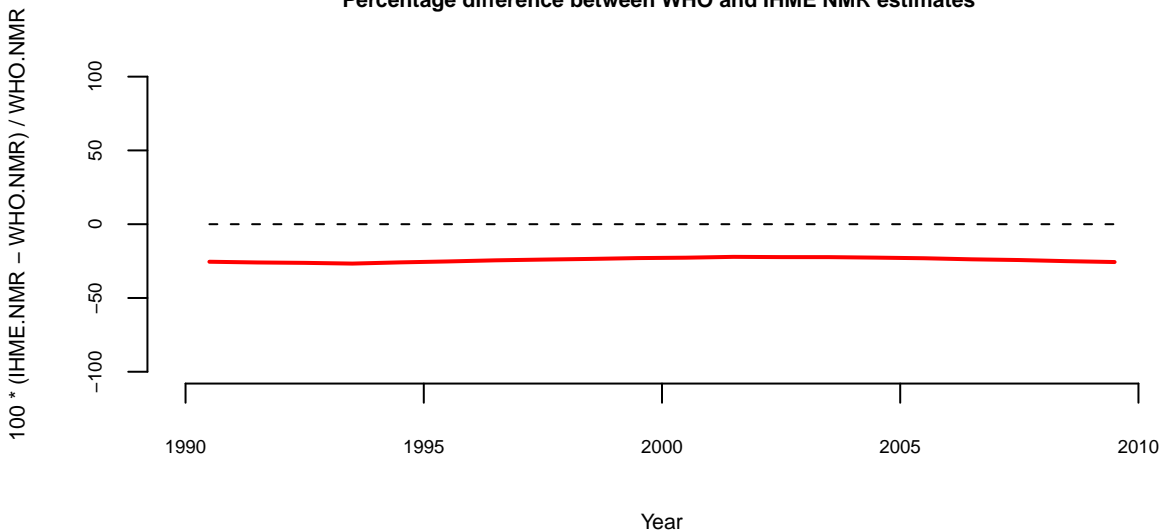

**Comoros**  
**Paired t-test: p-value = 0.41**

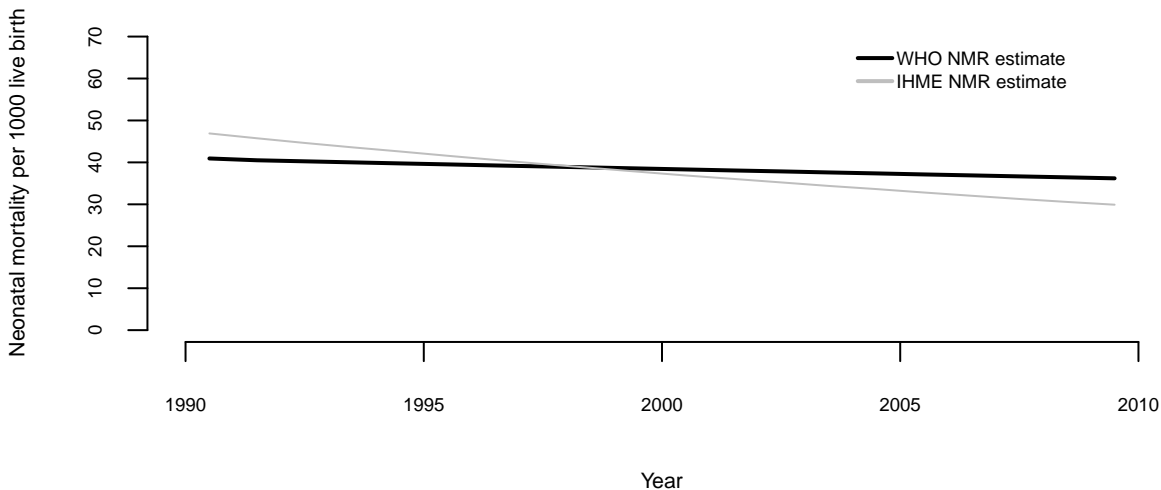

**Comoros**  
**Percentage difference between WHO and IHME NMR estimates**

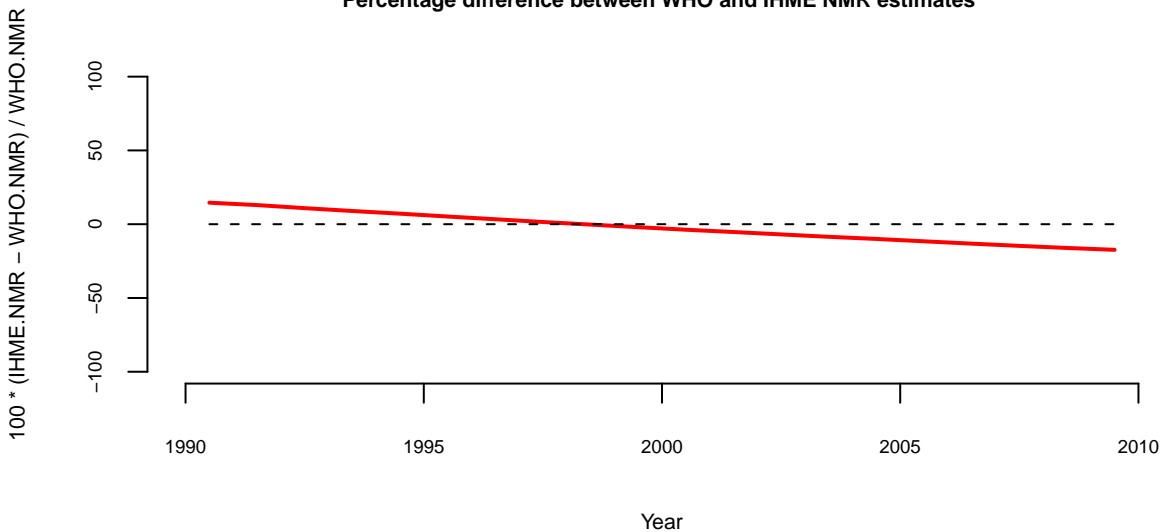

**Congo**  
**Paired t-test: p-value = 1.2e-06**

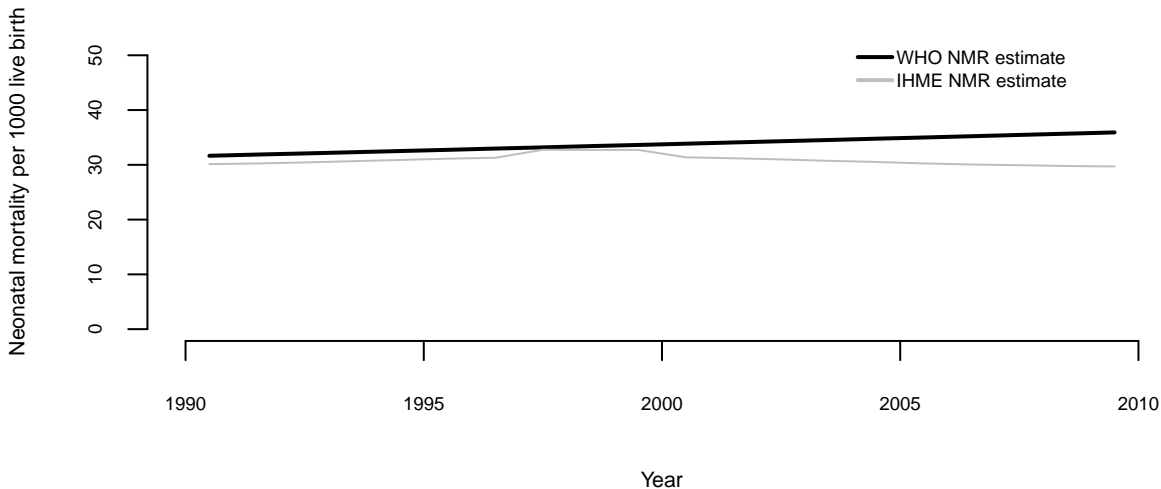

**Congo**  
**Percentage difference between WHO and IHME NMR estimates**

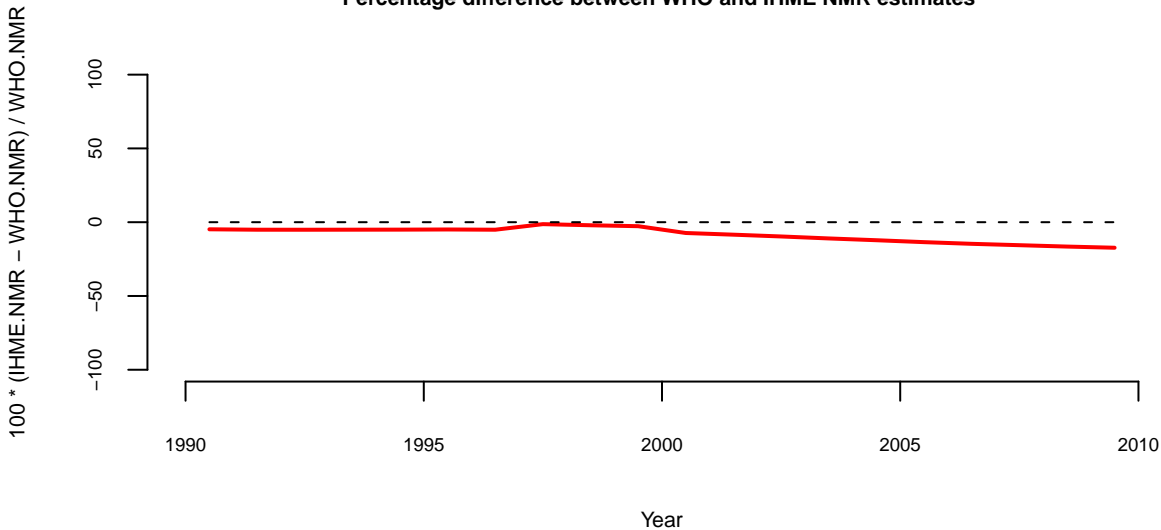

**Costa Rica**  
**Paired t-test: p-value = 0.0044**

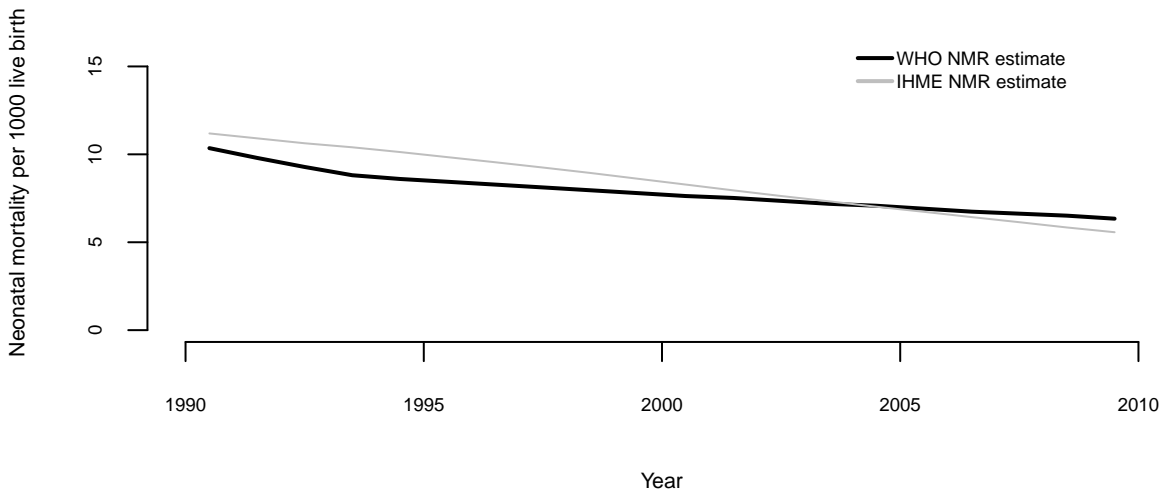

**Costa Rica**  
**Percentage difference between WHO and IHME NMR estimates**

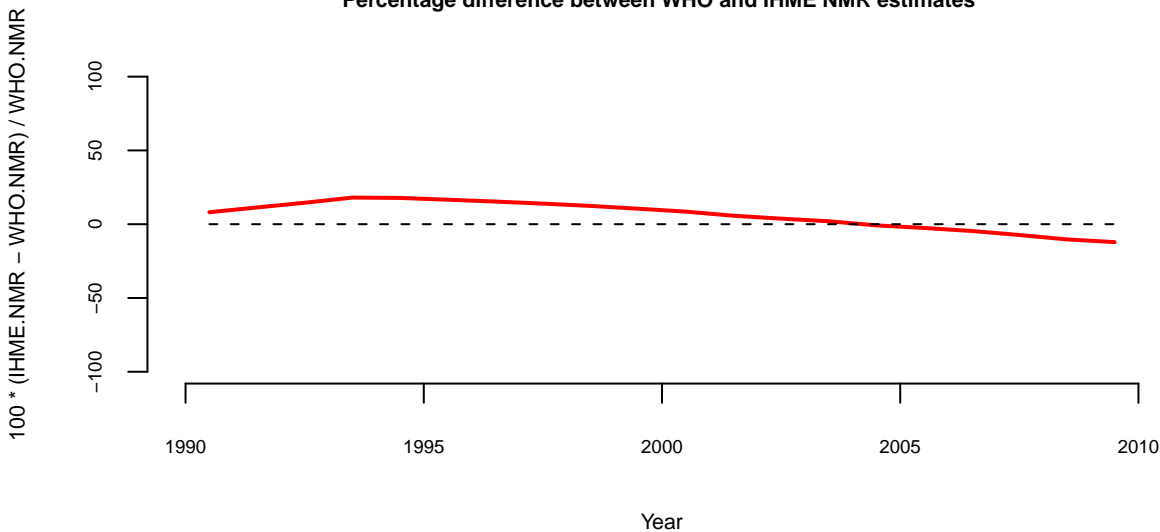

**Cote d'Ivoire**  
**Paired t-test: p-value = 0.46**

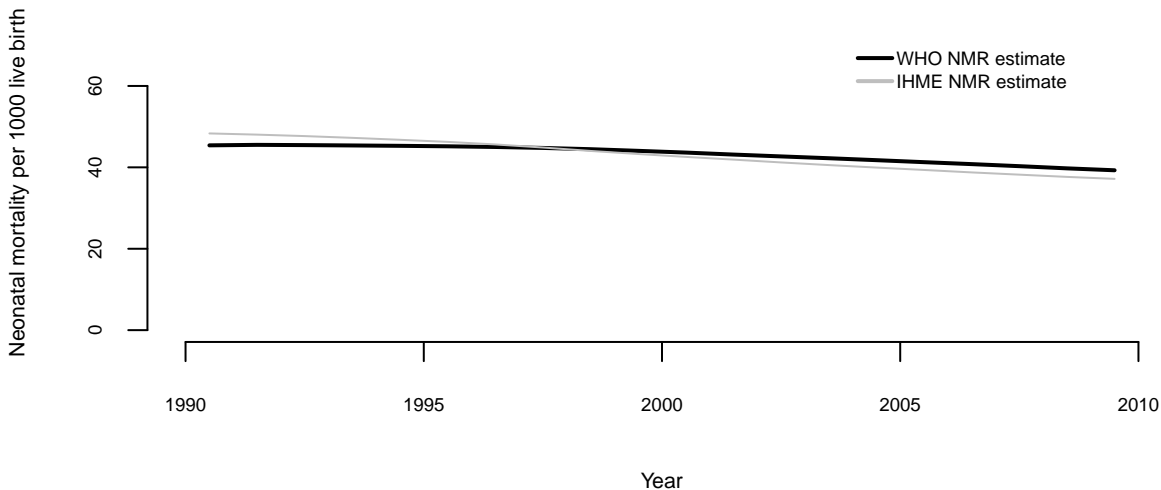

**Cote d'Ivoire**  
**Percentage difference between WHO and IHME NMR estimates**

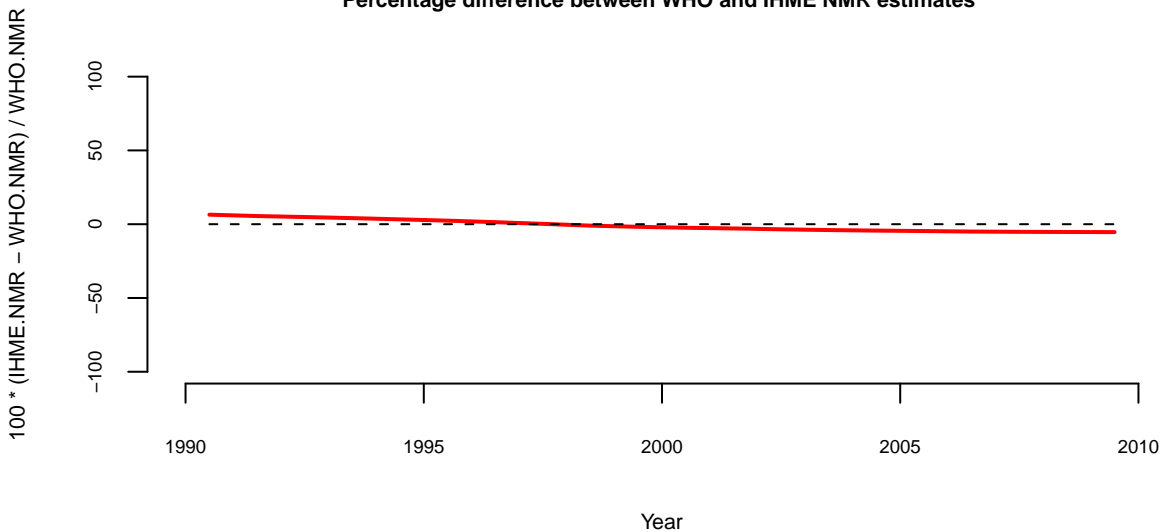

**Croatia**  
**Paired t-test: p-value = 5.8e-05**

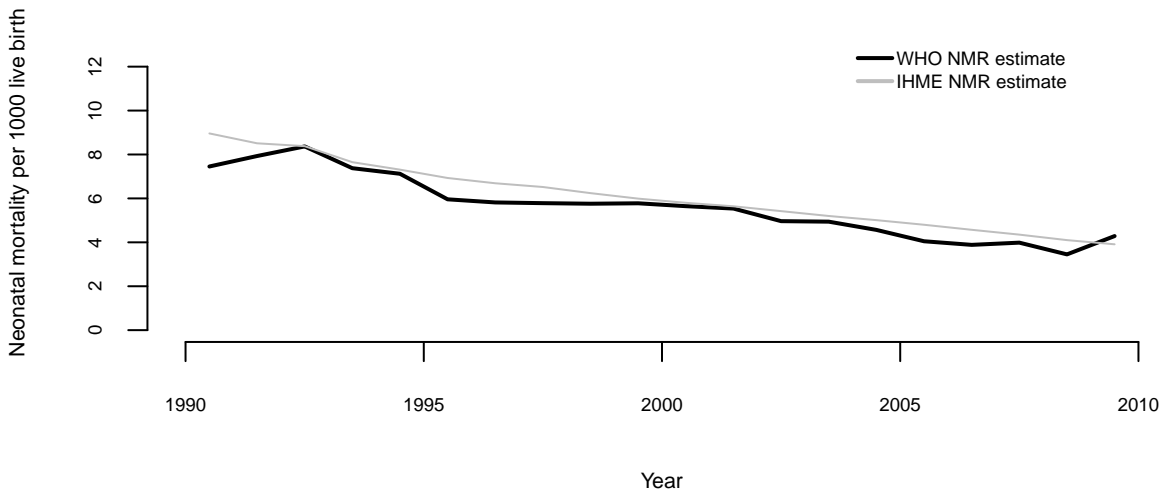

**Croatia**  
**Percentage difference between WHO and IHME NMR estimates**

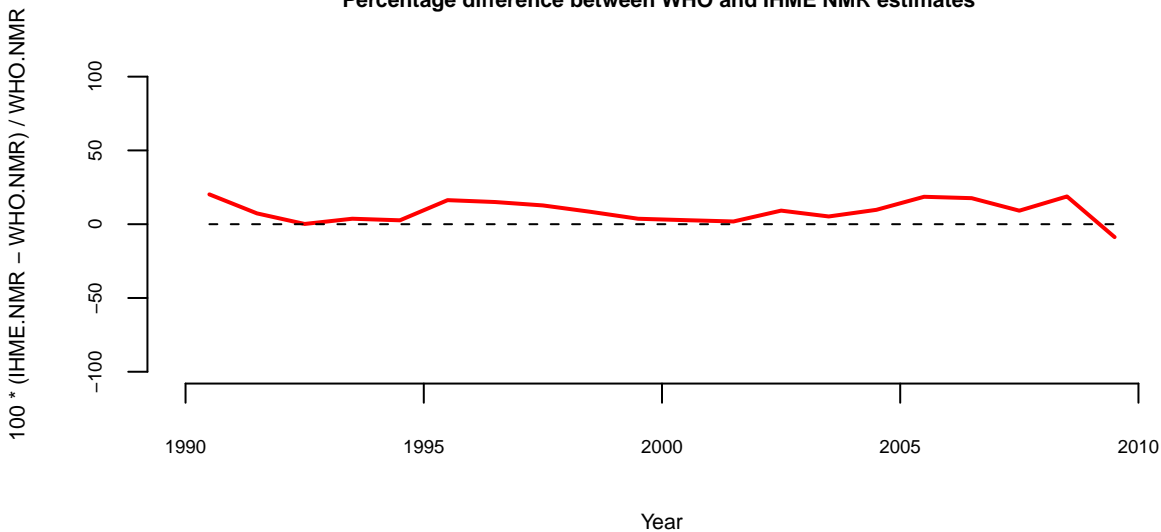

**Cuba**  
**Paired t-test: p-value = 2.8e-05**

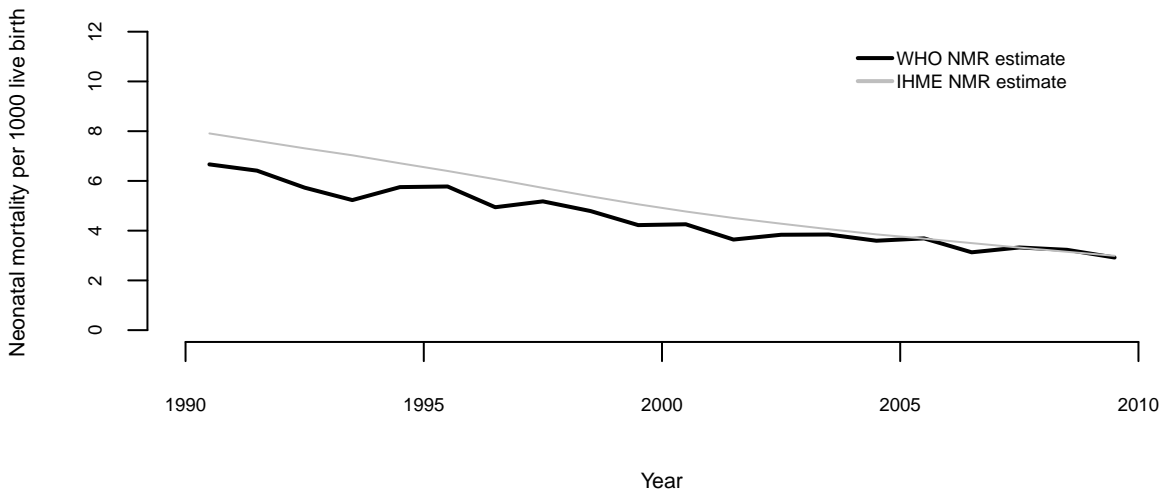

**Cuba**  
**Percentage difference between WHO and IHME NMR estimates**

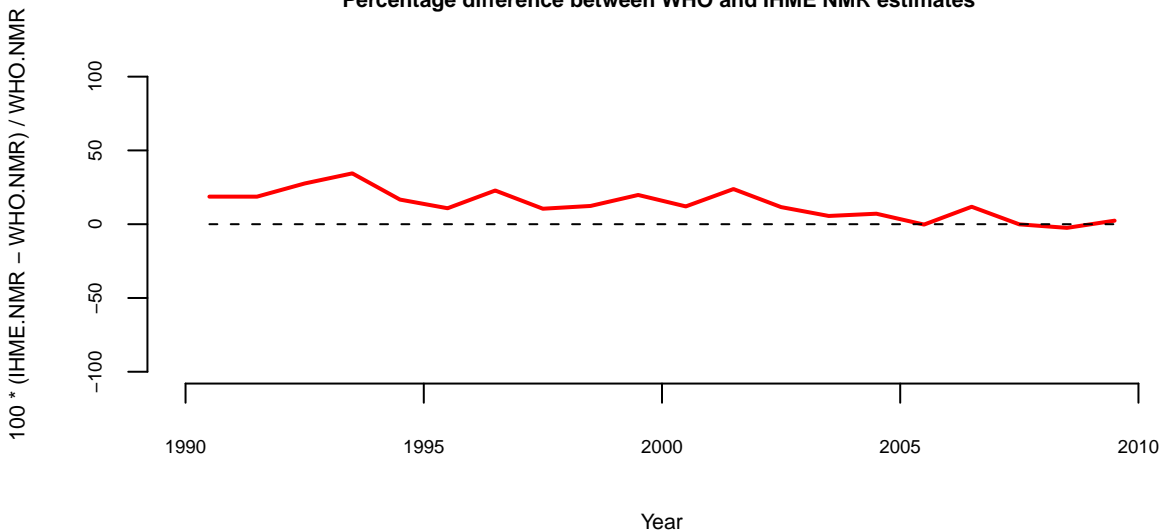

**Cyprus**  
**Paired t-test: p-value = 4.5e-06**

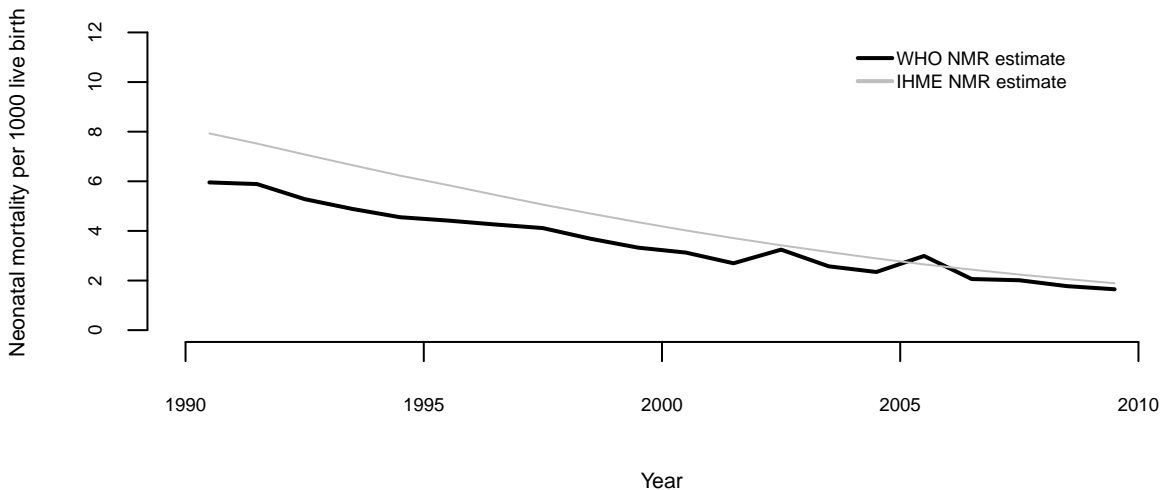

**Cyprus**  
**Percentage difference between WHO and IHME NMR estimates**

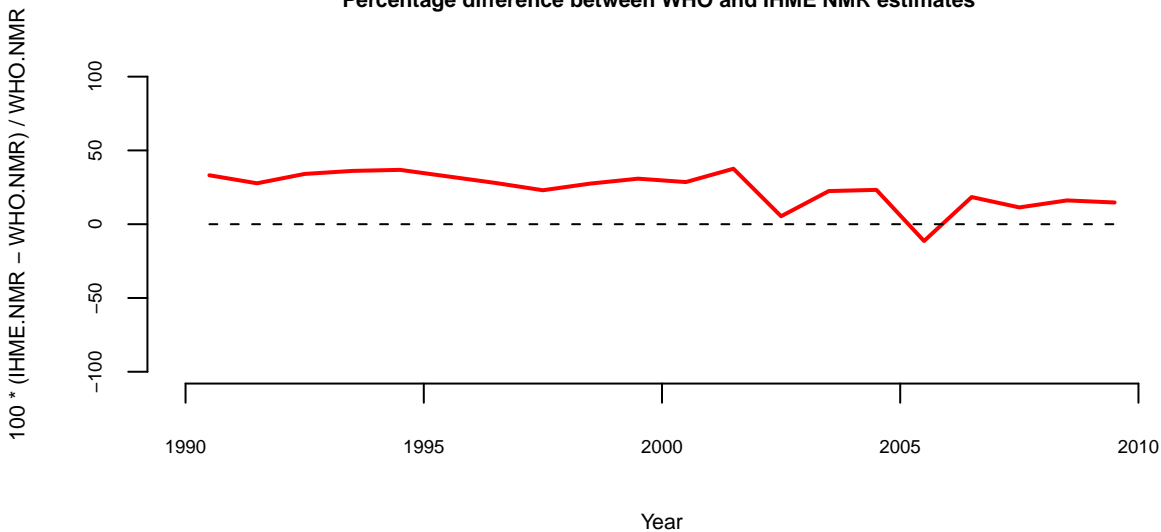

**Czech Republic**  
Paired t-test: p-value =  $2.8e-09$

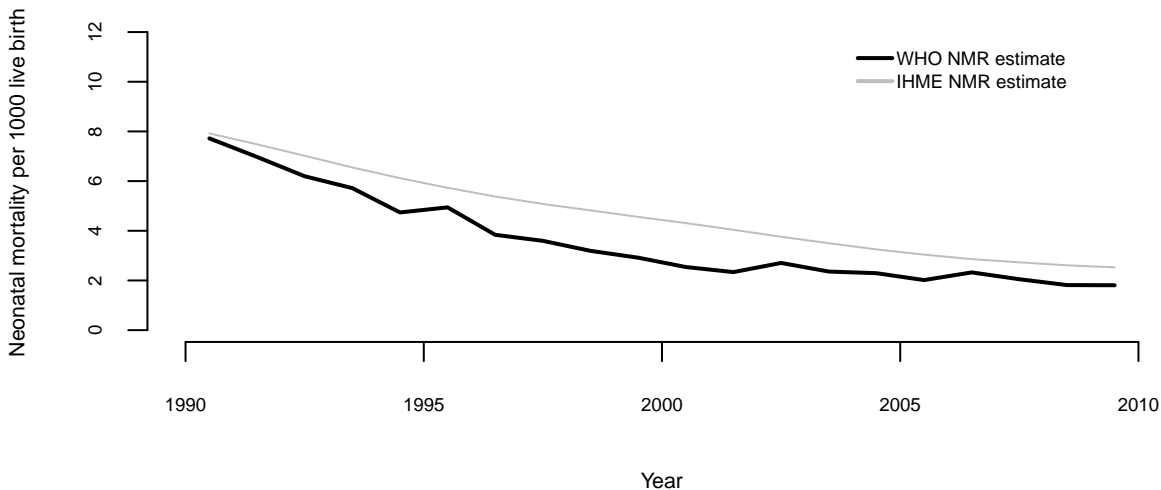

**Czech Republic**  
Percentage difference between WHO and IHME NMR estimates

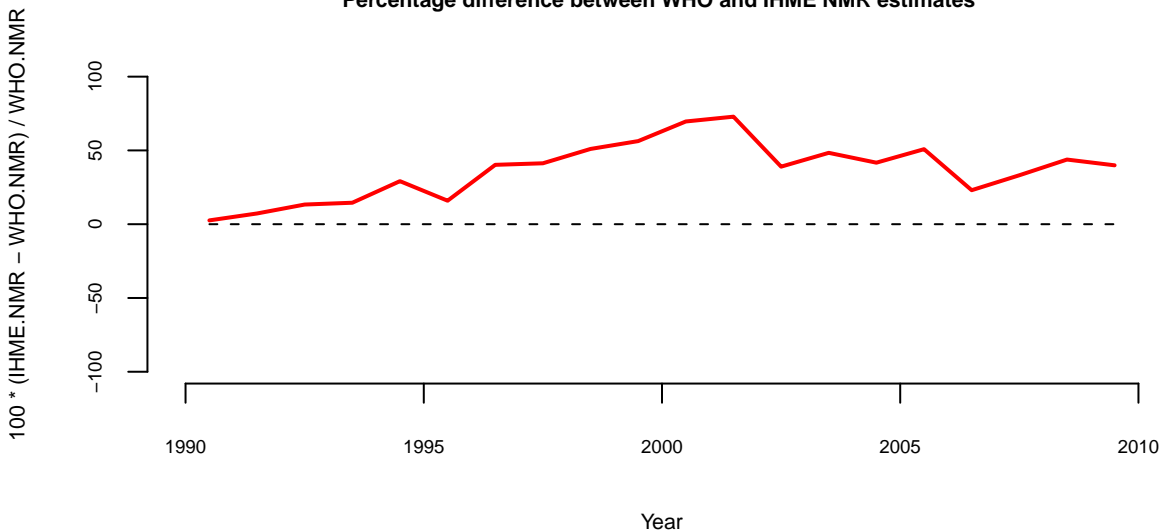

**Democratic Republic of the Congo**  
**Paired t-test: p-value = 1.7e-16**

Neonatal mortality per 1000 live birth

— WHO NMR estimate  
— IHME NMR estimate

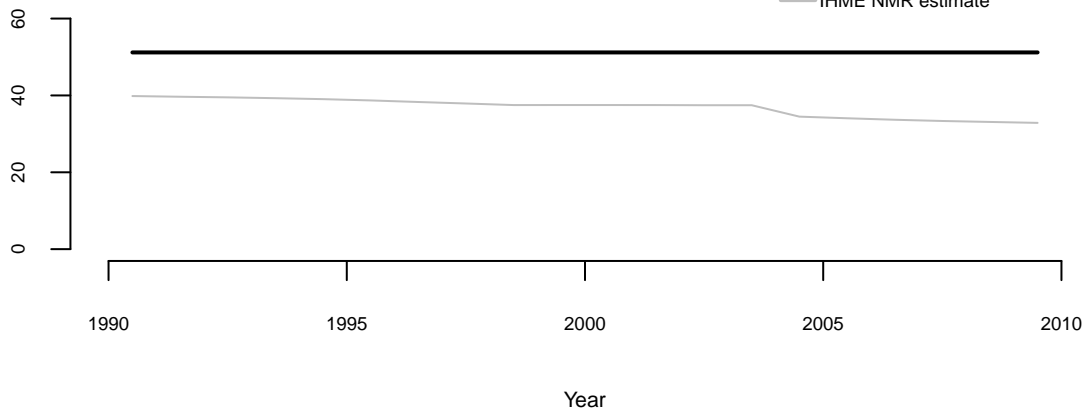

**Democratic Republic of the Congo**  
**Percentage difference between WHO and IHME NMR estimates**

$100 * (\text{IHME.NMR} - \text{WHO.NMR}) / \text{WHO.NMR}$

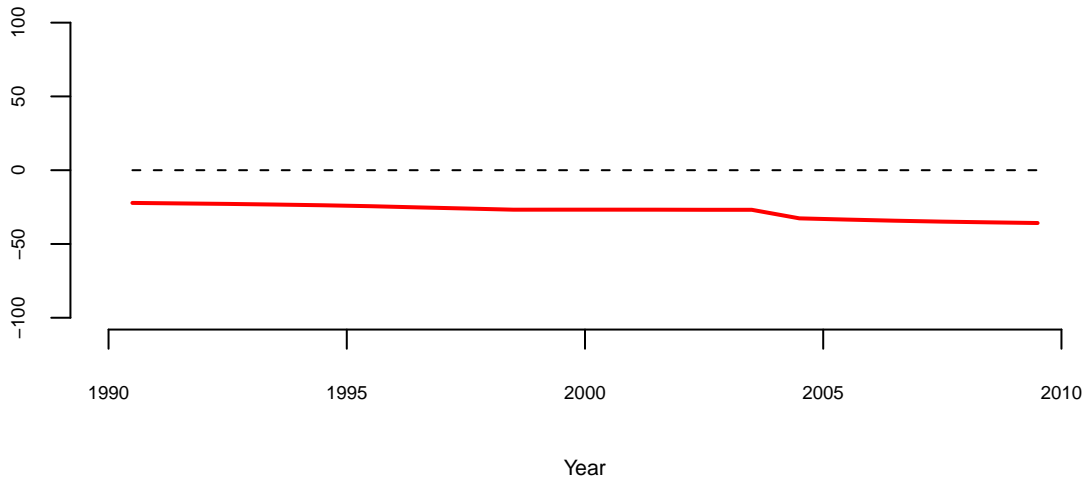

Denmark  
Paired t-test: p-value = 0.18

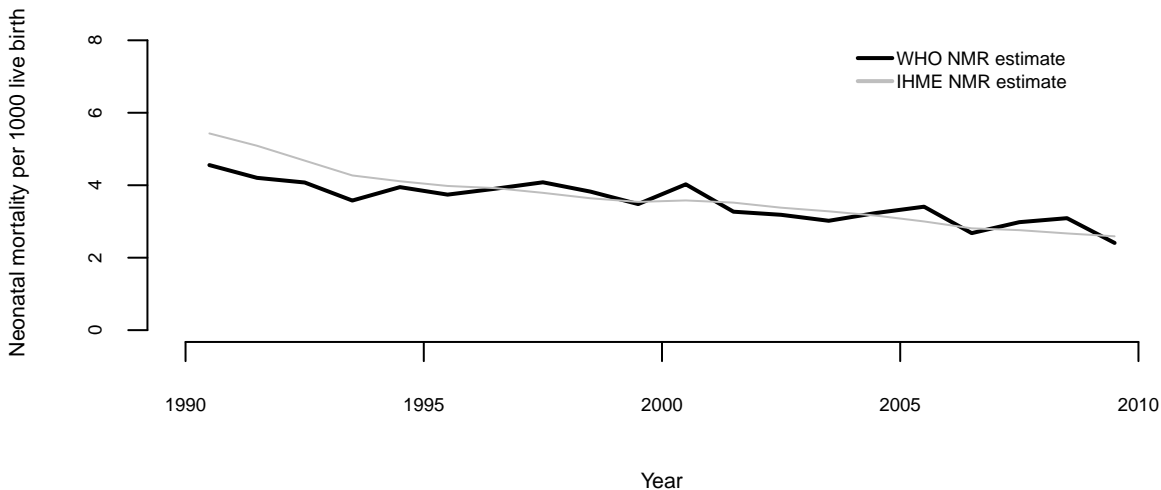

Denmark  
Percentage difference between WHO and IHME NMR estimates

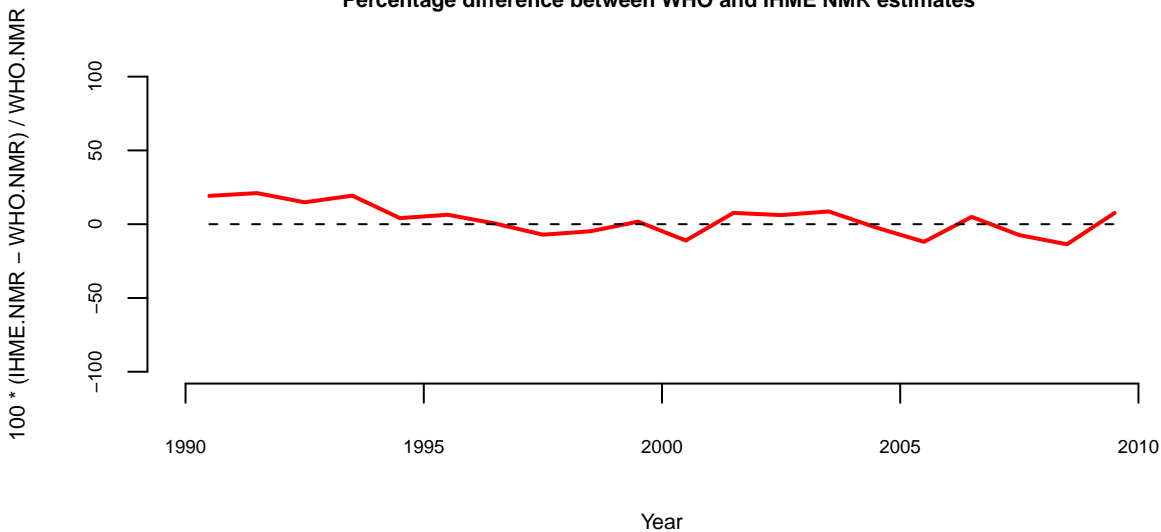

**Djibouti**  
**Paired t-test: p-value = 1.9e-18**

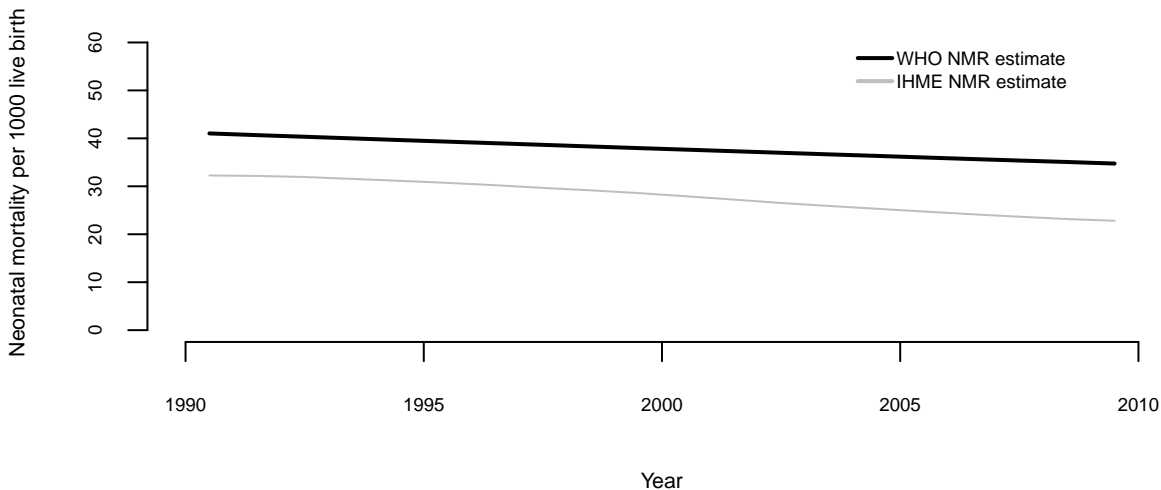

**Djibouti**  
**Percentage difference between WHO and IHME NMR estimates**

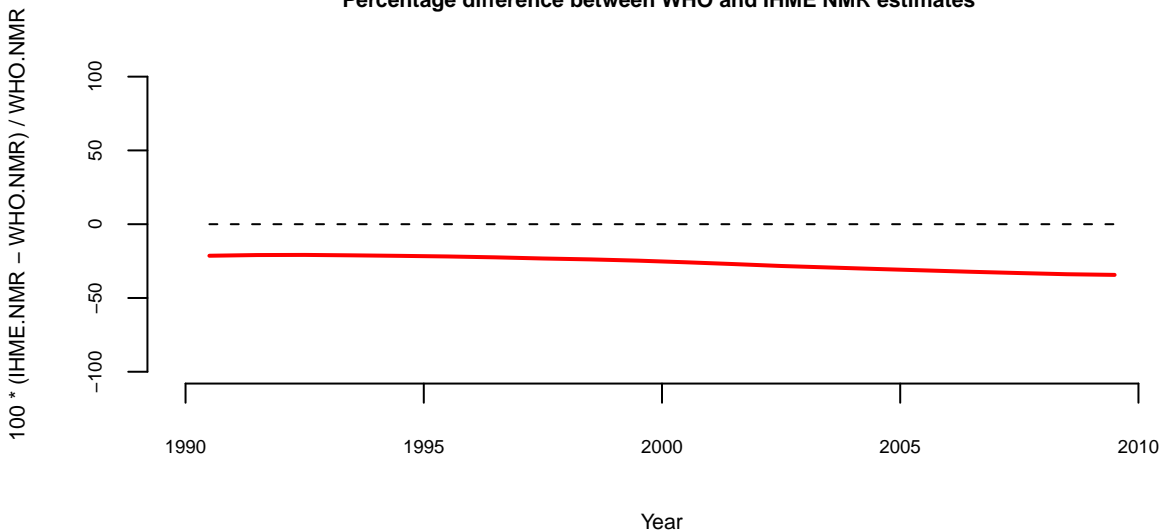

**Dominica**  
**Paired t-test: p-value = 0.021**

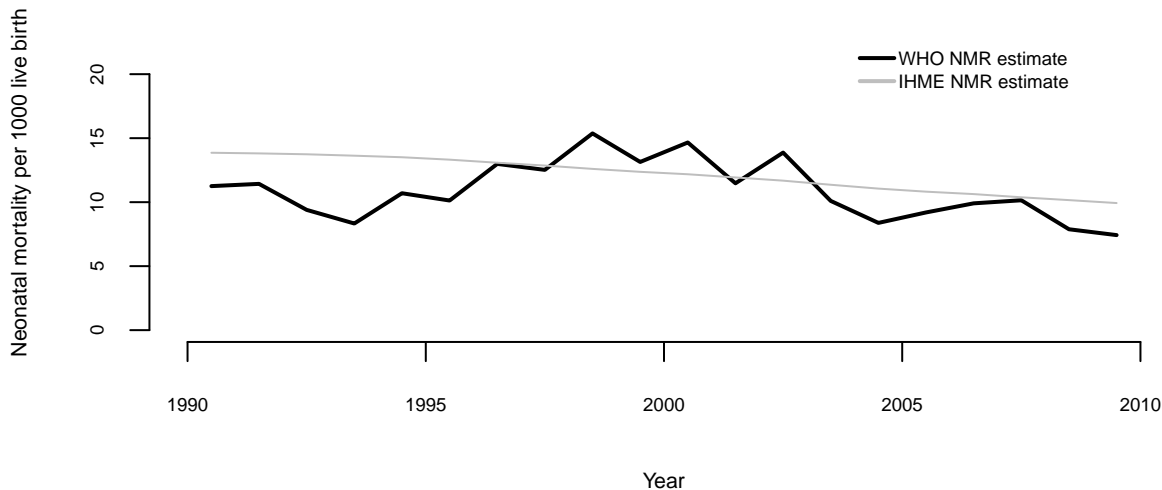

**Dominica**  
**Percentage difference between WHO and IHME NMR estimates**

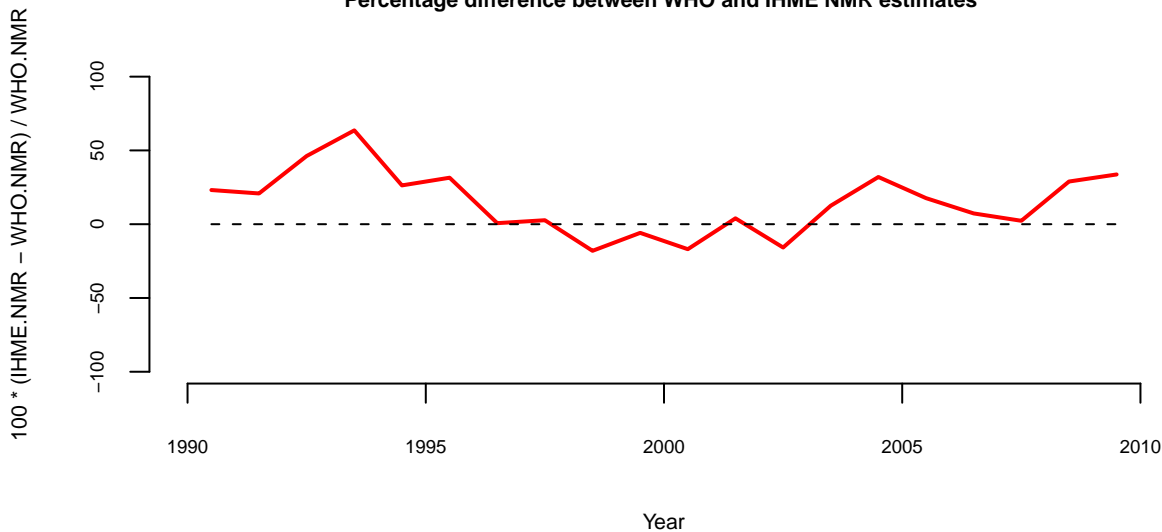

**Dominican Republic**  
**Paired t-test: p-value = 3.6e-10**

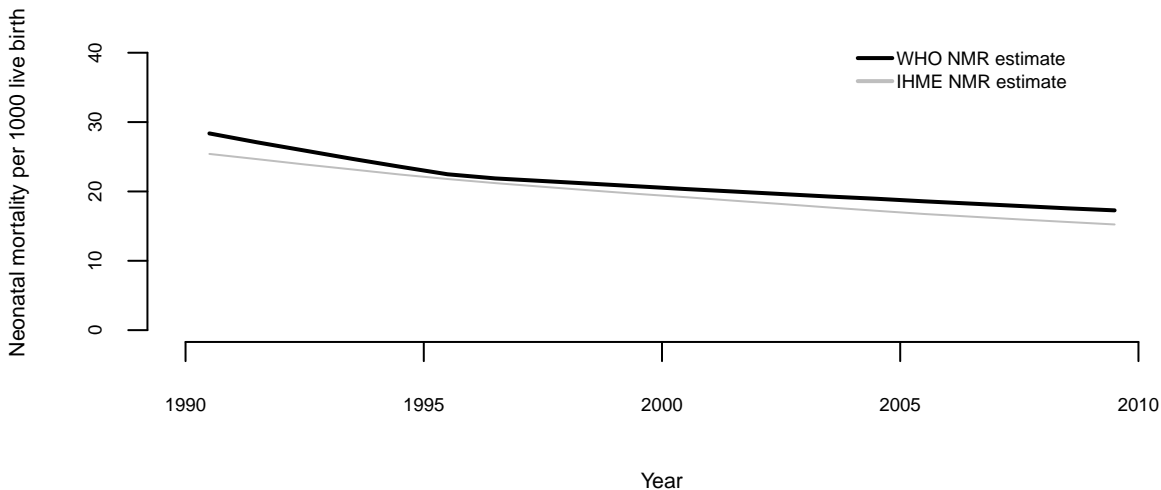

**Dominican Republic**  
**Percentage difference between WHO and IHME NMR estimates**

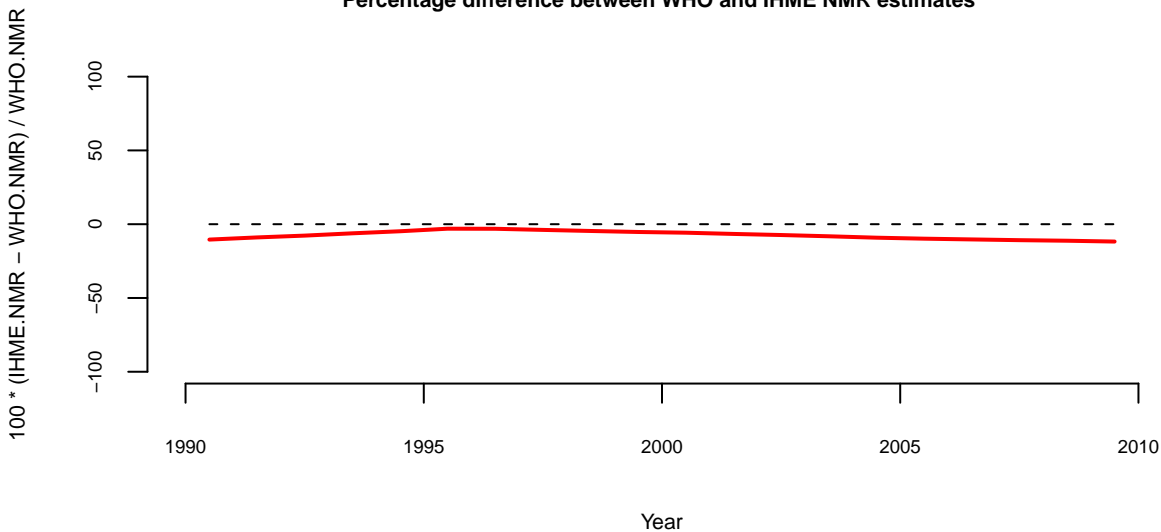

**Ecuador**  
**Paired t-test: p-value = 7.3e-24**

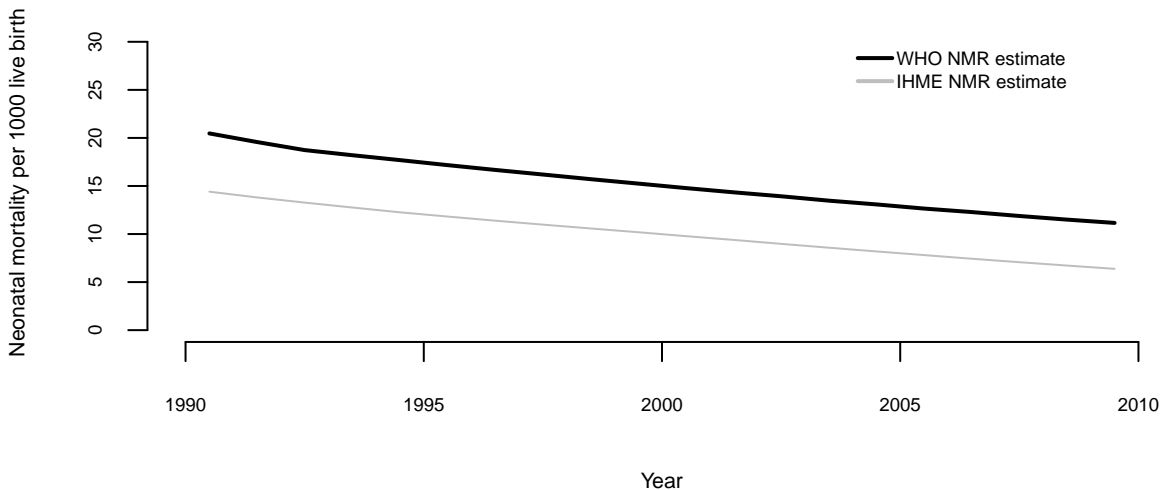

**Ecuador**  
**Percentage difference between WHO and IHME NMR estimates**

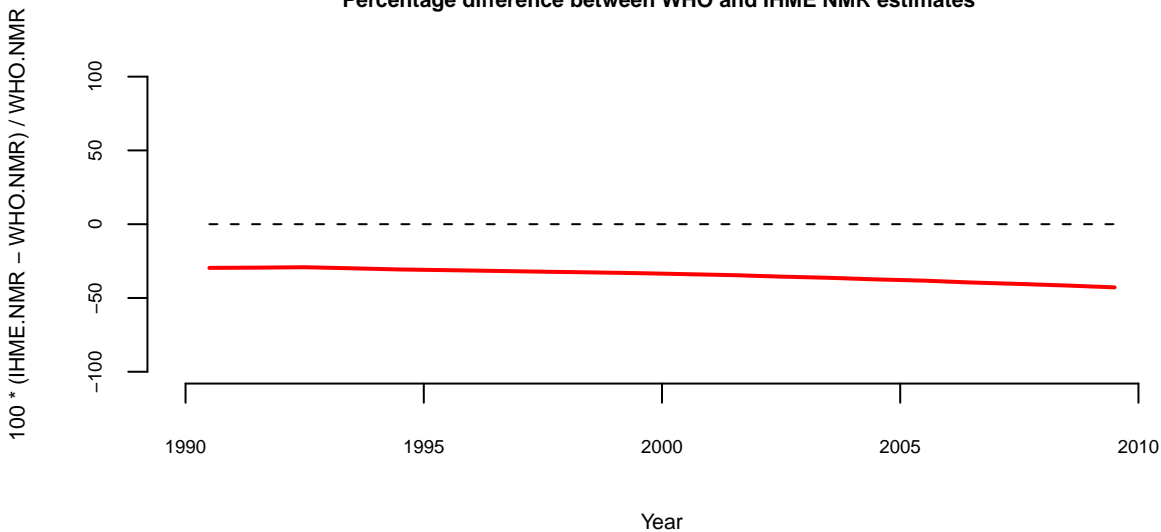

**Egypt**  
**Paired t-test: p-value = 0.10**

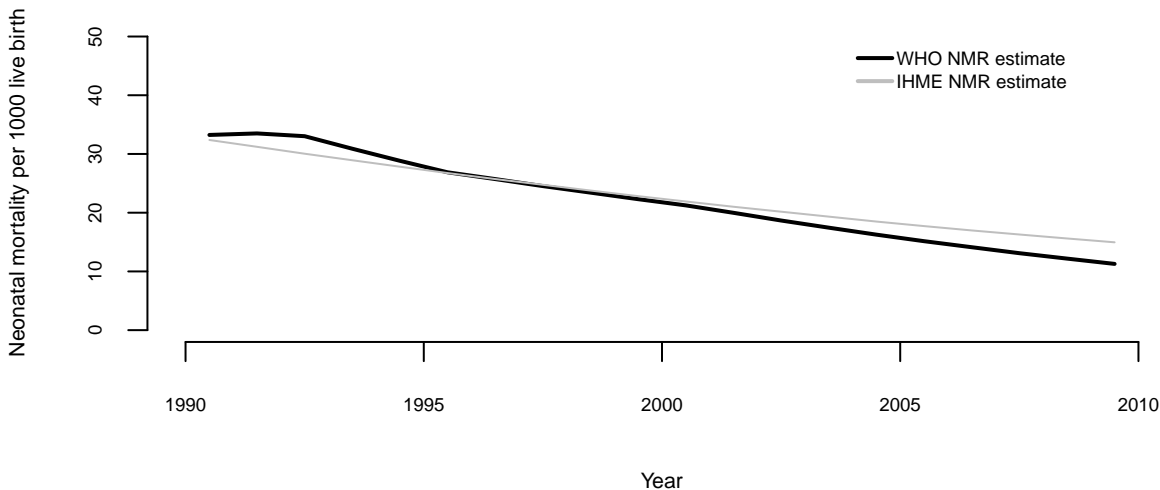

**Egypt**  
**Percentage difference between WHO and IHME NMR estimates**

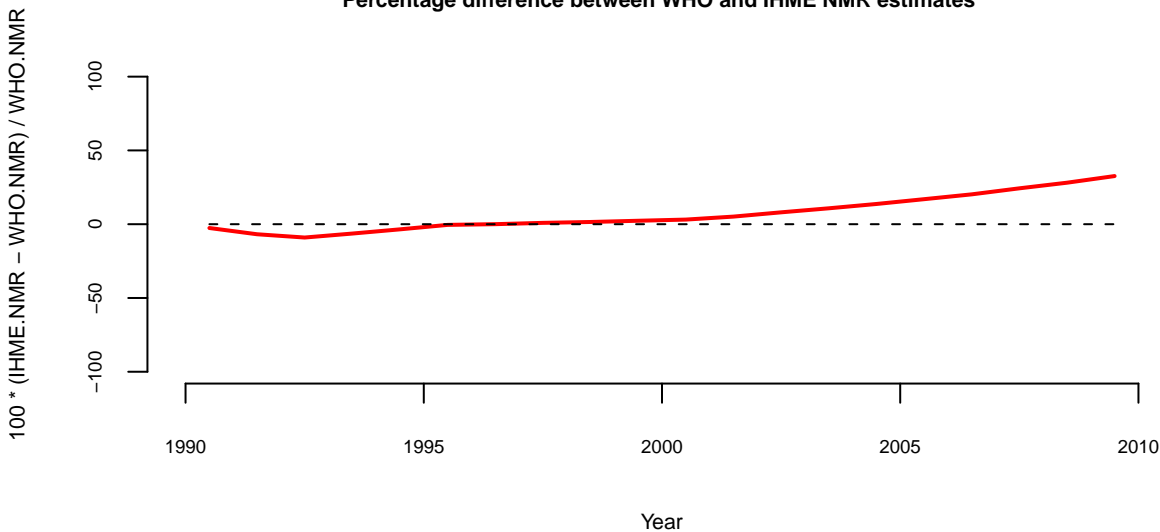

**EI Salvador**  
**Paired t-test: p-value = 2.1e-18**

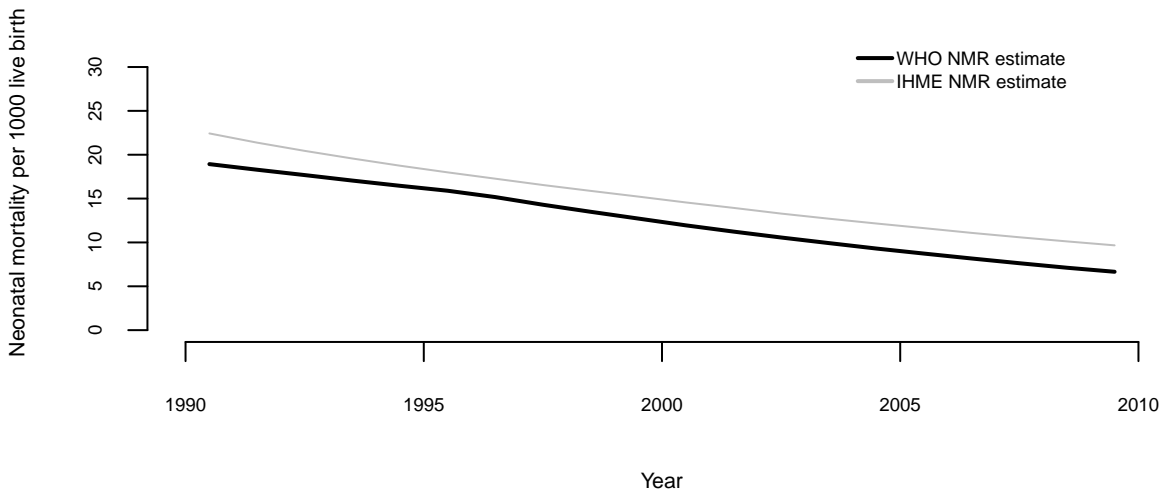

**EI Salvador**  
**Percentage difference between WHO and IHME NMR estimates**

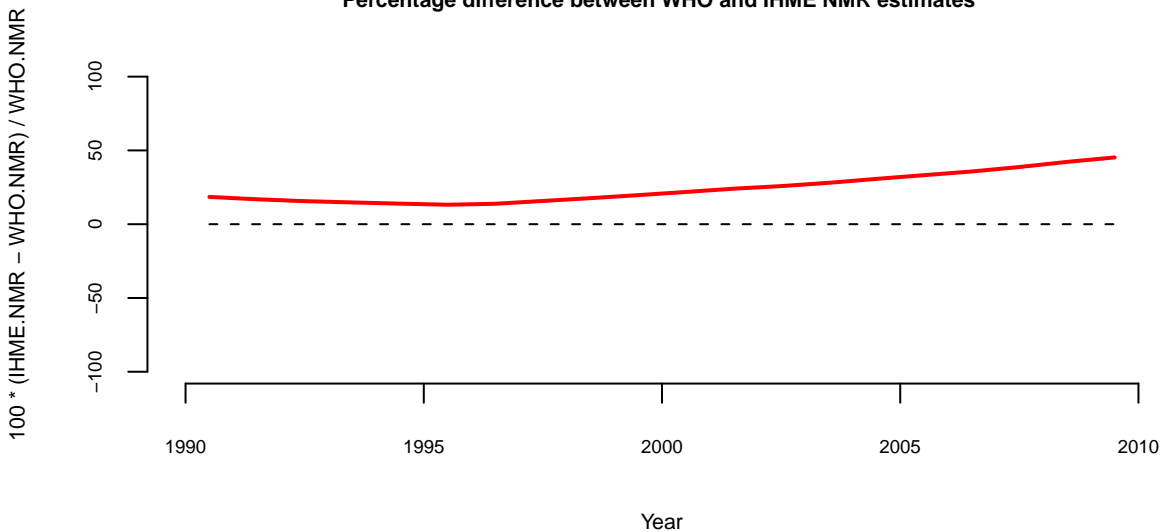

**Eritrea**  
**Paired t-test: p-value = 7.4e-09**

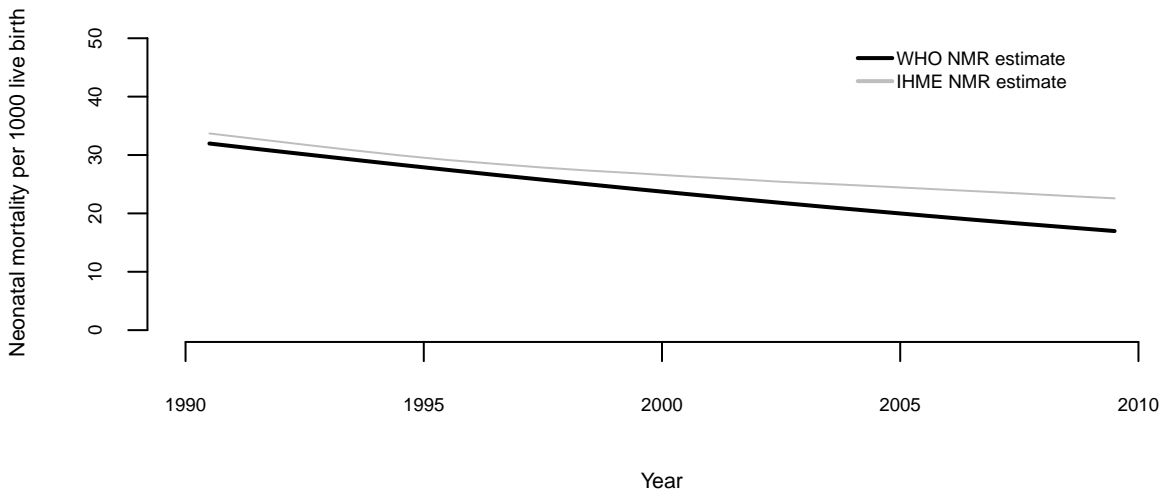

**Eritrea**  
**Percentage difference between WHO and IHME NMR estimates**

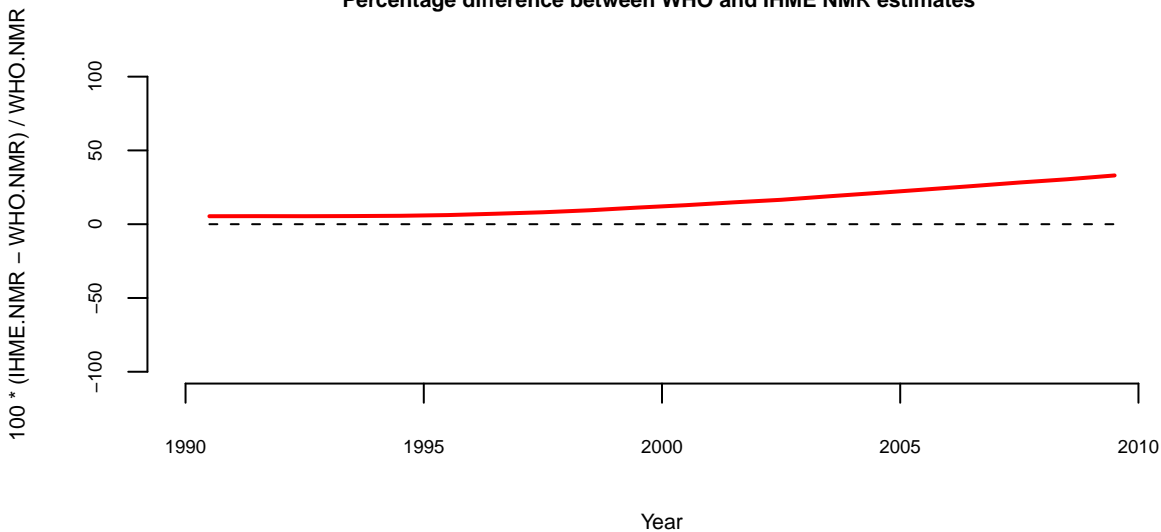

**Estonia**  
**Paired t-test: p-value = 0.00057**

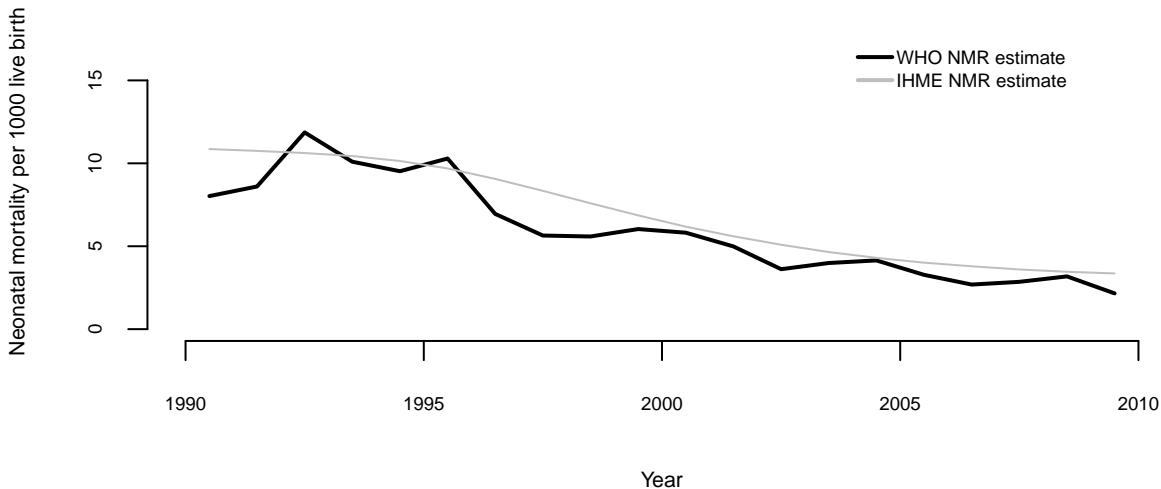

**Estonia**  
**Percentage difference between WHO and IHME NMR estimates**

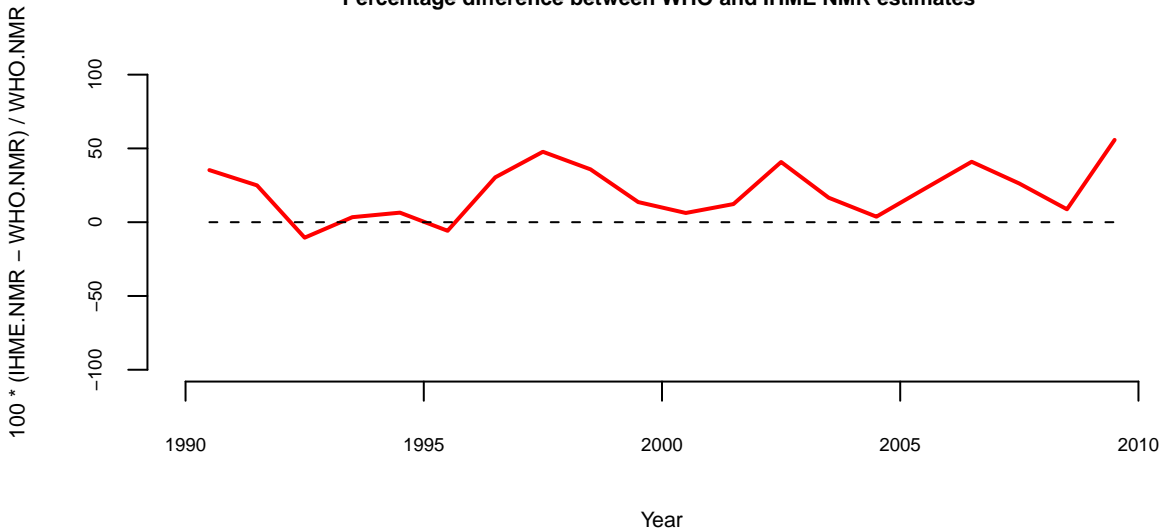

**Ethiopia**  
**Paired t-test: p-value = 8e-04**

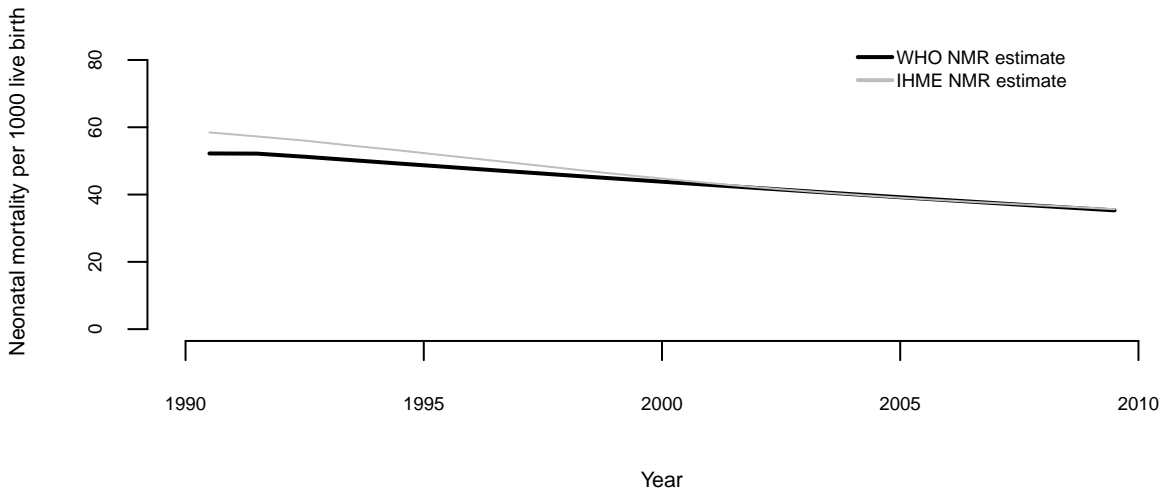

**Ethiopia**  
**Percentage difference between WHO and IHME NMR estimates**

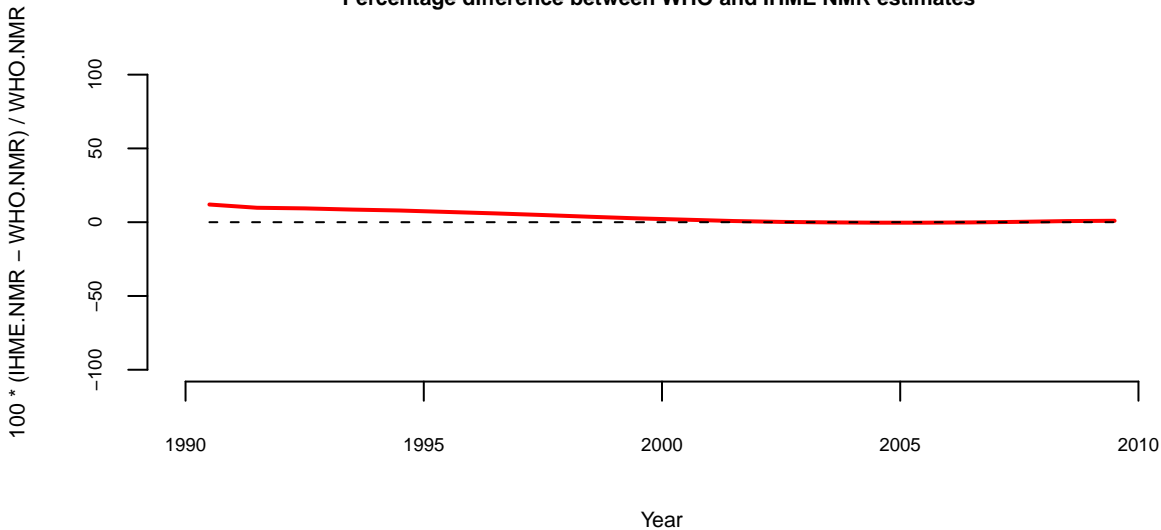

**Finland**  
**Paired t-test: p-value = 2e-05**

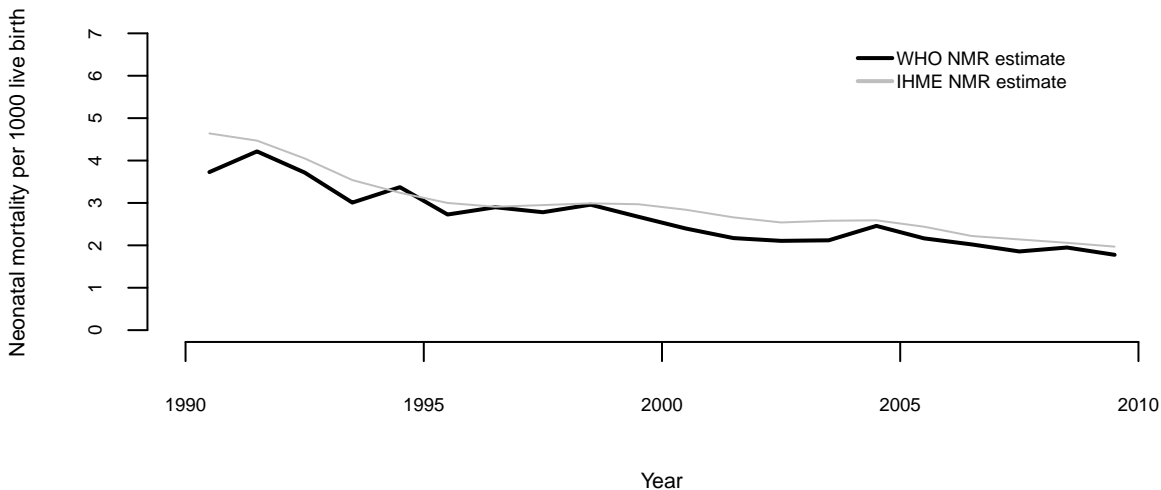

**Finland**  
**Percentage difference between WHO and IHME NMR estimates**

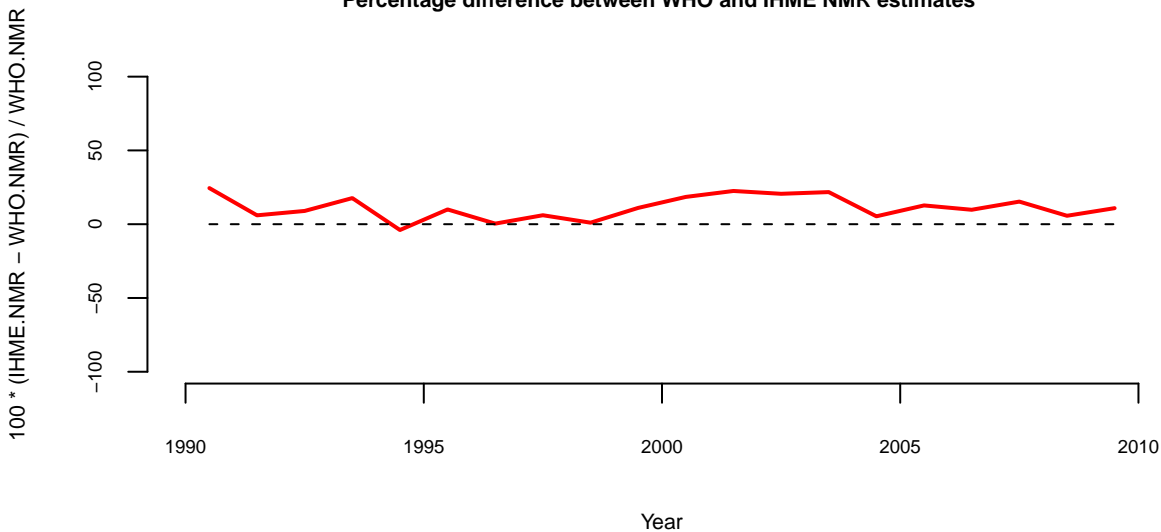

France  
Paired t-test: p-value = 0.0059

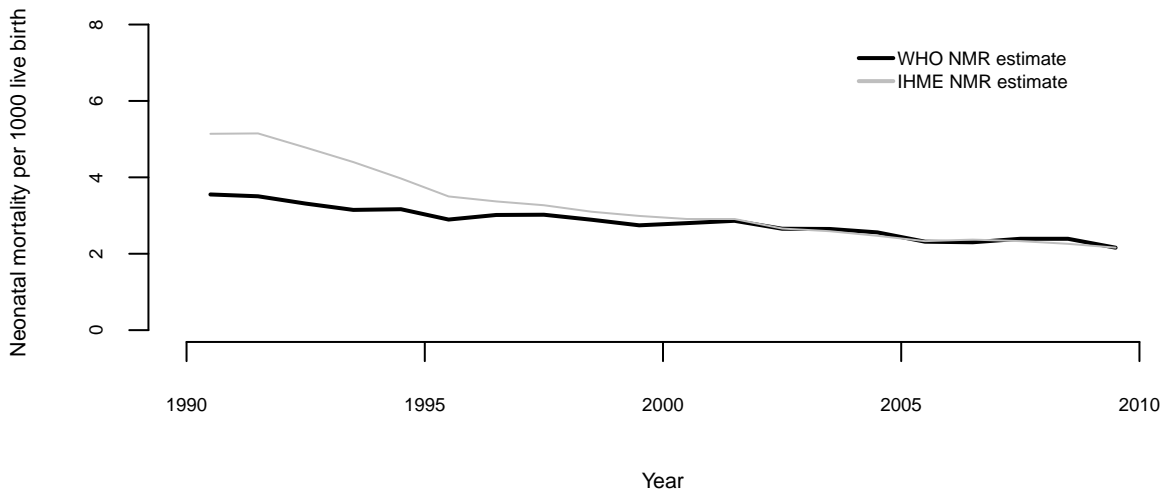

France  
Percentage difference between WHO and IHME NMR estimates

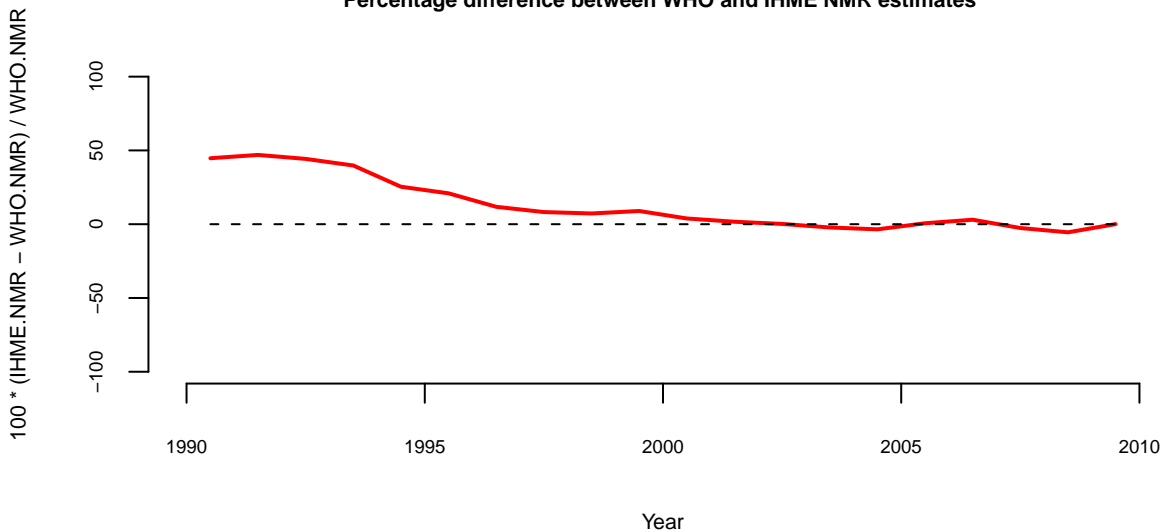

**Gabon**  
**Paired t-test: p-value = 2.6e-11**

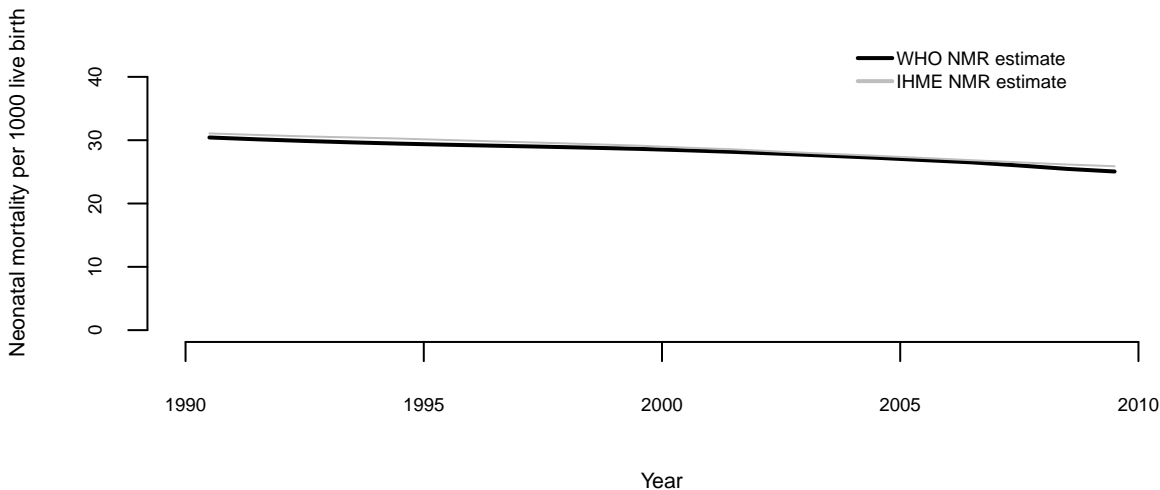

**Gabon**  
**Percentage difference between WHO and IHME NMR estimates**

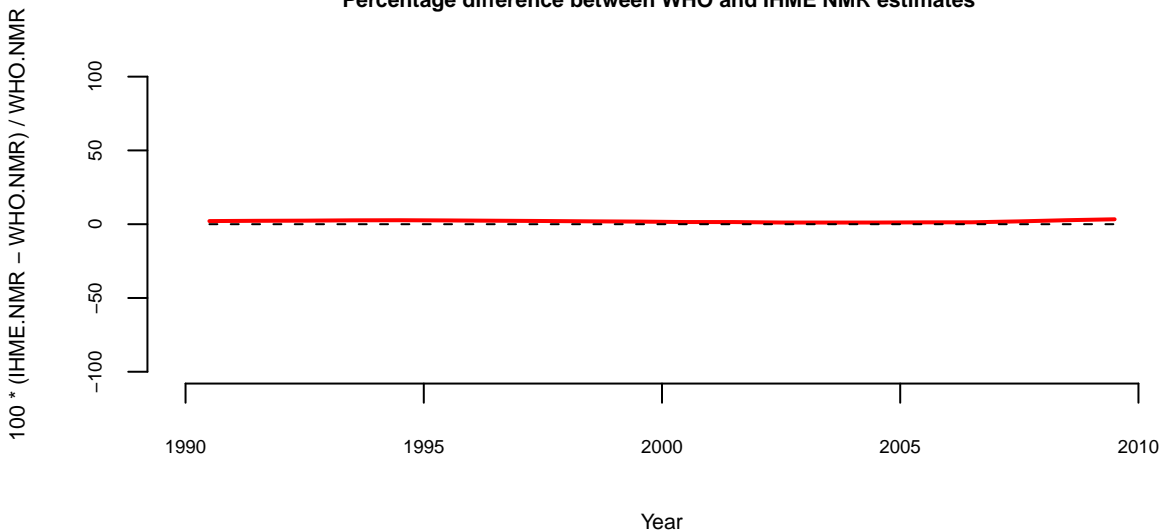

**Georgia**  
**Paired t-test: p-value = 4.6e-18**

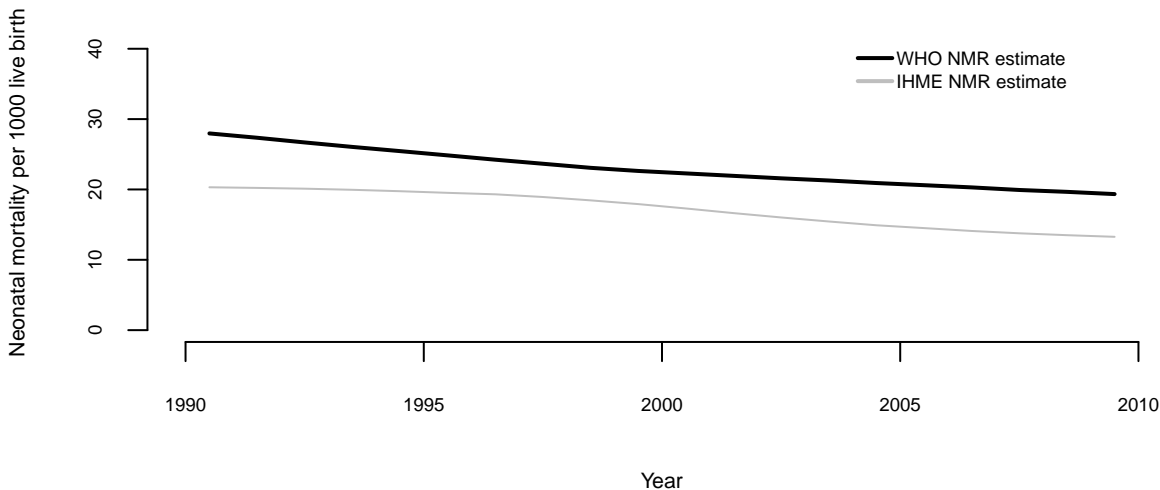

**Georgia**  
**Percentage difference between WHO and IHME NMR estimates**

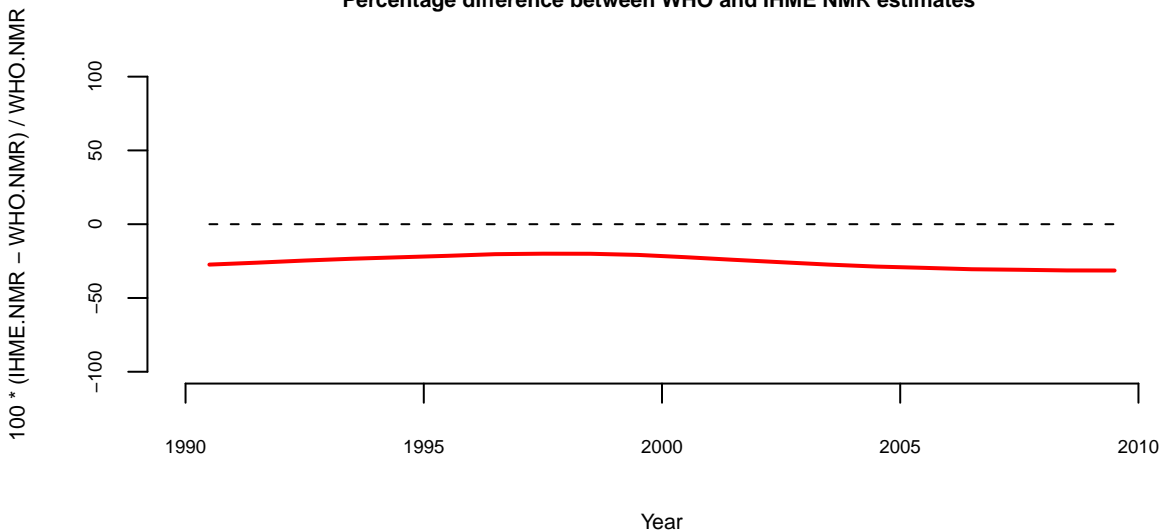

**Germany**  
**Paired t-test: p-value = 2.2e-06**

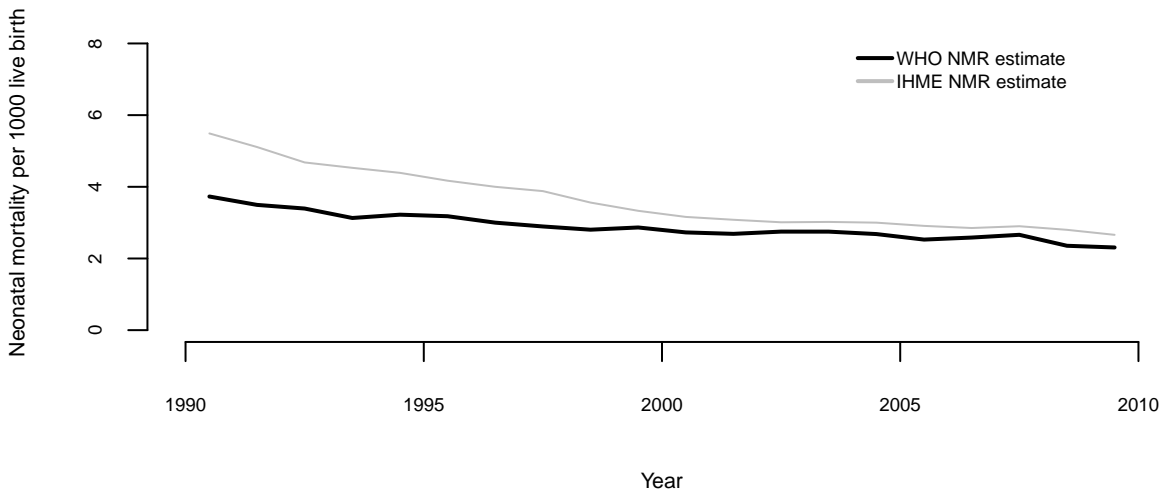

**Germany**  
**Percentage difference between WHO and IHME NMR estimates**

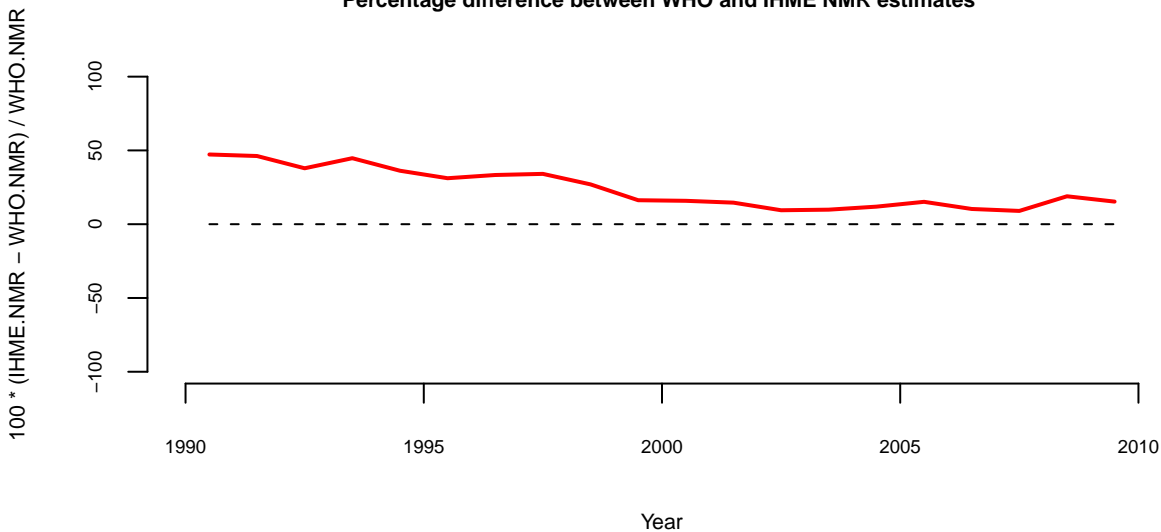

**Ghana**  
**Paired t-test: p-value = 0.091**

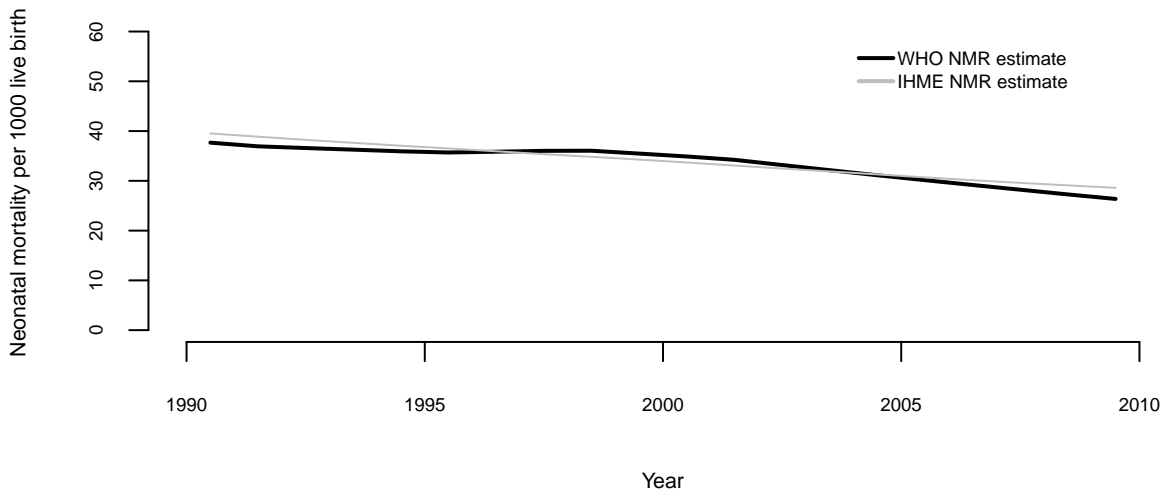

**Ghana**  
**Percentage difference between WHO and IHME NMR estimates**

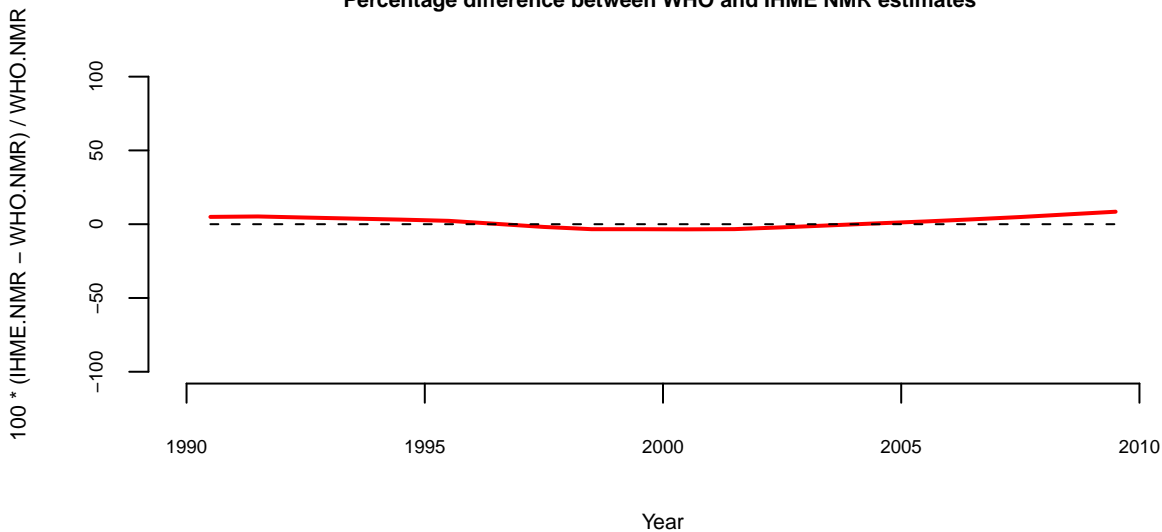

**Greece**  
**Paired t-test: p-value = 9.2e-09**

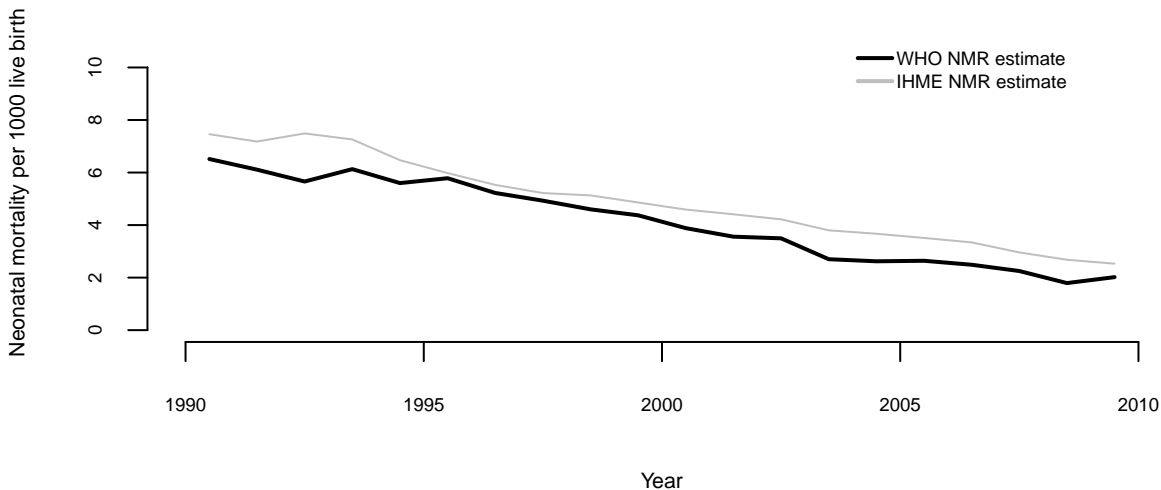

**Greece**  
**Percentage difference between WHO and IHME NMR estimates**

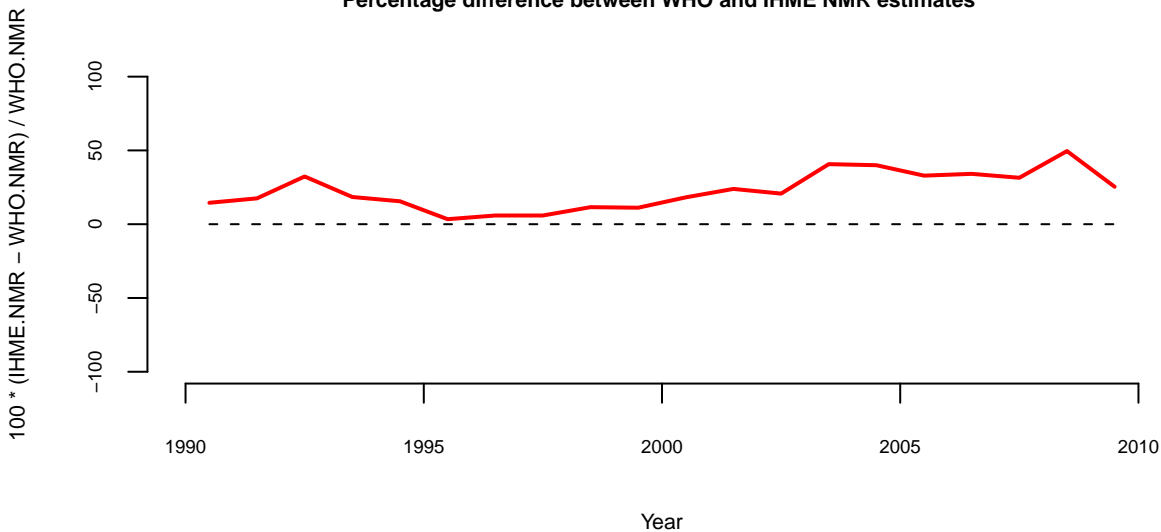

**Grenada**  
**Paired t-test: p-value = 0.041**

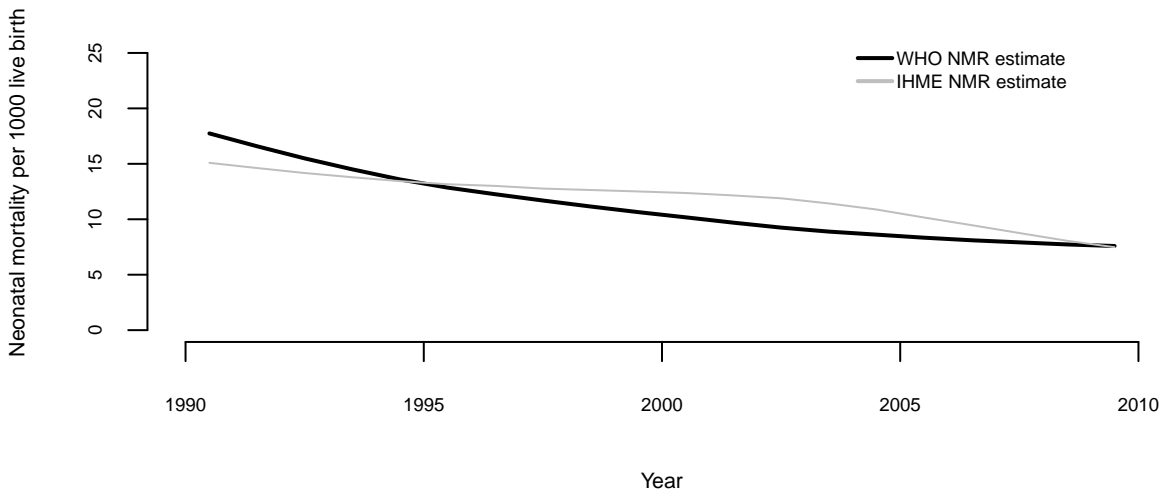

**Grenada**  
**Percentage difference between WHO and IHME NMR estimates**

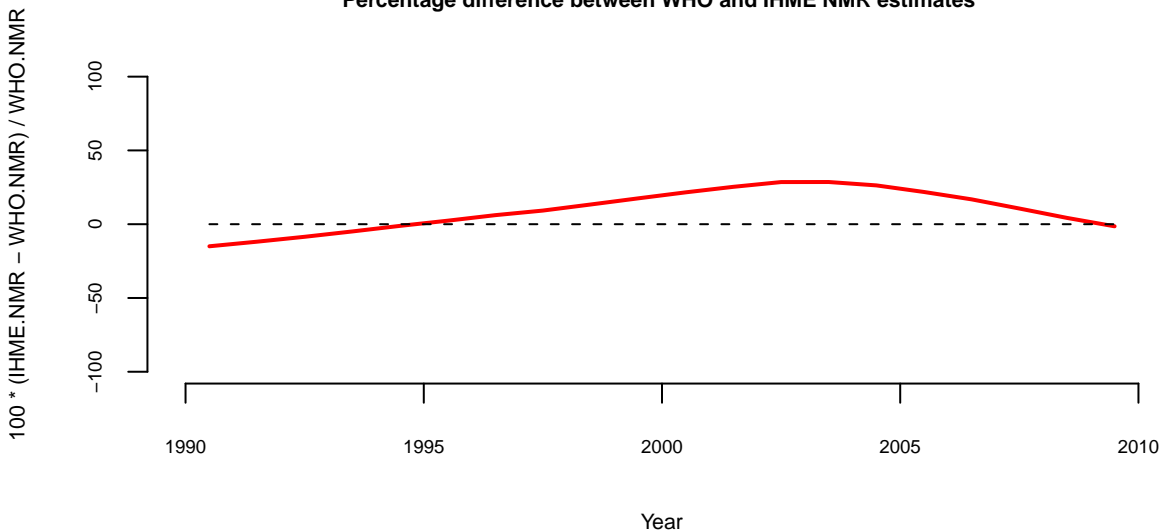

**Guatemala**  
**Paired t-test: p-value = 9.8e-17**

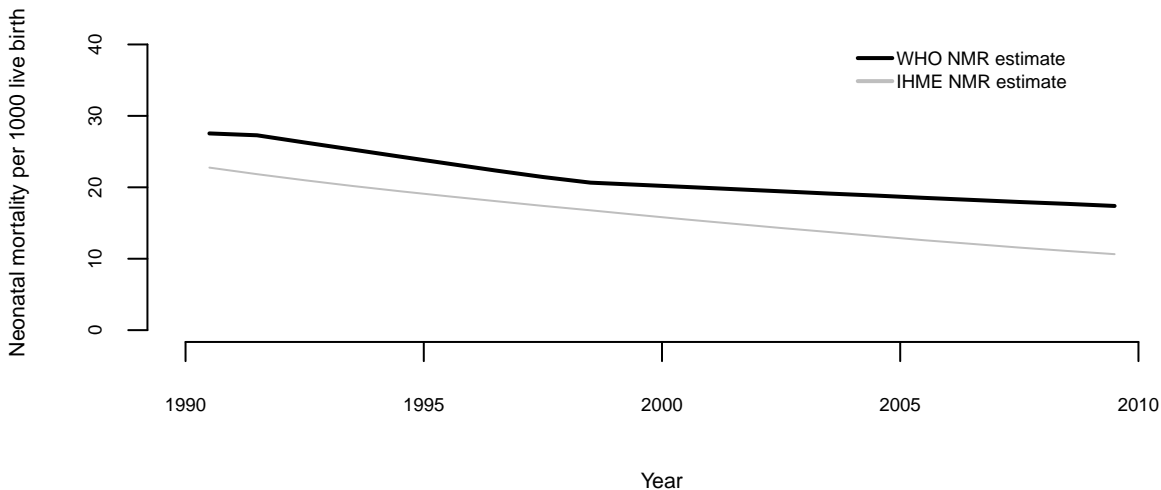

**Guatemala**  
**Percentage difference between WHO and IHME NMR estimates**

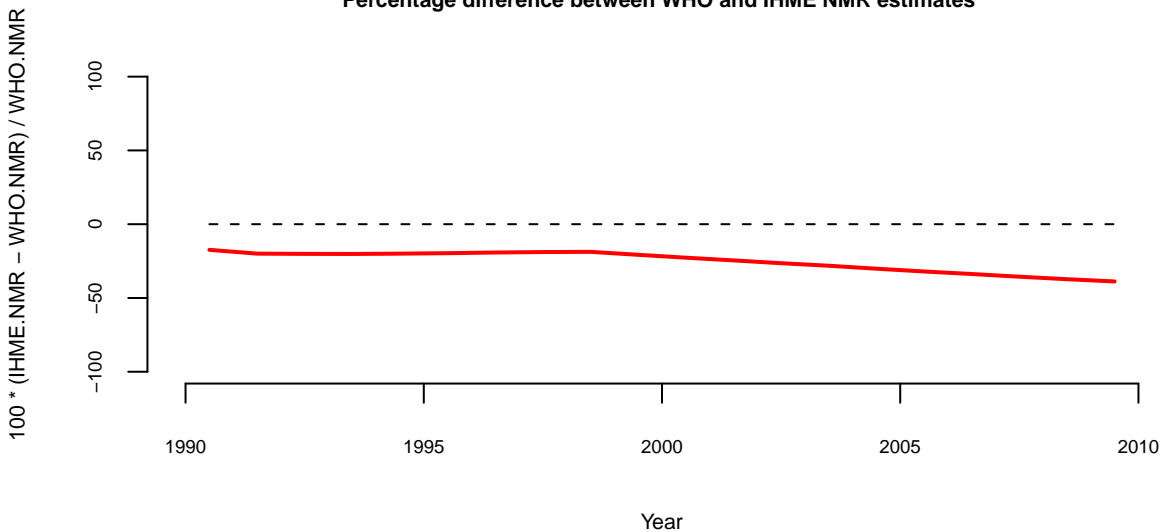

**Guinea**  
**Paired t-test: p-value = 0.0013**

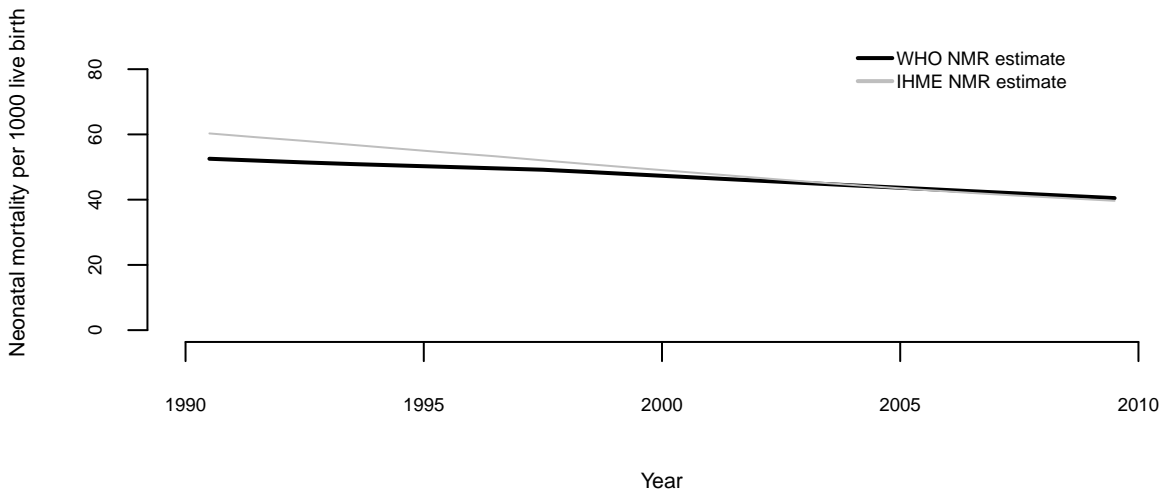

**Guinea**  
**Percentage difference between WHO and IHME NMR estimates**

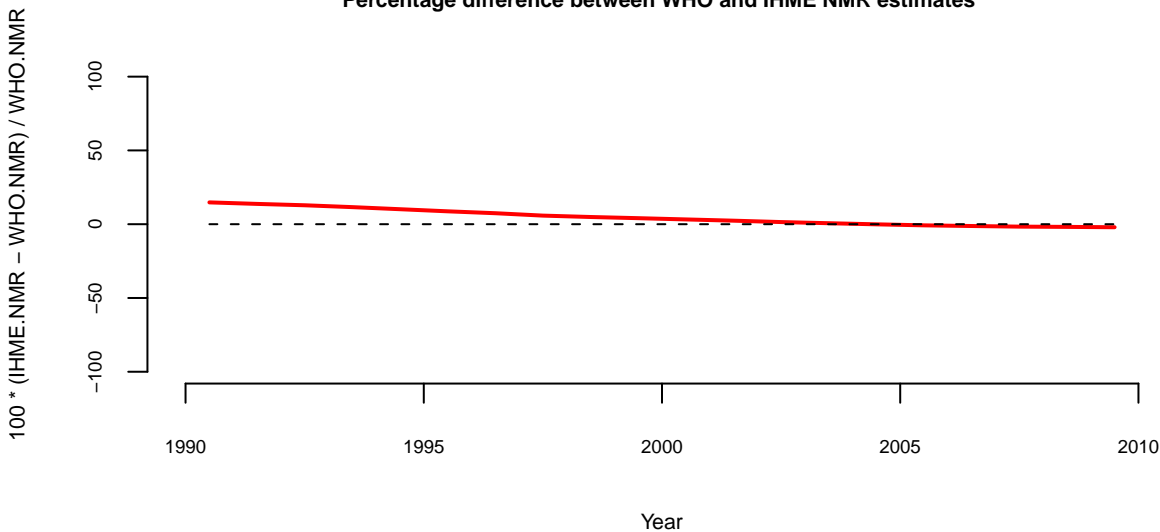

**Guyana**  
**Paired t-test: p-value = 0.00033**

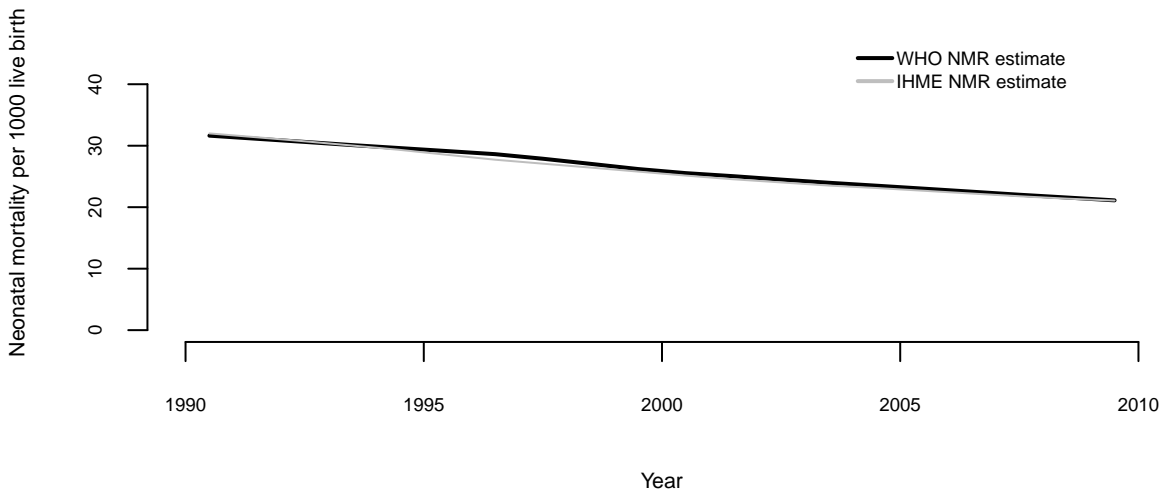

**Guyana**  
**Percentage difference between WHO and IHME NMR estimates**

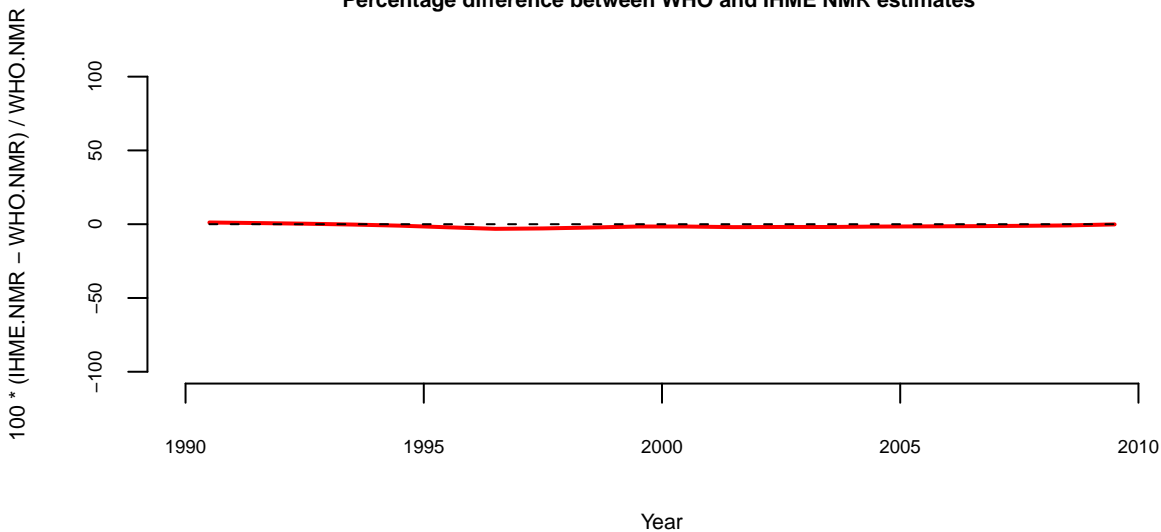

Haiti  
Paired t-test: p-value = 0.24

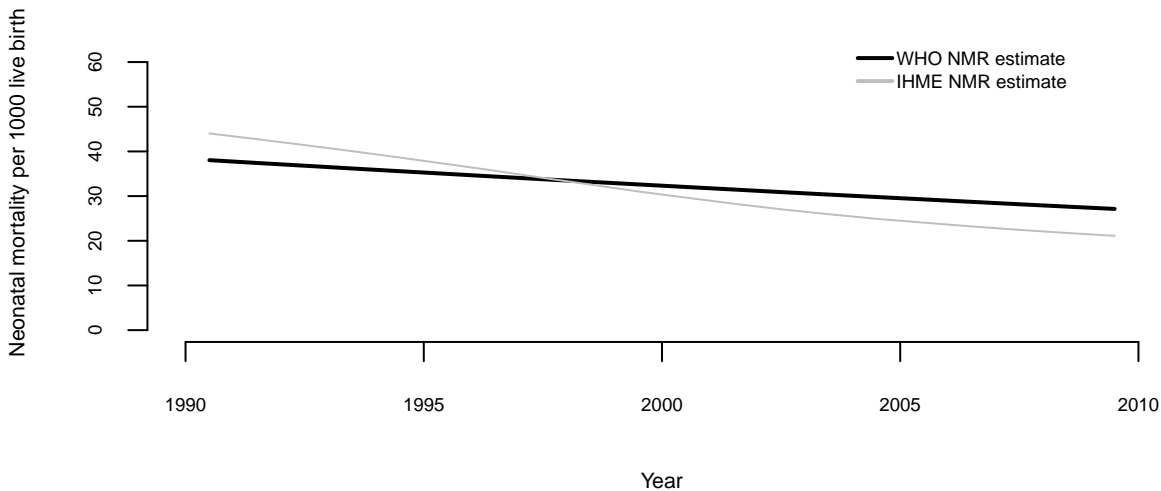

Haiti  
Percentage difference between WHO and IHME NMR estimates

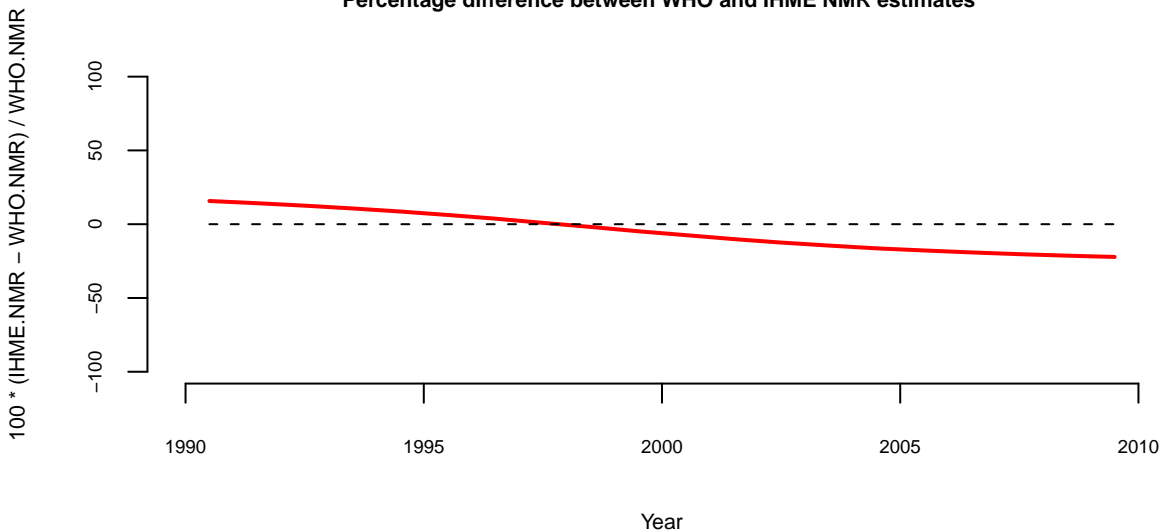

**Honduras**  
**Paired t-test: p-value = 0.00039**

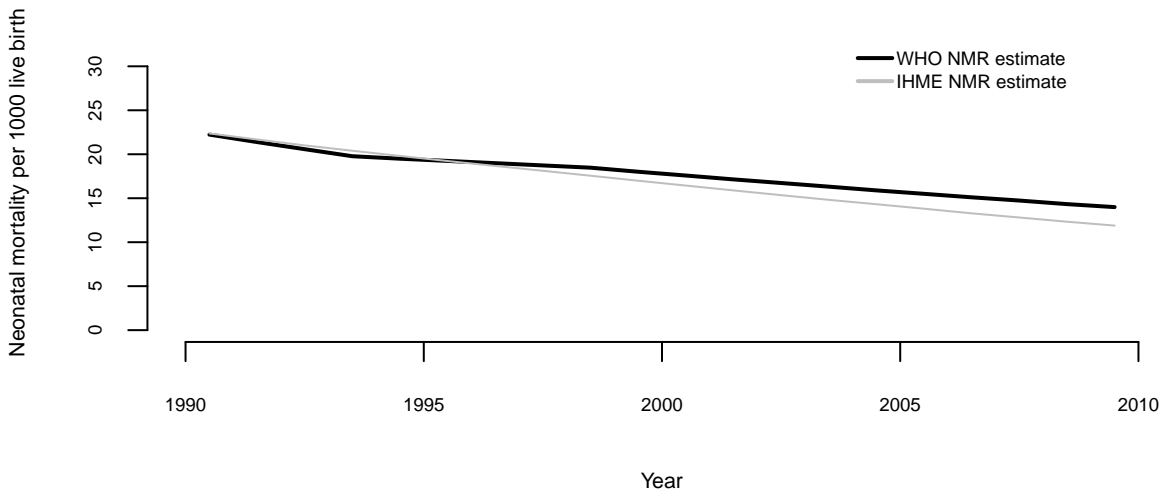

**Honduras**  
**Percentage difference between WHO and IHME NMR estimates**

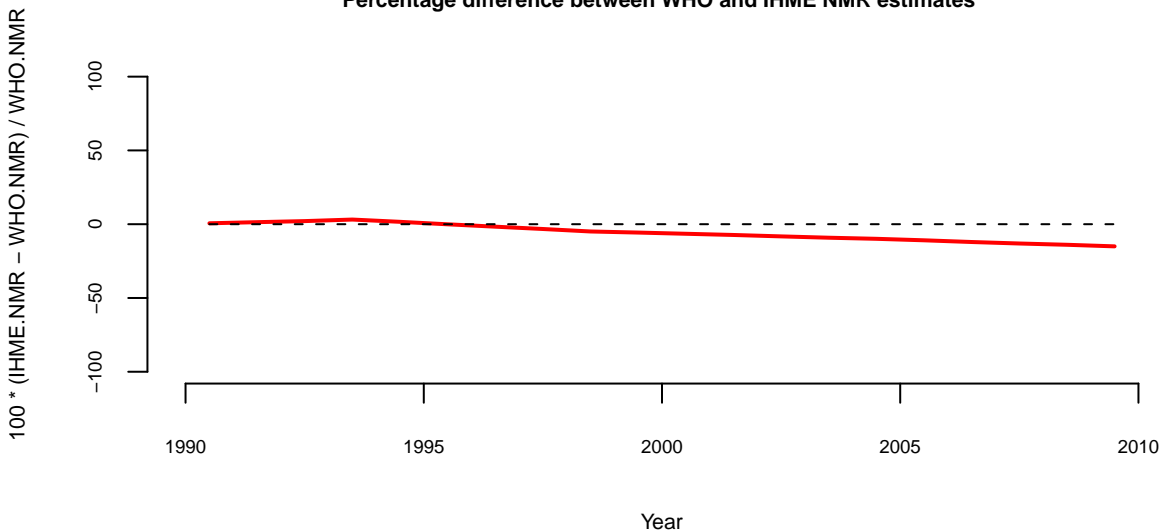

**Hungary**  
**Paired t-test: p-value = 5.7e-06**

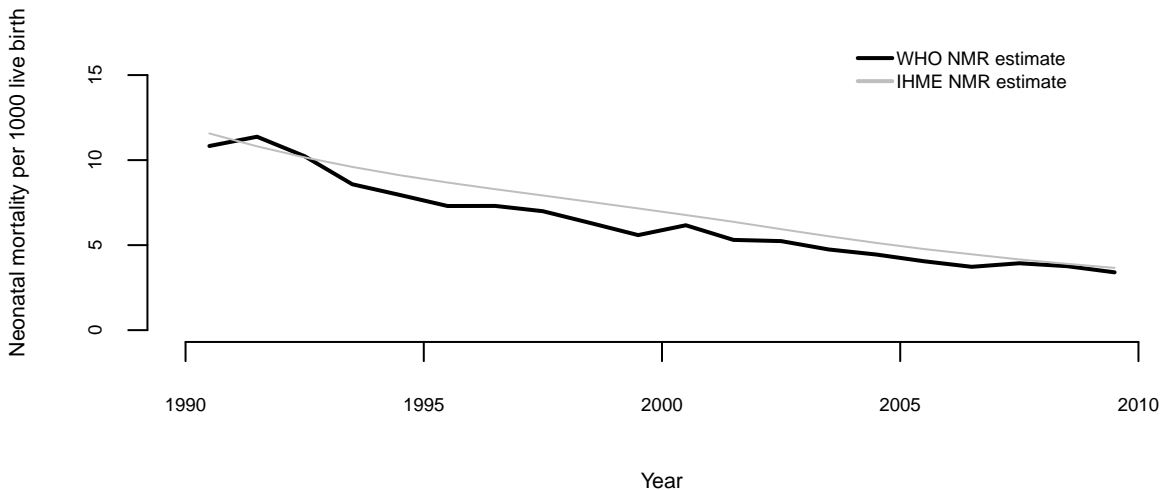

**Hungary**  
**Percentage difference between WHO and IHME NMR estimates**

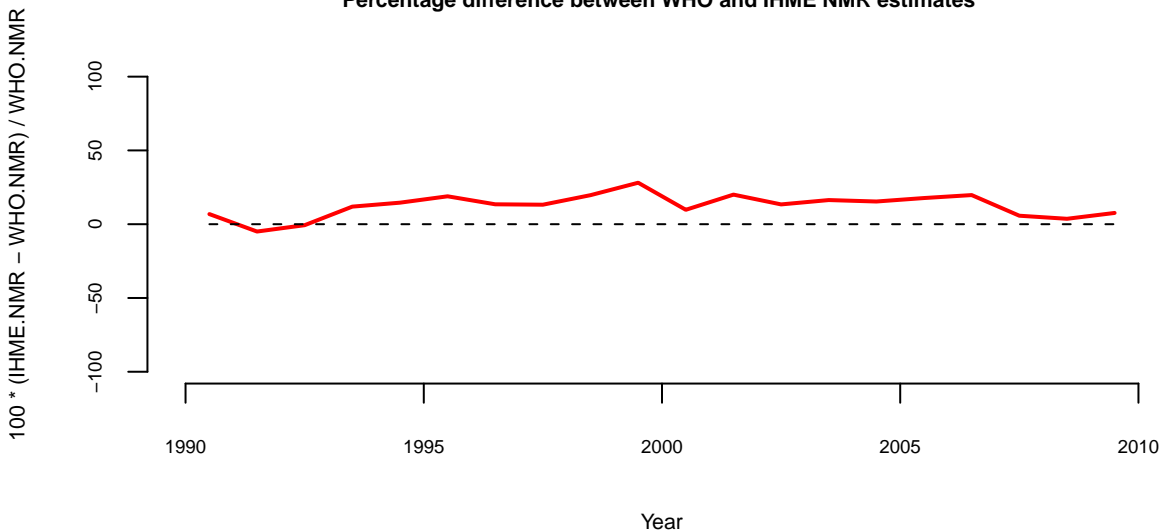

**Iceland**  
**Paired t-test: p-value = 0.00014**

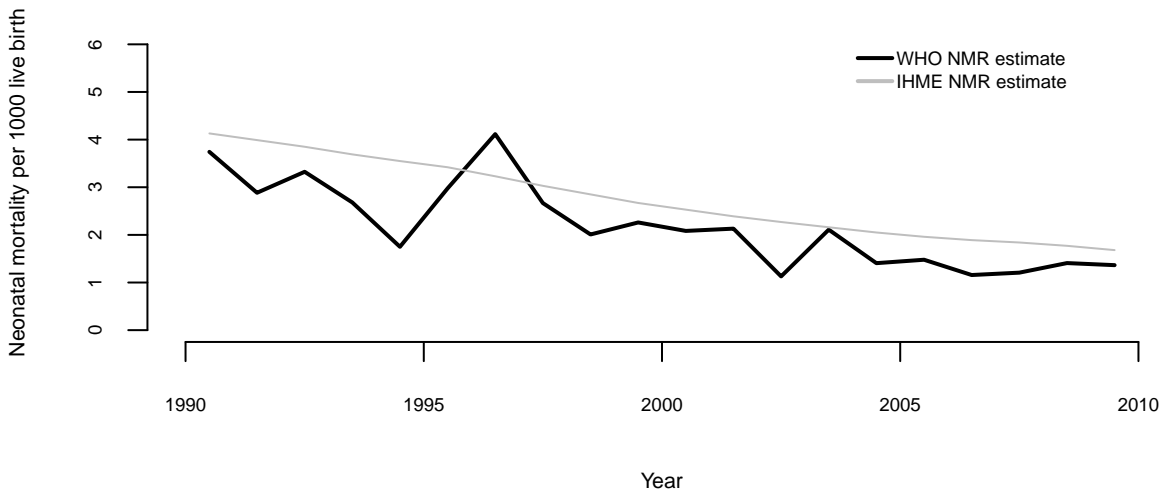

**Iceland**  
**Percentage difference between WHO and IHME NMR estimates**

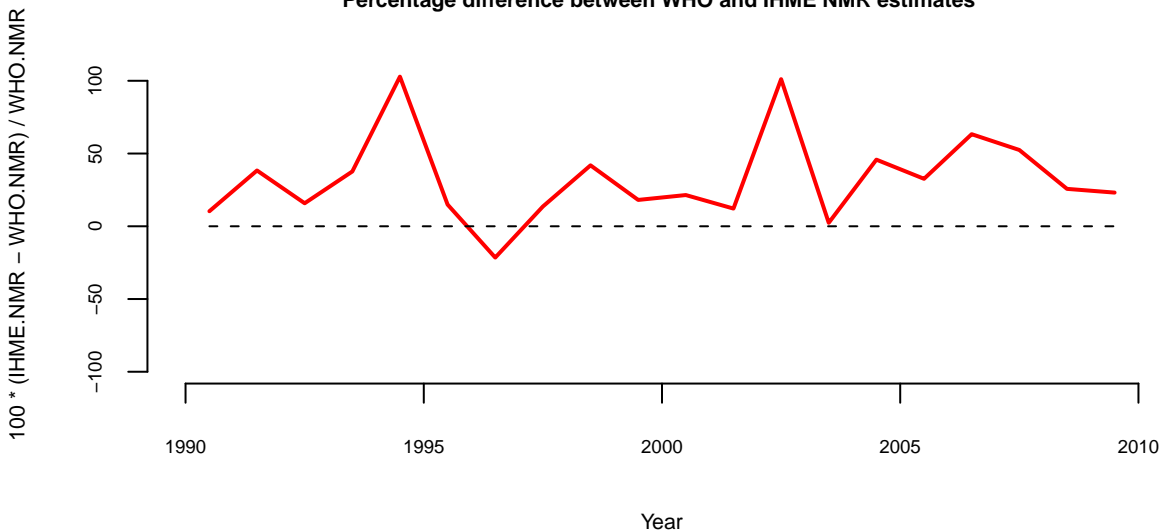

**India**  
**Paired t-test: p-value = 2.2e-05**

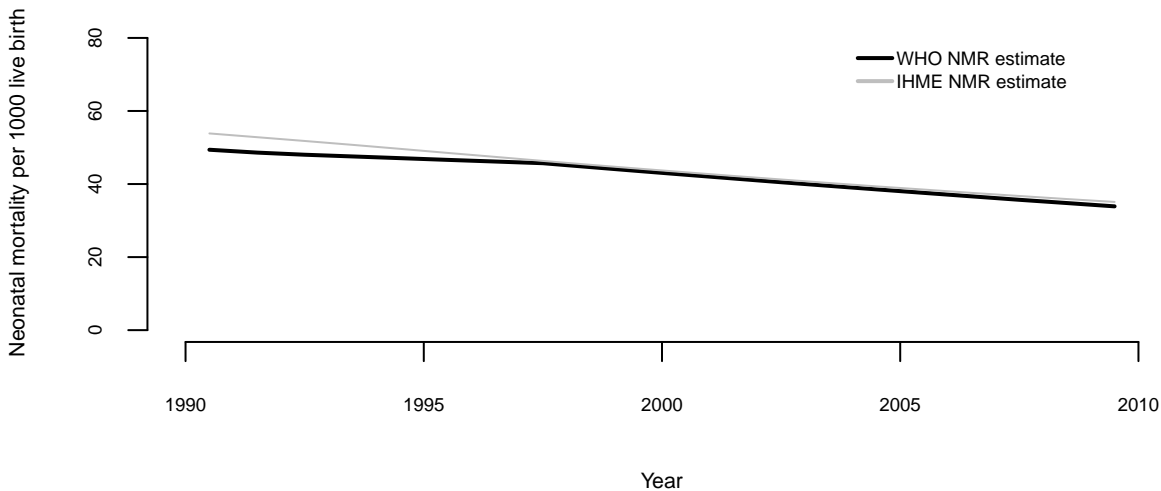

**India**  
**Percentage difference between WHO and IHME NMR estimates**

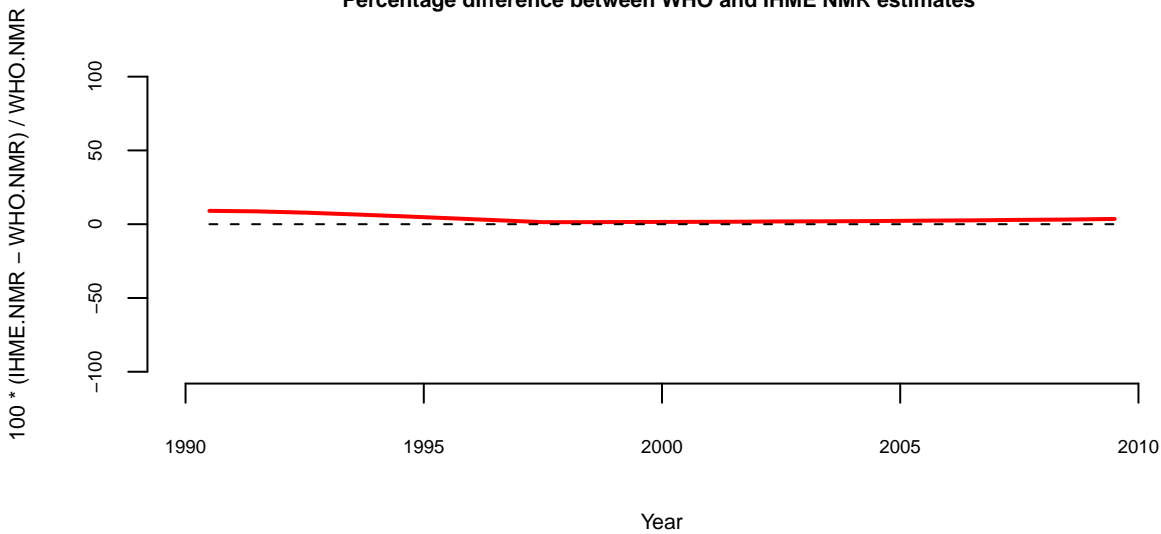

**Indonesia**  
**Paired t-test: p-value = 2.0e-09**

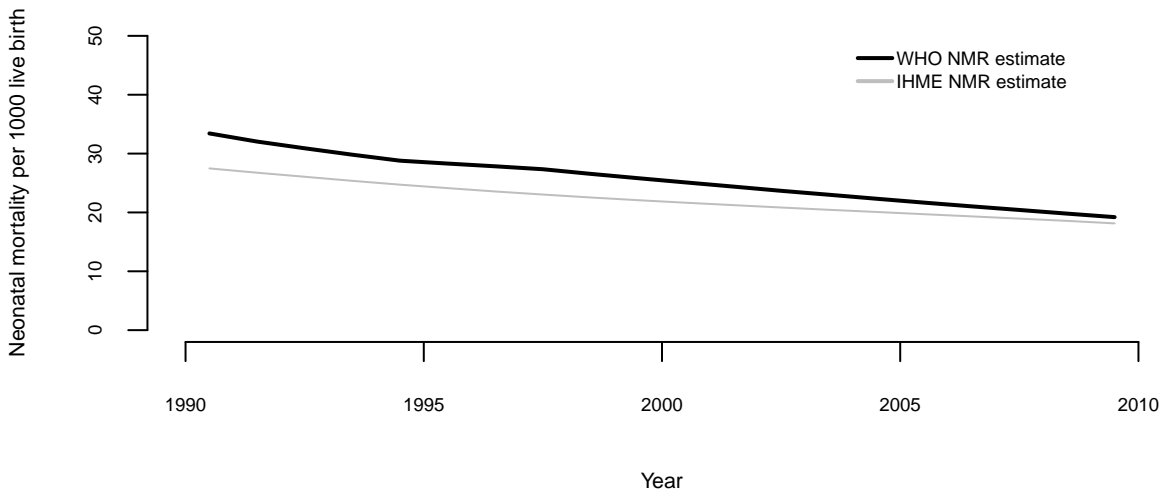

**Indonesia**  
**Percentage difference between WHO and IHME NMR estimates**

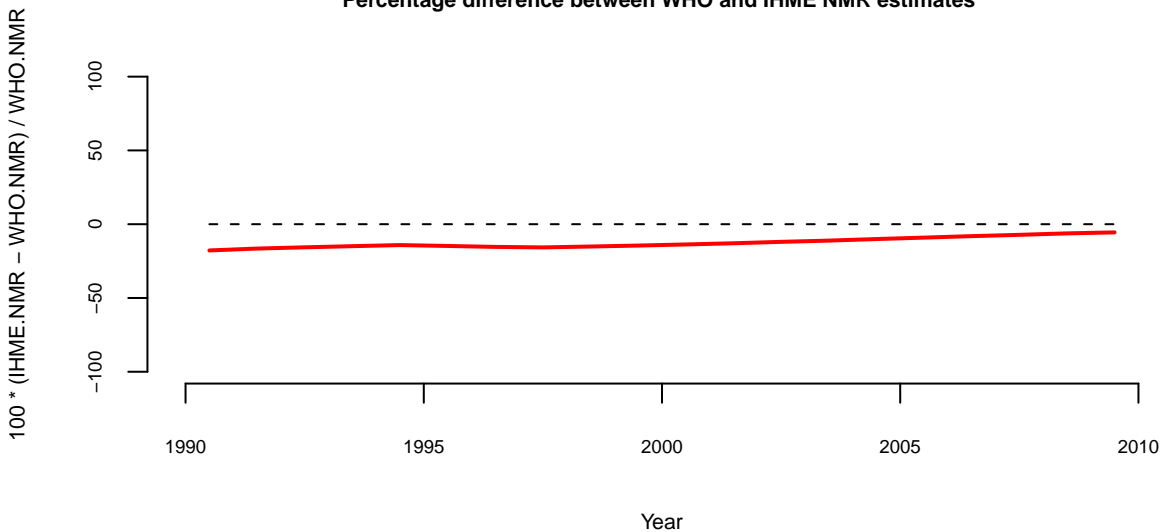

Iran (Islamic Republic of)  
Paired t-test: p-value = 0.19

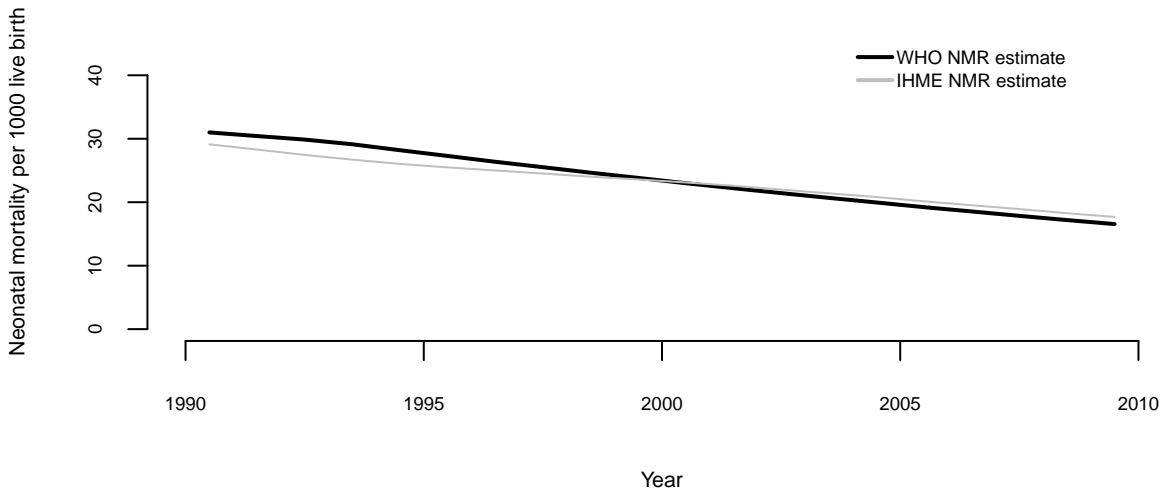

Iran (Islamic Republic of)  
Percentage difference between WHO and IHME NMR estimates

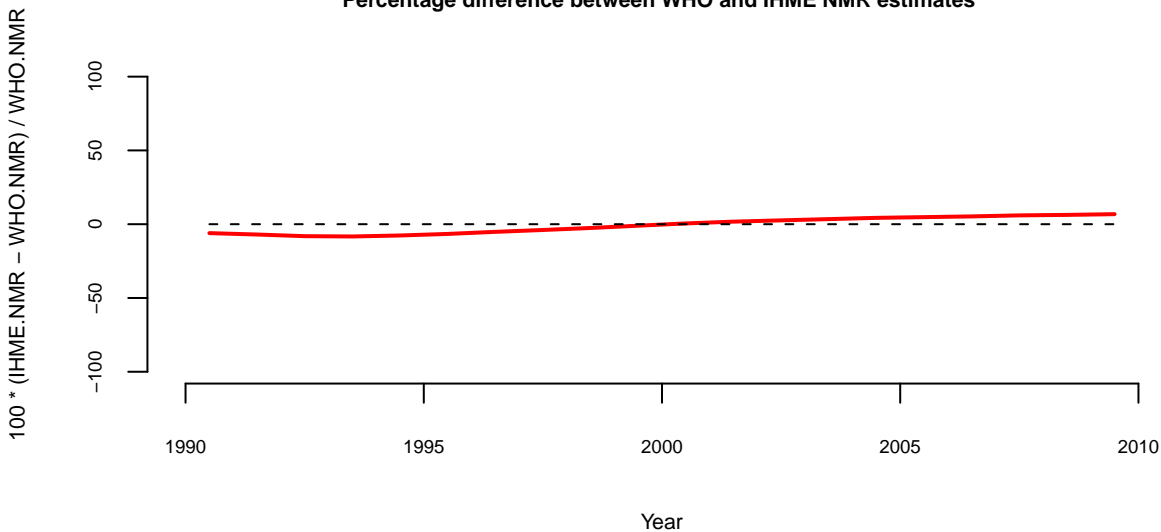

Iraq  
Paired t-test: p-value = 0.00054

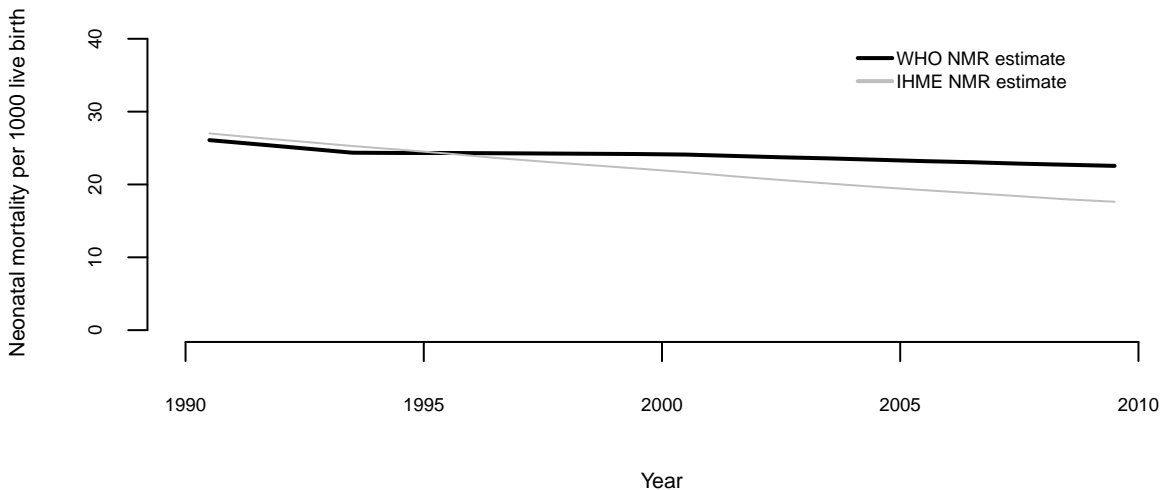

Iraq  
Percentage difference between WHO and IHME NMR estimates

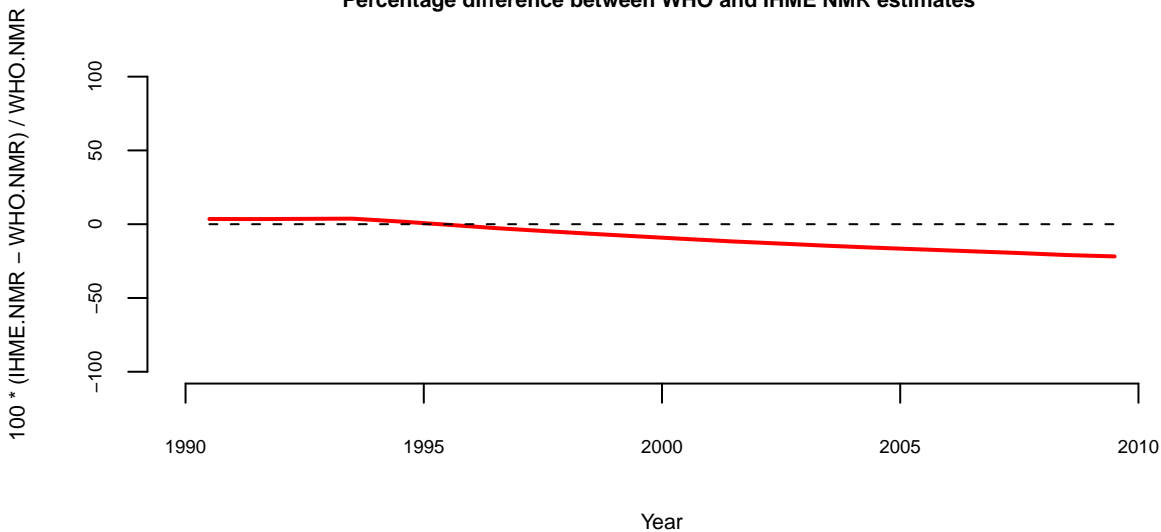

**Ireland**  
**Paired t-test: p-value = 0.00029**

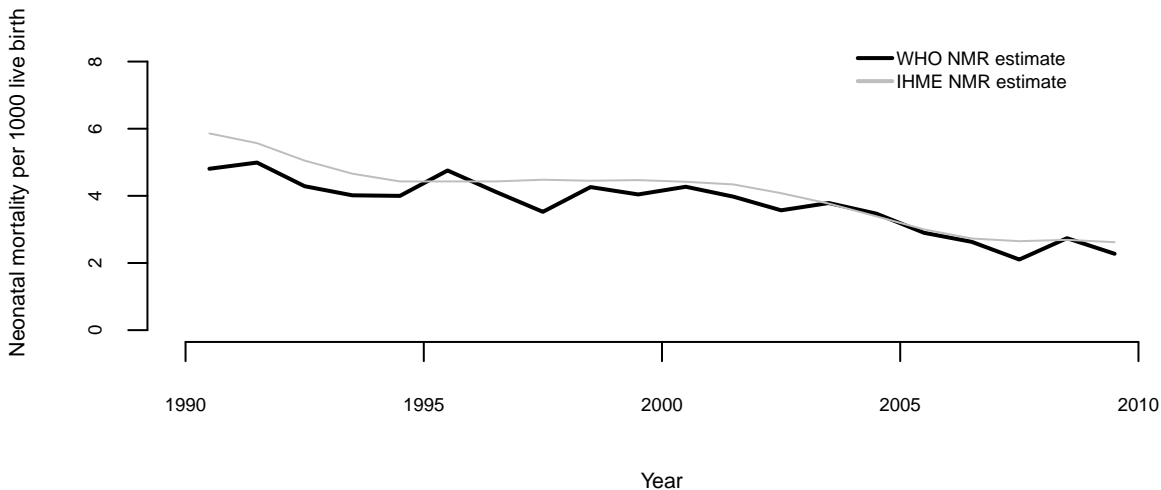

**Ireland**  
**Percentage difference between WHO and IHME NMR estimates**

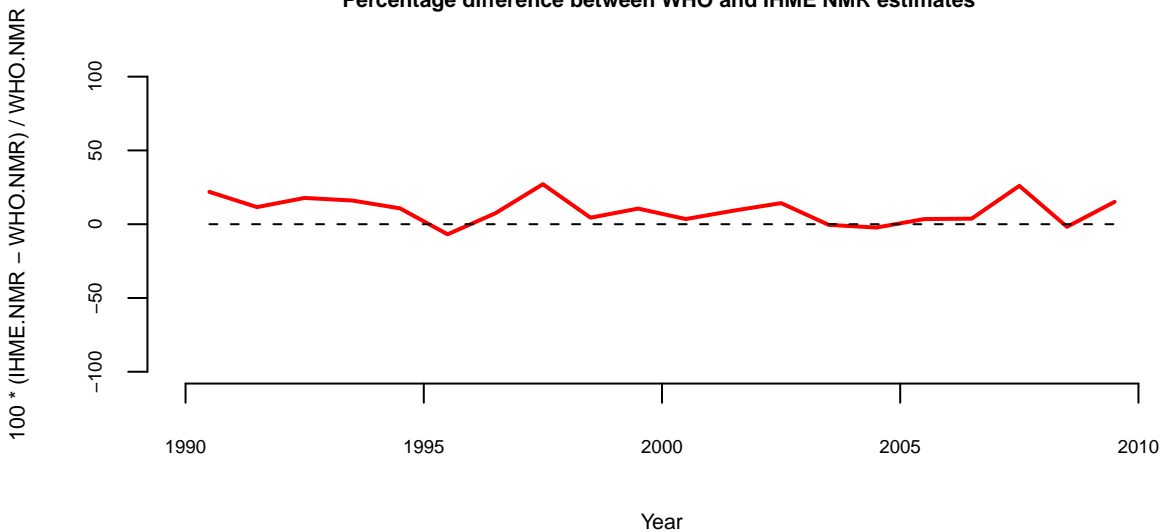

**Israel**  
**Paired t-test: p-value = 8.7e-10**

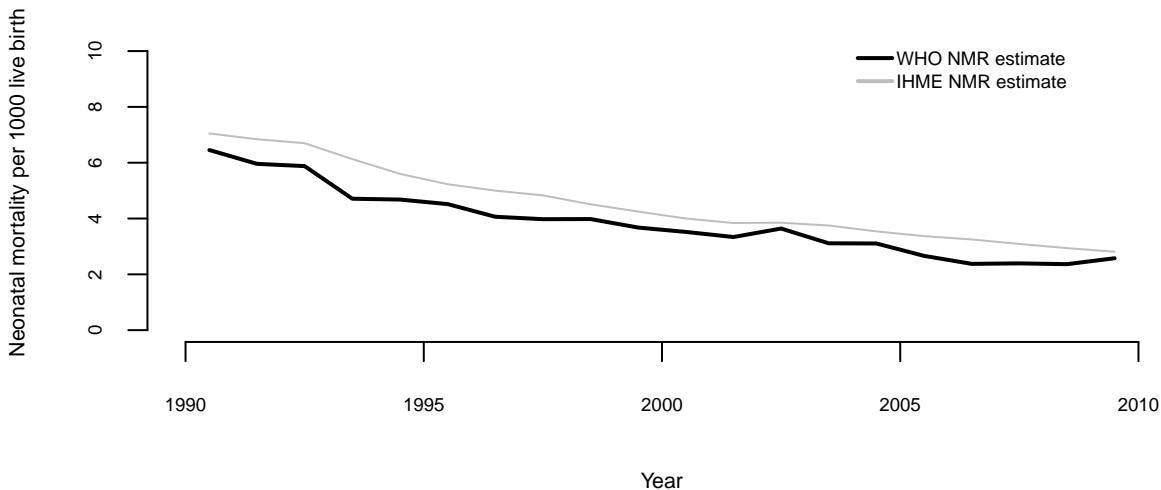

**Israel**  
**Percentage difference between WHO and IHME NMR estimates**

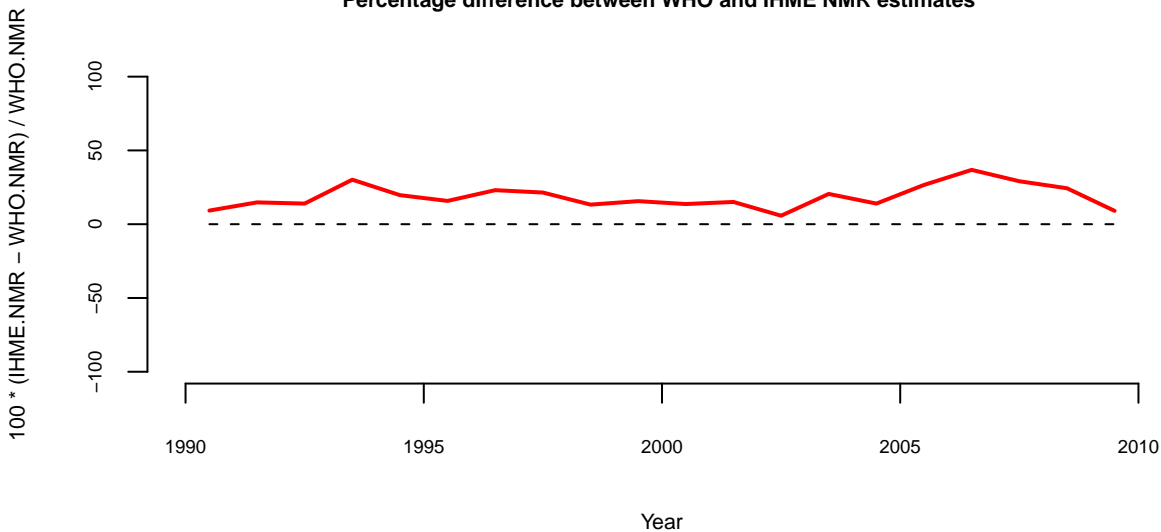

Italy  
Paired t-test: p-value = 2.4e-07

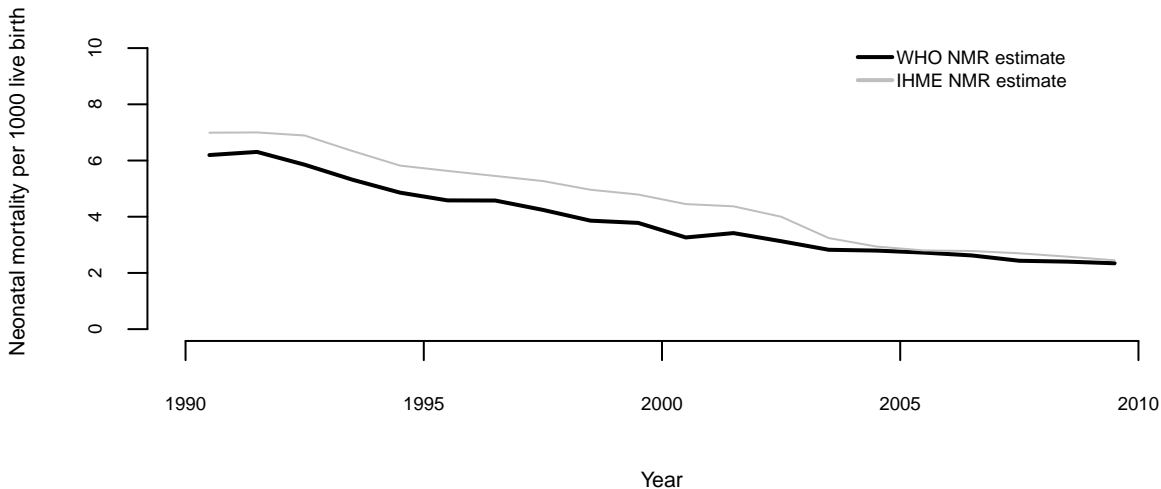

Italy  
Percentage difference between WHO and IHME NMR estimates

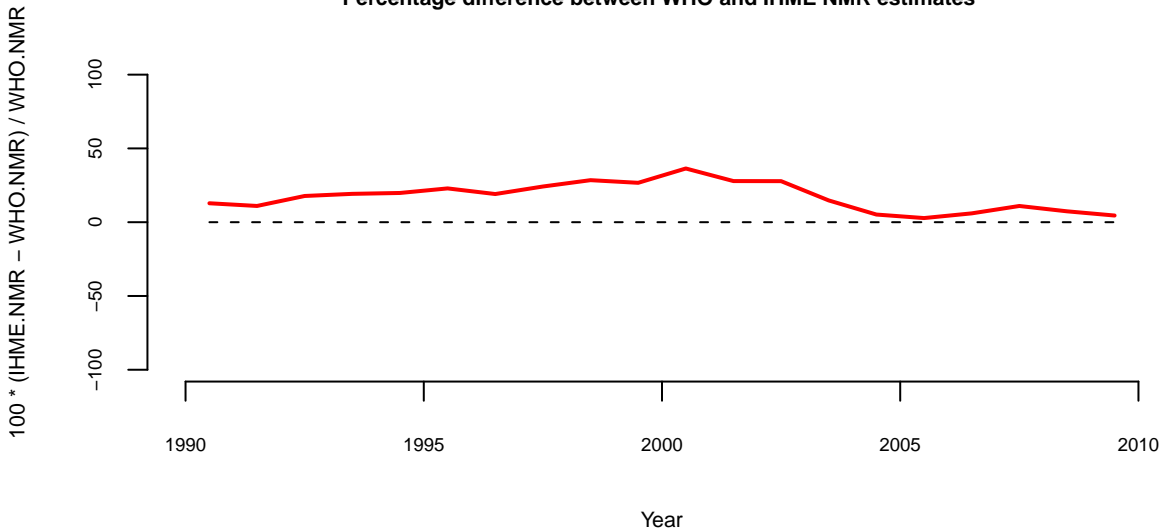

**Jamaica**  
**Paired t-test: p-value = 0.00093**

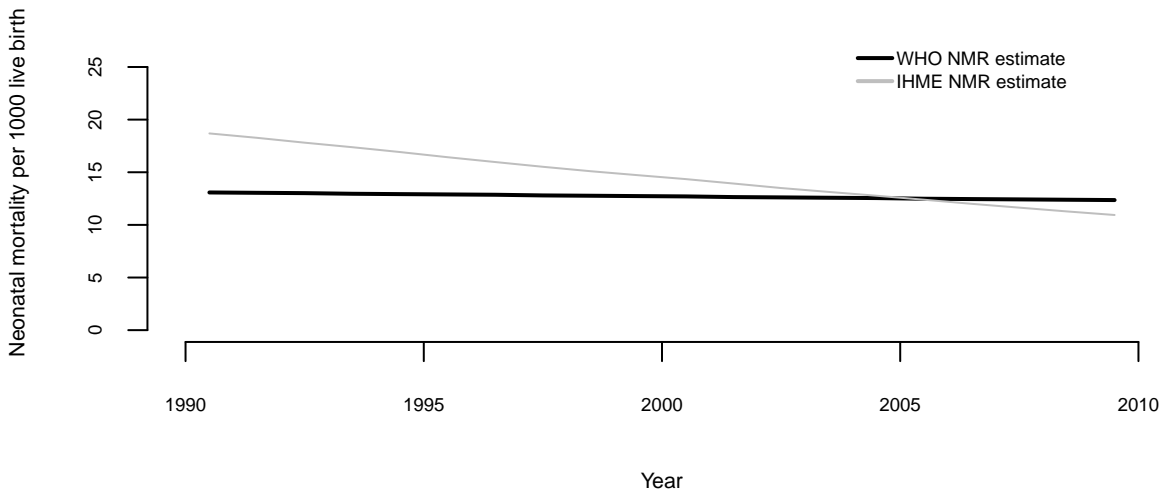

**Jamaica**  
**Percentage difference between WHO and IHME NMR estimates**

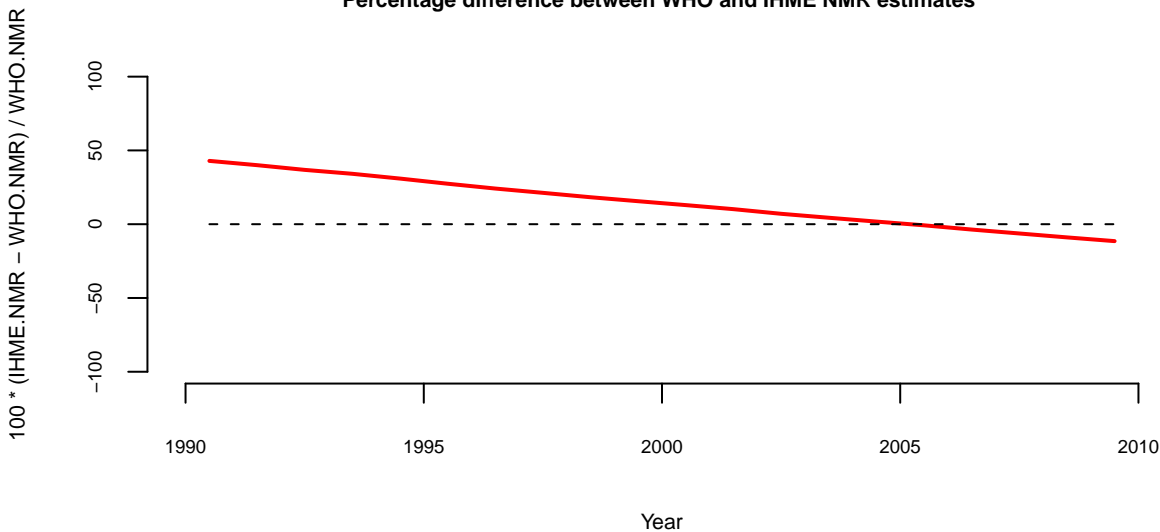

**Japan**  
**Paired t-test: p-value = 7.4e-09**

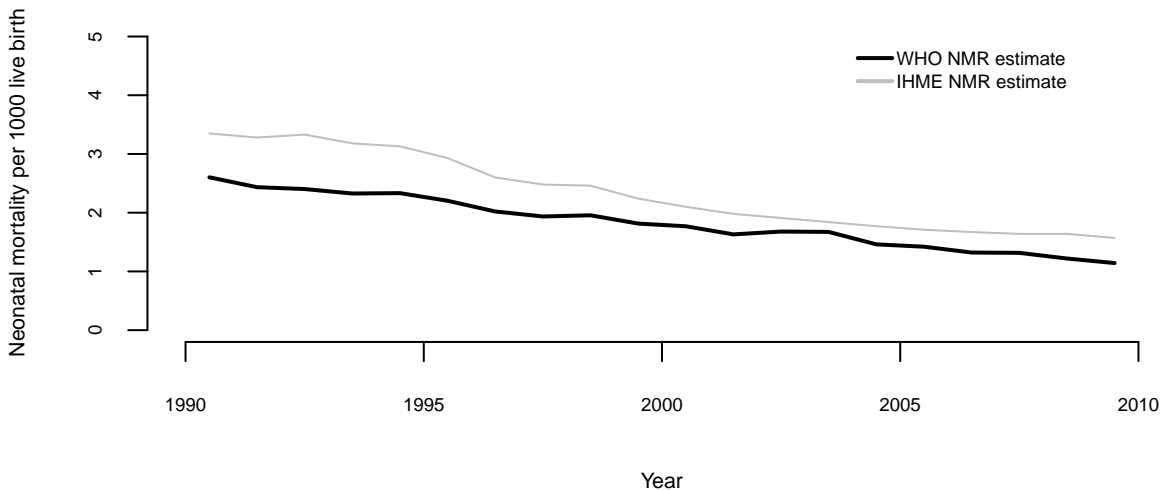

**Japan**  
**Percentage difference between WHO and IHME NMR estimates**

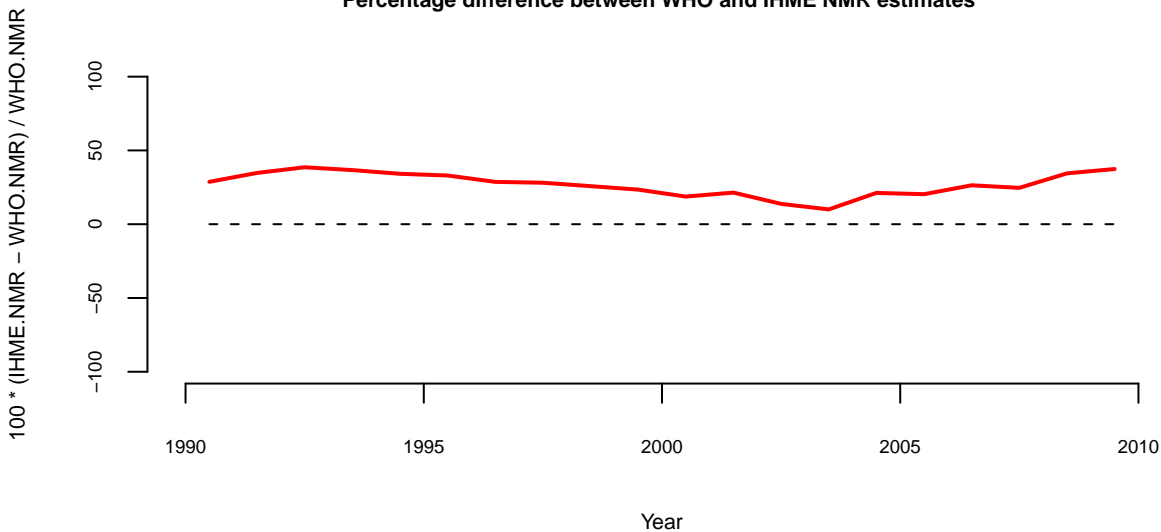

**Jordan**  
**Paired t-test: p-value = 7.5e-13**

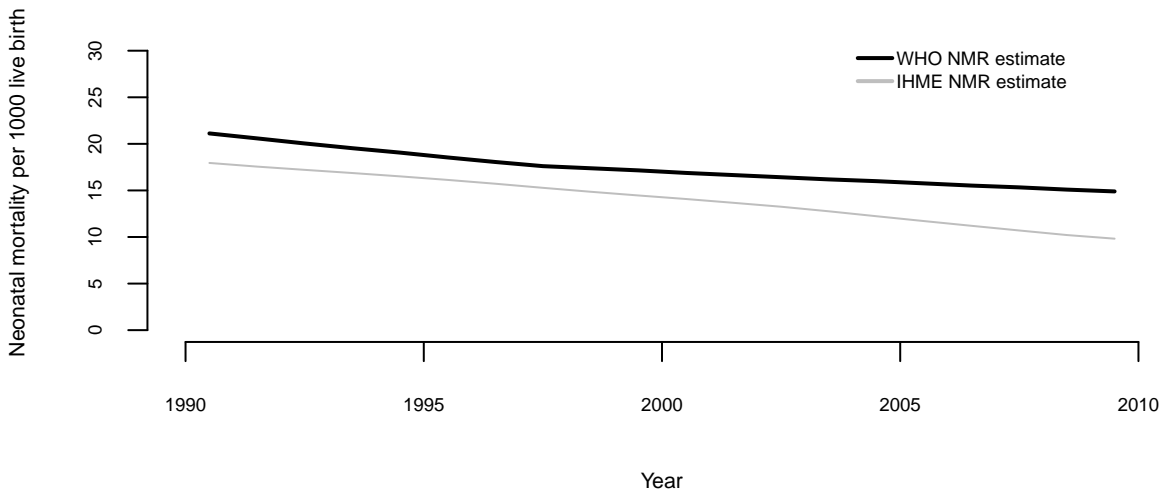

**Jordan**  
**Percentage difference between WHO and IHME NMR estimates**

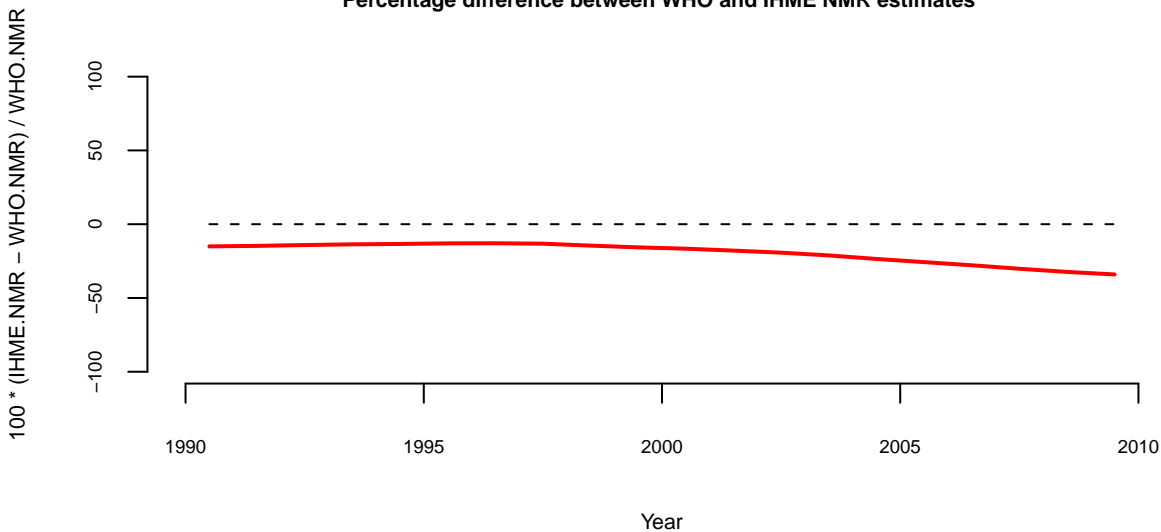

**Kazakhstan**  
**Paired t-test: p-value = 2.4e-07**

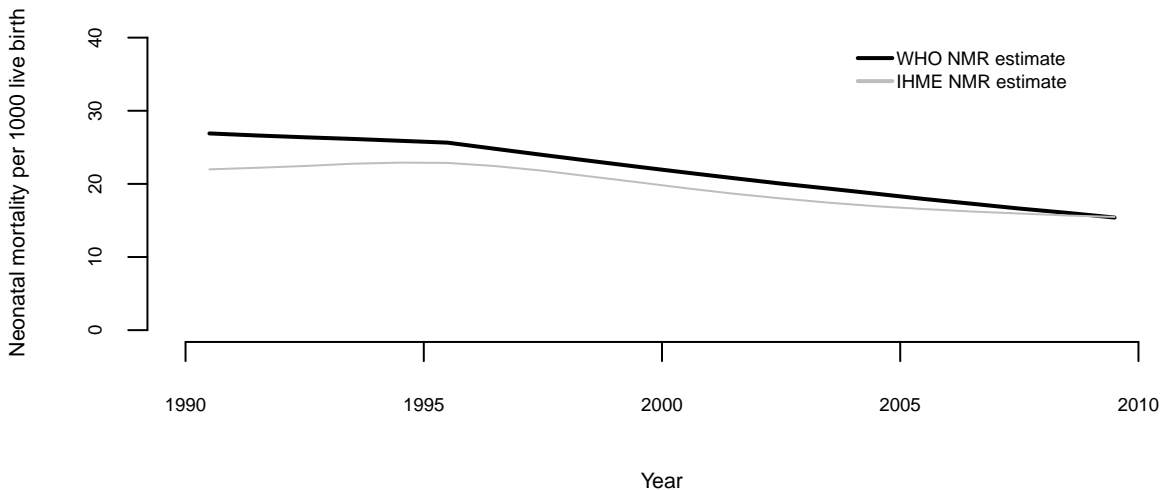

**Kazakhstan**  
**Percentage difference between WHO and IHME NMR estimates**

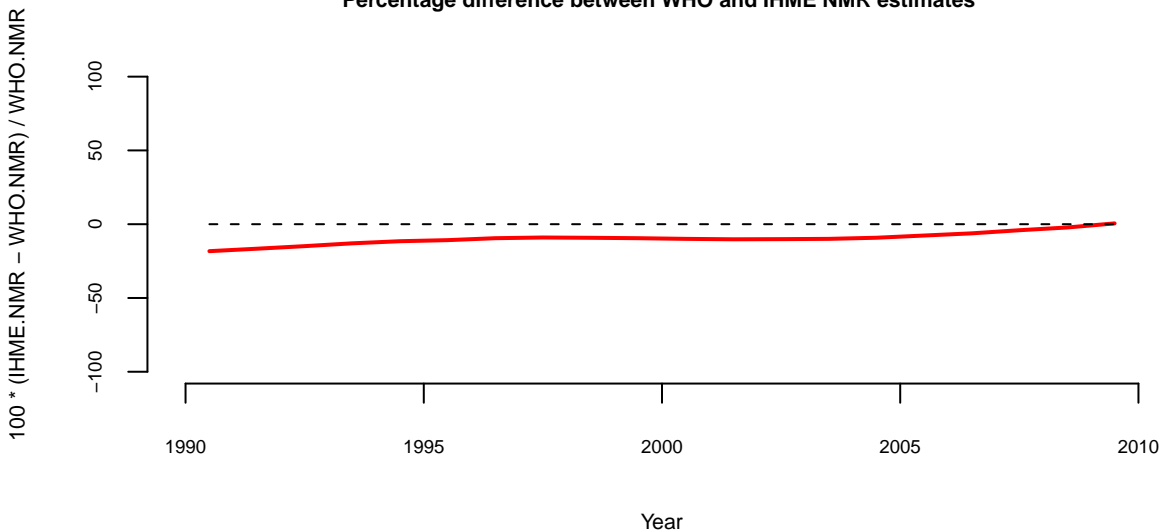

**Kenya**  
**Paired t-test: p-value = 8.3e-11**

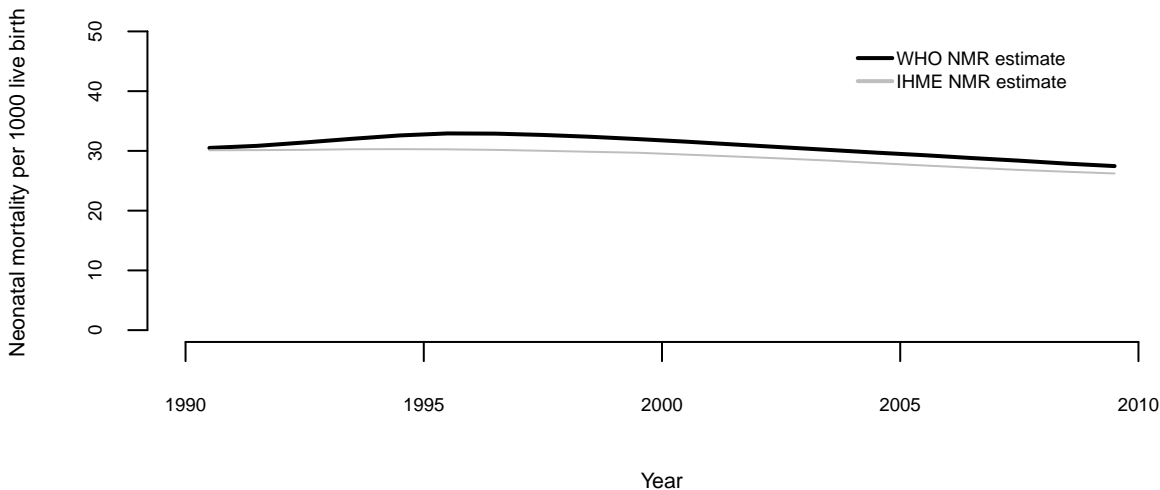

**Kenya**  
**Percentage difference between WHO and IHME NMR estimates**

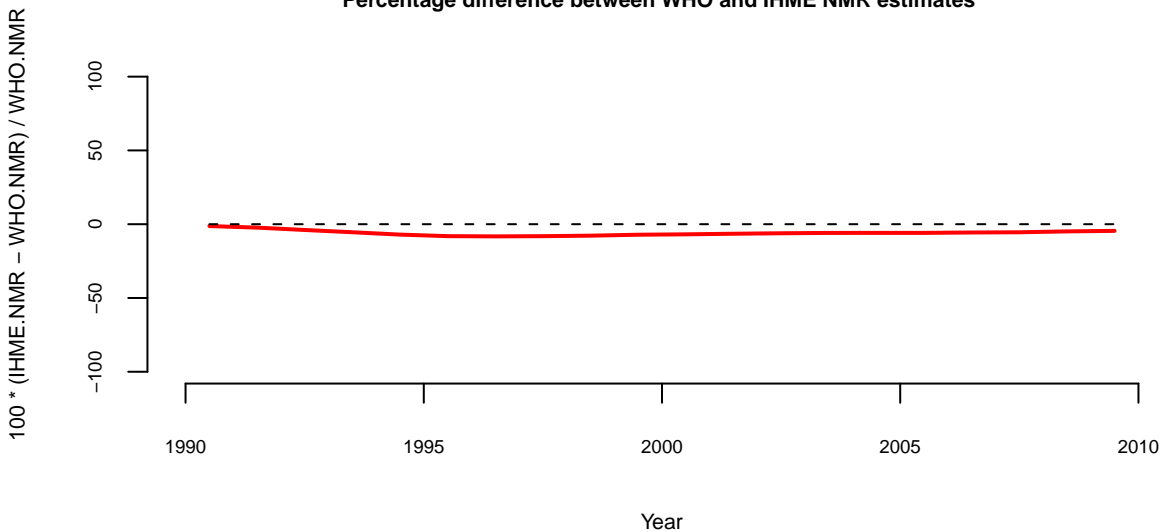

**Kuwait**  
**Paired t-test: p-value = 0.0046**

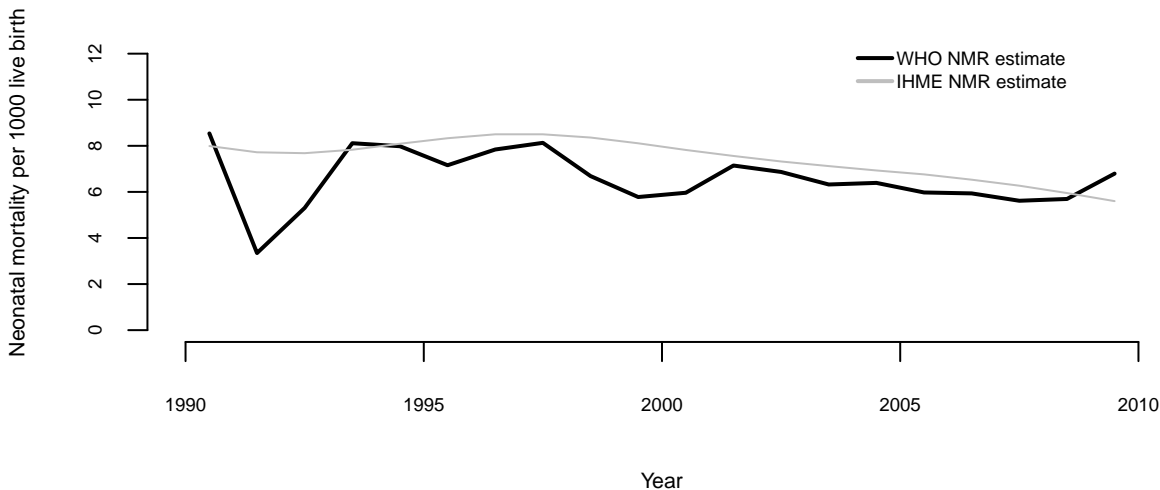

**Kuwait**  
**Percentage difference between WHO and IHME NMR estimates**

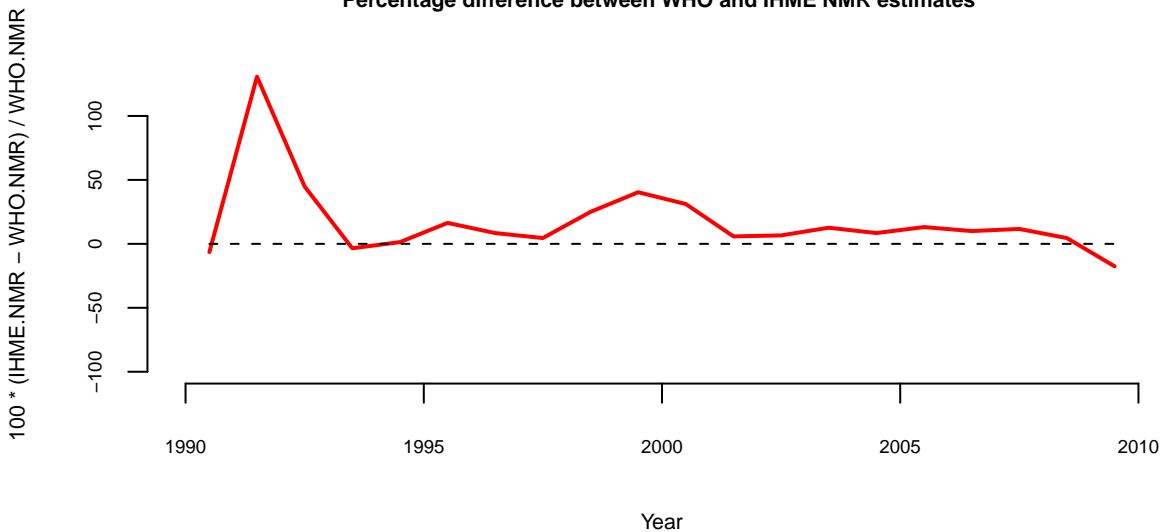

Kyrgyzstan  
Paired t-test: p-value = 9e-04

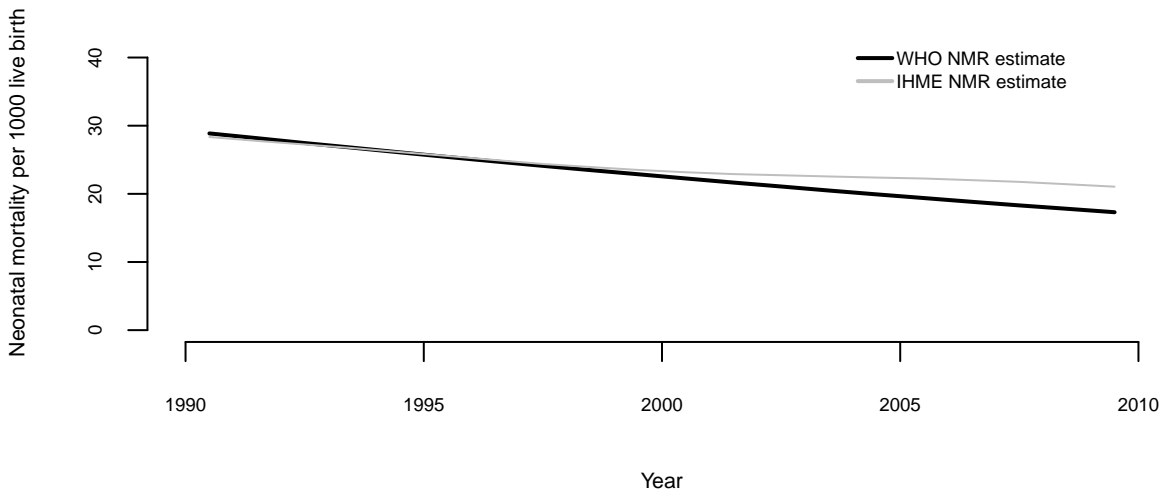

Kyrgyzstan  
Percentage difference between WHO and IHME NMR estimates

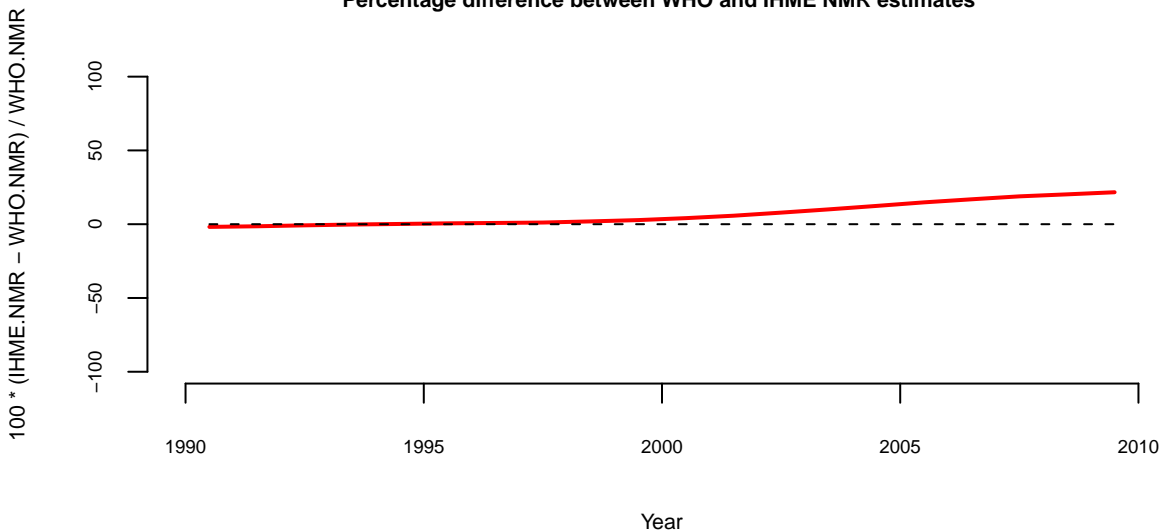

Latvia  
Paired t-test: p-value = 0.00029

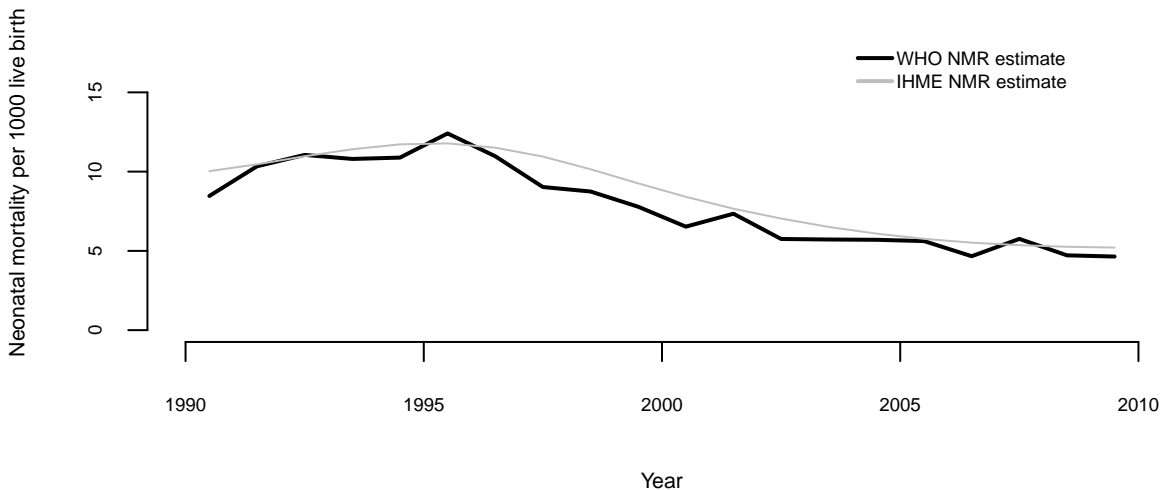

Latvia  
Percentage difference between WHO and IHME NMR estimates

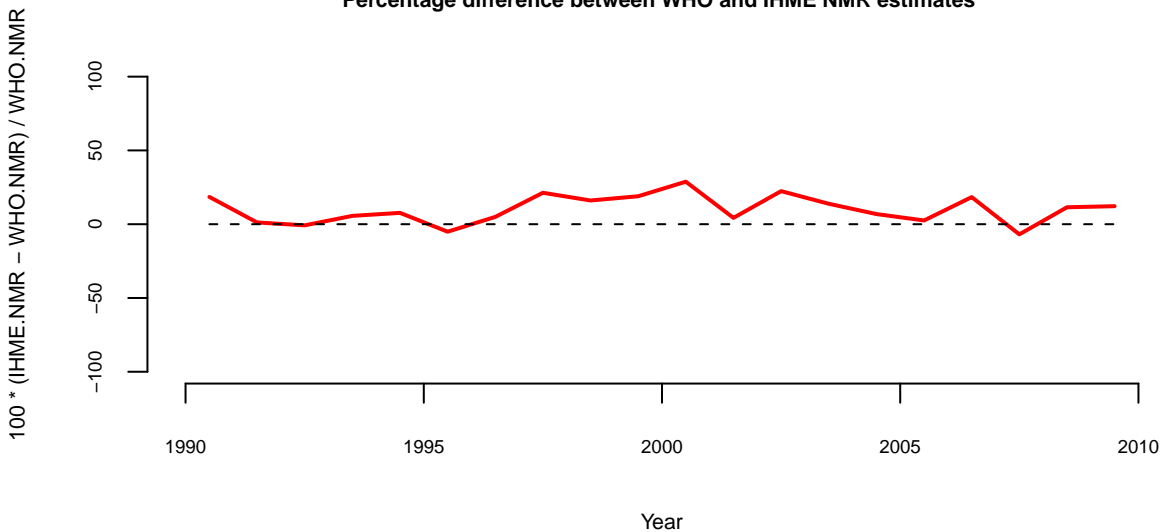

**Lebanon**  
**Paired t-test: p-value = 7.7e-07**

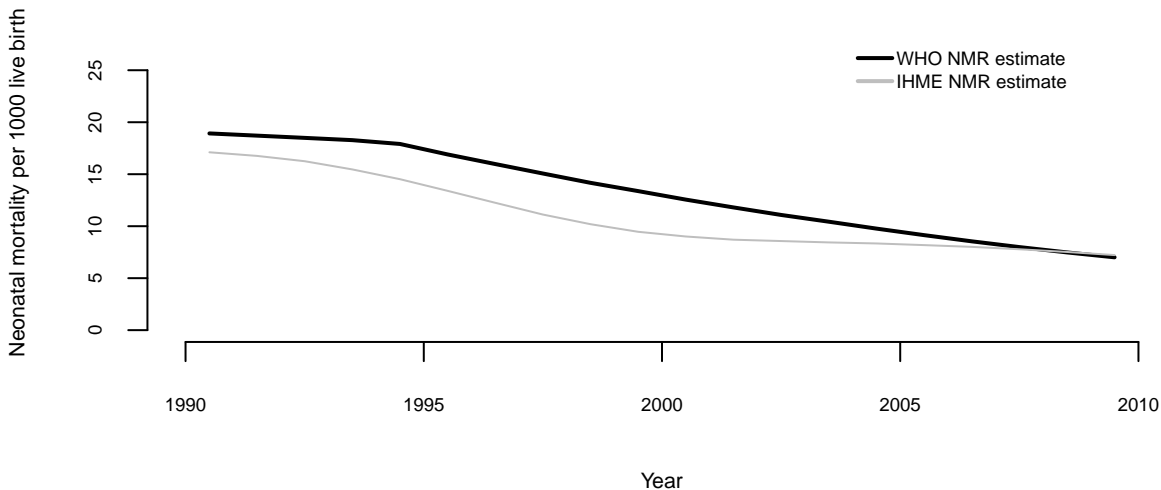

**Lebanon**  
**Percentage difference between WHO and IHME NMR estimates**

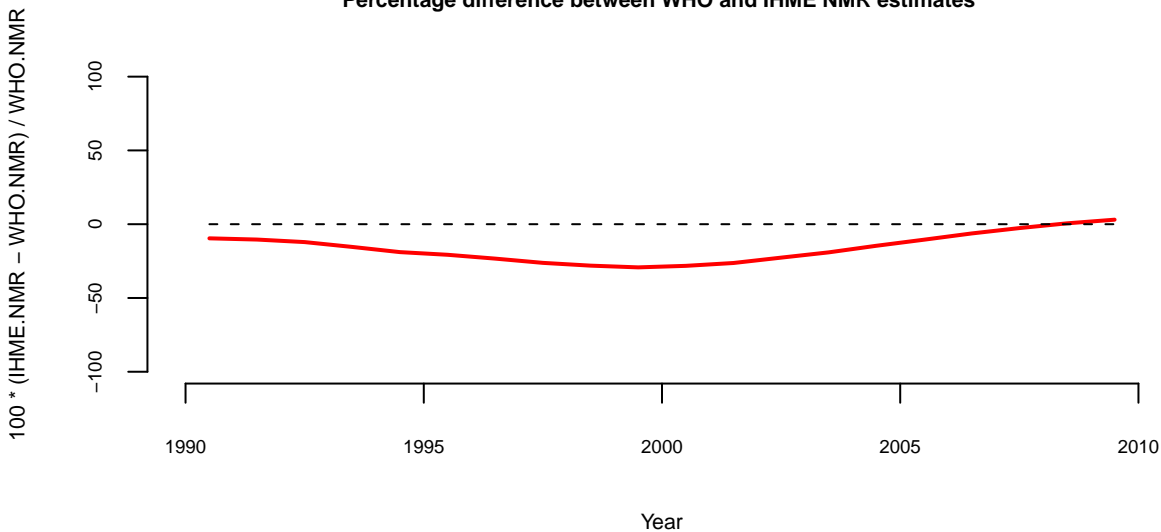

**Lesotho**  
**Paired t-test: p-value = 0.0055**

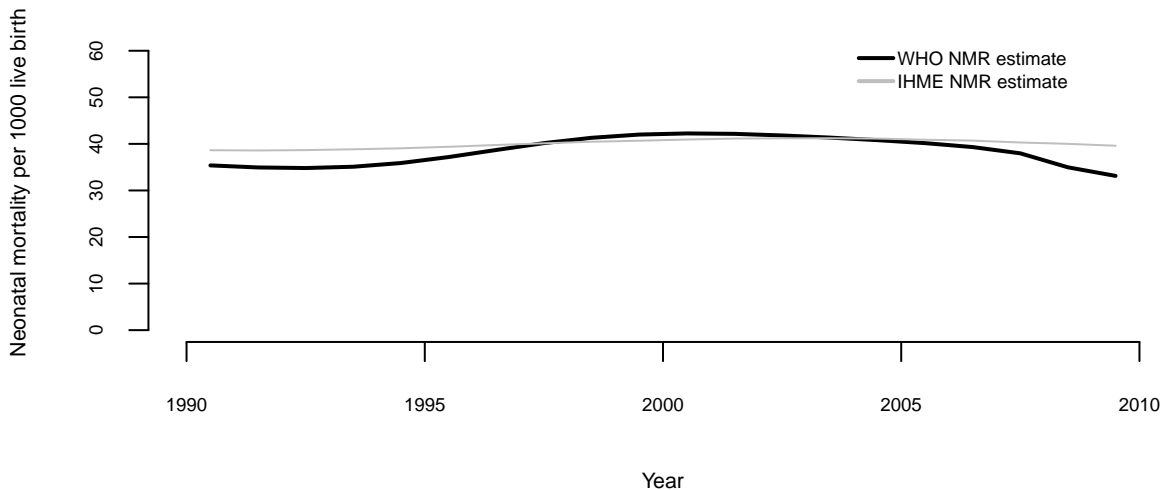

**Lesotho**  
**Percentage difference between WHO and IHME NMR estimates**

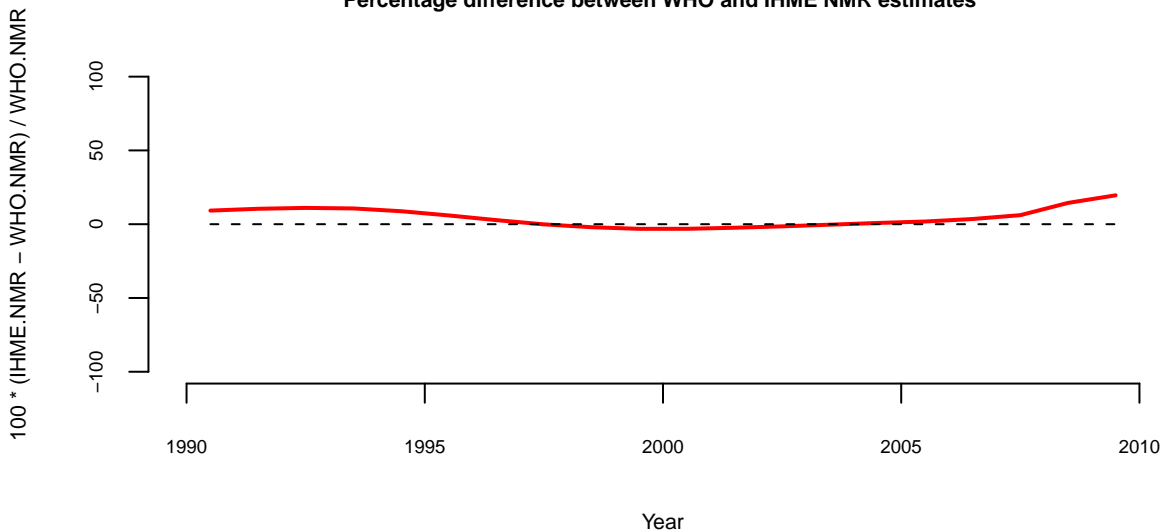

**Liberia**  
**Paired t-test: p-value = 0.93**

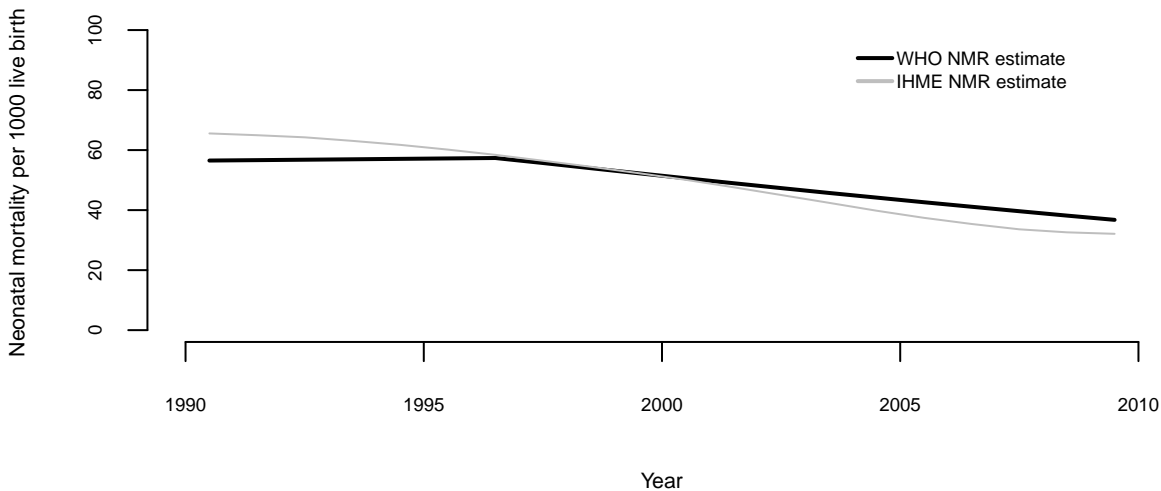

**Liberia**  
**Percentage difference between WHO and IHME NMR estimates**

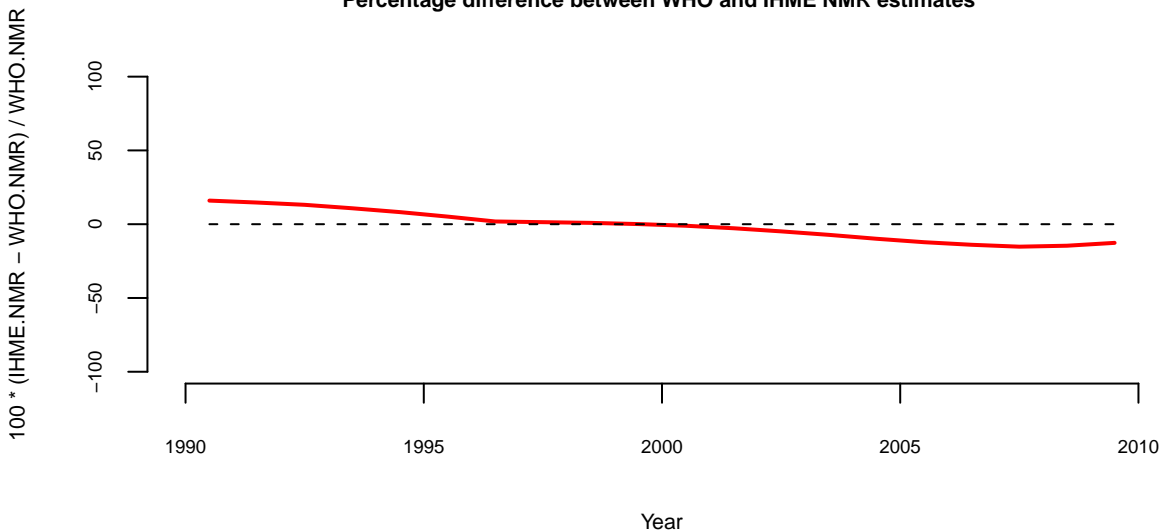

**Libyan Arab Jamahiriya**  
**Paired t-test: p-value = 0.073**

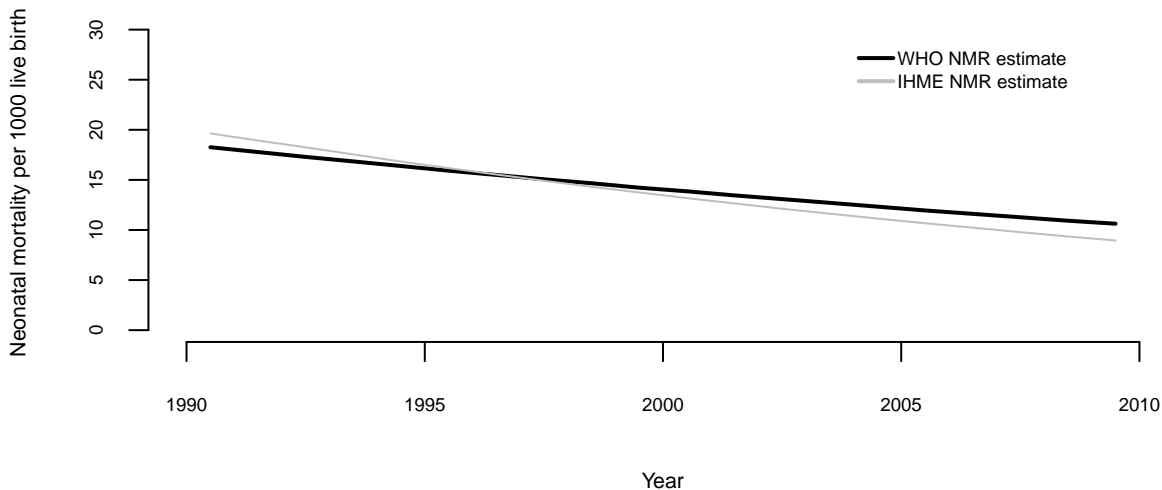

**Libyan Arab Jamahiriya**  
**Percentage difference between WHO and IHME NMR estimates**

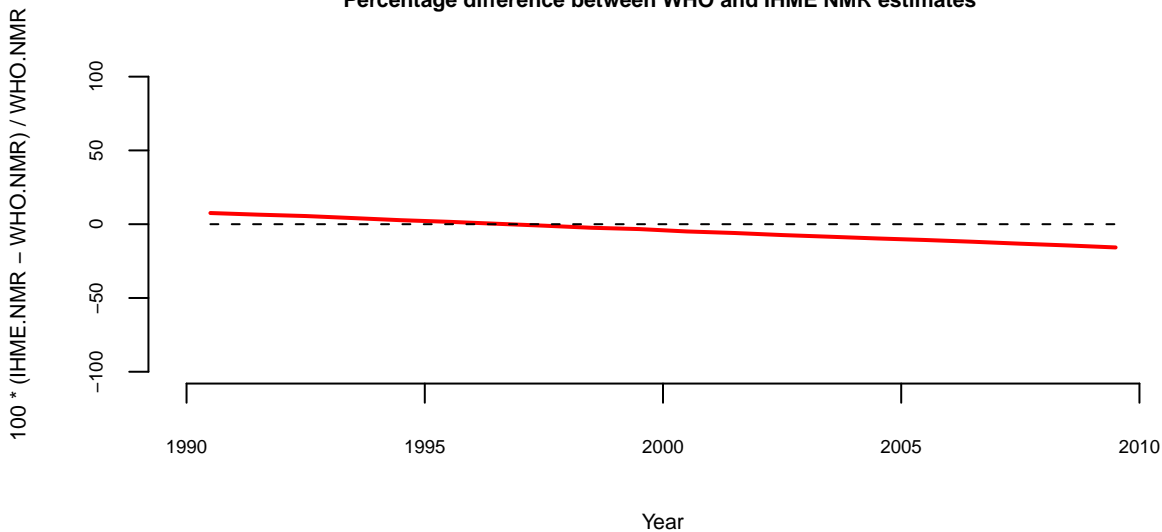

**Lithuania**  
**Paired t-test: p-value = 0.00019**

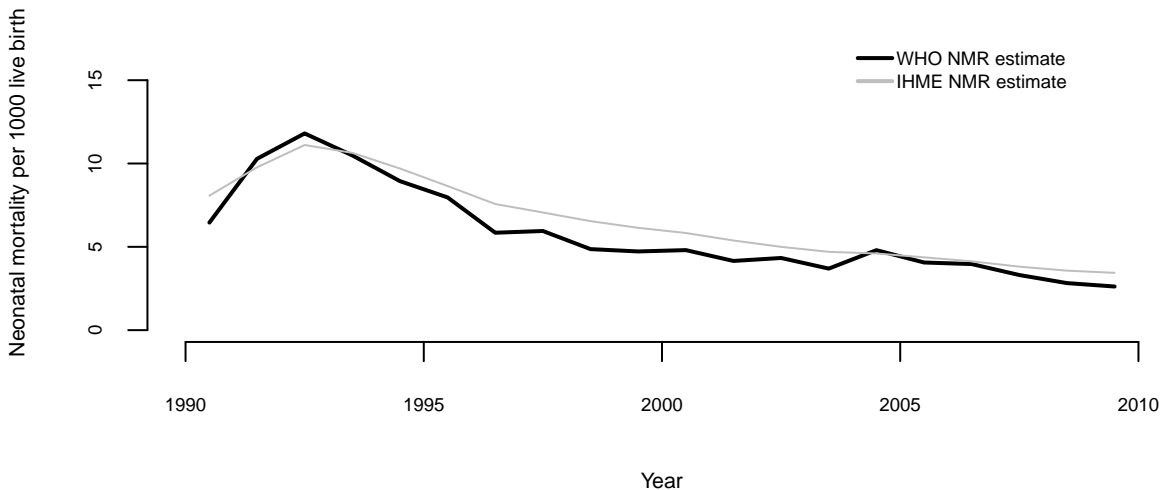

**Lithuania**  
**Percentage difference between WHO and IHME NMR estimates**

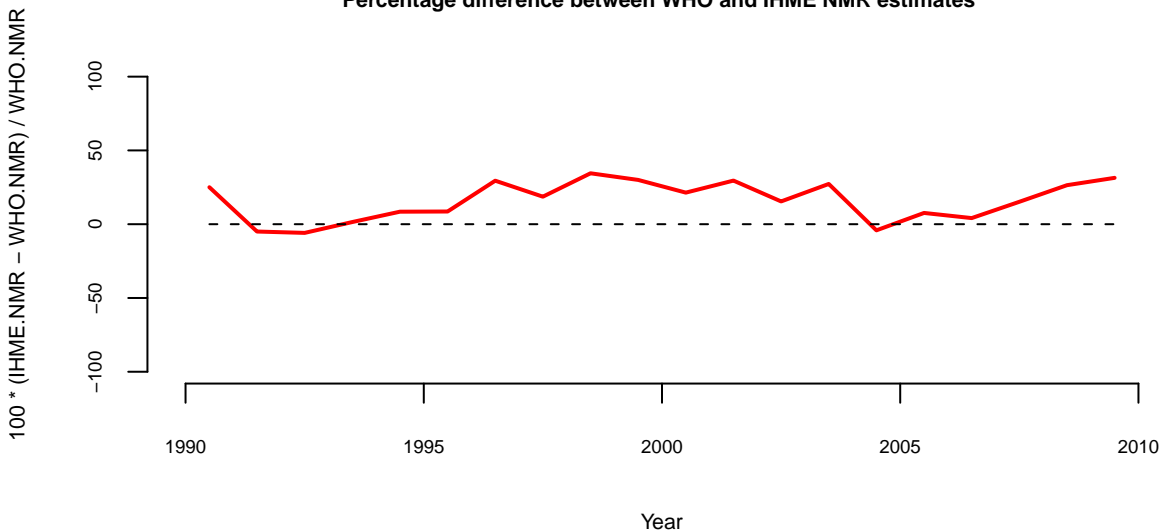

**Luxembourg**  
**Paired t-test: p-value = 2.2e-06**

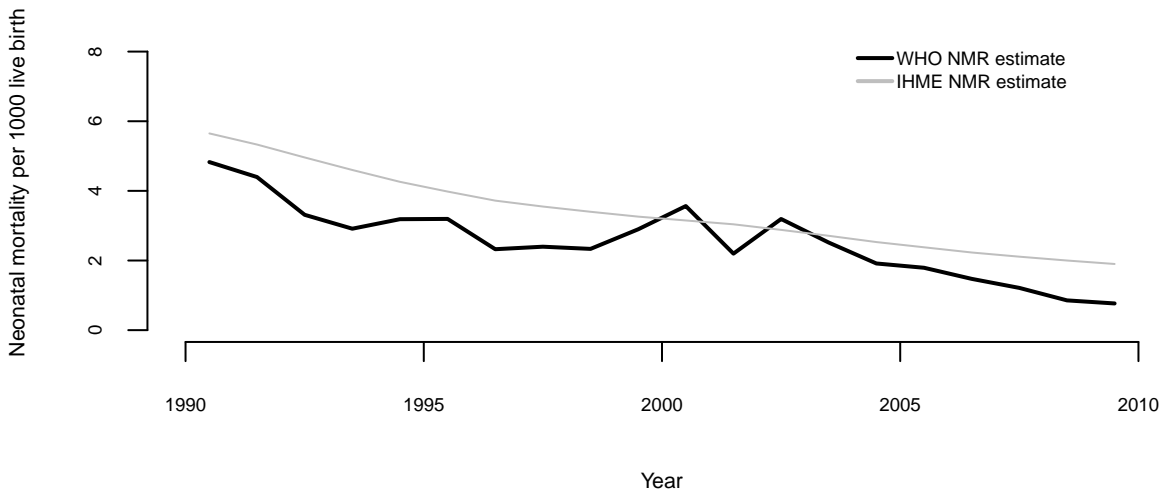

**Luxembourg**  
**Percentage difference between WHO and IHME NMR estimates**

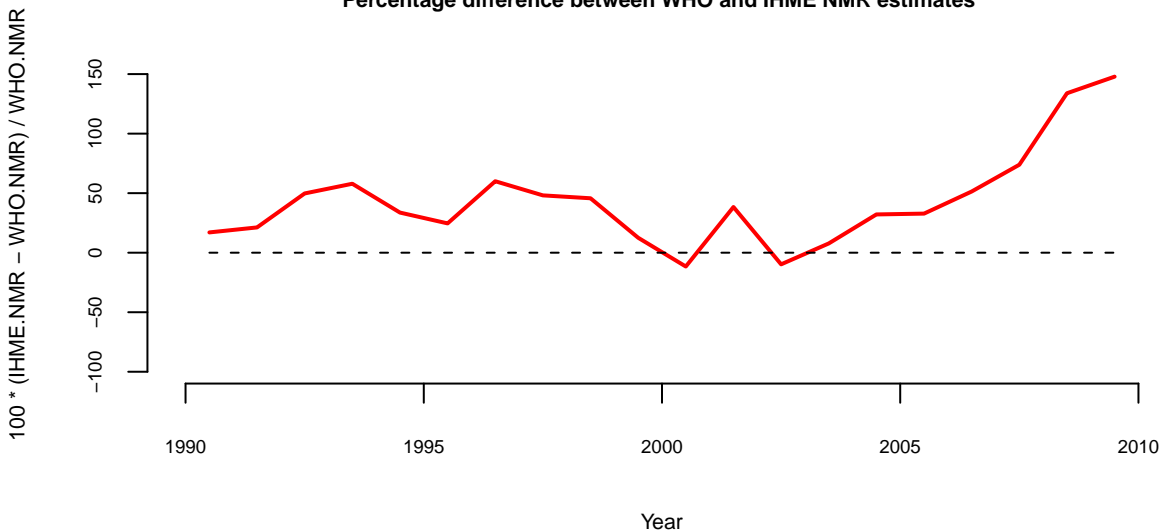

**Madagascar**  
**Paired t-test: p-value = 3.2e-05**

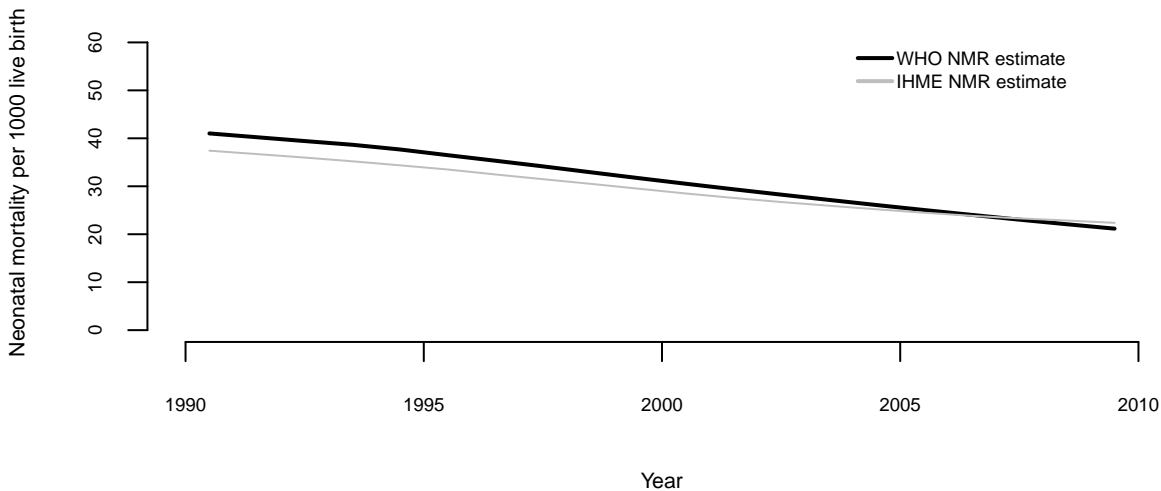

**Madagascar**  
**Percentage difference between WHO and IHME NMR estimates**

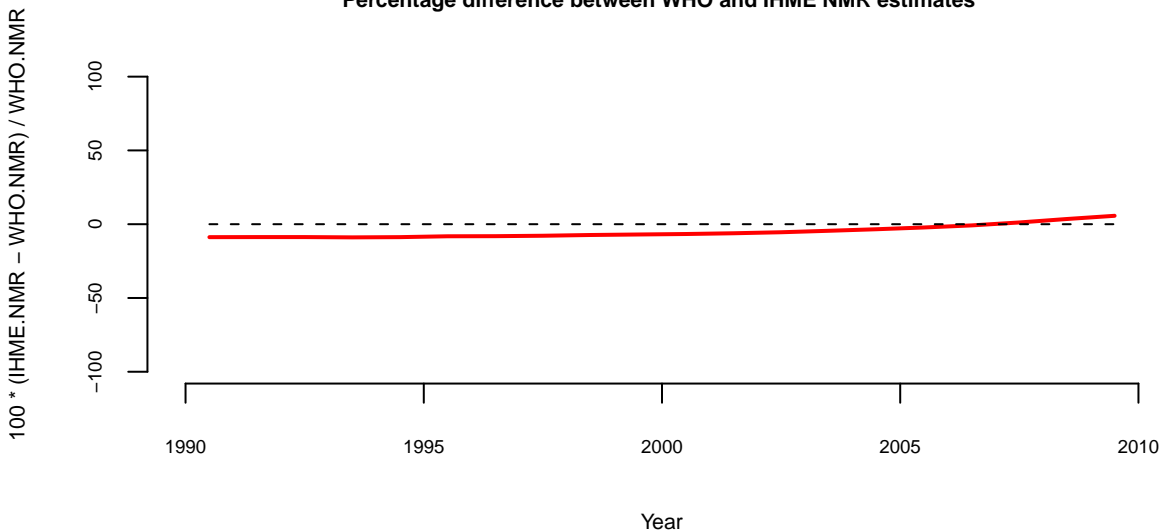

**Malawi**  
**Paired t-test: p-value = 0.45**

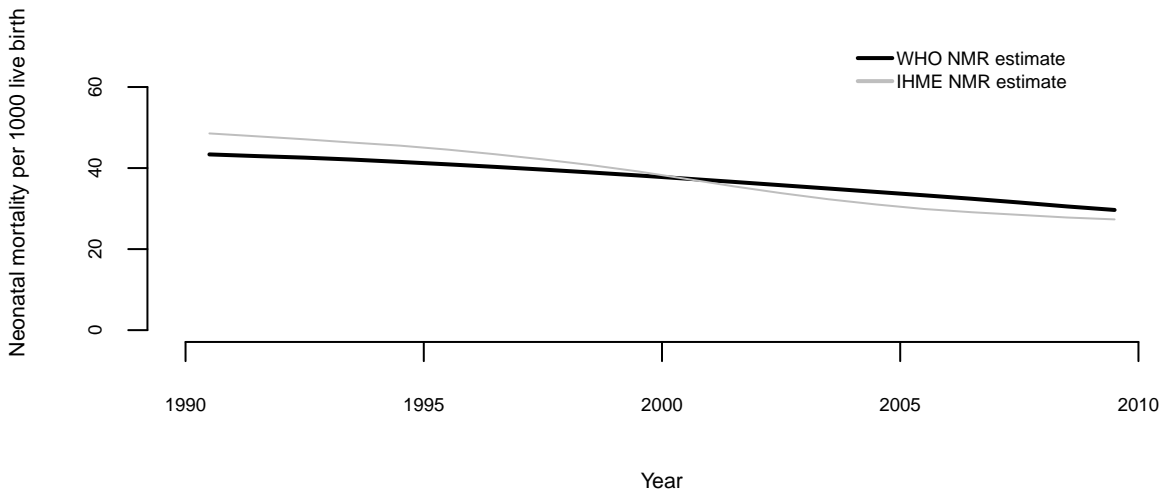

**Malawi**  
**Percentage difference between WHO and IHME NMR estimates**

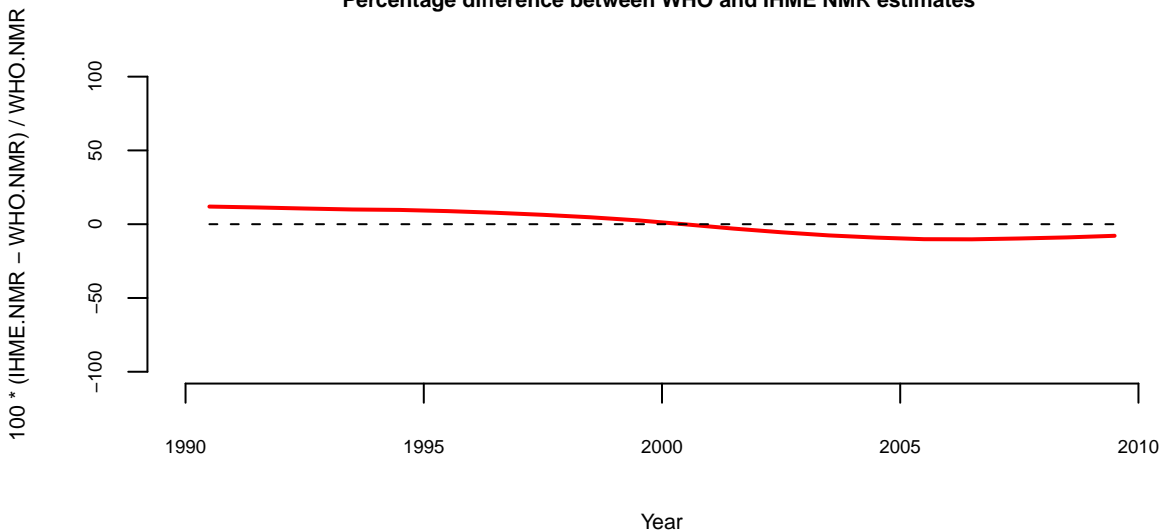

**Malaysia**  
**Paired t-test: p-value = 3.8e-18**

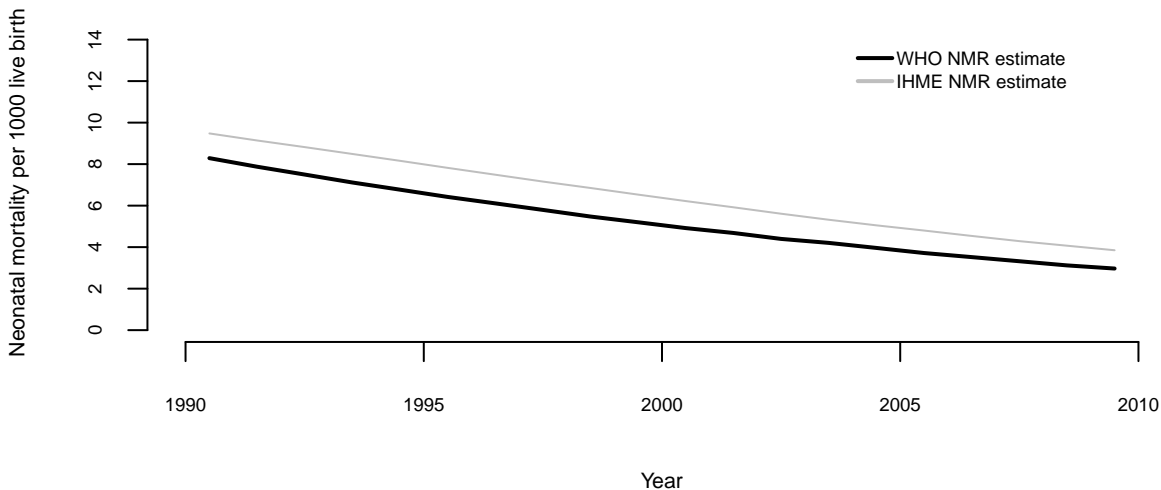

**Malaysia**  
**Percentage difference between WHO and IHME NMR estimates**

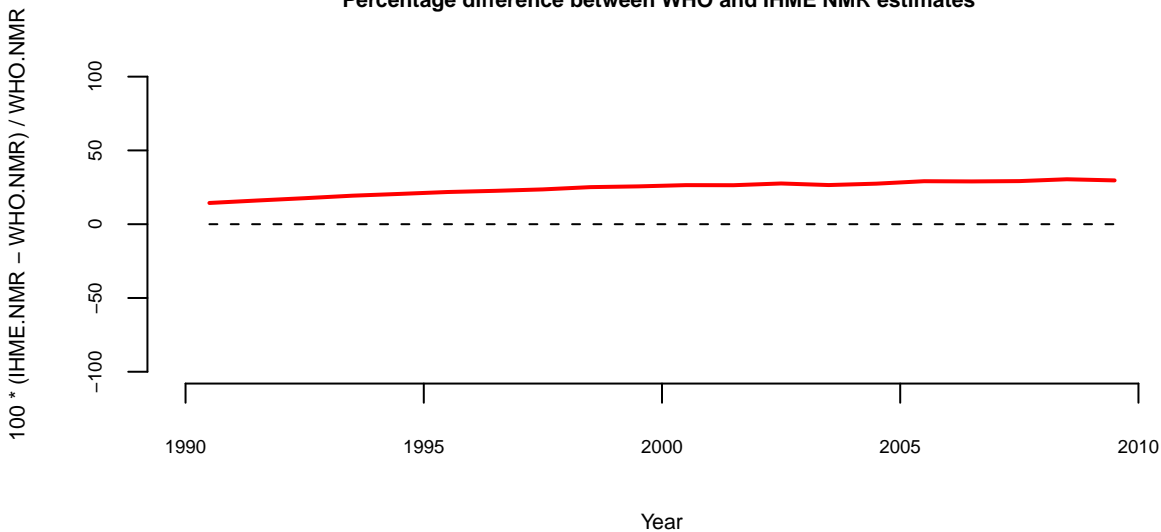

**Maldives**  
**Paired t-test: p-value = 1.4e-05**

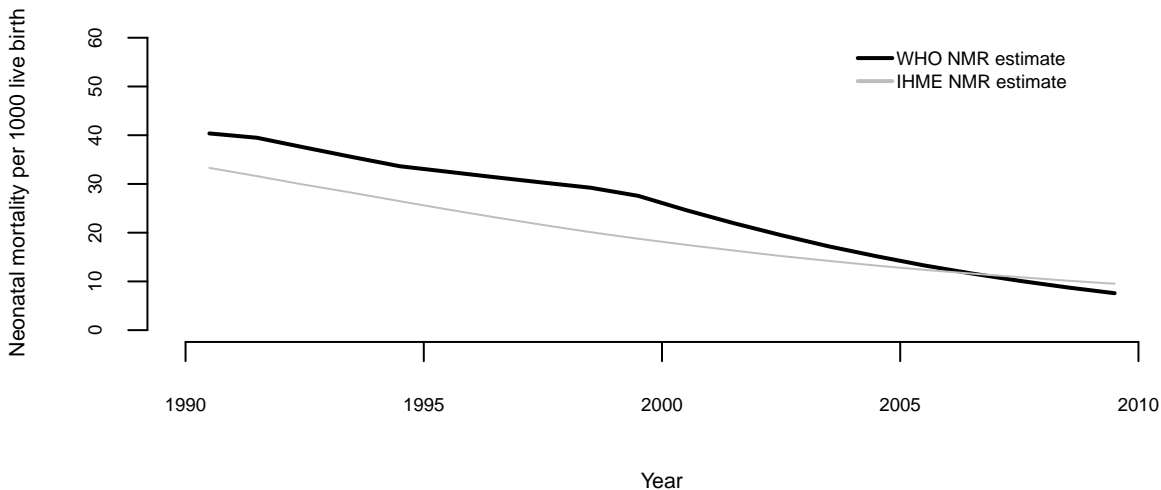

**Maldives**  
**Percentage difference between WHO and IHME NMR estimates**

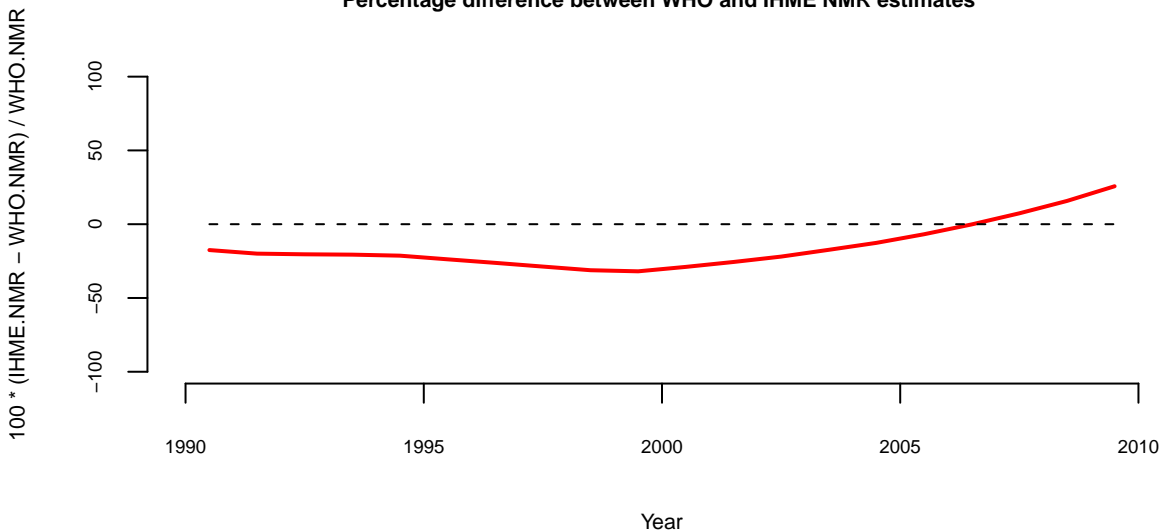

**Mali**  
**Paired t-test: p-value = 3.5e-05**

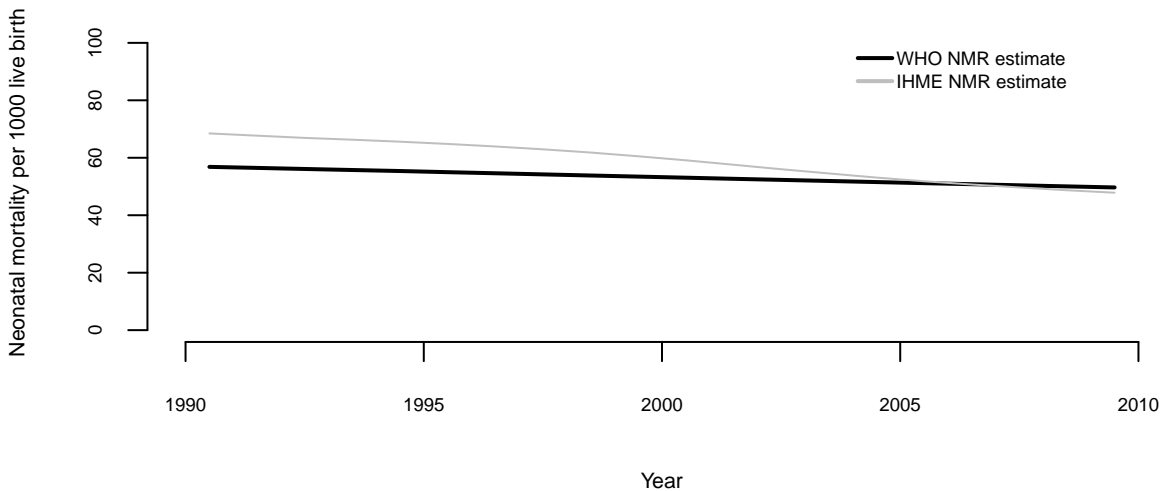

**Mali**  
**Percentage difference between WHO and IHME NMR estimates**

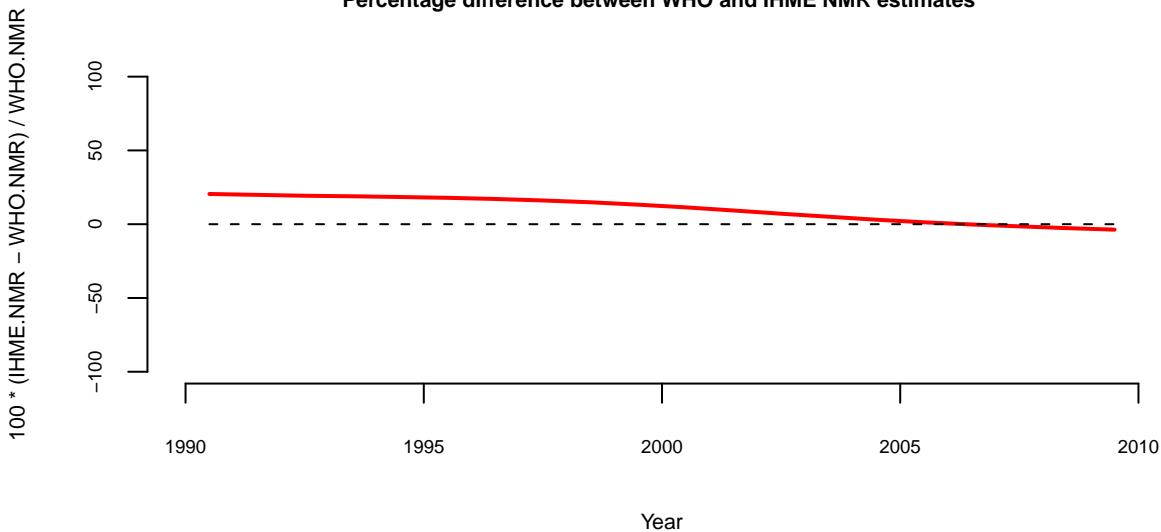

**Malta**  
**Paired t-test: p-value = 0.15**

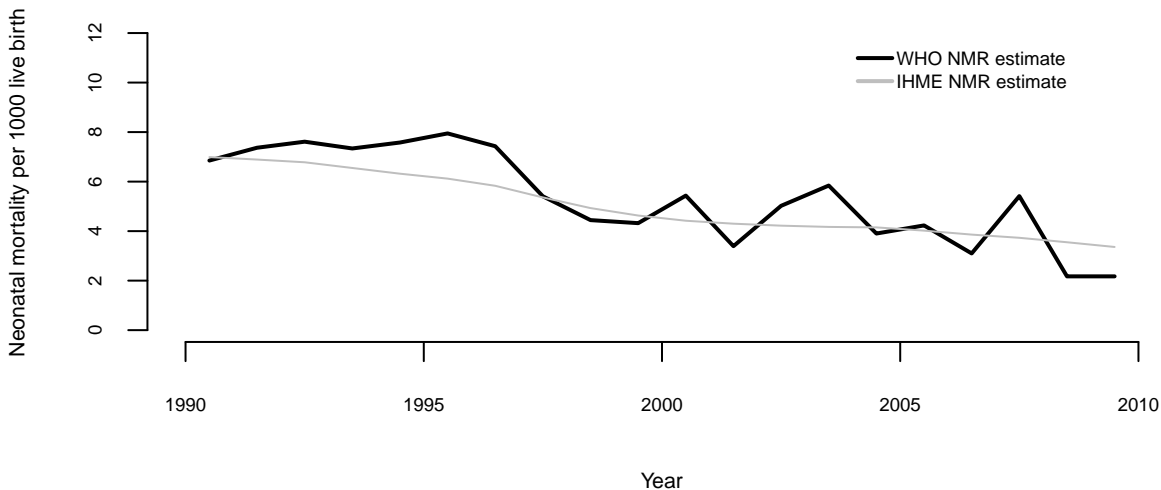

**Malta**  
**Percentage difference between WHO and IHME NMR estimates**

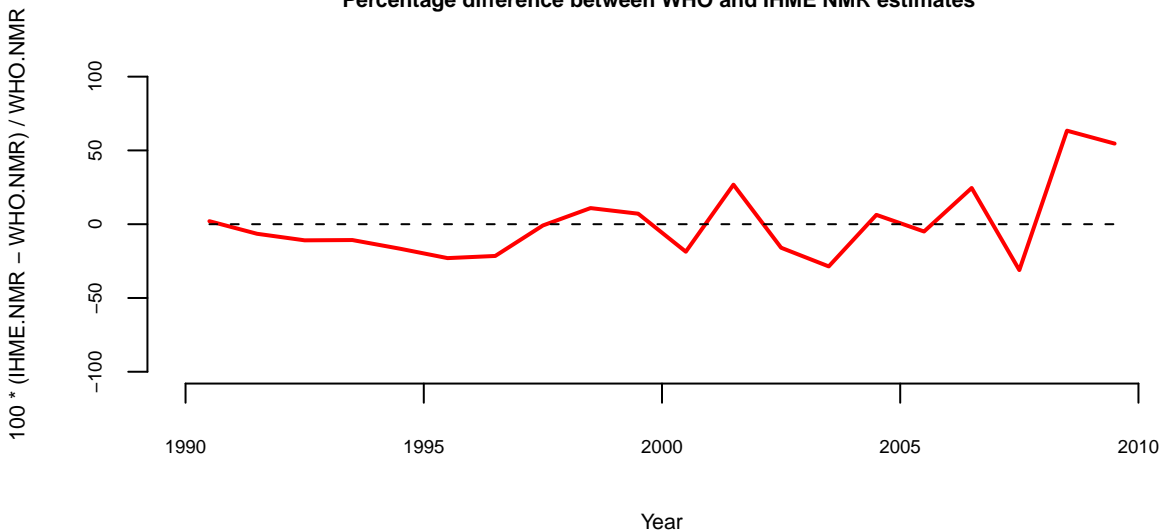

**Mauritania**  
**Paired t-test: p-value = 7.5e-13**

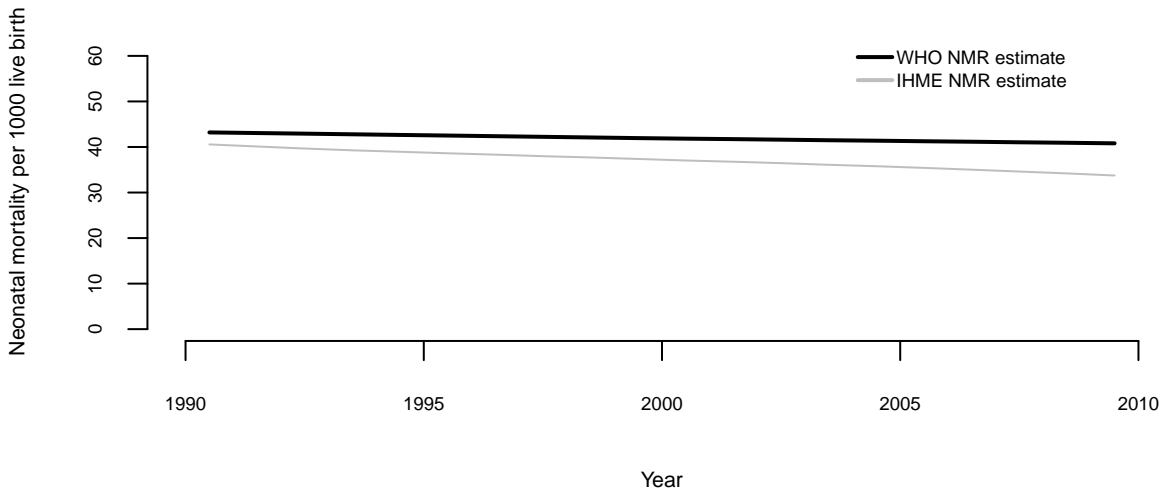

**Mauritania**  
**Percentage difference between WHO and IHME NMR estimates**

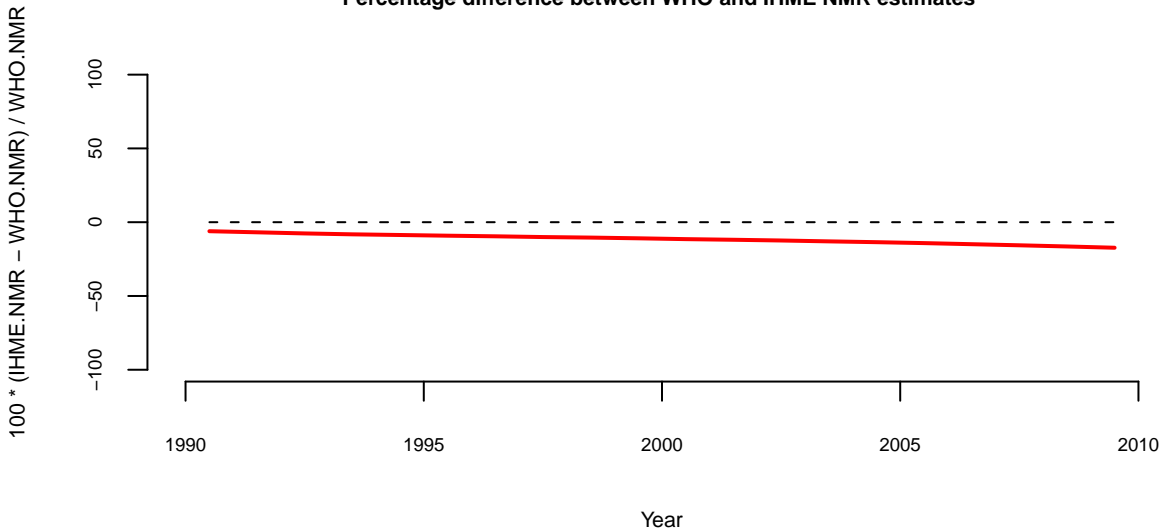

**Mauritius**  
**Paired t-test: p-value = 0.35**

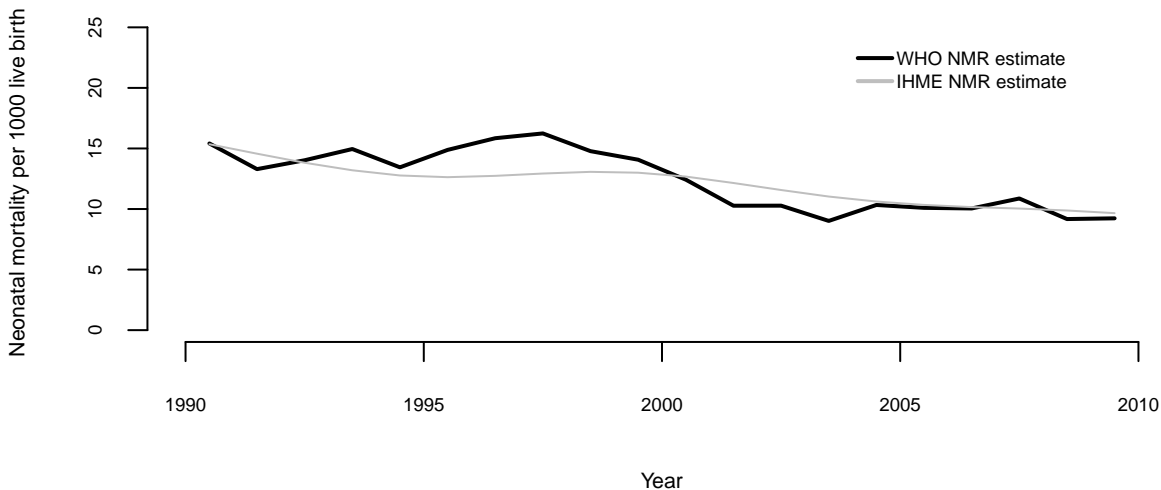

**Mauritius**  
**Percentage difference between WHO and IHME NMR estimates**

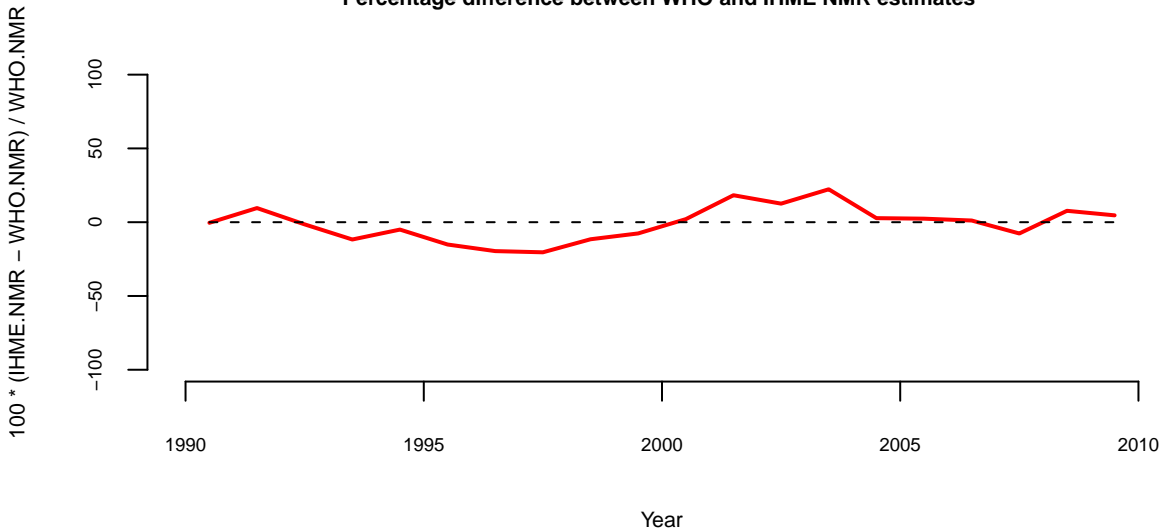

**Mexico**  
**Paired t-test: p-value = 4.3e-07**

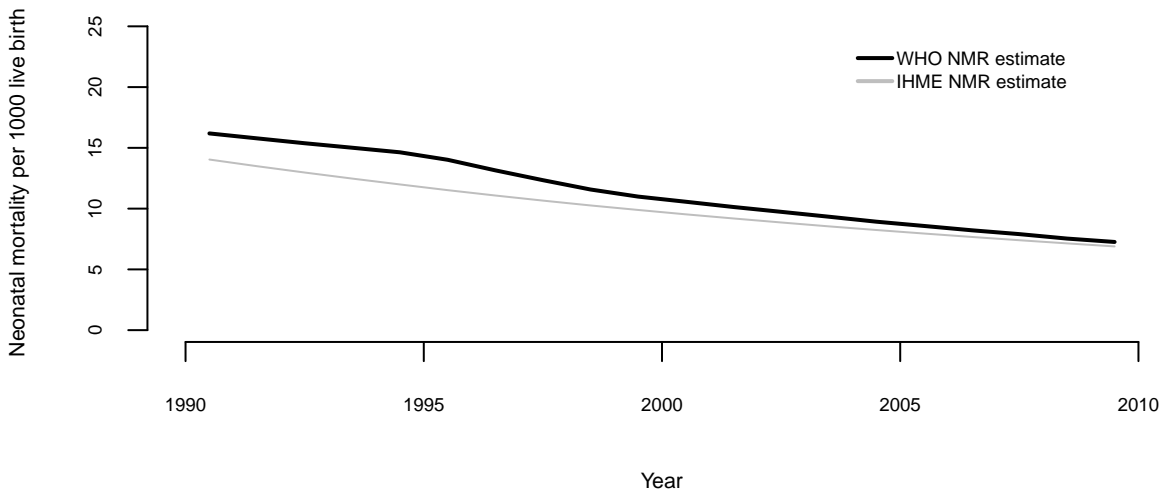

**Mexico**  
**Percentage difference between WHO and IHME NMR estimates**

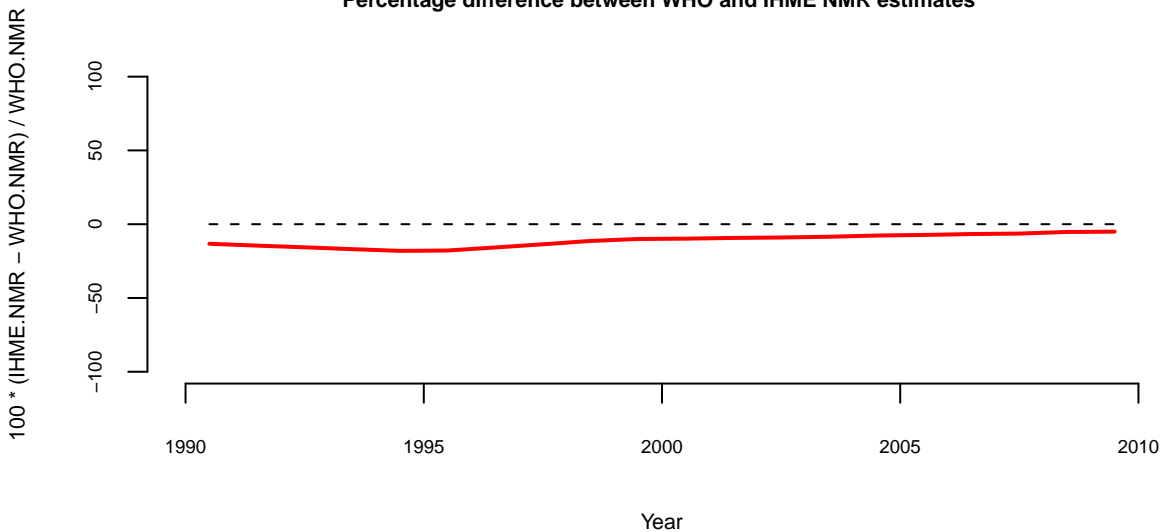

**Mongolia**  
**Paired t-test: p-value = 6.8e-21**

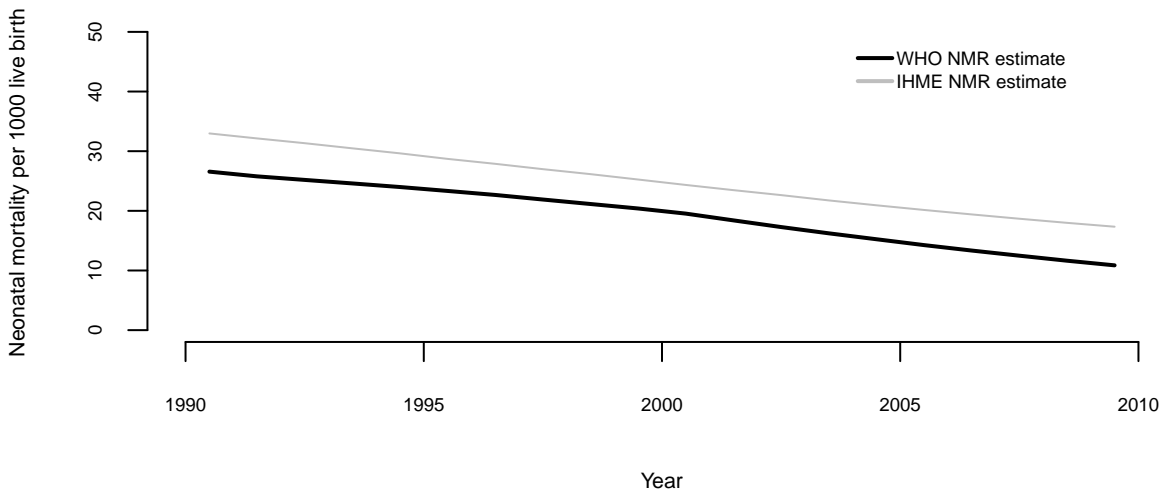

**Mongolia**  
**Percentage difference between WHO and IHME NMR estimates**

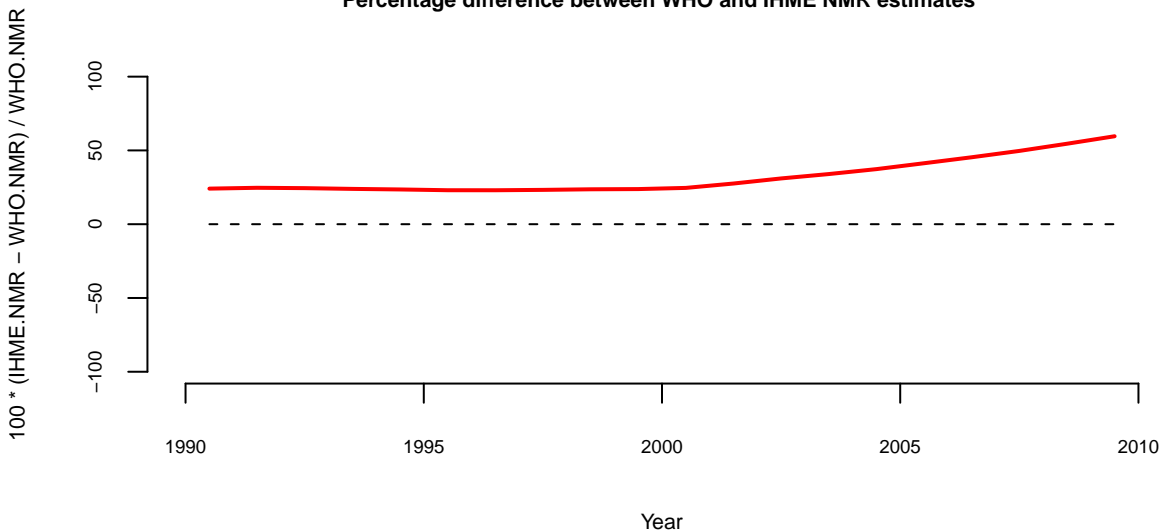

Montenegro  
Paired t-test: p-value = 0.51

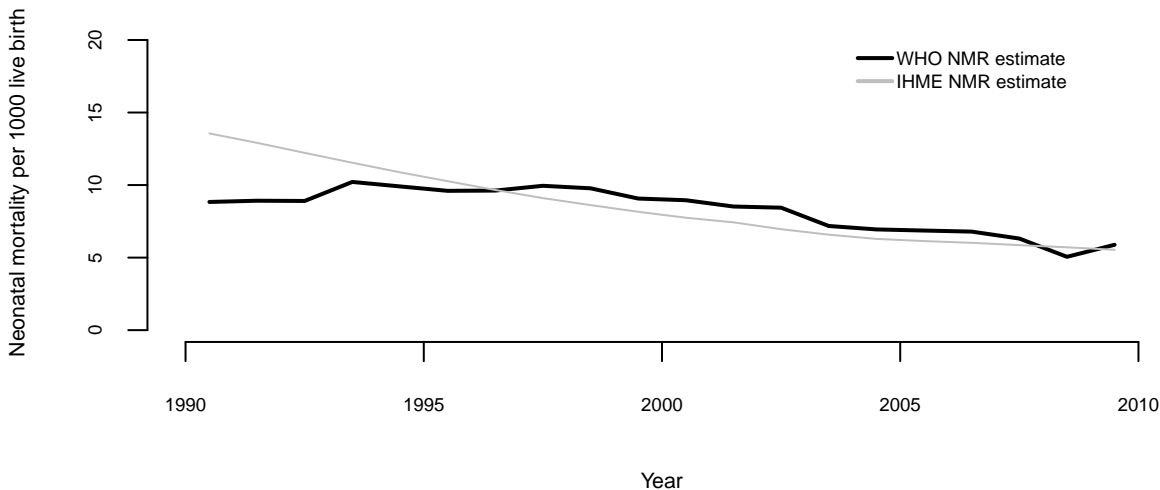

Montenegro  
Percentage difference between WHO and IHME NMR estimates

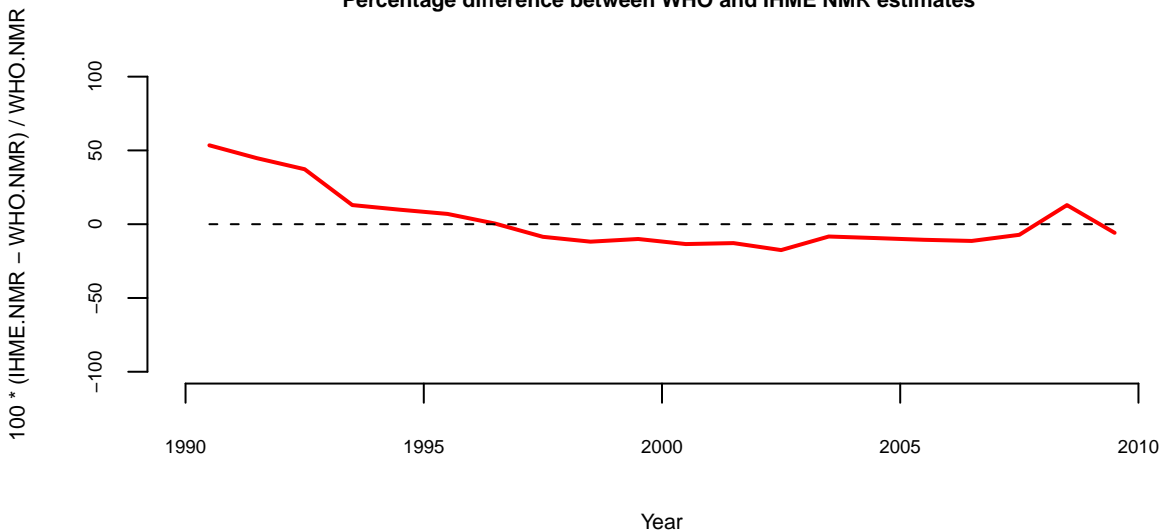

**Morocco**  
**Paired t-test: p-value = 2.7e-06**

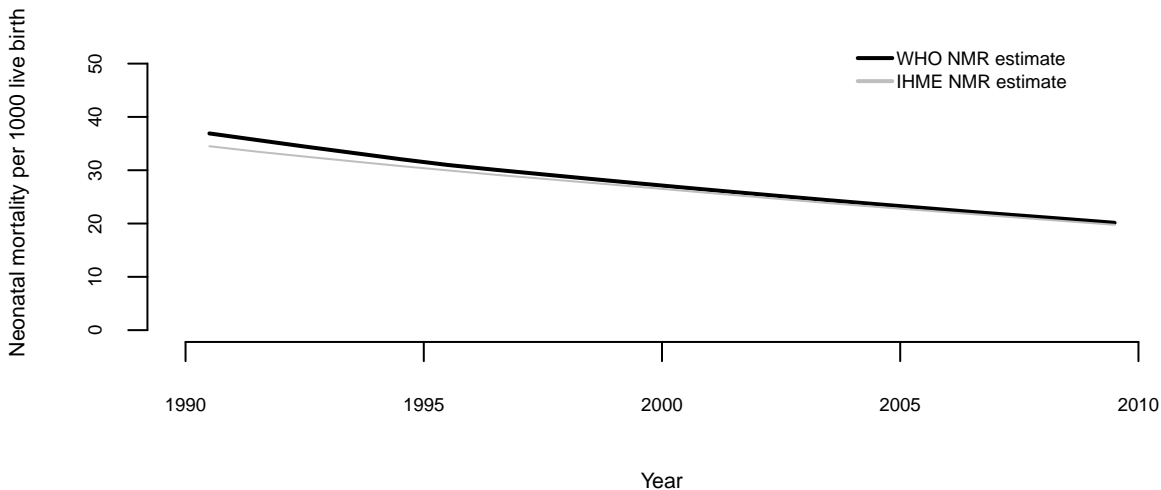

**Morocco**  
**Percentage difference between WHO and IHME NMR estimates**

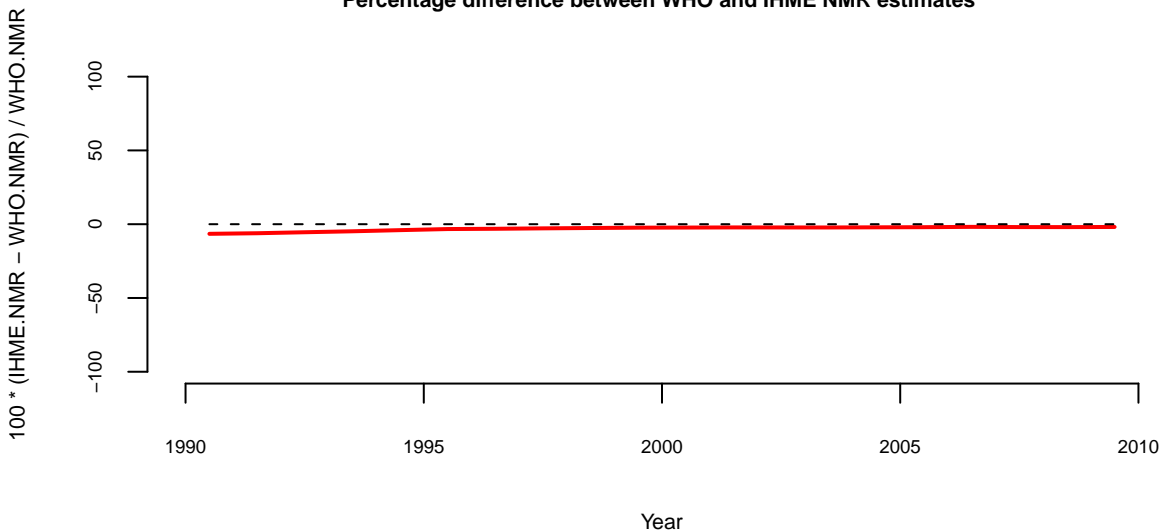

**Mozambique**  
**Paired t-test: p-value = 0.53**

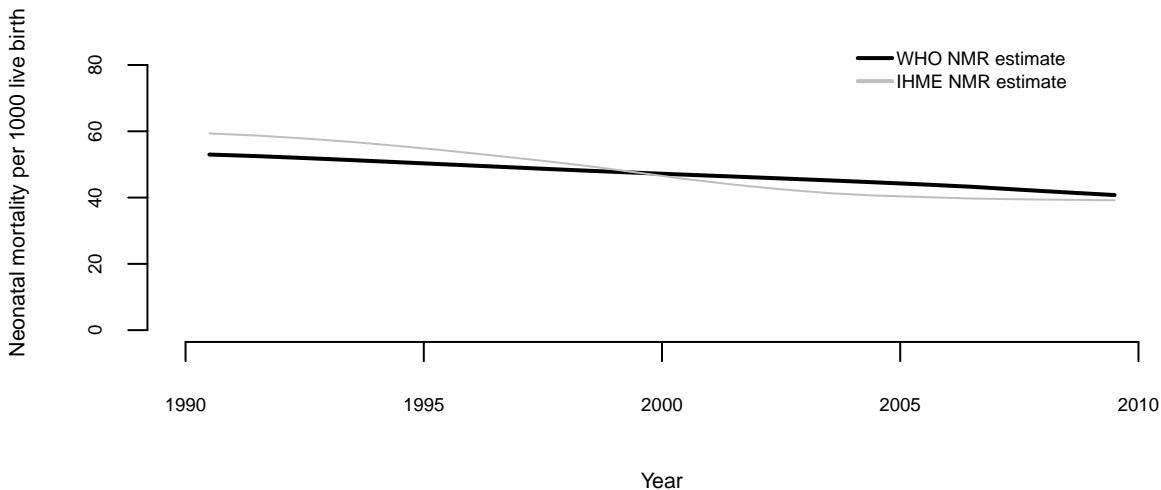

**Mozambique**  
**Percentage difference between WHO and IHME NMR estimates**

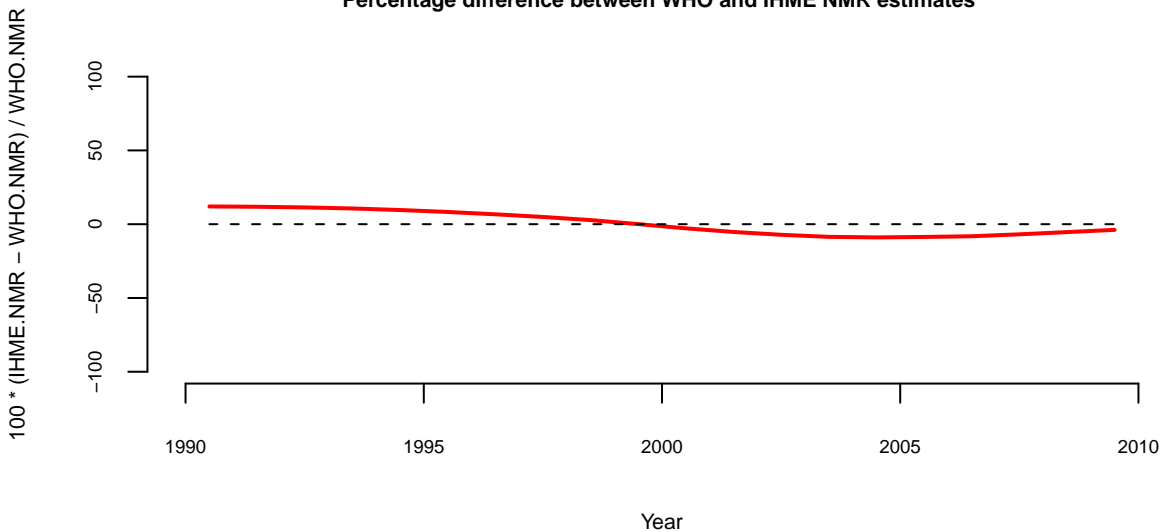

**Myanmar**  
**Paired t-test: p-value = 1.1e-13**

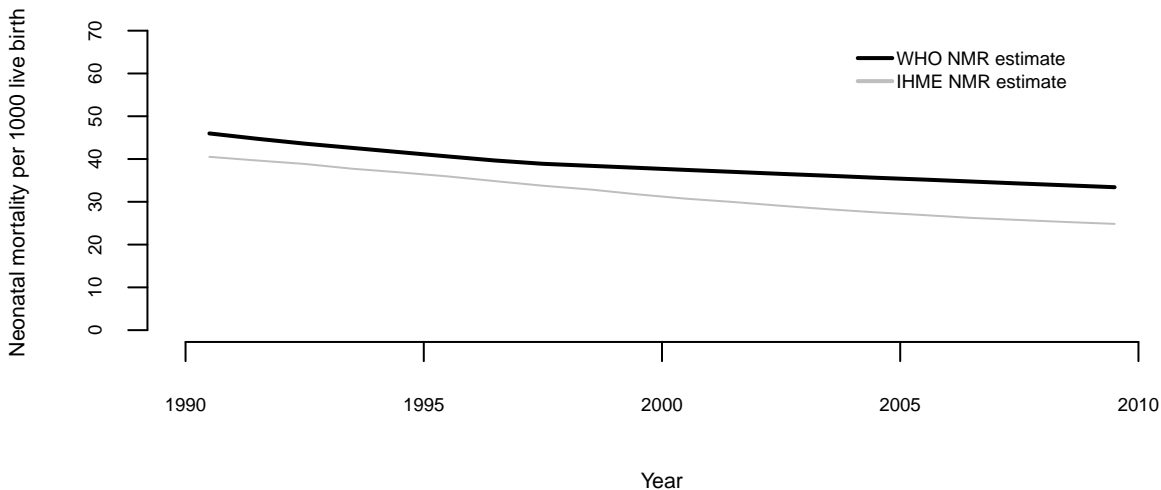

**Myanmar**  
**Percentage difference between WHO and IHME NMR estimates**

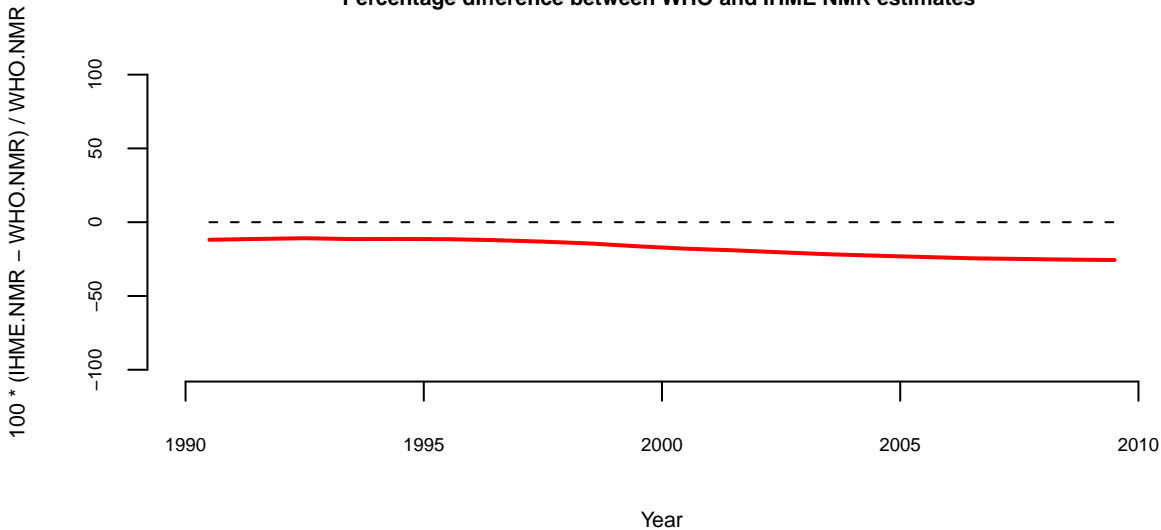

**Namibia**  
**Paired t-test: p-value = 0.58**

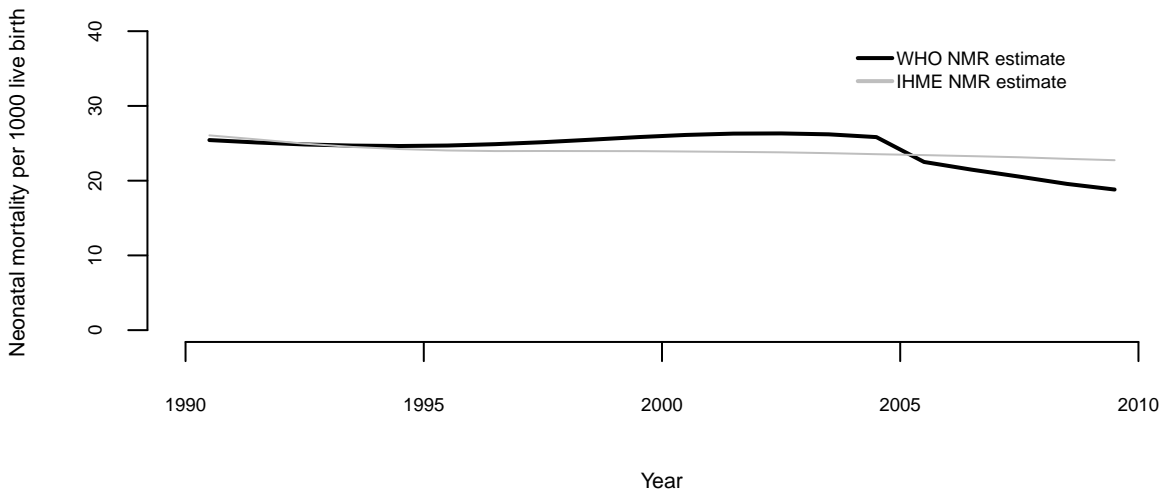

**Namibia**  
**Percentage difference between WHO and IHME NMR estimates**

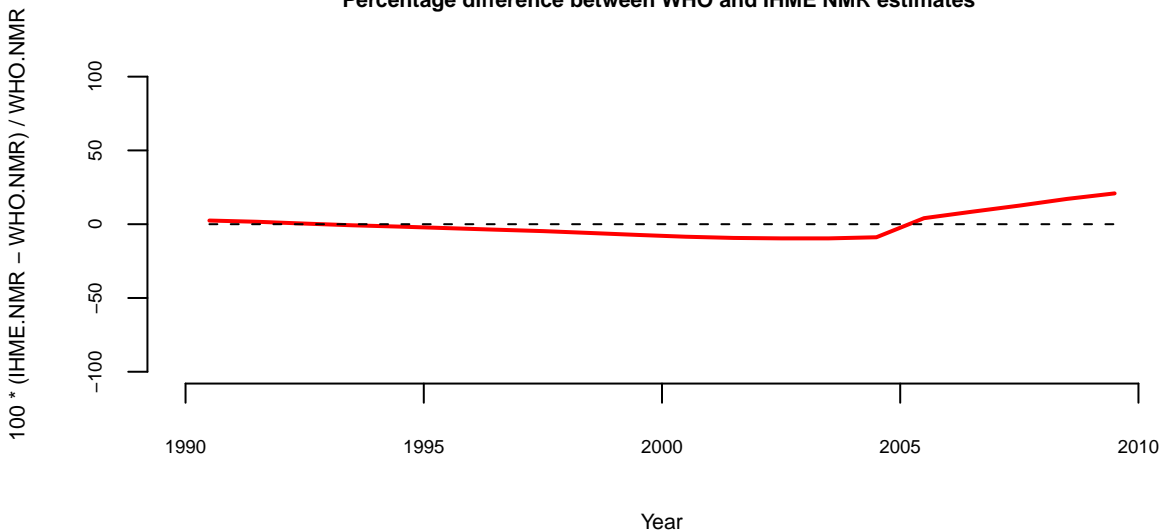

**Nepal**  
**Paired t-test: p-value = 0.74**

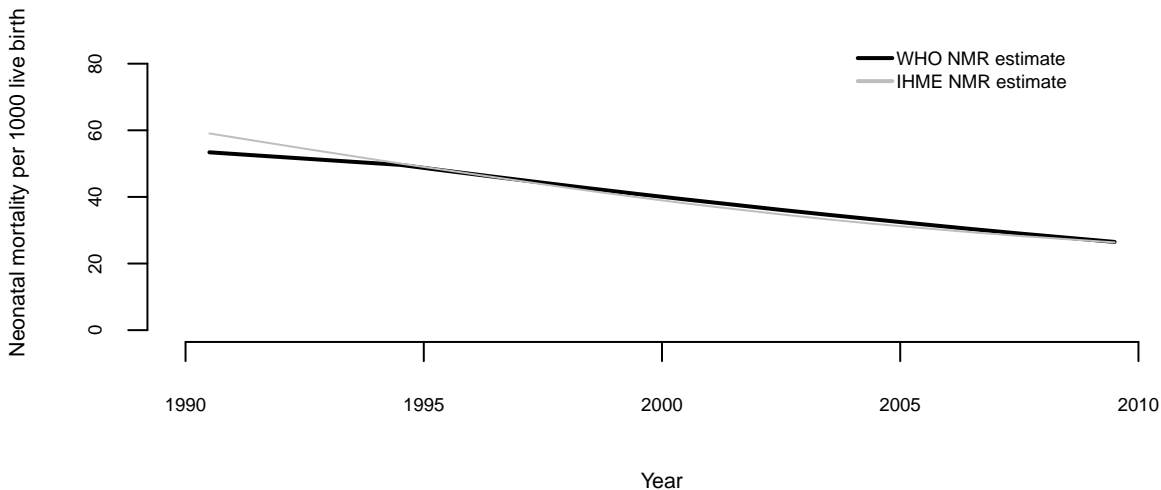

**Nepal**  
**Percentage difference between WHO and IHME NMR estimates**

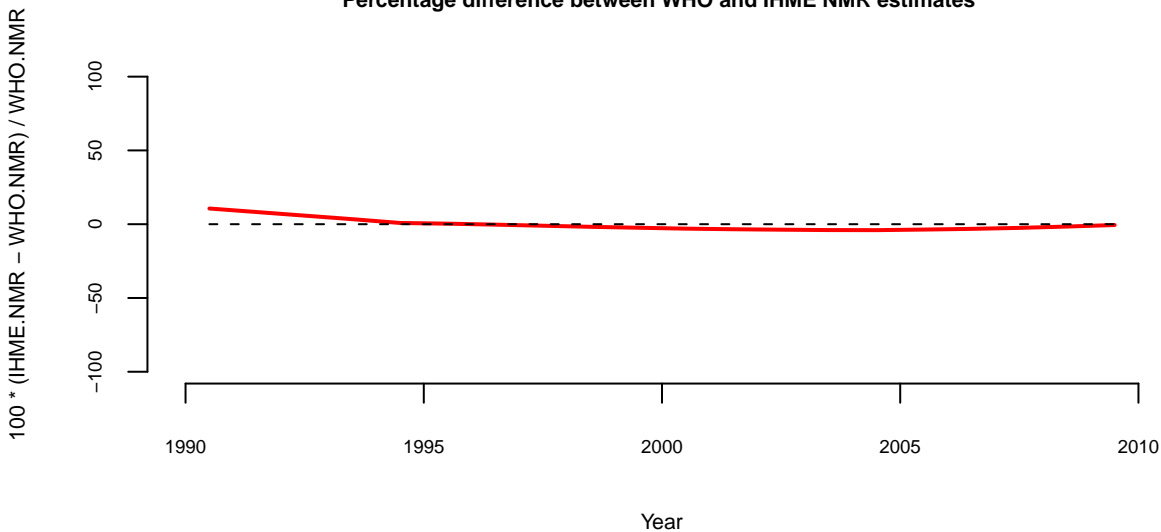

**Netherlands**  
**Paired t-test: p-value = 0.0014**

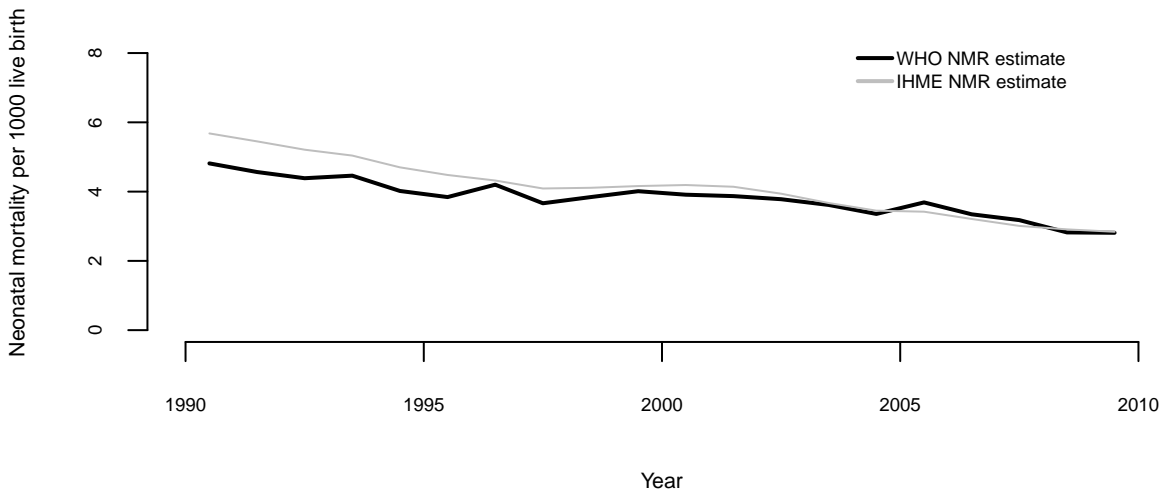

**Netherlands**  
**Percentage difference between WHO and IHME NMR estimates**

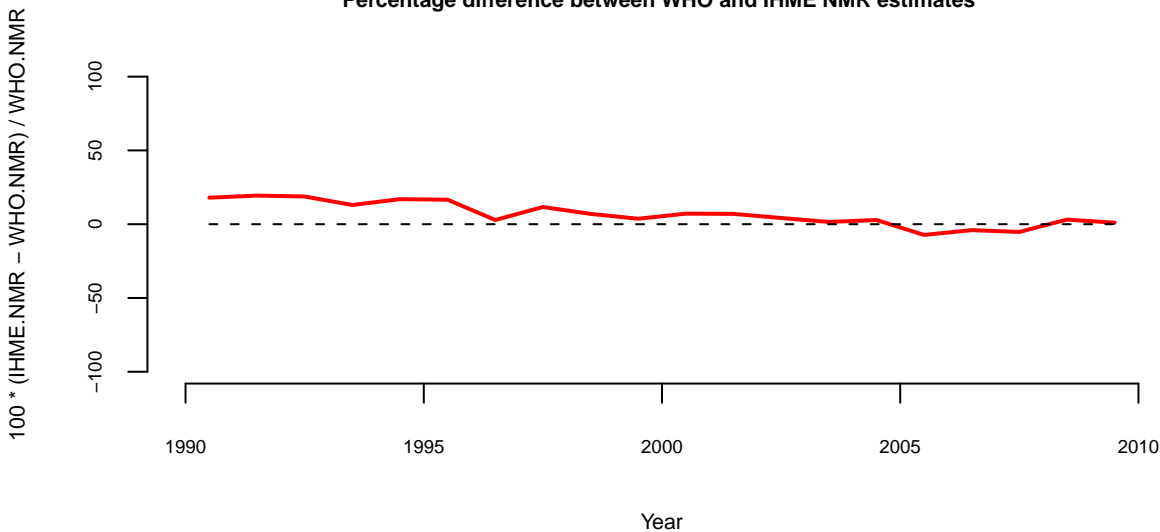

**New Zealand**  
**Paired t-test: p-value = 0.0020**

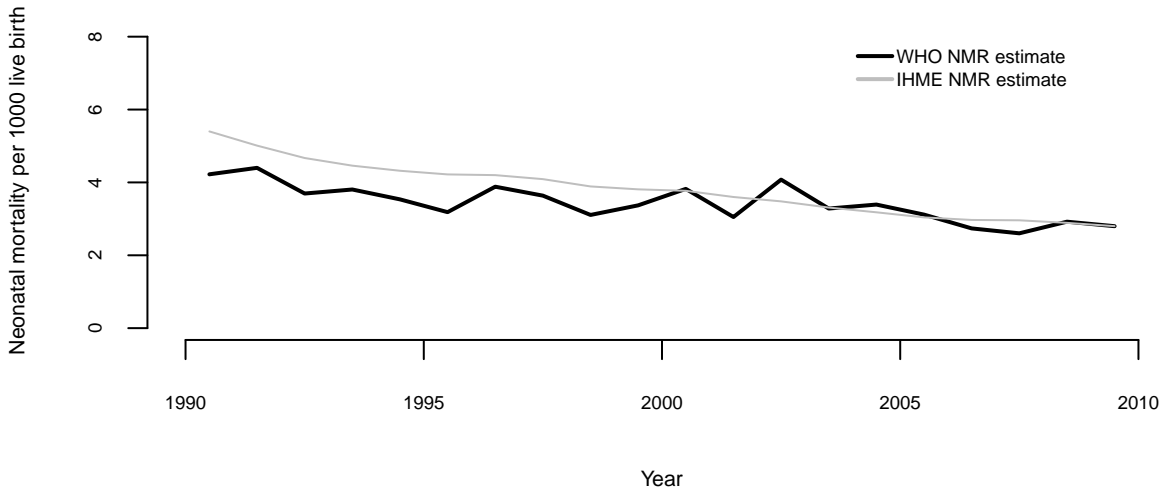

**New Zealand**  
**Percentage difference between WHO and IHME NMR estimates**

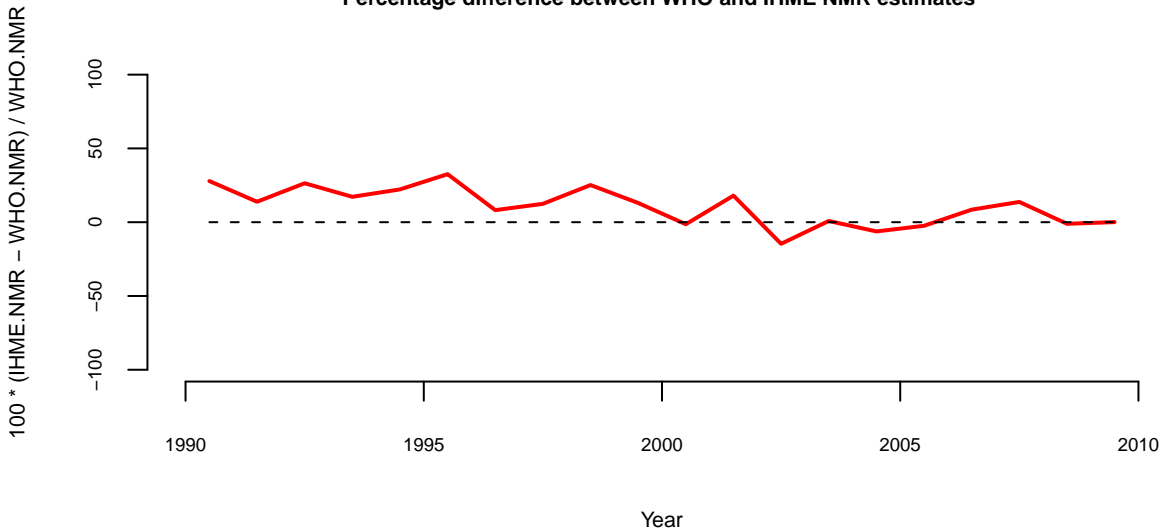

Nicaragua  
Paired t-test: p-value = 4.3e-08

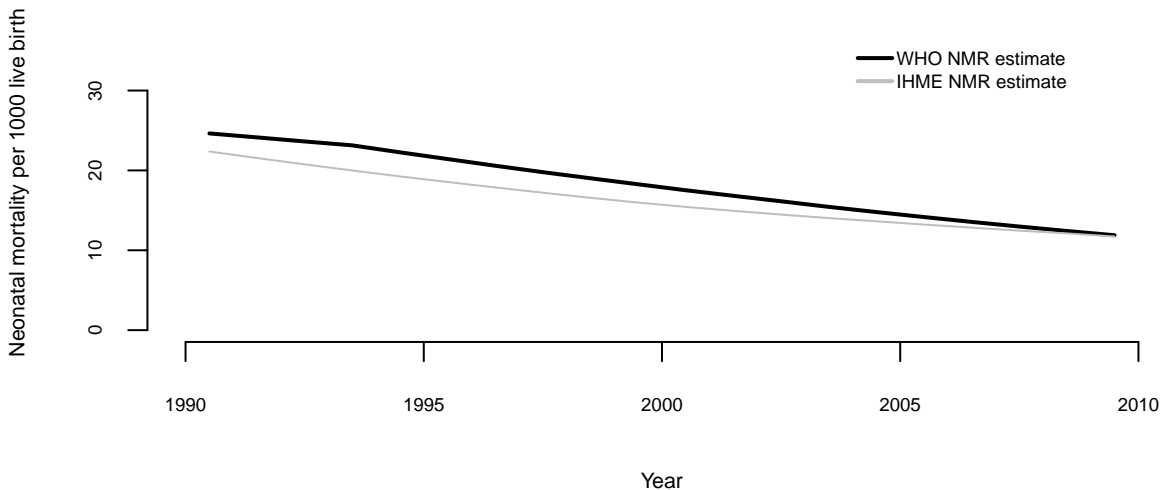

Nicaragua  
Percentage difference between WHO and IHME NMR estimates

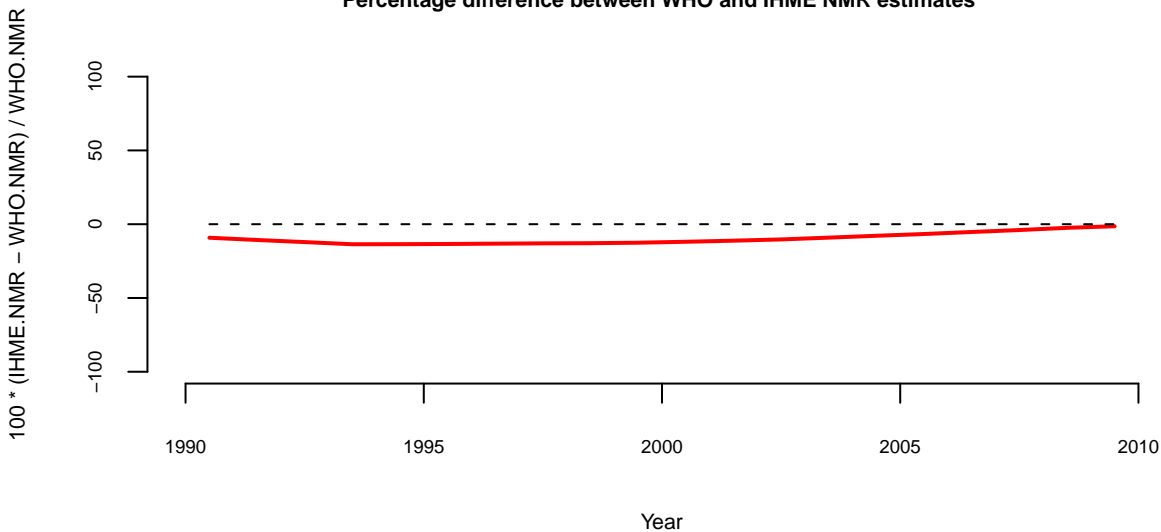

**Niger**  
**Paired t-test: p-value = 0.63**

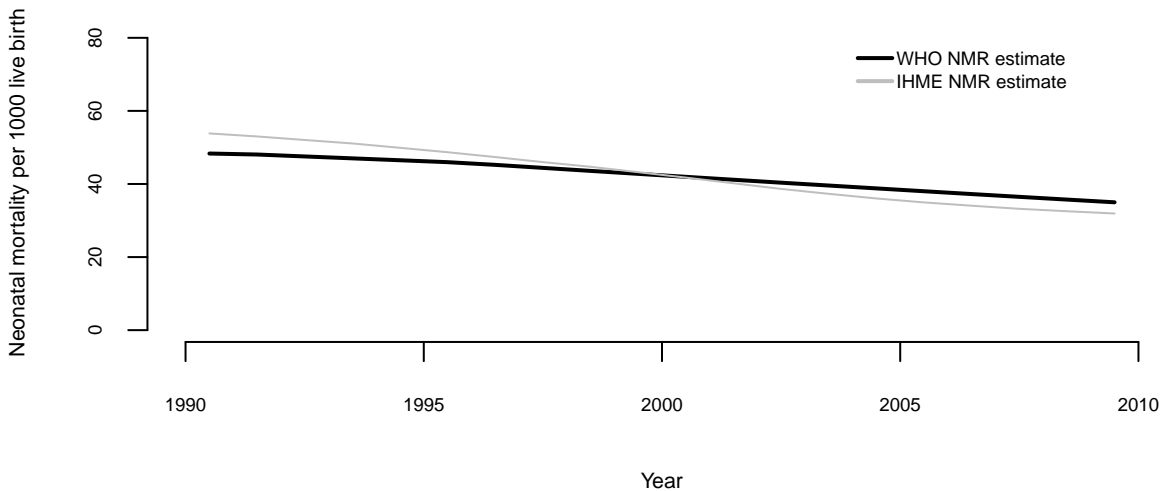

**Niger**  
**Percentage difference between WHO and IHME NMR estimates**

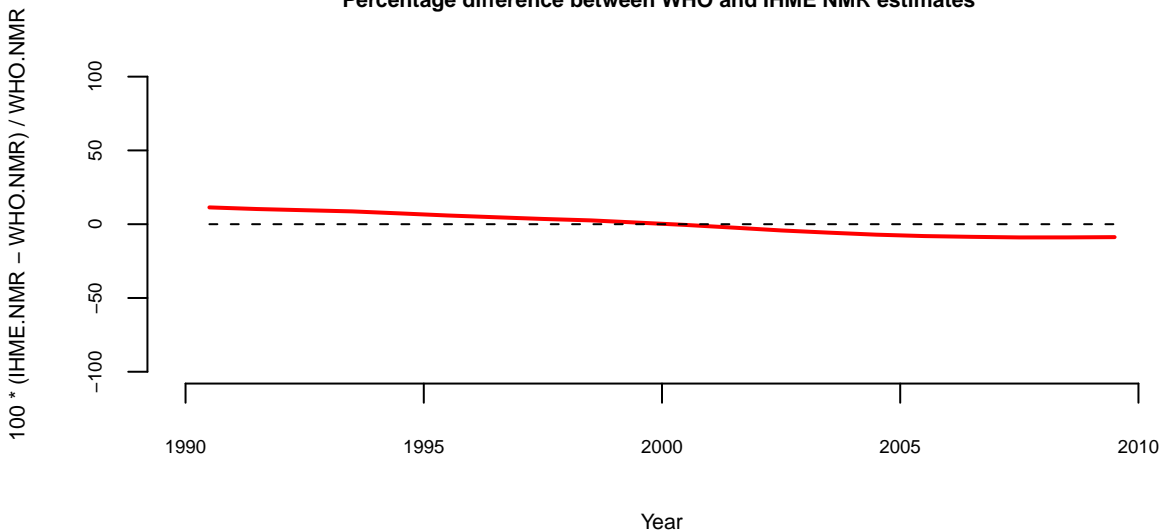

**Nigeria**  
**Paired t-test: p-value = 0.46**

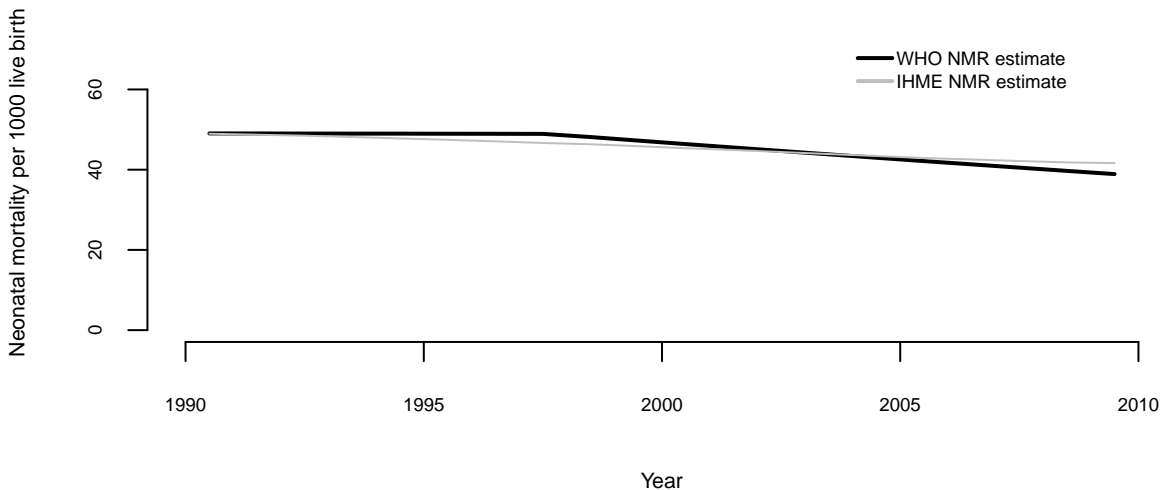

**Nigeria**  
**Percentage difference between WHO and IHME NMR estimates**

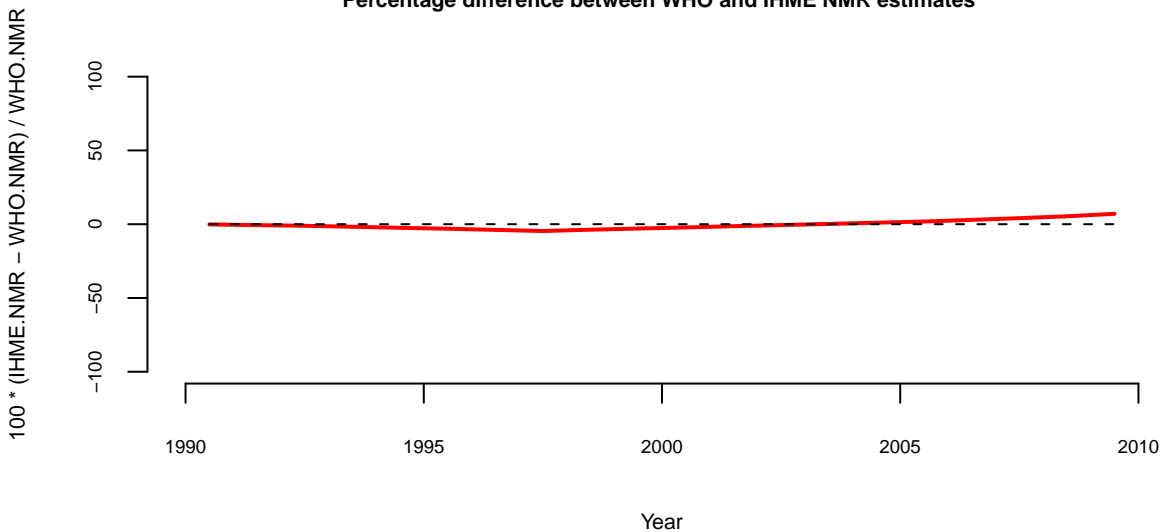

Norway  
Paired t-test: p-value = 0.0010

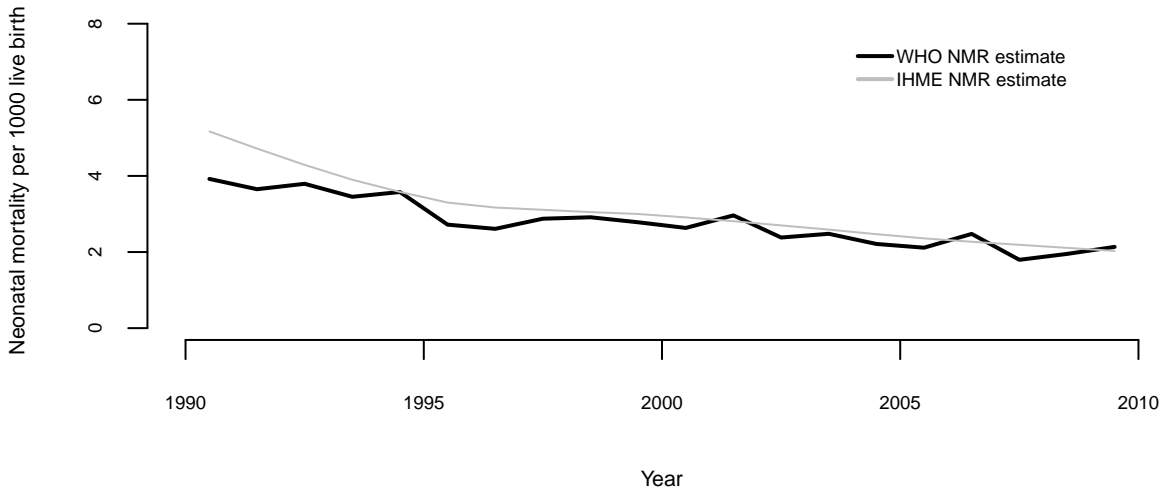

Norway  
Percentage difference between WHO and IHME NMR estimates

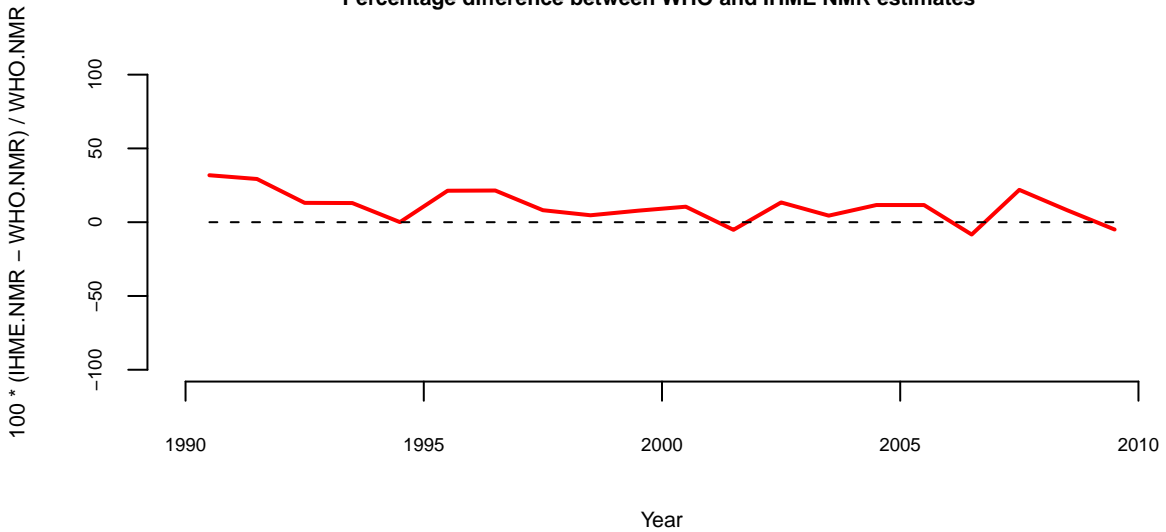

**Oman**  
**Paired t-test: p-value = 0.0013**

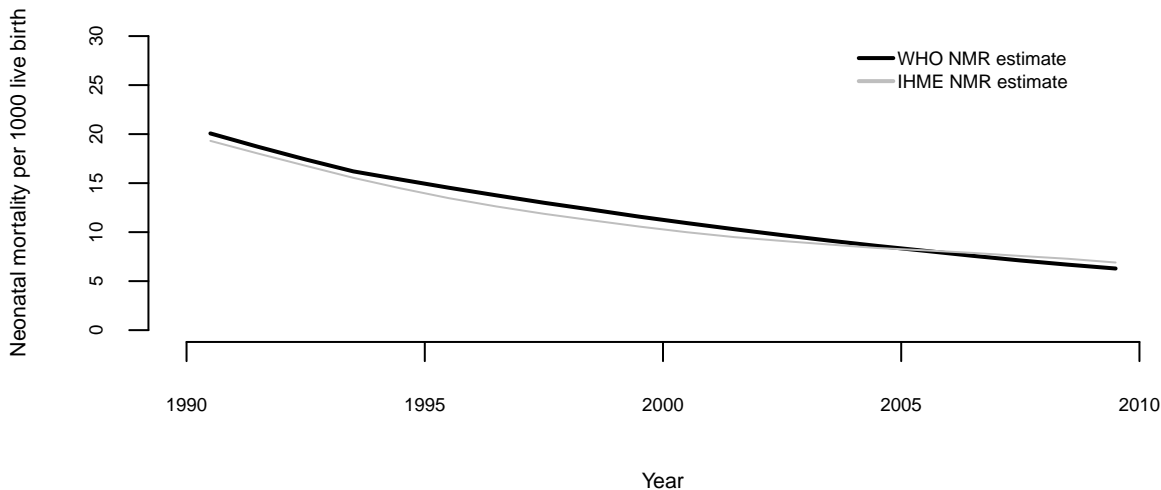

**Oman**  
**Percentage difference between WHO and IHME NMR estimates**

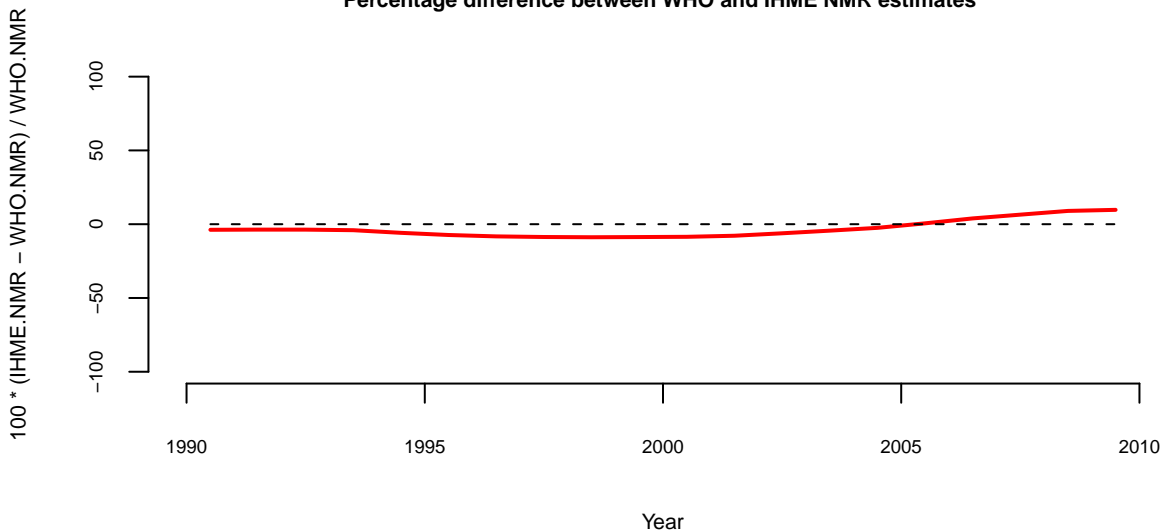

**Pakistan**  
**Paired t-test: p-value = 2.9e-08**

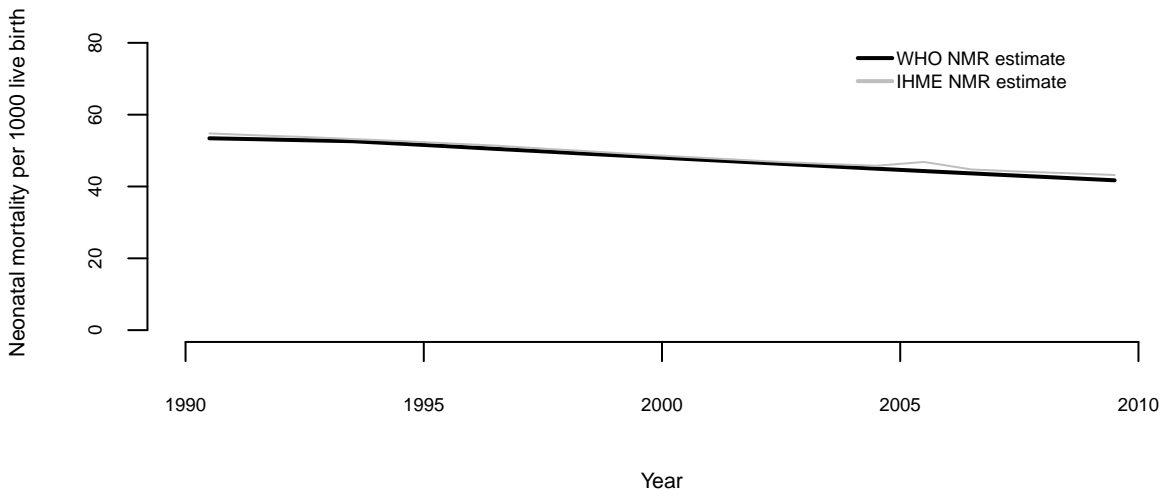

**Pakistan**  
**Percentage difference between WHO and IHME NMR estimates**

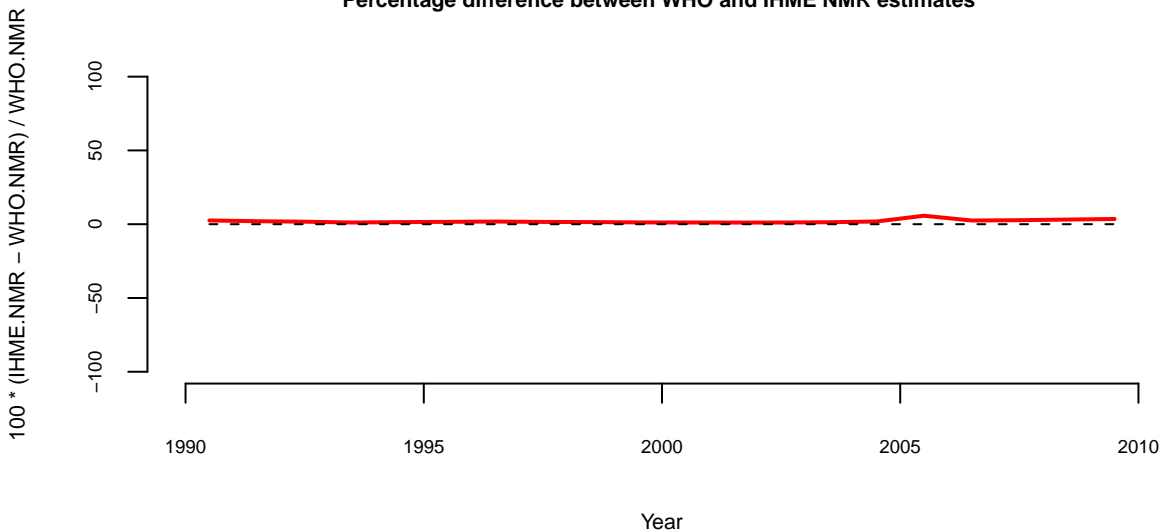

**Panama**  
**Paired t-test: p-value = 2e-09**

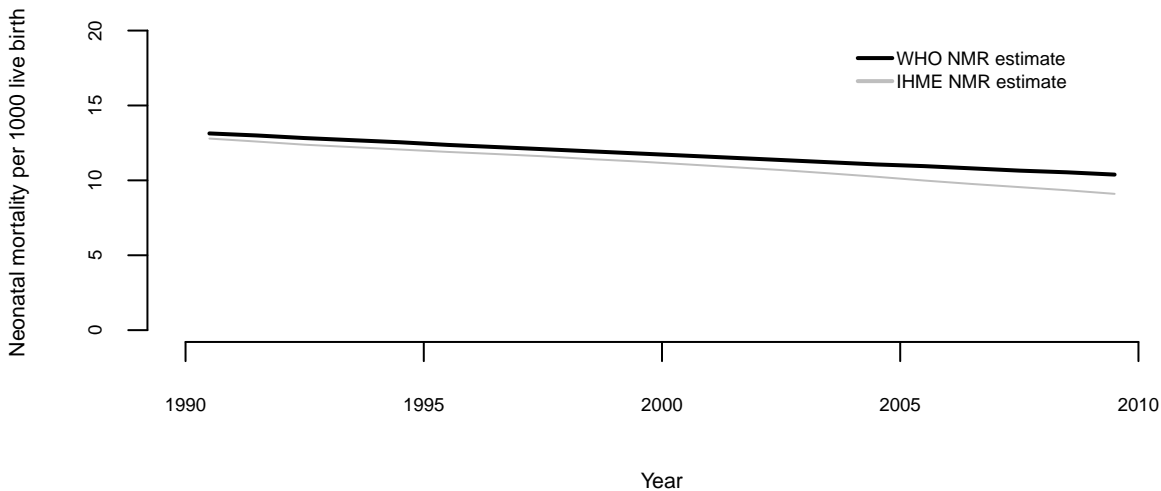

**Panama**  
**Percentage difference between WHO and IHME NMR estimates**

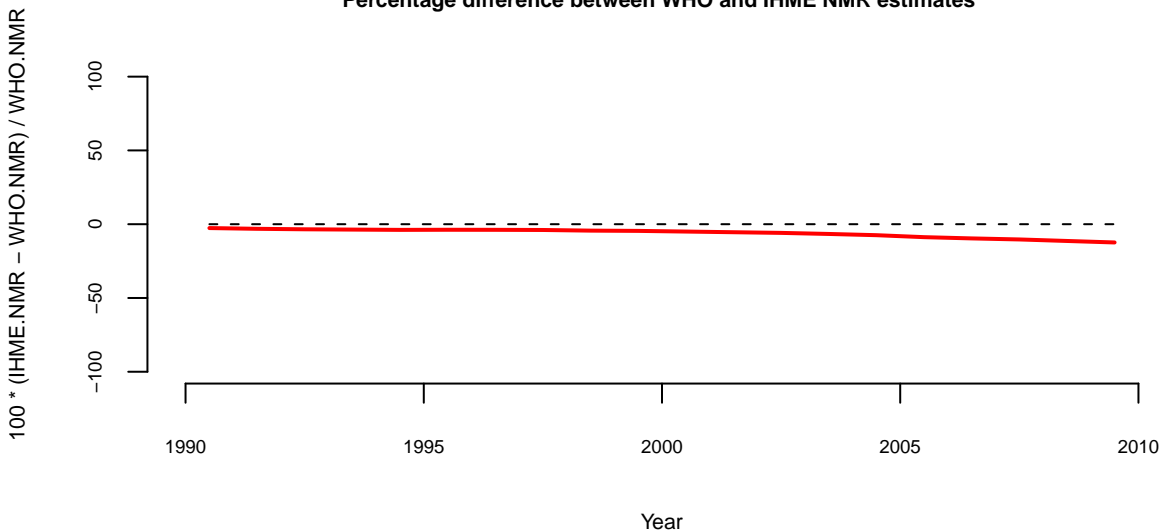

**Papua New Guinea**  
**Paired t-test: p-value = 1.4e-28**

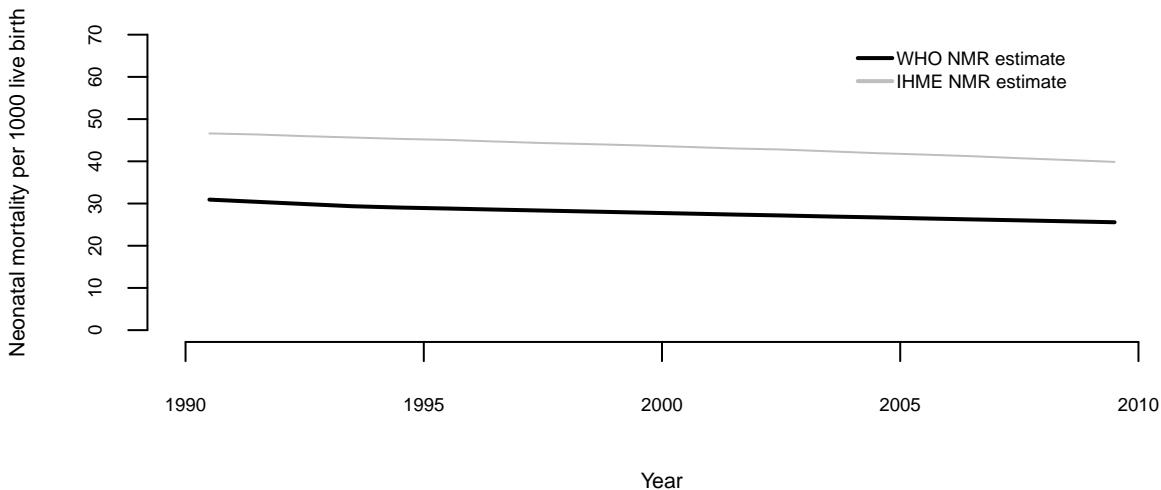

**Papua New Guinea**  
**Percentage difference between WHO and IHME NMR estimates**

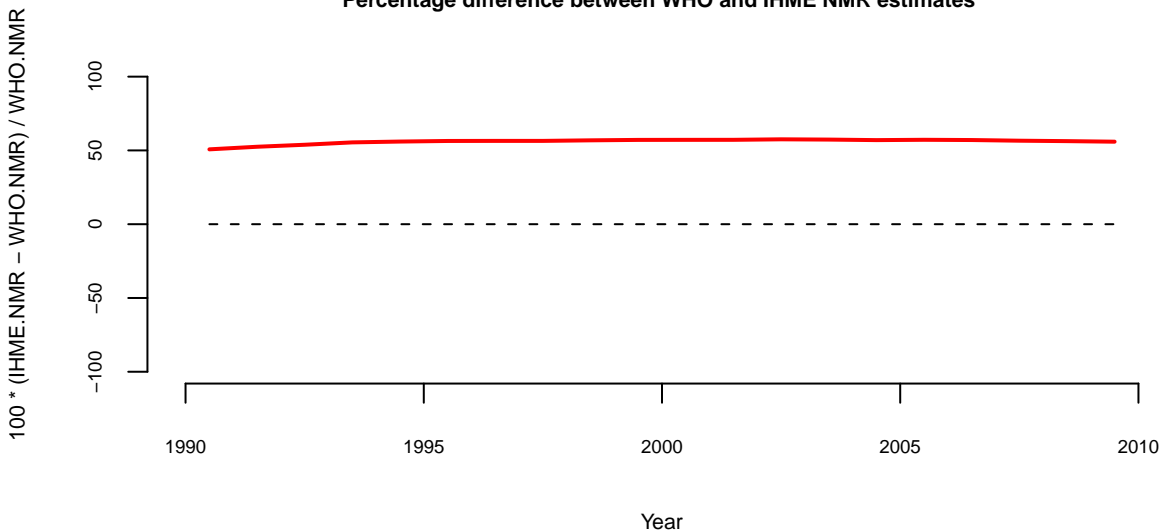

**Paraguay**  
**Paired t-test: p-value = 4.2e-14**

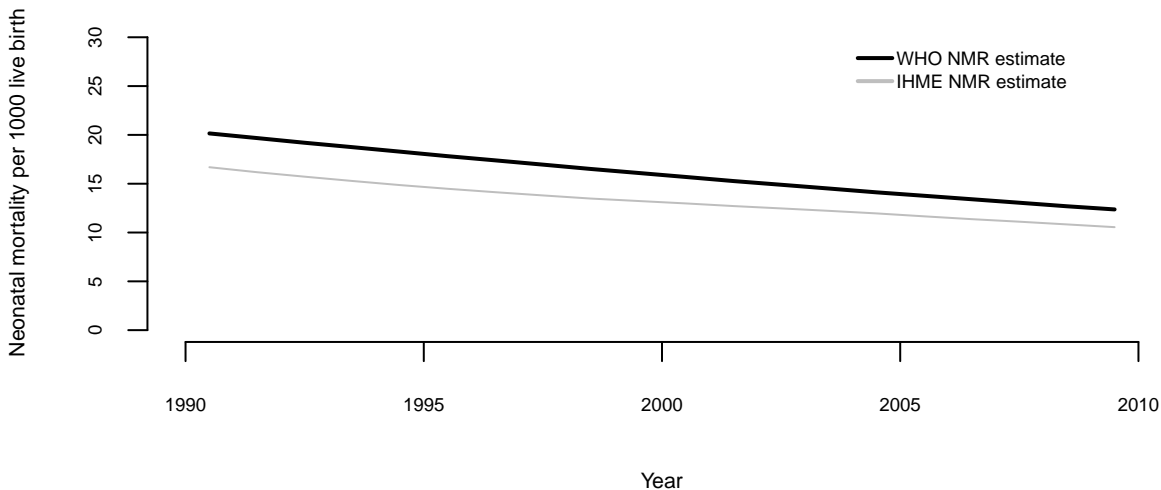

**Paraguay**  
**Percentage difference between WHO and IHME NMR estimates**

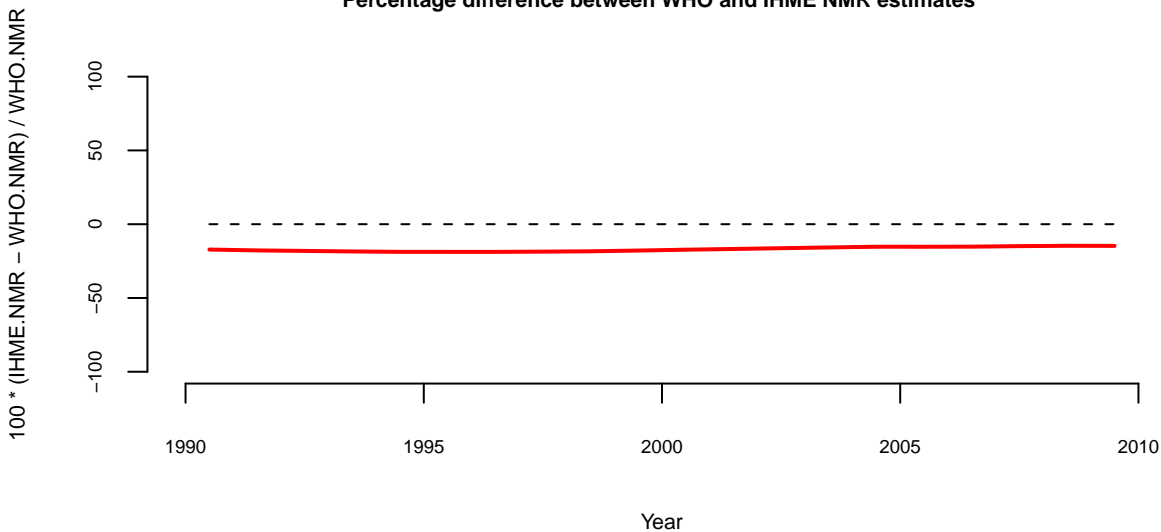

Peru  
Paired t-test: p-value = 0.0013

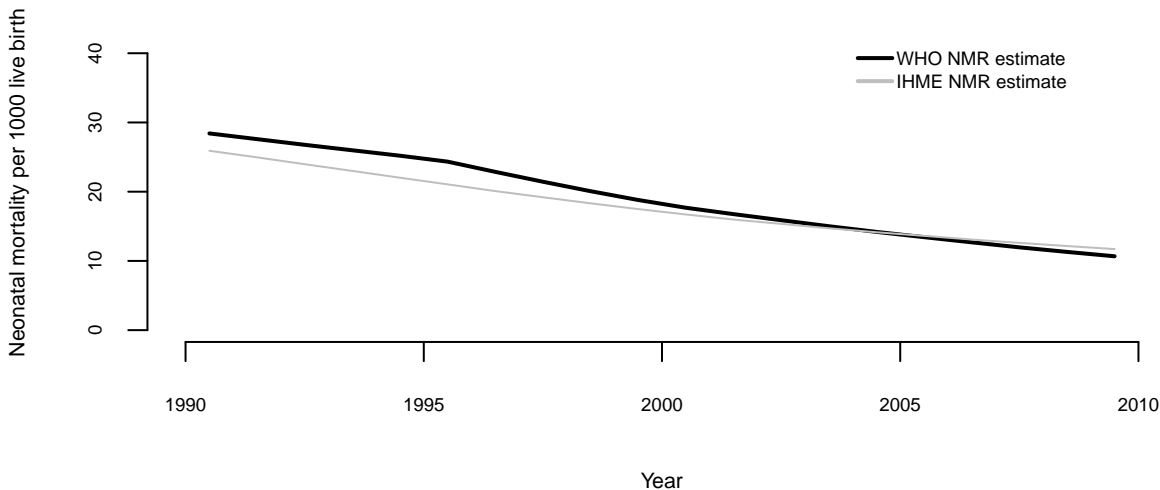

Peru  
Percentage difference between WHO and IHME NMR estimates

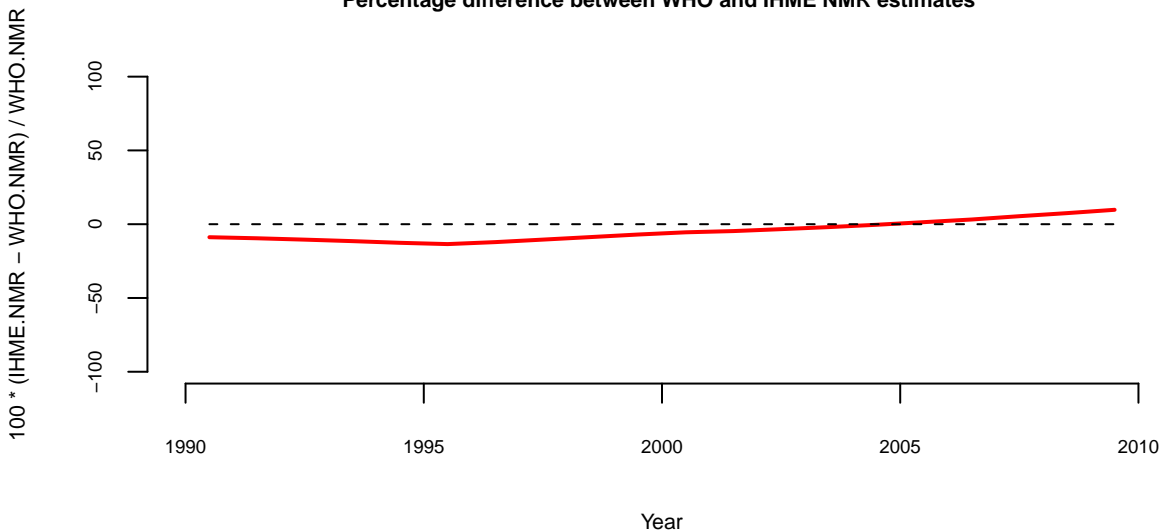

**Philippines**  
**Paired t-test: p-value = 6.8e-06**

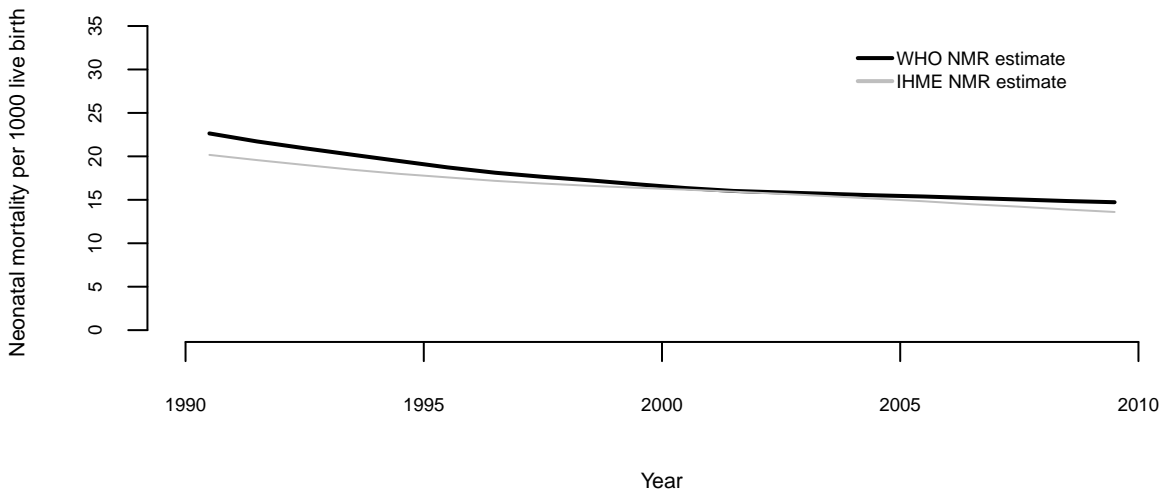

**Philippines**  
**Percentage difference between WHO and IHME NMR estimates**

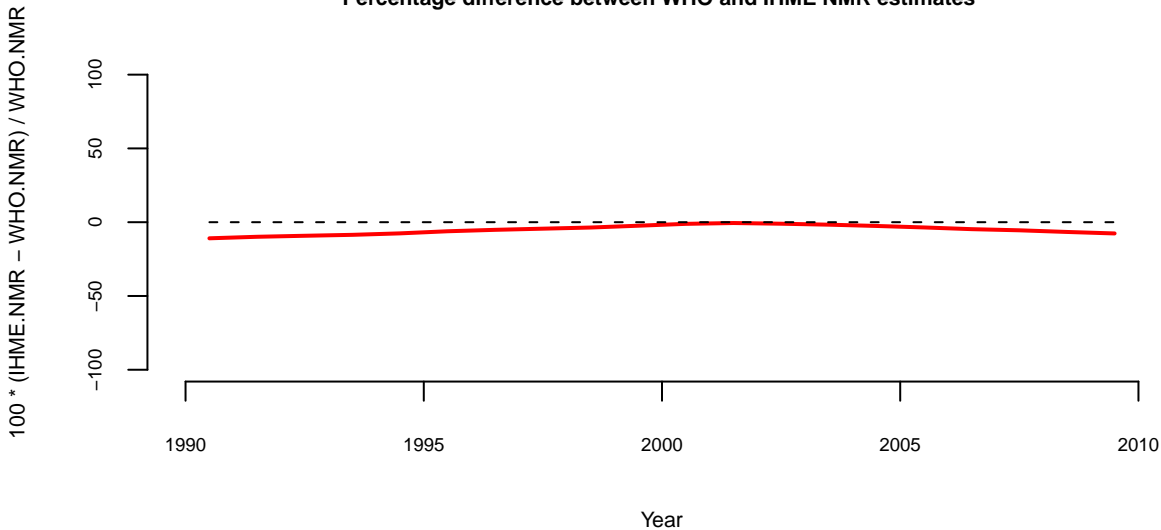

**Poland**  
**Paired t-test: p-value = 0.013**

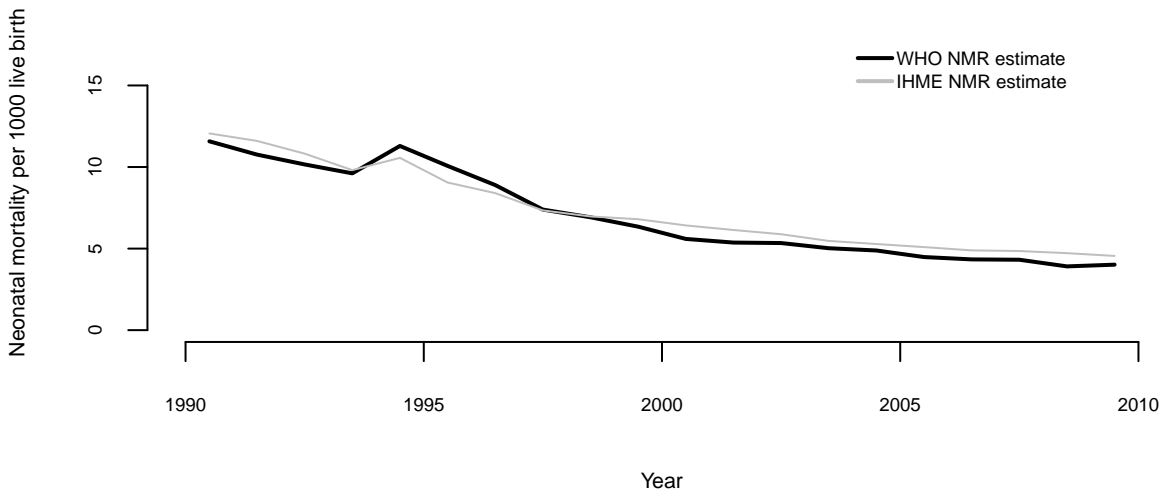

**Poland**  
**Percentage difference between WHO and IHME NMR estimates**

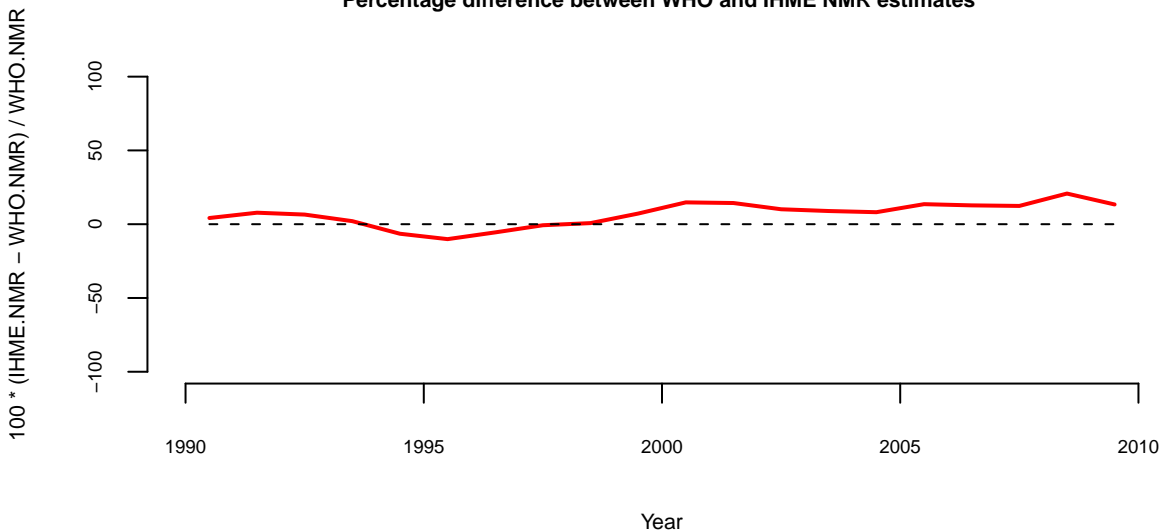

**Portugal**  
**Paired t-test: p-value = 2.7e-06**

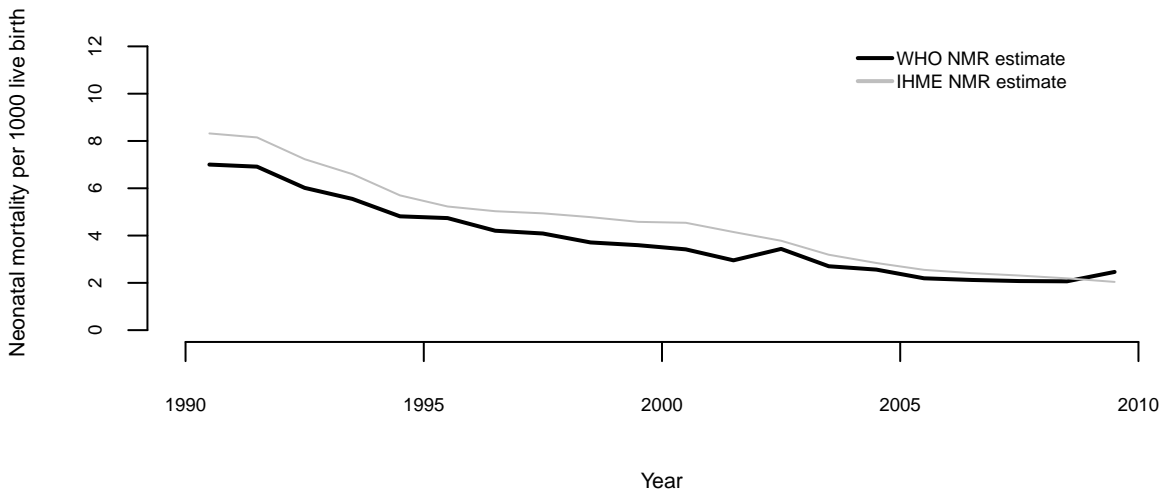

**Portugal**  
**Percentage difference between WHO and IHME NMR estimates**

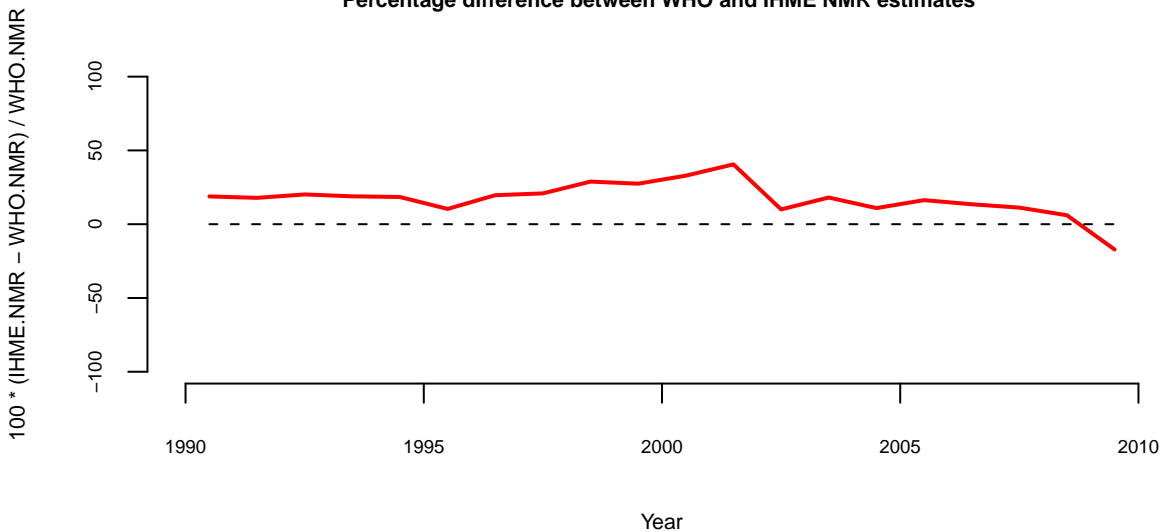

**Qatar**  
**Paired t-test: p-value = 1.9e-11**

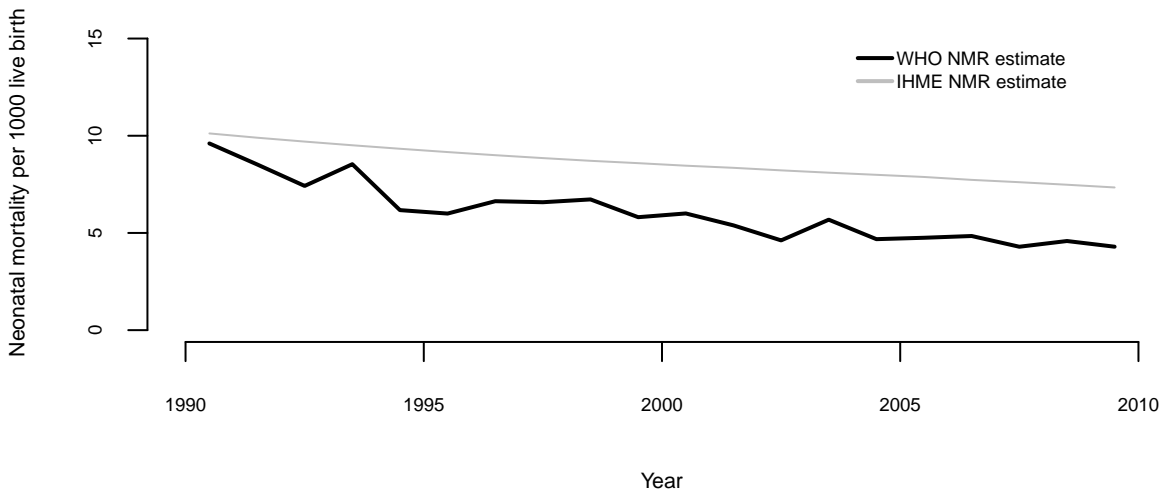

**Qatar**  
**Percentage difference between WHO and IHME NMR estimates**

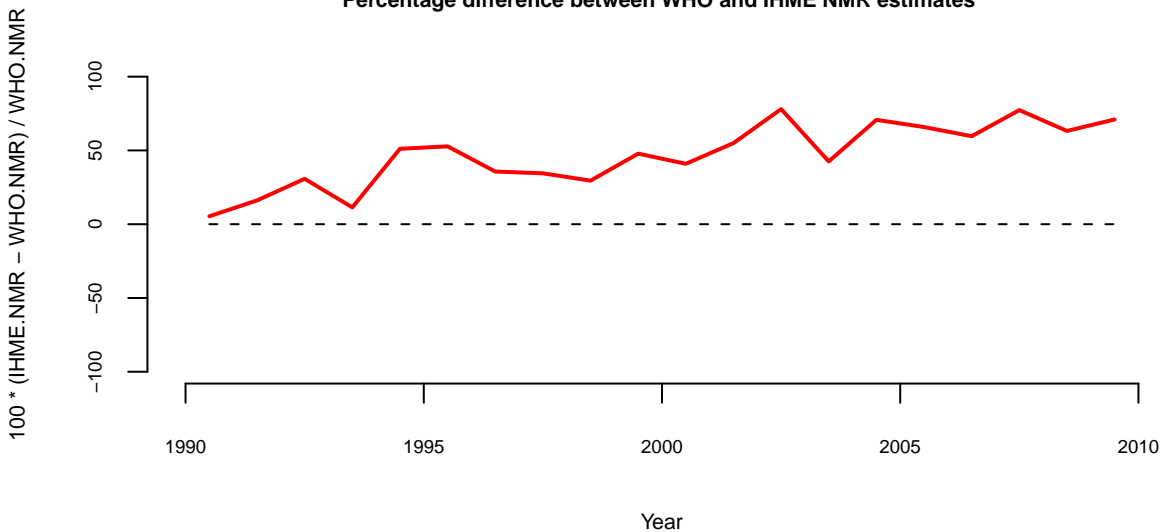

**Republic of Korea**  
**Paired t-test: p-value = 4.8e-14**

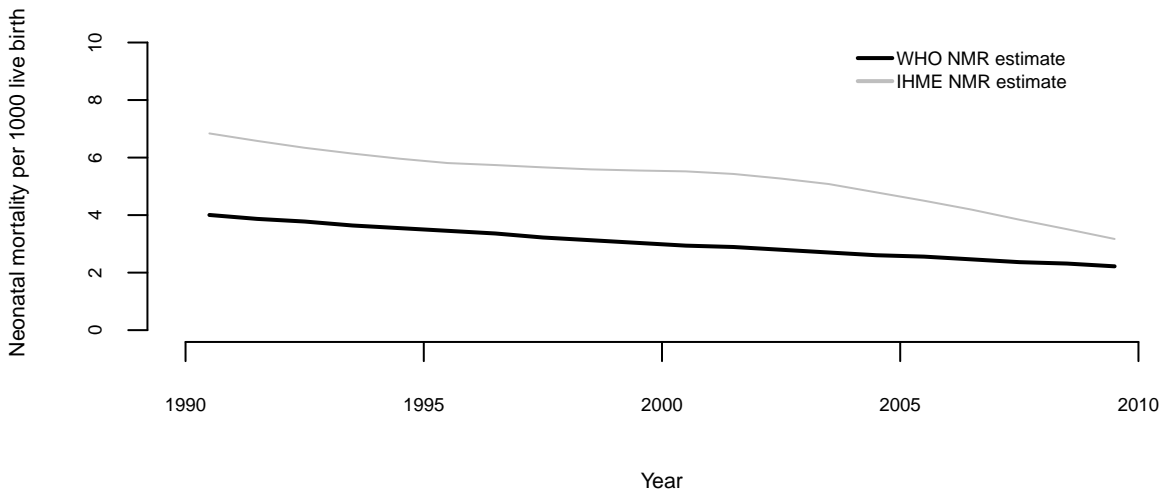

**Republic of Korea**  
**Percentage difference between WHO and IHME NMR estimates**

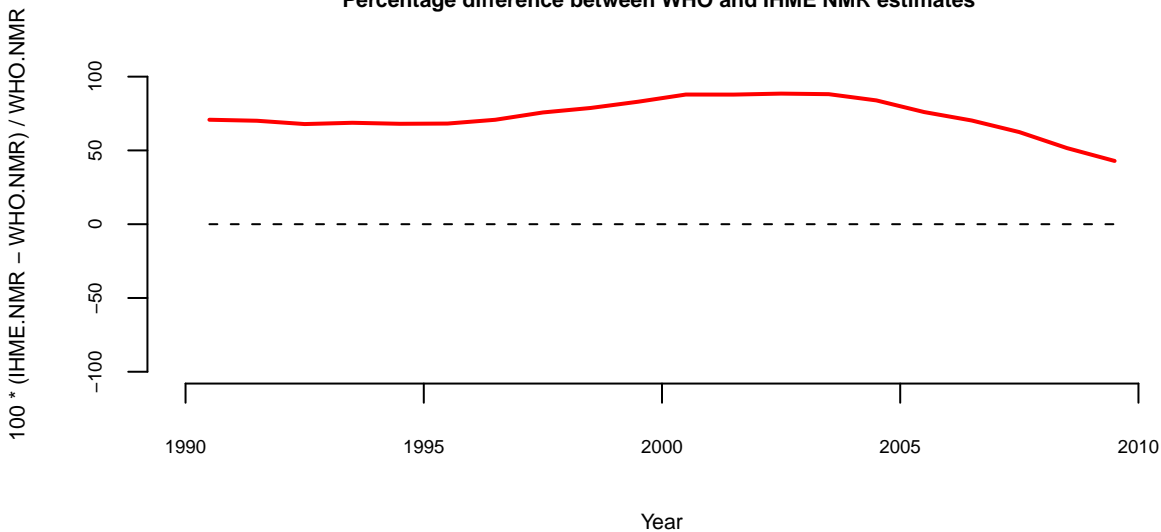

Republic of Moldova  
Paired t-test: p-value = 0.65

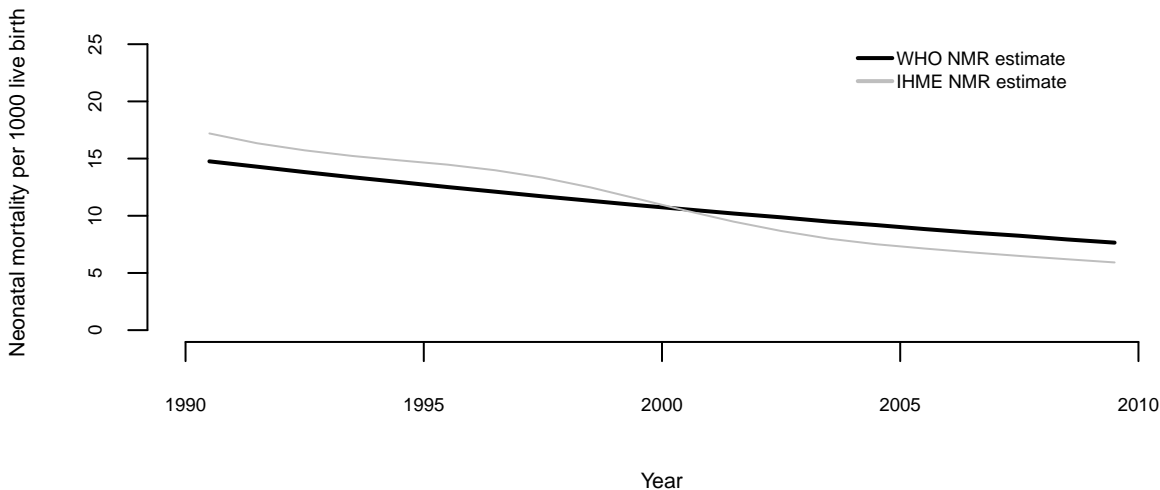

Republic of Moldova  
Percentage difference between WHO and IHME NMR estimates

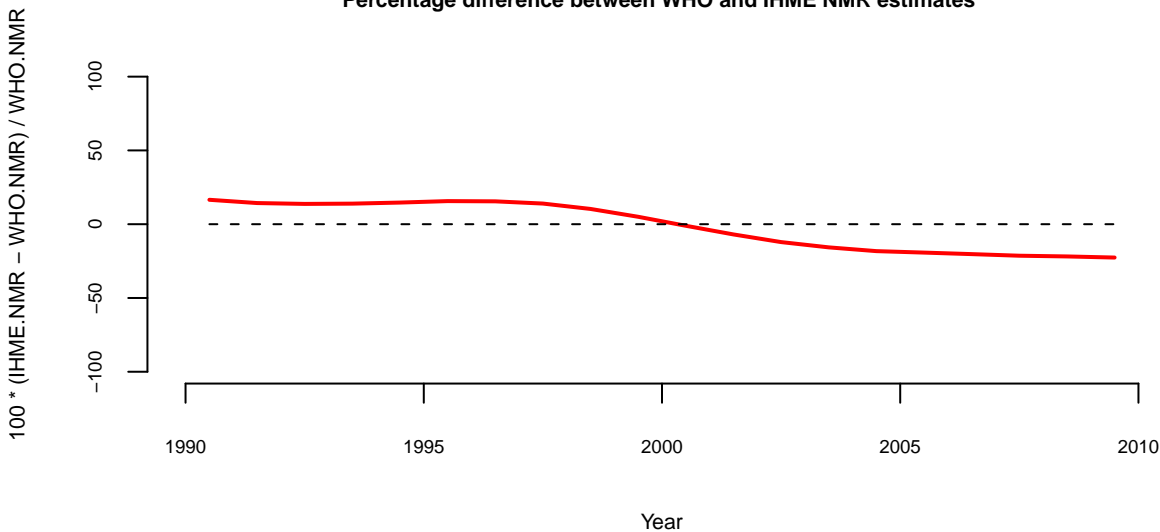

**Romania**  
**Paired t-test: p-value = 0.51**

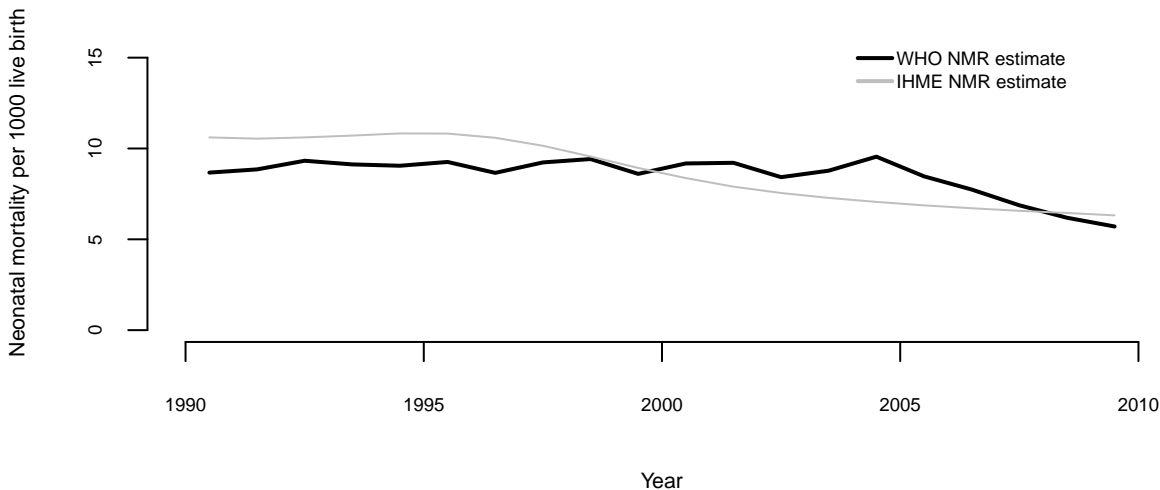

**Romania**  
**Percentage difference between WHO and IHME NMR estimates**

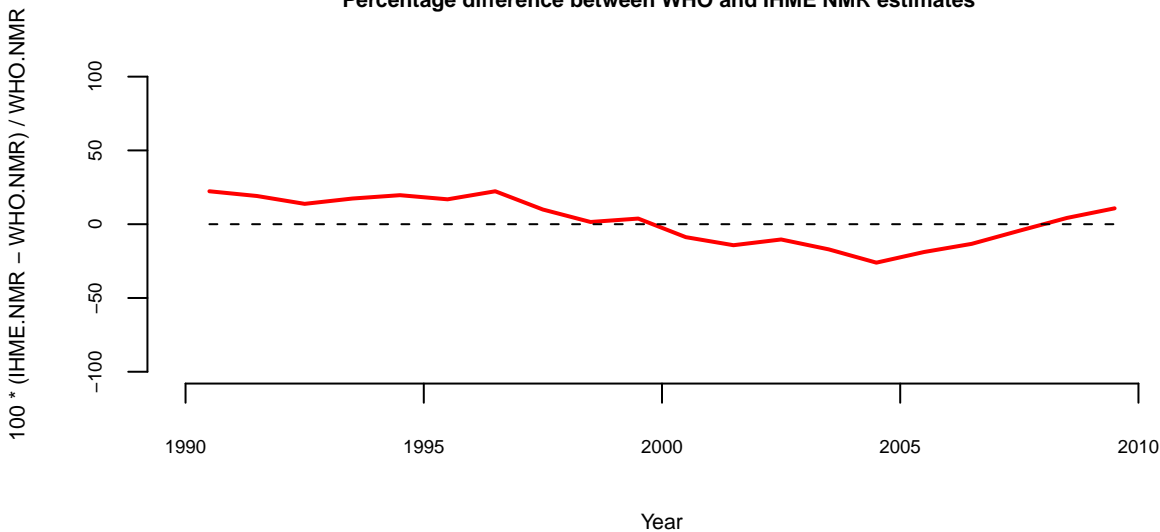

**Russian Federation**  
**Paired t-test: p-value = 7e-09**

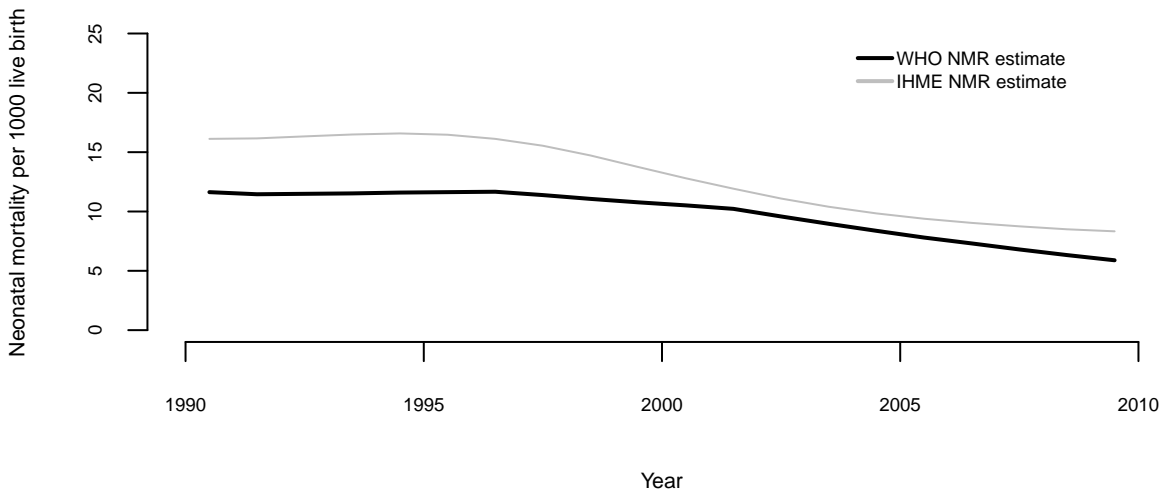

**Russian Federation**  
**Percentage difference between WHO and IHME NMR estimates**

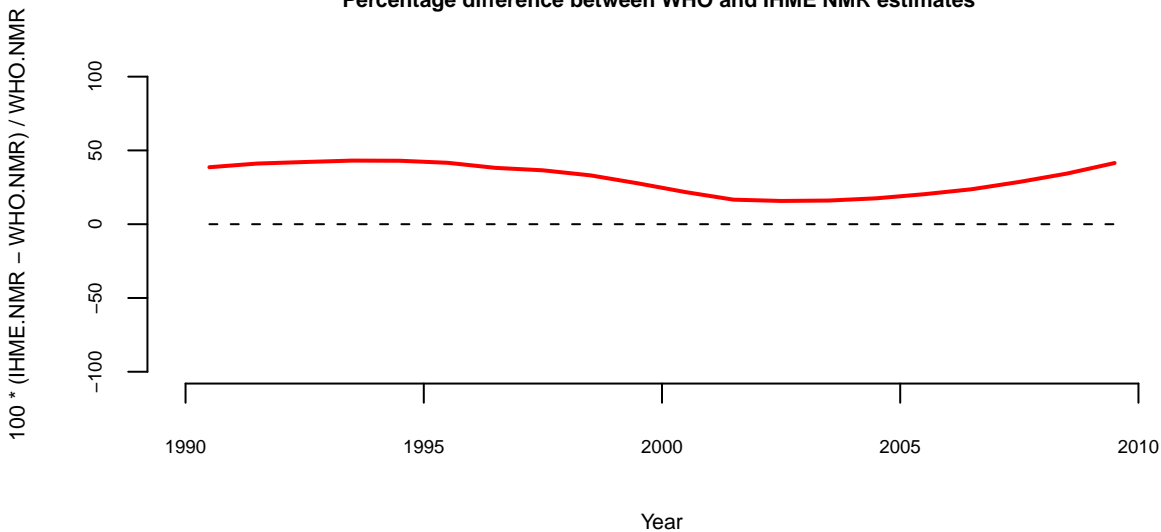

**Rwanda**  
**Paired t-test: p-value = 0.072**

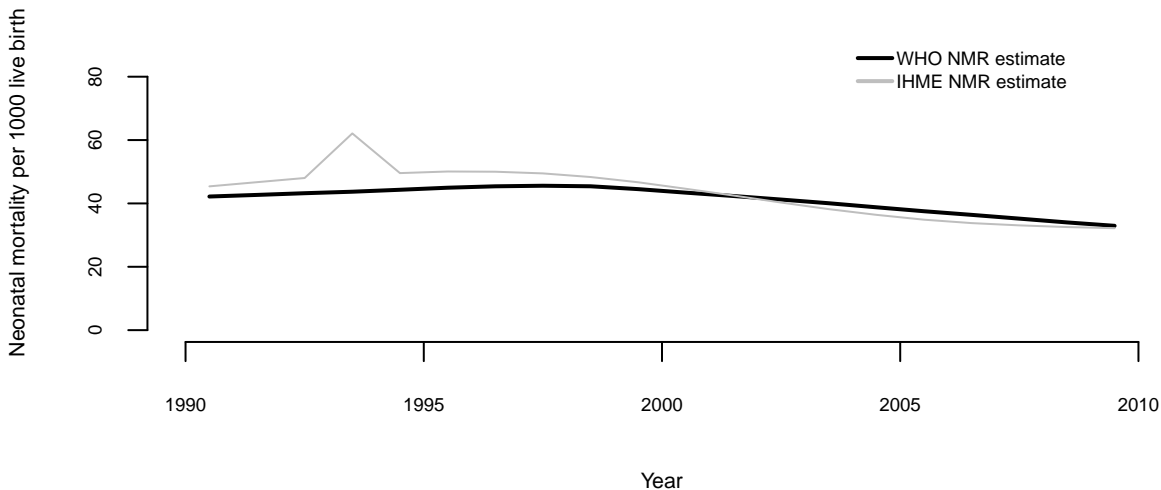

**Rwanda**  
**Percentage difference between WHO and IHME NMR estimates**

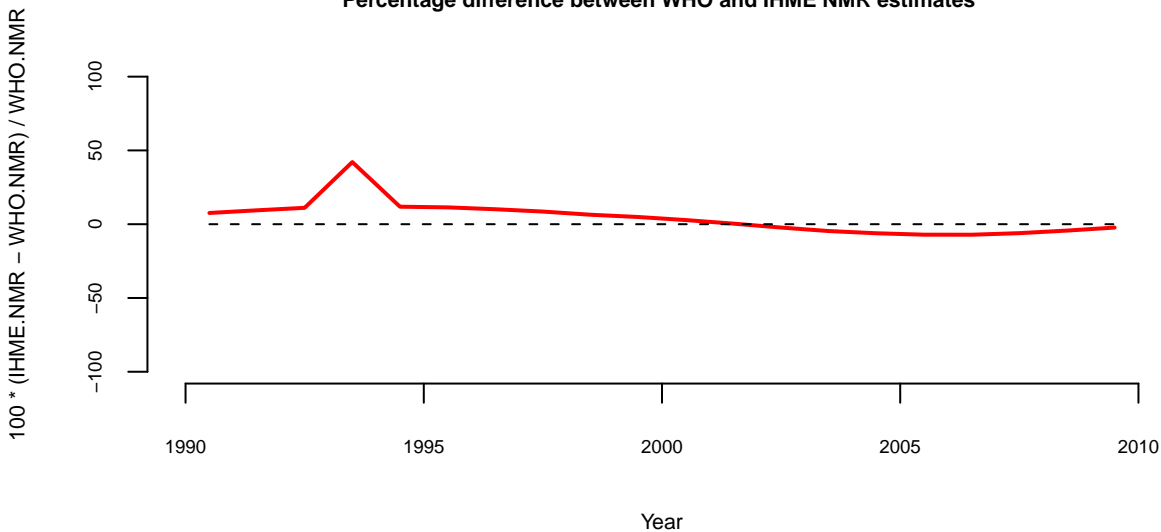

**Saint Lucia**  
**Paired t-test: p-value = 0.023**

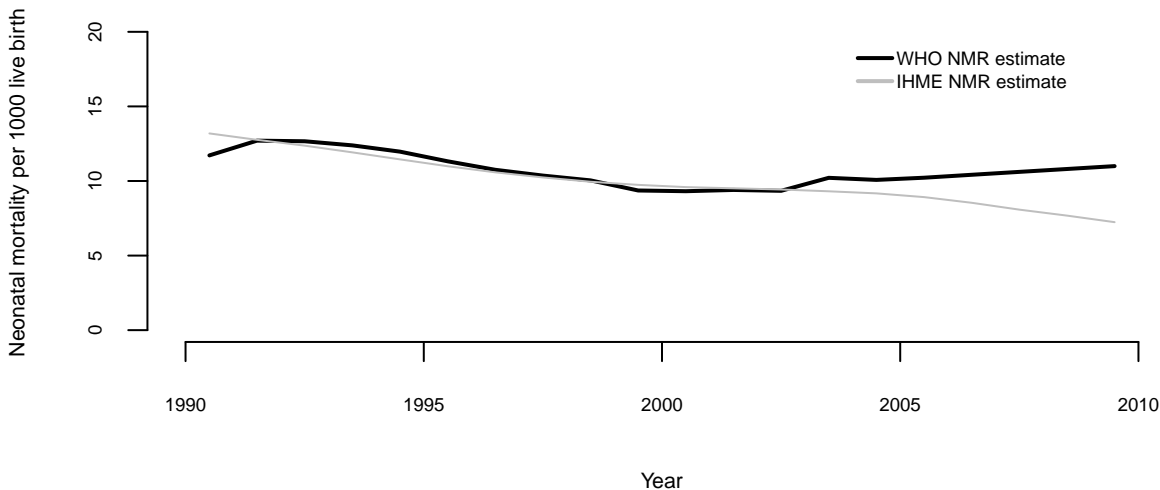

**Saint Lucia**  
**Percentage difference between WHO and IHME NMR estimates**

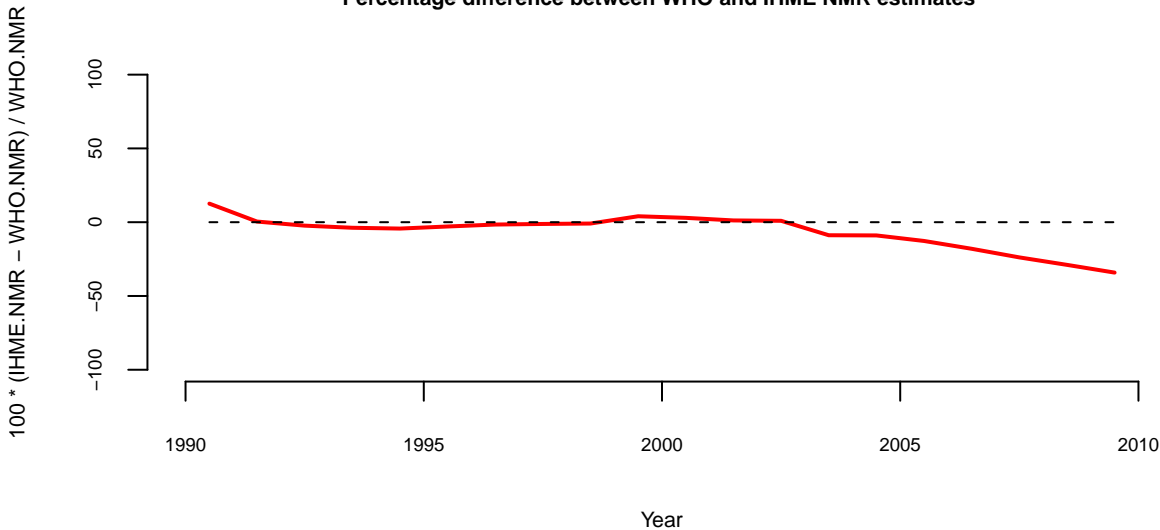

**Saint Vincent and the Grenadines**  
**Paired t-test: p-value = 0.011**

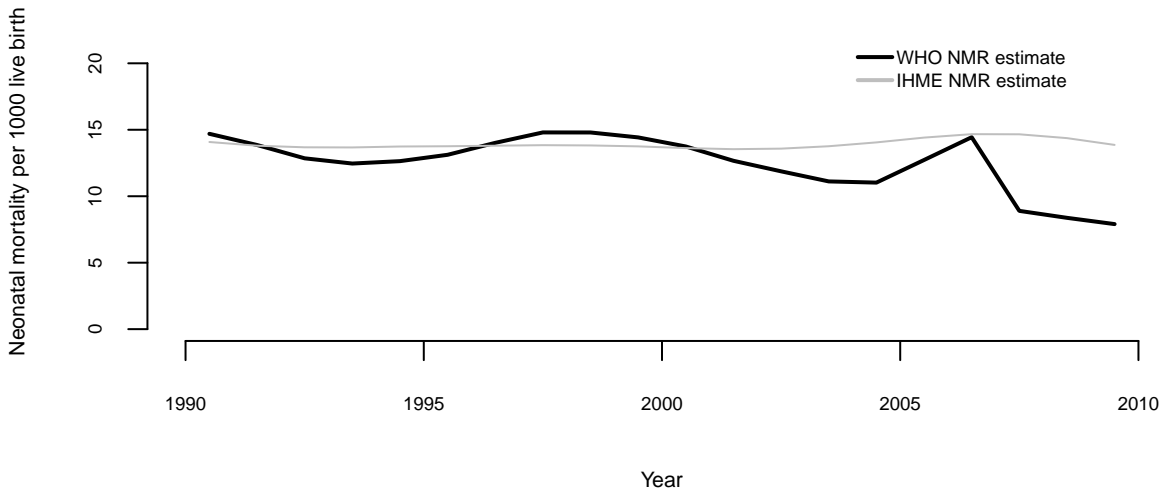

**Saint Vincent and the Grenadines**  
**Percentage difference between WHO and IHME NMR estimates**

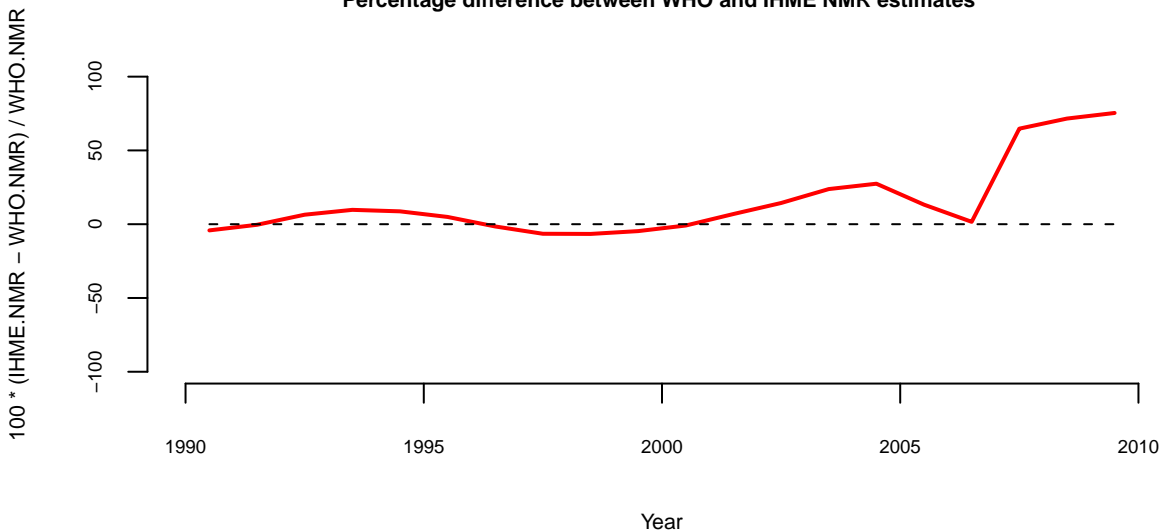

**Senegal**  
**Paired t-test: p-value = 5.2e-08**

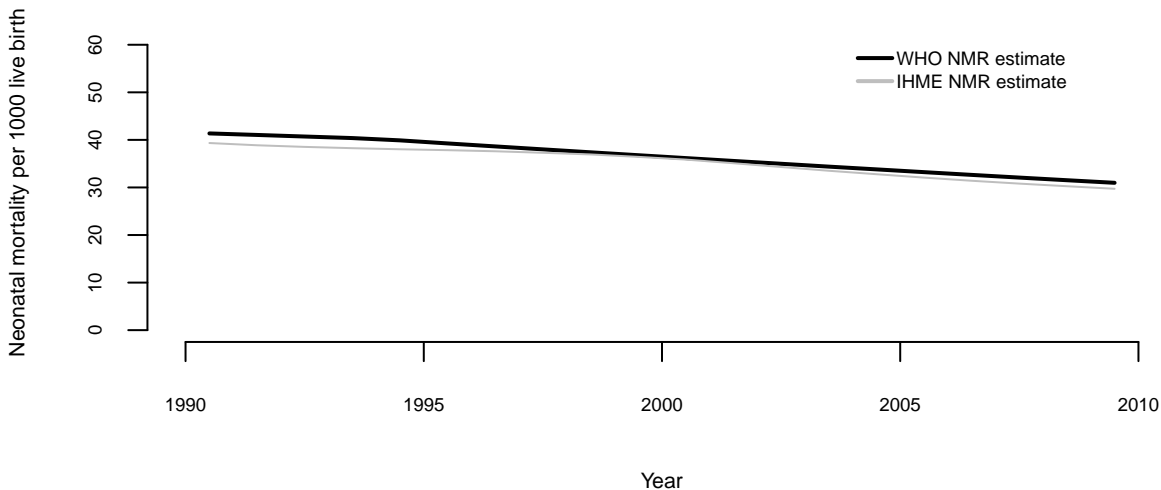

**Senegal**  
**Percentage difference between WHO and IHME NMR estimates**

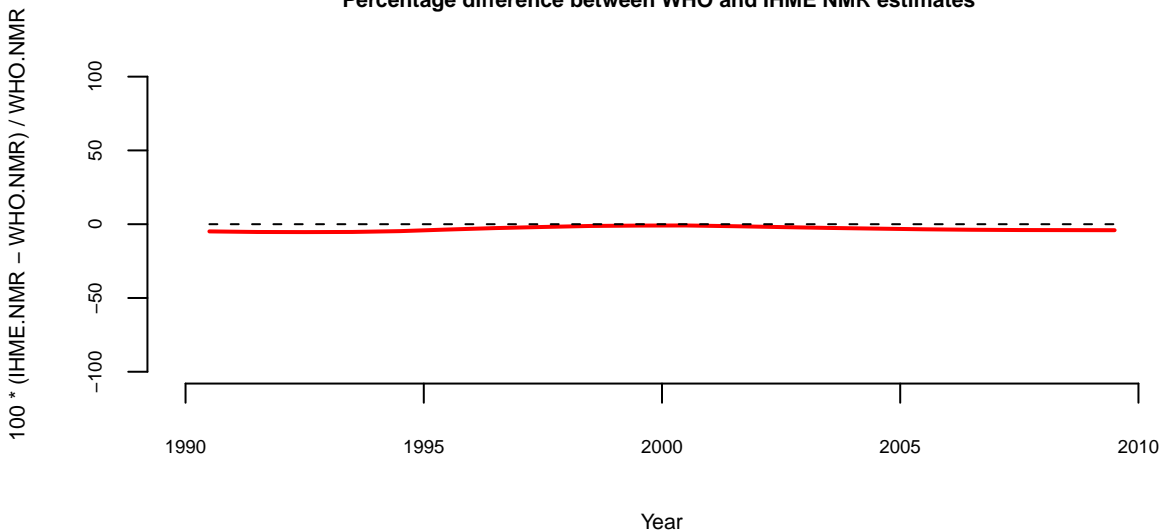

**Serbia**  
**Paired t-test: p-value = 1.3e-07**

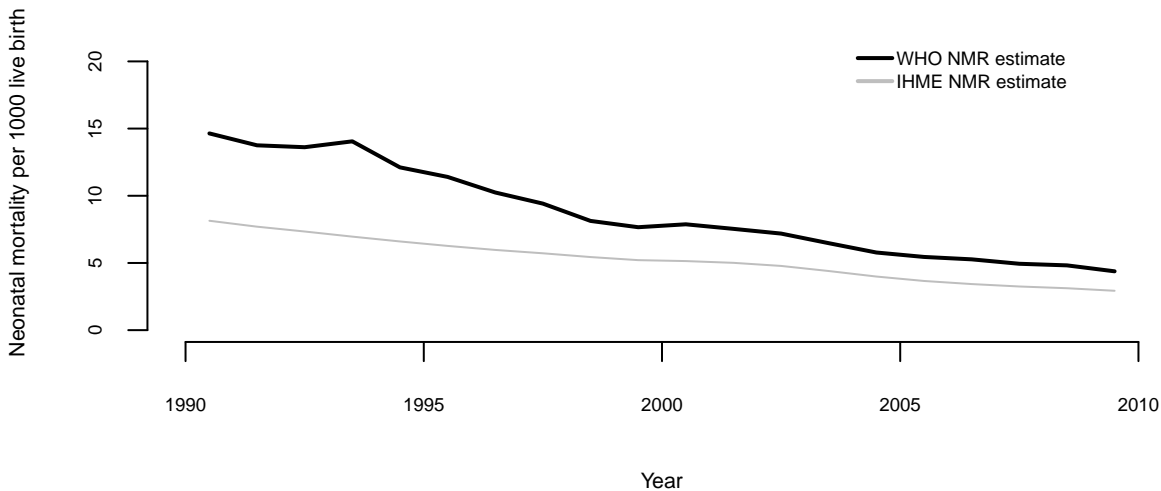

**Serbia**  
**Percentage difference between WHO and IHME NMR estimates**

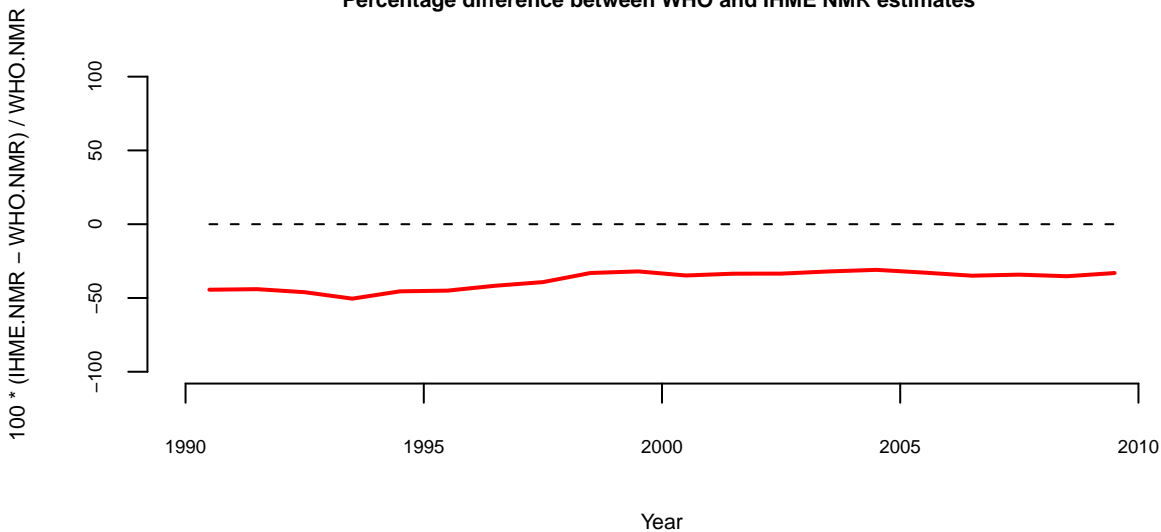

**Seychelles**  
**Paired t-test: p-value = 2.8e-10**

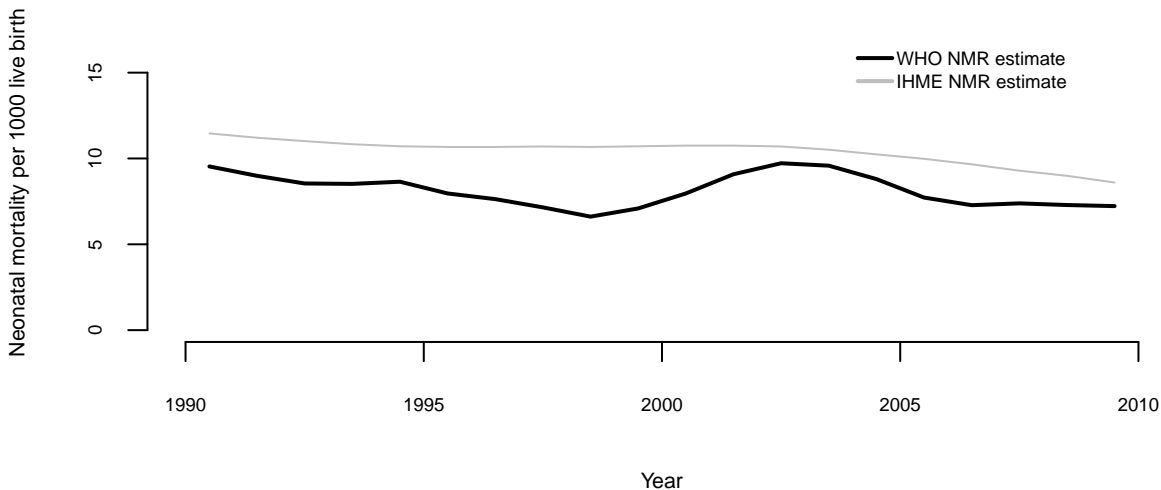

**Seychelles**  
**Percentage difference between WHO and IHME NMR estimates**

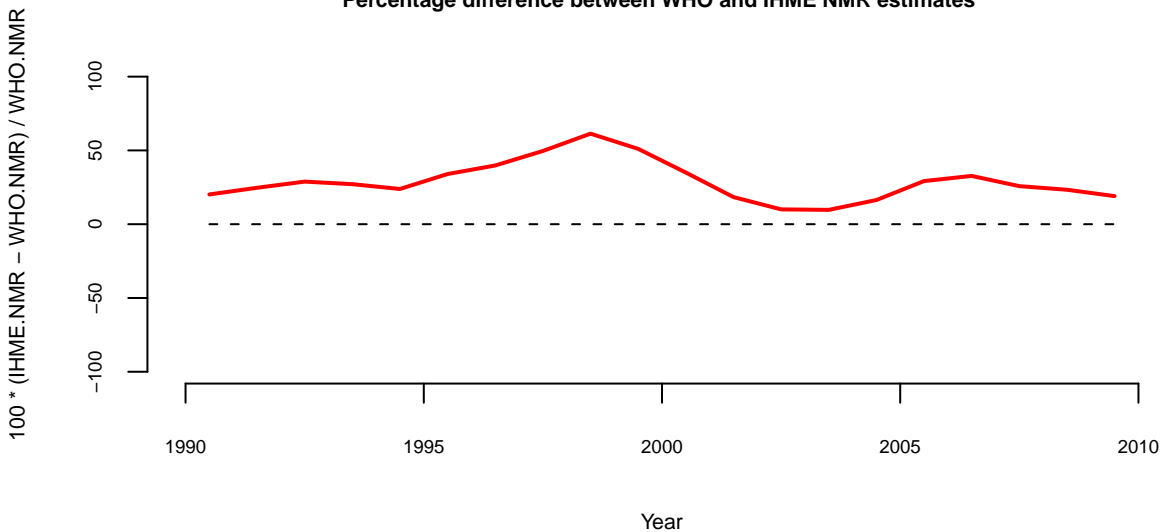

**Sierra Leone**  
**Paired t-test: p-value = 0.00026**

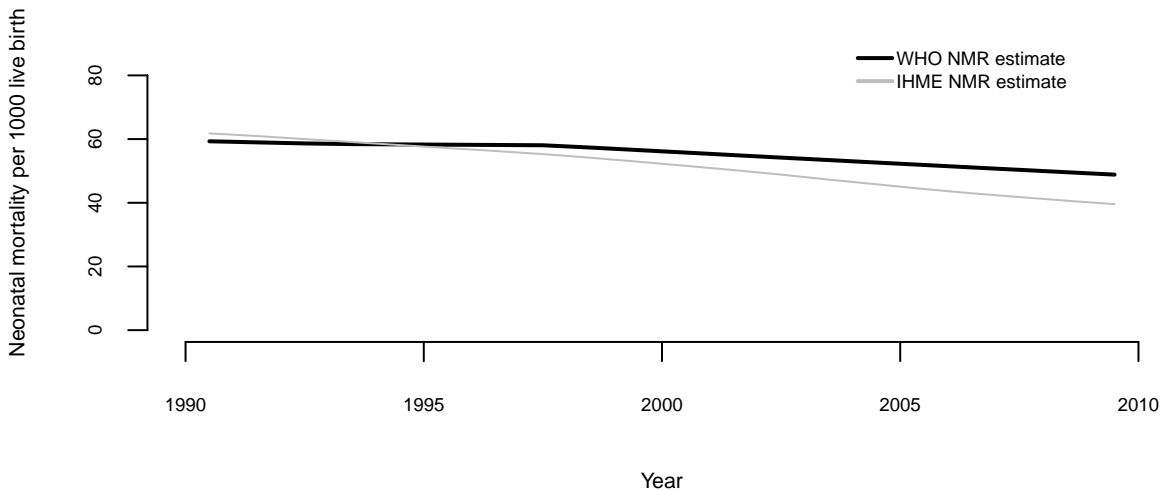

**Sierra Leone**  
**Percentage difference between WHO and IHME NMR estimates**

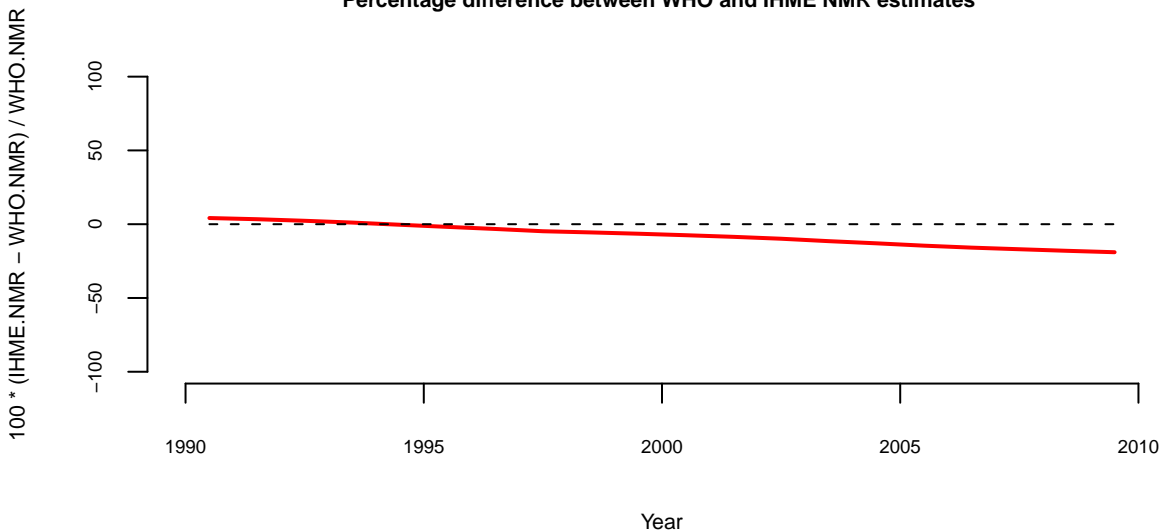

**Singapore**  
**Paired t-test: p-value = 8e-07**

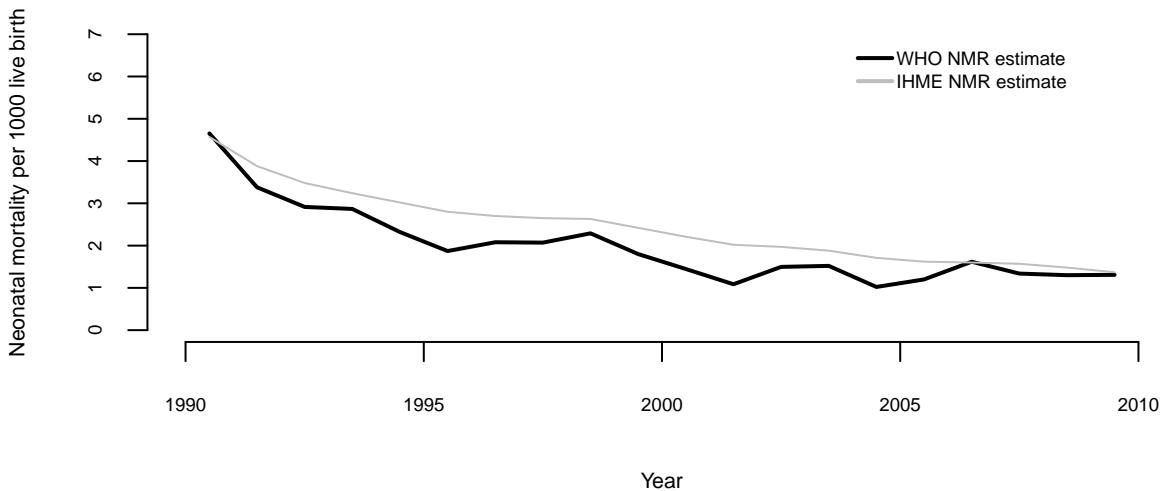

**Singapore**  
**Percentage difference between WHO and IHME NMR estimates**

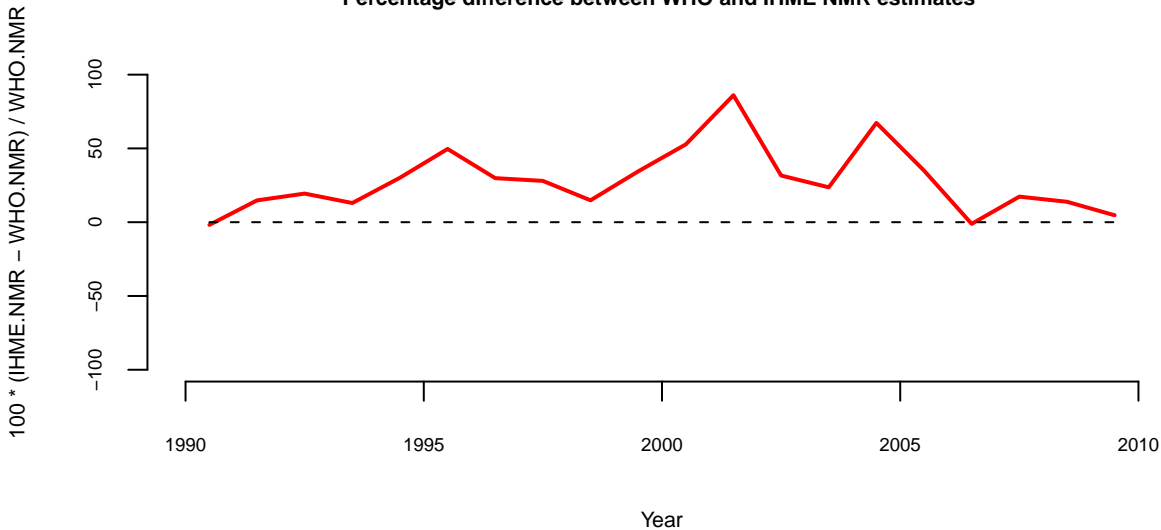

**Slovakia**  
**Paired t-test: p-value = 0.5**

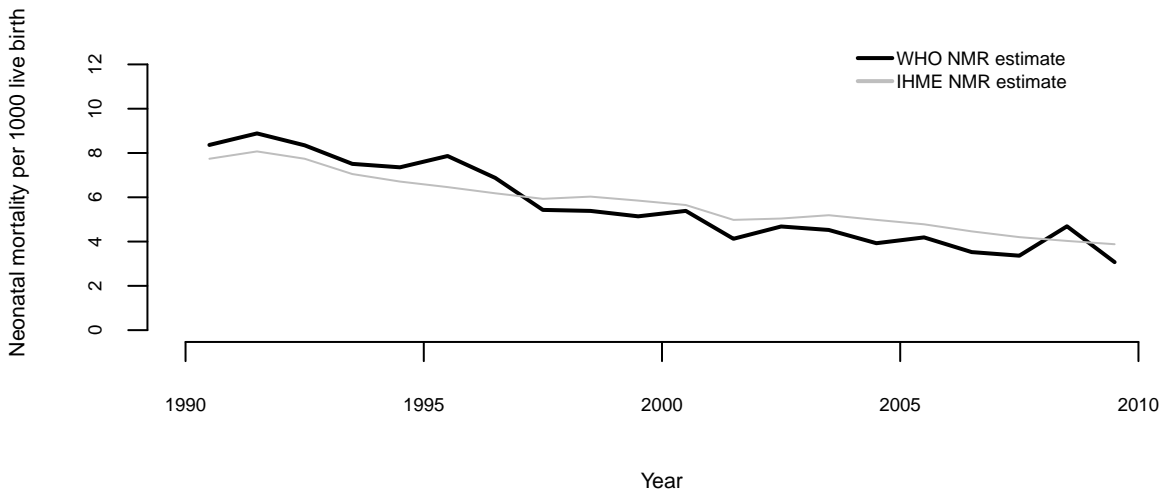

**Slovakia**  
**Percentage difference between WHO and IHME NMR estimates**

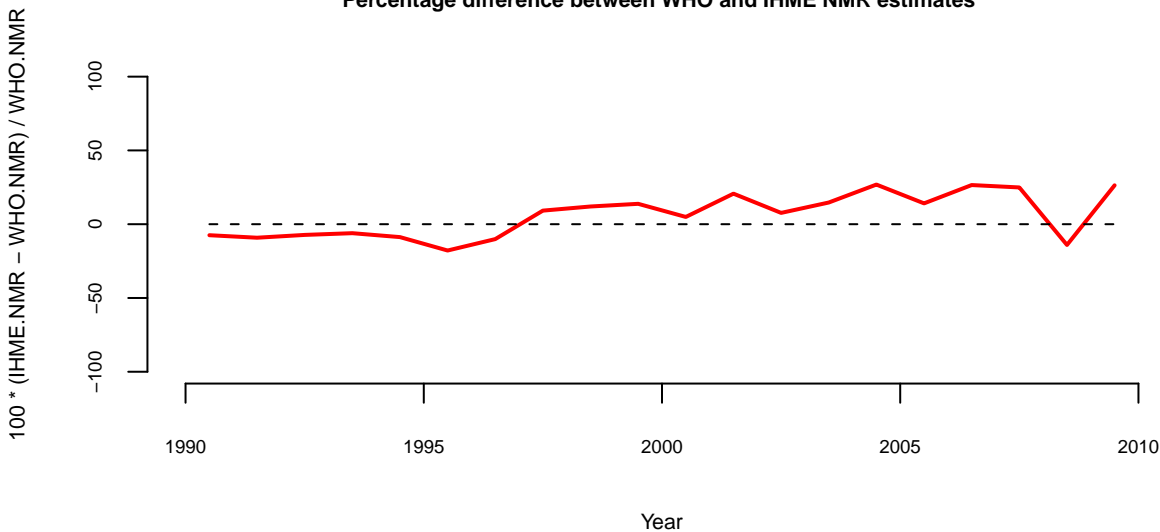

**Slovenia**  
**Paired t-test: p-value = 0.0012**

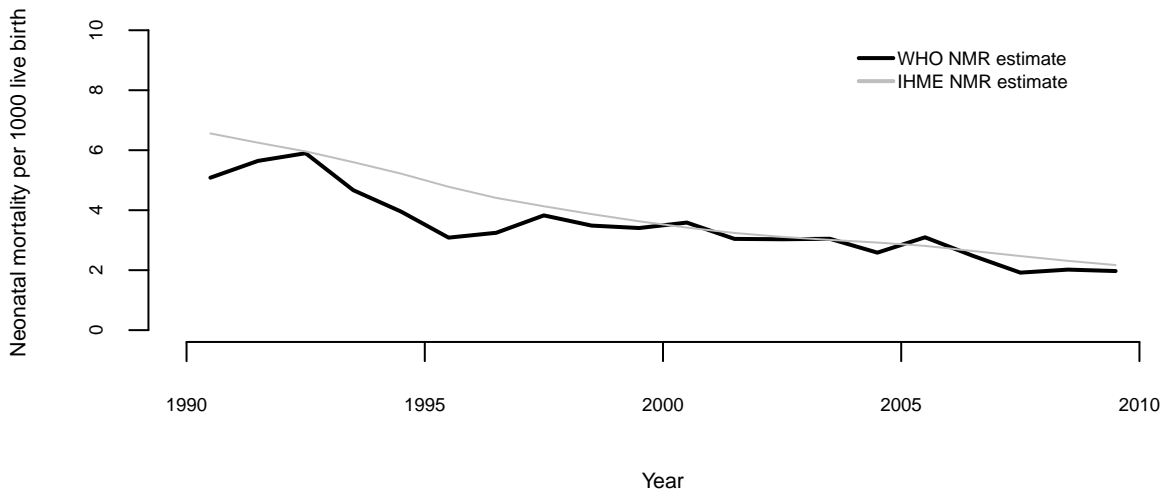

**Slovenia**  
**Percentage difference between WHO and IHME NMR estimates**

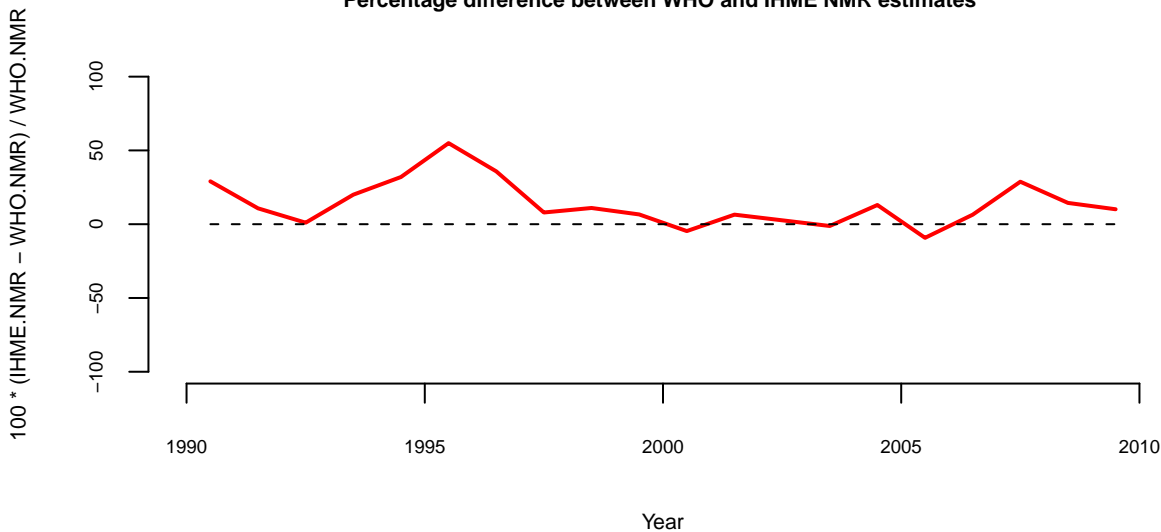

**Somalia**  
**Paired t-test: p-value = 2.3e-12**

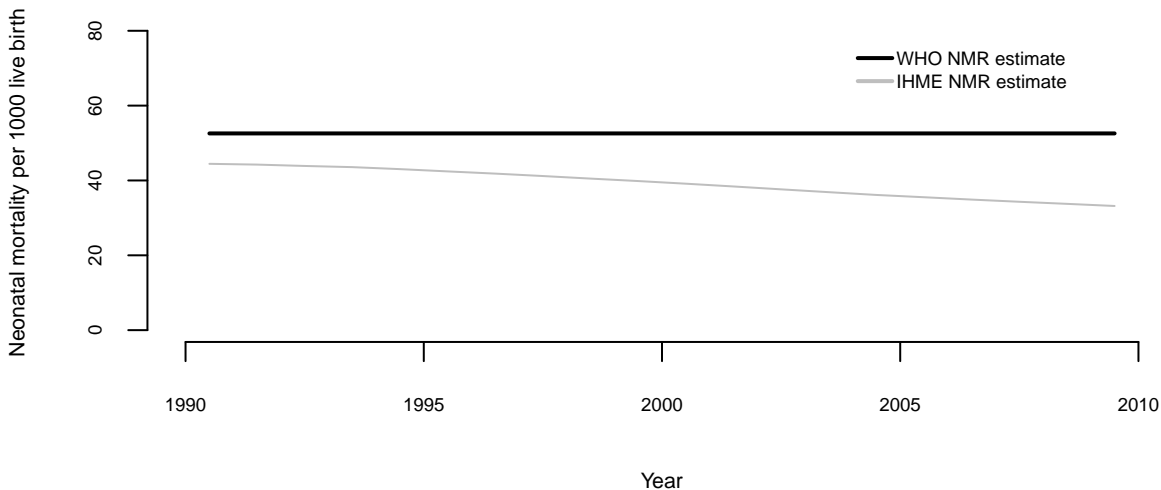

**Somalia**  
**Percentage difference between WHO and IHME NMR estimates**

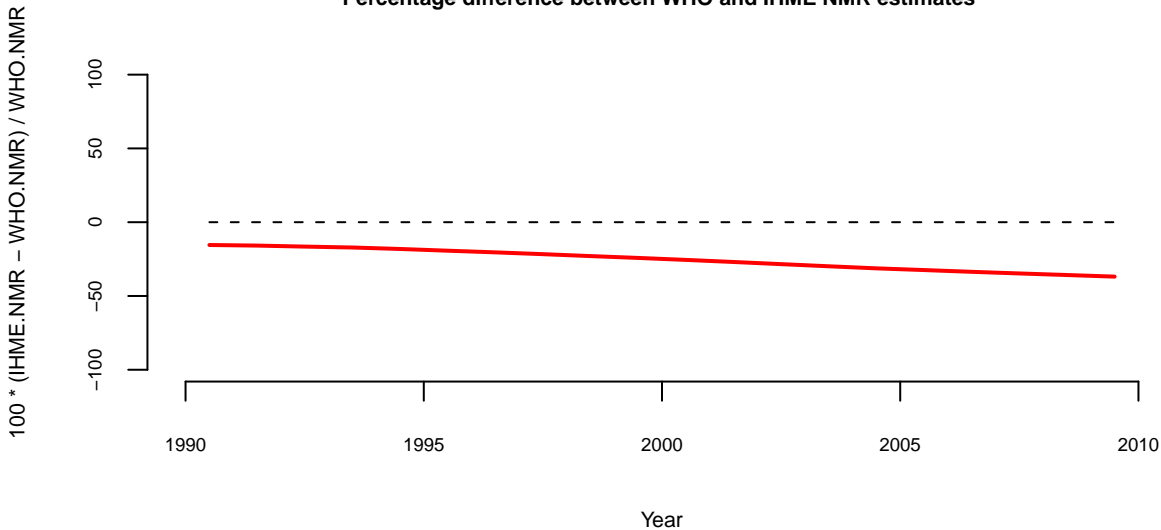

**South Africa**  
**Paired t-test: p-value = 1.3e-06**

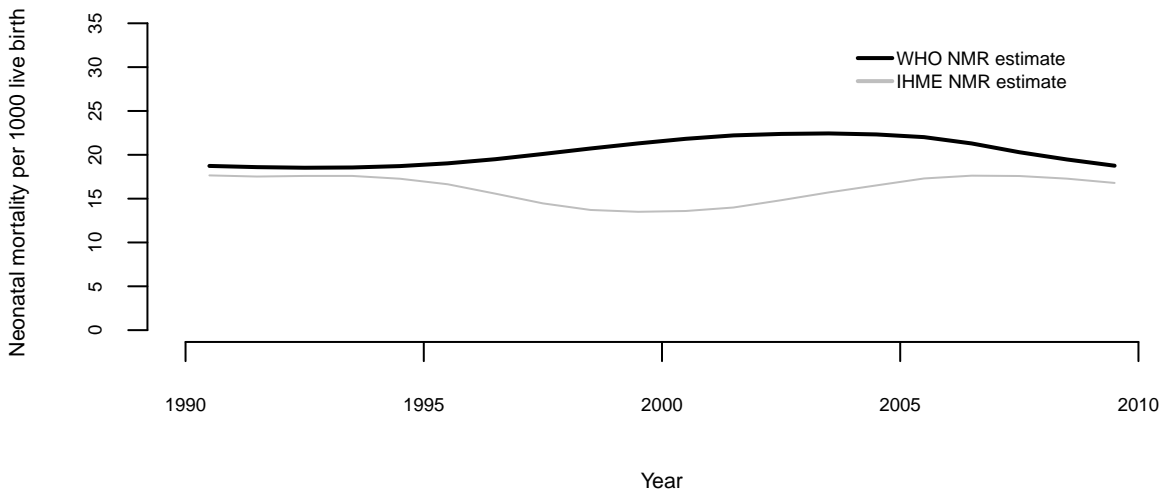

**South Africa**  
**Percentage difference between WHO and IHME NMR estimates**

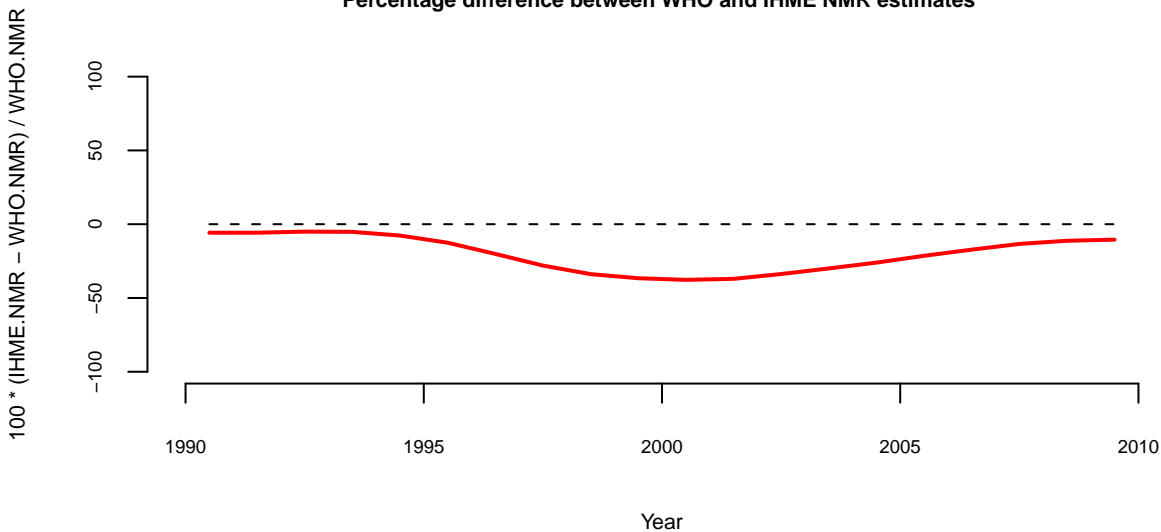

Spain  
Paired t-test: p-value = 6e-13

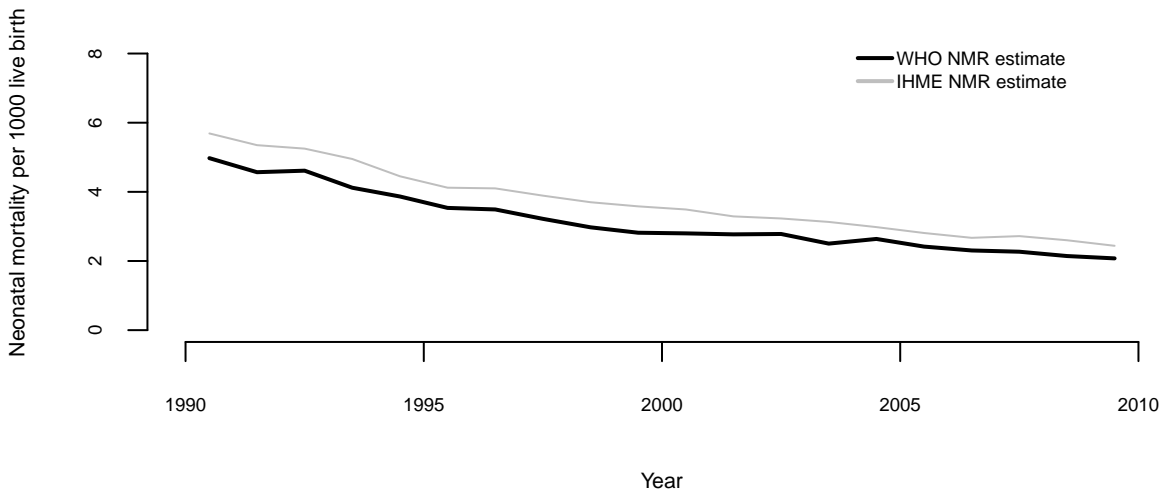

Spain  
Percentage difference between WHO and IHME NMR estimates

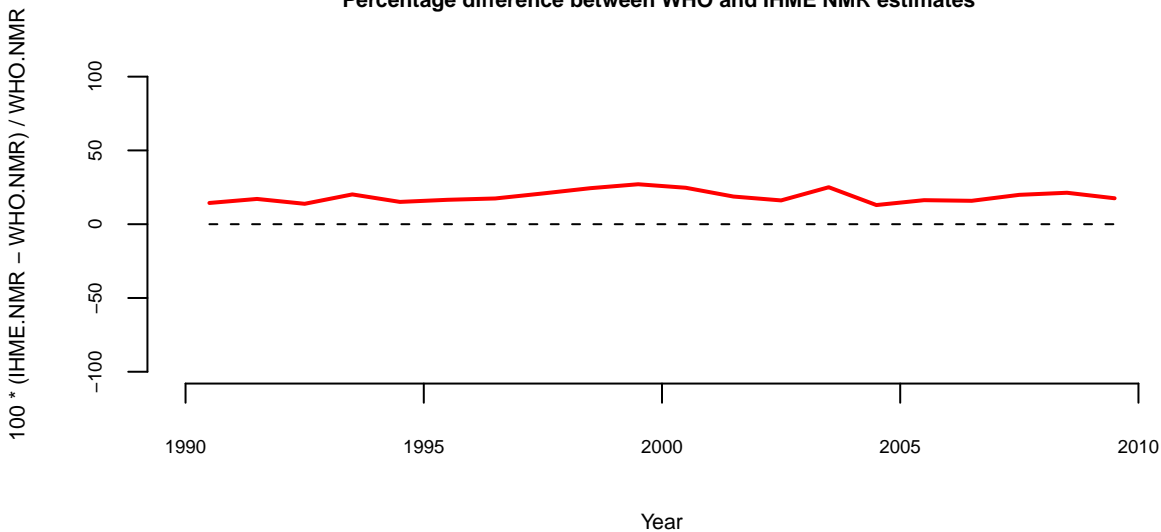

**Sri Lanka**  
**Paired t-test: p-value = 0.91**

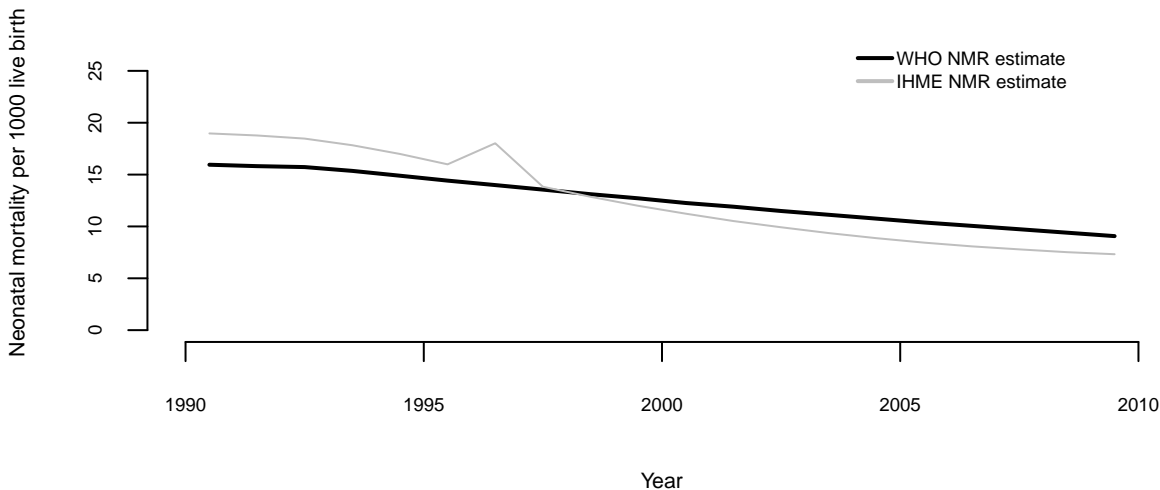

**Sri Lanka**  
**Percentage difference between WHO and IHME NMR estimates**

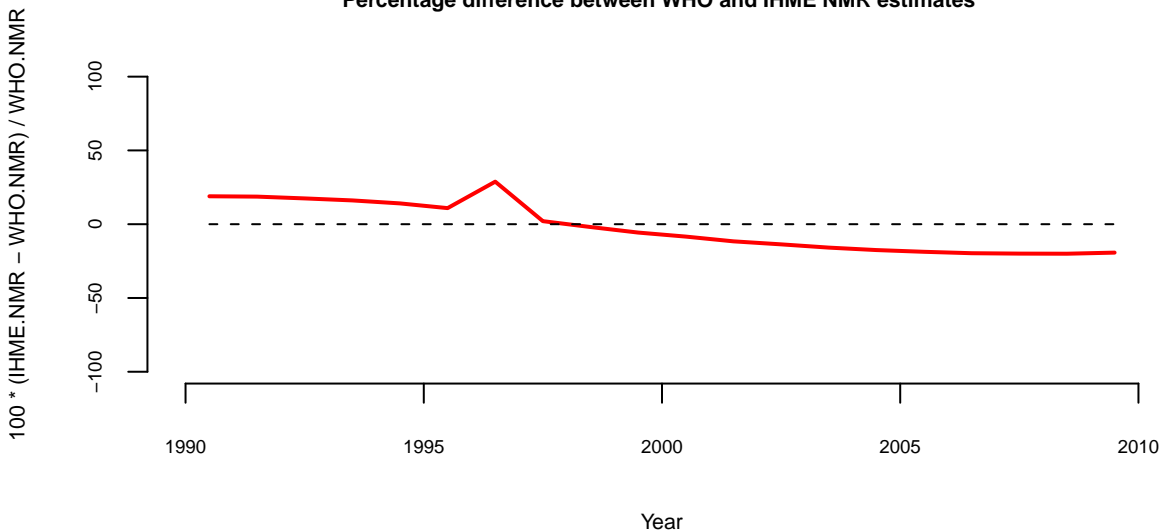

**Sudan**  
**Paired t-test: p-value = 7.3e-18**

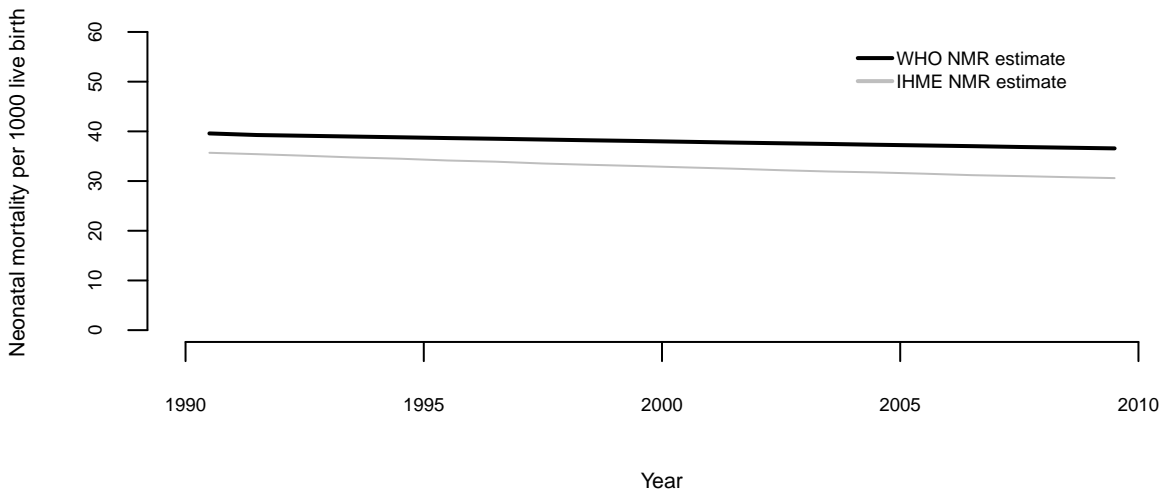

**Sudan**  
**Percentage difference between WHO and IHME NMR estimates**

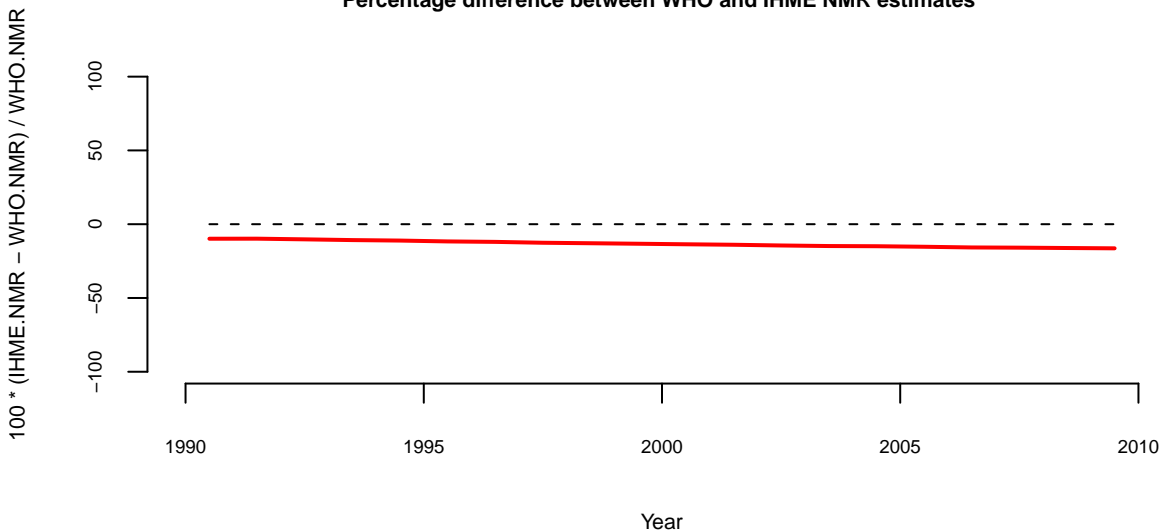

Suriname  
Paired t-test: p-value = 1.5e-15

Neonatal mortality per 1000 live birth

WHO NMR estimate  
IHME NMR estimate

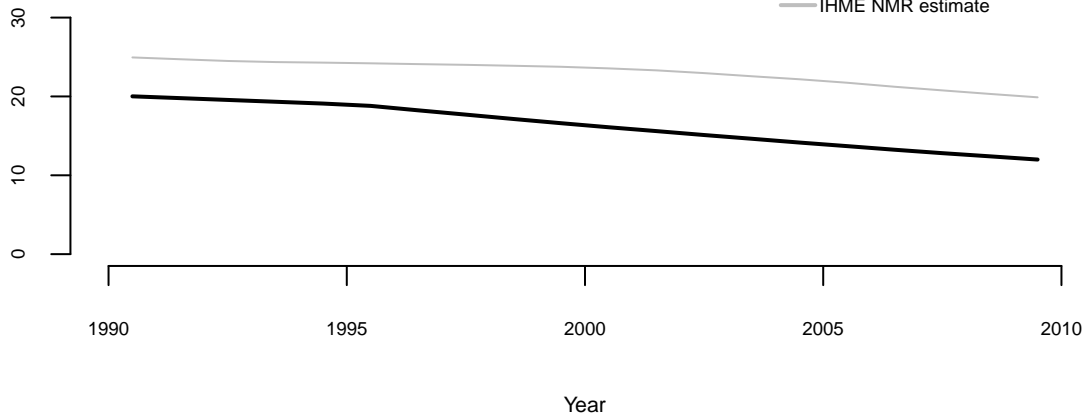

Suriname  
Percentage difference between WHO and IHME NMR estimates

100 \* (IHME.NMR - WHO.NMR) / WHO.NMR

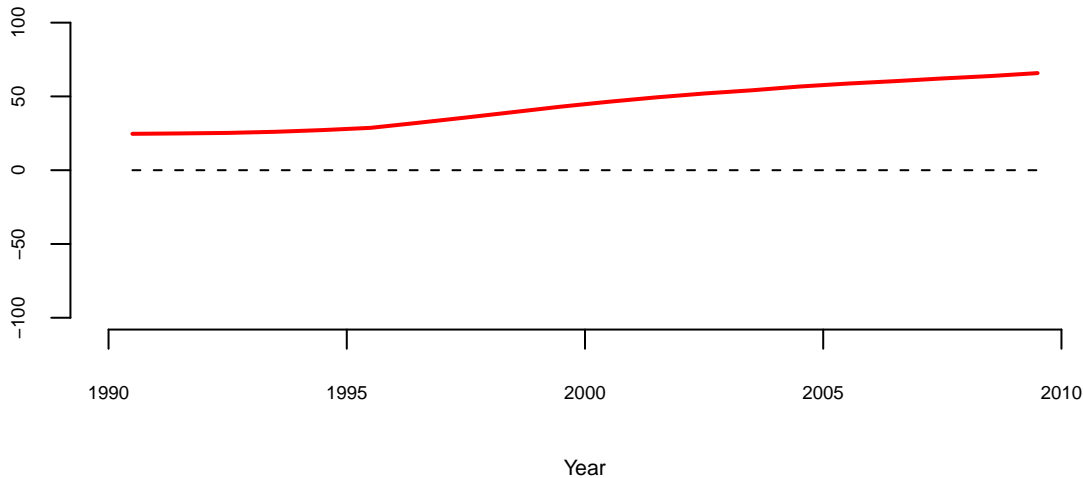

**Swaziland**  
**Paired t-test: p-value = 0.00039**

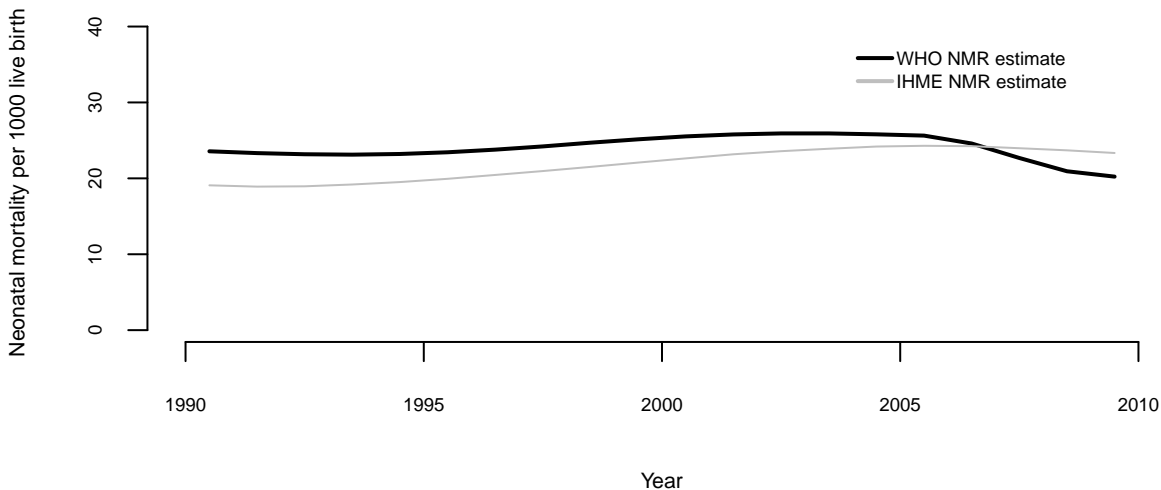

**Swaziland**  
**Percentage difference between WHO and IHME NMR estimates**

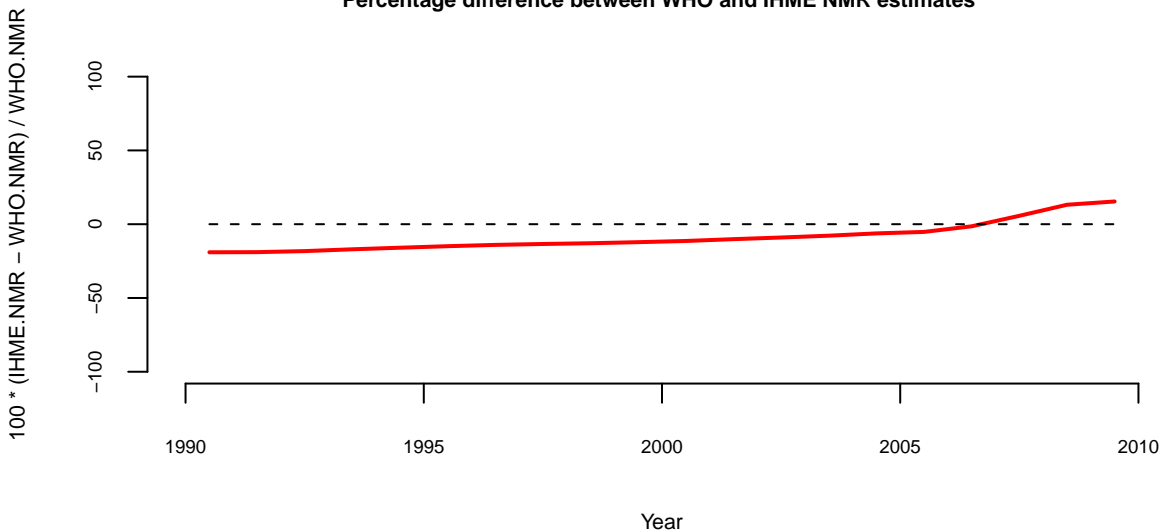

**Sweden**  
Paired t-test: p-value = 0.00011

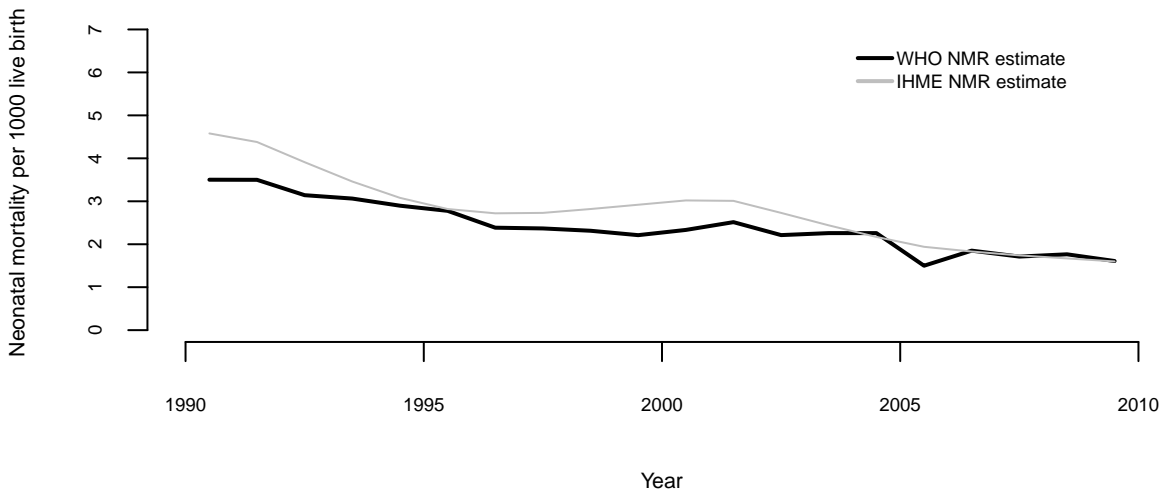

**Sweden**  
Percentage difference between WHO and IHME NMR estimates

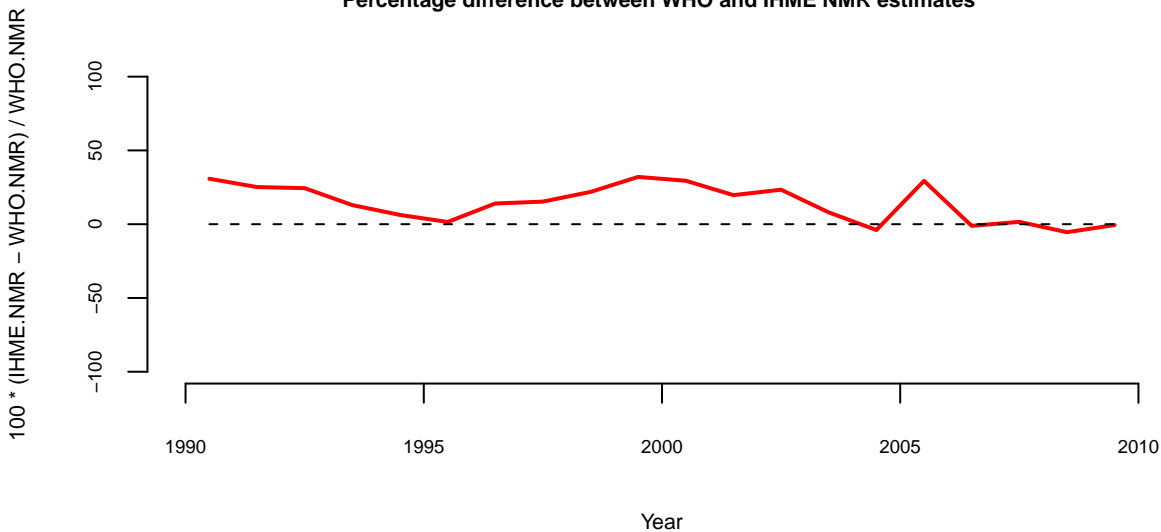

**Switzerland**  
**Paired t-test: p-value = 0.03**

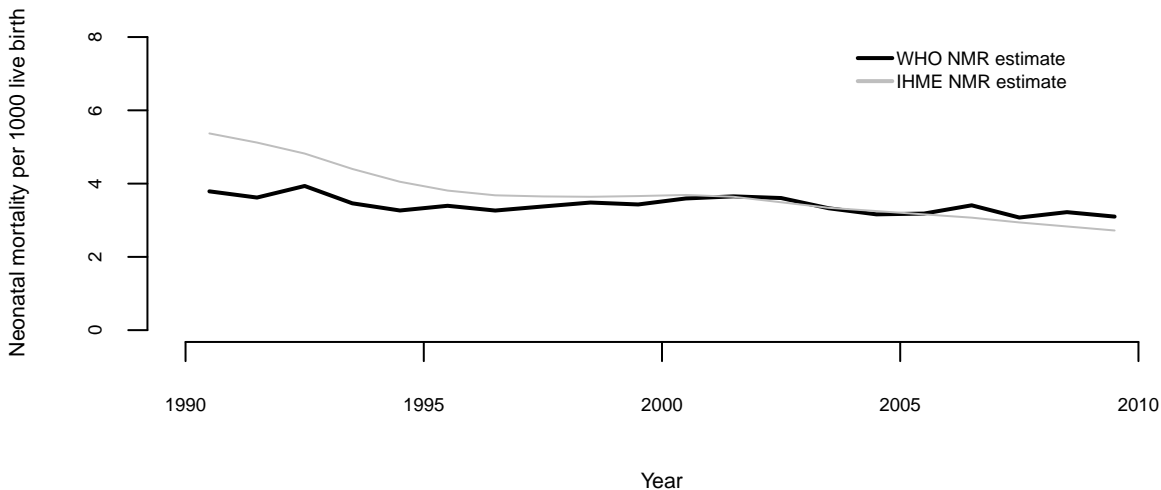

**Switzerland**  
**Percentage difference between WHO and IHME NMR estimates**

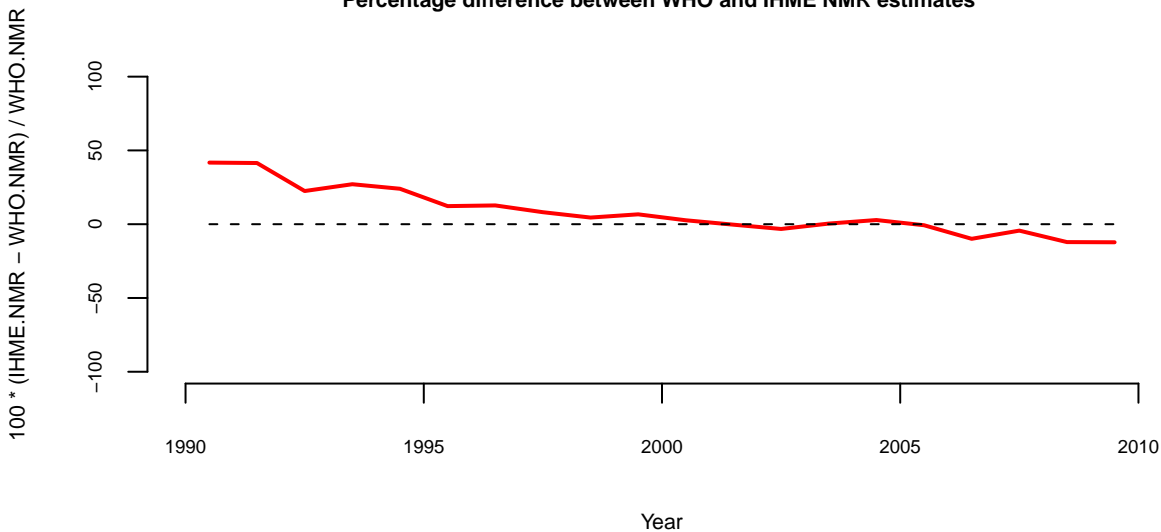

**Syrian Arab Republic**  
**Paired t-test: p-value = 0.00076**

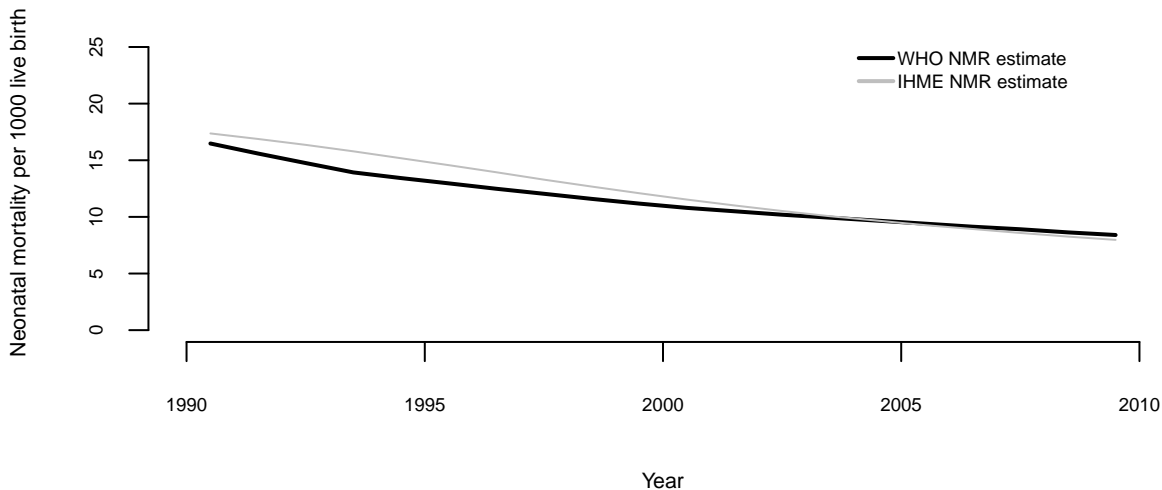

**Syrian Arab Republic**  
**Percentage difference between WHO and IHME NMR estimates**

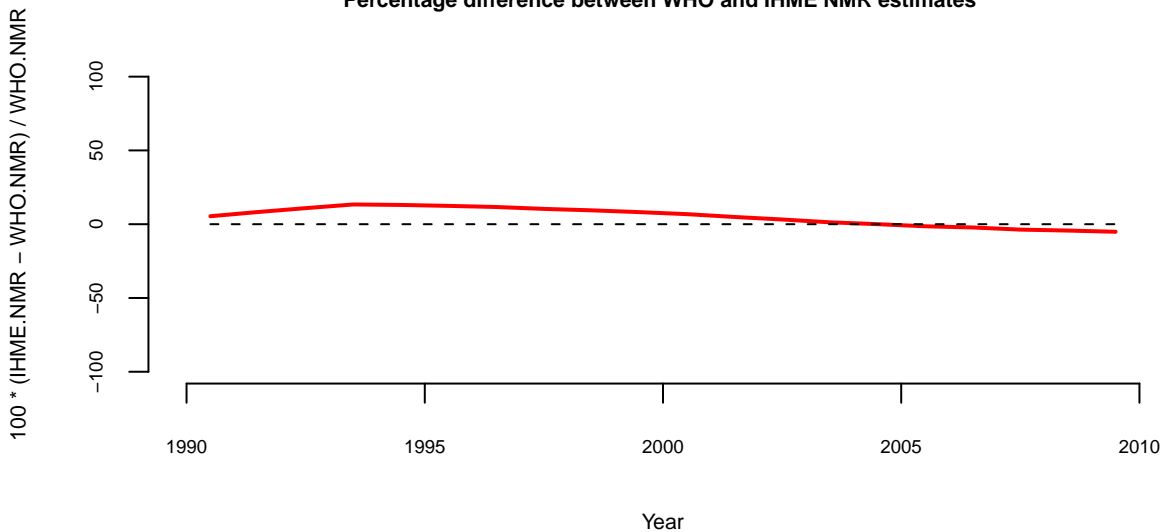

**The former Yugoslav Republic of Macedonia**  
**Paired t-test: p-value = 0.76**

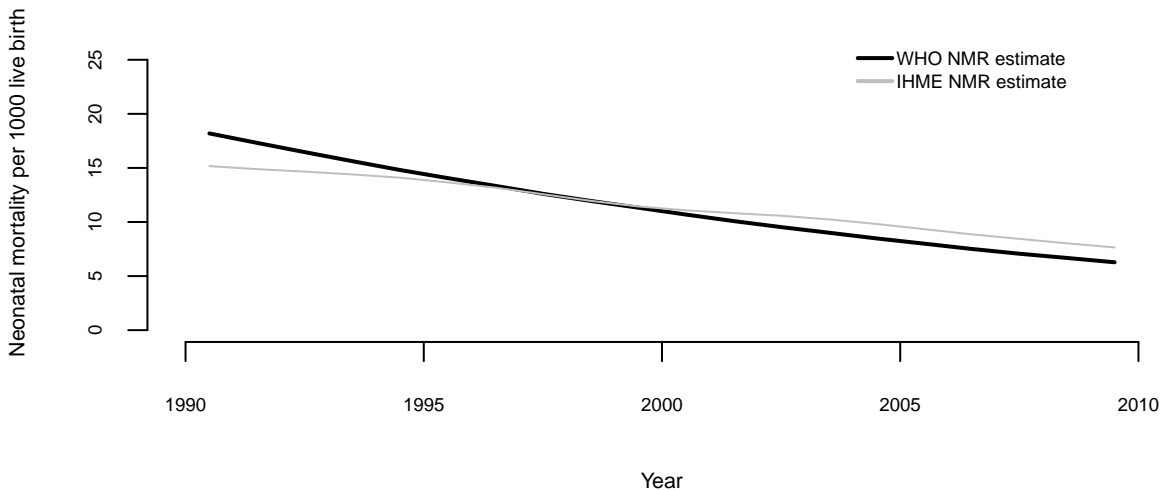

**The former Yugoslav Republic of Macedonia**  
**Percentage difference between WHO and IHME NMR estimates**

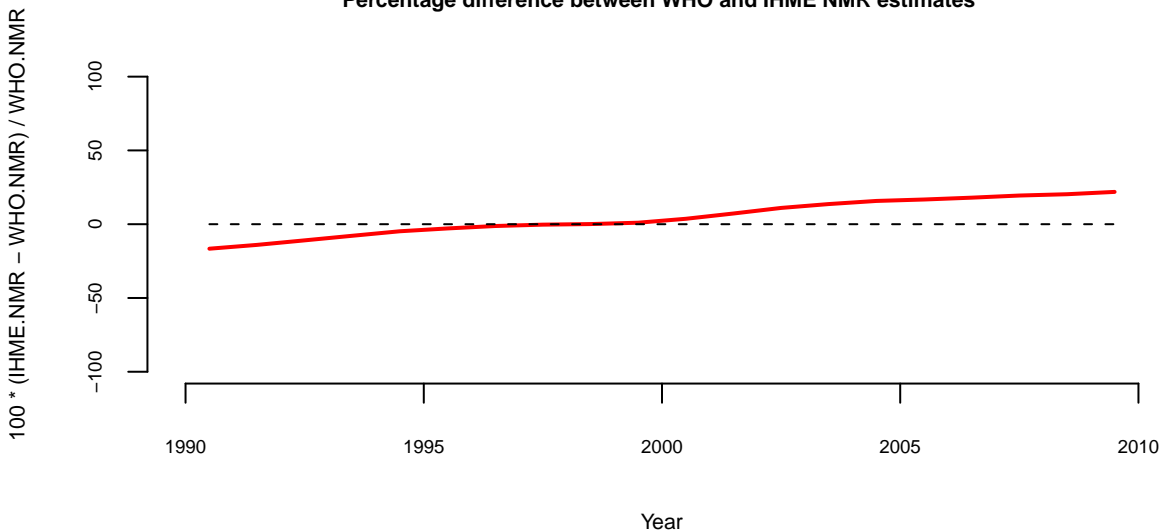

**Timor-Leste**  
**Paired t-test: p-value = 4.7e-06**

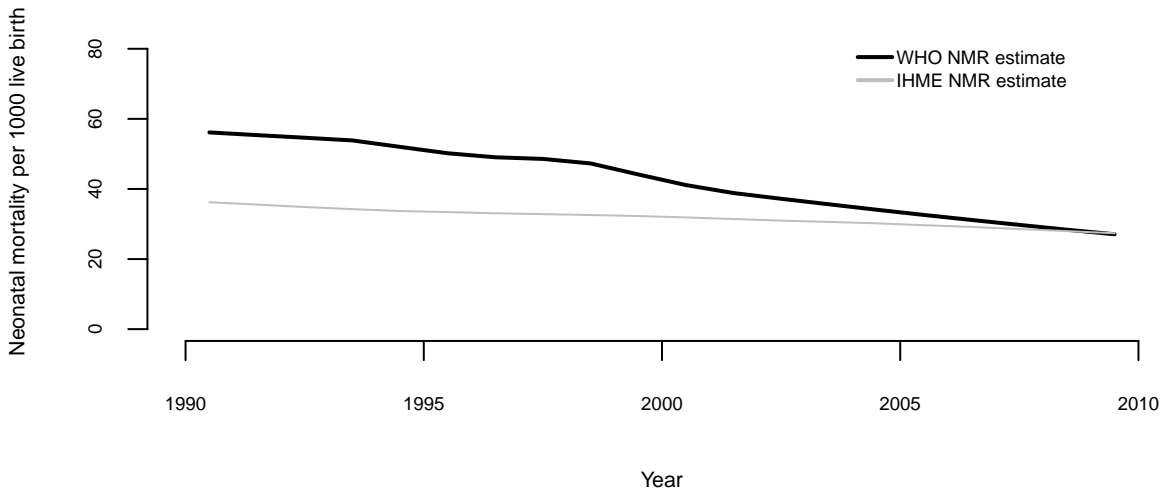

**Timor-Leste**  
**Percentage difference between WHO and IHME NMR estimates**

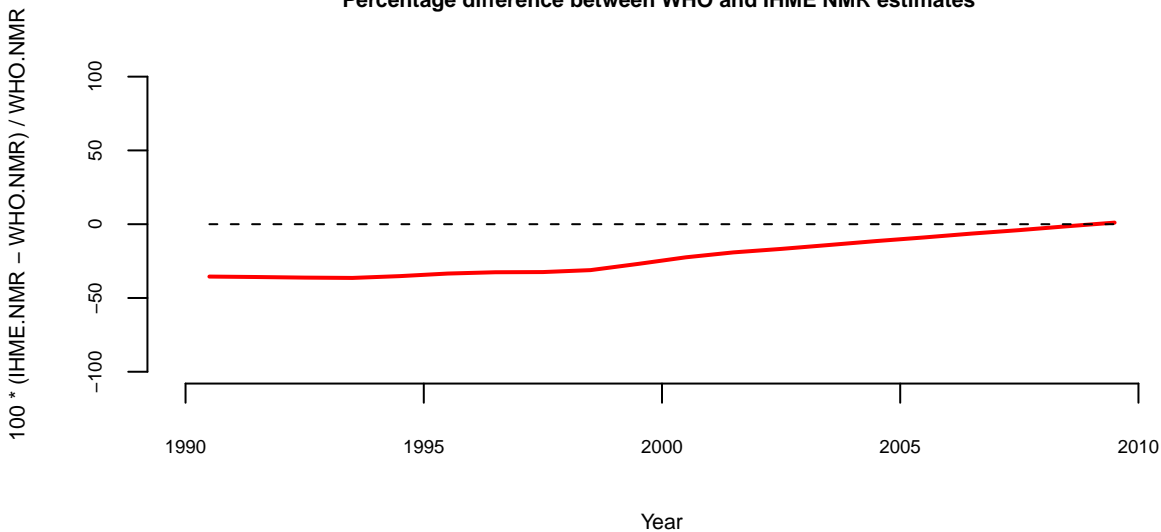

**Togo**  
**Paired t-test: p-value = 7.2e-06**

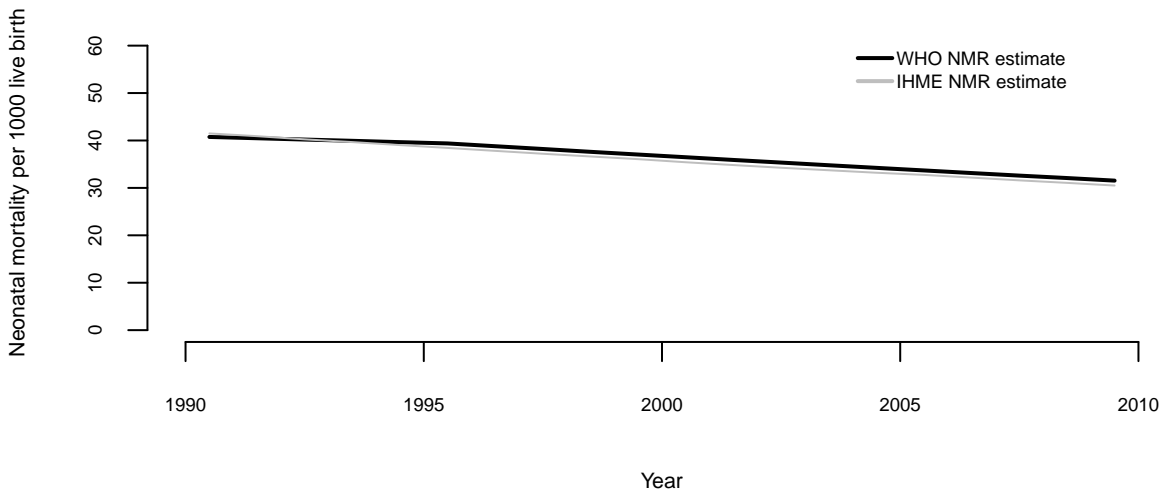

**Togo**  
**Percentage difference between WHO and IHME NMR estimates**

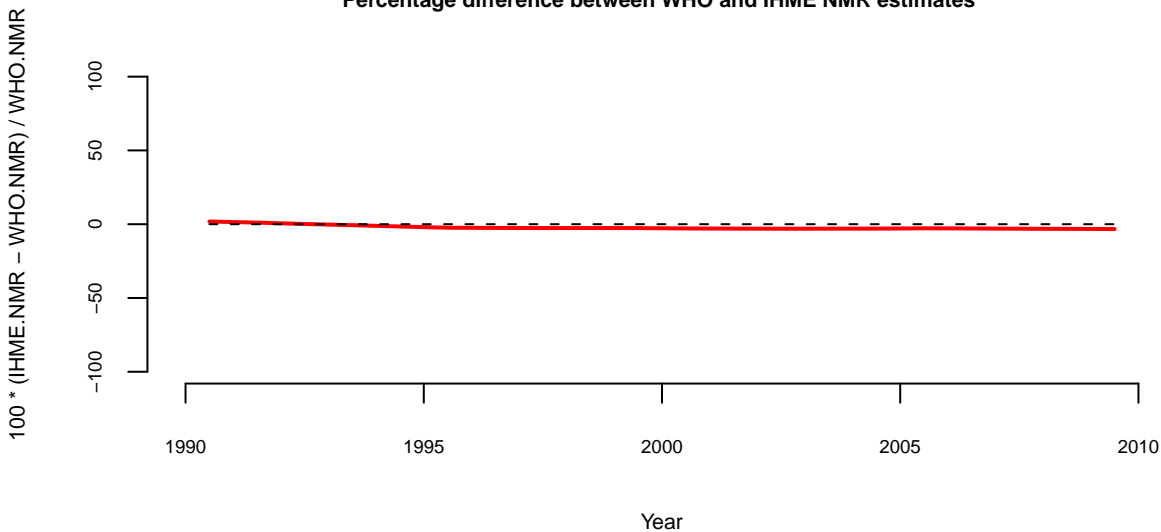

**Trinidad and Tobago**  
**Paired t-test: p-value = 5.2e-09**

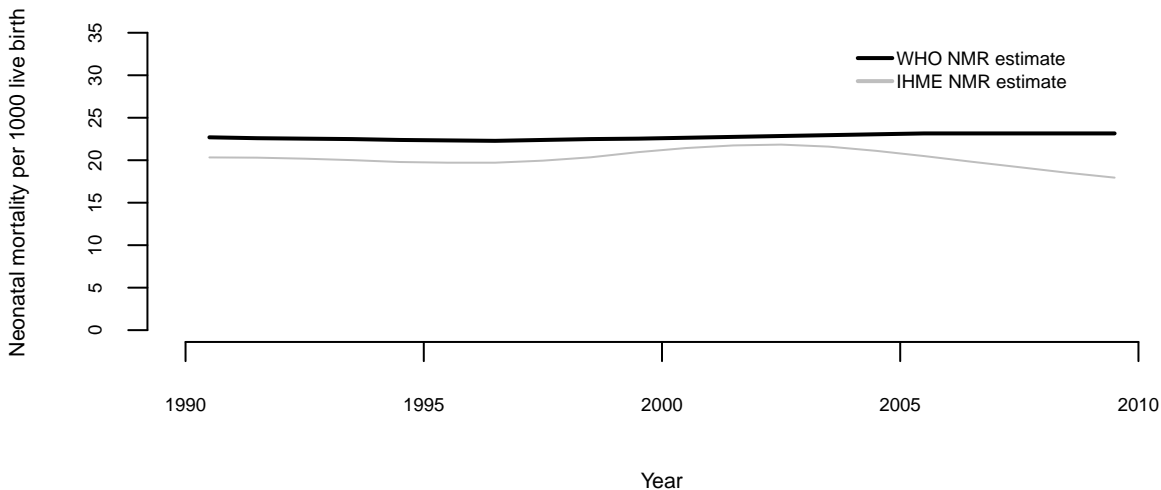

**Trinidad and Tobago**  
**Percentage difference between WHO and IHME NMR estimates**

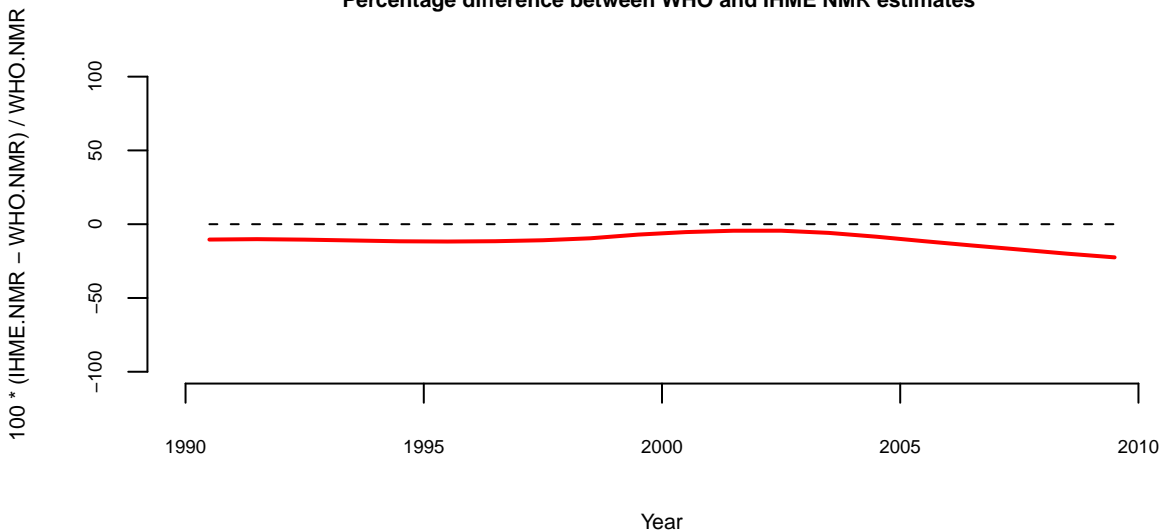

**Tunisia**  
**Paired t-test: p-value = 0.00046**

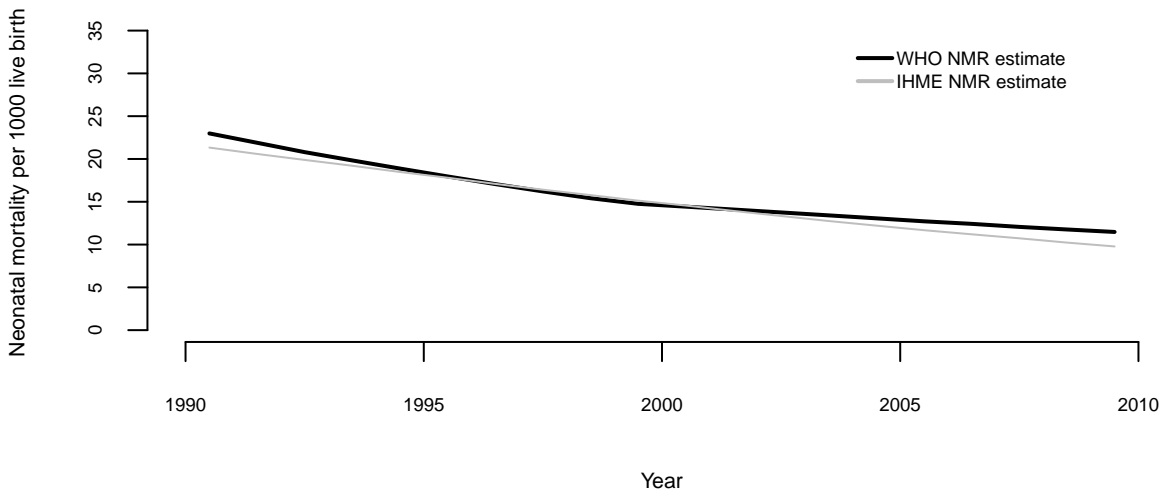

**Tunisia**  
**Percentage difference between WHO and IHME NMR estimates**

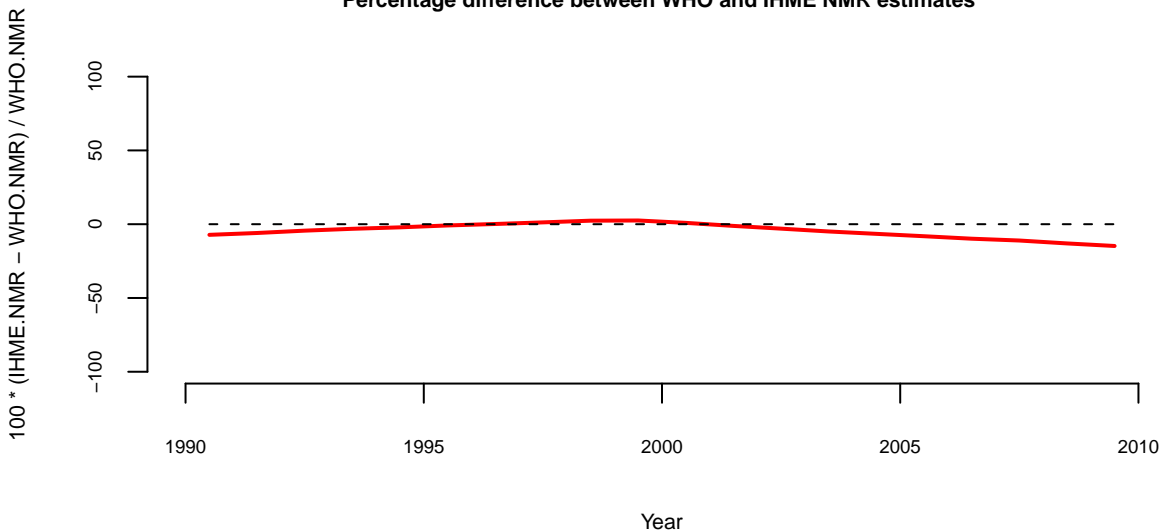

**Turkey**  
**Paired t-test: p-value = 0.96**

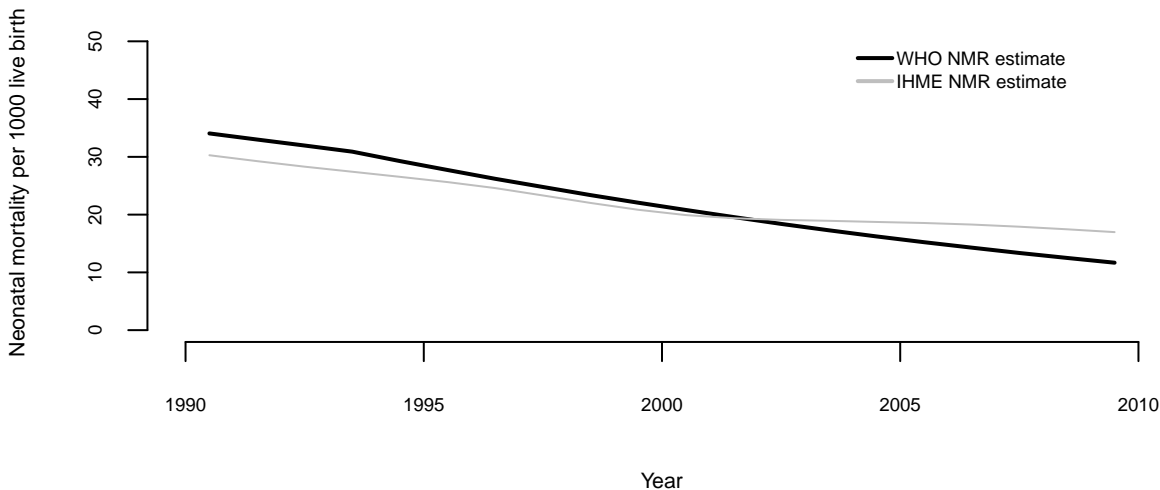

**Turkey**  
**Percentage difference between WHO and IHME NMR estimates**

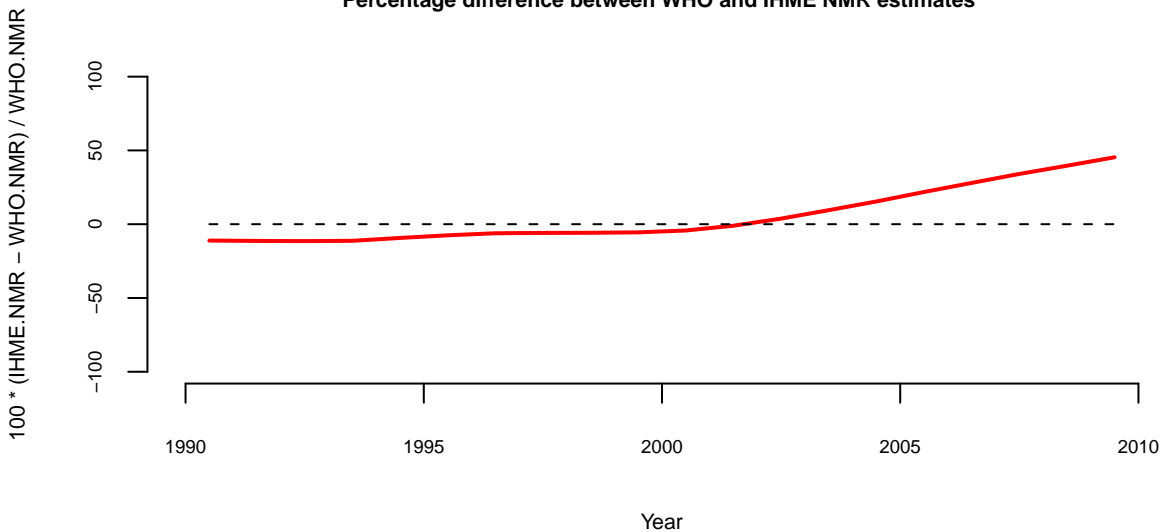

**Turkmenistan**  
**Paired t-test: p-value = 0.83**

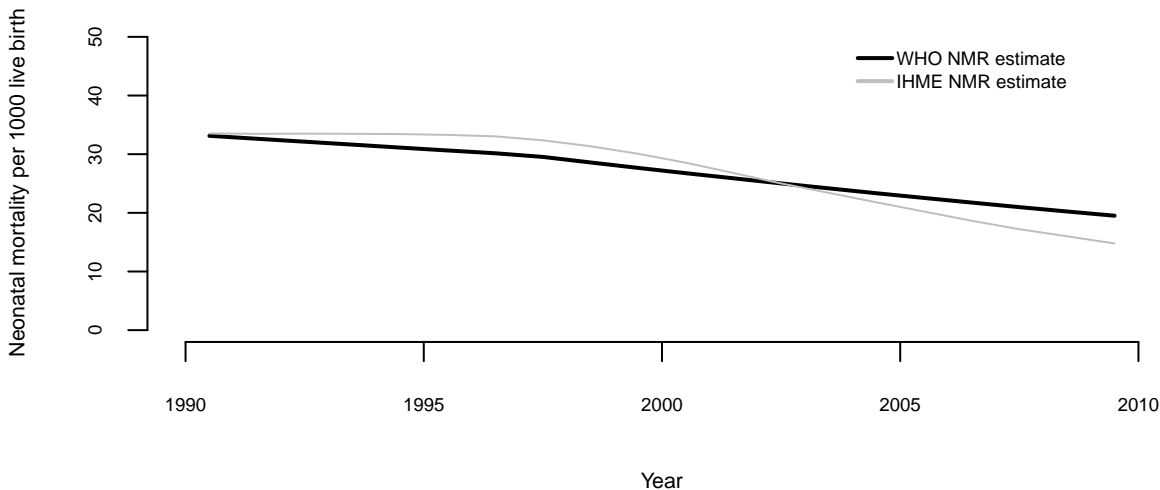

**Turkmenistan**  
**Percentage difference between WHO and IHME NMR estimates**

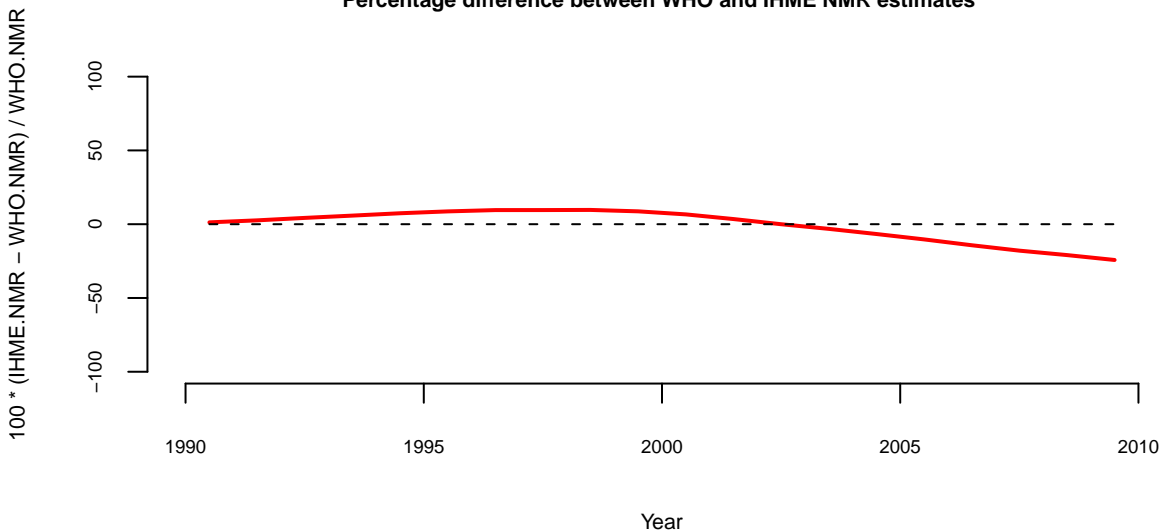

**Uganda**  
**Paired t-test: p-value = 9.6e-11**

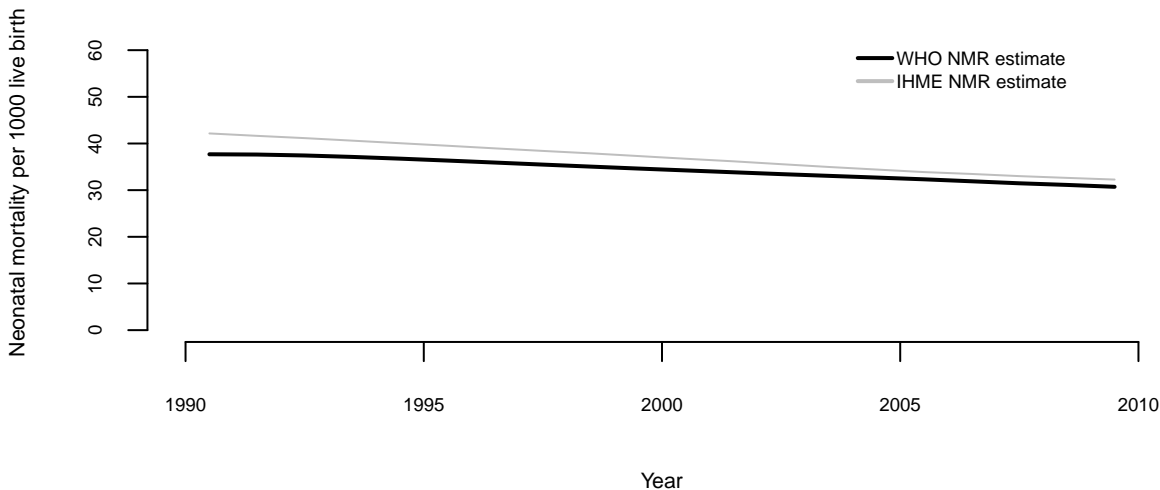

**Uganda**  
**Percentage difference between WHO and IHME NMR estimates**

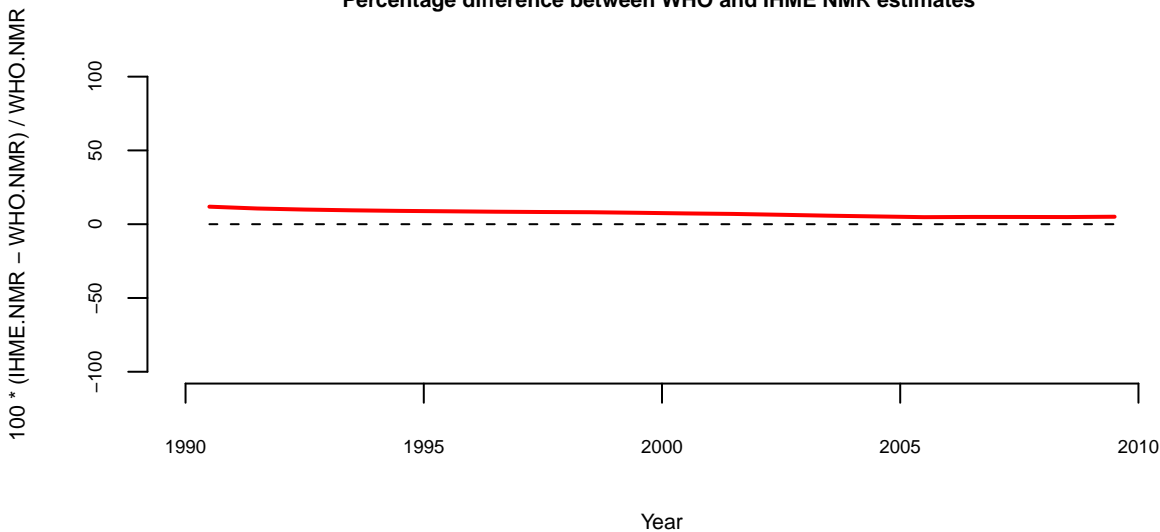

**Ukraine**  
**Paired t-test: p-value = 1.2e-16**

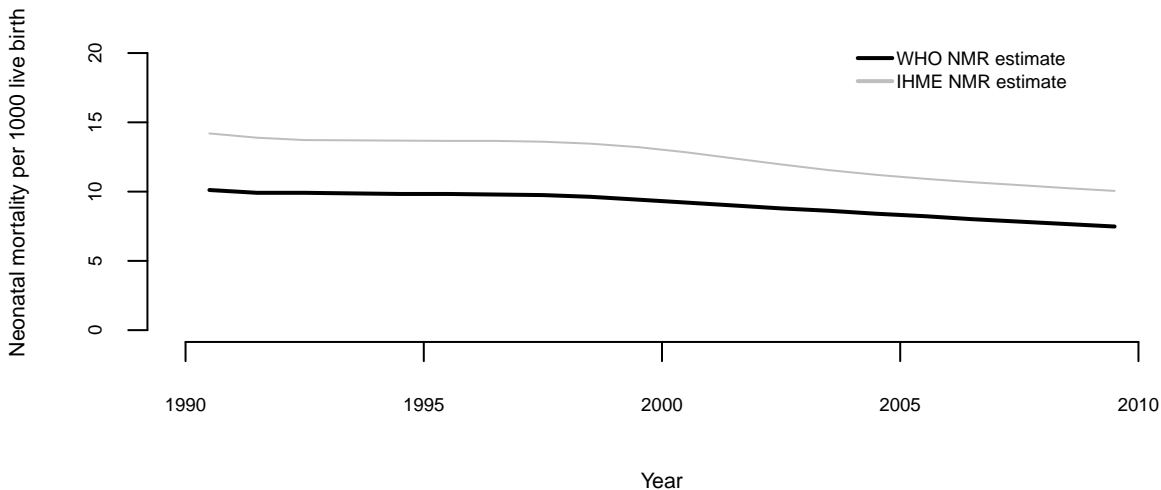

**Ukraine**  
**Percentage difference between WHO and IHME NMR estimates**

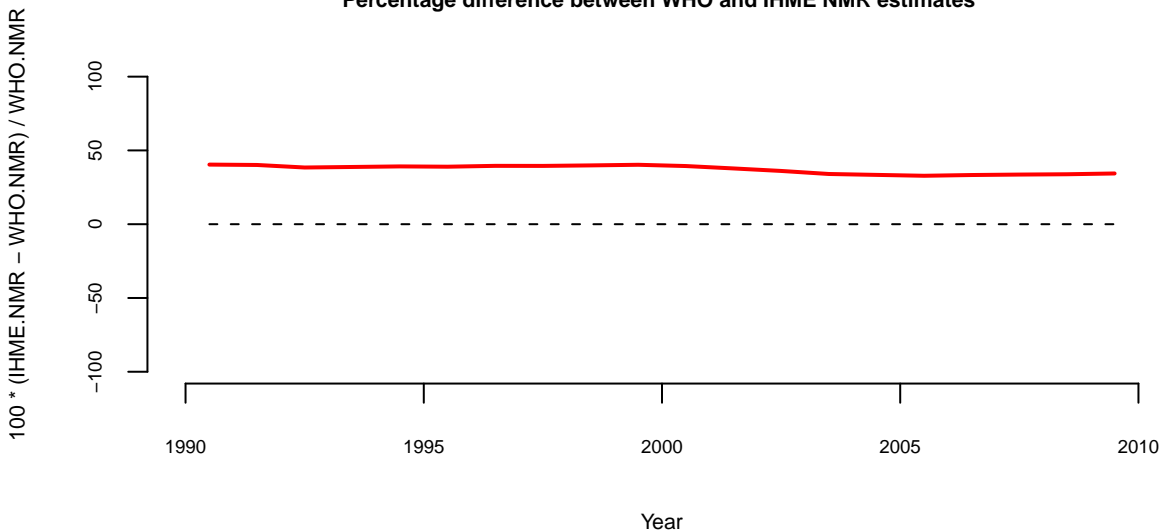

**United Arab Emirates**  
**Paired t-test: p-value = 1.0e-05**

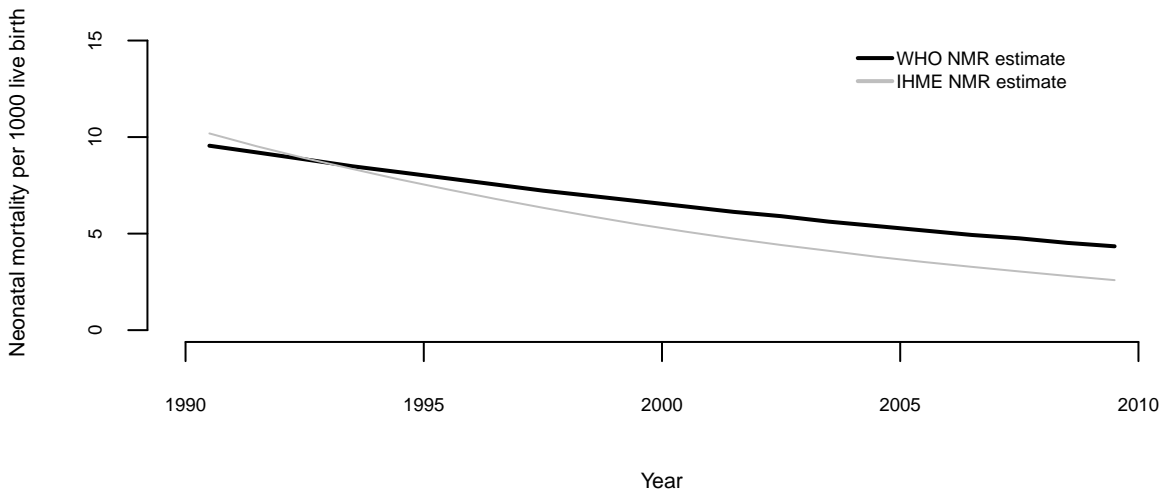

**United Arab Emirates**  
**Percentage difference between WHO and IHME NMR estimates**

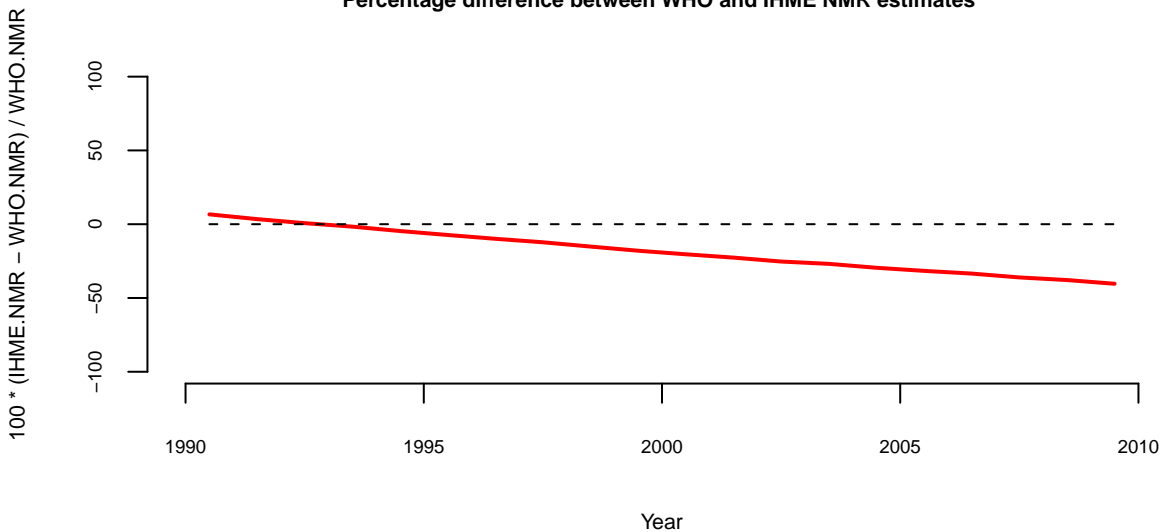

**United Kingdom**  
**Paired t-test: p-value = 0.00031**

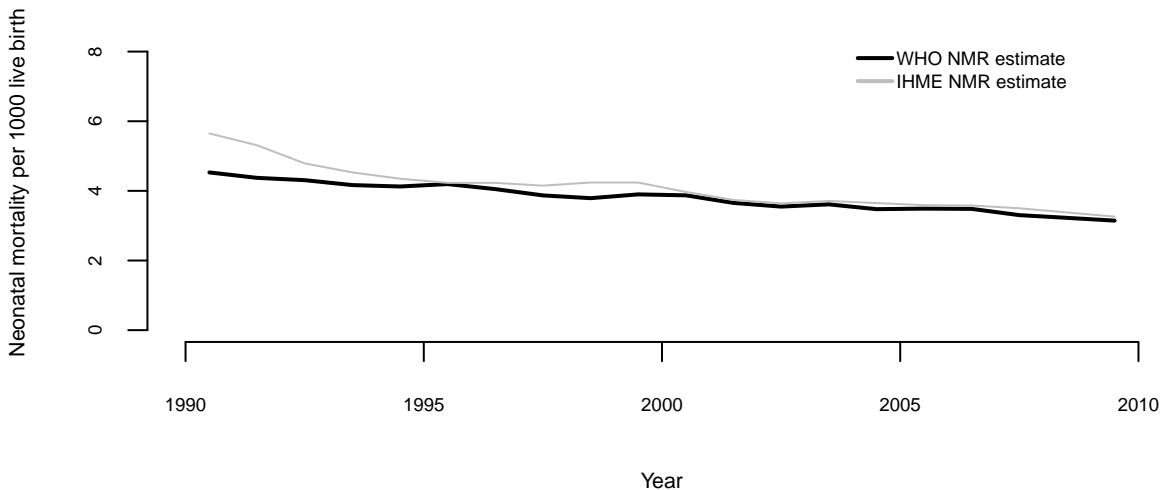

**United Kingdom**  
**Percentage difference between WHO and IHME NMR estimates**

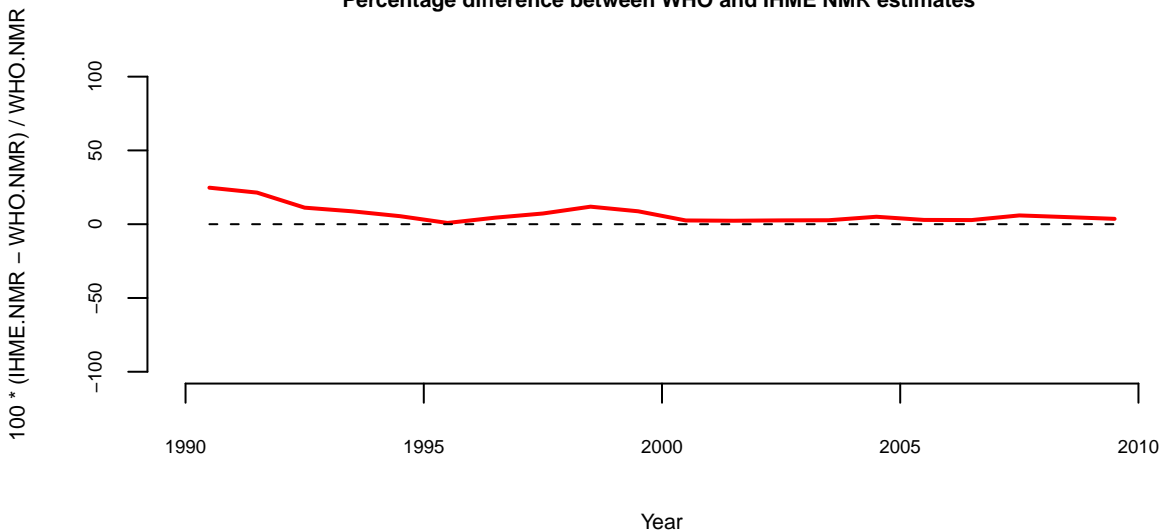

**United Republic of Tanzania**  
**Paired t-test: p-value = 2.2e-13**

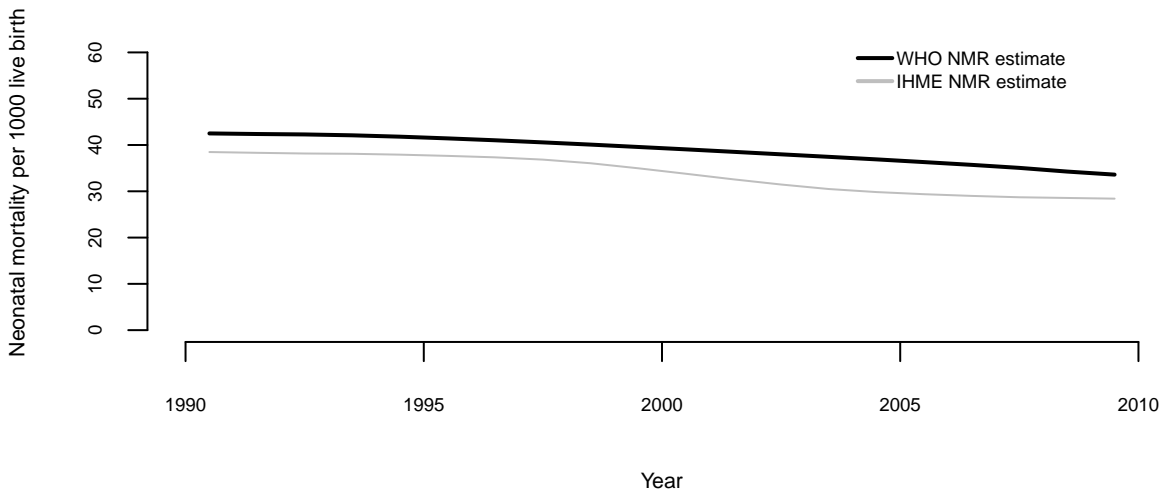

**United Republic of Tanzania**  
**Percentage difference between WHO and IHME NMR estimates**

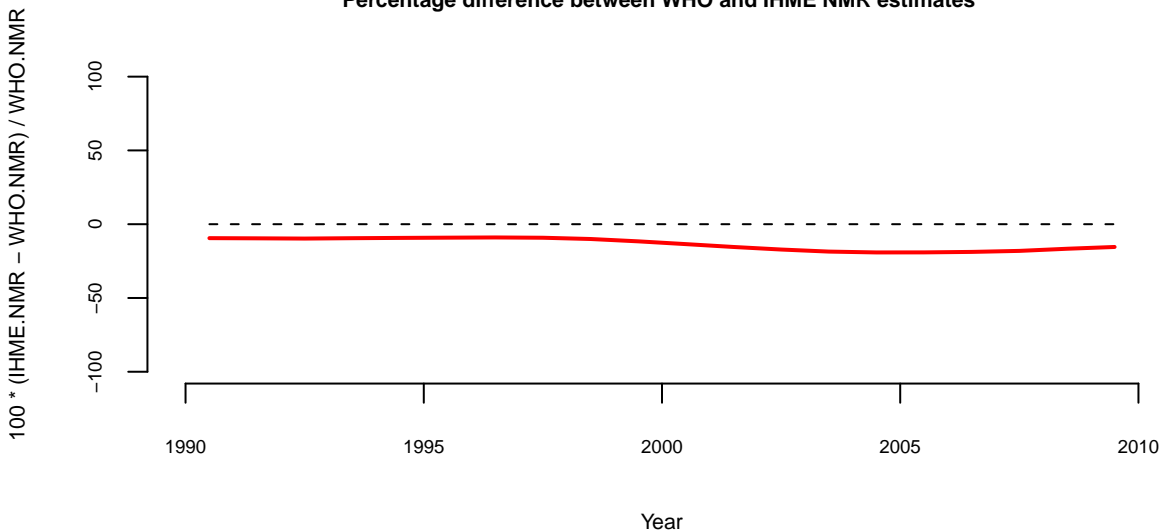

**United States**  
**Paired t-test: p-value = 7e-04**

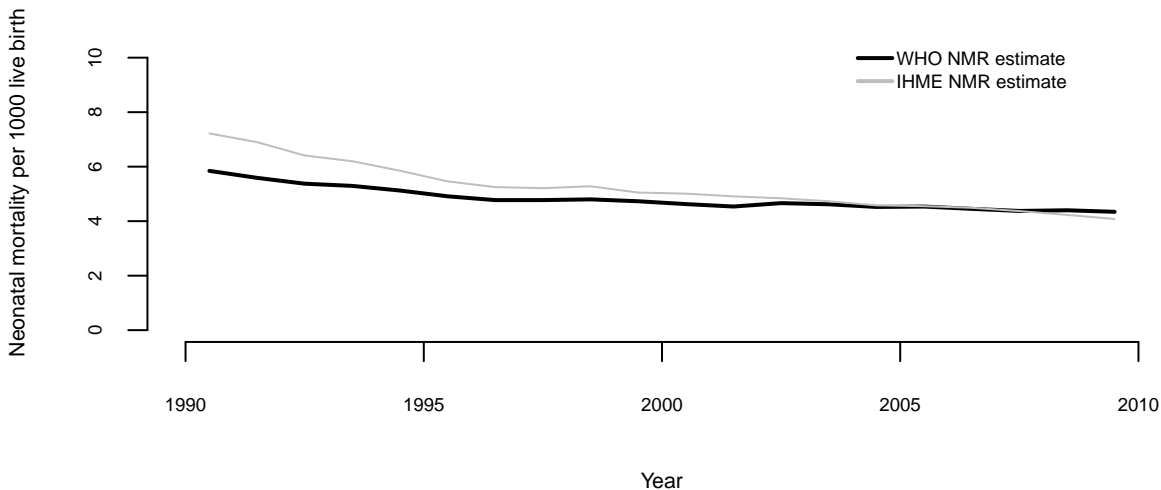

**United States**  
**Percentage difference between WHO and IHME NMR estimates**

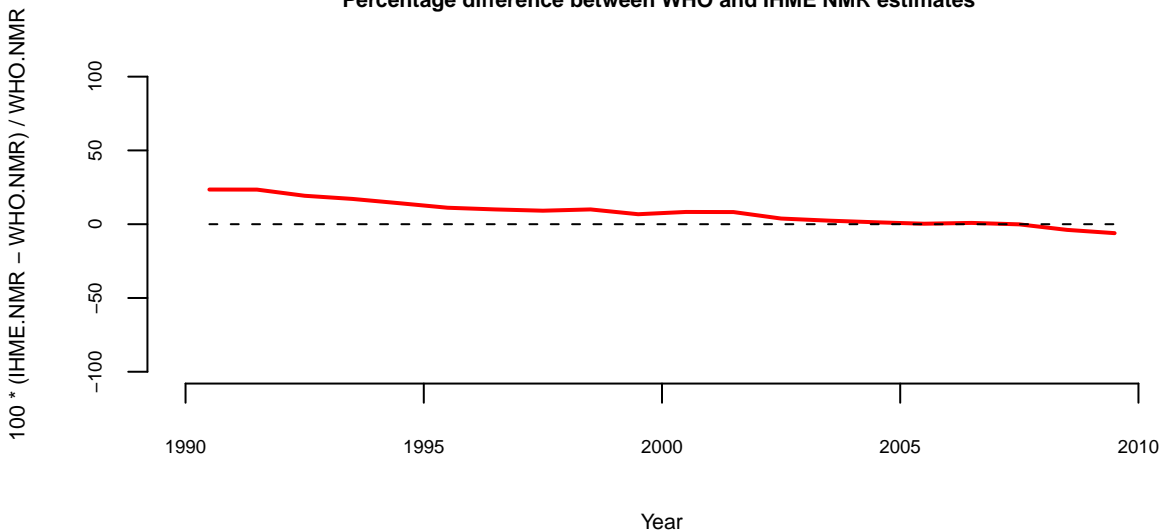

**Uruguay**  
**Paired t-test: p-value = 0.026**

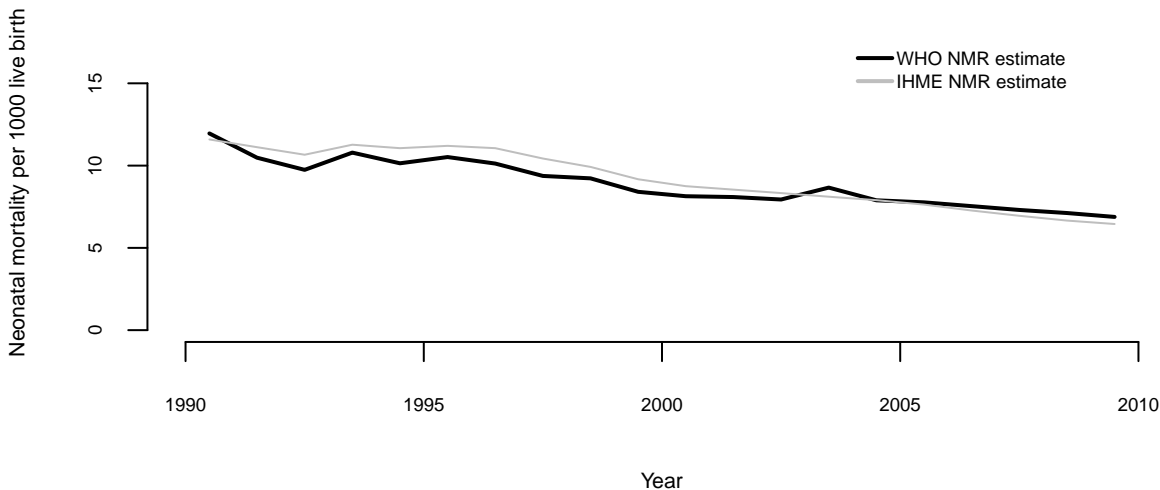

**Uruguay**  
**Percentage difference between WHO and IHME NMR estimates**

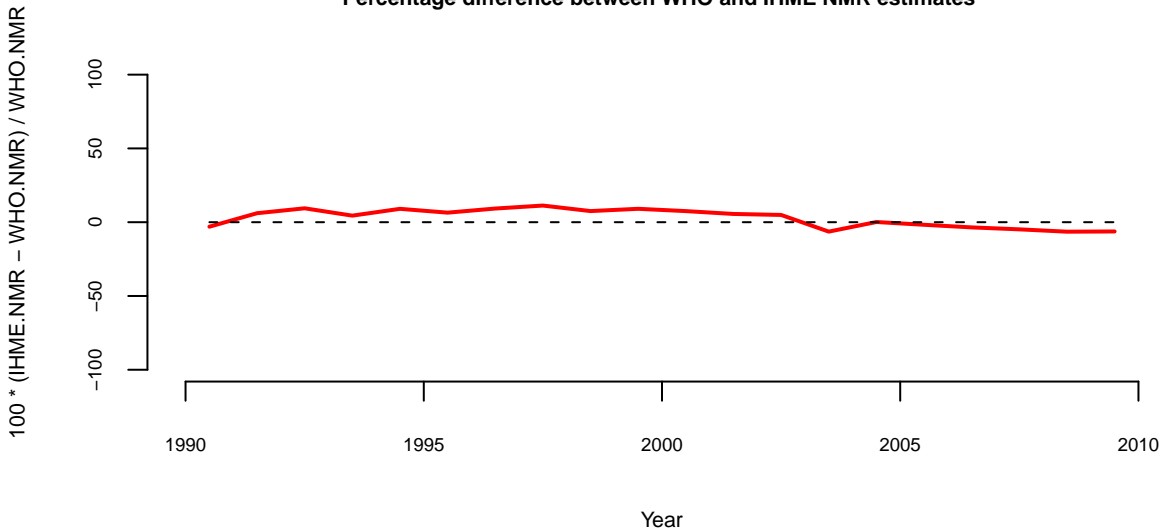

**Uzbekistan**  
**Paired t-test: p-value = 1.3e-06**

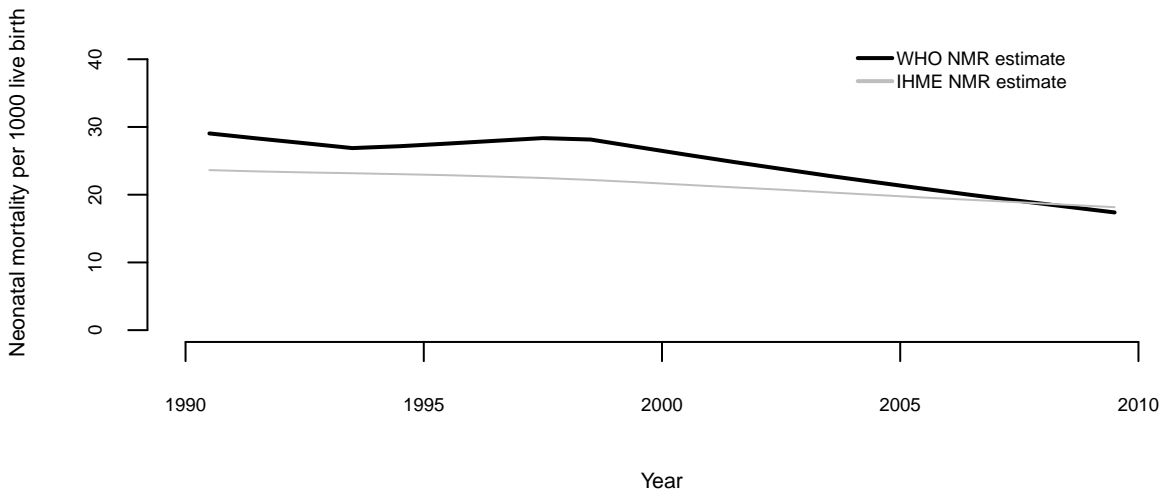

**Uzbekistan**  
**Percentage difference between WHO and IHME NMR estimates**

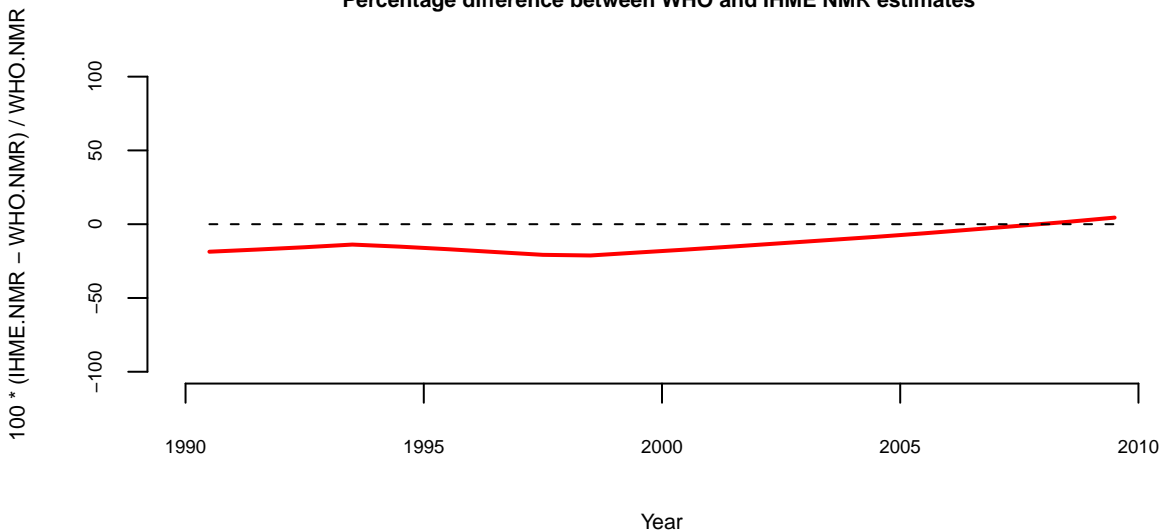

**Venezuela**  
**Paired t-test: p-value = 0.44**

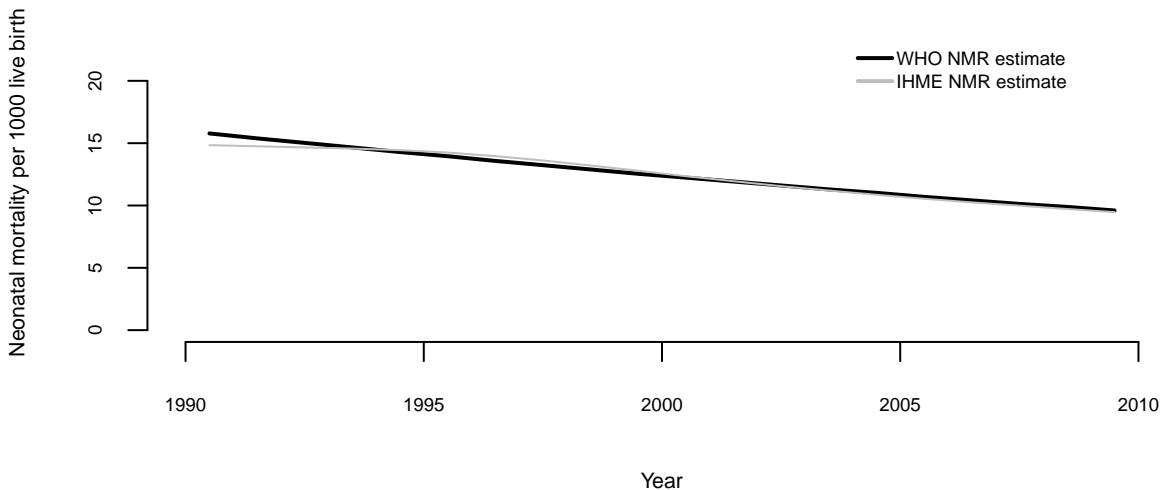

**Venezuela**  
**Percentage difference between WHO and IHME NMR estimates**

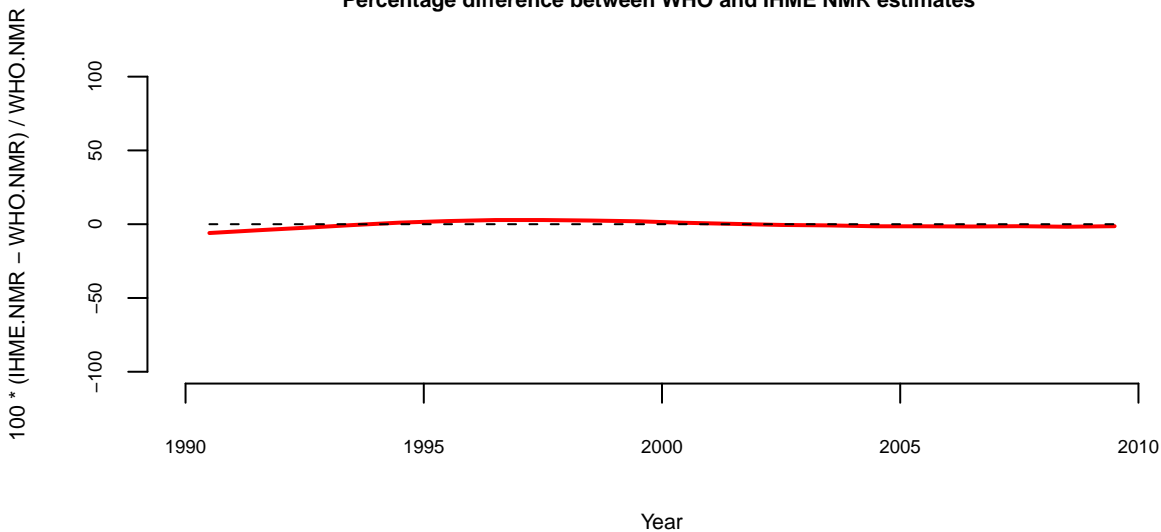

**Viet Nam**  
**Paired t-test: p-value = 2.2e-09**

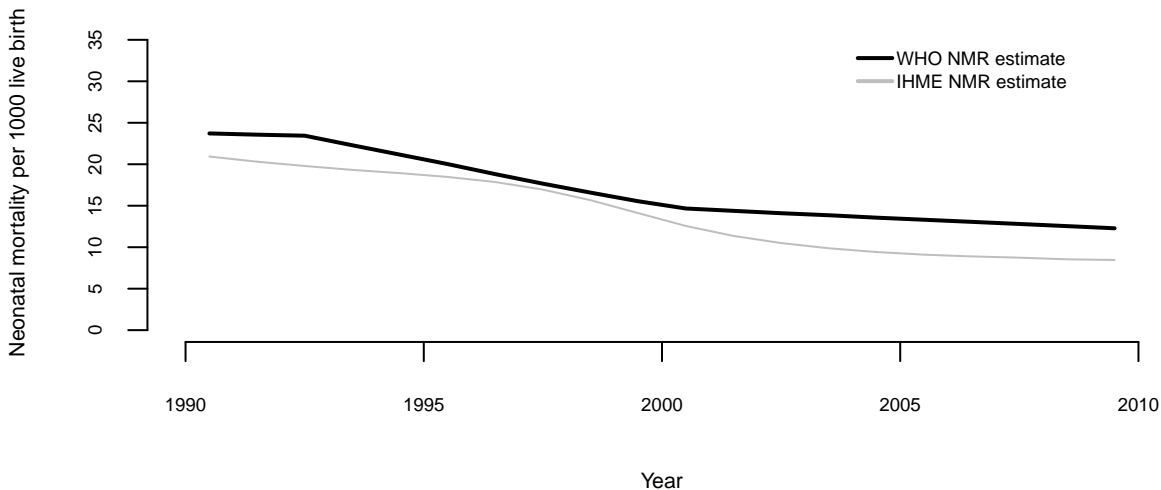

**Viet Nam**  
**Percentage difference between WHO and IHME NMR estimates**

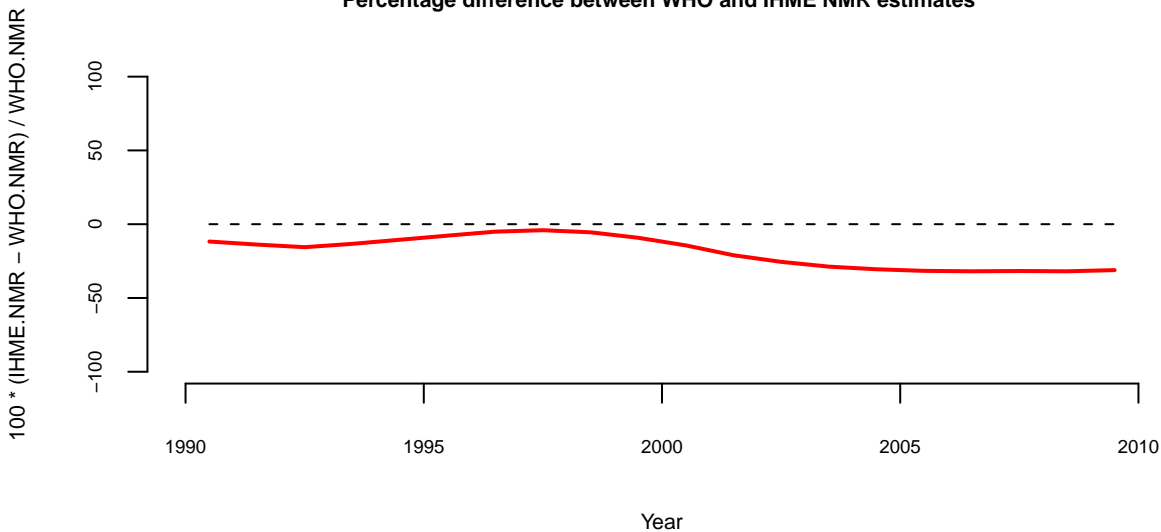

**Yemen**  
**Paired t-test: p-value = 0.14**

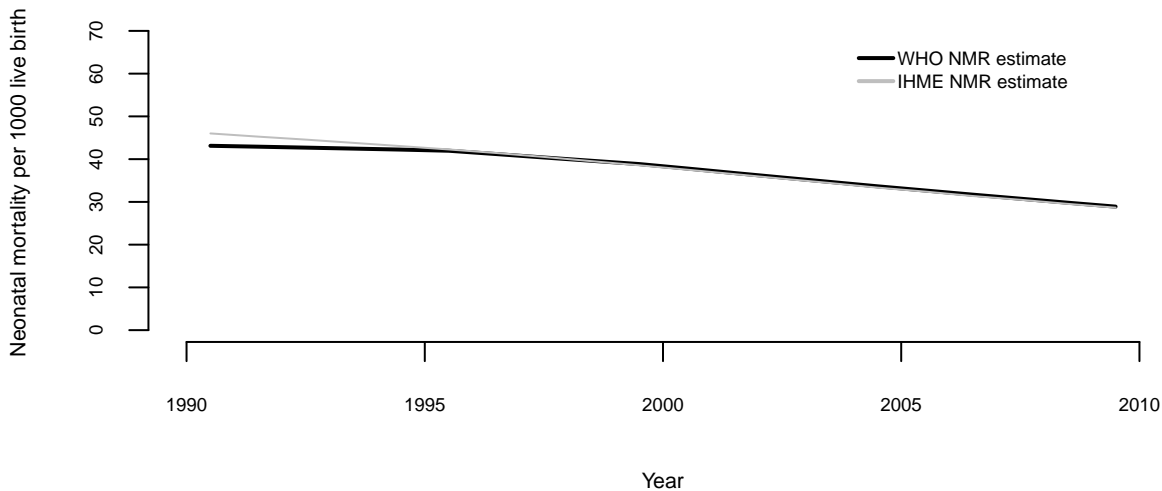

**Yemen**  
**Percentage difference between WHO and IHME NMR estimates**

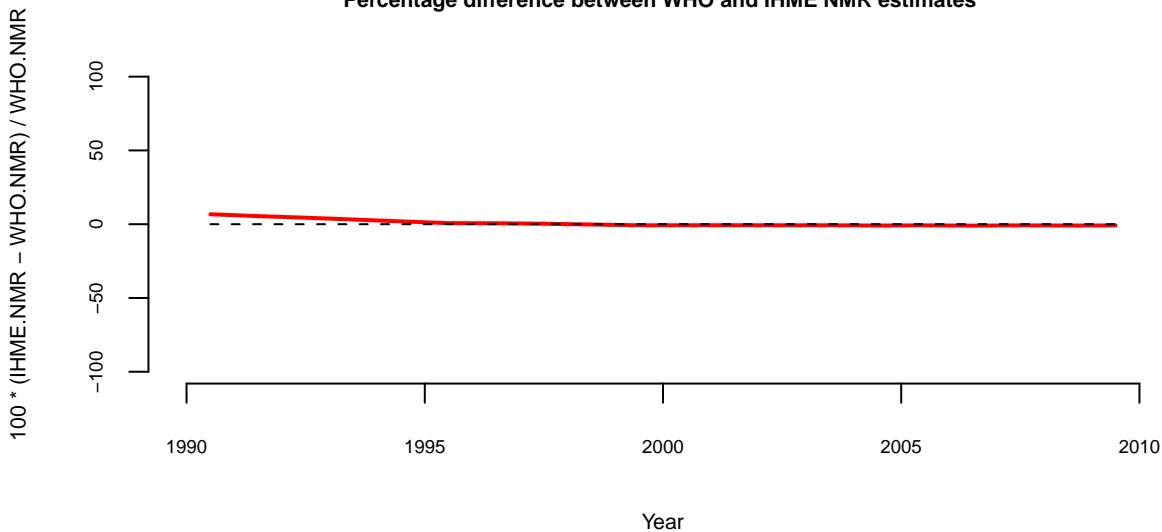

**Zambia**  
**Paired t-test: p-value = 3e-12**

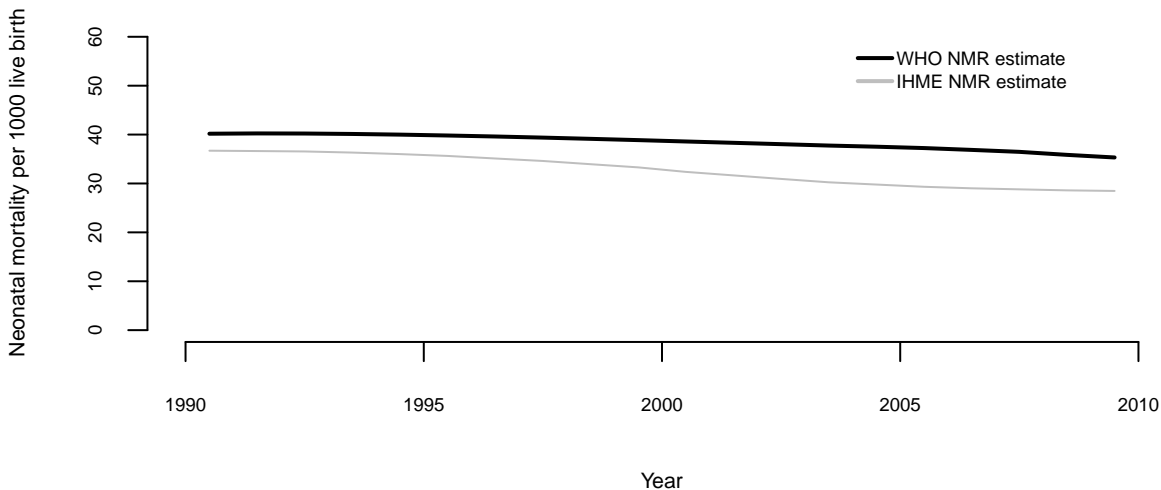

**Zambia**  
**Percentage difference between WHO and IHME NMR estimates**

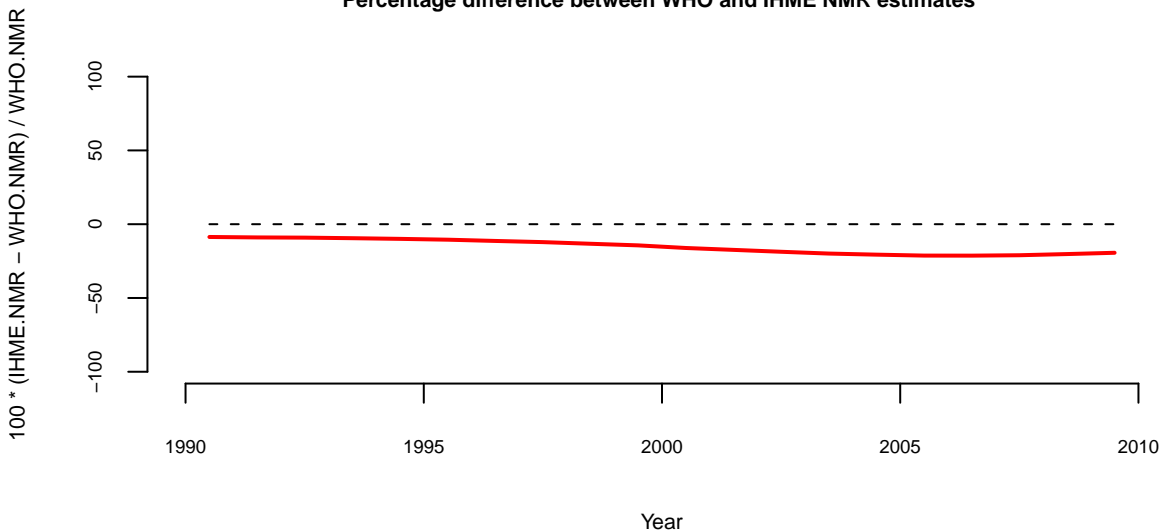

**Zimbabwe**  
**Paired t-test: p-value = 6.3e-13**

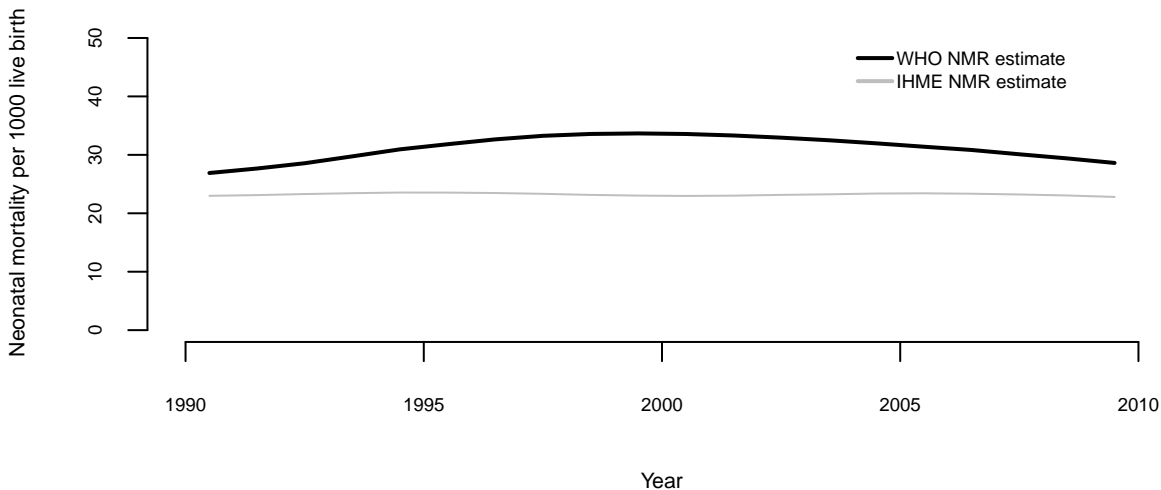

**Zimbabwe**  
**Percentage difference between WHO and IHME NMR estimates**

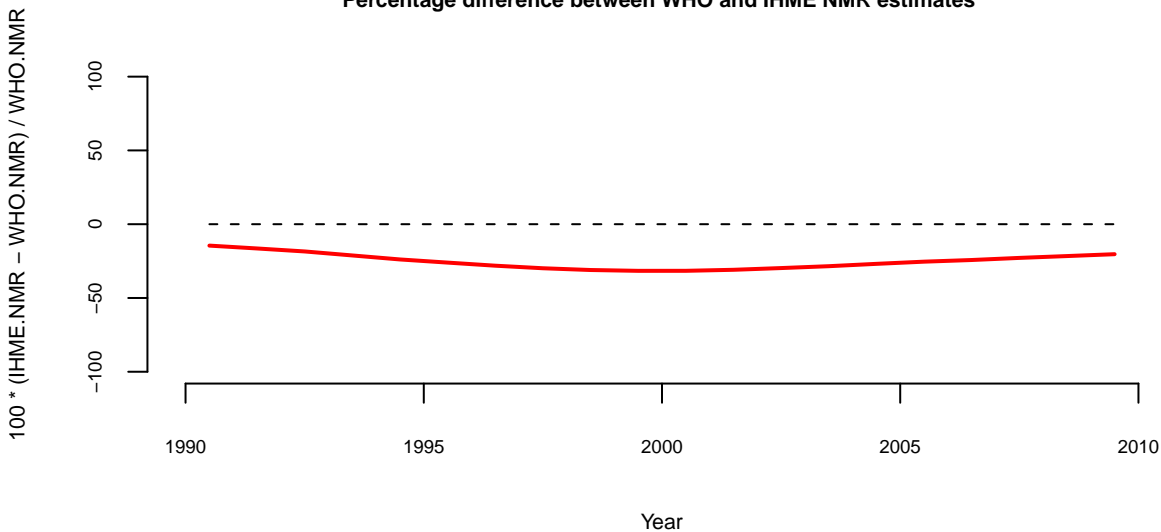

Supplement: pmed.1001080.s003.pdf [file pmed.1001080.s003.pdf]
