# Supplementary material
Source: PubMed Central journal article supplement (PMC3168874)

2009

Comparison of WHO and IHME NMR estimates across countries

Countries with greater than ( $\pm$ )25% relative difference are indicated

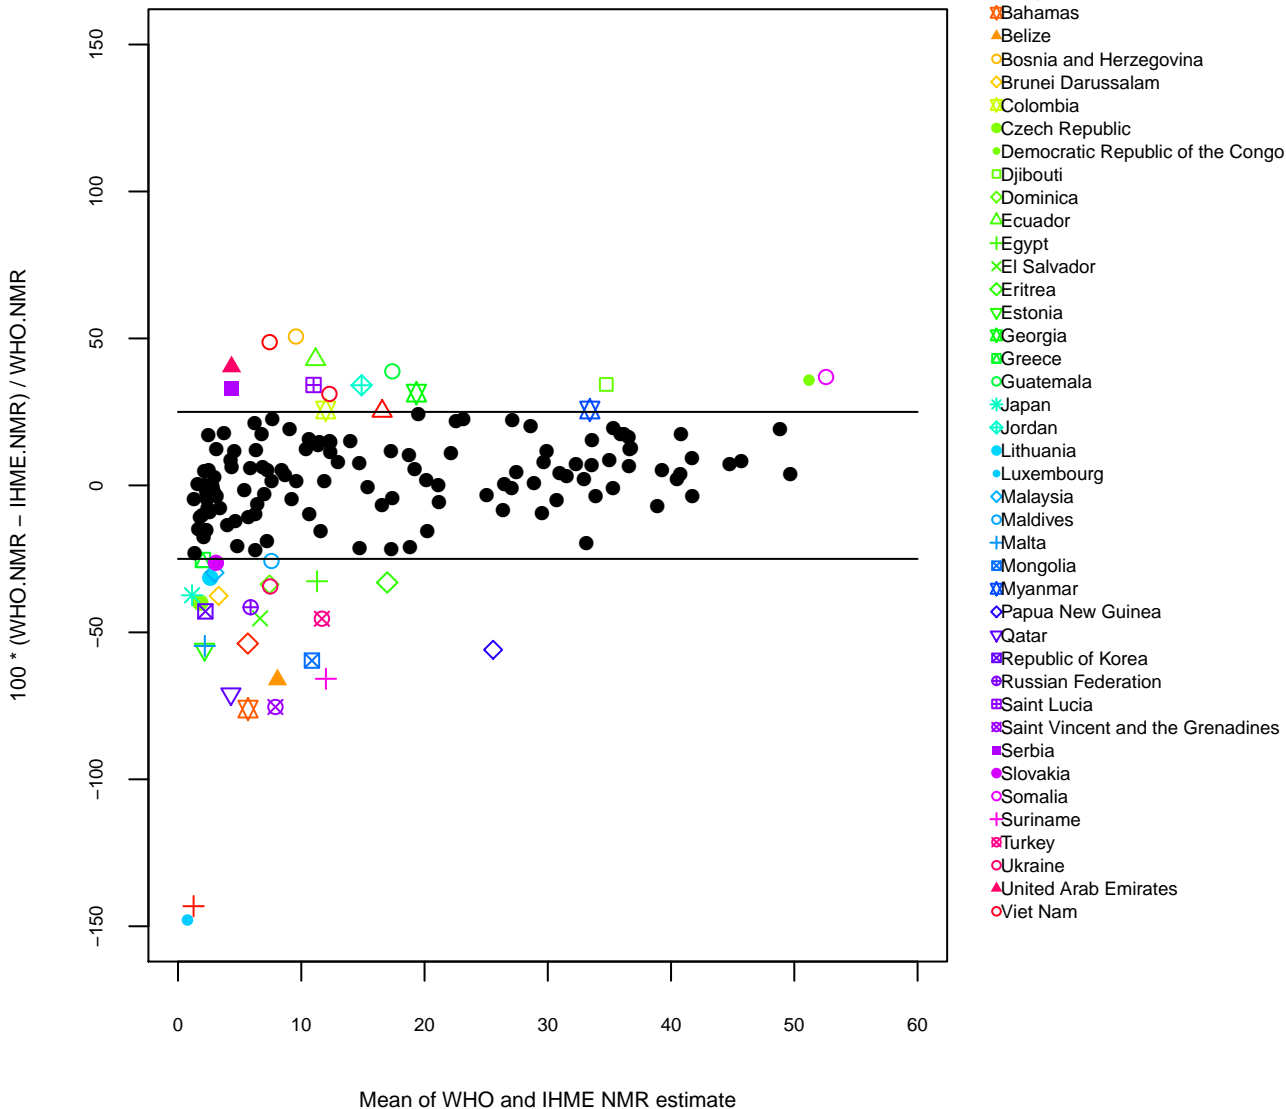

2008  
**Comparison of WHO and IHME NMR estimates across countries**  
**Countries with greater than ( $\pm$ )25% relative difference are indicated**

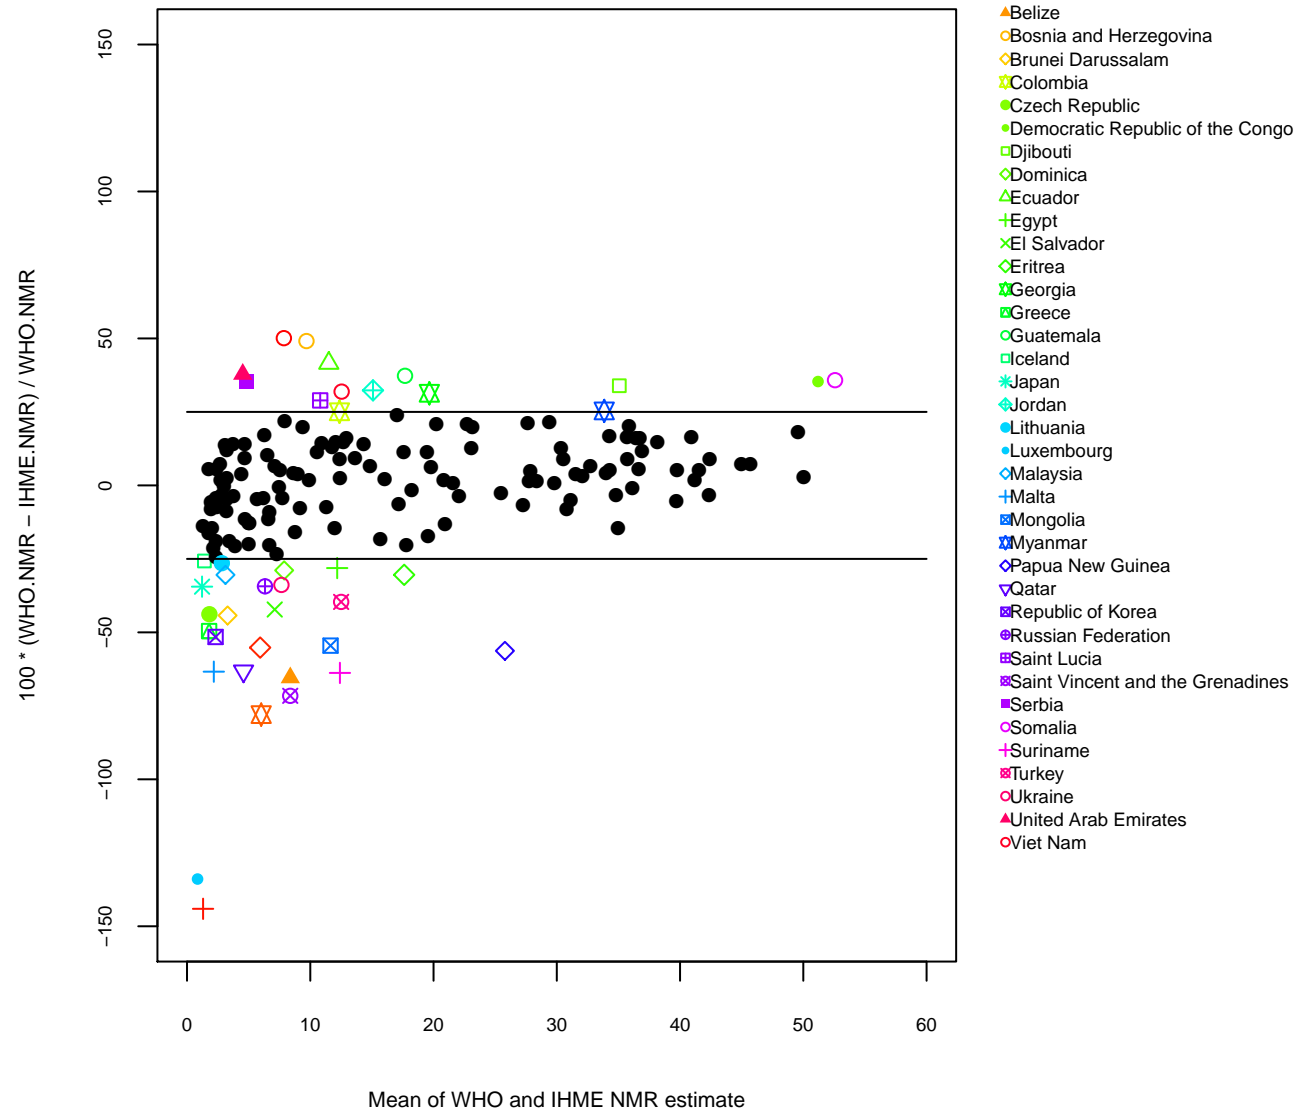

2007

Comparison of WHO and IHME NMR estimates across countries

Countries with greater than ( $\pm$ )25% relative difference are indicated

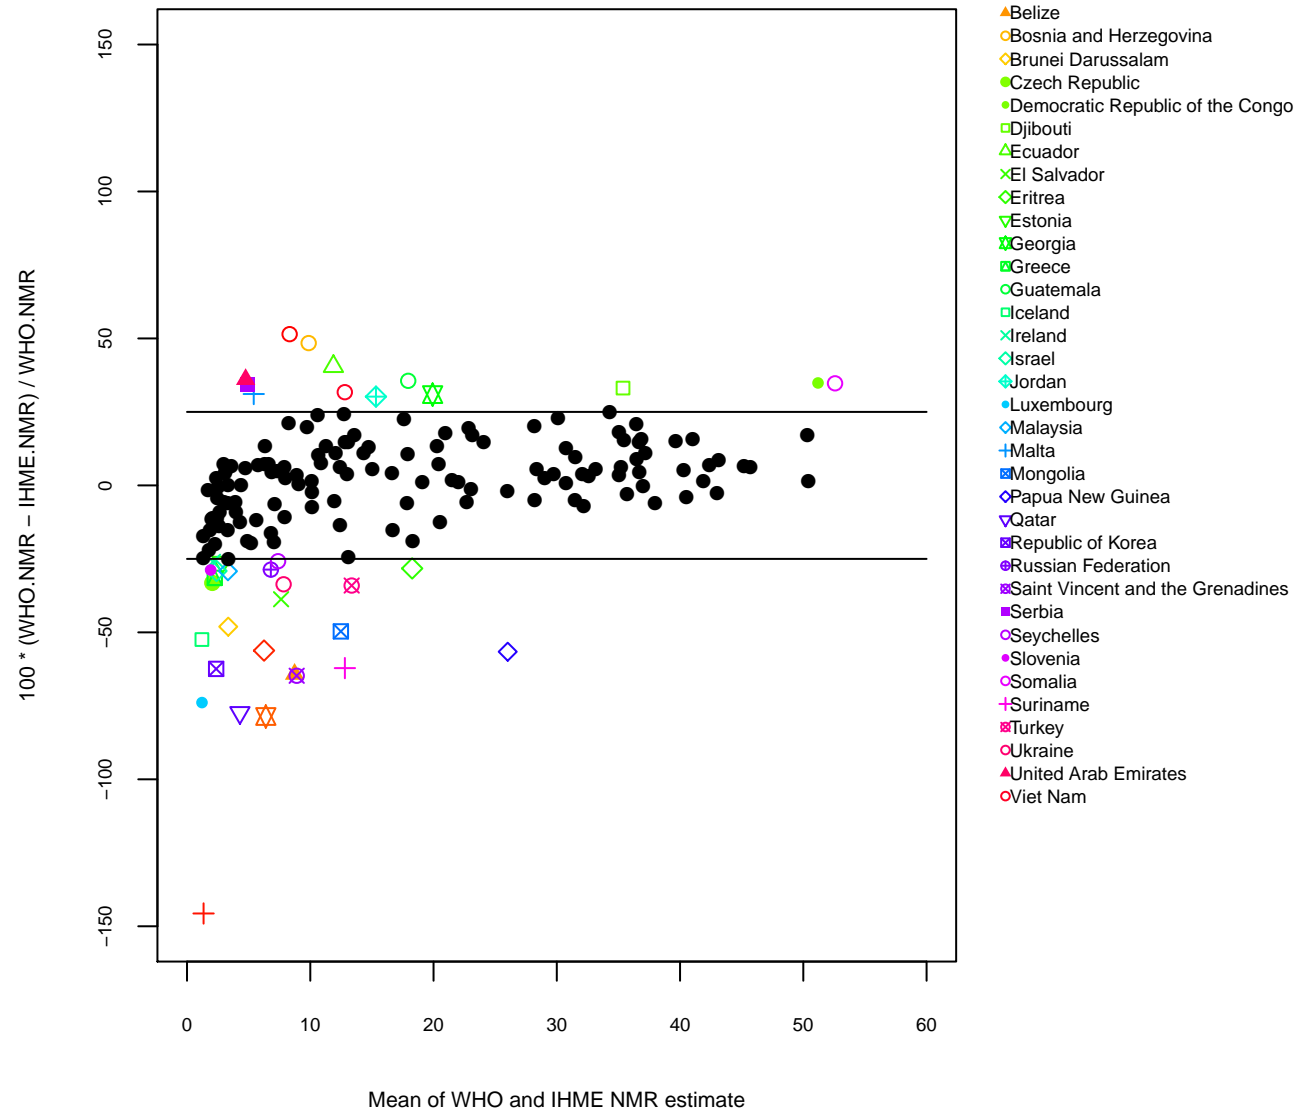

2006  
**Comparison of WHO and IHME NMR estimates across countries**  
**Countries with greater than (→)25% relative difference are indicated**

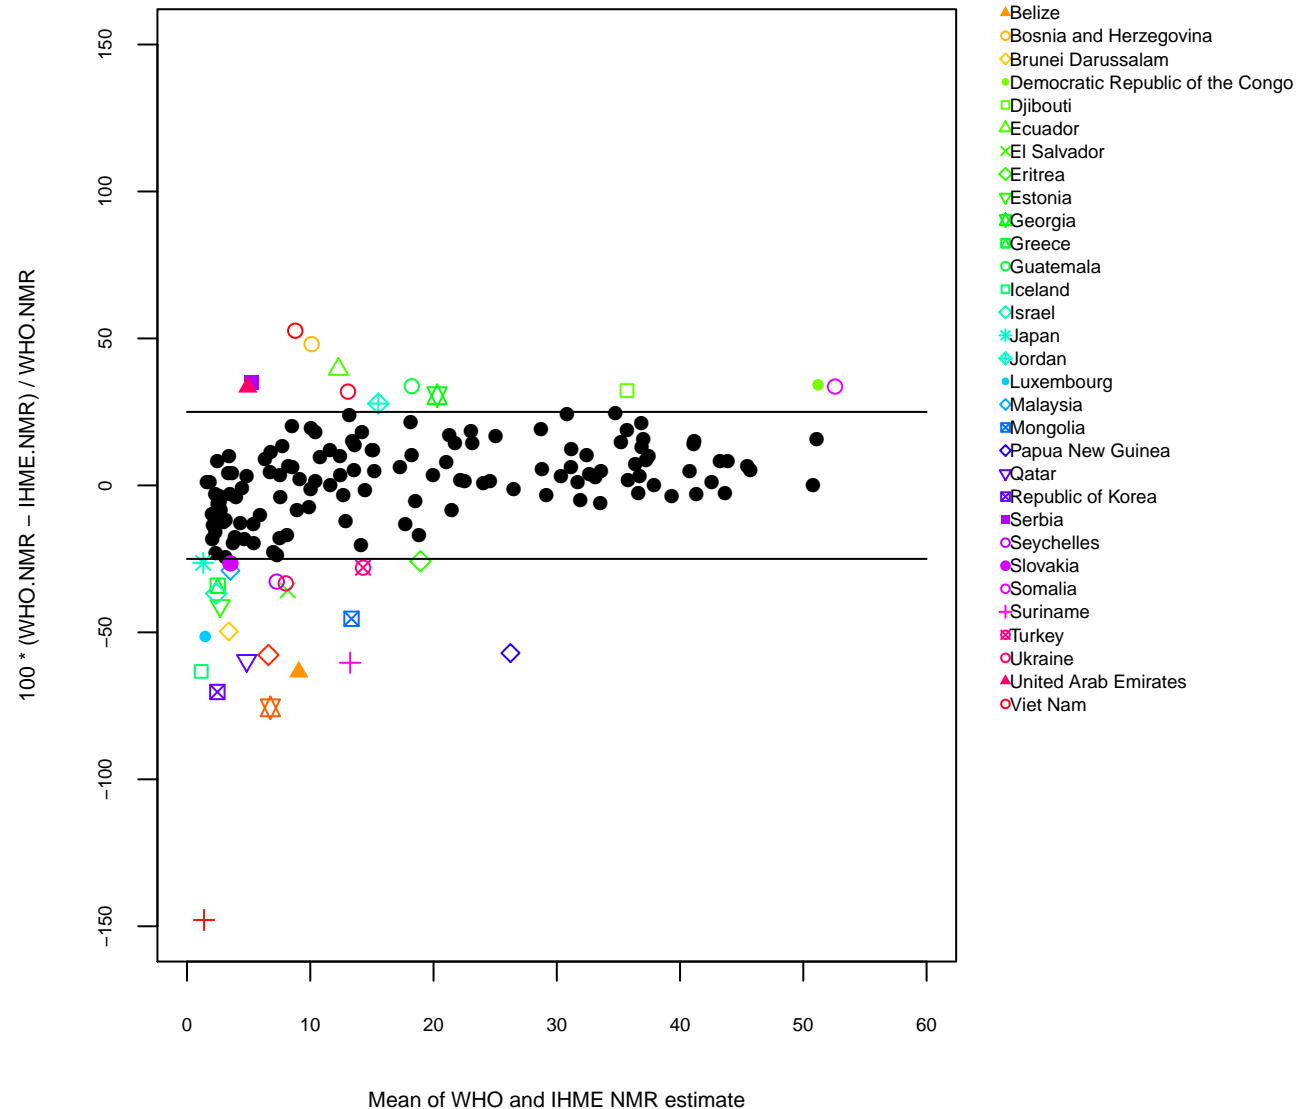

2005  
**Comparison of WHO and IHME NMR estimates across countries**  
**Countries with greater than (→)25% relative difference are indicated**

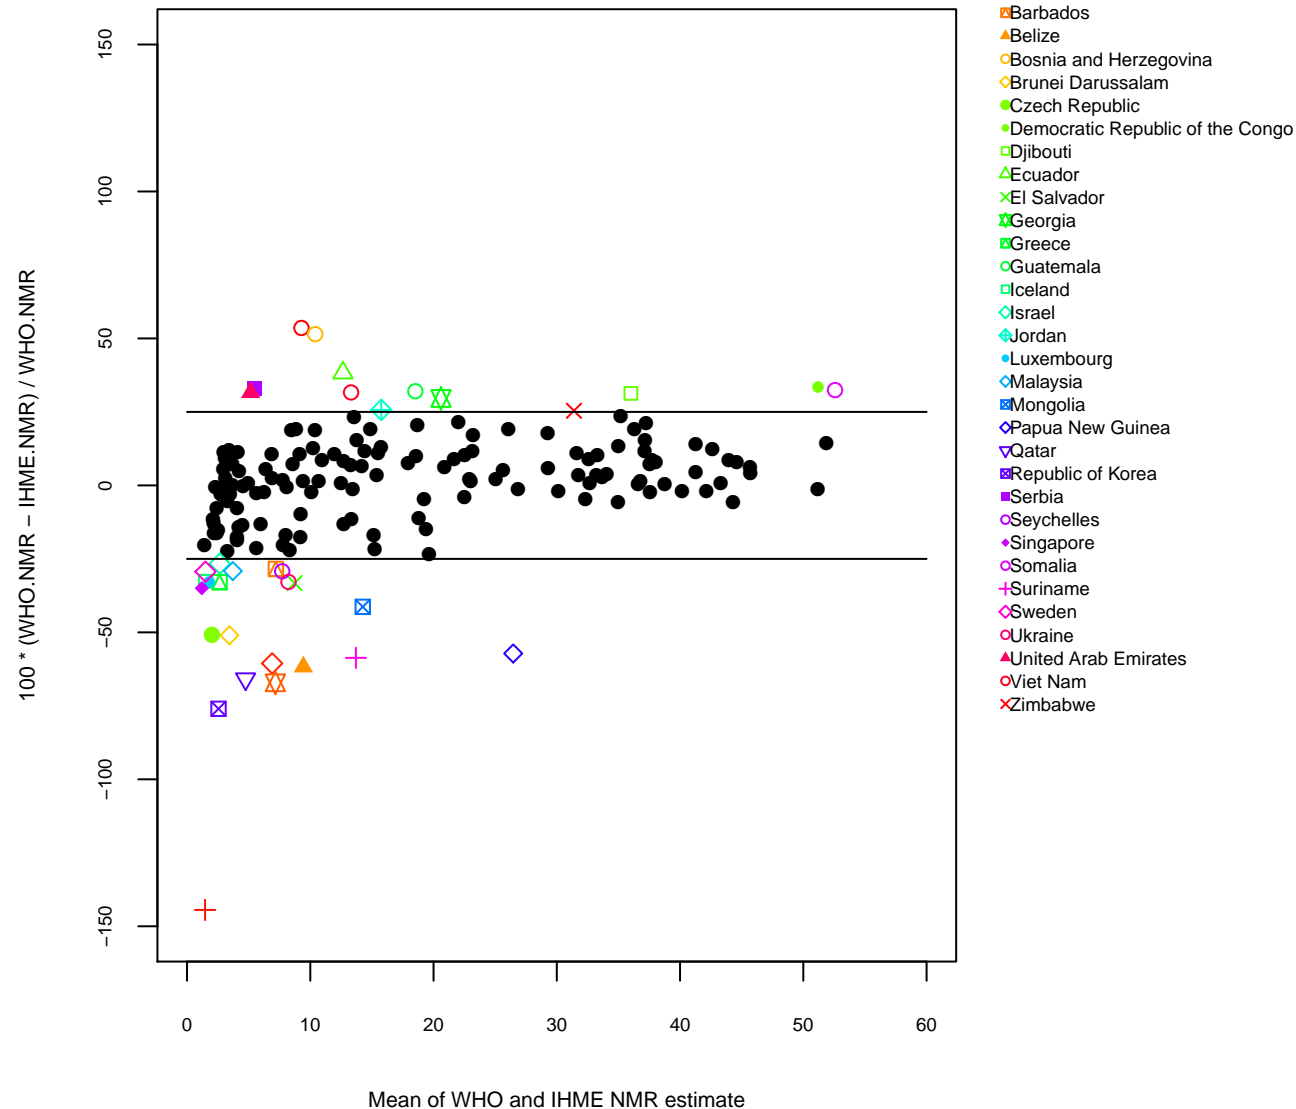

2004  
**Comparison of WHO and IHME NMR estimates across countries**  
**Countries with greater than (→)25% relative difference are indicated**

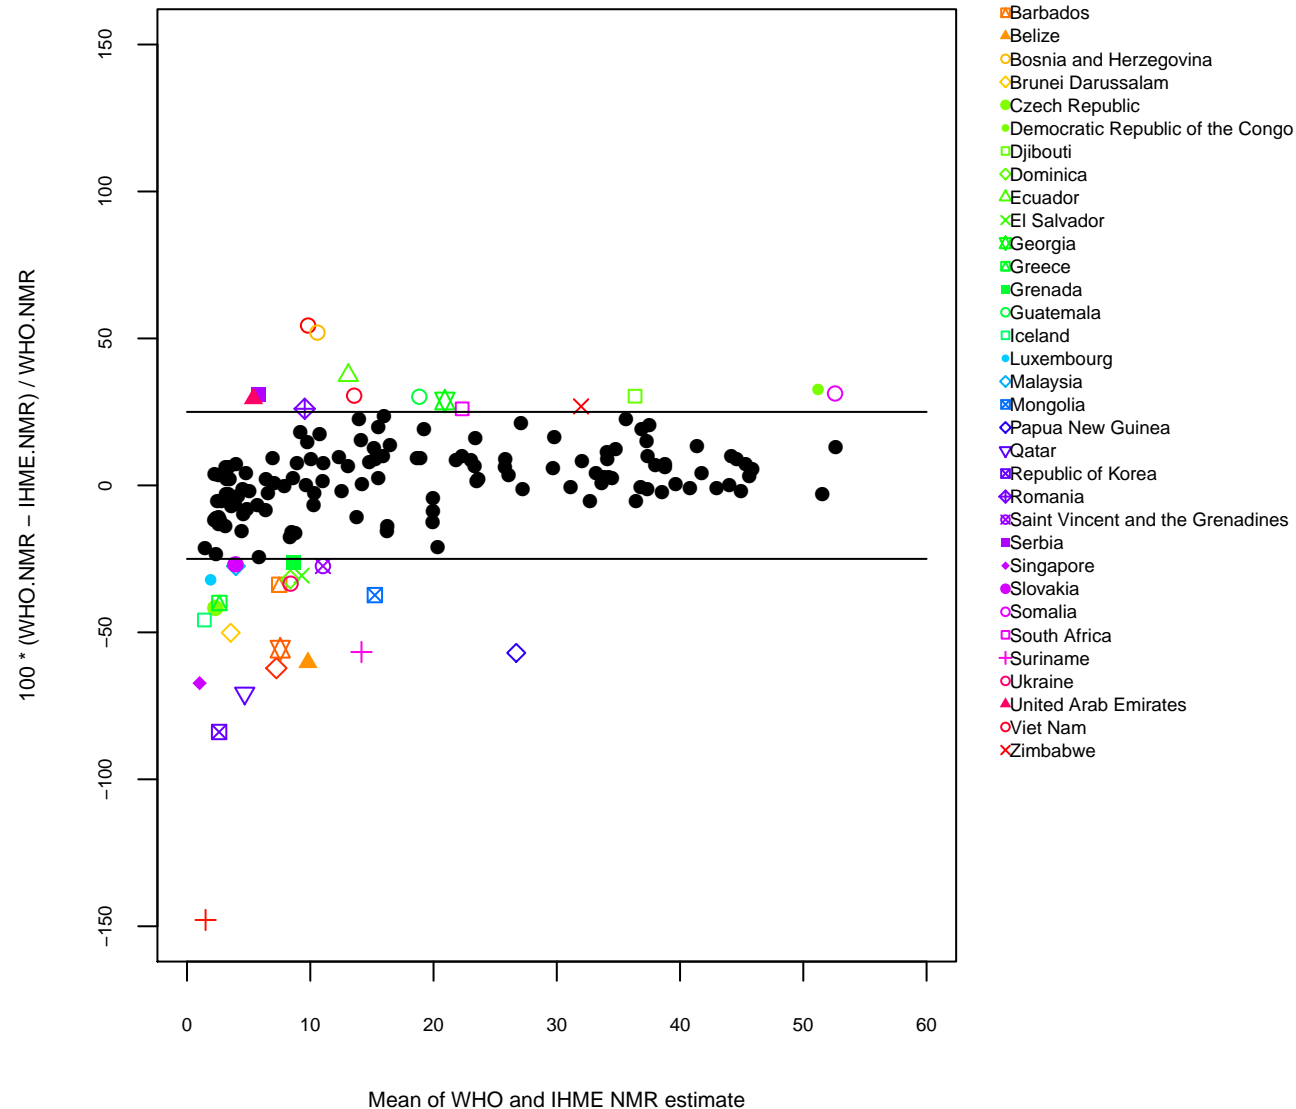

2003  
**Comparison of WHO and IHME NMR estimates across countries**  
**Countries with greater than (→)25% relative difference are indicated**

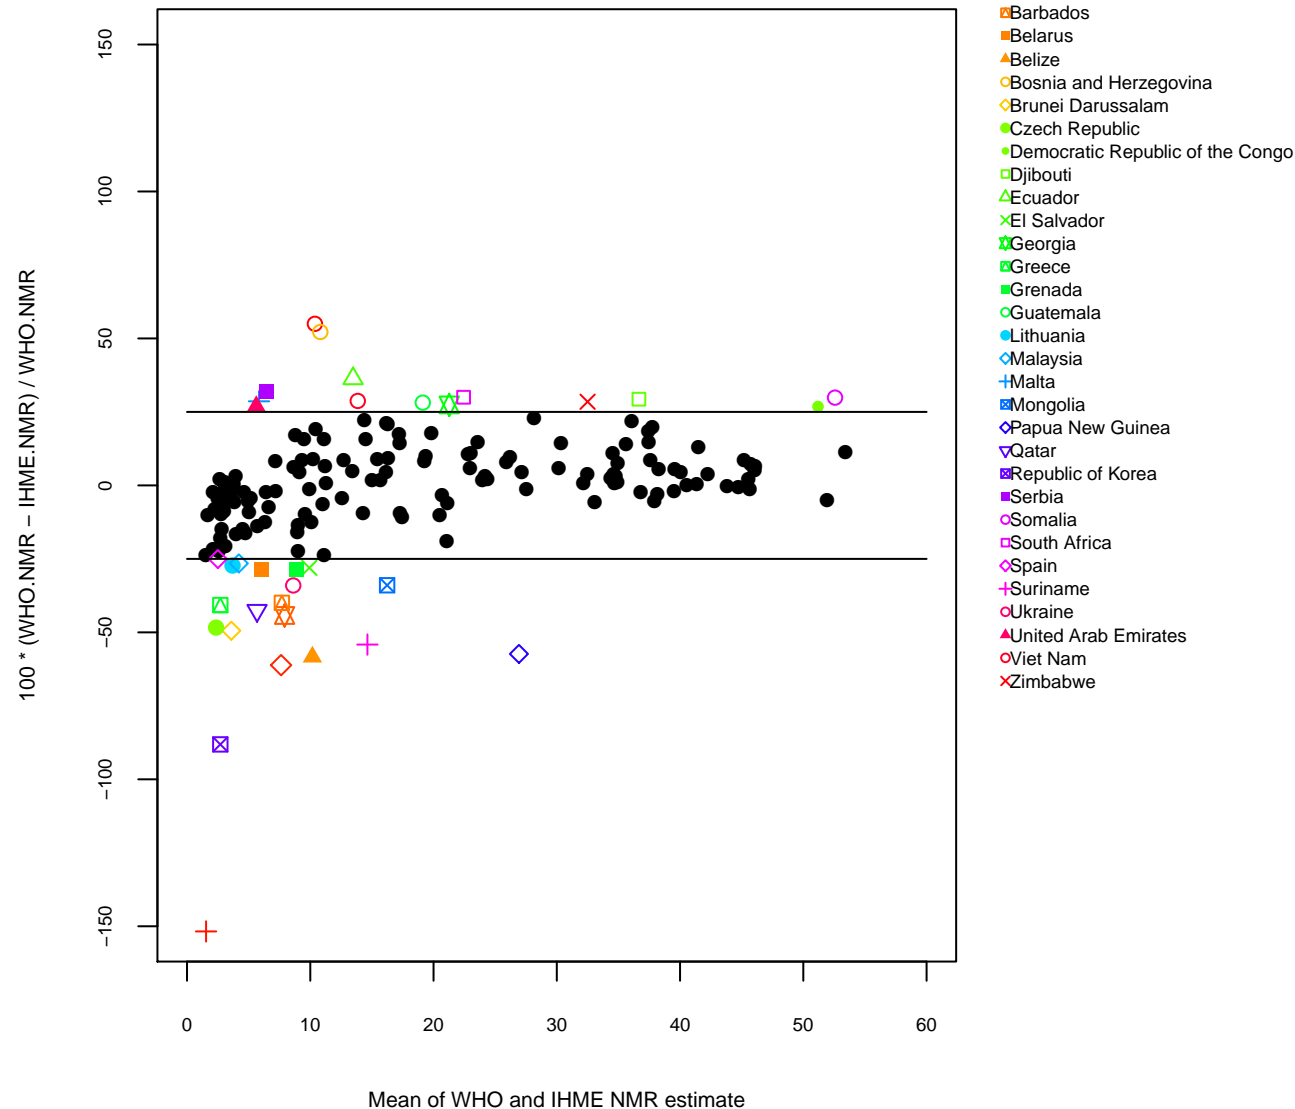

2002  
**Comparison of WHO and IHME NMR estimates across countries**  
**Countries with greater than (→)25% relative difference are indicated**

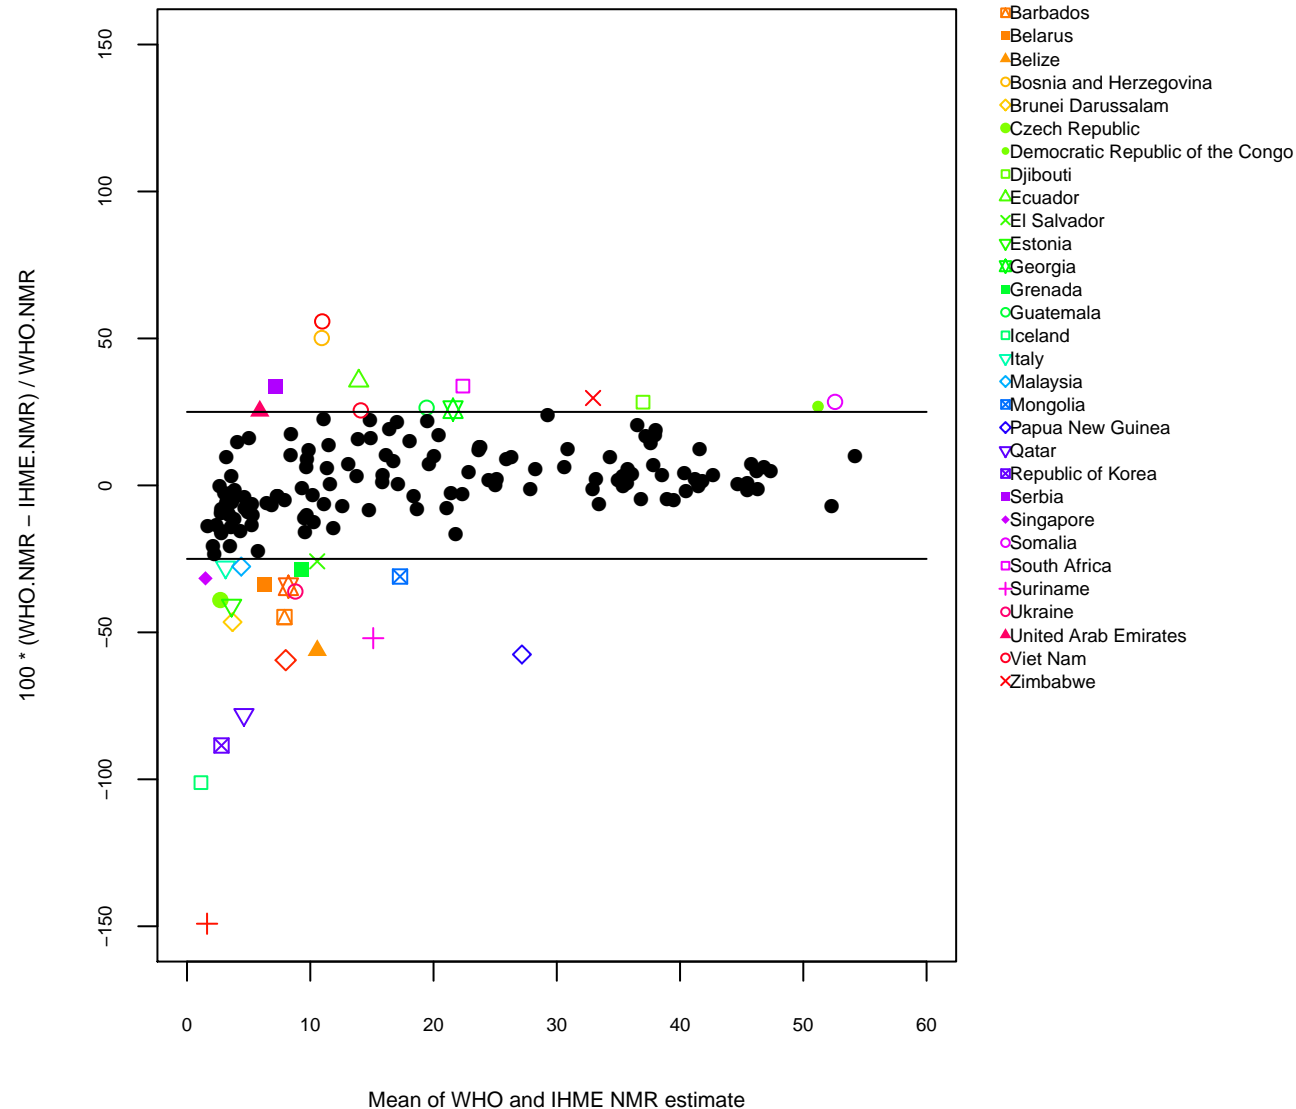

2001  
**Comparison of WHO and IHME NMR estimates across countries**  
**Countries with greater than ( $\pm$ )25% relative difference are indicated**

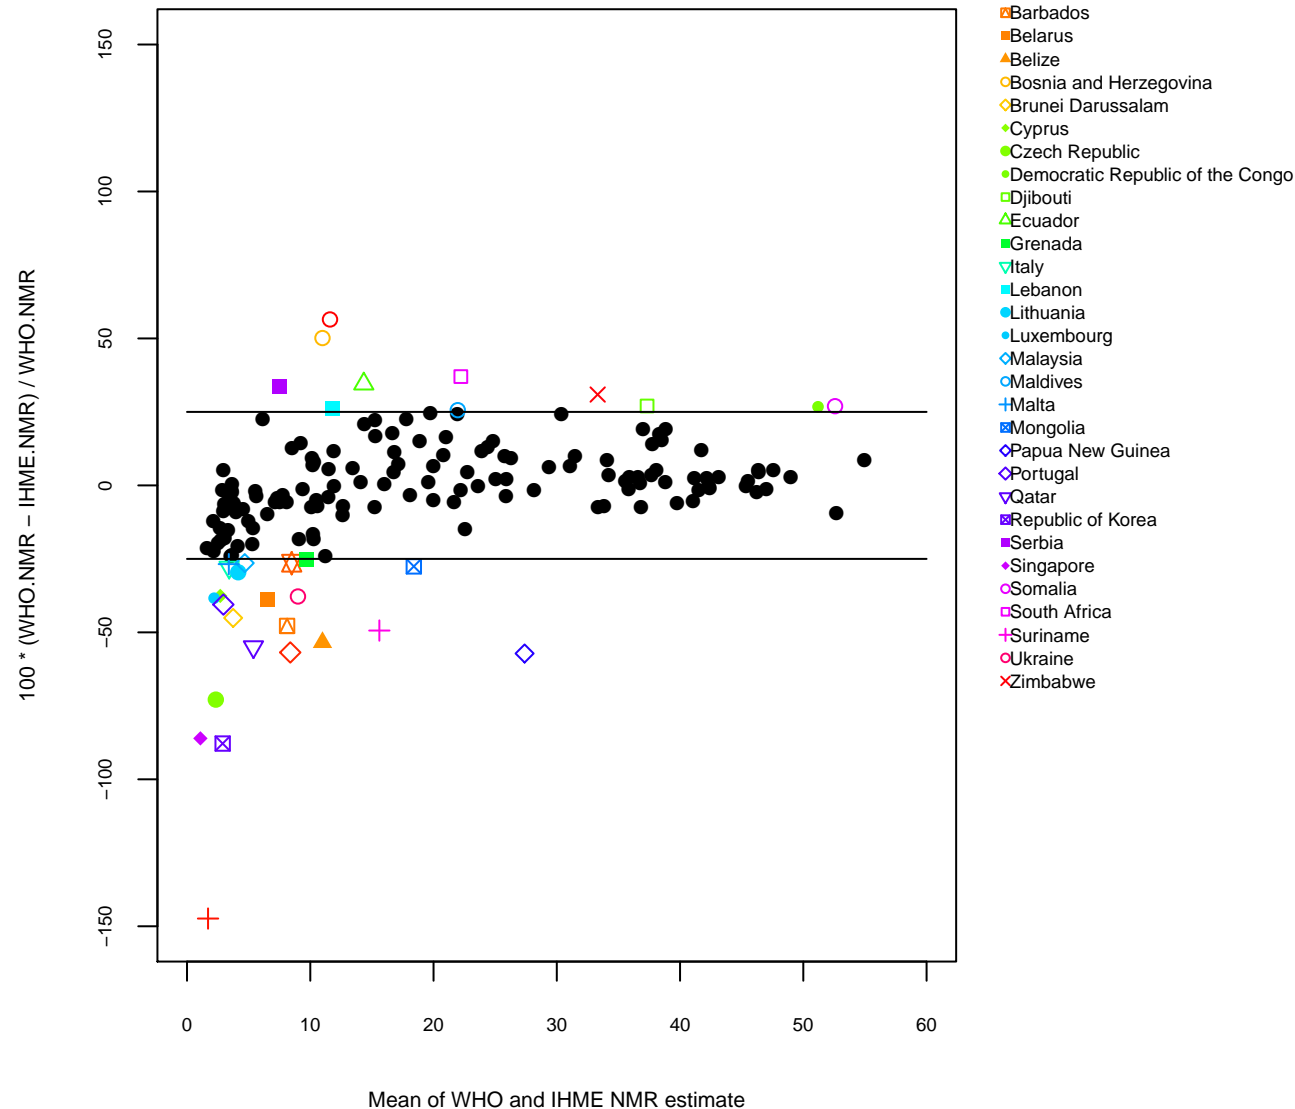

2000

Comparison of WHO and IHME NMR estimates across countries

Countries with greater than ( $\pm$ )25% relative difference are indicated

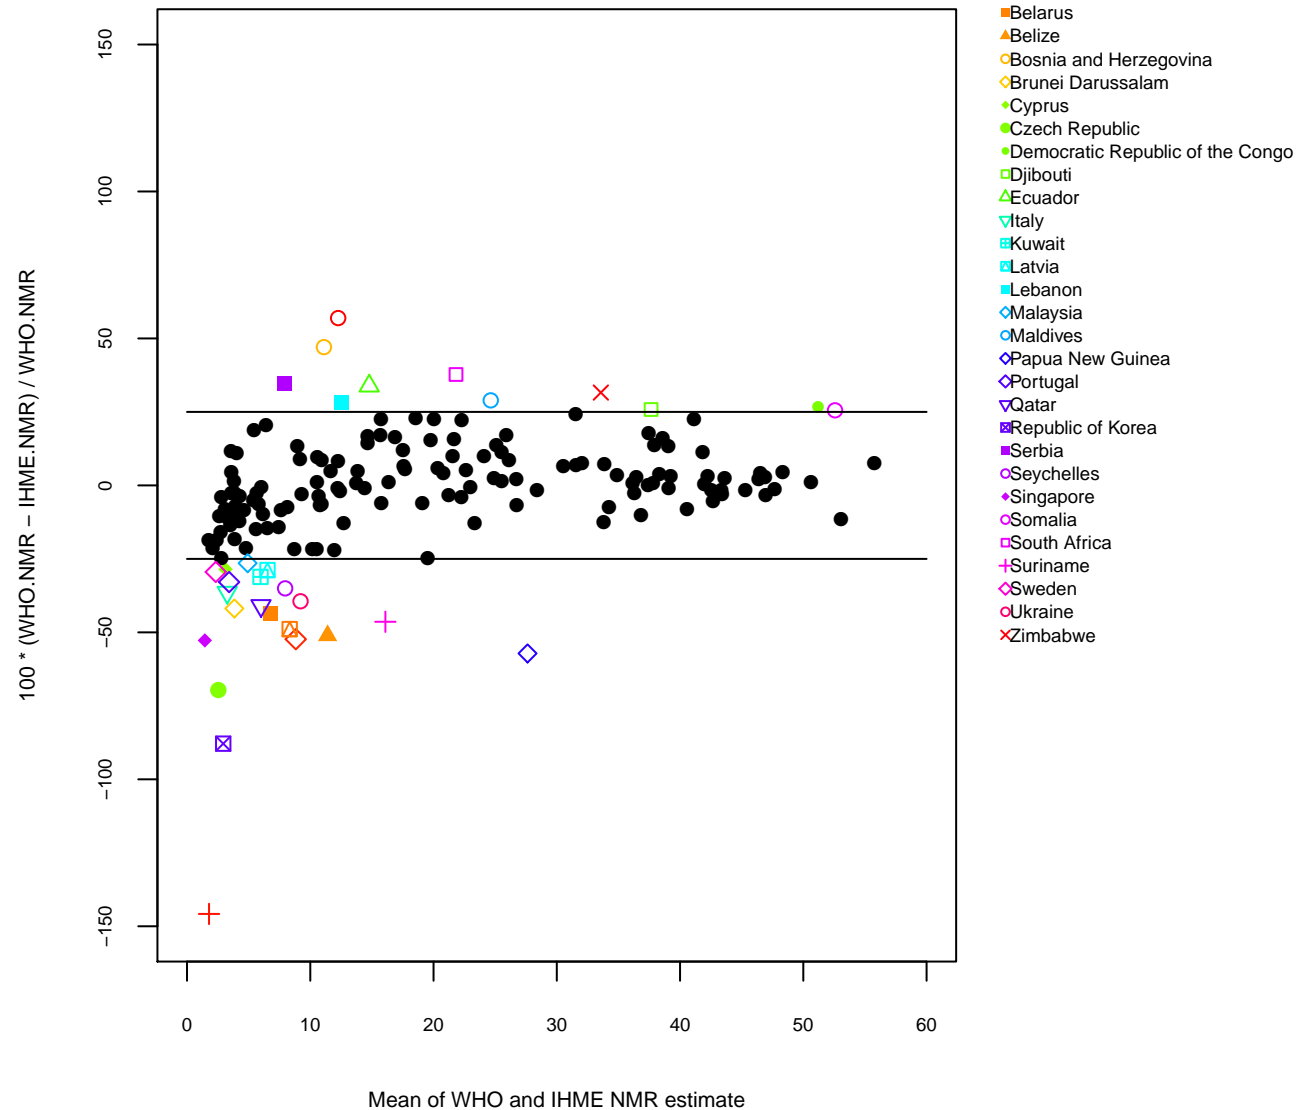

1999

Comparison of WHO and IHME NMR estimates across countries

Countries with greater than ( $\pm$ )25% relative difference are indicated

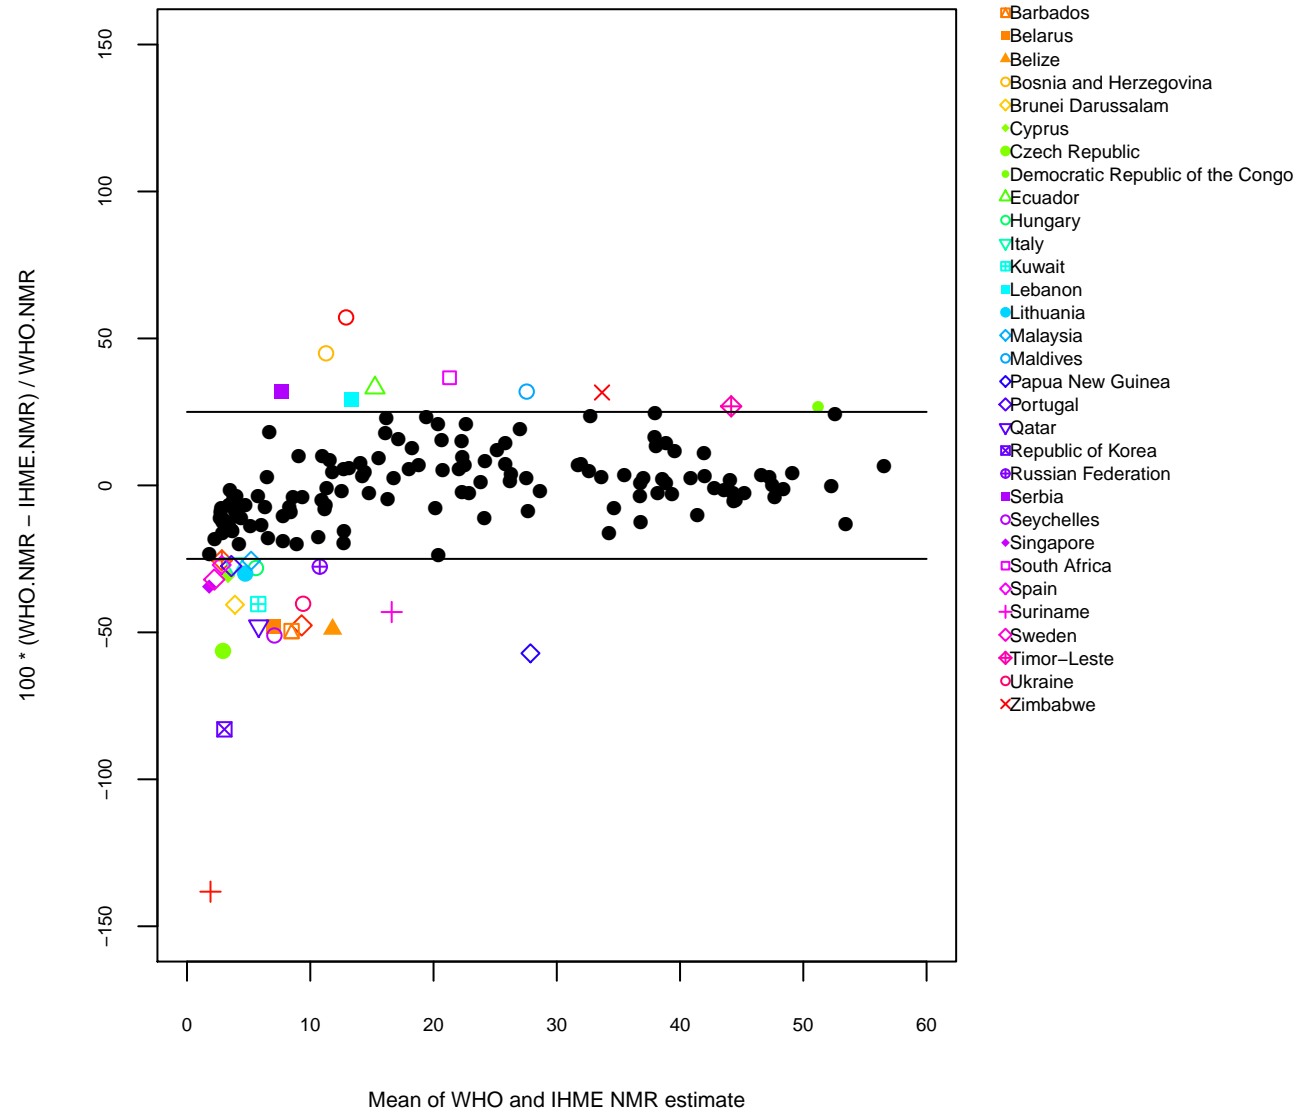

1998

Comparison of WHO and IHME NMR estimates across countries

Countries with greater than ( $\pm$ )25% relative difference are indicated

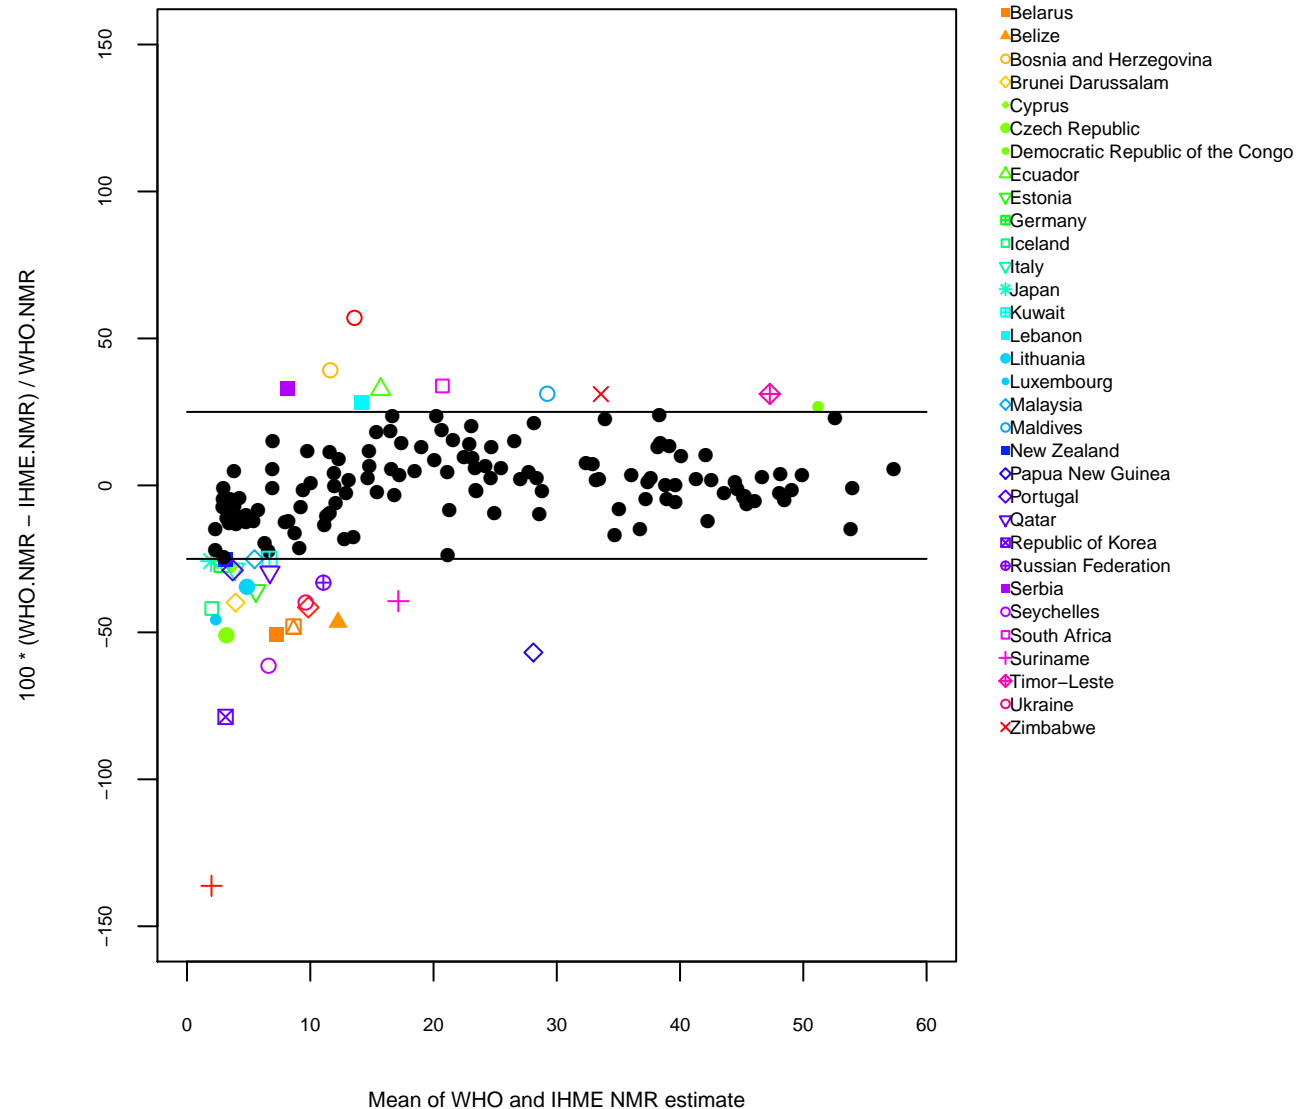

1997

Comparison of WHO and IHME NMR estimates across countries

Countries with greater than ( $\pm$ )25% relative difference are indicated

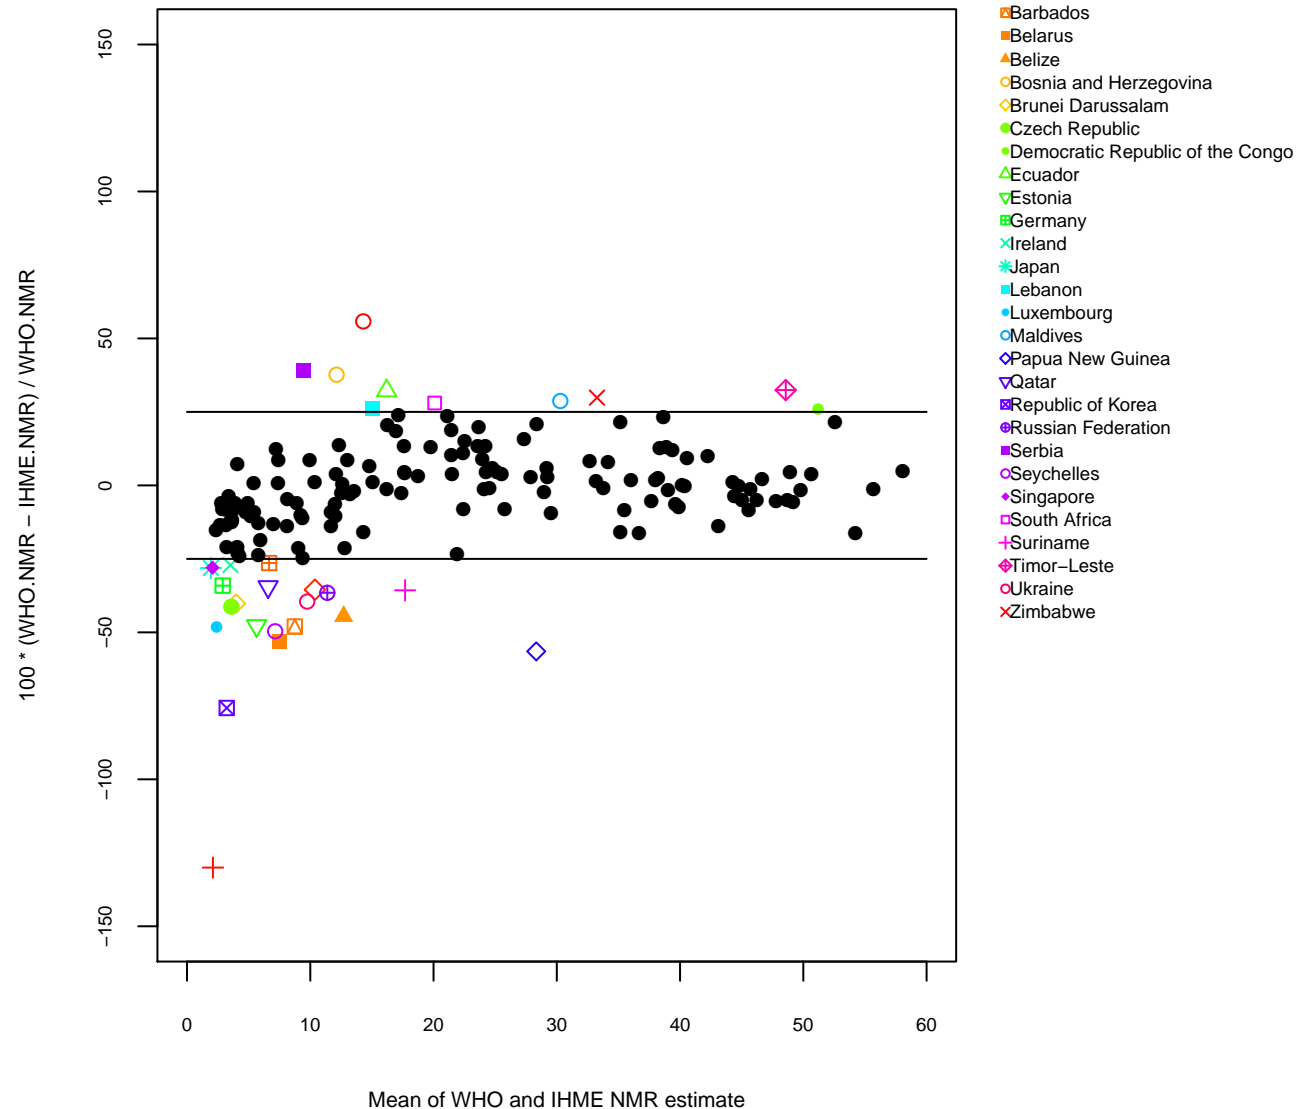

1996

**Comparison of WHO and IHME NMR estimates across countries**

Countries with greater than ( $\pm$ )25% relative difference are indicated

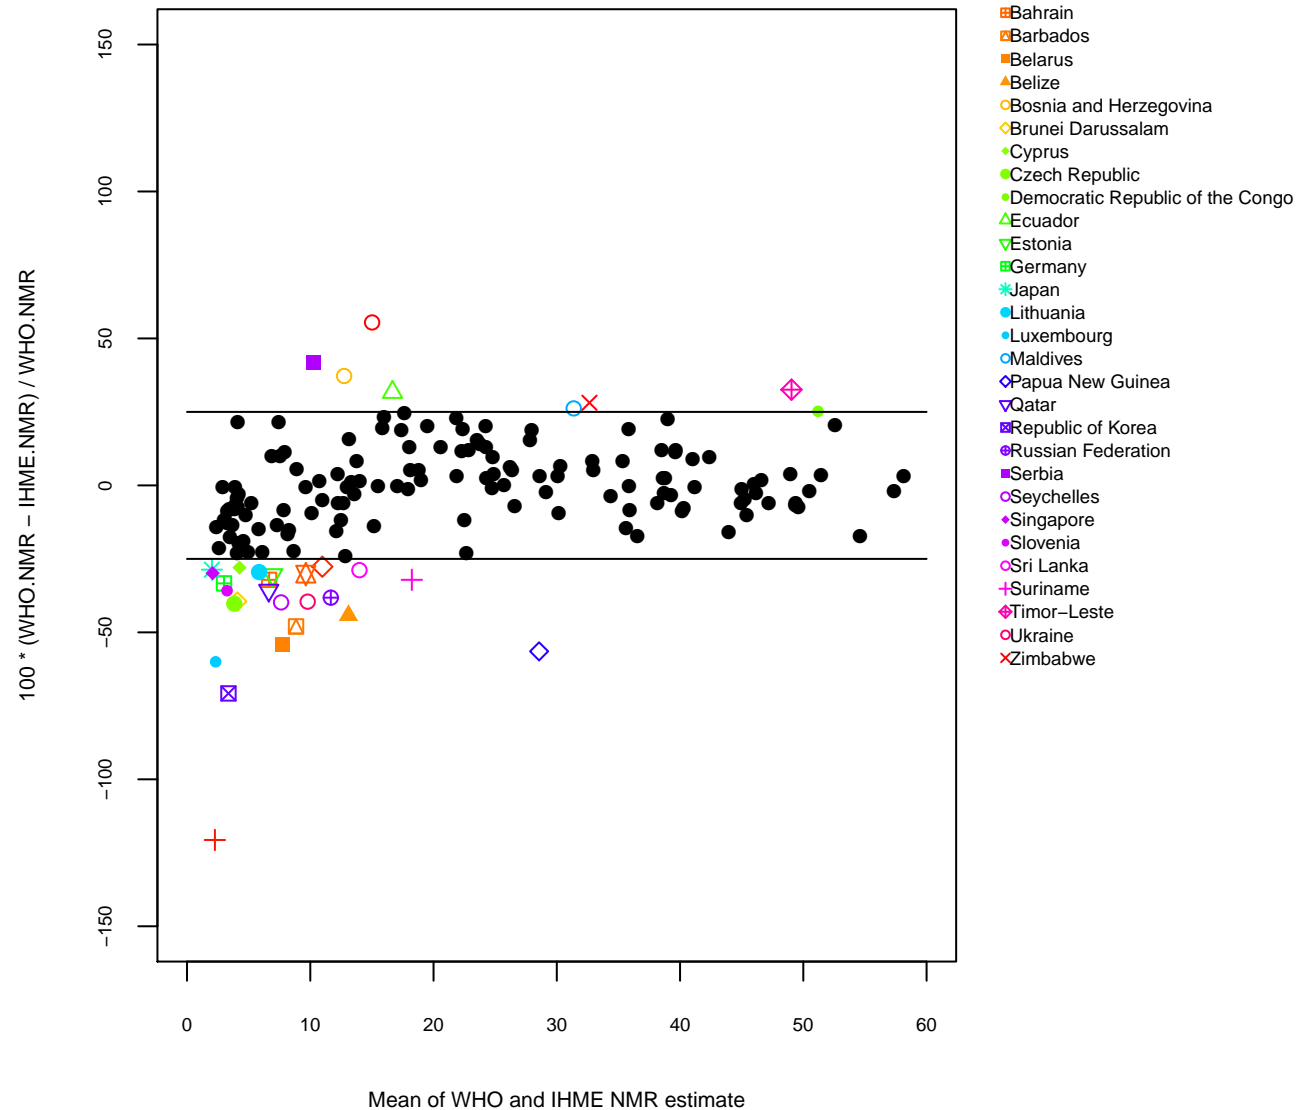

1995

Comparison of WHO and IHME NMR estimates across countries

Countries with greater than ( $\pm$ )25% relative difference are indicated

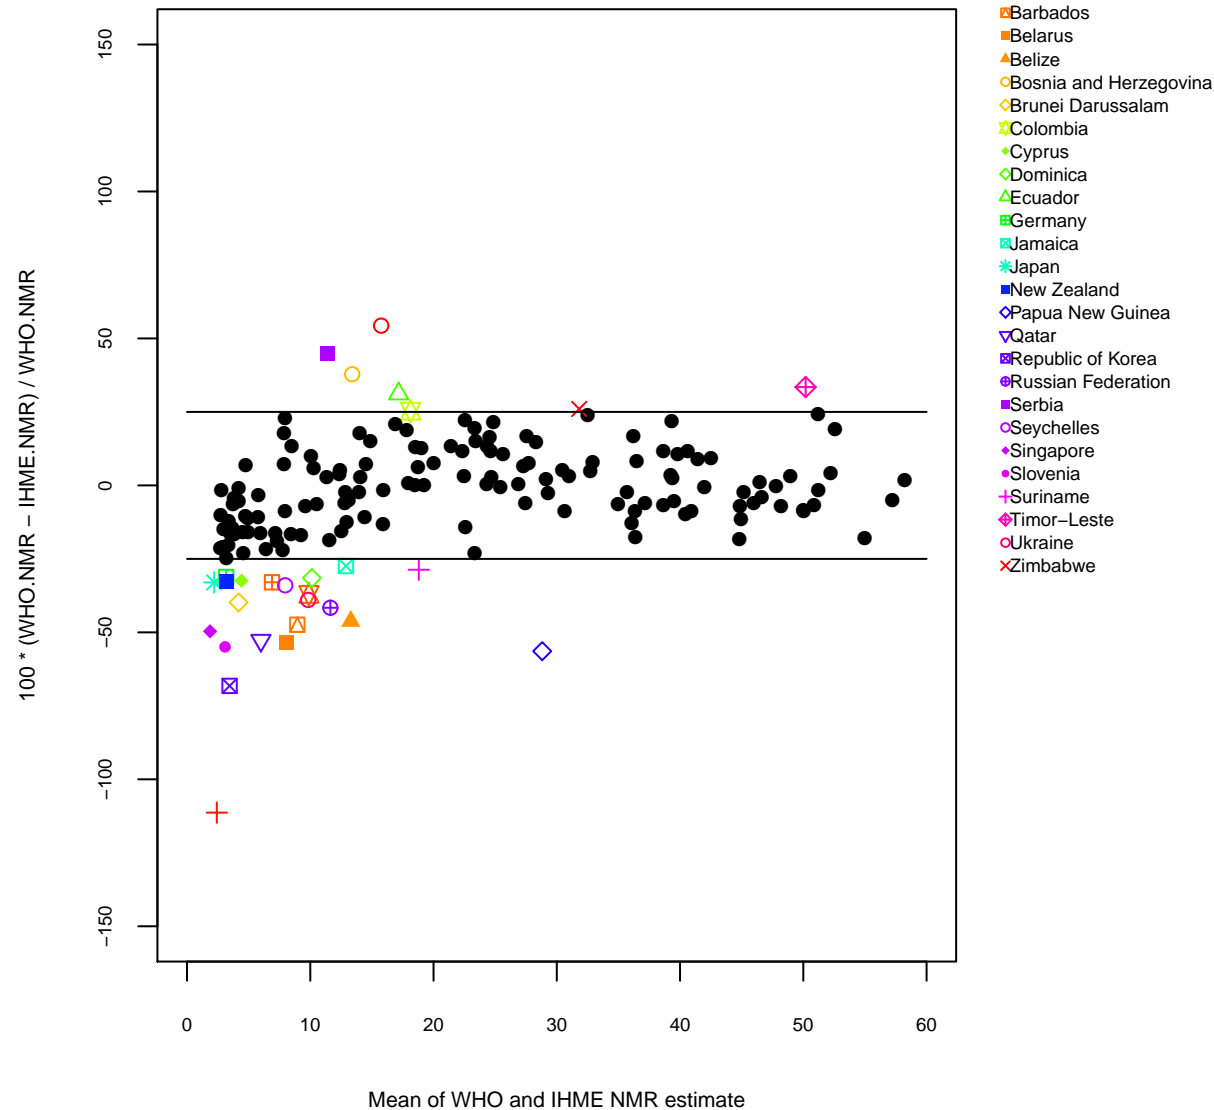

1994

Comparison of WHO and IHME NMR estimates across countries

Countries with greater than ( $\pm$ )25% relative difference are indicated

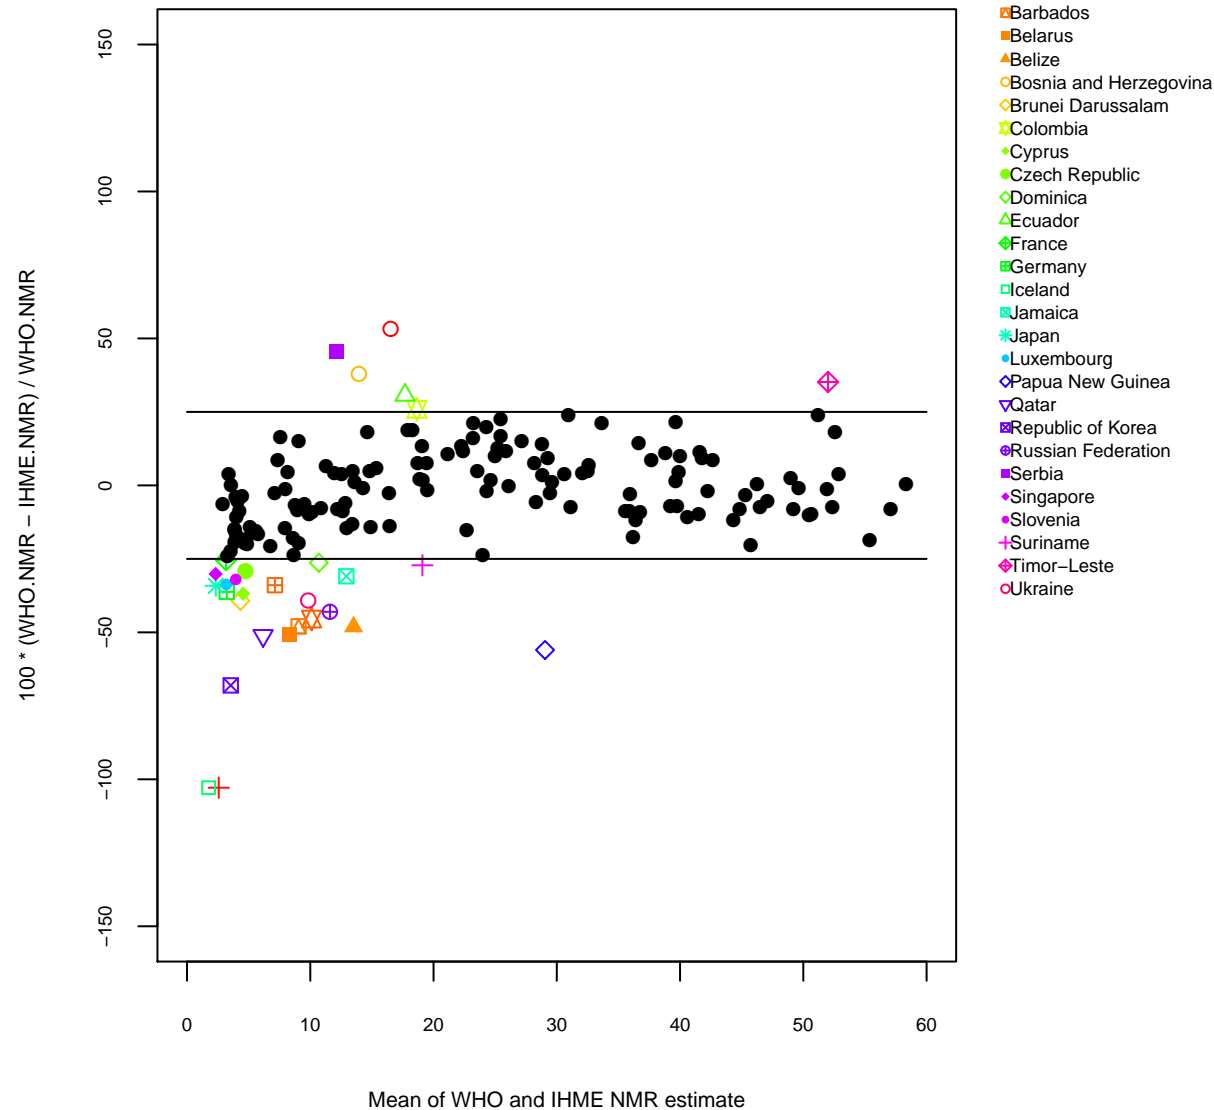

1993

Comparison of WHO and IHME NMR estimates across countries

Countries with greater than ( $\pm$ )25% relative difference are indicated

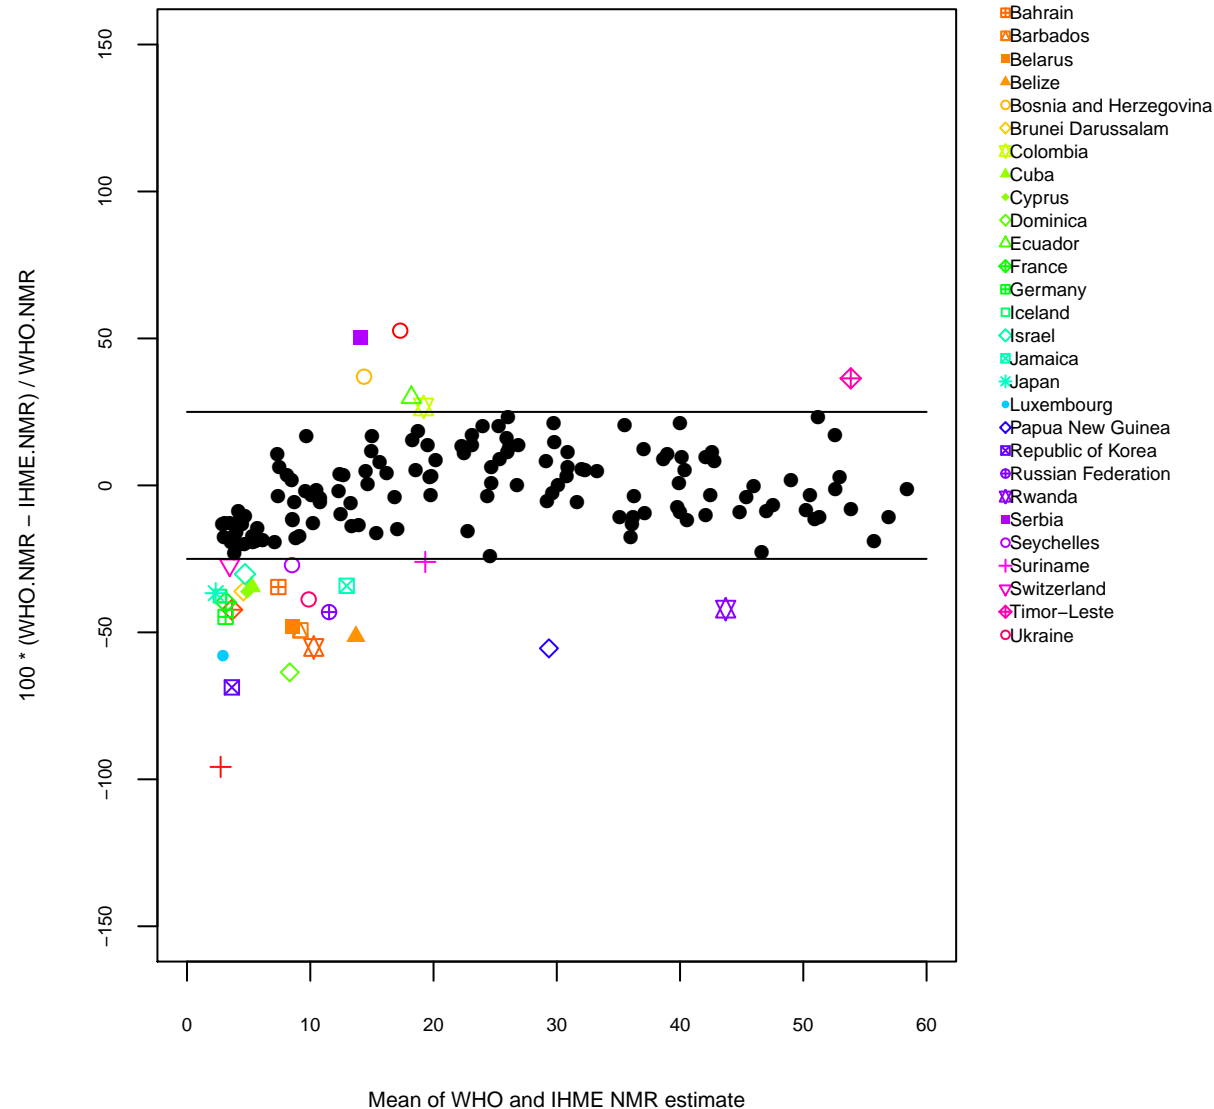

1992

Comparison of WHO and IHME NMR estimates across countries

Countries with greater than ( $\pm$ )25% relative difference are indicated

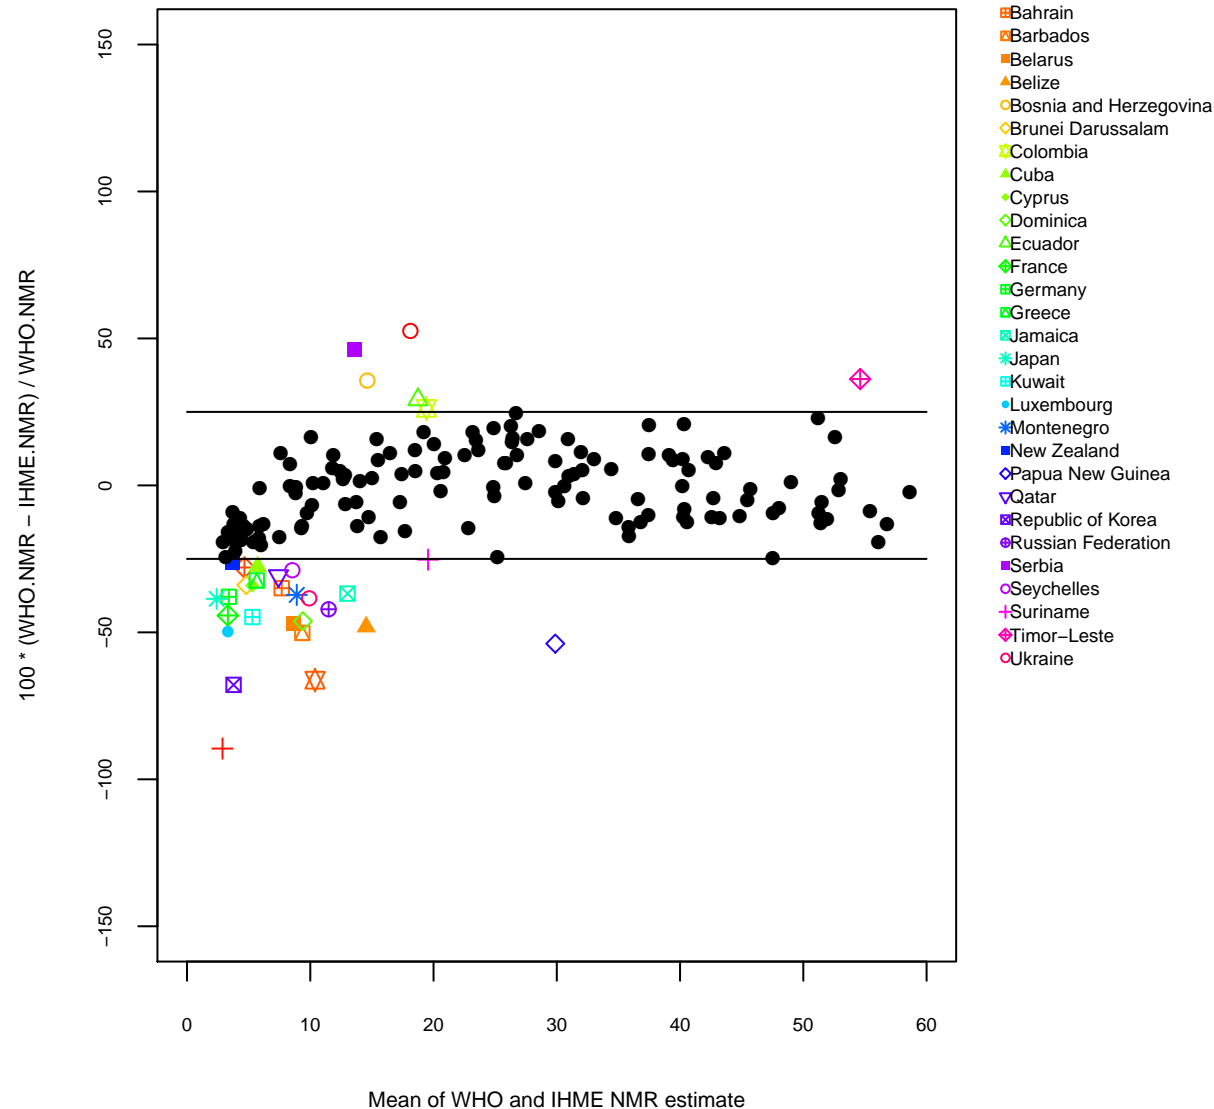

1991

Comparison of WHO and IHME NMR estimates across countries

Countries with greater than ( $\pm$ )25% relative difference are indicated

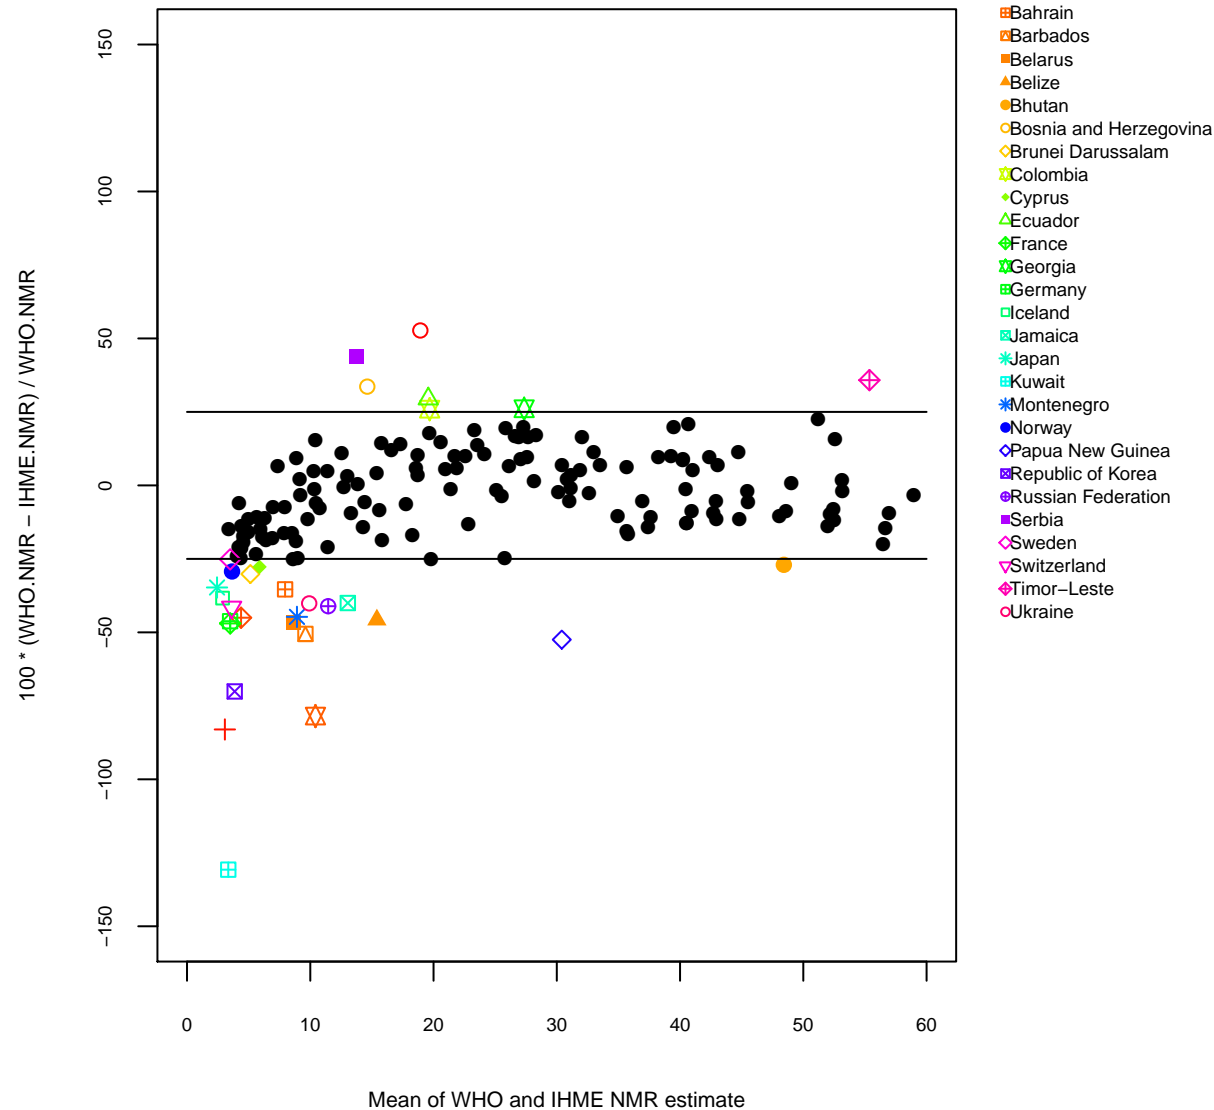

1990

Comparison of WHO and IHME NMR estimates across countries

Countries with greater than ( $\pm$ )25% relative difference are indicated

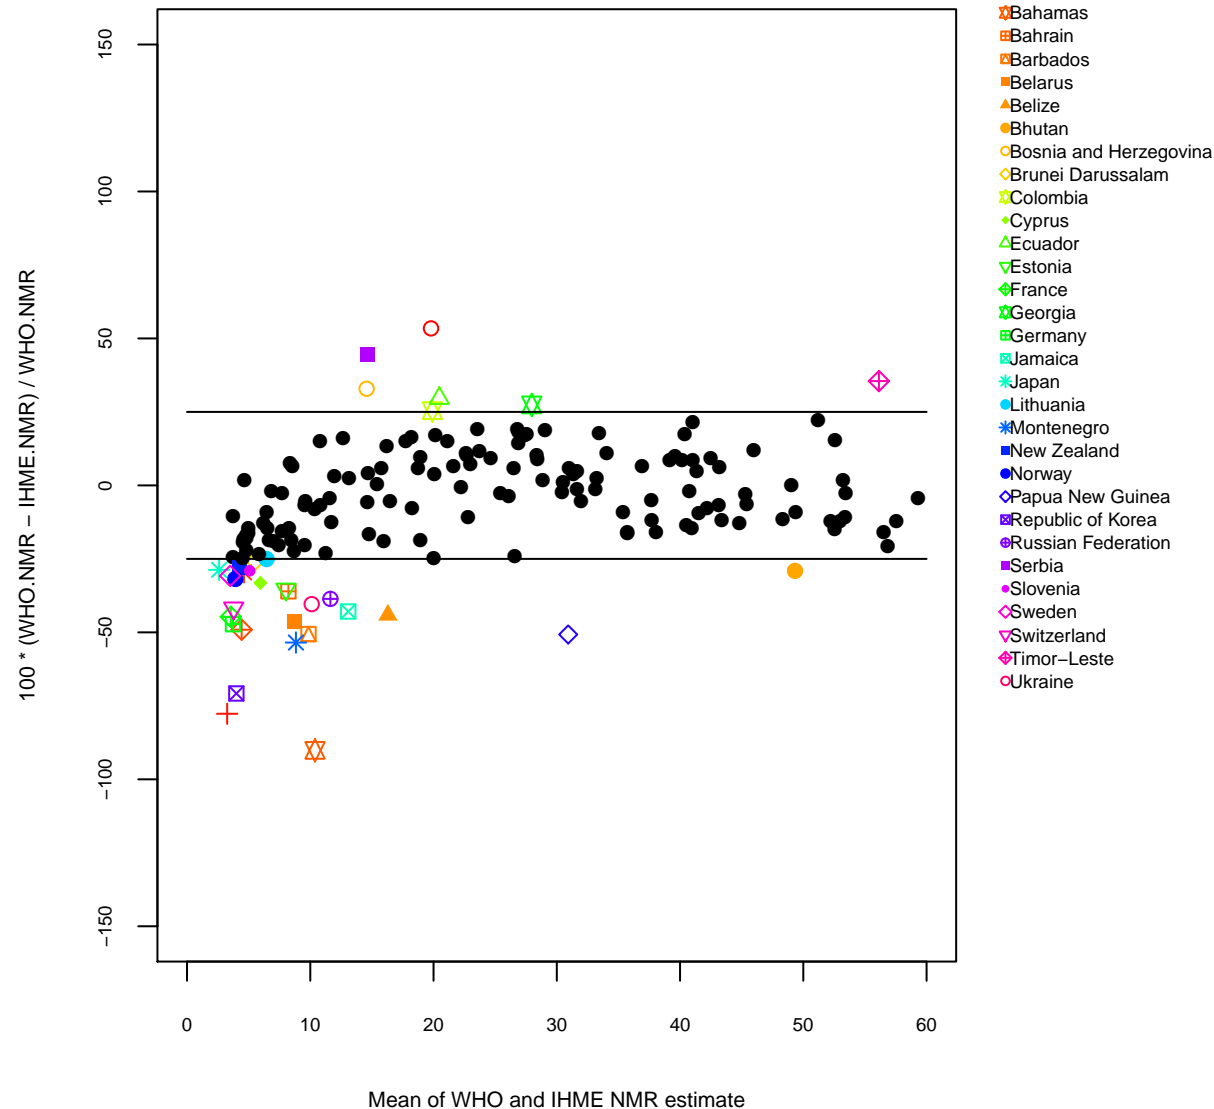

Supplement: pmed.1001080.s005.pdf [file pmed.1001080.s005.pdf]
