# Supplementary material
Source: PubMed Central journal article supplement (PMC3168874)

**Global**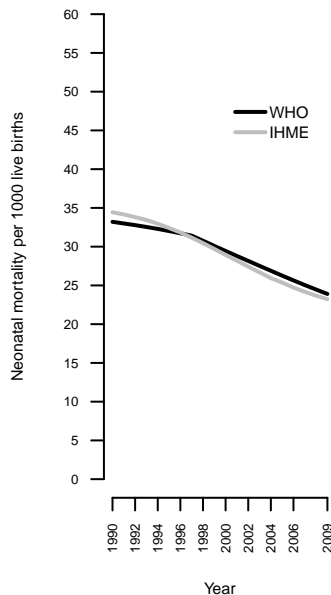**HIC**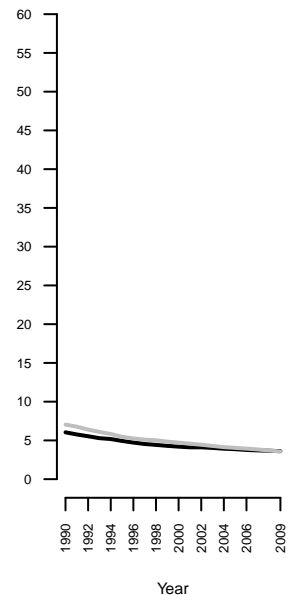**Africa LMIC**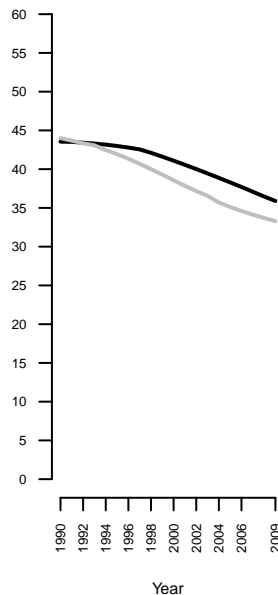**Americas LMIC**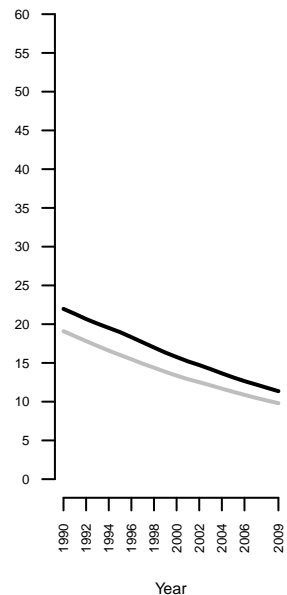**Eastern Mediterranean LMIC**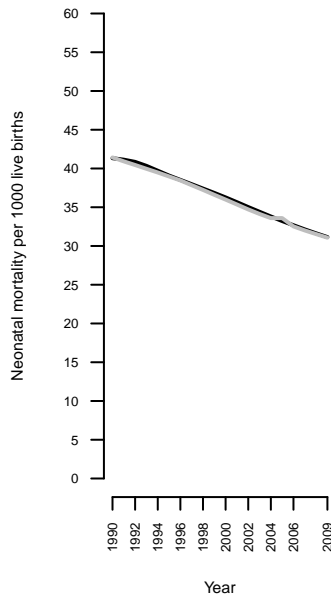**Europe LMIC**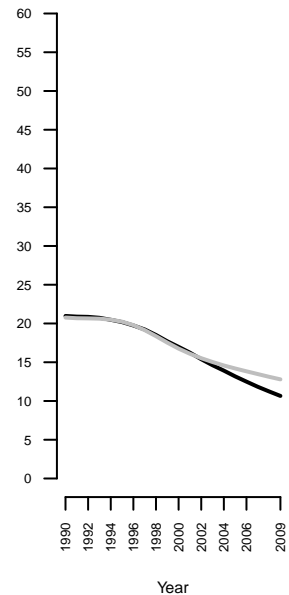**South-East Asia LMIC**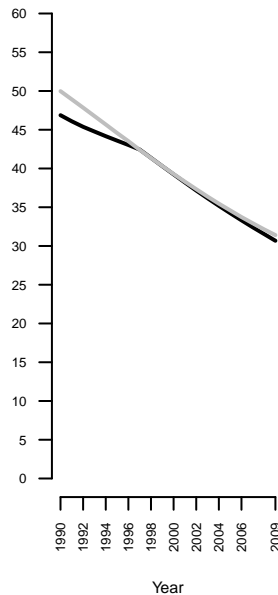**Western Pacific LMIC**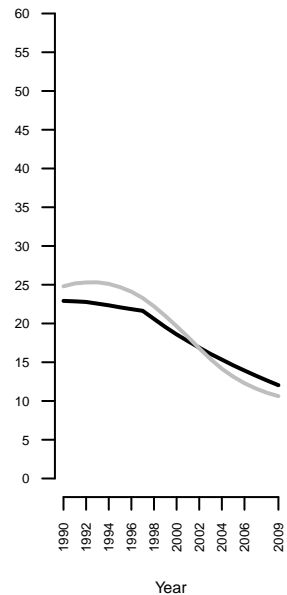

**Global**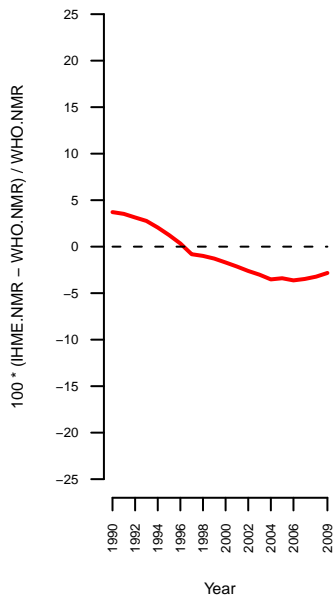**HIC**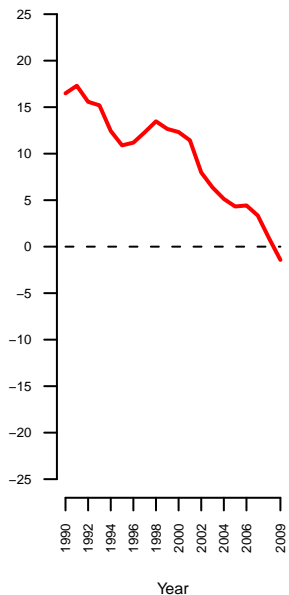**Africa LMIC**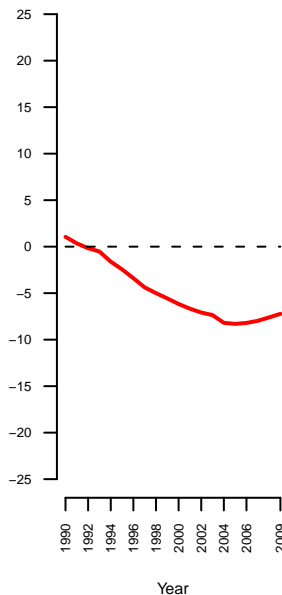**Americas LMIC**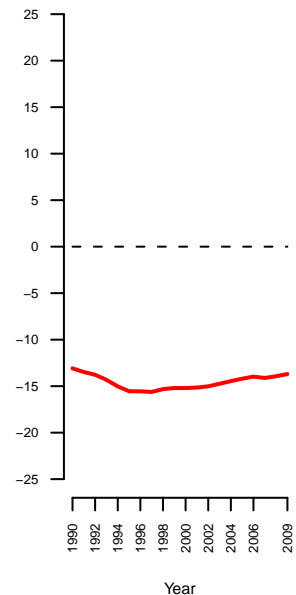**Eastern Mediterranean LMIC**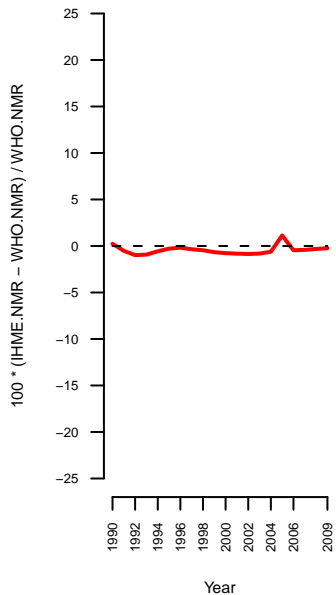**Europe LMIC**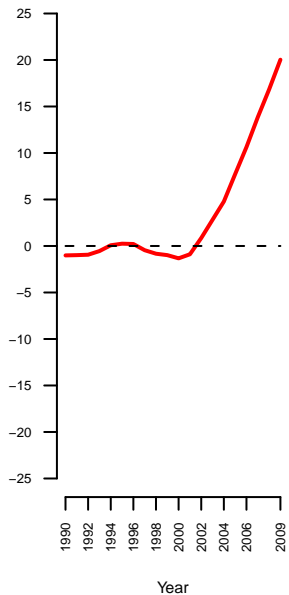**South-East Asia LMIC**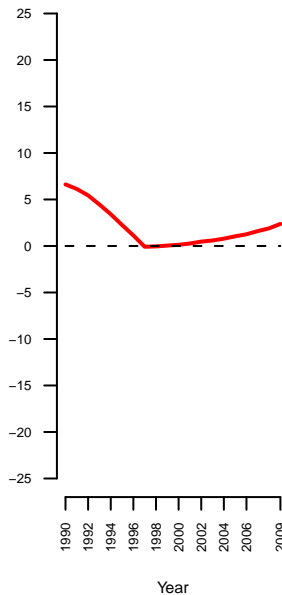**Western Pacific LMIC**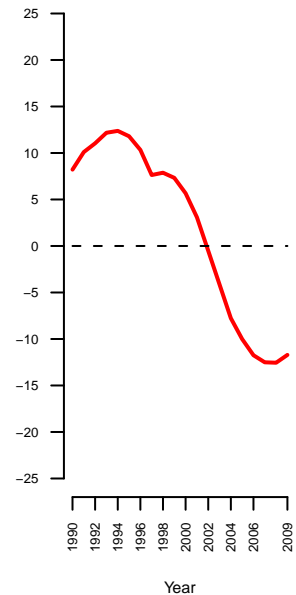

Supplement: pmed.1001080.s006.pdf [file pmed.1001080.s006.pdf]
