# Supplementary material
Source: PubMed Central journal article supplement (PMC3168874)
Supplement: pmed.1001080.s004.pdf [file pmed.1001080.s004.pdf]

**2009**  
 $R^2 = 0.96$

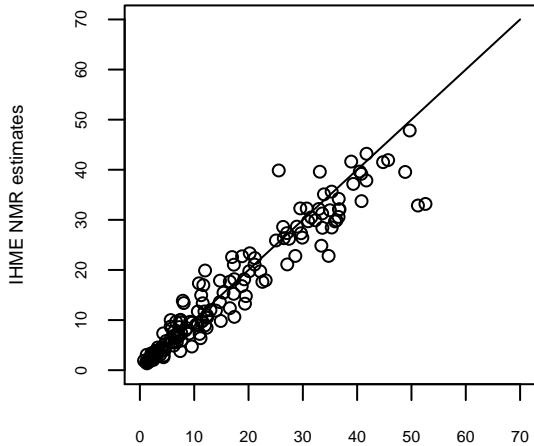

WHO NMR estimates

**2008**  
 $R^2 = 0.96$

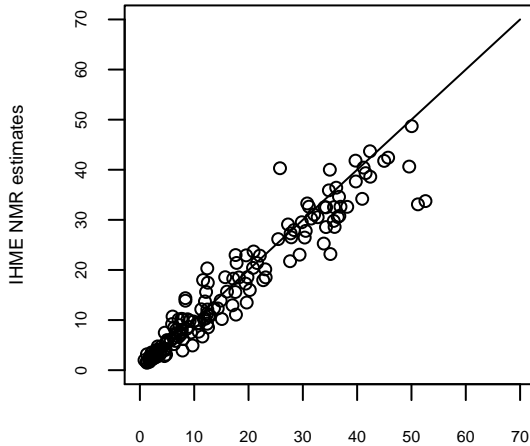

WHO NMR estimates

**2007**  
 $R^2 = 0.97$

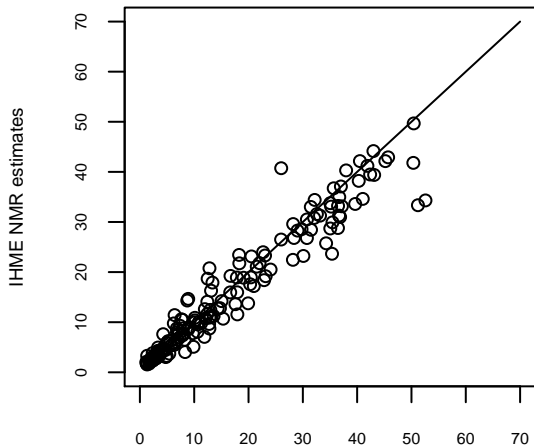

WHO NMR estimates

**2006**  
 $R^2 = 0.97$

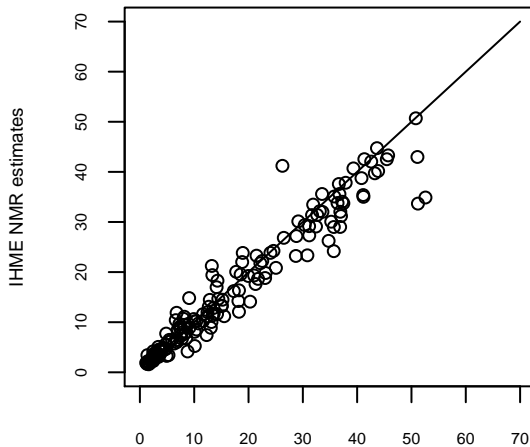

WHO NMR estimates

**2005**  
 $R^2 = 0.97$

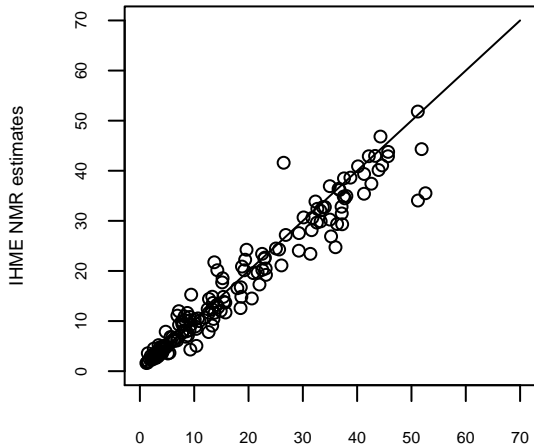

WHO NMR estimates

**2004**  
 $R^2 = 0.97$

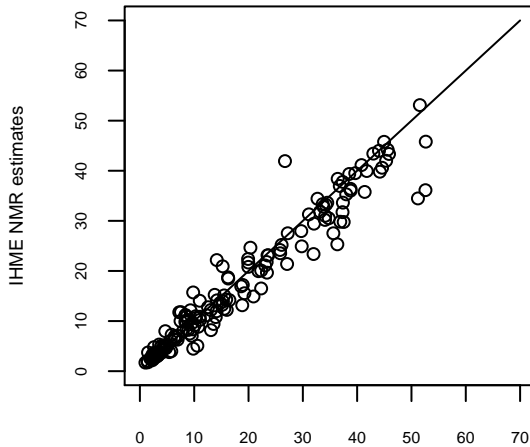

WHO NMR estimates

**2003**  
 $R^2 = 0.97$

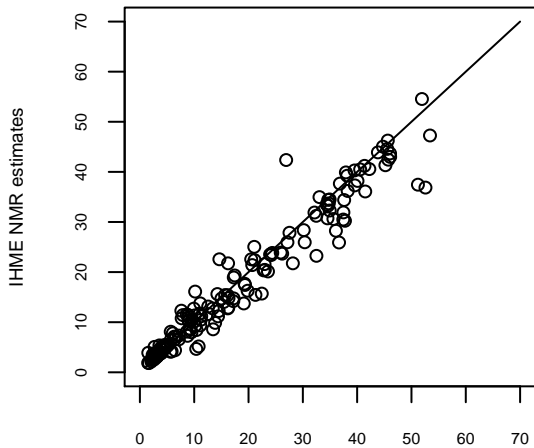

WHO NMR estimates

**2002**  
 $R^2 = 0.97$

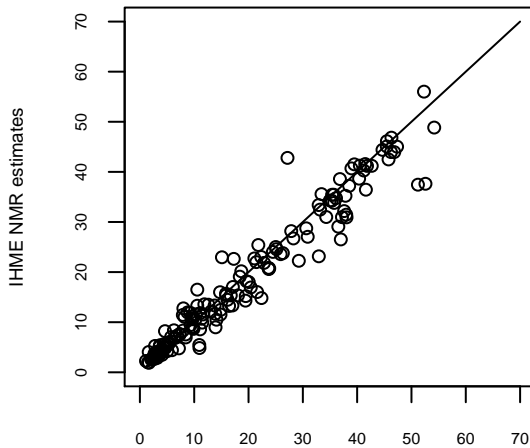

WHO NMR estimates

**2001**  
 $R^2 = 0.97$

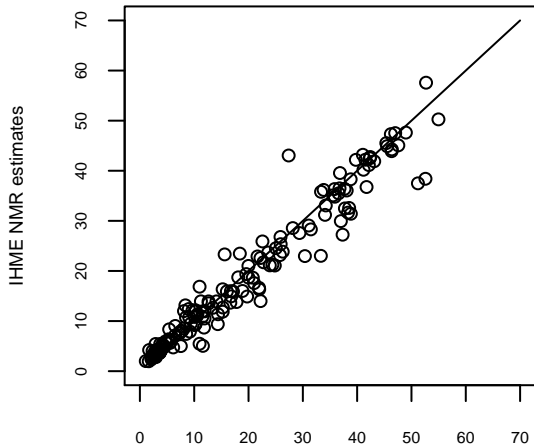

WHO NMR estimates

**2000**  
 $R^2 = 0.97$

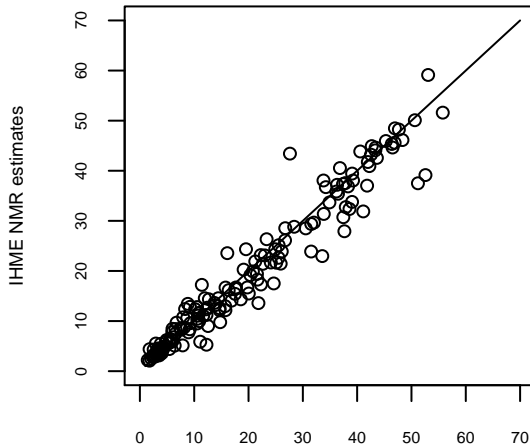

WHO NMR estimates

**1999**  
 $R^2 = 0.97$

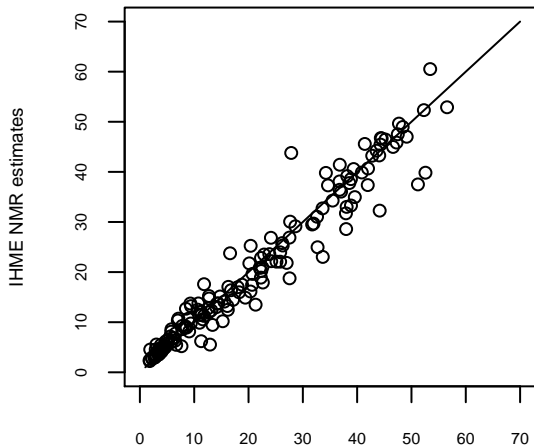

WHO NMR estimates

**1998**  
 $R^2 = 0.97$

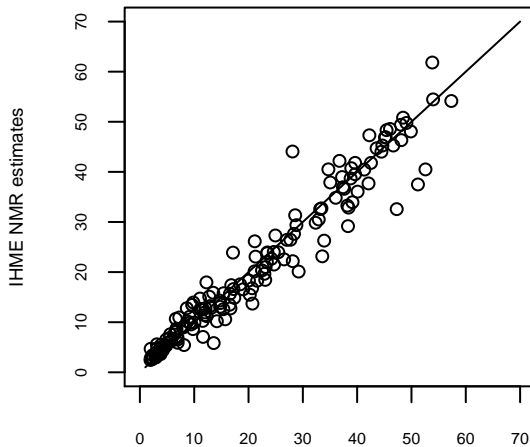

WHO NMR estimates

**1997**  
 $R^2 = 0.97$

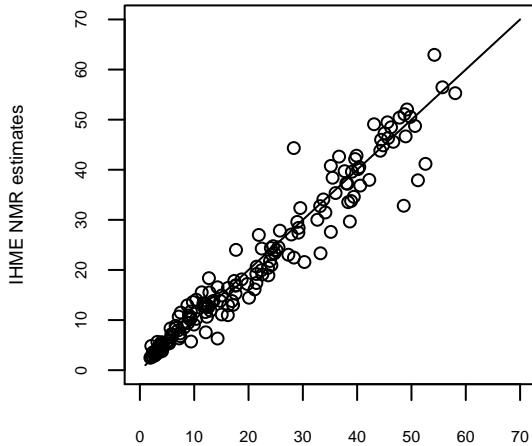

WHO NMR estimates

**1996**  
 $R^2 = 0.97$

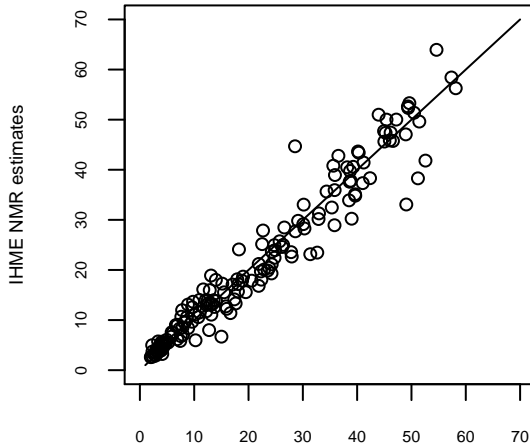

WHO NMR estimates

**1995**  
 $R^2 = 0.97$

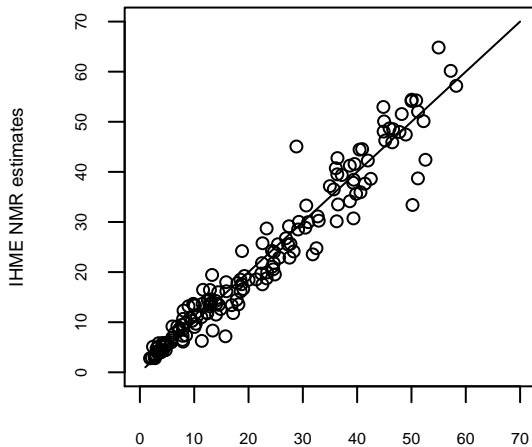

WHO NMR estimates

**1994**  
 $R^2 = 0.97$

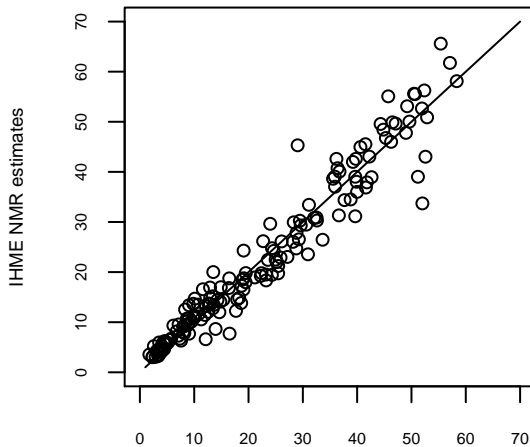

WHO NMR estimates

**1993**  
 $R^2 = 0.97$

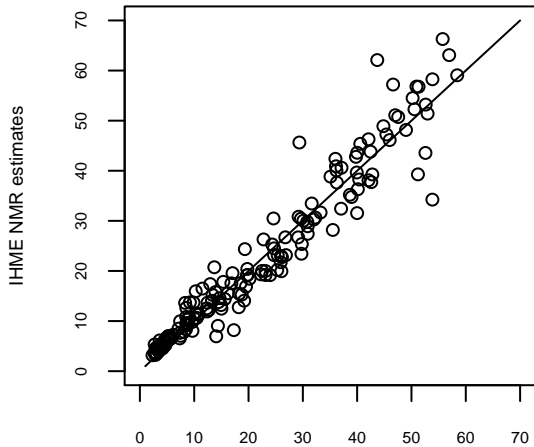

WHO NMR estimates

**1992**  
 $R^2 = 0.97$

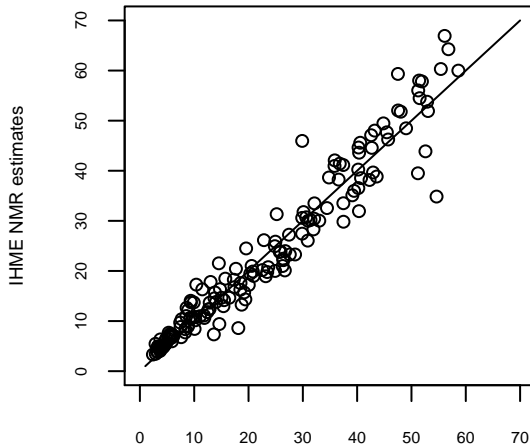

WHO NMR estimates

**1991**  
 $R^2 = 0.97$

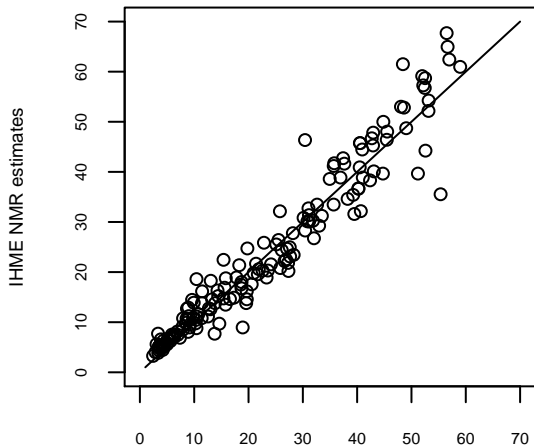

WHO NMR estimates

**1990**  
 $R^2 = 0.96$

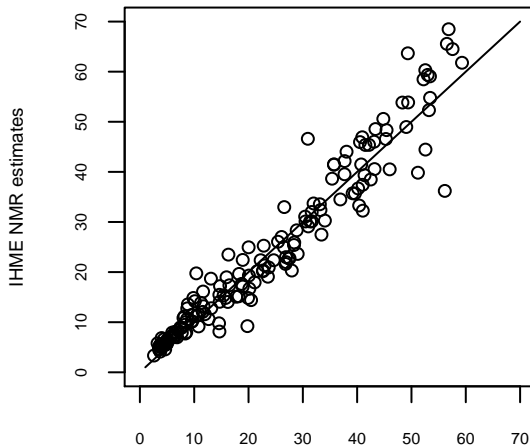

WHO NMR estimates
